# Supplementary material for: Global yellow fever vaccination coverage from 1970 to 2016: an adjusted retrospective analysis
Source: PubMed Central journal article supplement (PMC5666204; doi:10.1016/s1473-3099(17)30419-x), 2017-11
Supplement: mmc1.pdf [file mmc1.pdf]

# THE LANCET Infectious Diseases

## Supplementary webappendix

This webappendix formed part of the original submission and has been peer reviewed. We post it as supplied by the authors.

Supplement to: Shearer FM, Moyes CL, Pigott DM, et al. Global yellow fever vaccination coverage from 1970 to 2016: an adjusted retrospective analysis. *Lancet Infect Dis* 2017; published online August 16. [http://dx.doi.org/10.1016/S1473-3099\(17\)30419-X](http://dx.doi.org/10.1016/S1473-3099(17)30419-X).

## **Appendices to “Estimating global yellow fever vaccination coverage from 1970 to 2016: an empirical analysis tracking vaccination in all age cohorts”**

Freya M Shearer<sup>1\*</sup>, Catherine L Moyes<sup>1</sup>, David M Pigott<sup>2</sup>, Oliver J Brady<sup>3</sup>, Fatima Marinho<sup>4</sup>, Aniruddha Deshpande<sup>2</sup>, Joshua Longbottom<sup>1</sup>, Annie J Browne<sup>1</sup>, Moritz UG Kraemer<sup>5,6,7</sup>, Kathleen M O’Reilly<sup>8</sup>, Joachim Hombach<sup>9</sup>, Sergio Yactayo<sup>10</sup>, Valdelaine EM de Araújo<sup>11</sup>, Algaêr A da Nóbrega<sup>11</sup>, Jonathan F Mosser<sup>2,12</sup>, Jeffrey D Stanaway<sup>2</sup>, Stephen S Lim<sup>2</sup>, Simon I Hay<sup>1,2</sup>, Nick Golding<sup>13</sup>, Robert C Reiner Jr<sup>2</sup>

<sup>1</sup>Big Data Institute, Li Ka Shing Centre for Health Information and Discovery, University of Oxford, Oxford OX3 7LF, United Kingdom

<sup>2</sup>Institute for Health Metrics and Evaluation, University of Washington, 2301 5<sup>th</sup> Avenue, Suite 600, Seattle, WA, 98121, United States of America

<sup>3</sup>Department of Infectious Disease Epidemiology, London School of Hygiene and Tropical Medicine, London, WC1E 7HT, United Kingdom

<sup>4</sup>University of State of Rio de Janeiro, Maracana, Rio de Janeiro 20550-900, Brazil

<sup>5</sup>Department of Zoology, University of Oxford, New Radcliffe House, Radcliffe Observatory Quarter, 6GG, Woodstock Rd, Oxford OX2, United Kingdom

<sup>6</sup>Harvard Medical School, 25 Shattuck St, Boston, MA 02115, United States of America

<sup>7</sup>Boston Children’s Hospital, 300 Longwood Ave, Boston, MA 02115, United States of America

<sup>8</sup>Department of Disease Control, London School of Hygiene and Tropical Medicine, London WC1E 7HT, United Kingdom

<sup>9</sup>World Health Organization, Initiative for Vaccine Research (IVR), Immunization, Vaccines and Biologicals (IVB), 20 Av Appia, 1211 Geneva 27. Switzerland

<sup>10</sup>World Health Organization, Infectious Hazard Management (IHM), 20 Av Appia, 1211 Geneva 27. Switzerland

<sup>11</sup>Secretariat of Health Surveillance of the Ministry of Health of Brazil, SRTVN 701, Via W5 Norte, Ed. PO700, 6<sup>o</sup> andar, CEP 70723-040, Brazil

<sup>12</sup>Division of Pediatric Infectious Diseases, Seattle Children’s Hospital/University of Washington, PO Box 5371, Seattle, WA 981452, United States of America

<sup>13</sup>Quantitative & Applied Ecology Group, School of BioSciences, University of Melbourne, Parkville, VIC 3010, Australia

\*Corresponding author:

Freya M Shearer

Email: [freya.m.shearer@gmail.com](mailto:freya.m.shearer@gmail.com)

Phone: +447 575 335 558

### **Methods appendix**

#### **Data collation and extraction**

##### **Routine childhood vaccination data**

Data on routine infant vaccination coverage were obtained from annual national estimates, based on health-service-provider registries of yellow fever (YF) coverage reported yearly by each at-risk country to the World Health Organization (WHO) and United Nations International Children’s Emergency Fund (UNICEF) using the joint reporting form (JRF) on immunisation.<sup>1</sup> The data were available from the year of YF vaccine introduction into the country’s routine immunisation schedule up to 2015. Province or state level data, as estimated by the WHO/UNICEF<sup>2</sup> based on data reported in the JRF, were also available for certain countries with localised areas of YF risk, namely, Panama, Argentina, and Kenya.<sup>3</sup> The WHO/UNICEF estimates for Brazil indicated that vaccines were only administered to infants in risk zones and we assumed these estimates only applied to municipalities within areas classified as ‘endemic’ by WHO range maps.<sup>4</sup> Since we used other data types reporting up to 2016, to obtain estimates of all routine coverage for 2016, we assumed that coverage was the same as for 2015.

##### **Preventive and outbreak response vaccination campaign data**

Data on mass preventive and outbreak response campaigns were primarily extracted from published online sources including the Weekly Epidemiological Records (WERs), Disease Outbreak News (DONs), Morbidity

and Mortality Weekly Reports (MMWRs), and two WHO reports: one on mass vaccination in West and Central Africa through the 1940s to 1960s,<sup>5</sup> and another on the 2016 epidemic in the Democratic Republic of Congo<sup>6</sup>. For the WERs, DONs, and MMWRs, we searched all reports within the specified date range (see manuscript Table 1) for the keywords “yellow fever”, of which we downloaded those containing information on YF vaccination activities. The detail in these reports varied greatly from campaign to campaign and was reported at a variety of spatial scales. If vaccination coverage for a campaign was not given, it was estimated using other information, such as the number of vaccine doses administered, combined with population estimates (see ‘Processing demographic data’, below). The following information was recorded for each vaccination campaign, where available: campaign time period, target location(s), target age range, number of vaccine doses (either administered or supplied), target population size, proportion of target population vaccinated (coverage), and whether coverage was estimated from a post-campaign survey or administrative data (ie, health-service-provider reported estimates).

Where available, coverage values were derived from post-campaign coverage surveys that asked participants whether they could recall having ever received a YF vaccine (and/or their children) and whether they could present an official YF vaccination record. Post-campaign coverage surveys were used in preference of administrative data because these generally provide more reliable coverage estimates.<sup>7</sup> Finally, duplicate data were removed for campaign records covering the same location and time period, retaining the most precise records. A description of the data issues encountered and actions taken is included in Supplementary table 1 and a summary of the information extracted from the WERs, DONs, MMWRs and WHO reports can be found in Supplementary table 2.

**Supplementary table 1:** Extraction issues with preventive and outbreak response vaccination campaign data and actions taken.

| <b>Data issue</b>                                                                                                                                                                                        | <b>Action taken</b>                                                                                                    |
|----------------------------------------------------------------------------------------------------------------------------------------------------------------------------------------------------------|------------------------------------------------------------------------------------------------------------------------|
| Campaign described as “planned” or “in progress” at the time of the report but the number of vaccine doses to be administered was specified                                                              | Assumed that one dose was administered per person in targeted locations                                                |
| Campaign described as “planned” and only the target population size was specified                                                                                                                        | Campaign was excluded                                                                                                  |
| Target age group was described as “children”                                                                                                                                                             | Assumed that this referred to children less than five years of age                                                     |
| Target age groups not specified                                                                                                                                                                          | Assumed that individuals in all age groups had an equal chance of receiving a vaccine dose                             |
| Coverage was reported to be greater than 100%                                                                                                                                                            | Coverage resolved to 100%                                                                                              |
| Coverage range was stated (eg, 90–95%)                                                                                                                                                                   | Recorded lower limit (eg, 90%)                                                                                         |
| The report quoted the number of people vaccinated rather than number of doses or coverage                                                                                                                | Recorded as the number of vaccine doses                                                                                |
| Coverage was not directly reported (ie, only the number of vaccine doses administered, number of people vaccinated or target population size <i>etc.</i> was provided)                                   | Estimated coverage by calculating the size of target population (denominator) using WorldPop and UN WPP data           |
| Coverage reported without specifying the size of the target population                                                                                                                                   | Assumed that target population size equalled population of target locations                                            |
| Target population size reported without specifying the coverage value                                                                                                                                    | Coverage was assumed to be 100%                                                                                        |
| The number of vaccine doses, the number of people vaccinated or the size of the target population was reported to be greater than the total estimated number of people in the specified target locations | Target population size was replaced with estimated population size of target locations, meaning that coverage was 100% |
| The number of vaccine doses was provided without reporting the achieved coverage or the target population size                                                                                           | Assumed that number of people vaccinated equalled number of vaccine doses                                              |
| Target population size not reported                                                                                                                                                                      | Assumed target population size equalled population of target                                                           |

|                                                                                                                                                                                                |                                                                                                                                            |
|------------------------------------------------------------------------------------------------------------------------------------------------------------------------------------------------|--------------------------------------------------------------------------------------------------------------------------------------------|
|                                                                                                                                                                                                | locations                                                                                                                                  |
| Coverage or number of vaccine doses was aggregated over a number of target locations                                                                                                           | Assumed that individuals in each location had an equal chance of receiving a vaccine dose                                                  |
| Unclear whether the campaign was targeting locations at the third or fourth order administrative unit (ie, locations have the same name and it was not clear which was targeted in the report) | Assumed campaign targeted the third order administrative unit                                                                              |
| Target locations provided at the third or fourth order administrative level                                                                                                                    | Coverage at the second administrative level was calculated                                                                                 |
| Target locations not specified                                                                                                                                                                 | Divided number of people vaccinated by estimated population size within broad target locations or within the entire country                |
| Target locations listed as “endemic” or “at risk” regions                                                                                                                                      | Divided number of people vaccinated by estimated population size within districts classified as endemic or at-risk by the WHO <sup>4</sup> |
| Number of vaccine doses aggregated over multiple years                                                                                                                                         | Assumed that an equal number of doses were administered each year                                                                          |
| Different coverage values reported from a post-campaign survey based on 1) combination of respondent recall and the presence of official vaccination records and 2) vaccination records only   | Used coverage value based on combination of respondent recall and presence of official vaccination records                                 |

**Supplementary table 2:** Preventive and outbreak response campaigns reported in each Weekly Epidemiological Report (WER)<sup>8</sup>, Disease Outbreak News (DON)<sup>9</sup>, Morbidity and Mortality Weekly Report (MMWR), and two World Health Organization reports: one on mass immunization in West and Central Africa in the 1940s and 1950s<sup>5</sup> and another on the 2016 YF epidemic in the Democratic Republic of Congo<sup>6</sup>. The DONs are identified by the date of issue in the format ddmmyy and the WERs by four digits representing the volume and issue numbers.

| Data source   | Target country | Target subnational location/s (administrative level/s of target location/s)                                  | Campaign start year | Campaign end year |
|---------------|----------------|--------------------------------------------------------------------------------------------------------------|---------------------|-------------------|
| DON011102     | Senegal        | Mbacké, Bambey (2)                                                                                           | 2002                | 2002              |
| DON031105     | Mali           | Kadiolo, Kolondieba (2)                                                                                      | 2005                | 2005              |
| DON031213     | Sudan          | Western Darfur, Southern Darfur, Northern Darfur (1)                                                         | 2012                | 2012              |
| DON070601     | Peru           | Puinahua, San Pablo, Iquitos (3)                                                                             | 2001                | 2001              |
| DON080110     | Côte d'Ivoire  | Kaniso, Sandégué, Minignan, Samantiguila (3)                                                                 | 2009                | 2009              |
| DON080808     | Côte d'Ivoire  | Abidjan (2)                                                                                                  | 2001                | 2001              |
| DON081013     | Cameroon       | Dibombari, Edéa, Loum, Manjo, Manoka, Mbanga, Melong, Ndom, Ngambé, Nkondjock, Nkongsamba, Pouma, Yabass (3) | 2013                | 2013              |
| DON110304     | Liberia        | Margibi, Grand Bassa, Grand Gedeh (1)                                                                        | 2004                | 2004              |
| DON281105     | Mali           | Kangaba, Kati, Kayes, Kéniébe, Kita, Bafoulabé (2)                                                           | 2005                | 2005              |
| DON300903     | Sierra Leone   | Tonkolili (2)                                                                                                | 2003                | 2003              |
| DON260816     | Angola         | Luanda, Benguela, Cuanza Sul, Huambo, Huíla, Uíge (1)                                                        | 2016                | 2016              |
| Durieux, 1956 | Mauritania     | NA                                                                                                           | 1939                | 1953              |
|               | Senegal        | NA                                                                                                           | 1939                | 1953              |
|               | Mali           | NA                                                                                                           | 1939                | 1953              |
|               | Guinea         | NA                                                                                                           | 1939                | 1953              |



|         |                                  |                                                                                                                         |      |      |
|---------|----------------------------------|-------------------------------------------------------------------------------------------------------------------------|------|------|
|         | Côte d'Ivoire                    | NA                                                                                                                      | 1939 | 1953 |
|         | Burkina Faso                     | NA                                                                                                                      | 1939 | 1953 |
|         | Benin                            | NA                                                                                                                      | 1939 | 1953 |
|         | Niger                            | NA                                                                                                                      | 1939 | 1953 |
|         | Togo                             | NA                                                                                                                      | 1940 | 1953 |
|         | Chad                             | NA                                                                                                                      | 1944 | 1953 |
|         | Central African Republic         | NA                                                                                                                      | 1944 | 1953 |
|         | Republic of Congo                | NA                                                                                                                      | 1944 | 1953 |
|         | Gabon                            | NA                                                                                                                      | 1944 | 1953 |
| WER4543 | Peru                             | Oxapampa, Tarma, Satipo (2)                                                                                             | 1969 | 1970 |
| WER4631 | Ghana                            | Upper East, Upper West (1)                                                                                              | 1969 | 1969 |
|         | Ghana                            | Brong-Ahafo Region (1)                                                                                                  | 1970 | 1970 |
|         | Nigeria                          | Plateau, Bauchi (1)                                                                                                     | 1969 | 1969 |
| WER4724 | Democratic Republic of the Congo | Gemena, Dungu (3)                                                                                                       | 1958 | 1958 |
|         | Democratic Republic of the Congo | Gemena (3)                                                                                                              | 1972 | 1972 |
| WER5034 | Nigeria                          | Abia, Anambra, Ebonyi, Enugu, Imo, Delta, Rivers (1)                                                                    | 1974 | 1974 |
| WER5139 | Bolivia                          | Chuquisaca, La Paz, Santa Cruz, Cochabamba, Tarija (1)                                                                  | 1975 | 1975 |
|         | Ecuador                          | Napo Province (1)                                                                                                       | 1975 | 1975 |
| WER5224 | Colombia                         | Casanare (1)                                                                                                            | 1976 | 1976 |
| WER5423 | Gambia                           | NA                                                                                                                      | 1978 | 1979 |
| WER5440 | Colombia                         | Norte de Santander (1)                                                                                                  | 1979 | 1979 |
| WER5440 | Venezuela                        | Zulia, Trujillo, Mérida (1)                                                                                             | 1941 | 1978 |
| WER5511 | Ghana                            | Volta, Eastern, Brong-Ahafo, Upper East, Upper West (1)                                                                 | 1979 | 1979 |
| WER5545 | Senegal                          | Fatick, Kaolack, Kaffrine, Tambacounda, Kédougou, Kolda, Sédhiou, Ziguinchor (1)                                        | 1979 | 1979 |
| WER5545 | Trinidad and Tobago              | NA                                                                                                                      | 1979 | 1979 |
| WER5633 | Cameroon                         | Diamaré (2)                                                                                                             | 1980 | 1980 |
| WER5739 | Bolivia                          | NA                                                                                                                      | 1981 | 1982 |
|         | Brazil                           | Maranhão, Acre, Amazonas, Pará, Mato Grosso, Mato Grosso del Sul, Goiás, Rondonia, Federal District, Roraima, Amapá (1) | 1937 | 1983 |
|         | Senegal                          | Thiès (1)                                                                                                               | 1981 | 1981 |
| WER5841 | Ghana                            | NA                                                                                                                      | 1980 | 1982 |
| WER5943 | Burkina Faso                     | Centre (1)                                                                                                              | 1983 | 1983 |
|         | Ghana                            | Northern, Upper East (1)                                                                                                | 1983 | 1983 |

|            |               |                                                                                                                                                                                         |      |      |
|------------|---------------|-----------------------------------------------------------------------------------------------------------------------------------------------------------------------------------------|------|------|
| WER6043    | Togo          | Central Region (1)                                                                                                                                                                      | 1983 | 1983 |
| WER6056    | Brazil        | Presidente Prudente (1)                                                                                                                                                                 | 1985 | 1985 |
| WER6406    | Mali          | Kita, Kati, Kangaba, Kolokani, Bafoulabé, Diéma, Kéniéba, Nioro du Sahel, Yélimané, Banamba, Dioïla, Koulikoro, Nara, Mopti, Ségou, Sikasso (2)                                         | 1987 | 1987 |
| WER6423    | Bolivia       | Santa Cruz, Montero, Carrasco, Ichilo (3)                                                                                                                                               | 1985 | 1989 |
| WER6528    | Angola        | Luanda (1)                                                                                                                                                                              | 1988 | 1988 |
| WER6733    | Nigeria       | Abuja, Akwa Ibam, Anamba, Bauchi, Delta, Edo, Benue, Borno, Cross River, Adamawa, Taraba, Imo, Kaduna, Kano, Katsina, Kwara, Lagos, Niger, Oyo, Ogun, Ondo, Plateau, Rivers, Sokoto (1) | 1986 | 1989 |
| WER7010    | Kenya         | Baringo, Elgeyo Marakwet (2)                                                                                                                                                            | 1993 | 1993 |
| WER7015    | Nigeria       | Orsu (2)                                                                                                                                                                                | 1994 | 1994 |
| WER7050    | Liberia       | Grand Bassa (1)                                                                                                                                                                         | 1995 | 1995 |
| WER7051/52 | Sierra Leone  | Kenema (2)                                                                                                                                                                              | 1995 | 1995 |
| WER7124    | Gambia        | NA                                                                                                                                                                                      | 1978 | 1979 |
| WER7142    | Liberia       | Buchanan, Grand Bassa (1)                                                                                                                                                               | 1995 | 1995 |
| WER7145    | Benin         | Atakora, Borgou (1)                                                                                                                                                                     | 1996 | 1996 |
| WER7211    | Bolivia       | Cochabamba, La Paz, Beni, Santa Cruz (1)                                                                                                                                                | 1997 | 1997 |
| WER7335    | Brazil        | Afuá (3)                                                                                                                                                                                | 1998 | 1998 |
| WER7345    | Venezuela     | Amazonas (1)                                                                                                                                                                            | 1998 | 1998 |
| WER7346    | Benin         | Atakora, Borgou (1)                                                                                                                                                                     | 1998 | 1998 |
|            | Ghana         | Upper East Region (1)                                                                                                                                                                   | 1996 | 1997 |
|            | Liberia       | Voinjama, Kolahun, Foya (2)                                                                                                                                                             | 1997 | 1997 |
| WER7401    | Burkina Faso  | Batié (3)                                                                                                                                                                               | 1998 | 1998 |
| WER7540    | Bolivia       | Cordillera (2)                                                                                                                                                                          | 1999 | 1999 |
|            | Brazil        | NA                                                                                                                                                                                      | 1990 | 2001 |
|            | Liberia       | Nimba (1)                                                                                                                                                                               | 1998 | 1998 |
| WER7743    | Senegal       | NA                                                                                                                                                                                      | 2002 | 2002 |
| WER8029    | Burkina Faso  | Bobo-Dioulasso, Nouna, Solenzo, Sindou, Gaoua (3)                                                                                                                                       | 2004 | 2004 |
|            | Colombia      | Cesar, Magdalena, La Guajira (1)                                                                                                                                                        | 2003 | 2004 |
|            | Liberia       | Bong, Nimba (1)                                                                                                                                                                         | 2004 | 2004 |
|            | Mali          | Kita (2)                                                                                                                                                                                | 2004 | 2004 |
|            | Venezuela     | Unspecified high risk areas                                                                                                                                                             | 2006 | 2006 |
|            | Venezuela     | Unspecified enzootic areas                                                                                                                                                              | 2002 | 2004 |
| WER8051/52 | Cote d'Ivoire | Bondoukou, Bouna (3)                                                                                                                                                                    | 2005 | 2005 |
| WER8133    | Burkina Faso  | Batié, Gaoua, Banfora (3)                                                                                                                                                               | 2005 | 2005 |
|            | Senegal       | Bakel (2)                                                                                                                                                                               | 2005 | 2005 |
|            | Sudan         | South Kordofan (1)                                                                                                                                                                      | 2005 | 2005 |
| WER8307    | Brazil        | Federal District, Goiás, Mato Grosso do Sul (1)                                                                                                                                         | 2008 | 2008 |

|         |                          |                                                                                                                                                                                                                                                                                                                                                                                                                                                                                                                   |      |      |
|---------|--------------------------|-------------------------------------------------------------------------------------------------------------------------------------------------------------------------------------------------------------------------------------------------------------------------------------------------------------------------------------------------------------------------------------------------------------------------------------------------------------------------------------------------------------------|------|------|
| WER8308 | Cameroon                 | NA                                                                                                                                                                                                                                                                                                                                                                                                                                                                                                                | 2006 | 2006 |
|         | Central African Republic | Yaloke-Bossembele (2)                                                                                                                                                                                                                                                                                                                                                                                                                                                                                             | 2006 | 2006 |
|         | Côte d'Ivoire            | Ouragahio, Korhogo (4)                                                                                                                                                                                                                                                                                                                                                                                                                                                                                            | 2006 | 2006 |
|         | Ghana                    | Sene (2)                                                                                                                                                                                                                                                                                                                                                                                                                                                                                                          | 2006 | 2006 |
|         | Mali                     | Yanfolila (2)                                                                                                                                                                                                                                                                                                                                                                                                                                                                                                     | 2005 | 2006 |
| WER8340 | Guinea                   | NA                                                                                                                                                                                                                                                                                                                                                                                                                                                                                                                | 2005 | 2005 |
| WER8350 | Mali                     | NA                                                                                                                                                                                                                                                                                                                                                                                                                                                                                                                | 2005 | 2005 |
|         | Senegal                  | NA                                                                                                                                                                                                                                                                                                                                                                                                                                                                                                                | 2002 | 2006 |
| WER8413 | Bolivia                  | NA                                                                                                                                                                                                                                                                                                                                                                                                                                                                                                                | 2007 | 2007 |
|         | Cameroon                 | Akonolinga, Zoétélé (3)                                                                                                                                                                                                                                                                                                                                                                                                                                                                                           | 2007 | 2007 |
|         | Senegal                  | Dagana (and Richard Toll), Podor (and Pete), Linguère, Kédougou, Salémata, Saraya, Thiès (and Pout), Kaolack (and Ndofane), Foundiougne (and Sokone), Guinguinéo, Mbour (and Poponguine, Joal and Dioffior), Tivaouana (and Mekhe), Louga, Saint Louis, Saraya (2)                                                                                                                                                                                                                                                | 2007 | 2007 |
|         | Togo                     | Savanes, Kara , Centrale, Plateaux, Maritime (1)                                                                                                                                                                                                                                                                                                                                                                                                                                                                  | 2007 | 2007 |
| WER8604 | Argentina                | Bella Vista, Berón de Astrada, Capital, Concepción, Curuzú Cuatiá, Empedrado, Esquina, General Paz, General Alvear, Goya, Itatí, Ituzaingó, Lavalle, Mburucuy, Mercedes, Monte Caseros, Paso de los Libres, Saladas, San Cosme, San Luis del Palmar, San Martin, San Miguel, San Roque, Santo Tomé, Sauce, 25 de Mayo, Apóstoles, Caingúas, Candelaria, Eldorado, General Manuel Belgrano, Guarani, Iguazu, Leandro N. Alem, Libertador General San Ma, Montecarlo, Oberá, San Ignacio, San Javier, San Pedro (2) | 2008 | 2008 |
|         | Burkina Faso             | Ouahigouya (3)                                                                                                                                                                                                                                                                                                                                                                                                                                                                                                    | 2008 | 2008 |
|         | Cameroon                 | Abong Mbang, Nguelemdouka (3)                                                                                                                                                                                                                                                                                                                                                                                                                                                                                     | 2008 | 2008 |
|         | Cameroon                 | Buea, Mbongue (3)                                                                                                                                                                                                                                                                                                                                                                                                                                                                                                 | 2009 | 2009 |
|         | Central African Republic | Bozoum, Lobaye, Sangha Mbaéré, Boali, Damara, Bria, Ouadda, Yalinga (2)                                                                                                                                                                                                                                                                                                                                                                                                                                           | 2008 | 2008 |
|         | Central African Republic | Yaloke-Bossembelle (2)                                                                                                                                                                                                                                                                                                                                                                                                                                                                                            | 2009 | 2009 |
|         | Côte d'Ivoire            | Abidjan (2)                                                                                                                                                                                                                                                                                                                                                                                                                                                                                                       | 2008 | 2008 |
|         | Côte d'Ivoire            | Madinani, Minignan (3)                                                                                                                                                                                                                                                                                                                                                                                                                                                                                            | 2009 | 2009 |
|         | Guinea                   | Bounouma, Urbain, Kouankan (3)                                                                                                                                                                                                                                                                                                                                                                                                                                                                                    | 2008 | 2008 |
|         | Guinea                   | Mandiana (2)                                                                                                                                                                                                                                                                                                                                                                                                                                                                                                      | 2009 | 2009 |
|         | Guinea                   | Faranah (2)                                                                                                                                                                                                                                                                                                                                                                                                                                                                                                       | 2009 | 2009 |
|         | Liberia                  | Nimba, Zorzor, Voinjama (1,2)                                                                                                                                                                                                                                                                                                                                                                                                                                                                                     | 2009 | 2009 |
|         | Paraguay                 | NA                                                                                                                                                                                                                                                                                                                                                                                                                                                                                                                | 2008 | 2008 |
|         | Peru                     | Unspecified endemic areas                                                                                                                                                                                                                                                                                                                                                                                                                                                                                         | 2004 | 2008 |
|         | Republic of Congo        | Cuvette-Ouest (1)                                                                                                                                                                                                                                                                                                                                                                                                                                                                                                 | 2009 | 2009 |
|         | Sierra Leone             | Bo (2)                                                                                                                                                                                                                                                                                                                                                                                                                                                                                                            | 2008 | 2008 |
| WER8634 | Cameroon                 | Bandjoun, Foubot, Kumba, Muyunka (3)                                                                                                                                                                                                                                                                                                                                                                                                                                                                              | 2010 | 2010 |

|            |                                  |                                                                                                                                                                                                                        |      |      |
|------------|----------------------------------|------------------------------------------------------------------------------------------------------------------------------------------------------------------------------------------------------------------------|------|------|
|            | Democratic Republic of the Congo | Titule, Buta (3)                                                                                                                                                                                                       | 2010 | 2010 |
|            | Guinea                           | NA                                                                                                                                                                                                                     | 2010 | 2010 |
| WER8828    | Cameroon                         | NA                                                                                                                                                                                                                     | 2012 | 2012 |
|            | Chad                             | Biltine, Assongha, Sila (1)                                                                                                                                                                                            | 2012 | 2012 |
|            | Côte d'Ivoire                    | Béoumi, Katiola, Mankon, Séguéla (3)                                                                                                                                                                                   | 2011 | 2011 |
|            | Ghana                            | Builsa, Kassena-Nankana-West, Kintampo-South (2)                                                                                                                                                                       | 2012 | 2012 |
|            | Senegal                          | Kédougou, Salémata, Saraya (2)                                                                                                                                                                                         | 2012 | 2012 |
|            | Sudan                            | Algeniema, Beida, Habila, Krenik, Azoum, Nertati, Wadi-Salith, Zalingi, Kass, Sharg-Aljebel, Alsiraif, Saraj-Omgra, Greater Bandasi, Forbranga, Mkjar, Nyala, Shataia, Edd Elfirsan, Elwihda, Kabkabyaia, Shaeriya (2) | 2012 | 2012 |
|            | Uganda                           | Abim, Agago, Kitgum, Lamwo, Pader (1)                                                                                                                                                                                  | 2011 | 2011 |
| WER8927    | Cameroon                         | Dschang, Ngoumou (3)                                                                                                                                                                                                   | 2014 | 2014 |
|            | Democratic Republic of the Congo | Lubao, Kamana, Ludimbi-Lukula (3)                                                                                                                                                                                      | 2013 | 2013 |
|            | Ethiopia                         | South Ari, Bena Tsmay, Dasenech, Gngangatom, Hammer, Jinka City, Malle, North Ari, Selamago (3)                                                                                                                        | 2013 | 2013 |
|            | Nigeria                          | Akwa Ibbom, Cross Rivers, Nasarawa (1)                                                                                                                                                                                 | 2013 | 2013 |
|            | Sudan                            | Northern Kordofan, Southern Kordofan (1)                                                                                                                                                                               | 2013 | 2013 |
| WER9026    | Cameroon                         | West Region, Southwest Region (1)                                                                                                                                                                                      | 2014 | 2014 |
|            | Democratic Republic of the Congo | Bondo, Buta, Kinkondja (3)                                                                                                                                                                                             | 2014 | 2014 |
| WER9132    | Cameroon                         | Adamaoua, Centre, East, North, North-West, West, South (1)                                                                                                                                                             | 2015 | 2015 |
|            | Sudan                            | Gedarif, Kassala, North Kordofan, Red Sea (1)                                                                                                                                                                          | 2015 | 2015 |
| WMMR020482 | Ghana                            | NA                                                                                                                                                                                                                     | 1981 | 1981 |
| WHO, 2016  | Democratic Republic of the Congo | Kwango, Cataractes Lukaya, Lulua, Lualaba, Kinshasa, Bas-Fleuve, Kasai (2)                                                                                                                                             | 2016 | 2016 |

### Processing supplementary data for Brazil

The Brazilian national immunization program information system provided more detailed data for Brazil that contained the number of vaccine doses administered in each second administrative level (municipality) in one-year age bands (from zero to four years), five-year age bands (five to 14 years) and broader age groups, 15 to 59 years and 60 plus years annually from 2006 to 2015. We assumed that this data captured all doses administered to the Brazilian population between 2006 and 2015 and thus routine and mass preventive and outbreak campaign data from other sources during this period were excluded from coverage calculations. The WHO/UNICEF estimates for Brazil reported routine coverage of infants in YF at-risk areas from 1998 onwards.<sup>3</sup> We included the WHO/UNICEF estimates from 1998 to 2005.

To assess the difference between YF vaccination coverage estimates for Brazil when using these two different data sources for the years from 2006 to 2015, we produced two sets of coverage maps (Supplementary figure 1) and two sets of estimates of the number of individuals requiring vaccination (Supplementary table 3).

**Supplementary table 3:** Estimated number of individuals (in millions) that still need to be vaccinated against yellow fever in 2016 in order to achieve the population coverage threshold of 80% recommended by the WHO

to prevent outbreaks in every municipality of Brazil. Estimates were calculated using vaccination data either from the Brazilian NIP or from a range of sources listed in manuscript Table 1.

|                           | At-risk municipalities only |            |            | All municipalities |            |            |
|---------------------------|-----------------------------|------------|------------|--------------------|------------|------------|
|                           | Conservative                | Untargeted | Optimistic | Conservative       | Untargeted | Optimistic |
| Brazilian NIP data        | 40.3                        | 6.8        | 2.1        | 121.8              | 49.7       | 27.1       |
| Data sources from Table 1 | 40.0                        | 2.0        | 0          | 122.3              | 26.3       | 0          |

**Supplementary figure 1:** Estimated proportion of the population in 2016 across all age cohorts who have ever received a yellow fever (YF) vaccine at municipality level in Brazil. Vaccination coverage was calculated using the three alternative vaccination-targeting scenarios; targeted (A & D), untargeted, unbiased (B & E), and untargeted, biased (C & F). The panels also display estimates calculated using vaccination data either from the Brazilian NIP (A-C) or from a range of sources listed in manuscript table 1 (D-F).

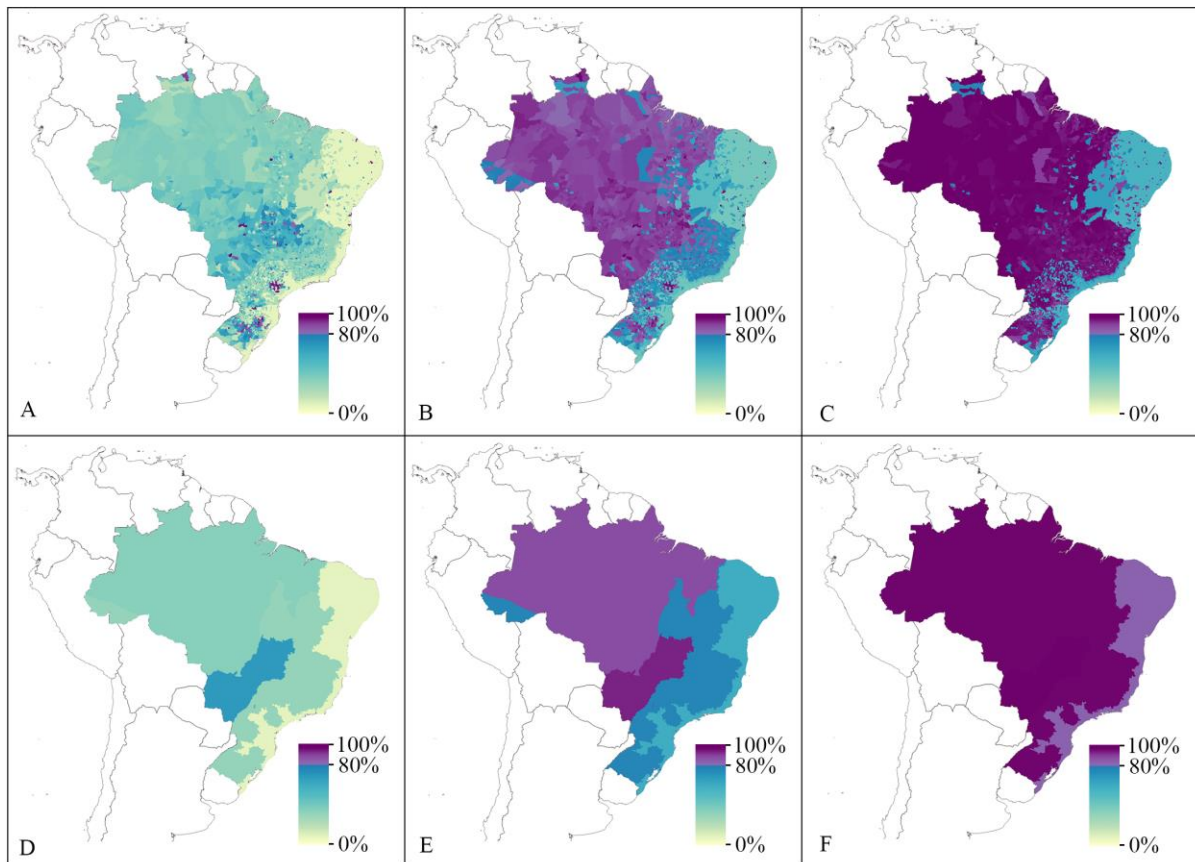

### Processing demographic data

Annual age-structured population counts for each district were required to calculate population vaccination coverage and to estimate denominators for preventive and outbreak response vaccination campaigns where coverage values could not be directly extracted from the data source. Estimates of these population counts were derived from a combination of United Nations World Population Prospects (UNWPP) (<https://esa.un.org/unpd/wpp/>),<sup>10</sup> WorldPop Project (<http://www.worldpop.org.uk/>)<sup>11</sup> and Gridded Population of the World (GPW) (<http://sedac.ciesin.columbia.edu/data/collection/gpw-v4>)<sup>12</sup> data. The latter two data sets were mosaicked together, with WorldPop data used in preference where they overlapped, to produce a fine scale human population density data surface for 2015 for each 1 km × 1 km grid square.

The UNWPP<sup>10</sup> estimates of the population size by country in five-year age bands for each year between 1950 and 2015 were disaggregated into annual birth cohorts using the methods described by Garske and colleagues<sup>13</sup>. This method required UNWPP data on infant and child mortality rates. To achieve higher spatial resolution of population distribution, these estimates were combined with the fine scale human population density data for 2015. By allocating each 1 km × 1 km grid square (or portion thereof) to a district, the proportion of each

country's population living in any particular district was estimated. It was assumed that age distributions and population growth were homogeneous within each country, and that the population proportions for each district obtained from WorldPop and GPW were applicable for all other years eg, trends in urbanisation were not captured. To estimate the population in each district for 2016, we assumed the same growth rate as the previous year.

**Vaccination probability and coverage estimates**

We tracked each age cohort (from ages zero to 99) in every district through time – from their birth year through to 2016 (ie, the earliest cohort was born in 1871 in order to track coverage of individuals aged 99 in 1970) – updating the coverage level whenever a routine, preventive or outbreak response campaign was conducted. The equations below show how the proportion vaccinated, P, for each age cohort, was calculated under each of the three vaccination-targeting scenarios, given any new vaccination activity, V.

*Untargeted, unbiased:* assuming vaccination history was not taken into account and all individuals had an equal chance of receiving a vaccine regardless of their previous vaccination status.

$$P = P_{(\text{proportion of cohort previously vaccinated})} + P_{(\text{proportion of cohort vaccinated in } V)} - P_{(\text{proportion of cohort previously vaccinated})} \times P_{(\text{proportion of cohort vaccinated in } V)}$$

*Targeted:* assuming that vaccination history was taken into account and only non-vaccinated individuals were targeted by immunisation campaigns.

$$P = P_{(\text{proportion of cohort previously vaccinated})} + P_{(\text{proportion of cohort vaccinated in } V)}$$

*Untargeted, biased:* assuming that vaccination history was not taken into account and that previously vaccinated individuals were more likely to be targeted inadvertently.

$$P = \text{maximum}(P_{(\text{proportion of cohort previously vaccinated})}, P_{(\text{proportion of cohort vaccinated in } V)})$$

To estimate population-wide vaccination under each scenario, we calculated the weighted mean proportion vaccinated across all age cohorts, weighted by population size.

## Results appendix

**Supplementary figures 2-5:** Estimated proportion of individuals within each age group that have ever received a YF vaccine (vaccination coverage) for each country at risk of YFV transmission, based on the *untargeted, unbiased* vaccination-targeting scenario. Separate plots are shown for the beginning of each decade from 1970 to 2010.

**Supplementary figure 2**

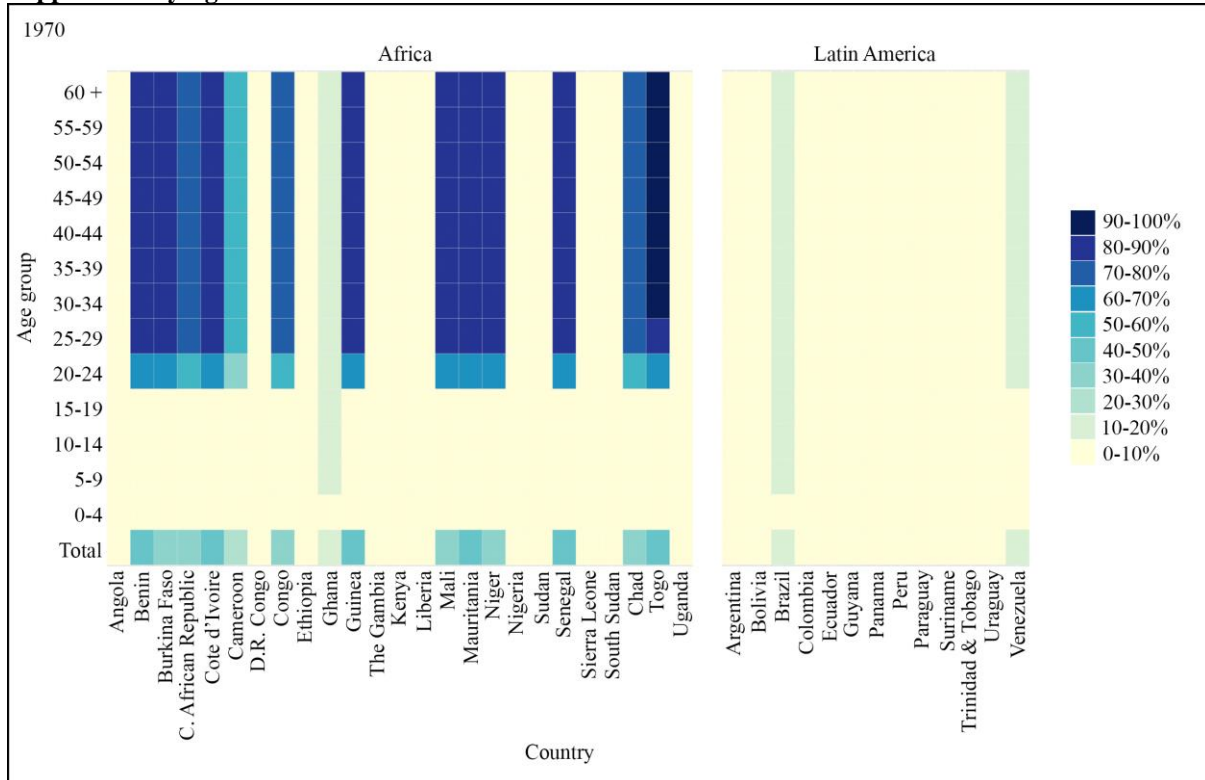

**Supplementary figure 3**

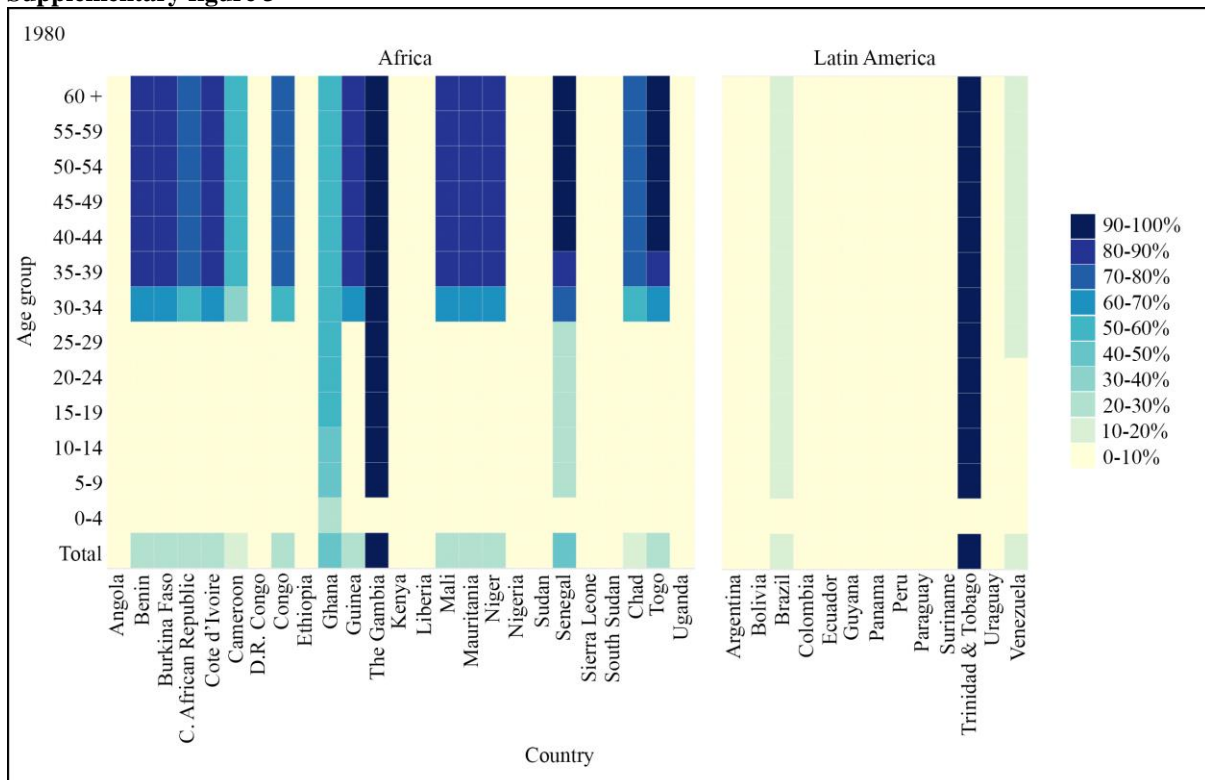

Supplementary figure 4

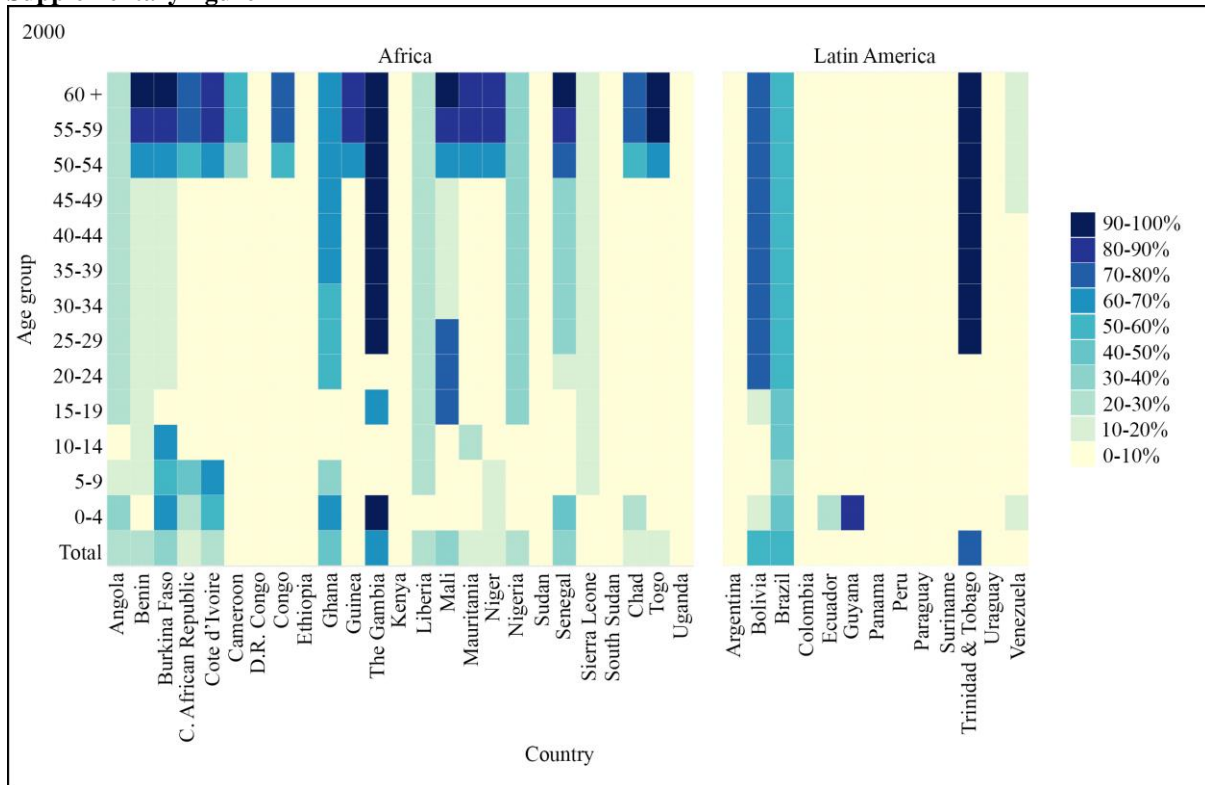

Supplementary figure 5

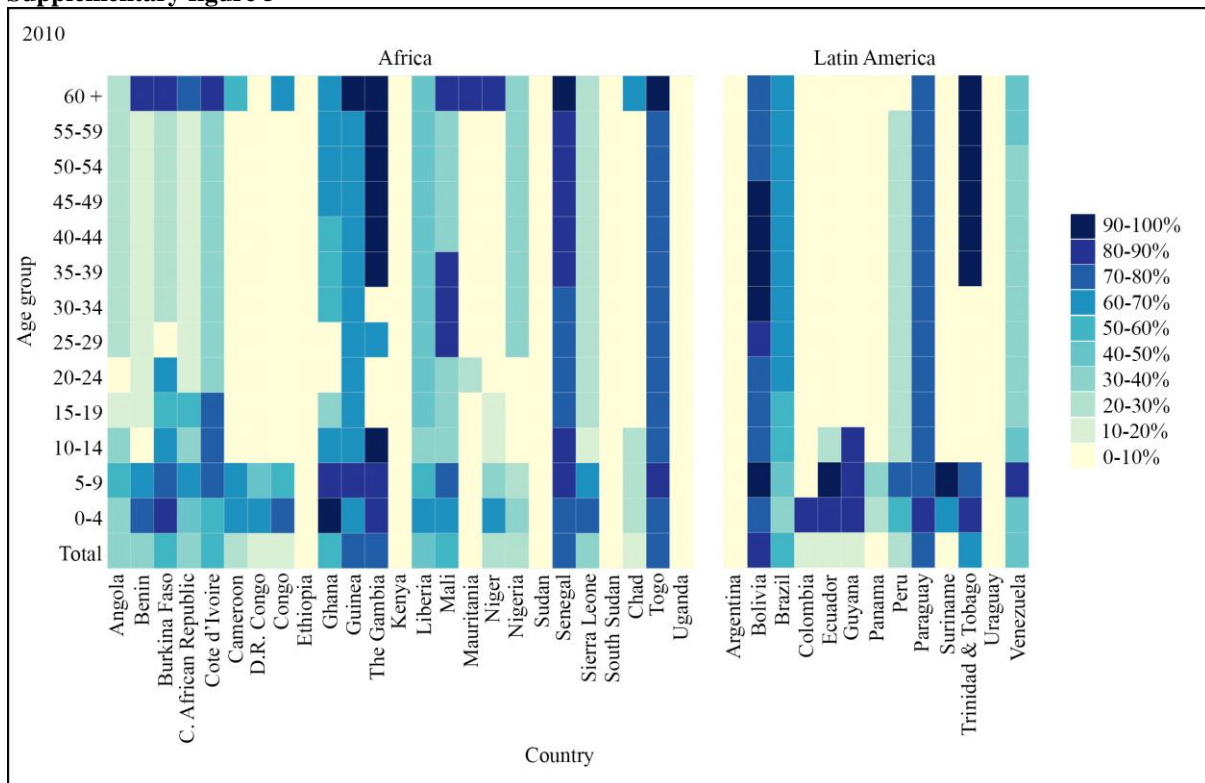



## References

1. World Health Organization. WHO/UNICEF Joint Reporting Process. [http://www.who.int/immunization/monitoring\\_surveillance/routine/reporting/reporting/en/](http://www.who.int/immunization/monitoring_surveillance/routine/reporting/reporting/en/). (accessed April 24, 2017).
2. Burton A, Monasch R, Lautenbach B, Gacic-Dobo M, Neill M, Karimov R, et al. WHO and UNICEF estimates of national infant immunization coverage: methods and processes. *Bull World Health Organ* 2009; **87**: 535–41.
3. World Health Organization. WHO UNICEF review of national immunization coverage, 1980-2015. [http://apps.who.int/immunization\\_monitoring/globalsummary/wucoveragecountrylist.html](http://apps.who.int/immunization_monitoring/globalsummary/wucoveragecountrylist.html). (accessed August 26, 2016).
4. Jentes ES, Poumerol G, Gershman MD, Hill DR, Lemarchand J, Lewis RF, et al. The revised global yellow fever risk map and recommendations for vaccination, 2010: consensus of the Informal WHO Working Group on Geographic Risk for Yellow Fever. *Lancet Infect Dis* 2011; **11**: 622–32.
5. Durieux K. Mass yellow fever vaccination in French Africa south of the Sahara. *Monograph Series World Health Organisation* 1956; **30**: 115–22.
6. World Health Organization. Report on the fight against the yellow fever epidemic 2016 in the Democratic Republic of Congo, World Health Organisation, Kinshasa, 2016.
7. Lim S, Stein D, Charrow A, Murray C. Tracking progress towards universal childhood immunisation and the impact of global initiatives: a systematic analysis of three-dose diphtheria, tetanus, and pertussis immunisation coverage. *Lancet* 2008; **372**: 2031–46
8. World Health Organization. The Weekly Epidemiological Record (WER). <http://www.who.int/wer/en/> (accessed August 26, 2016).
9. World Health Organization. Disease Outbreak News (DONs). <http://www.who.int/csr/don/en/> (accessed August 26, 2016).
10. United Nations. World Population Prospects, the 2015 Revision. <https://esa.un.org/unpd/wpp/Download/Standard/Population/> (accessed October 13, 2016).
11. WorldPop. Gridded Population Distributions, 2015. <http://www.worldpop.org.uk/> (accessed January, 2016)
12. Center for International Earth Science Information Network - CIESIN - Columbia University, United Nations Food + Agriculture Programme - FAO, Centro Internacional de Agricultura Tropical - CIAT. Gridded Population of the World, Version 4 (GPWv4): Population Count Grid. Palisades, NY: NASA Socioeconomic Data and Applications Center (SEDAC); 2005.
13. Garske T, Van Kerkhove MD, Yactayo S, Ronveaux O, Lewis RF, Staples JE, et al. Yellow fever in Africa: estimating the burden of disease and impact of mass vaccination from outbreak and serological data. *Plos Med* 2014; **11**: e1001638.

**Supplementary table 4:** Vaccination coverage estimates and the estimated number of individuals that still need to be vaccinated against YF in 2016 in every district of all countries at risk of YF virus transmission (ie, classified as ‘endemic’, ‘transitional’ or ‘low potential risk of exposure’ by the WHO range maps) to achieve the 80% population coverage threshold recommended by the WHO to prevent outbreaks. An excel version of this data is also available in Dryad Digital Repository [link to be inserted upon manuscript acceptance].

| Country ID | Country name | GAUL code | District name     | Vaccination coverage 2016 |            |            | Individuals requiring vaccination to meet 80% target |            |            |
|------------|--------------|-----------|-------------------|---------------------------|------------|------------|------------------------------------------------------|------------|------------|
|            |              |           |                   | Conservative              | Untargeted | Optimistic | Conservative                                         | Untargeted | Optimistic |
| AGO        | Angola       | 4206      | Ambriz            | 0.36                      | 0.36       | 0.36       | 9573                                                 | 9573       | 9573       |
| AGO        | Angola       | 4207      | Bula Atumba       | 0.36                      | 0.36       | 0.36       | 10821                                                | 10821      | 10821      |
| AGO        | Angola       | 4208      | Dande             | 0.36                      | 0.36       | 0.36       | 47601                                                | 47601      | 47601      |
| AGO        | Angola       | 4209      | Dembos            | 0.36                      | 0.36       | 0.36       | 11617                                                | 11617      | 11617      |
| AGO        | Angola       | 4210      | Icolo E Bengo     | 0.36                      | 0.36       | 0.36       | 35086                                                | 35086      | 35086      |
| AGO        | Angola       | 4211      | Nambuanguongo     | 0.36                      | 0.36       | 0.36       | 62872                                                | 62872      | 62872      |
| AGO        | Angola       | 4212      | Pango Aluquem     | 0.36                      | 0.36       | 0.36       | 9227                                                 | 9227       | 9227       |
| AGO        | Angola       | 4213      | Quissama          | 0.36                      | 0.36       | 0.36       | 17678                                                | 17678      | 17678      |
| AGO        | Angola       | 4214      | Baia Farta        | 0.67                      | 0.78       | 0.88       | 12823                                                | 2209       | 0          |
| AGO        | Angola       | 4215      | Balombo           | 0.67                      | 0.78       | 0.88       | 3640                                                 | 627        | 0          |
| AGO        | Angola       | 4216      | Benguela          | 0.67                      | 0.78       | 0.88       | 76385                                                | 13159      | 0          |
| AGO        | Angola       | 4217      | Bocoio            | 0.67                      | 0.78       | 0.88       | 7335                                                 | 1264       | 0          |
| AGO        | Angola       | 4218      | Caimbambo         | 0.67                      | 0.78       | 0.88       | 5788                                                 | 997        | 0          |
| AGO        | Angola       | 4219      | Chongoroi         | 0.67                      | 0.78       | 0.88       | 9836                                                 | 1694       | 0          |
| AGO        | Angola       | 4220      | Cubal             | 0.67                      | 0.78       | 0.88       | 29602                                                | 5100       | 0          |
| AGO        | Angola       | 4221      | Ganda             | 0.67                      | 0.78       | 0.88       | 24496                                                | 4220       | 0          |
| AGO        | Angola       | 4222      | Lobito            | 0.67                      | 0.78       | 0.88       | 114739                                               | 19766      | 0          |
| AGO        | Angola       | 4223      | Andulo            | 0.36                      | 0.36       | 0.36       | 86974                                                | 86974      | 86974      |
| AGO        | Angola       | 4224      | Camacupa          | 0.36                      | 0.36       | 0.36       | 82752                                                | 82752      | 82752      |
| AGO        | Angola       | 4225      | Catabola          | 0.36                      | 0.36       | 0.36       | 60040                                                | 60040      | 60040      |
| AGO        | Angola       | 4226      | Chinguar          | 0.36                      | 0.36       | 0.36       | 82422                                                | 82422      | 82422      |
| AGO        | Angola       | 4227      | Chitembo          | 0.36                      | 0.36       | 0.36       | 53171                                                | 53171      | 53171      |
| AGO        | Angola       | 4228      | Cuemba            | 0.36                      | 0.36       | 0.36       | 33976                                                | 33976      | 33976      |
| AGO        | Angola       | 4229      | Cunhinga          | 0.36                      | 0.36       | 0.36       | 11699                                                | 11699      | 11699      |
| AGO        | Angola       | 4230      | Kuito             | 0.36                      | 0.36       | 0.36       | 146979                                               | 146979     | 146979     |
| AGO        | Angola       | 4231      | N'harea           | 0.36                      | 0.36       | 0.36       | 11801                                                | 11801      | 11801      |
| AGO        | Angola       | 4232      | Belize            | 0.36                      | 0.36       | 0.36       | 13058                                                | 13058      | 13058      |
| AGO        | Angola       | 4233      | Buco-zau          | 0.36                      | 0.36       | 0.36       | 32020                                                | 32020      | 32020      |
| AGO        | Angola       | 4234      | Cabinda           | 0.36                      | 0.36       | 0.36       | 144274                                               | 144274     | 144274     |
| AGO        | Angola       | 4235      | Cacongo (landana) | 0.36                      | 0.36       | 0.36       | 22111                                                | 22111      | 22111      |
| AGO        | Angola       | 4236      | Calai             | 0.36                      | 0.36       | 0.36       | 25952                                                | 25952      | 25952      |

|     |        |      |                 |      |      |      |       |       |       |
|-----|--------|------|-----------------|------|------|------|-------|-------|-------|
| AGO | Angola | 4237 | Cuangar         | 0.36 | 0.36 | 0.36 | 6423  | 6423  | 6423  |
| AGO | Angola | 4238 | Cuchi           | 0.36 | 0.36 | 0.36 | 18391 | 18391 | 18391 |
| AGO | Angola | 4239 | Cuito Cuanavale | 0.36 | 0.36 | 0.36 | 19065 | 19065 | 19065 |
| AGO | Angola | 4240 | Dirico          | 0.36 | 0.36 | 0.36 | 12080 | 12080 | 12080 |
| AGO | Angola | 4241 | Mavinga         | 0.36 | 0.36 | 0.36 | 8653  | 8653  | 8653  |
| AGO | Angola | 4242 | Menongue        | 0.36 | 0.36 | 0.36 | 81484 | 81484 | 81484 |
| AGO | Angola | 4243 | Nankova         | 0.36 | 0.36 | 0.36 | 6024  | 6024  | 6024  |
| AGO | Angola | 4244 | Rivungo         | 0.36 | 0.36 | 0.36 | 15644 | 15644 | 15644 |
| AGO | Angola | 4245 | Amboim          | 0.67 | 0.78 | 0.88 | 23734 | 4089  | 0     |
| AGO | Angola | 4246 | Cassongue       | 0.67 | 0.78 | 0.88 | 12849 | 2214  | 0     |
| AGO | Angola | 4247 | Conda           | 0.67 | 0.78 | 0.88 | 7504  | 1293  | 0     |
| AGO | Angola | 4248 | Ebo             | 0.67 | 0.78 | 0.88 | 14225 | 2451  | 0     |
| AGO | Angola | 4249 | Libolo          | 0.67 | 0.78 | 0.88 | 13680 | 2357  | 0     |
| AGO | Angola | 4250 | Mussende        | 0.67 | 0.78 | 0.88 | 9233  | 1591  | 0     |
| AGO | Angola | 4251 | Porto Amboim    | 0.67 | 0.78 | 0.88 | 17352 | 2989  | 0     |
| AGO | Angola | 4252 | Quibala         | 0.67 | 0.78 | 0.88 | 18592 | 3203  | 0     |
| AGO | Angola | 4253 | Quilenda        | 0.67 | 0.78 | 0.88 | 8695  | 1498  | 0     |
| AGO | Angola | 4254 | Seles           | 0.67 | 0.78 | 0.88 | 22072 | 3802  | 0     |
| AGO | Angola | 4255 | Sumbe           | 0.67 | 0.78 | 0.88 | 26553 | 4574  | 0     |
| AGO | Angola | 4256 | Waku Kungu      | 0.67 | 0.78 | 0.88 | 16282 | 2805  | 0     |
| AGO | Angola | 4257 | Cahama          | 0.36 | 0.36 | 0.36 | 33218 | 33218 | 33218 |
| AGO | Angola | 4258 | Cuanhama        | 0.36 | 0.36 | 0.36 | 97138 | 97138 | 97138 |
| AGO | Angola | 4259 | Curoca          | 0.36 | 0.36 | 0.36 | 25908 | 25908 | 25908 |
| AGO | Angola | 4260 | Cuvelai         | 0.36 | 0.36 | 0.36 | 22692 | 22692 | 22692 |
| AGO | Angola | 4261 | Namacunde       | 0.36 | 0.36 | 0.36 | 68673 | 68673 | 68673 |
| AGO | Angola | 4262 | Ombadja         | 0.36 | 0.36 | 0.36 | 67885 | 67885 | 67885 |
| AGO | Angola | 4263 | Bailundo        | 0.67 | 0.78 | 0.88 | 7377  | 1271  | 0     |
| AGO | Angola | 4264 | Caala           | 0.67 | 0.78 | 0.88 | 52130 | 8981  | 0     |
| AGO | Angola | 4265 | Ekunha          | 0.67 | 0.78 | 0.88 | 11759 | 2026  | 0     |
| AGO | Angola | 4266 | Huambo          | 0.67 | 0.78 | 0.88 | 93033 | 16027 | 0     |
| AGO | Angola | 4267 | Katchiungo      | 0.67 | 0.78 | 0.88 | 9011  | 1552  | 0     |
| AGO | Angola | 4268 | Londuimbali     | 0.67 | 0.78 | 0.88 | 20728 | 3571  | 0     |
| AGO | Angola | 4269 | Longonjo        | 0.67 | 0.78 | 0.88 | 11686 | 2013  | 0     |

|     |        |      |                      |      |      |      |        |       |       |
|-----|--------|------|----------------------|------|------|------|--------|-------|-------|
| AGO | Angola | 4270 | Mungo                | 0.67 | 0.78 | 0.88 | 3945   | 680   | 0     |
| AGO | Angola | 4271 | Tchikala-tcholo.     | 0.67 | 0.78 | 0.88 | 9418   | 1622  | 0     |
| AGO | Angola | 4272 | Tchindjenje          | 0.67 | 0.78 | 0.88 | 1233   | 212   | 0     |
| AGO | Angola | 4273 | Ukuma                | 0.67 | 0.78 | 0.88 | 9332   | 1608  | 0     |
| AGO | Angola | 4274 | Caconda              | 0.67 | 0.78 | 0.88 | 33851  | 5832  | 0     |
| AGO | Angola | 4275 | Cacula               | 0.67 | 0.78 | 0.88 | 9339   | 1609  | 0     |
| AGO | Angola | 4276 | Caluquembe           | 0.67 | 0.78 | 0.88 | 44082  | 7594  | 0     |
| AGO | Angola | 4277 | Chibia               | 0.67 | 0.78 | 0.88 | 25317  | 4361  | 0     |
| AGO | Angola | 4278 | Chicomba             | 0.67 | 0.78 | 0.88 | 20410  | 3516  | 0     |
| AGO | Angola | 4279 | Chipindo             | 0.67 | 0.78 | 0.88 | 6120   | 1054  | 0     |
| AGO | Angola | 4280 | Gambos               | 0.67 | 0.78 | 0.88 | 9188   | 1583  | 0     |
| AGO | Angola | 4281 | Humpata              | 0.67 | 0.78 | 0.88 | 3339   | 575   | 0     |
| AGO | Angola | 4282 | Jamba                | 0.67 | 0.78 | 0.88 | 9162   | 1578  | 0     |
| AGO | Angola | 4283 | Kuvango              | 0.67 | 0.78 | 0.88 | 10356  | 1784  | 0     |
| AGO | Angola | 4284 | Lubango              | 0.67 | 0.78 | 0.88 | 65925  | 11357 | 0     |
| AGO | Angola | 4285 | Matala               | 0.67 | 0.78 | 0.88 | 25386  | 4373  | 0     |
| AGO | Angola | 4286 | Quilengues           | 0.67 | 0.78 | 0.88 | 20592  | 3547  | 0     |
| AGO | Angola | 4287 | Quipungo             | 0.67 | 0.78 | 0.88 | 14734  | 2538  | 0     |
| AGO | Angola | 4288 | Ambaca               | 0.36 | 0.36 | 0.36 | 23736  | 23736 | 23736 |
| AGO | Angola | 4289 | Banga                | 0.36 | 0.36 | 0.36 | 2984   | 2984  | 2984  |
| AGO | Angola | 4290 | Bolongongo           | 0.36 | 0.36 | 0.36 | 7370   | 7370  | 7370  |
| AGO | Angola | 4291 | Cambambe             | 0.36 | 0.36 | 0.36 | 17874  | 17874 | 17874 |
| AGO | Angola | 4292 | Cazengo (ndalatando) | 0.36 | 0.36 | 0.36 | 51782  | 51782 | 51782 |
| AGO | Angola | 4293 | Golungo Alto         | 0.36 | 0.36 | 0.36 | 13327  | 13327 | 13327 |
| AGO | Angola | 4294 | Gonguembo            | 0.36 | 0.36 | 0.36 | 7162   | 7162  | 7162  |
| AGO | Angola | 4295 | Lucala               | 0.36 | 0.36 | 0.36 | 7969   | 7969  | 7969  |
| AGO | Angola | 4296 | Quiculungo           | 0.36 | 0.36 | 0.36 | 5548   | 5548  | 5548  |
| AGO | Angola | 4297 | Samba Caju           | 0.36 | 0.36 | 0.36 | 18247  | 18247 | 18247 |
| AGO | Angola | 4298 | Cacuaco              | 0.77 | 0.88 | 0.98 | 23813  | 0     | 0     |
| AGO | Angola | 4299 | Luanda               | 0.77 | 0.88 | 0.98 | 103684 | 0     | 0     |
| AGO | Angola | 4300 | Viana                | 0.77 | 0.88 | 0.98 | 59230  | 0     | 0     |
| AGO | Angola | 4301 | Cambulo              | 0.36 | 0.36 | 0.36 | 40599  | 40599 | 40599 |
| AGO | Angola | 4302 | Capenda Camulemba    | 0.36 | 0.36 | 0.36 | 42152  | 42152 | 42152 |

|     |        |      |                  |      |      |      |        |        |        |
|-----|--------|------|------------------|------|------|------|--------|--------|--------|
| AGO | Angola | 4303 | Caungula         | 0.36 | 0.36 | 0.36 | 34050  | 34050  | 34050  |
| AGO | Angola | 4304 | Chitato          | 0.36 | 0.36 | 0.36 | 56571  | 56571  | 56571  |
| AGO | Angola | 4305 | Cuango           | 0.36 | 0.36 | 0.36 | 34232  | 34232  | 34232  |
| AGO | Angola | 4306 | Cuilo            | 0.36 | 0.36 | 0.36 | 15081  | 15081  | 15081  |
| AGO | Angola | 4307 | Lubalo           | 0.36 | 0.36 | 0.36 | 20666  | 20666  | 20666  |
| AGO | Angola | 4308 | Lucapa           | 0.36 | 0.36 | 0.36 | 44751  | 44751  | 44751  |
| AGO | Angola | 4309 | Xa-muteba        | 0.36 | 0.36 | 0.36 | 87652  | 87652  | 87652  |
| AGO | Angola | 4310 | Cacolo           | 0.36 | 0.36 | 0.36 | 25945  | 25945  | 25945  |
| AGO | Angola | 4311 | Dala             | 0.36 | 0.36 | 0.36 | 34475  | 34475  | 34475  |
| AGO | Angola | 4312 | Muconda          | 0.36 | 0.36 | 0.36 | 50320  | 50320  | 50320  |
| AGO | Angola | 4313 | Saurimo          | 0.36 | 0.36 | 0.36 | 83696  | 83696  | 83696  |
| AGO | Angola | 4314 | Cacuso           | 0.36 | 0.36 | 0.36 | 31382  | 31382  | 31382  |
| AGO | Angola | 4315 | Calandula        | 0.36 | 0.36 | 0.36 | 63145  | 63145  | 63145  |
| AGO | Angola | 4316 | Cambundi-catembo | 0.36 | 0.36 | 0.36 | 15536  | 15536  | 15536  |
| AGO | Angola | 4317 | Cangandala       | 0.36 | 0.36 | 0.36 | 10120  | 10120  | 10120  |
| AGO | Angola | 4318 | Caombo           | 0.36 | 0.36 | 0.36 | 17027  | 17027  | 17027  |
| AGO | Angola | 4319 | Kiwaba N'zogi    | 0.36 | 0.36 | 0.36 | 15144  | 15144  | 15144  |
| AGO | Angola | 4320 | Kunda Dia-baze   | 0.36 | 0.36 | 0.36 | 9677   | 9677   | 9677   |
| AGO | Angola | 4321 | Luquembo         | 0.36 | 0.36 | 0.36 | 10258  | 10258  | 10258  |
| AGO | Angola | 4322 | Malanje          | 0.36 | 0.36 | 0.36 | 135262 | 135262 | 135262 |
| AGO | Angola | 4323 | Marimba          | 0.36 | 0.36 | 0.36 | 9760   | 9760   | 9760   |
| AGO | Angola | 4324 | Massango         | 0.36 | 0.36 | 0.36 | 13004  | 13004  | 13004  |
| AGO | Angola | 4325 | Mucari           | 0.36 | 0.36 | 0.36 | 8493   | 8493   | 8493   |
| AGO | Angola | 4326 | Quela            | 0.36 | 0.36 | 0.36 | 24831  | 24831  | 24831  |
| AGO | Angola | 4327 | Quirima          | 0.36 | 0.36 | 0.36 | 11388  | 11388  | 11388  |
| AGO | Angola | 4328 | Alto Zambeze     | 0.36 | 0.36 | 0.36 | 14940  | 14940  | 14940  |
| AGO | Angola | 4329 | Camanongue       | 0.36 | 0.36 | 0.36 | 13262  | 13262  | 13262  |
| AGO | Angola | 4330 | Kameia Lumege    | 0.36 | 0.36 | 0.36 | 29267  | 29267  | 29267  |
| AGO | Angola | 4331 | Leua             | 0.36 | 0.36 | 0.36 | 22241  | 22241  | 22241  |
| AGO | Angola | 4332 | Luacano          | 0.36 | 0.36 | 0.36 | 21867  | 21867  | 21867  |
| AGO | Angola | 4333 | Luau             | 0.36 | 0.36 | 0.36 | 22573  | 22573  | 22573  |
| AGO | Angola | 4334 | Luchazes         | 0.36 | 0.36 | 0.36 | 17904  | 17904  | 17904  |
| AGO | Angola | 4335 | Luena (moxico)   | 0.36 | 0.36 | 0.36 | 131183 | 131183 | 131183 |

|     |           |      |                  |      |      |      |        |        |        |
|-----|-----------|------|------------------|------|------|------|--------|--------|--------|
| AGO | Angola    | 4336 | Lumbala N'guimbo | 0.36 | 0.36 | 0.36 | 2722   | 2722   | 2722   |
| AGO | Angola    | 4337 | Bibala           | 0.36 | 0.36 | 0.36 | 30126  | 30126  | 30126  |
| AGO | Angola    | 4338 | Camacuio         | 0.36 | 0.36 | 0.36 | 23922  | 23922  | 23922  |
| AGO | Angola    | 4339 | Namibe           | 0.36 | 0.36 | 0.36 | 103723 | 103723 | 103723 |
| AGO | Angola    | 4340 | Tombua           | 0.36 | 0.36 | 0.36 | 20733  | 20733  | 20733  |
| AGO | Angola    | 4341 | Virei            | 0.36 | 0.36 | 0.36 | 4953   | 4953   | 4953   |
| AGO | Angola    | 4342 | Alto Cauale      | 0.67 | 0.78 | 0.88 | 6163   | 1062   | 0      |
| AGO | Angola    | 4343 | Ambuila          | 0.67 | 0.78 | 0.88 | 1121   | 193    | 0      |
| AGO | Angola    | 4344 | Bembe            | 0.67 | 0.78 | 0.88 | 2988   | 515    | 0      |
| AGO | Angola    | 4345 | Buengas          | 0.67 | 0.78 | 0.88 | 4485   | 773    | 0      |
| AGO | Angola    | 4346 | Bungo            | 0.67 | 0.78 | 0.88 | 2723   | 469    | 0      |
| AGO | Angola    | 4347 | Damba            | 0.67 | 0.78 | 0.88 | 7701   | 1327   | 0      |
| AGO | Angola    | 4348 | Maquela Do Zombo | 0.67 | 0.78 | 0.88 | 15068  | 2596   | 0      |
| AGO | Angola    | 4349 | Mucaba           | 0.67 | 0.78 | 0.88 | 3228   | 556    | 0      |
| AGO | Angola    | 4350 | Negage           | 0.67 | 0.78 | 0.88 | 13281  | 2288   | 0      |
| AGO | Angola    | 4351 | Puri             | 0.67 | 0.78 | 0.88 | 31136  | 5364   | 0      |
| AGO | Angola    | 4352 | Quimbele         | 0.67 | 0.78 | 0.88 | 9295   | 1601   | 0      |
| AGO | Angola    | 4353 | Quitexe          | 0.67 | 0.78 | 0.88 | 1747   | 301    | 0      |
| AGO | Angola    | 4354 | Santa Cruz       | 0.67 | 0.78 | 0.88 | 4600   | 792    | 0      |
| AGO | Angola    | 4355 | Sanza Pombo      | 0.67 | 0.78 | 0.88 | 891    | 153    | 0      |
| AGO | Angola    | 4356 | Songo            | 0.67 | 0.78 | 0.88 | 28511  | 4912   | 0      |
| AGO | Angola    | 4357 | Songo/mucaba     | 0.67 | 0.78 | 0.88 | 4640   | 799    | 0      |
| AGO | Angola    | 4358 | Uige             | 0.67 | 0.78 | 0.88 | 17963  | 3095   | 0      |
| AGO | Angola    | 4359 | Cuimba           | 0.36 | 0.36 | 0.36 | 15430  | 15430  | 15430  |
| AGO | Angola    | 4360 | M'banza Congo    | 0.36 | 0.36 | 0.36 | 46149  | 46149  | 46149  |
| AGO | Angola    | 4361 | N'zeto           | 0.36 | 0.36 | 0.36 | 24604  | 24604  | 24604  |
| AGO | Angola    | 4362 | Noqui            | 0.36 | 0.36 | 0.36 | 26196  | 26196  | 26196  |
| AGO | Angola    | 4363 | Soyo             | 0.36 | 0.36 | 0.36 | 65570  | 65570  | 65570  |
| AGO | Angola    | 4364 | Tomboco          | 0.36 | 0.36 | 0.36 | 22875  | 22875  | 22875  |
| ARG | Argentina | 4531 | Bermejo          | 0.00 | 0.00 | 0.00 | 21489  | 21489  | 21489  |
| ARG | Argentina | 4595 | Beron De Astrada | 0.67 | 0.68 | 0.68 | 409    | 392    | 376    |
| ARG | Argentina | 4596 | Capital          | 0.67 | 0.68 | 0.68 | 47135  | 45200  | 43276  |
| ARG | Argentina | 4601 | Ganeral Paz      | 0.67 | 0.68 | 0.68 | 1951   | 1871   | 1792   |

|     |           |      |                         |      |      |      |        |        |        |
|-----|-----------|------|-------------------------|------|------|------|--------|--------|--------|
| ARG | Argentina | 4602 | General Alvear          | 0.67 | 0.68 | 0.68 | 1094   | 1049   | 1004   |
| ARG | Argentina | 4604 | Itati                   | 0.67 | 0.68 | 0.68 | 1106   | 1061   | 1015   |
| ARG | Argentina | 4605 | Ituzaingo               | 0.67 | 0.68 | 0.68 | 4751   | 4556   | 4362   |
| ARG | Argentina | 4607 | Mburucuy                | 0.67 | 0.68 | 0.68 | 1227   | 1176   | 1126   |
| ARG | Argentina | 4610 | Paso De Los Libres      | 0.67 | 0.68 | 0.68 | 6739   | 6462   | 6187   |
| ARG | Argentina | 4612 | San Cosme               | 0.67 | 0.68 | 0.68 | 2644   | 2536   | 2428   |
| ARG | Argentina | 4613 | San Luis Del Palmar     | 0.67 | 0.68 | 0.68 | 2705   | 2594   | 2483   |
| ARG | Argentina | 4614 | San Martin              | 0.67 | 0.68 | 0.68 | 1986   | 1905   | 1824   |
| ARG | Argentina | 4615 | San Miguel              | 0.67 | 0.68 | 0.68 | 1397   | 1340   | 1283   |
| ARG | Argentina | 4617 | Santo Tome              | 0.67 | 0.68 | 0.68 | 9034   | 8663   | 8294   |
| ARG | Argentina | 4636 | Bermejo                 | 0.00 | 0.00 | 0.00 | 12506  | 12506  | 12506  |
| ARG | Argentina | 4637 | Formosa                 | 0.00 | 0.00 | 0.00 | 202972 | 202972 | 202972 |
| ARG | Argentina | 4638 | Laishi                  | 0.00 | 0.00 | 0.00 | 15623  | 15623  | 15623  |
| ARG | Argentina | 4639 | Matacos                 | 0.00 | 0.00 | 0.00 | 12932  | 12932  | 12932  |
| ARG | Argentina | 4640 | Patino                  | 0.00 | 0.00 | 0.00 | 60522  | 60522  | 60522  |
| ARG | Argentina | 4641 | Pilagás                 | 0.00 | 0.00 | 0.00 | 14851  | 14851  | 14851  |
| ARG | Argentina | 4642 | Pilcomayo               | 0.00 | 0.00 | 0.00 | 75757  | 75757  | 75757  |
| ARG | Argentina | 4643 | Pirane                  | 0.00 | 0.00 | 0.00 | 52665  | 52665  | 52665  |
| ARG | Argentina | 4644 | Ramon Lista             | 0.00 | 0.00 | 0.00 | 12719  | 12719  | 12719  |
| ARG | Argentina | 4647 | El Carmen               | 0.00 | 0.00 | 0.00 | 81533  | 81533  | 81533  |
| ARG | Argentina | 4649 | Ledesma                 | 0.00 | 0.00 | 0.00 | 68002  | 68002  | 68002  |
| ARG | Argentina | 4650 | Palpala                 | 0.00 | 0.00 | 0.00 | 41917  | 41917  | 41917  |
| ARG | Argentina | 4653 | San Pedro               | 0.00 | 0.00 | 0.00 | 63490  | 63490  | 63490  |
| ARG | Argentina | 4654 | Santa Barbara           | 0.00 | 0.00 | 0.00 | 16013  | 16013  | 16013  |
| ARG | Argentina | 4659 | Valle Grande            | 0.00 | 0.00 | 0.00 | 4379   | 4379   | 4379   |
| ARG | Argentina | 4719 | 25 De Mayo              | 0.67 | 0.68 | 0.68 | 3724   | 3571   | 3419   |
| ARG | Argentina | 4720 | Apostoles               | 0.67 | 0.68 | 0.68 | 6189   | 5935   | 5683   |
| ARG | Argentina | 4721 | Cainguas                | 0.67 | 0.68 | 0.68 | 7593   | 7281   | 6971   |
| ARG | Argentina | 4722 | Candelaria              | 0.67 | 0.68 | 0.68 | 4281   | 4106   | 3931   |
| ARG | Argentina | 4723 | Capital                 | 0.67 | 0.68 | 0.68 | 46238  | 44340  | 42452  |
| ARG | Argentina | 4724 | Concepcion              | 0.67 | 0.68 | 0.68 | 1318   | 1264   | 1210   |
| ARG | Argentina | 4725 | Eldorado                | 0.67 | 0.68 | 0.68 | 11228  | 10767  | 10308  |
| ARG | Argentina | 4726 | General Manuel Belgrano | 0.67 | 0.68 | 0.68 | 10248  | 9828   | 9409   |



|     |           |       |                           |      |      |      |        |        |        |
|-----|-----------|-------|---------------------------|------|------|------|--------|--------|--------|
| ARG | Argentina | 4727  | Guarani                   | 0.67 | 0.68 | 0.68 | 9831   | 9427   | 9026   |
| ARG | Argentina | 4728  | Iguazu                    | 0.67 | 0.68 | 0.68 | 12318  | 11813  | 11310  |
| ARG | Argentina | 4729  | Leandro N. Alem           | 0.67 | 0.68 | 0.68 | 6378   | 6116   | 5855   |
| ARG | Argentina | 4730  | Libertador General San Ma | 0.67 | 0.68 | 0.68 | 6631   | 6359   | 6088   |
| ARG | Argentina | 4731  | Montecarlo                | 0.67 | 0.68 | 0.68 | 5188   | 4975   | 4763   |
| ARG | Argentina | 4732  | Obera                     | 0.67 | 0.68 | 0.68 | 15162  | 14540  | 13921  |
| ARG | Argentina | 4733  | San Ignacio               | 0.67 | 0.68 | 0.68 | 7949   | 7623   | 7298   |
| ARG | Argentina | 4734  | San Javier                | 0.67 | 0.68 | 0.68 | 2958   | 2836   | 2716   |
| ARG | Argentina | 4735  | San Pedro                 | 0.67 | 0.68 | 0.68 | 4886   | 4686   | 4486   |
| ARG | Argentina | 4765  | Anta                      | 0.00 | 0.00 | 0.00 | 50981  | 50981  | 50981  |
| ARG | Argentina | 4773  | General Jose De San Marti | 0.00 | 0.00 | 0.00 | 138642 | 138642 | 138642 |
| ARG | Argentina | 4781  | Oran                      | 0.00 | 0.00 | 0.00 | 121633 | 121633 | 121633 |
| ARG | Argentina | 4783  | Rivadavia                 | 0.00 | 0.00 | 0.00 | 29087  | 29087  | 29087  |
| BDI | Burundi   | 40559 | Bubanza                   | 0.00 | 0.00 | 0.00 | 90922  | 90922  | 90922  |
| BDI | Burundi   | 40561 | Mpanda                    | 0.00 | 0.00 | 0.00 | 62116  | 62116  | 62116  |
| BDI | Burundi   | 40562 | Musigati                  | 0.00 | 0.00 | 0.00 | 92505  | 92505  | 92505  |
| BDI | Burundi   | 40563 | Rugazi                    | 0.00 | 0.00 | 0.00 | 65156  | 65156  | 65156  |
| BDI | Burundi   | 40564 | Admin unit not available  | 0.00 | 0.00 | 0.00 | 2080   | 2080   | 2080   |
| BDI | Burundi   | 40565 | Buterere                  | 0.00 | 0.00 | 0.00 | 33645  | 33645  | 33645  |
| BDI | Burundi   | 40566 | Buyenzi                   | 0.00 | 0.00 | 0.00 | 34941  | 34941  | 34941  |
| BDI | Burundi   | 40567 | Bwiza                     | 0.00 | 0.00 | 0.00 | 44921  | 44921  | 44921  |
| BDI | Burundi   | 40568 | Cibitoke                  | 0.00 | 0.00 | 0.00 | 42374  | 42374  | 42374  |
| BDI | Burundi   | 40569 | Gihosha                   | 0.00 | 0.00 | 0.00 | 80334  | 80334  | 80334  |
| BDI | Burundi   | 40570 | Kamenge                   | 0.00 | 0.00 | 0.00 | 60225  | 60225  | 60225  |
| BDI | Burundi   | 40571 | Kanyosha                  | 0.00 | 0.00 | 0.00 | 92669  | 92669  | 92669  |
| BDI | Burundi   | 40572 | Kinama                    | 0.00 | 0.00 | 0.00 | 67132  | 67132  | 67132  |
| BDI | Burundi   | 40573 | Kinindo                   | 0.00 | 0.00 | 0.00 | 22937  | 22937  | 22937  |
| BDI | Burundi   | 40574 | Musaga                    | 0.00 | 0.00 | 0.00 | 57765  | 57765  | 57765  |
| BDI | Burundi   | 40575 | Ngagara                   | 0.00 | 0.00 | 0.00 | 44834  | 44834  | 44834  |
| BDI | Burundi   | 40576 | Nyakabiga                 | 0.00 | 0.00 | 0.00 | 27046  | 27046  | 27046  |
| BDI | Burundi   | 40577 | Rohero                    | 0.00 | 0.00 | 0.00 | 46076  | 46076  | 46076  |
| BDI | Burundi   | 40578 | Admin unit not available  | 0.00 | 0.00 | 0.00 | 3387   | 3387   | 3387   |
| BDI | Burundi   | 40579 | Admin unit not available  | 0.00 | 0.00 | 0.00 | 2749   | 2749   | 2749   |

|     |         |       |                          |      |      |      |        |        |        |
|-----|---------|-------|--------------------------|------|------|------|--------|--------|--------|
| BDI | Burundi | 40580 | Bugarama                 | 0.00 | 0.00 | 0.00 | 29887  | 29887  | 29887  |
| BDI | Burundi | 40581 | Isare                    | 0.00 | 0.00 | 0.00 | 89725  | 89725  | 89725  |
| BDI | Burundi | 40582 | Kabezi                   | 0.00 | 0.00 | 0.00 | 51872  | 51872  | 51872  |
| BDI | Burundi | 40584 | Mubimbi                  | 0.00 | 0.00 | 0.00 | 43650  | 43650  | 43650  |
| BDI | Burundi | 40586 | Muhuta                   | 0.00 | 0.00 | 0.00 | 65542  | 65542  | 65542  |
| BDI | Burundi | 40589 | Mutimbuzi                | 0.00 | 0.00 | 0.00 | 73931  | 73931  | 73931  |
| BDI | Burundi | 40590 | Admin unit not available | 0.00 | 0.00 | 0.00 | 5574   | 5574   | 5574   |
| BDI | Burundi | 40591 | Burambi                  | 0.00 | 0.00 | 0.00 | 61653  | 61653  | 61653  |
| BDI | Burundi | 40592 | Bururi                   | 0.00 | 0.00 | 0.00 | 93259  | 93259  | 93259  |
| BDI | Burundi | 40593 | Buyengero                | 0.00 | 0.00 | 0.00 | 62649  | 62649  | 62649  |
| BDI | Burundi | 40594 | Matana                   | 0.00 | 0.00 | 0.00 | 47437  | 47437  | 47437  |
| BDI | Burundi | 40595 | Mugamba                  | 0.00 | 0.00 | 0.00 | 65932  | 65932  | 65932  |
| BDI | Burundi | 40596 | Rumonge                  | 0.00 | 0.00 | 0.00 | 151720 | 151720 | 151720 |
| BDI | Burundi | 40597 | Rutovu                   | 0.00 | 0.00 | 0.00 | 50528  | 50528  | 50528  |
| BDI | Burundi | 40598 | Songa                    | 0.00 | 0.00 | 0.00 | 58719  | 58719  | 58719  |
| BDI | Burundi | 40599 | Vyanda                   | 0.00 | 0.00 | 0.00 | 32959  | 32959  | 32959  |
| BDI | Burundi | 40600 | Cankuzo                  | 0.00 | 0.00 | 0.00 | 54804  | 54804  | 54804  |
| BDI | Burundi | 40601 | Cendajuru                | 0.00 | 0.00 | 0.00 | 35779  | 35779  | 35779  |
| BDI | Burundi | 40602 | Gisagara                 | 0.00 | 0.00 | 0.00 | 60179  | 60179  | 60179  |
| BDI | Burundi | 40603 | Kigamba                  | 0.00 | 0.00 | 0.00 | 43114  | 43114  | 43114  |
| BDI | Burundi | 40604 | Mishiha                  | 0.00 | 0.00 | 0.00 | 48653  | 48653  | 48653  |
| BDI | Burundi | 40605 | Buganda                  | 0.00 | 0.00 | 0.00 | 74255  | 74255  | 74255  |
| BDI | Burundi | 40606 | Bukinanvana              | 0.00 | 0.00 | 0.00 | 83053  | 83053  | 83053  |
| BDI | Burundi | 40607 | Mabayi                   | 0.00 | 0.00 | 0.00 | 74485  | 74485  | 74485  |
| BDI | Burundi | 40608 | Mugina                   | 0.00 | 0.00 | 0.00 | 92446  | 92446  | 92446  |
| BDI | Burundi | 40609 | Murwi                    | 0.00 | 0.00 | 0.00 | 90707  | 90707  | 90707  |
| BDI | Burundi | 40610 | Rugombo                  | 0.00 | 0.00 | 0.00 | 82213  | 82213  | 82213  |
| BDI | Burundi | 40611 | Bugendana                | 0.00 | 0.00 | 0.00 | 117834 | 117834 | 117834 |
| BDI | Burundi | 40612 | Bukirasazi               | 0.00 | 0.00 | 0.00 | 33872  | 33872  | 33872  |
| BDI | Burundi | 40613 | Buraza                   | 0.00 | 0.00 | 0.00 | 53011  | 53011  | 53011  |
| BDI | Burundi | 40614 | Giheta                   | 0.00 | 0.00 | 0.00 | 79970  | 79970  | 79970  |
| BDI | Burundi | 40615 | Gishubi                  | 0.00 | 0.00 | 0.00 | 63907  | 63907  | 63907  |
| BDI | Burundi | 40616 | Gitega                   | 0.00 | 0.00 | 0.00 | 178673 | 178673 | 178673 |

|     |         |       |                          |      |      |      |        |        |        |
|-----|---------|-------|--------------------------|------|------|------|--------|--------|--------|
| BDI | Burundi | 40617 | Itaba                    | 0.00 | 0.00 | 0.00 | 58417  | 58417  | 58417  |
| BDI | Burundi | 40618 | Makebukoko               | 0.00 | 0.00 | 0.00 | 66926  | 66926  | 66926  |
| BDI | Burundi | 40619 | Mutaho                   | 0.00 | 0.00 | 0.00 | 69931  | 69931  | 69931  |
| BDI | Burundi | 40620 | Nyarusange               | 0.00 | 0.00 | 0.00 | 117919 | 117919 | 117919 |
| BDI | Burundi | 40621 | Ryansoro                 | 0.00 | 0.00 | 0.00 | 38526  | 38526  | 38526  |
| BDI | Burundi | 40622 | Bugenyuzi                | 0.00 | 0.00 | 0.00 | 88744  | 88744  | 88744  |
| BDI | Burundi | 40623 | Buhiga                   | 0.00 | 0.00 | 0.00 | 61439  | 61439  | 61439  |
| BDI | Burundi | 40624 | Gihogazi                 | 0.00 | 0.00 | 0.00 | 75273  | 75273  | 75273  |
| BDI | Burundi | 40625 | Gitaramuka               | 0.00 | 0.00 | 0.00 | 85399  | 85399  | 85399  |
| BDI | Burundi | 40626 | Mutumba                  | 0.00 | 0.00 | 0.00 | 45249  | 45249  | 45249  |
| BDI | Burundi | 40627 | Nyabikere                | 0.00 | 0.00 | 0.00 | 54307  | 54307  | 54307  |
| BDI | Burundi | 40628 | Shombo                   | 0.00 | 0.00 | 0.00 | 54082  | 54082  | 54082  |
| BDI | Burundi | 40629 | Butaganzwal              | 0.00 | 0.00 | 0.00 | 56805  | 56805  | 56805  |
| BDI | Burundi | 40630 | Gahombo                  | 0.00 | 0.00 | 0.00 | 44324  | 44324  | 44324  |
| BDI | Burundi | 40631 | Gatara                   | 0.00 | 0.00 | 0.00 | 71719  | 71719  | 71719  |
| BDI | Burundi | 40632 | Kabarore                 | 0.00 | 0.00 | 0.00 | 62045  | 62045  | 62045  |
| BDI | Burundi | 40633 | Kayanza                  | 0.00 | 0.00 | 0.00 | 106240 | 106240 | 106240 |
| BDI | Burundi | 40634 | Matongo                  | 0.00 | 0.00 | 0.00 | 75411  | 75411  | 75411  |
| BDI | Burundi | 40635 | Muhanga                  | 0.00 | 0.00 | 0.00 | 70089  | 70089  | 70089  |
| BDI | Burundi | 40636 | Muruta                   | 0.00 | 0.00 | 0.00 | 61860  | 61860  | 61860  |
| BDI | Burundi | 40637 | Rango                    | 0.00 | 0.00 | 0.00 | 87782  | 87782  | 87782  |
| BDI | Burundi | 40638 | Bugabira                 | 0.00 | 0.00 | 0.00 | 96432  | 96432  | 96432  |
| BDI | Burundi | 40639 | Busoni                   | 0.00 | 0.00 | 0.00 | 153565 | 153565 | 153565 |
| BDI | Burundi | 40640 | Bwambarangwe             | 0.00 | 0.00 | 0.00 | 70925  | 70925  | 70925  |
| BDI | Burundi | 40641 | Gitobe                   | 0.00 | 0.00 | 0.00 | 66389  | 66389  | 66389  |
| BDI | Burundi | 40642 | Kirundo                  | 0.00 | 0.00 | 0.00 | 104023 | 104023 | 104023 |
| BDI | Burundi | 40643 | Ntega                    | 0.00 | 0.00 | 0.00 | 105745 | 105745 | 105745 |
| BDI | Burundi | 40644 | Vumbi                    | 0.00 | 0.00 | 0.00 | 82466  | 82466  | 82466  |
| BDI | Burundi | 40645 | Admin unit not available | 0.00 | 0.00 | 0.00 | 484    | 484    | 484    |
| BDI | Burundi | 40646 | Kayogoro                 | 0.00 | 0.00 | 0.00 | 95926  | 95926  | 95926  |
| BDI | Burundi | 40647 | Kibago                   | 0.00 | 0.00 | 0.00 | 49178  | 49178  | 49178  |
| BDI | Burundi | 40648 | Mabanda                  | 0.00 | 0.00 | 0.00 | 48861  | 48861  | 48861  |
| BDI | Burundi | 40649 | Makamba                  | 0.00 | 0.00 | 0.00 | 107679 | 107679 | 107679 |

|     |         |       |               |      |      |      |        |        |        |
|-----|---------|-------|---------------|------|------|------|--------|--------|--------|
| BDI | Burundi | 40650 | Nyanza Lac    | 0.00 | 0.00 | 0.00 | 45231  | 45231  | 45231  |
| BDI | Burundi | 40651 | Vugizo        | 0.00 | 0.00 | 0.00 | 48992  | 48992  | 48992  |
| BDI | Burundi | 40652 | Bukeye        | 0.00 | 0.00 | 0.00 | 71538  | 71538  | 71538  |
| BDI | Burundi | 40653 | Kiganda       | 0.00 | 0.00 | 0.00 | 53063  | 53063  | 53063  |
| BDI | Burundi | 40654 | Mbuye         | 0.00 | 0.00 | 0.00 | 59870  | 59870  | 59870  |
| BDI | Burundi | 40655 | Muramviya     | 0.00 | 0.00 | 0.00 | 91170  | 91170  | 91170  |
| BDI | Burundi | 40656 | Rutegama      | 0.00 | 0.00 | 0.00 | 46103  | 46103  | 46103  |
| BDI | Burundi | 40657 | Buhinvuza     | 0.00 | 0.00 | 0.00 | 78896  | 78896  | 78896  |
| BDI | Burundi | 40658 | Butihinda     | 0.00 | 0.00 | 0.00 | 106550 | 106550 | 106550 |
| BDI | Burundi | 40659 | Gashoho       | 0.00 | 0.00 | 0.00 | 72068  | 72068  | 72068  |
| BDI | Burundi | 40660 | Gasorwe       | 0.00 | 0.00 | 0.00 | 85702  | 85702  | 85702  |
| BDI | Burundi | 40661 | Giteranyi     | 0.00 | 0.00 | 0.00 | 154107 | 154107 | 154107 |
| BDI | Burundi | 40662 | Muyinga       | 0.00 | 0.00 | 0.00 | 155545 | 155545 | 155545 |
| BDI | Burundi | 40663 | Mwakiro       | 0.00 | 0.00 | 0.00 | 47647  | 47647  | 47647  |
| BDI | Burundi | 40664 | Bisoro        | 0.00 | 0.00 | 0.00 | 38641  | 38641  | 38641  |
| BDI | Burundi | 40665 | Gisozi        | 0.00 | 0.00 | 0.00 | 31224  | 31224  | 31224  |
| BDI | Burundi | 40666 | Kayokwe       | 0.00 | 0.00 | 0.00 | 53502  | 53502  | 53502  |
| BDI | Burundi | 40667 | Ndava         | 0.00 | 0.00 | 0.00 | 62649  | 62649  | 62649  |
| BDI | Burundi | 40668 | Nyabihanga    | 0.00 | 0.00 | 0.00 | 65750  | 65750  | 65750  |
| BDI | Burundi | 40669 | Rusaka        | 0.00 | 0.00 | 0.00 | 49731  | 49731  | 49731  |
| BDI | Burundi | 40670 | Busiga        | 0.00 | 0.00 | 0.00 | 67232  | 67232  | 67232  |
| BDI | Burundi | 40671 | Gashikanwa    | 0.00 | 0.00 | 0.00 | 64747  | 64747  | 64747  |
| BDI | Burundi | 40672 | Kirembe       | 0.00 | 0.00 | 0.00 | 102909 | 102909 | 102909 |
| BDI | Burundi | 40673 | Marangara     | 0.00 | 0.00 | 0.00 | 72453  | 72453  | 72453  |
| BDI | Burundi | 40674 | Mwumba        | 0.00 | 0.00 | 0.00 | 62797  | 62797  | 62797  |
| BDI | Burundi | 40675 | Ngozi         | 0.00 | 0.00 | 0.00 | 148943 | 148943 | 148943 |
| BDI | Burundi | 40676 | Nvamurenza    | 0.00 | 0.00 | 0.00 | 59754  | 59754  | 59754  |
| BDI | Burundi | 40677 | Ruhororo      | 0.00 | 0.00 | 0.00 | 69604  | 69604  | 69604  |
| BDI | Burundi | 40678 | Tangara       | 0.00 | 0.00 | 0.00 | 84237  | 84237  | 84237  |
| BDI | Burundi | 40679 | Bukemba       | 0.00 | 0.00 | 0.00 | 39177  | 39177  | 39177  |
| BDI | Burundi | 40680 | Giharo        | 0.00 | 0.00 | 0.00 | 102436 | 102436 | 102436 |
| BDI | Burundi | 40681 | Gitanga       | 0.00 | 0.00 | 0.00 | 49137  | 49137  | 49137  |
| BDI | Burundi | 40682 | Mpinga-Kayove | 0.00 | 0.00 | 0.00 | 59693  | 59693  | 59693  |

|     |         |       |               |      |      |      |        |        |        |
|-----|---------|-------|---------------|------|------|------|--------|--------|--------|
| BDI | Burundi | 40683 | Musongati     | 0.00 | 0.00 | 0.00 | 57345  | 57345  | 57345  |
| BDI | Burundi | 40684 | Rutana        | 0.00 | 0.00 | 0.00 | 60839  | 60839  | 60839  |
| BDI | Burundi | 40685 | Butaganzwa    | 0.00 | 0.00 | 0.00 | 67907  | 67907  | 67907  |
| BDI | Burundi | 40686 | Butezi        | 0.00 | 0.00 | 0.00 | 43649  | 43649  | 43649  |
| BDI | Burundi | 40687 | Bweru         | 0.00 | 0.00 | 0.00 | 42075  | 42075  | 42075  |
| BDI | Burundi | 40688 | Gisuru        | 0.00 | 0.00 | 0.00 | 109256 | 109256 | 109256 |
| BDI | Burundi | 40689 | Kinyinya      | 0.00 | 0.00 | 0.00 | 56211  | 56211  | 56211  |
| BDI | Burundi | 40690 | Nyabitsinda   | 0.00 | 0.00 | 0.00 | 57386  | 57386  | 57386  |
| BDI | Burundi | 40691 | Ruyigi        | 0.00 | 0.00 | 0.00 | 64801  | 64801  | 64801  |
| BDI | Burundi | 40753 | Kanyosha      | 0.00 | 0.00 | 0.00 | 72611  | 72611  | 72611  |
| BDI | Burundi | 40754 | Mugongomanga  | 0.00 | 0.00 | 0.00 | 32627  | 32627  | 32627  |
| BDI | Burundi | 40755 | Mukike        | 0.00 | 0.00 | 0.00 | 28171  | 28171  | 28171  |
| BDI | Burundi | 40756 | Mutambu       | 0.00 | 0.00 | 0.00 | 49683  | 49683  | 49683  |
| BDI | Burundi | 40757 | Nyabiraba     | 0.00 | 0.00 | 0.00 | 54638  | 54638  | 54638  |
| BDI | Burundi | 48356 | Gihanga       | 0.00 | 0.00 | 0.00 | 59192  | 59192  | 59192  |
| BEN | Benin   | 5861  | Banikoara     | 0.30 | 0.31 | 0.32 | 123063 | 119586 | 118236 |
| BEN | Benin   | 5862  | Gogounou      | 0.30 | 0.31 | 0.32 | 63204  | 61419  | 60725  |
| BEN | Benin   | 5863  | Kandi         | 0.30 | 0.31 | 0.32 | 81547  | 79244  | 78349  |
| BEN | Benin   | 5864  | Karimama      | 0.30 | 0.31 | 0.32 | 31384  | 30497  | 30153  |
| BEN | Benin   | 5865  | Malanville    | 0.30 | 0.31 | 0.32 | 86439  | 83997  | 83049  |
| BEN | Benin   | 5866  | Segbana       | 0.30 | 0.31 | 0.32 | 44138  | 42891  | 42407  |
| BEN | Benin   | 5867  | Boukoumbe     | 0.72 | 0.73 | 0.79 | 7590   | 6128   | 573    |
| BEN | Benin   | 5868  | Kerou         | 0.72 | 0.73 | 0.79 | 7955   | 6423   | 600    |
| BEN | Benin   | 5869  | Kobli         | 0.72 | 0.73 | 0.79 | 5876   | 4745   | 444    |
| BEN | Benin   | 5870  | Kouande       | 0.72 | 0.73 | 0.79 | 10176  | 8216   | 768    |
| BEN | Benin   | 5871  | Materi        | 0.72 | 0.73 | 0.79 | 10551  | 8519   | 796    |
| BEN | Benin   | 5872  | Natitingou    | 0.72 | 0.73 | 0.79 | 12001  | 9690   | 906    |
| BEN | Benin   | 5873  | Pehonko       | 0.72 | 0.73 | 0.79 | 7050   | 5693   | 532    |
| BEN | Benin   | 5874  | Tanguieta     | 0.72 | 0.73 | 0.79 | 7607   | 6142   | 574    |
| BEN | Benin   | 5875  | Toukountouna  | 0.72 | 0.73 | 0.79 | 3766   | 3041   | 284    |
| BEN | Benin   | 5876  | Abomey-calavi | 0.30 | 0.31 | 0.32 | 303797 | 295214 | 291881 |
| BEN | Benin   | 5877  | Allada        | 0.30 | 0.31 | 0.32 | 77438  | 75250  | 74401  |
| BEN | Benin   | 5878  | Kpomasse      | 0.30 | 0.31 | 0.32 | 46623  | 45306  | 44795  |

|     |       |      |              |      |      |      |        |        |        |
|-----|-------|------|--------------|------|------|------|--------|--------|--------|
| BEN | Benin | 5879 | Ouidah       | 0.30 | 0.31 | 0.32 | 69387  | 67427  | 66666  |
| BEN | Benin | 5880 | So-ava       | 0.30 | 0.31 | 0.32 | 57375  | 55754  | 55124  |
| BEN | Benin | 5881 | Toffo        | 0.30 | 0.31 | 0.32 | 60597  | 58885  | 58221  |
| BEN | Benin | 5882 | Tori-bossito | 0.30 | 0.31 | 0.32 | 36973  | 35929  | 35523  |
| BEN | Benin | 5883 | Ze           | 0.30 | 0.31 | 0.32 | 59441  | 57762  | 57110  |
| BEN | Benin | 5884 | Bembereke    | 0.72 | 0.73 | 0.77 | 12998  | 11085  | 4350   |
| BEN | Benin | 5885 | Kalale       | 0.72 | 0.73 | 0.77 | 13002  | 11088  | 4351   |
| BEN | Benin | 5886 | Ndali        | 0.72 | 0.73 | 0.77 | 9279   | 7913   | 3105   |
| BEN | Benin | 5887 | Nikki        | 0.72 | 0.73 | 0.77 | 14159  | 12074  | 4738   |
| BEN | Benin | 5888 | Parakou      | 0.72 | 0.73 | 0.77 | 23719  | 20227  | 7938   |
| BEN | Benin | 5889 | Perere       | 0.72 | 0.73 | 0.77 | 5573   | 4752   | 1865   |
| BEN | Benin | 5890 | Sinende      | 0.72 | 0.73 | 0.77 | 8260   | 7044   | 2764   |
| BEN | Benin | 5891 | Tchaourou    | 0.72 | 0.73 | 0.77 | 14954  | 12753  | 5004   |
| BEN | Benin | 5892 | Bante        | 0.30 | 0.31 | 0.32 | 63323  | 61534  | 60840  |
| BEN | Benin | 5893 | Dassa        | 0.30 | 0.31 | 0.32 | 76620  | 74456  | 73615  |
| BEN | Benin | 5894 | Glazoue      | 0.30 | 0.31 | 0.32 | 69446  | 67484  | 66723  |
| BEN | Benin | 5895 | Ouesse       | 0.30 | 0.31 | 0.32 | 74620  | 72511  | 71693  |
| BEN | Benin | 5896 | Savalou      | 0.30 | 0.31 | 0.32 | 86353  | 83913  | 82966  |
| BEN | Benin | 5897 | Save         | 0.30 | 0.31 | 0.32 | 63888  | 62083  | 61382  |
| BEN | Benin | 5898 | Aplahoue     | 0.30 | 0.31 | 0.32 | 94942  | 92260  | 91218  |
| BEN | Benin | 5899 | Djakotome    | 0.30 | 0.31 | 0.32 | 72831  | 70773  | 69974  |
| BEN | Benin | 5900 | Dogbo-tota   | 0.30 | 0.31 | 0.32 | 67772  | 65857  | 65114  |
| BEN | Benin | 5901 | Klouekanme   | 0.30 | 0.31 | 0.32 | 72747  | 70692  | 69894  |
| BEN | Benin | 5902 | Lalo         | 0.30 | 0.31 | 0.32 | 63017  | 61237  | 60546  |
| BEN | Benin | 5903 | Toviklin     | 0.30 | 0.31 | 0.32 | 47947  | 46593  | 46067  |
| BEN | Benin | 5904 | Bassila      | 0.30 | 0.31 | 0.32 | 58552  | 56898  | 56256  |
| BEN | Benin | 5905 | Djougou      | 0.30 | 0.31 | 0.32 | 149936 | 145700 | 144055 |
| BEN | Benin | 5906 | Kopargo      | 0.30 | 0.31 | 0.32 | 37967  | 36895  | 36478  |
| BEN | Benin | 5907 | Ouake        | 0.30 | 0.31 | 0.32 | 34280  | 33312  | 32936  |
| BEN | Benin | 5908 | Cotonou      | 0.30 | 0.31 | 0.32 | 588402 | 571779 | 565324 |
| BEN | Benin | 5909 | Athieme      | 0.30 | 0.31 | 0.32 | 29055  | 28234  | 27915  |
| BEN | Benin | 5910 | Bopa         | 0.30 | 0.31 | 0.32 | 52643  | 51156  | 50579  |
| BEN | Benin | 5911 | Come         | 0.30 | 0.31 | 0.32 | 48528  | 47157  | 46625  |

|     |              |       |                 |      |      |      |        |        |        |
|-----|--------------|-------|-----------------|------|------|------|--------|--------|--------|
| BEN | Benin        | 5912  | Grand-popo      | 0.30 | 0.31 | 0.32 | 27688  | 26906  | 26602  |
| BEN | Benin        | 5913  | Houeyogbe       | 0.30 | 0.31 | 0.32 | 54021  | 52495  | 51902  |
| BEN | Benin        | 5914  | Lokossa         | 0.30 | 0.31 | 0.32 | 62897  | 61120  | 60430  |
| BEN | Benin        | 5915  | Adjara          | 0.30 | 0.31 | 0.32 | 60081  | 58383  | 57724  |
| BEN | Benin        | 5916  | Adjohoun        | 0.30 | 0.31 | 0.32 | 42958  | 41745  | 41274  |
| BEN | Benin        | 5917  | Aguegue         | 0.30 | 0.31 | 0.32 | 20927  | 20336  | 20106  |
| BEN | Benin        | 5918  | Akpro-misserete | 0.30 | 0.31 | 0.32 | 55416  | 53851  | 53243  |
| BEN | Benin        | 5919  | Avrankou        | 0.30 | 0.31 | 0.32 | 59519  | 57837  | 57184  |
| BEN | Benin        | 5920  | Bonou           | 0.30 | 0.31 | 0.32 | 22495  | 21860  | 21613  |
| BEN | Benin        | 5921  | Dangbo          | 0.30 | 0.31 | 0.32 | 52737  | 51247  | 50669  |
| BEN | Benin        | 5922  | Porto-novo      | 0.30 | 0.31 | 0.32 | 220514 | 214284 | 211865 |
| BEN | Benin        | 5923  | Seme-kpodji     | 0.30 | 0.31 | 0.32 | 114540 | 111304 | 110048 |
| BEN | Benin        | 5924  | Adja-ouere      | 0.30 | 0.31 | 0.32 | 60796  | 59079  | 58412  |
| BEN | Benin        | 5925  | Ifangni         | 0.30 | 0.31 | 0.32 | 53150  | 51649  | 51066  |
| BEN | Benin        | 5926  | Ketou           | 0.30 | 0.31 | 0.32 | 78321  | 76108  | 75249  |
| BEN | Benin        | 5927  | Pobe            | 0.30 | 0.31 | 0.32 | 68260  | 66331  | 65583  |
| BEN | Benin        | 5928  | Sakete          | 0.30 | 0.31 | 0.32 | 59802  | 58113  | 57457  |
| BEN | Benin        | 5929  | Abomey          | 0.30 | 0.31 | 0.32 | 70483  | 68492  | 67719  |
| BEN | Benin        | 5930  | Agbangnizoun    | 0.30 | 0.31 | 0.32 | 40712  | 39562  | 39115  |
| BEN | Benin        | 5931  | Bohicon         | 0.30 | 0.31 | 0.32 | 98222  | 95447  | 94370  |
| BEN | Benin        | 5932  | Cove            | 0.30 | 0.31 | 0.32 | 29629  | 28792  | 28467  |
| BEN | Benin        | 5933  | Djidja          | 0.30 | 0.31 | 0.32 | 63351  | 61561  | 60866  |
| BEN | Benin        | 5934  | Ouinhi          | 0.30 | 0.31 | 0.32 | 28557  | 27750  | 27437  |
| BEN | Benin        | 5935  | Za-kpota        | 0.30 | 0.31 | 0.32 | 64101  | 62290  | 61587  |
| BEN | Benin        | 5936  | Zangnanado      | 0.30 | 0.31 | 0.32 | 27277  | 26507  | 26208  |
| BEN | Benin        | 5937  | Zogbodome       | 0.30 | 0.31 | 0.32 | 54451  | 52913  | 52315  |
| BFA | Burkina Faso | 12111 | Bam             | 0.51 | 0.52 | 0.53 | 98036  | 94077  | 92526  |
| BFA | Burkina Faso | 12112 | Banwa           | 0.67 | 0.74 | 0.80 | 44954  | 20806  | 0      |
| BFA | Burkina Faso | 12113 | Bazega          | 0.51 | 0.52 | 0.53 | 83203  | 79843  | 78527  |
| BFA | Burkina Faso | 12114 | Bougouriba      | 0.51 | 0.52 | 0.53 | 37358  | 35850  | 35259  |
| BFA | Burkina Faso | 12115 | Boulgou         | 0.51 | 0.52 | 0.53 | 212644 | 204057 | 200693 |
| BFA | Burkina Faso | 12116 | Boulkiemde      | 0.51 | 0.52 | 0.53 | 192499 | 184726 | 181680 |
| BFA | Burkina Faso | 12117 | Comoe           | 0.58 | 0.63 | 0.69 | 121256 | 93032  | 63166  |

|     |              |       |            |      |      |      |        |        |        |
|-----|--------------|-------|------------|------|------|------|--------|--------|--------|
| BFA | Burkina Faso | 12118 | Ganzourgou | 0.51 | 0.52 | 0.53 | 112510 | 107967 | 106187 |
| BFA | Burkina Faso | 12119 | Gnagna     | 0.51 | 0.52 | 0.53 | 143574 | 137776 | 135505 |
| BFA | Burkina Faso | 12120 | Gourma     | 0.51 | 0.52 | 0.53 | 111412 | 106913 | 105150 |
| BFA | Burkina Faso | 12121 | Houet      | 0.67 | 0.74 | 0.80 | 178593 | 82658  | 0      |
| BFA | Burkina Faso | 12122 | Ioba       | 0.51 | 0.52 | 0.53 | 70405  | 67562  | 66448  |
| BFA | Burkina Faso | 12123 | Kadiogo    | 0.72 | 0.72 | 0.72 | 237707 | 233512 | 231577 |
| BFA | Burkina Faso | 12124 | Kenedougou | 0.51 | 0.52 | 0.53 | 96410  | 92516  | 90991  |
| BFA | Burkina Faso | 12125 | Komondjari | 0.51 | 0.52 | 0.53 | 29514  | 28322  | 27856  |
| BFA | Burkina Faso | 12126 | Kompienga  | 0.51 | 0.52 | 0.53 | 25857  | 24813  | 24404  |
| BFA | Burkina Faso | 12127 | Kossi      | 0.67 | 0.74 | 0.80 | 43978  | 20354  | 0      |
| BFA | Burkina Faso | 12128 | Koulpelogo | 0.51 | 0.52 | 0.53 | 88107  | 84549  | 83156  |
| BFA | Burkina Faso | 12129 | Kouritenga | 0.51 | 0.52 | 0.53 | 127663 | 122508 | 120489 |
| BFA | Burkina Faso | 12130 | Kourweogo  | 0.51 | 0.52 | 0.53 | 51531  | 49450  | 48635  |
| BFA | Burkina Faso | 12131 | Leraba     | 0.55 | 0.58 | 0.61 | 38999  | 34117  | 29864  |
| BFA | Burkina Faso | 12132 | Bale       | 0.51 | 0.52 | 0.53 | 80914  | 77647  | 76367  |
| BFA | Burkina Faso | 12133 | Loroum     | 0.51 | 0.52 | 0.53 | 48389  | 46435  | 45669  |
| BFA | Burkina Faso | 12134 | Mouhoun    | 0.51 | 0.52 | 0.53 | 115056 | 110409 | 108589 |
| BFA | Burkina Faso | 12135 | Nahouri    | 0.51 | 0.52 | 0.53 | 61194  | 58723  | 57755  |
| BFA | Burkina Faso | 12136 | Namentenga | 0.51 | 0.52 | 0.53 | 114273 | 109658 | 107850 |
| BFA | Burkina Faso | 12137 | Nayala     | 0.51 | 0.52 | 0.53 | 58164  | 55815  | 54895  |
| BFA | Burkina Faso | 12138 | Noumbiel   | 0.74 | 0.82 | 0.92 | 5207   | 0      | 0      |
| BFA | Burkina Faso | 12139 | Oubritenga | 0.51 | 0.52 | 0.53 | 83044  | 79690  | 78376  |
| BFA | Burkina Faso | 12140 | Oudalan    | 0.51 | 0.52 | 0.53 | 67546  | 64819  | 63750  |
| BFA | Burkina Faso | 12141 | Passore    | 0.51 | 0.52 | 0.53 | 116499 | 111795 | 109952 |
| BFA | Burkina Faso | 12142 | Poni       | 0.58 | 0.70 | 0.79 | 65215  | 30255  | 2803   |
| BFA | Burkina Faso | 12143 | Sanguie    | 0.51 | 0.52 | 0.53 | 106218 | 101928 | 100248 |
| BFA | Burkina Faso | 12144 | Sanmatenga | 0.51 | 0.52 | 0.53 | 213550 | 204927 | 201548 |
| BFA | Burkina Faso | 12145 | Seno       | 0.51 | 0.52 | 0.53 | 96536  | 92638  | 91111  |
| BFA | Burkina Faso | 12146 | Sissili    | 0.51 | 0.52 | 0.53 | 74335  | 71333  | 70157  |
| BFA | Burkina Faso | 12147 | Soum       | 0.51 | 0.52 | 0.53 | 122018 | 117091 | 115161 |
| BFA | Burkina Faso | 12148 | Sourou     | 0.51 | 0.52 | 0.53 | 77965  | 74817  | 73583  |
| BFA | Burkina Faso | 12149 | Tapoa      | 0.51 | 0.52 | 0.53 | 118050 | 113283 | 111415 |
| BFA | Burkina Faso | 12150 | Tuy        | 0.51 | 0.52 | 0.53 | 84322  | 80917  | 79583  |



|     |              |       |                          |      |      |      |        |        |       |
|-----|--------------|-------|--------------------------|------|------|------|--------|--------|-------|
| BFA | Burkina Faso | 12151 | Yagha                    | 0.51 | 0.52 | 0.53 | 54185  | 51997  | 51139 |
| BFA | Burkina Faso | 12152 | Yatenga                  | 0.58 | 0.63 | 0.69 | 152466 | 116757 | 74433 |
| BFA | Burkina Faso | 12153 | Ziro                     | 0.51 | 0.52 | 0.53 | 59981  | 57559  | 56610 |
| BFA | Burkina Faso | 12154 | Zonдома                  | 0.51 | 0.52 | 0.53 | 59910  | 57491  | 56543 |
| BFA | Burkina Faso | 12155 | Zoundweogo               | 0.51 | 0.52 | 0.53 | 86454  | 82963  | 81595 |
| BOL | Bolivia      | 6141  | Cercado                  | 0.78 | 0.82 | 0.85 | 2718   | 0      | 0     |
| BOL | Bolivia      | 6142  | General Jose Ballivian   | 0.78 | 0.82 | 0.85 | 1802   | 0      | 0     |
| BOL | Bolivia      | 6143  | Itenez                   | 0.78 | 0.82 | 0.85 | 538    | 0      | 0     |
| BOL | Bolivia      | 6144  | Mamore                   | 0.78 | 0.82 | 0.85 | 287    | 0      | 0     |
| BOL | Bolivia      | 6147  | Vaca Diez                | 0.78 | 0.82 | 0.85 | 2895   | 0      | 0     |
| BOL | Bolivia      | 6148  | Yacuma                   | 0.78 | 0.82 | 0.85 | 926    | 0      | 0     |
| BOL | Bolivia      | 6174  | Camacho                  | 0.78 | 0.82 | 0.86 | 1309   | 0      | 0     |
| BOL | Bolivia      | 6175  | Franz Tamayo             | 0.78 | 0.82 | 0.86 | 800    | 0      | 0     |
| BOL | Bolivia      | 6180  | Abel Iturralde           | 0.78 | 0.82 | 0.86 | 644    | 0      | 0     |
| BOL | Bolivia      | 6181  | Larecaja                 | 0.78 | 0.82 | 0.86 | 1853   | 0      | 0     |
| BOL | Bolivia      | 6183  | Manco Kapac              | 0.78 | 0.82 | 0.86 | 634    | 0      | 0     |
| BOL | Bolivia      | 6184  | Munecas                  | 0.78 | 0.82 | 0.86 | 769    | 0      | 0     |
| BOL | Bolivia      | 6185  | Murillo                  | 0.78 | 0.82 | 0.86 | 37001  | 0      | 0     |
| BOL | Bolivia      | 6187  | Omasuyos                 | 0.78 | 0.82 | 0.86 | 2214   | 0      | 0     |
| BOL | Bolivia      | 6189  | Bautista Saavedra        | 0.78 | 0.82 | 0.86 | 293    | 0      | 0     |
| BOL | Bolivia      | 6190  | Sud Yungas               | 0.78 | 0.82 | 0.86 | 2221   | 0      | 0     |
| BOL | Bolivia      | 6191  | Admin unit not available | 0.78 | 0.82 | 0.86 | 160    | 0      | 0     |
| BOL | Bolivia      | 6203  | General Federico Roman   | 0.78 | 0.82 | 0.84 | 252    | 0      | 0     |
| BOL | Bolivia      | 6204  | Madre De Dios            | 0.78 | 0.82 | 0.84 | 691    | 0      | 0     |
| BOL | Bolivia      | 6205  | Manuripi                 | 0.78 | 0.82 | 0.84 | 459    | 0      | 0     |
| BOL | Bolivia      | 6222  | Angel Sandoval           | 0.78 | 0.82 | 0.86 | 557    | 0      | 0     |
| BOL | Bolivia      | 6233  | Velasco                  | 0.78 | 0.82 | 0.86 | 1839   | 0      | 0     |
| BOL | Bolivia      | 40451 | Marban                   | 0.78 | 0.82 | 0.85 | 1020   | 0      | 0     |
| BOL | Bolivia      | 40452 | Moxos                    | 0.78 | 0.82 | 0.85 | 1011   | 0      | 0     |
| BOL | Bolivia      | 40453 | Azurduy                  | 0.78 | 0.82 | 0.85 | 641    | 0      | 0     |
| BOL | Bolivia      | 40454 | Belisario Boeto          | 0.78 | 0.82 | 0.85 | 235    | 0      | 0     |
| BOL | Bolivia      | 40455 | Hernando Siles           | 0.78 | 0.82 | 0.85 | 674    | 0      | 0     |
| BOL | Bolivia      | 40456 | Luis Calvo               | 0.78 | 0.82 | 0.85 | 515    | 0      | 0     |

|     |         |       |                      |      |      |      |       |   |   |
|-----|---------|-------|----------------------|------|------|------|-------|---|---|
| BOL | Bolivia | 40457 | Nor Cinti            | 0.78 | 0.82 | 0.85 | 1868  | 0 | 0 |
| BOL | Bolivia | 40458 | Oropeza              | 0.78 | 0.82 | 0.85 | 6079  | 0 | 0 |
| BOL | Bolivia | 40459 | Sud Cinti            | 0.78 | 0.82 | 0.85 | 625   | 0 | 0 |
| BOL | Bolivia | 40460 | Tomina               | 0.78 | 0.82 | 0.85 | 766   | 0 | 0 |
| BOL | Bolivia | 40461 | Yamparaez            | 0.78 | 0.82 | 0.85 | 837   | 0 | 0 |
| BOL | Bolivia | 40462 | Zudanez              | 0.78 | 0.82 | 0.85 | 1678  | 0 | 0 |
| BOL | Bolivia | 40463 | Arani                | 0.78 | 0.82 | 0.86 | 395   | 0 | 0 |
| BOL | Bolivia | 40464 | Arque                | 0.78 | 0.82 | 0.86 | 476   | 0 | 0 |
| BOL | Bolivia | 40465 | Ayopaya              | 0.78 | 0.82 | 0.86 | 1385  | 0 | 0 |
| BOL | Bolivia | 40466 | Bolivar              | 0.78 | 0.82 | 0.86 | 177   | 0 | 0 |
| BOL | Bolivia | 40467 | Campero              | 0.78 | 0.82 | 0.86 | 908   | 0 | 0 |
| BOL | Bolivia | 40468 | Capinota             | 0.78 | 0.82 | 0.86 | 2776  | 0 | 0 |
| BOL | Bolivia | 40469 | Carrasco             | 0.88 | 0.90 | 0.91 | 0     | 0 | 0 |
| BOL | Bolivia | 40470 | Cercado              | 0.78 | 0.82 | 0.86 | 14117 | 0 | 0 |
| BOL | Bolivia | 40471 | Chapare              | 0.78 | 0.82 | 0.86 | 5742  | 0 | 0 |
| BOL | Bolivia | 40472 | Esteban Arce         | 0.78 | 0.82 | 0.86 | 858   | 0 | 0 |
| BOL | Bolivia | 40473 | German Jordan        | 0.78 | 0.82 | 0.86 | 805   | 0 | 0 |
| BOL | Bolivia | 40474 | Mizque               | 0.78 | 0.82 | 0.86 | 800   | 0 | 0 |
| BOL | Bolivia | 40475 | Punata               | 0.78 | 0.82 | 0.86 | 1634  | 0 | 0 |
| BOL | Bolivia | 40476 | Quillacollo          | 0.78 | 0.82 | 0.86 | 8465  | 0 | 0 |
| BOL | Bolivia | 40477 | Tapacari             | 0.78 | 0.82 | 0.86 | 592   | 0 | 0 |
| BOL | Bolivia | 40478 | Tiraque              | 0.78 | 0.82 | 0.86 | 892   | 0 | 0 |
| BOL | Bolivia | 40479 | Aroma                | 0.78 | 0.82 | 0.86 | 2601  | 0 | 0 |
| BOL | Bolivia | 40480 | Caranavi             | 0.78 | 0.82 | 0.86 | 2515  | 0 | 0 |
| BOL | Bolivia | 40481 | General J.M. Pando   | 0.78 | 0.82 | 0.86 | 174   | 0 | 0 |
| BOL | Bolivia | 40482 | Gualberto Villarroel | 0.78 | 0.82 | 0.86 | 405   | 0 | 0 |
| BOL | Bolivia | 40483 | Ingavi               | 0.78 | 0.82 | 0.86 | 4267  | 0 | 0 |
| BOL | Bolivia | 40484 | Inquisivi            | 0.78 | 0.82 | 0.86 | 1685  | 0 | 0 |
| BOL | Bolivia | 40485 | Loayza               | 0.78 | 0.82 | 0.86 | 1439  | 0 | 0 |
| BOL | Bolivia | 40486 | Los Andes            | 0.78 | 0.82 | 0.86 | 1410  | 0 | 0 |
| BOL | Bolivia | 40487 | Nor Yungas           | 0.78 | 0.82 | 0.86 | 2844  | 0 | 0 |
| BOL | Bolivia | 40488 | Pacajes              | 0.78 | 0.82 | 0.86 | 1285  | 0 | 0 |
| BOL | Bolivia | 40489 | Atahualpa            | 0.78 | 0.82 | 0.84 | 352   | 0 | 0 |

|     |         |       |                     |      |      |      |      |   |   |
|-----|---------|-------|---------------------|------|------|------|------|---|---|
| BOL | Bolivia | 40490 | Avaroa              | 0.78 | 0.82 | 0.84 | 774  | 0 | 0 |
| BOL | Bolivia | 40491 | Carangas            | 0.78 | 0.82 | 0.84 | 279  | 0 | 0 |
| BOL | Bolivia | 40492 | Cercado             | 0.78 | 0.82 | 0.84 | 7779 | 0 | 0 |
| BOL | Bolivia | 40493 | Ladislao Cabrera    | 0.78 | 0.82 | 0.84 | 375  | 0 | 0 |
| BOL | Bolivia | 40494 | Litoral             | 0.78 | 0.82 | 0.84 | 262  | 0 | 0 |
| BOL | Bolivia | 40495 | Mejillones          | 0.78 | 0.82 | 0.84 | 59   | 0 | 0 |
| BOL | Bolivia | 40496 | Nor Carangas        | 0.78 | 0.82 | 0.84 | 129  | 0 | 0 |
| BOL | Bolivia | 40497 | Pantaleon Dalence   | 0.78 | 0.82 | 0.84 | 910  | 0 | 0 |
| BOL | Bolivia | 40498 | Poopo               | 0.78 | 0.82 | 0.84 | 440  | 0 | 0 |
| BOL | Bolivia | 40499 | Sajama              | 0.78 | 0.82 | 0.84 | 233  | 0 | 0 |
| BOL | Bolivia | 40500 | San Pedro de Totora | 0.78 | 0.82 | 0.84 | 146  | 0 | 0 |
| BOL | Bolivia | 40501 | Saucari             | 0.78 | 0.82 | 0.84 | 291  | 0 | 0 |
| BOL | Bolivia | 40502 | Sebastian Pagador   | 0.78 | 0.82 | 0.84 | 346  | 0 | 0 |
| BOL | Bolivia | 40503 | Sud Carangas        | 0.78 | 0.82 | 0.84 | 178  | 0 | 0 |
| BOL | Bolivia | 40504 | Tomas Barron        | 0.78 | 0.82 | 0.84 | 123  | 0 | 0 |
| BOL | Bolivia | 40505 | Abuna               | 0.78 | 0.82 | 0.84 | 174  | 0 | 0 |
| BOL | Bolivia | 40506 | Nicolas Suarez      | 0.78 | 0.82 | 0.84 | 1667 | 0 | 0 |
| BOL | Bolivia | 40507 | Alonso de Ibanez    | 0.78 | 0.82 | 0.84 | 646  | 0 | 0 |
| BOL | Bolivia | 40508 | Antonio Quijarro    | 0.78 | 0.82 | 0.84 | 1508 | 0 | 0 |
| BOL | Bolivia | 40509 | Charcas             | 0.78 | 0.82 | 0.84 | 1068 | 0 | 0 |
| BOL | Bolivia | 40510 | Chayanta            | 0.78 | 0.82 | 0.84 | 2479 | 0 | 0 |
| BOL | Bolivia | 40511 | Cornelio Saavedra   | 0.78 | 0.82 | 0.84 | 1602 | 0 | 0 |
| BOL | Bolivia | 40512 | Daniel Campos       | 0.78 | 0.82 | 0.84 | 132  | 0 | 0 |
| BOL | Bolivia | 40513 | Enrique Valdivieso  | 0.78 | 0.82 | 0.84 | 43   | 0 | 0 |
| BOL | Bolivia | 40514 | General Bilbao      | 0.78 | 0.82 | 0.84 | 321  | 0 | 0 |
| BOL | Bolivia | 40515 | Jose Maria Linares  | 0.78 | 0.82 | 0.84 | 1582 | 0 | 0 |
| BOL | Bolivia | 40516 | Modesto Omiste      | 0.78 | 0.82 | 0.84 | 988  | 0 | 0 |
| BOL | Bolivia | 40517 | Nor Chichas         | 0.78 | 0.82 | 0.84 | 1057 | 0 | 0 |
| BOL | Bolivia | 40518 | Nor Lipez           | 0.78 | 0.82 | 0.84 | 373  | 0 | 0 |
| BOL | Bolivia | 40519 | Rafael Bustillo     | 0.78 | 0.82 | 0.84 | 1898 | 0 | 0 |
| BOL | Bolivia | 40520 | Sud Chichas         | 0.78 | 0.82 | 0.84 | 1444 | 0 | 0 |
| BOL | Bolivia | 40521 | Sud Lipez           | 0.78 | 0.82 | 0.84 | 186  | 0 | 0 |
| BOL | Bolivia | 40522 | Tomas Frias         | 0.78 | 0.82 | 0.84 | 4921 | 0 | 0 |

|     |         |       |                        |      |      |      |       |      |   |
|-----|---------|-------|------------------------|------|------|------|-------|------|---|
| BOL | Bolivia | 40523 | Andres Ibanez          | 0.79 | 0.88 | 0.91 | 20324 | 0    | 0 |
| BOL | Bolivia | 40524 | Chiquitos              | 0.78 | 0.82 | 0.86 | 1899  | 0    | 0 |
| BOL | Bolivia | 40525 | Cordillera             | 0.78 | 0.91 | 0.95 | 2826  | 0    | 0 |
| BOL | Bolivia | 40526 | Florida                | 0.78 | 0.82 | 0.86 | 671   | 0    | 0 |
| BOL | Bolivia | 40527 | German Busch           | 0.78 | 0.82 | 0.86 | 863   | 0    | 0 |
| BOL | Bolivia | 40528 | Guarayos               | 0.78 | 0.82 | 0.86 | 1392  | 0    | 0 |
| BOL | Bolivia | 40529 | Ichilo                 | 0.88 | 0.90 | 0.91 | 0     | 0    | 0 |
| BOL | Bolivia | 40530 | Manuel Maria Caballero | 0.78 | 0.82 | 0.86 | 642   | 0    | 0 |
| BOL | Bolivia | 40531 | Nuflor De Chavez       | 0.78 | 0.82 | 0.86 | 2777  | 0    | 0 |
| BOL | Bolivia | 40532 | Obispo Santiesteban    | 0.78 | 0.85 | 0.91 | 4583  | 0    | 0 |
| BOL | Bolivia | 40533 | Sara (Gutierrez)       | 0.78 | 0.82 | 0.86 | 1330  | 0    | 0 |
| BOL | Bolivia | 40534 | Vallegrande            | 0.78 | 0.82 | 0.86 | 618   | 0    | 0 |
| BOL | Bolivia | 40535 | Warnes                 | 0.78 | 0.82 | 0.86 | 2664  | 0    | 0 |
| BOL | Bolivia | 40536 | Aniceto Arce           | 0.78 | 0.82 | 0.85 | 1212  | 0    | 0 |
| BOL | Bolivia | 40537 | Avilez                 | 0.78 | 0.82 | 0.85 | 534   | 0    | 0 |
| BOL | Bolivia | 40538 | Cercado                | 0.78 | 0.82 | 0.85 | 4640  | 0    | 0 |
| BOL | Bolivia | 40539 | Gran Chaco             | 0.78 | 0.82 | 0.85 | 3639  | 0    | 0 |
| BOL | Bolivia | 40540 | Mendez                 | 0.78 | 0.82 | 0.85 | 1034  | 0    | 0 |
| BOL | Bolivia | 40541 | O'Connor               | 0.78 | 0.82 | 0.85 | 954   | 0    | 0 |
| BRA | Brazil  | 6333  | Acrelandia             | 0.35 | 0.80 | 1.00 | 6522  | 15   | 0 |
| BRA | Brazil  | 6334  | Assis Brasil           | 0.50 | 0.87 | 1.00 | 2040  | 0    | 0 |
| BRA | Brazil  | 6335  | Brasileia              | 0.39 | 0.82 | 1.00 | 9686  | 0    | 0 |
| BRA | Brazil  | 6336  | Bujari                 | 0.32 | 0.78 | 1.00 | 5202  | 247  | 0 |
| BRA | Brazil  | 6337  | Capixaba               | 0.36 | 0.80 | 1.00 | 5225  | 0    | 0 |
| BRA | Brazil  | 6338  | Cruzeiro Do Sul        | 0.43 | 0.85 | 1.00 | 23478 | 0    | 0 |
| BRA | Brazil  | 6339  | Epitaciolandia         | 0.32 | 0.79 | 0.99 | 10647 | 199  | 0 |
| BRA | Brazil  | 6340  | Feijo                  | 0.36 | 0.81 | 1.00 | 14268 | 0    | 0 |
| BRA | Brazil  | 6341  | Jordao                 | 0.33 | 0.78 | 1.00 | 3964  | 130  | 0 |
| BRA | Brazil  | 6342  | Mancio Lima            | 0.36 | 0.76 | 1.00 | 7672  | 615  | 0 |
| BRA | Brazil  | 6343  | Manoel Urbano          | 0.32 | 0.76 | 1.00 | 4301  | 351  | 0 |
| BRA | Brazil  | 6344  | Marechal Thaumaturgo   | 0.32 | 0.75 | 1.00 | 8844  | 891  | 0 |
| BRA | Brazil  | 6345  | Placido De Castro      | 0.41 | 0.83 | 1.00 | 6627  | 0    | 0 |
| BRA | Brazil  | 6346  | Porto Acre             | 0.35 | 0.74 | 1.00 | 7946  | 1027 | 0 |

|     |        |      |                        |      |      |      |        |       |       |
|-----|--------|------|------------------------|------|------|------|--------|-------|-------|
| BRA | Brazil | 6347 | Porto Walter           | 0.34 | 0.78 | 1.00 | 5576   | 261   | 0     |
| BRA | Brazil | 6348 | Rio Branco             | 0.33 | 0.80 | 1.00 | 184707 | 0     | 0     |
| BRA | Brazil | 6349 | Rodrigues Alves        | 0.31 | 0.73 | 0.99 | 9643   | 1287  | 0     |
| BRA | Brazil | 6350 | Santa Rosa Do Purus    | 0.33 | 0.79 | 1.00 | 3150   | 101   | 0     |
| BRA | Brazil | 6351 | Sena Madureira         | 0.35 | 0.79 | 1.00 | 20211  | 430   | 0     |
| BRA | Brazil | 6352 | Senador Guiomard       | 0.38 | 0.76 | 0.99 | 11036  | 987   | 0     |
| BRA | Brazil | 6353 | Tarauaca               | 0.32 | 0.79 | 1.00 | 18660  | 412   | 0     |
| BRA | Brazil | 6354 | Xapuri                 | 0.37 | 0.82 | 1.00 | 8103   | 0     | 0     |
| BRA | Brazil | 6355 | Agua Branca            | 0.08 | 0.40 | 0.55 | 14551  | 8028  | 4989  |
| BRA | Brazil | 6356 | Anadia                 | 0.08 | 0.40 | 0.55 | 12710  | 7013  | 4358  |
| BRA | Brazil | 6357 | Arapiraca              | 0.08 | 0.40 | 0.55 | 171883 | 94832 | 58933 |
| BRA | Brazil | 6358 | Atalaia                | 0.08 | 0.40 | 0.55 | 34513  | 19042 | 11834 |
| BRA | Brazil | 6359 | Barra De Santo Antonio | 0.08 | 0.40 | 0.55 | 11710  | 6461  | 4015  |
| BRA | Brazil | 6360 | Barra De Sao Miguel    | 0.08 | 0.40 | 0.55 | 6296   | 3473  | 2159  |
| BRA | Brazil | 6361 | Batalha                | 0.08 | 0.40 | 0.55 | 14100  | 7779  | 4834  |
| BRA | Brazil | 6362 | Belem                  | 1.00 | 1.00 | 1.00 | 0      | 0     | 0     |
| BRA | Brazil | 6363 | Belo Monte             | 0.08 | 0.40 | 0.55 | 5067   | 2795  | 1737  |
| BRA | Brazil | 6364 | Boca Da Mata           | 0.08 | 0.40 | 0.55 | 19771  | 10908 | 6779  |
| BRA | Brazil | 6365 | Branquinha             | 0.08 | 0.40 | 0.55 | 7765   | 4284  | 2662  |
| BRA | Brazil | 6366 | Cacimbinhas            | 0.08 | 0.40 | 0.55 | 7879   | 4347  | 2701  |
| BRA | Brazil | 6367 | Cajueiro               | 0.08 | 0.40 | 0.55 | 15712  | 8668  | 5387  |
| BRA | Brazil | 6368 | Campestre              | 0.41 | 0.81 | 0.95 | 2872   | 0     | 0     |
| BRA | Brazil | 6369 | Campo Alegre           | 0.10 | 0.45 | 0.62 | 36973  | 18492 | 9573  |
| BRA | Brazil | 6370 | Campo Grande           | 1.00 | 1.00 | 1.00 | 0      | 0     | 0     |
| BRA | Brazil | 6371 | Canapi                 | 0.08 | 0.40 | 0.55 | 13276  | 7325  | 4552  |
| BRA | Brazil | 6372 | Capela                 | 0.08 | 0.40 | 0.55 | 11776  | 6497  | 4038  |
| BRA | Brazil | 6373 | Carneiros              | 0.08 | 0.40 | 0.55 | 6926   | 3821  | 2375  |
| BRA | Brazil | 6374 | Cha Preta              | 0.08 | 0.40 | 0.55 | 5550   | 3062  | 1903  |
| BRA | Brazil | 6375 | Coite Do Noia          | 0.08 | 0.40 | 0.55 | 7705   | 4251  | 2642  |
| BRA | Brazil | 6376 | Colonia Leopoldina     | 0.08 | 0.40 | 0.55 | 16947  | 9350  | 5811  |
| BRA | Brazil | 6377 | Coqueiro Seco          | 0.08 | 0.40 | 0.55 | 4217   | 2327  | 1446  |
| BRA | Brazil | 6378 | Coruripe               | 0.08 | 0.40 | 0.55 | 45513  | 25111 | 15605 |
| BRA | Brazil | 6379 | Craibas                | 0.08 | 0.40 | 0.55 | 17622  | 9722  | 6042  |

|     |        |      |                      |      |      |      |        |        |        |
|-----|--------|------|----------------------|------|------|------|--------|--------|--------|
| BRA | Brazil | 6380 | Delmiro Gouveia      | 0.08 | 0.40 | 0.55 | 38283  | 21122  | 13126  |
| BRA | Brazil | 6381 | Dois Riachos         | 0.08 | 0.40 | 0.55 | 7934   | 4377   | 2720   |
| BRA | Brazil | 6382 | Estrela De Alagoas   | 0.08 | 0.40 | 0.55 | 13347  | 7364   | 4576   |
| BRA | Brazil | 6383 | Feira Grande         | 0.08 | 0.40 | 0.55 | 14566  | 8036   | 4994   |
| BRA | Brazil | 6384 | Feliz Deserto        | 0.08 | 0.40 | 0.55 | 3482   | 1921   | 1194   |
| BRA | Brazil | 6385 | Flexeiras            | 0.08 | 0.40 | 0.55 | 10895  | 6011   | 3736   |
| BRA | Brazil | 6386 | Girau Do Ponciano    | 0.08 | 0.40 | 0.55 | 31608  | 17439  | 10837  |
| BRA | Brazil | 6387 | Ibateguara           | 0.08 | 0.40 | 0.55 | 10901  | 6014   | 3738   |
| BRA | Brazil | 6388 | Igaci                | 0.08 | 0.40 | 0.55 | 18781  | 10362  | 6440   |
| BRA | Brazil | 6389 | Igreja Nova          | 0.08 | 0.40 | 0.55 | 18290  | 10091  | 6271   |
| BRA | Brazil | 6390 | Inhapi               | 0.08 | 0.40 | 0.55 | 13202  | 7284   | 4527   |
| BRA | Brazil | 6391 | Jacare Dos Homens    | 0.08 | 0.40 | 0.55 | 4028   | 2222   | 1381   |
| BRA | Brazil | 6392 | Jacuipe              | 0.08 | 0.40 | 0.55 | 5027   | 2774   | 1724   |
| BRA | Brazil | 6393 | Japaratinga          | 0.08 | 0.40 | 0.55 | 6297   | 3474   | 2159   |
| BRA | Brazil | 6394 | Jaramataia           | 0.08 | 0.40 | 0.55 | 4065   | 2243   | 1394   |
| BRA | Brazil | 6395 | Joaquim Gomes        | 0.08 | 0.40 | 0.55 | 14734  | 8129   | 5052   |
| BRA | Brazil | 6396 | Jundia               | 0.08 | 0.40 | 0.55 | 3402   | 1877   | 1167   |
| BRA | Brazil | 6397 | Junqueiro            | 0.08 | 0.40 | 0.55 | 16603  | 9161   | 5693   |
| BRA | Brazil | 6398 | Lagoa Da Canoa       | 0.08 | 0.40 | 0.55 | 14012  | 7731   | 4804   |
| BRA | Brazil | 6399 | Limoeiro De Anadia   | 0.08 | 0.40 | 0.55 | 21963  | 12117  | 7530   |
| BRA | Brazil | 6400 | Maceio               | 0.08 | 0.40 | 0.55 | 749365 | 413443 | 256932 |
| BRA | Brazil | 6401 | Major Isidoro        | 0.08 | 0.40 | 0.55 | 14535  | 8019   | 4984   |
| BRA | Brazil | 6402 | Mar Vermelho         | 0.08 | 0.40 | 0.55 | 2298   | 1268   | 788    |
| BRA | Brazil | 6403 | Maragogi             | 0.08 | 0.40 | 0.55 | 24418  | 13472  | 8372   |
| BRA | Brazil | 6404 | Maravilha            | 0.71 | 0.95 | 0.99 | 789    | 0      | 0      |
| BRA | Brazil | 6405 | Marechal Deodoro     | 0.08 | 0.40 | 0.55 | 39024  | 21531  | 13380  |
| BRA | Brazil | 6406 | Maribondo            | 0.08 | 0.40 | 0.55 | 9437   | 5207   | 3236   |
| BRA | Brazil | 6407 | Mata Grande          | 0.08 | 0.40 | 0.55 | 19765  | 10905  | 6777   |
| BRA | Brazil | 6408 | Matriz De Camaragibe | 0.08 | 0.40 | 0.55 | 19345  | 10673  | 6633   |
| BRA | Brazil | 6409 | Messias              | 0.08 | 0.40 | 0.55 | 13374  | 7379   | 4585   |
| BRA | Brazil | 6410 | Minador Do Negrão    | 0.08 | 0.40 | 0.55 | 3887   | 2145   | 1333   |
| BRA | Brazil | 6411 | Monteopolis          | 0.08 | 0.40 | 0.55 | 5346   | 2949   | 1833   |
| BRA | Brazil | 6412 | Murici               | 0.08 | 0.40 | 0.55 | 20923  | 11544  | 7174   |

|     |        |      |                        |      |      |      |       |       |       |
|-----|--------|------|------------------------|------|------|------|-------|-------|-------|
| BRA | Brazil | 6413 | Novo Lino              | 0.08 | 0.40 | 0.55 | 10393 | 5734  | 3564  |
| BRA | Brazil | 6414 | Olho D'agua Das Flores | 0.08 | 0.40 | 0.55 | 15228 | 8402  | 5221  |
| BRA | Brazil | 6415 | Olho D'agua Do Casado  | 0.08 | 0.40 | 0.55 | 6953  | 3836  | 2384  |
| BRA | Brazil | 6416 | Olho D'agua Grande     | 0.08 | 0.40 | 0.55 | 3886  | 2144  | 1332  |
| BRA | Brazil | 6417 | Olivenca               | 0.08 | 0.40 | 0.55 | 8409  | 4640  | 2883  |
| BRA | Brazil | 6418 | Ouro Branco            | 0.73 | 0.91 | 0.95 | 789   | 0     | 0     |
| BRA | Brazil | 6419 | Palestina              | 0.65 | 0.93 | 1.00 | 784   | 0     | 0     |
| BRA | Brazil | 6420 | Palmeira Dos Indios    | 0.08 | 0.40 | 0.55 | 53310 | 29413 | 18278 |
| BRA | Brazil | 6421 | Pao De Acucar          | 0.08 | 0.40 | 0.55 | 17423 | 9613  | 5974  |
| BRA | Brazil | 6422 | Pariconha              | 0.08 | 0.40 | 0.55 | 7938  | 4379  | 2722  |
| BRA | Brazil | 6423 | Paripueira             | 0.08 | 0.40 | 0.55 | 9840  | 5429  | 3374  |
| BRA | Brazil | 6424 | Passo De Camaragibe    | 0.08 | 0.40 | 0.55 | 10363 | 5718  | 3553  |
| BRA | Brazil | 6425 | Paulo Jacinto          | 0.08 | 0.40 | 0.55 | 5216  | 2878  | 1789  |
| BRA | Brazil | 6426 | Penedo                 | 0.08 | 0.40 | 0.55 | 47555 | 26238 | 16305 |
| BRA | Brazil | 6427 | Piacabucu              | 0.08 | 0.40 | 0.55 | 12647 | 6978  | 4336  |
| BRA | Brazil | 6428 | Pilar                  | 0.08 | 0.40 | 0.55 | 25633 | 14143 | 8789  |
| BRA | Brazil | 6429 | Pindoba                | 0.08 | 0.40 | 0.55 | 1893  | 1045  | 649   |
| BRA | Brazil | 6430 | Piranhas               | 0.25 | 0.61 | 0.82 | 13004 | 4348  | 0     |
| BRA | Brazil | 6431 | Poco Das Trincheiras   | 0.08 | 0.40 | 0.55 | 10440 | 5760  | 3580  |
| BRA | Brazil | 6432 | Porto Calvo            | 0.08 | 0.40 | 0.55 | 18336 | 10116 | 6287  |
| BRA | Brazil | 6433 | Porto De Pedras        | 0.08 | 0.40 | 0.55 | 6960  | 3840  | 2386  |
| BRA | Brazil | 6434 | Porto Real Do Colegio  | 0.08 | 0.40 | 0.55 | 15239 | 8408  | 5225  |
| BRA | Brazil | 6435 | Quebrangulo            | 0.08 | 0.40 | 0.55 | 8074  | 4454  | 2768  |
| BRA | Brazil | 6436 | Rio Largo              | 0.08 | 0.40 | 0.55 | 51106 | 28196 | 17523 |
| BRA | Brazil | 6437 | Roteiro                | 0.08 | 0.40 | 0.55 | 4725  | 2607  | 1620  |
| BRA | Brazil | 6438 | Santa Luzia Do Norte   | 0.08 | 0.40 | 0.55 | 6666  | 3678  | 2286  |
| BRA | Brazil | 6439 | Santana Do Ipanema     | 0.08 | 0.40 | 0.55 | 35005 | 19313 | 12002 |
| BRA | Brazil | 6440 | Santana Do Mundau      | 0.08 | 0.40 | 0.55 | 7385  | 4075  | 2532  |
| BRA | Brazil | 6441 | Sao Bras               | 0.08 | 0.40 | 0.55 | 5168  | 2851  | 1772  |
| BRA | Brazil | 6442 | Sao Jose Da Laje       | 0.08 | 0.40 | 0.55 | 17985 | 9923  | 6166  |
| BRA | Brazil | 6443 | Sao Jose Da Tapera     | 0.08 | 0.40 | 0.55 | 25499 | 14068 | 8743  |
| BRA | Brazil | 6444 | Sao Luis Do Quitunde   | 0.08 | 0.40 | 0.55 | 25055 | 13824 | 8591  |
| BRA | Brazil | 6445 | Sao Miguel Dos Campos  | 0.08 | 0.40 | 0.55 | 54082 | 29838 | 18543 |

|     |        |      |                         |      |      |      |        |       |       |
|-----|--------|------|-------------------------|------|------|------|--------|-------|-------|
| BRA | Brazil | 6446 | Sao Miguel Dos Milagres | 0.08 | 0.40 | 0.55 | 5353   | 2954  | 1835  |
| BRA | Brazil | 6447 | Sao Sebastiao           | 0.09 | 0.56 | 0.76 | 24011  | 8181  | 1436  |
| BRA | Brazil | 6448 | Satuba                  | 0.08 | 0.40 | 0.55 | 14439  | 7967  | 4951  |
| BRA | Brazil | 6449 | Senador Rui Palmeira    | 0.08 | 0.40 | 0.55 | 9833   | 5425  | 3372  |
| BRA | Brazil | 6450 | Tanque D'arca           | 0.08 | 0.40 | 0.55 | 5201   | 2870  | 1783  |
| BRA | Brazil | 6451 | Taquarana               | 0.08 | 0.40 | 0.55 | 15142  | 8354  | 5192  |
| BRA | Brazil | 6452 | Teotonio Vilela         | 0.08 | 0.40 | 0.55 | 32160  | 17744 | 11027 |
| BRA | Brazil | 6453 | Traipu                  | 0.08 | 0.40 | 0.55 | 19885  | 10971 | 6818  |
| BRA | Brazil | 6454 | Uniao Dos Palmares      | 0.08 | 0.40 | 0.55 | 47759  | 26350 | 16375 |
| BRA | Brazil | 6455 | Vicosa                  | 0.40 | 0.85 | 0.96 | 10412  | 0     | 0     |
| BRA | Brazil | 6456 | Amapa                   | 0.37 | 0.88 | 1.00 | 3794   | 0     | 0     |
| BRA | Brazil | 6457 | Calcoene                | 0.37 | 0.86 | 1.00 | 4656   | 0     | 0     |
| BRA | Brazil | 6458 | Cutias                  | 0.41 | 0.86 | 0.98 | 2153   | 0     | 0     |
| BRA | Brazil | 6459 | Ferreira Gomes          | 0.37 | 0.86 | 0.98 | 3293   | 0     | 0     |
| BRA | Brazil | 6460 | Itaubal                 | 0.45 | 0.89 | 0.99 | 1603   | 0     | 0     |
| BRA | Brazil | 6461 | Laranjal Do Jari        | 0.45 | 0.94 | 1.00 | 4672   | 0     | 0     |
| BRA | Brazil | 6462 | Macapa                  | 0.37 | 0.88 | 0.99 | 207498 | 0     | 0     |
| BRA | Brazil | 6463 | Mazagao                 | 0.33 | 0.80 | 0.93 | 9904   | 0     | 0     |
| BRA | Brazil | 6464 | Oiapoque                | 0.33 | 0.84 | 0.97 | 11619  | 0     | 0     |
| BRA | Brazil | 6465 | Pedra Branca Do Amapari | 0.31 | 0.83 | 0.96 | 8948   | 0     | 0     |
| BRA | Brazil | 6466 | Porto Grande            | 0.34 | 0.84 | 0.97 | 9733   | 0     | 0     |
| BRA | Brazil | 6467 | Pracuuba                | 0.31 | 0.80 | 0.94 | 2526   | 10    | 0     |
| BRA | Brazil | 6468 | Santana                 | 0.40 | 0.88 | 1.00 | 44942  | 0     | 0     |
| BRA | Brazil | 6469 | Serra Do Navio          | 0.52 | 0.93 | 0.98 | 1469   | 0     | 0     |
| BRA | Brazil | 6470 | Tartarugalzinho         | 0.34 | 0.83 | 0.97 | 8116   | 0     | 0     |
| BRA | Brazil | 6471 | Vitoria Do Jari         | 0.26 | 0.73 | 0.84 | 21307  | 2854  | 0     |
| BRA | Brazil | 6472 | Alvaraes                | 0.37 | 0.90 | 1.00 | 6676   | 0     | 0     |
| BRA | Brazil | 6473 | Amatura                 | 0.39 | 0.92 | 1.00 | 4552   | 0     | 0     |
| BRA | Brazil | 6474 | Anama                   | 0.35 | 0.86 | 1.00 | 5930   | 0     | 0     |
| BRA | Brazil | 6475 | Anori                   | 0.34 | 0.85 | 0.99 | 9317   | 0     | 0     |
| BRA | Brazil | 6476 | Apui                    | 0.35 | 0.87 | 0.98 | 9597   | 0     | 0     |
| BRA | Brazil | 6477 | Atalaia Do Norte        | 0.34 | 0.86 | 1.00 | 8724   | 0     | 0     |
| BRA | Brazil | 6478 | Autazes                 | 0.36 | 0.89 | 1.00 | 16508  | 0     | 0     |



|     |        |      |                    |      |      |      |        |     |   |
|-----|--------|------|--------------------|------|------|------|--------|-----|---|
| BRA | Brazil | 6479 | Barcelos           | 0.29 | 0.80 | 0.96 | 13947  | 0   | 0 |
| BRA | Brazil | 6480 | Barreirinha        | 0.38 | 0.90 | 1.00 | 13019  | 0   | 0 |
| BRA | Brazil | 6481 | Benjamin Constant  | 0.38 | 0.92 | 1.00 | 15891  | 0   | 0 |
| BRA | Brazil | 6482 | Beruri             | 0.36 | 0.87 | 1.00 | 8414   | 0   | 0 |
| BRA | Brazil | 6483 | Boa Vista Do Ramos | 0.38 | 0.89 | 1.00 | 7772   | 0   | 0 |
| BRA | Brazil | 6484 | Boca Do Acre       | 0.36 | 0.89 | 1.00 | 14707  | 0   | 0 |
| BRA | Brazil | 6485 | Borba              | 0.37 | 0.91 | 1.00 | 17032  | 0   | 0 |
| BRA | Brazil | 6486 | Caapiranga         | 0.33 | 0.84 | 0.99 | 5820   | 0   | 0 |
| BRA | Brazil | 6487 | Canutama           | 0.32 | 0.83 | 0.99 | 7148   | 0   | 0 |
| BRA | Brazil | 6488 | Carauari           | 0.36 | 0.90 | 1.00 | 12322  | 0   | 0 |
| BRA | Brazil | 6489 | Careiro            | 0.32 | 0.87 | 1.00 | 17779  | 0   | 0 |
| BRA | Brazil | 6490 | Careiro Da Varzea  | 0.36 | 0.89 | 1.00 | 12819  | 0   | 0 |
| BRA | Brazil | 6491 | Coari              | 0.37 | 0.91 | 1.00 | 35196  | 0   | 0 |
| BRA | Brazil | 6492 | Codajas            | 0.33 | 0.86 | 1.00 | 13476  | 0   | 0 |
| BRA | Brazil | 6493 | Eirunepe           | 0.37 | 0.88 | 1.00 | 14988  | 0   | 0 |
| BRA | Brazil | 6494 | Envira             | 0.34 | 0.84 | 0.98 | 10597  | 0   | 0 |
| BRA | Brazil | 6495 | Fonte Boa          | 0.38 | 0.90 | 1.00 | 8337   | 0   | 0 |
| BRA | Brazil | 6496 | Guajara            | 0.26 | 0.79 | 0.95 | 21855  | 329 | 0 |
| BRA | Brazil | 6497 | Humaita            | 0.36 | 0.89 | 1.00 | 23102  | 0   | 0 |
| BRA | Brazil | 6498 | Ipixuna            | 0.30 | 0.80 | 0.95 | 14804  | 0   | 0 |
| BRA | Brazil | 6499 | Irاندوبا           | 0.38 | 0.90 | 1.00 | 19611  | 0   | 0 |
| BRA | Brazil | 6500 | Itacoatiara        | 0.38 | 0.91 | 1.00 | 41645  | 0   | 0 |
| BRA | Brazil | 6501 | Itamarati          | 0.36 | 0.89 | 1.00 | 3571   | 0   | 0 |
| BRA | Brazil | 6502 | Itapiranga         | 0.38 | 0.92 | 1.00 | 3768   | 0   | 0 |
| BRA | Brazil | 6503 | Japura             | 0.43 | 0.95 | 1.00 | 2412   | 0   | 0 |
| BRA | Brazil | 6504 | Jurua              | 0.34 | 0.86 | 1.00 | 6596   | 0   | 0 |
| BRA | Brazil | 6505 | Jutai              | 0.37 | 0.89 | 1.00 | 7180   | 0   | 0 |
| BRA | Brazil | 6506 | Labrea             | 0.37 | 0.91 | 1.00 | 18961  | 0   | 0 |
| BRA | Brazil | 6507 | Manacapuru         | 0.47 | 0.94 | 1.00 | 31431  | 0   | 0 |
| BRA | Brazil | 6508 | Manaquiri          | 0.31 | 0.83 | 0.96 | 15189  | 0   | 0 |
| BRA | Brazil | 6509 | Manaus             | 0.37 | 0.90 | 1.00 | 902850 | 0   | 0 |
| BRA | Brazil | 6510 | Manicore           | 0.35 | 0.88 | 1.00 | 24321  | 0   | 0 |
| BRA | Brazil | 6511 | Maraa              | 0.36 | 0.90 | 1.00 | 7975   | 0   | 0 |

|     |        |      |                           |      |      |      |        |       |       |
|-----|--------|------|---------------------------|------|------|------|--------|-------|-------|
| BRA | Brazil | 6512 | Maues                     | 0.37 | 0.90 | 1.00 | 26599  | 0     | 0     |
| BRA | Brazil | 6513 | Nhamunda                  | 0.36 | 0.87 | 1.00 | 9196   | 0     | 0     |
| BRA | Brazil | 6514 | Nova Olinda Do Norte      | 0.35 | 0.85 | 1.00 | 16436  | 0     | 0     |
| BRA | Brazil | 6515 | Novo Airao                | 0.34 | 0.85 | 0.99 | 8684   | 0     | 0     |
| BRA | Brazil | 6516 | Novo Aripuana             | 0.37 | 0.88 | 1.00 | 10634  | 0     | 0     |
| BRA | Brazil | 6517 | Parintins                 | 0.36 | 0.88 | 1.00 | 48983  | 0     | 0     |
| BRA | Brazil | 6518 | Pauini                    | 0.36 | 0.87 | 1.00 | 8634   | 0     | 0     |
| BRA | Brazil | 6519 | Presidente Figueiredo     | 0.37 | 0.92 | 1.00 | 14931  | 0     | 0     |
| BRA | Brazil | 6520 | Rio Preto Da Eva          | 0.35 | 0.89 | 1.00 | 14390  | 0     | 0     |
| BRA | Brazil | 6521 | Santa Isabel Do Rio Negro | 0.32 | 0.85 | 1.00 | 11655  | 0     | 0     |
| BRA | Brazil | 6522 | Santo Antonio Do Ica      | 0.38 | 0.91 | 1.00 | 10368  | 0     | 0     |
| BRA | Brazil | 6523 | Sao Gabriel Da Cachoeira  | 0.40 | 0.92 | 1.00 | 17405  | 0     | 0     |
| BRA | Brazil | 6524 | Sao Paulo De Olivenca     | 0.35 | 0.89 | 1.00 | 19099  | 0     | 0     |
| BRA | Brazil | 6525 | Sao Sebastiao Do Uatuma   | 0.35 | 0.85 | 0.98 | 6069   | 0     | 0     |
| BRA | Brazil | 6526 | Silves                    | 0.38 | 0.91 | 1.00 | 3823   | 0     | 0     |
| BRA | Brazil | 6527 | Tabatinga                 | 0.37 | 0.93 | 1.00 | 25138  | 0     | 0     |
| BRA | Brazil | 6528 | Tapaua                    | 0.38 | 0.92 | 1.00 | 7746   | 0     | 0     |
| BRA | Brazil | 6529 | Tefe                      | 0.38 | 0.93 | 1.00 | 25967  | 0     | 0     |
| BRA | Brazil | 6530 | Tonantins                 | 0.37 | 0.90 | 1.00 | 7834   | 0     | 0     |
| BRA | Brazil | 6531 | Uarini                    | 0.37 | 0.91 | 1.00 | 5701   | 0     | 0     |
| BRA | Brazil | 6532 | Urucara                   | 0.39 | 0.91 | 1.00 | 7020   | 0     | 0     |
| BRA | Brazil | 6533 | Urucurituba               | 0.36 | 0.87 | 1.00 | 9643   | 0     | 0     |
| BRA | Brazil | 6534 | Abaira                    | 0.08 | 0.40 | 0.55 | 6423   | 3544  | 2202  |
| BRA | Brazil | 6535 | Abare                     | 0.08 | 0.40 | 0.55 | 14399  | 7944  | 4937  |
| BRA | Brazil | 6536 | Acajutiba                 | 0.08 | 0.40 | 0.55 | 11925  | 6579  | 4089  |
| BRA | Brazil | 6537 | Adustina                  | 0.08 | 0.40 | 0.55 | 11986  | 6613  | 4109  |
| BRA | Brazil | 6538 | Agua Fria                 | 0.08 | 0.40 | 0.55 | 12419  | 6852  | 4258  |
| BRA | Brazil | 6539 | Aiquara                   | 0.08 | 0.40 | 0.55 | 3895   | 2149  | 1335  |
| BRA | Brazil | 6540 | Alagoinhas                | 0.08 | 0.40 | 0.55 | 109421 | 60371 | 37517 |
| BRA | Brazil | 6541 | Alcobaca                  | 0.08 | 0.40 | 0.55 | 16025  | 8841  | 5494  |
| BRA | Brazil | 6542 | Almadina                  | 0.08 | 0.40 | 0.55 | 4389   | 2422  | 1505  |
| BRA | Brazil | 6543 | Amargosa                  | 0.08 | 0.40 | 0.55 | 26671  | 14715 | 9145  |
| BRA | Brazil | 6544 | Amelia Rodrigues          | 0.08 | 0.40 | 0.55 | 26729  | 14747 | 9164  |

|     |        |      |                   |      |      |      |        |       |       |
|-----|--------|------|-------------------|------|------|------|--------|-------|-------|
| BRA | Brazil | 6545 | America Dourada   | 0.08 | 0.40 | 0.55 | 10947  | 6040  | 3753  |
| BRA | Brazil | 6546 | Anage             | 0.08 | 0.40 | 0.55 | 16662  | 9193  | 5713  |
| BRA | Brazil | 6547 | Andarai           | 0.08 | 0.40 | 0.55 | 10255  | 5658  | 3516  |
| BRA | Brazil | 6548 | Andorinha         | 0.22 | 0.60 | 0.80 | 8159   | 2897  | 53    |
| BRA | Brazil | 6549 | Angical           | 0.17 | 0.49 | 0.65 | 9550   | 4667  | 2278  |
| BRA | Brazil | 6550 | Anguera           | 0.08 | 0.40 | 0.55 | 7732   | 4266  | 2651  |
| BRA | Brazil | 6551 | Antas             | 0.08 | 0.40 | 0.55 | 13277  | 7325  | 4552  |
| BRA | Brazil | 6552 | Antonio Cardoso   | 0.08 | 0.40 | 0.55 | 8498   | 4689  | 2914  |
| BRA | Brazil | 6553 | Antonio Goncalves | 0.08 | 0.40 | 0.55 | 9683   | 5342  | 3320  |
| BRA | Brazil | 6554 | Apora             | 0.08 | 0.40 | 0.55 | 14028  | 7740  | 4810  |
| BRA | Brazil | 6555 | Apuarema          | 0.08 | 0.40 | 0.55 | 5136   | 2834  | 1761  |
| BRA | Brazil | 6556 | Aracas            | 0.08 | 0.40 | 0.55 | 8452   | 4663  | 2898  |
| BRA | Brazil | 6557 | Aracatu           | 0.08 | 0.40 | 0.55 | 28011  | 15454 | 9604  |
| BRA | Brazil | 6558 | Araci             | 0.08 | 0.40 | 0.55 | 40059  | 22101 | 13735 |
| BRA | Brazil | 6559 | Aramari           | 0.08 | 0.40 | 0.55 | 7993   | 4410  | 2741  |
| BRA | Brazil | 6560 | Arataca           | 0.08 | 0.40 | 0.55 | 7673   | 4233  | 2631  |
| BRA | Brazil | 6561 | Aratuípe          | 0.08 | 0.40 | 0.55 | 6164   | 3401  | 2113  |
| BRA | Brazil | 6562 | Aurelino Leal     | 0.24 | 0.62 | 0.83 | 7807   | 2510  | 0     |
| BRA | Brazil | 6563 | Baianopolis       | 0.17 | 0.49 | 0.65 | 9433   | 4609  | 2251  |
| BRA | Brazil | 6564 | Baixa Grande      | 0.08 | 0.40 | 0.55 | 14953  | 8250  | 5127  |
| BRA | Brazil | 6565 | Banzae            | 0.25 | 0.69 | 0.95 | 6204   | 1235  | 0     |
| BRA | Brazil | 6566 | Barra             | 0.17 | 0.49 | 0.65 | 35023  | 17113 | 8356  |
| BRA | Brazil | 6567 | Barra Da Estiva   | 0.08 | 0.40 | 0.55 | 14941  | 8243  | 5123  |
| BRA | Brazil | 6568 | Barra Do Choca    | 0.08 | 0.40 | 0.55 | 24611  | 13578 | 8438  |
| BRA | Brazil | 6569 | Barra Do Mendes   | 0.08 | 0.40 | 0.55 | 11879  | 6554  | 4073  |
| BRA | Brazil | 6570 | Barra Do Rocha    | 0.34 | 0.80 | 0.98 | 2336   | 0     | 0     |
| BRA | Brazil | 6571 | Barreiras         | 0.17 | 0.49 | 0.65 | 157385 | 76905 | 37548 |
| BRA | Brazil | 6572 | Barro Alto        | 0.45 | 0.73 | 0.86 | 4073   | 860   | 0     |
| BRA | Brazil | 6573 | Barro Preto       | 0.08 | 0.40 | 0.55 | 3235   | 1785  | 1109  |
| BRA | Brazil | 6574 | Belmonte          | 0.08 | 0.40 | 0.55 | 16452  | 9077  | 5641  |
| BRA | Brazil | 6575 | Belo Campo        | 0.08 | 0.40 | 0.55 | 10557  | 5824  | 3619  |
| BRA | Brazil | 6576 | Biritinga         | 0.08 | 0.40 | 0.55 | 11325  | 6248  | 3883  |
| BRA | Brazil | 6577 | Boa Nova          | 0.08 | 0.40 | 0.55 | 10506  | 5797  | 3602  |

|     |        |      |                         |      |      |      |        |        |       |
|-----|--------|------|-------------------------|------|------|------|--------|--------|-------|
| BRA | Brazil | 6578 | Boa Vista Do Tupim      | 0.23 | 0.62 | 0.85 | 10529  | 3229   | 0     |
| BRA | Brazil | 6579 | Bom Jesus Da Lapa       | 0.17 | 0.49 | 0.65 | 43721  | 21364  | 10431 |
| BRA | Brazil | 6580 | Bom Jesus Da Serra      | 0.08 | 0.40 | 0.55 | 7106   | 3921   | 2436  |
| BRA | Brazil | 6581 | Boninal                 | 0.08 | 0.40 | 0.55 | 9405   | 5189   | 3225  |
| BRA | Brazil | 6582 | Bonito                  | 0.32 | 0.84 | 0.99 | 5871   | 0      | 0     |
| BRA | Brazil | 6583 | Boquira                 | 0.17 | 0.49 | 0.65 | 14827  | 7245   | 3537  |
| BRA | Brazil | 6584 | Botupora                | 0.08 | 0.40 | 0.55 | 7323   | 4040   | 2511  |
| BRA | Brazil | 6585 | Brejoes                 | 0.27 | 0.77 | 0.98 | 7343   | 408    | 0     |
| BRA | Brazil | 6586 | Brejolandia             | 0.17 | 0.49 | 0.65 | 7237   | 3536   | 1727  |
| BRA | Brazil | 6587 | Brotas De Macaubas      | 0.17 | 0.49 | 0.65 | 6903   | 3373   | 1647  |
| BRA | Brazil | 6588 | Brumado                 | 0.08 | 0.40 | 0.55 | 48790  | 26919  | 16729 |
| BRA | Brazil | 6589 | Buerarema               | 0.25 | 0.71 | 0.95 | 10187  | 1723   | 0     |
| BRA | Brazil | 6590 | Buritirama              | 0.17 | 0.49 | 0.65 | 13199  | 6450   | 3149  |
| BRA | Brazil | 6591 | Caatiba                 | 0.08 | 0.40 | 0.55 | 7960   | 4392   | 2729  |
| BRA | Brazil | 6592 | Cabaceiras Do Paraguacu | 0.08 | 0.40 | 0.55 | 12781  | 7051   | 4382  |
| BRA | Brazil | 6593 | Cachoeira               | 0.08 | 0.40 | 0.55 | 26458  | 14598  | 9072  |
| BRA | Brazil | 6594 | Cacule                  | 0.08 | 0.40 | 0.55 | 17089  | 9428   | 5859  |
| BRA | Brazil | 6595 | Caem                    | 0.08 | 0.40 | 0.55 | 6993   | 3858   | 2398  |
| BRA | Brazil | 6596 | Caetite                 | 0.08 | 0.40 | 0.55 | 37344  | 20604  | 12804 |
| BRA | Brazil | 6597 | Cafarnaum               | 0.08 | 0.40 | 0.55 | 16769  | 9252   | 5750  |
| BRA | Brazil | 6598 | Cairu                   | 0.08 | 0.40 | 0.55 | 12454  | 6871   | 4270  |
| BRA | Brazil | 6599 | Caldeirao Grande        | 0.08 | 0.40 | 0.55 | 10529  | 5809   | 3610  |
| BRA | Brazil | 6600 | Camacan                 | 0.08 | 0.40 | 0.55 | 23746  | 13101  | 8142  |
| BRA | Brazil | 6601 | Camacari                | 0.08 | 0.40 | 0.55 | 222557 | 122791 | 76308 |
| BRA | Brazil | 6602 | Camamu                  | 0.24 | 0.65 | 0.89 | 20293  | 5337   | 0     |
| BRA | Brazil | 6603 | Campo Alegre De Lourdes | 0.17 | 0.49 | 0.65 | 18463  | 9022   | 4405  |
| BRA | Brazil | 6604 | Campo Formoso           | 0.22 | 0.60 | 0.80 | 39942  | 14085  | 332   |
| BRA | Brazil | 6605 | Canapolis               | 0.56 | 0.88 | 0.99 | 2324   | 0      | 0     |
| BRA | Brazil | 6606 | Canarana                | 0.30 | 0.71 | 0.95 | 14285  | 2590   | 0     |
| BRA | Brazil | 6607 | Canavieiras             | 0.08 | 0.40 | 0.55 | 23003  | 12691  | 7887  |
| BRA | Brazil | 6608 | Candeal                 | 0.08 | 0.40 | 0.55 | 6242   | 3444   | 2140  |
| BRA | Brazil | 6609 | Candeias                | 0.10 | 0.44 | 0.62 | 61203  | 30998  | 15823 |
| BRA | Brazil | 6610 | Candiba                 | 0.08 | 0.40 | 0.55 | 10093  | 5569   | 3461  |

|     |        |      |                       |      |      |      |       |       |       |
|-----|--------|------|-----------------------|------|------|------|-------|-------|-------|
| BRA | Brazil | 6611 | Candido Sales         | 0.08 | 0.40 | 0.55 | 17721 | 9777  | 6076  |
| BRA | Brazil | 6612 | Cansancao             | 0.08 | 0.40 | 0.55 | 24766 | 13664 | 8491  |
| BRA | Brazil | 6613 | Canudos               | 0.08 | 0.40 | 0.55 | 12355 | 6816  | 4236  |
| BRA | Brazil | 6614 | Capela Do Alto Alegre | 0.08 | 0.40 | 0.55 | 8524  | 4703  | 2923  |
| BRA | Brazil | 6615 | Capim Grosso          | 0.08 | 0.40 | 0.55 | 20973 | 11571 | 7191  |
| BRA | Brazil | 6616 | Caravelas             | 0.08 | 0.40 | 0.55 | 16446 | 9074  | 5639  |
| BRA | Brazil | 6617 | Cardeal Da Silva      | 0.23 | 0.61 | 0.83 | 4597  | 1504  | 0     |
| BRA | Brazil | 6618 | Carinhanha            | 0.43 | 0.81 | 1.00 | 10905 | 0     | 0     |
| BRA | Brazil | 6619 | Casa Nova             | 0.17 | 0.49 | 0.65 | 45668 | 22315 | 10895 |
| BRA | Brazil | 6620 | Castro Alves          | 0.21 | 0.61 | 0.84 | 16281 | 5344  | 0     |
| BRA | Brazil | 6621 | Catolandia            | 0.17 | 0.49 | 0.65 | 1786  | 873   | 426   |
| BRA | Brazil | 6622 | Catu                  | 0.08 | 0.40 | 0.55 | 40941 | 22588 | 14037 |
| BRA | Brazil | 6623 | Caturama              | 0.08 | 0.40 | 0.55 | 7133  | 3935  | 2446  |
| BRA | Brazil | 6624 | Central               | 0.17 | 0.49 | 0.65 | 9060  | 4427  | 2161  |
| BRA | Brazil | 6625 | Chorrocho             | 0.08 | 0.40 | 0.55 | 8161  | 4503  | 2798  |
| BRA | Brazil | 6626 | Cicero Dantas         | 0.08 | 0.40 | 0.55 | 26096 | 14398 | 8947  |
| BRA | Brazil | 6627 | Cipo                  | 0.08 | 0.40 | 0.55 | 12355 | 6817  | 4236  |
| BRA | Brazil | 6628 | Coaraci               | 0.25 | 0.69 | 0.93 | 10340 | 2055  | 0     |
| BRA | Brazil | 6629 | Cocos                 | 0.17 | 0.49 | 0.65 | 12013 | 5870  | 2866  |
| BRA | Brazil | 6630 | Conceicao Da Feira    | 0.08 | 0.40 | 0.55 | 15624 | 8620  | 5357  |
| BRA | Brazil | 6631 | Conceicao Do Almeida  | 0.08 | 0.40 | 0.55 | 13758 | 7591  | 4717  |
| BRA | Brazil | 6632 | Conceicao Do Coite    | 0.08 | 0.40 | 0.55 | 49440 | 27277 | 16951 |
| BRA | Brazil | 6633 | Conceicao Do Jacuipe  | 0.08 | 0.40 | 0.55 | 15705 | 8665  | 5385  |
| BRA | Brazil | 6634 | Conde                 | 0.08 | 0.40 | 0.55 | 18562 | 10241 | 6364  |
| BRA | Brazil | 6635 | Condeuba              | 0.08 | 0.40 | 0.55 | 12176 | 6718  | 4175  |
| BRA | Brazil | 6636 | Contendas Do Sincora  | 0.08 | 0.40 | 0.55 | 3221  | 1777  | 1104  |
| BRA | Brazil | 6637 | Coracao De Maria      | 0.08 | 0.40 | 0.55 | 17814 | 9828  | 6108  |
| BRA | Brazil | 6638 | Cordeiros             | 0.28 | 0.68 | 0.93 | 4585  | 1039  | 0     |
| BRA | Brazil | 6639 | Coribe                | 0.17 | 0.49 | 0.65 | 9056  | 4425  | 2161  |
| BRA | Brazil | 6640 | Coronel Joao Sa       | 0.24 | 0.65 | 0.88 | 9030  | 2479  | 0     |
| BRA | Brazil | 6641 | Correntina            | 0.36 | 0.78 | 1.00 | 13916 | 626   | 0     |
| BRA | Brazil | 6642 | Cotegipe              | 0.17 | 0.49 | 0.65 | 9176  | 4484  | 2189  |
| BRA | Brazil | 6643 | Cravolandia           | 0.08 | 0.40 | 0.55 | 3503  | 1932  | 1201  |

|     |        |      |                       |      |      |      |        |        |        |
|-----|--------|------|-----------------------|------|------|------|--------|--------|--------|
| BRA | Brazil | 6644 | Crisopolis            | 0.24 | 0.63 | 0.87 | 11262  | 3448   | 0      |
| BRA | Brazil | 6645 | Cristopolis           | 0.17 | 0.49 | 0.65 | 7520   | 3675   | 1794   |
| BRA | Brazil | 6646 | Cruz Das Almas        | 0.08 | 0.40 | 0.55 | 47969  | 26466  | 16447  |
| BRA | Brazil | 6647 | Curaca                | 0.08 | 0.40 | 0.55 | 24673  | 13613  | 8460   |
| BRA | Brazil | 6648 | Dario Meira           | 0.08 | 0.40 | 0.55 | 7211   | 3979   | 2472   |
| BRA | Brazil | 6649 | Dias D'avila          | 0.08 | 0.40 | 0.55 | 59074  | 32592  | 20254  |
| BRA | Brazil | 6650 | Dom Basilio           | 0.08 | 0.40 | 0.55 | 8571   | 4729   | 2939   |
| BRA | Brazil | 6651 | Dom Macedo Costa      | 0.08 | 0.40 | 0.55 | 2925   | 1614   | 1003   |
| BRA | Brazil | 6652 | Elisio Medrado        | 0.08 | 0.40 | 0.55 | 6036   | 3330   | 2069   |
| BRA | Brazil | 6653 | Encruzilhada          | 0.08 | 0.40 | 0.55 | 17268  | 9527   | 5921   |
| BRA | Brazil | 6654 | Entre Rios            | 0.08 | 0.40 | 0.55 | 28009  | 15453  | 9603   |
| BRA | Brazil | 6655 | Erico Cardoso         | 0.08 | 0.40 | 0.55 | 7561   | 4171   | 2592   |
| BRA | Brazil | 6656 | Esplanada             | 0.08 | 0.40 | 0.55 | 28048  | 15475  | 9617   |
| BRA | Brazil | 6657 | Euclides Da Cunha     | 0.08 | 0.40 | 0.55 | 45065  | 24863  | 15451  |
| BRA | Brazil | 6658 | Eunapolis             | 0.08 | 0.40 | 0.55 | 81332  | 44873  | 27886  |
| BRA | Brazil | 6659 | Fatima                | 0.39 | 0.83 | 0.97 | 6476   | 0      | 0      |
| BRA | Brazil | 6660 | Feira Da Mata         | 0.17 | 0.49 | 0.65 | 4307   | 2105   | 1028   |
| BRA | Brazil | 6661 | Feira De Santana      | 0.08 | 0.40 | 0.55 | 449072 | 247765 | 153972 |
| BRA | Brazil | 6662 | Filadelfia            | 0.17 | 0.60 | 0.86 | 11240  | 3484   | 0      |
| BRA | Brazil | 6663 | Firmino Alves         | 0.08 | 0.40 | 0.55 | 4084   | 2253   | 1400   |
| BRA | Brazil | 6664 | Floresta Azul         | 0.24 | 0.65 | 0.91 | 6039   | 1619   | 0      |
| BRA | Brazil | 6665 | Formosa Do Rio Preto  | 0.17 | 0.49 | 0.65 | 16147  | 7890   | 3852   |
| BRA | Brazil | 6666 | Gandu                 | 0.08 | 0.40 | 0.55 | 23664  | 13056  | 8113   |
| BRA | Brazil | 6667 | Gaviao                | 0.08 | 0.40 | 0.55 | 2934   | 1619   | 1006   |
| BRA | Brazil | 6668 | Gentio Do Ouro        | 0.17 | 0.49 | 0.65 | 7117   | 3478   | 1698   |
| BRA | Brazil | 6669 | Gloria                | 0.08 | 0.40 | 0.55 | 10352  | 5712   | 3549   |
| BRA | Brazil | 6670 | Gongogi               | 0.08 | 0.40 | 0.55 | 5368   | 2962   | 1841   |
| BRA | Brazil | 6671 | Governador Mangabeira | 0.08 | 0.40 | 0.55 | 14041  | 7747   | 4814   |
| BRA | Brazil | 6672 | Guajeru               | 0.08 | 0.40 | 0.55 | 5319   | 2935   | 1824   |
| BRA | Brazil | 6673 | Guanambi              | 0.08 | 0.40 | 0.55 | 60134  | 33177  | 20618  |
| BRA | Brazil | 6674 | Guaratinga            | 0.17 | 0.49 | 0.65 | 14734  | 7200   | 3515   |
| BRA | Brazil | 6675 | Heliopolis            | 0.08 | 0.40 | 0.55 | 9463   | 5221   | 3245   |
| BRA | Brazil | 6676 | Iacu                  | 0.08 | 0.40 | 0.55 | 17793  | 9817   | 6101   |

|     |        |      |              |      |      |      |        |       |       |
|-----|--------|------|--------------|------|------|------|--------|-------|-------|
| BRA | Brazil | 6677 | Ibiassuce    | 0.08 | 0.40 | 0.55 | 6454   | 3561  | 2213  |
| BRA | Brazil | 6678 | Ibicarai     | 0.08 | 0.40 | 0.55 | 16398  | 9047  | 5622  |
| BRA | Brazil | 6679 | Ibicoara     | 0.08 | 0.40 | 0.55 | 14263  | 7869  | 4890  |
| BRA | Brazil | 6680 | Ibicui       | 0.08 | 0.40 | 0.55 | 12416  | 6850  | 4257  |
| BRA | Brazil | 6681 | Ibipeba      | 0.08 | 0.40 | 0.55 | 13083  | 7218  | 4486  |
| BRA | Brazil | 6682 | Ibipitanga   | 0.08 | 0.40 | 0.55 | 10619  | 5859  | 3641  |
| BRA | Brazil | 6683 | Ibiquera     | 0.08 | 0.40 | 0.55 | 3806   | 2100  | 1305  |
| BRA | Brazil | 6684 | Ibirapitanga | 0.08 | 0.40 | 0.55 | 16906  | 9327  | 5796  |
| BRA | Brazil | 6685 | Ibirapua     | 0.08 | 0.40 | 0.55 | 6271   | 3460  | 2150  |
| BRA | Brazil | 6686 | Ibirataia    | 0.08 | 0.40 | 0.55 | 11917  | 6575  | 4086  |
| BRA | Brazil | 6687 | Ibitiara     | 0.08 | 0.40 | 0.55 | 11534  | 6363  | 3955  |
| BRA | Brazil | 6688 | Ibitita      | 0.20 | 0.56 | 0.74 | 11104  | 4547  | 1154  |
| BRA | Brazil | 6689 | Ibotirama    | 0.17 | 0.49 | 0.65 | 16550  | 8087  | 3948  |
| BRA | Brazil | 6690 | Ichu         | 0.08 | 0.40 | 0.55 | 4215   | 2325  | 1445  |
| BRA | Brazil | 6691 | Igapora      | 0.08 | 0.40 | 0.55 | 11271  | 6219  | 3865  |
| BRA | Brazil | 6692 | Igrapiuna    | 0.08 | 0.40 | 0.55 | 8999   | 4965  | 3085  |
| BRA | Brazil | 6693 | Iguai        | 0.08 | 0.40 | 0.55 | 19456  | 10734 | 6671  |
| BRA | Brazil | 6694 | Ilheus       | 0.08 | 0.40 | 0.55 | 124512 | 68696 | 42691 |
| BRA | Brazil | 6695 | Inhambupe    | 0.08 | 0.40 | 0.55 | 30447  | 16798 | 10439 |
| BRA | Brazil | 6696 | Ipecaeta     | 0.08 | 0.40 | 0.55 | 11022  | 6081  | 3779  |
| BRA | Brazil | 6697 | Ipiaú        | 0.08 | 0.40 | 0.55 | 29699  | 16386 | 10183 |
| BRA | Brazil | 6698 | Ipira        | 0.08 | 0.41 | 0.57 | 43896  | 23613 | 13979 |
| BRA | Brazil | 6699 | Ipupiara     | 0.17 | 0.49 | 0.65 | 6154   | 3007  | 1468  |
| BRA | Brazil | 6700 | Irajuba      | 0.08 | 0.40 | 0.55 | 5193   | 2865  | 1781  |
| BRA | Brazil | 6701 | Iramaia      | 0.08 | 0.40 | 0.55 | 7447   | 4109  | 2553  |
| BRA | Brazil | 6702 | Iraquara     | 0.08 | 0.40 | 0.55 | 15541  | 8574  | 5328  |
| BRA | Brazil | 6703 | Irara        | 0.08 | 0.40 | 0.55 | 20369  | 11238 | 6984  |
| BRA | Brazil | 6704 | Irece        | 0.08 | 0.40 | 0.55 | 53322  | 29419 | 18282 |
| BRA | Brazil | 6705 | Itabela      | 0.08 | 0.40 | 0.55 | 22035  | 12157 | 7555  |
| BRA | Brazil | 6706 | Itaberaba    | 0.08 | 0.40 | 0.55 | 47173  | 26026 | 16174 |
| BRA | Brazil | 6707 | Itabuna      | 0.08 | 0.40 | 0.55 | 155717 | 85913 | 53390 |
| BRA | Brazil | 6708 | Itacare      | 0.08 | 0.40 | 0.55 | 20734  | 11439 | 7109  |
| BRA | Brazil | 6709 | Itaete       | 0.08 | 0.40 | 0.55 | 10812  | 5965  | 3707  |

|     |        |      |                   |      |      |      |       |       |       |
|-----|--------|------|-------------------|------|------|------|-------|-------|-------|
| BRA | Brazil | 6710 | Itagi             | 0.08 | 0.40 | 0.55 | 9323  | 5144  | 3196  |
| BRA | Brazil | 6711 | Itagiba           | 0.08 | 0.40 | 0.55 | 15090 | 8325  | 5174  |
| BRA | Brazil | 6712 | Itagimirim        | 0.34 | 0.74 | 0.97 | 3256  | 400   | 0     |
| BRA | Brazil | 6713 | Itaguacu Da Bahia | 0.17 | 0.49 | 0.65 | 10748 | 5252  | 2564  |
| BRA | Brazil | 6714 | Itaju Do Colonia  | 0.08 | 0.40 | 0.55 | 4621  | 2549  | 1584  |
| BRA | Brazil | 6715 | Itajuipe          | 0.08 | 0.40 | 0.55 | 15206 | 8389  | 5213  |
| BRA | Brazil | 6716 | Itamaraju         | 0.08 | 0.40 | 0.55 | 46386 | 25592 | 15904 |
| BRA | Brazil | 6717 | Itamari           | 0.08 | 0.40 | 0.55 | 6042  | 3333  | 2072  |
| BRA | Brazil | 6718 | Itambe            | 0.11 | 0.51 | 0.74 | 15414 | 6562  | 1435  |
| BRA | Brazil | 6719 | Itanagra          | 0.08 | 0.40 | 0.55 | 5099  | 2813  | 1748  |
| BRA | Brazil | 6720 | Itanhem           | 0.17 | 0.49 | 0.65 | 13434 | 6564  | 3205  |
| BRA | Brazil | 6721 | Itaparica         | 0.08 | 0.40 | 0.55 | 13837 | 7634  | 4744  |
| BRA | Brazil | 6722 | Itape             | 0.08 | 0.40 | 0.55 | 7395  | 4080  | 2535  |
| BRA | Brazil | 6723 | Itapebi           | 0.08 | 0.40 | 0.55 | 7562  | 4172  | 2593  |
| BRA | Brazil | 6724 | Itapetinga        | 0.08 | 0.40 | 0.55 | 55428 | 30581 | 19005 |
| BRA | Brazil | 6725 | Itapicuru         | 0.08 | 0.40 | 0.55 | 25248 | 13930 | 8657  |
| BRA | Brazil | 6726 | Itapitanga        | 0.08 | 0.40 | 0.55 | 7547  | 4164  | 2587  |
| BRA | Brazil | 6727 | Itaquara          | 0.08 | 0.40 | 0.55 | 6100  | 3365  | 2091  |
| BRA | Brazil | 6728 | Itarantim         | 0.08 | 0.40 | 0.55 | 15286 | 8434  | 5241  |
| BRA | Brazil | 6729 | Itatim            | 0.08 | 0.40 | 0.55 | 11463 | 6325  | 3930  |
| BRA | Brazil | 6730 | Itirucu           | 0.08 | 0.40 | 0.55 | 11873 | 6551  | 4071  |
| BRA | Brazil | 6731 | Itiuba            | 0.08 | 0.40 | 0.55 | 27241 | 15030 | 9340  |
| BRA | Brazil | 6732 | Itororo           | 0.08 | 0.40 | 0.55 | 15011 | 8282  | 5147  |
| BRA | Brazil | 6733 | Ituacu            | 0.08 | 0.40 | 0.55 | 13966 | 7706  | 4789  |
| BRA | Brazil | 6734 | Itubera           | 0.24 | 0.64 | 0.89 | 15454 | 4295  | 0     |
| BRA | Brazil | 6735 | Iuiu              | 0.23 | 0.63 | 0.86 | 6002  | 1837  | 0     |
| BRA | Brazil | 6736 | Jaborandi         | 0.27 | 0.76 | 0.95 | 5479  | 466   | 0     |
| BRA | Brazil | 6737 | Jacaraci          | 0.08 | 0.40 | 0.55 | 10251 | 5656  | 3515  |
| BRA | Brazil | 6738 | Jacobina          | 0.08 | 0.40 | 0.55 | 59868 | 33031 | 20527 |
| BRA | Brazil | 6739 | Jaguaquara        | 0.08 | 0.40 | 0.55 | 39445 | 21763 | 13525 |
| BRA | Brazil | 6740 | Jaguarari         | 0.08 | 0.40 | 0.55 | 24737 | 13648 | 8481  |
| BRA | Brazil | 6741 | Jaguaripe         | 0.08 | 0.40 | 0.55 | 13450 | 7421  | 4612  |
| BRA | Brazil | 6742 | Jandaira          | 0.08 | 0.40 | 0.55 | 8010  | 4419  | 2746  |



|     |        |      |                       |      |      |      |        |       |       |
|-----|--------|------|-----------------------|------|------|------|--------|-------|-------|
| BRA | Brazil | 6743 | Jequie                | 0.08 | 0.40 | 0.55 | 113910 | 62847 | 39056 |
| BRA | Brazil | 6744 | Jeremoabo             | 0.08 | 0.40 | 0.55 | 28959  | 15977 | 9929  |
| BRA | Brazil | 6745 | Jiquirica             | 0.08 | 0.40 | 0.55 | 10454  | 5768  | 3584  |
| BRA | Brazil | 6746 | Jitauna               | 0.08 | 0.40 | 0.55 | 8950   | 4938  | 3069  |
| BRA | Brazil | 6747 | Joao Dourado          | 0.08 | 0.40 | 0.55 | 19348  | 10675 | 6634  |
| BRA | Brazil | 6748 | Juazeiro              | 0.08 | 0.40 | 0.55 | 155435 | 85757 | 53294 |
| BRA | Brazil | 6749 | Jucuruçu              | 0.17 | 0.49 | 0.65 | 6628   | 3239  | 1581  |
| BRA | Brazil | 6750 | Jussara               | 0.47 | 0.88 | 1.00 | 4733   | 0     | 0     |
| BRA | Brazil | 6751 | Jussari               | 0.08 | 0.40 | 0.55 | 5138   | 2835  | 1762  |
| BRA | Brazil | 6752 | Jussiape              | 0.08 | 0.40 | 0.55 | 4948   | 2730  | 1697  |
| BRA | Brazil | 6753 | Lafaiete Coutinho     | 0.08 | 0.40 | 0.55 | 2469   | 1362  | 847   |
| BRA | Brazil | 6754 | Lagoa Real            | 0.08 | 0.40 | 0.55 | 11285  | 6226  | 3869  |
| BRA | Brazil | 6755 | Laje                  | 0.08 | 0.40 | 0.55 | 18549  | 10234 | 6360  |
| BRA | Brazil | 6756 | Lajedao               | 0.08 | 0.40 | 0.55 | 2813   | 1552  | 964   |
| BRA | Brazil | 6757 | Lajedinho             | 0.08 | 0.40 | 0.55 | 2777   | 1532  | 952   |
| BRA | Brazil | 6758 | Lajedo Do Tabocal     | 0.08 | 0.40 | 0.55 | 3759   | 2074  | 1289  |
| BRA | Brazil | 6759 | Lamarao               | 0.08 | 0.40 | 0.55 | 7672   | 4233  | 2631  |
| BRA | Brazil | 6760 | Lapao                 | 0.08 | 0.40 | 0.55 | 19483  | 10749 | 6680  |
| BRA | Brazil | 6761 | Lauro De Freitas      | 0.08 | 0.40 | 0.55 | 130979 | 72264 | 44908 |
| BRA | Brazil | 6762 | Lençois               | 0.08 | 0.40 | 0.55 | 8266   | 4560  | 2834  |
| BRA | Brazil | 6763 | Licínio De Almeida    | 0.08 | 0.40 | 0.55 | 9378   | 5174  | 3216  |
| BRA | Brazil | 6764 | Livramento Do Brumado | 0.23 | 0.70 | 0.92 | 27398  | 4683  | 0     |
| BRA | Brazil | 6765 | Macajuba              | 0.08 | 0.40 | 0.55 | 8364   | 4614  | 2868  |
| BRA | Brazil | 6766 | Macarani              | 0.08 | 0.40 | 0.55 | 14559  | 8032  | 4992  |
| BRA | Brazil | 6767 | Macaubas              | 0.17 | 0.49 | 0.65 | 32810  | 16032 | 7828  |
| BRA | Brazil | 6768 | Macurure              | 0.08 | 0.40 | 0.55 | 5737   | 3165  | 1967  |
| BRA | Brazil | 6769 | Madre De Deus         | 0.08 | 0.40 | 0.55 | 15152  | 8360  | 5195  |
| BRA | Brazil | 6770 | Maetinga              | 0.08 | 0.40 | 0.55 | 3102   | 1711  | 1063  |
| BRA | Brazil | 6771 | Maiquínique           | 0.08 | 0.40 | 0.55 | 6032   | 3328  | 2068  |
| BRA | Brazil | 6772 | Mairi                 | 0.28 | 0.76 | 0.94 | 9827   | 734   | 0     |
| BRA | Brazil | 6773 | Malhada               | 0.17 | 0.49 | 0.65 | 11068  | 5408  | 2641  |
| BRA | Brazil | 6774 | Malhada De Pedras     | 0.08 | 0.40 | 0.55 | 5852   | 3229  | 2007  |
| BRA | Brazil | 6775 | Manoel Vitorino       | 0.25 | 0.67 | 0.94 | 8403   | 1909  | 0     |

|     |        |      |                         |      |      |      |       |       |       |
|-----|--------|------|-------------------------|------|------|------|-------|-------|-------|
| BRA | Brazil | 6776 | Mansidao                | 0.17 | 0.49 | 0.65 | 8697  | 4250  | 2075  |
| BRA | Brazil | 6777 | Maracas                 | 0.08 | 0.40 | 0.55 | 16450 | 9076  | 5640  |
| BRA | Brazil | 6778 | Maragogipe              | 0.08 | 0.40 | 0.55 | 32612 | 17993 | 11181 |
| BRA | Brazil | 6779 | Marau                   | 1.00 | 1.00 | 1.00 | 0     | 0     | 0     |
| BRA | Brazil | 6780 | Marcionilio Souza       | 0.08 | 0.40 | 0.55 | 7560  | 4171  | 2592  |
| BRA | Brazil | 6781 | Mascote                 | 0.08 | 0.40 | 0.55 | 10442 | 5761  | 3580  |
| BRA | Brazil | 6782 | Mata De Sao Joao        | 0.08 | 0.40 | 0.55 | 40706 | 22458 | 13957 |
| BRA | Brazil | 6783 | Matina                  | 0.08 | 0.40 | 0.55 | 8931  | 4927  | 3062  |
| BRA | Brazil | 6784 | Medeiros Neto           | 0.08 | 0.40 | 0.55 | 15999 | 8827  | 5486  |
| BRA | Brazil | 6785 | Miguel Calmon           | 0.08 | 0.40 | 0.55 | 19216 | 10602 | 6589  |
| BRA | Brazil | 6786 | Milagres                | 0.08 | 0.40 | 0.55 | 6899  | 3806  | 2365  |
| BRA | Brazil | 6787 | Mirangaba               | 0.08 | 0.40 | 0.55 | 13346 | 7364  | 4576  |
| BRA | Brazil | 6788 | Mirante                 | 0.08 | 0.40 | 0.55 | 5941  | 3278  | 2037  |
| BRA | Brazil | 6789 | Monte Santo             | 0.24 | 0.61 | 0.81 | 29891 | 10008 | 0     |
| BRA | Brazil | 6790 | Morpara                 | 0.17 | 0.49 | 0.65 | 5182  | 2532  | 1236  |
| BRA | Brazil | 6791 | Morro Do Chapau         | 0.08 | 0.40 | 0.55 | 27915 | 15402 | 9571  |
| BRA | Brazil | 6792 | Mortugaba               | 0.08 | 0.40 | 0.55 | 9555  | 5272  | 3276  |
| BRA | Brazil | 6793 | Mucuge                  | 0.08 | 0.40 | 0.55 | 7008  | 3867  | 2403  |
| BRA | Brazil | 6794 | Mucuri                  | 0.08 | 0.40 | 0.55 | 30043 | 16576 | 10301 |
| BRA | Brazil | 6795 | Mulungu Do Morro        | 0.08 | 0.40 | 0.55 | 7493  | 4134  | 2569  |
| BRA | Brazil | 6796 | Mundo Novo              | 0.50 | 0.77 | 0.93 | 7989  | 898   | 0     |
| BRA | Brazil | 6797 | Muniz Ferreira          | 0.19 | 0.60 | 0.85 | 4840  | 1579  | 0     |
| BRA | Brazil | 6798 | Muquem De Sao Francisco | 0.17 | 0.49 | 0.65 | 5734  | 2802  | 1368  |
| BRA | Brazil | 6799 | Muritiba                | 0.08 | 0.40 | 0.55 | 24478 | 13505 | 8393  |
| BRA | Brazil | 6800 | Mutuipe                 | 0.08 | 0.40 | 0.55 | 16253 | 8967  | 5573  |
| BRA | Brazil | 6801 | Nazare                  | 0.10 | 0.47 | 0.66 | 20397 | 9715  | 4111  |
| BRA | Brazil | 6802 | Nilo Pecanha            | 0.08 | 0.40 | 0.55 | 9967  | 5499  | 3418  |
| BRA | Brazil | 6803 | Nordestina              | 0.08 | 0.40 | 0.55 | 9302  | 5132  | 3189  |
| BRA | Brazil | 6804 | Nova Canaa              | 0.08 | 0.40 | 0.55 | 9017  | 4975  | 3092  |
| BRA | Brazil | 6805 | Nova Fatima             | 0.29 | 0.71 | 0.96 | 4136  | 714   | 0     |
| BRA | Brazil | 6806 | Nova Ibia               | 0.08 | 0.40 | 0.55 | 4731  | 2610  | 1622  |
| BRA | Brazil | 6807 | Nova Itarana            | 0.08 | 0.40 | 0.55 | 6082  | 3356  | 2085  |
| BRA | Brazil | 6808 | Nova Redencao           | 0.08 | 0.40 | 0.55 | 6400  | 3531  | 2194  |

|     |        |      |                        |      |      |      |        |       |       |
|-----|--------|------|------------------------|------|------|------|--------|-------|-------|
| BRA | Brazil | 6809 | Nova Soure             | 0.08 | 0.40 | 0.55 | 17276  | 9532  | 5923  |
| BRA | Brazil | 6810 | Nova Vicoso            | 0.08 | 0.40 | 0.55 | 31513  | 17387 | 10805 |
| BRA | Brazil | 6811 | Novo Horizonte         | 0.87 | 0.98 | 1.00 | 0      | 0     | 0     |
| BRA | Brazil | 6812 | Novo Triunfo           | 0.08 | 0.40 | 0.55 | 8961   | 4944  | 3072  |
| BRA | Brazil | 6813 | Olindina               | 0.08 | 0.40 | 0.55 | 18103  | 9988  | 6207  |
| BRA | Brazil | 6814 | Oliveira Dos Brejinhos | 0.17 | 0.49 | 0.65 | 14758  | 7211  | 3521  |
| BRA | Brazil | 6815 | Ouricangas             | 0.08 | 0.40 | 0.55 | 6624   | 3655  | 2271  |
| BRA | Brazil | 6816 | Ourolandia             | 0.08 | 0.40 | 0.55 | 10640  | 5871  | 3648  |
| BRA | Brazil | 6817 | Palmas De Monte Alto   | 0.08 | 0.40 | 0.55 | 15690  | 8657  | 5380  |
| BRA | Brazil | 6818 | Palmeiras              | 0.08 | 0.40 | 0.55 | 6740   | 3719  | 2311  |
| BRA | Brazil | 6819 | Paramirim              | 0.20 | 0.60 | 0.85 | 13621  | 4480  | 0     |
| BRA | Brazil | 6820 | Paratinga              | 0.17 | 0.49 | 0.65 | 19431  | 9495  | 4636  |
| BRA | Brazil | 6821 | Paripiranga            | 0.08 | 0.40 | 0.55 | 22998  | 12688 | 7885  |
| BRA | Brazil | 6822 | Pau Brasil             | 0.08 | 0.40 | 0.55 | 7345   | 4053  | 2519  |
| BRA | Brazil | 6823 | Paulo Afonso           | 0.08 | 0.40 | 0.55 | 85713  | 47290 | 29388 |
| BRA | Brazil | 6824 | Pe De Serra            | 0.08 | 0.40 | 0.55 | 9892   | 5458  | 3392  |
| BRA | Brazil | 6825 | Pedrao                 | 0.08 | 0.40 | 0.55 | 4475   | 2469  | 1534  |
| BRA | Brazil | 6826 | Pedro Alexandre        | 0.08 | 0.40 | 0.55 | 13901  | 7670  | 4766  |
| BRA | Brazil | 6827 | Piata                  | 0.24 | 0.60 | 0.79 | 9686   | 3356  | 199   |
| BRA | Brazil | 6828 | Pilao Arcado           | 0.17 | 0.49 | 0.65 | 22161  | 10829 | 5287  |
| BRA | Brazil | 6829 | Pindai                 | 0.08 | 0.40 | 0.55 | 11760  | 6488  | 4032  |
| BRA | Brazil | 6830 | Pindobacu              | 0.08 | 0.40 | 0.55 | 14438  | 7966  | 4950  |
| BRA | Brazil | 6831 | Pintadas               | 0.08 | 0.40 | 0.55 | 7352   | 4056  | 2521  |
| BRA | Brazil | 6832 | Pirai Do Norte         | 0.08 | 0.40 | 0.55 | 7825   | 4317  | 2683  |
| BRA | Brazil | 6833 | Piripa                 | 0.08 | 0.40 | 0.55 | 8686   | 4793  | 2978  |
| BRA | Brazil | 6834 | Piritiba               | 0.08 | 0.40 | 0.55 | 17751  | 9794  | 6086  |
| BRA | Brazil | 6835 | Planaltino             | 0.08 | 0.40 | 0.55 | 6880   | 3796  | 2359  |
| BRA | Brazil | 6836 | Planalto               | 0.30 | 0.77 | 0.94 | 14134  | 800   | 0     |
| BRA | Brazil | 6837 | Pocoos                 | 0.08 | 0.40 | 0.55 | 34789  | 19194 | 11928 |
| BRA | Brazil | 6838 | Pojuca                 | 0.08 | 0.40 | 0.55 | 24111  | 13302 | 8267  |
| BRA | Brazil | 6839 | Ponto Novo             | 0.08 | 0.40 | 0.55 | 9839   | 5429  | 3374  |
| BRA | Brazil | 6840 | Porto Seguro           | 0.08 | 0.40 | 0.55 | 107485 | 59302 | 36853 |
| BRA | Brazil | 6841 | Potiragua              | 0.08 | 0.40 | 0.55 | 4805   | 2651  | 1647  |

|     |        |      |                           |      |      |      |         |         |        |
|-----|--------|------|---------------------------|------|------|------|---------|---------|--------|
| BRA | Brazil | 6842 | Prado                     | 0.08 | 0.40 | 0.55 | 20083   | 11080   | 6886   |
| BRA | Brazil | 6843 | Presidente Dutra          | 0.50 | 0.83 | 0.99 | 4675    | 0       | 0      |
| BRA | Brazil | 6844 | Presidente Janio Quadros  | 0.08 | 0.40 | 0.55 | 9354    | 5161    | 3207   |
| BRA | Brazil | 6845 | Presidente Tancredo Neves | 0.08 | 0.40 | 0.55 | 19612   | 10820   | 6724   |
| BRA | Brazil | 6846 | Queimadas                 | 0.08 | 0.40 | 0.55 | 19042   | 10506   | 6529   |
| BRA | Brazil | 6847 | Quijingue                 | 0.08 | 0.40 | 0.55 | 20039   | 11056   | 6871   |
| BRA | Brazil | 6848 | Quixabeira                | 0.08 | 0.40 | 0.55 | 7187    | 3965    | 2464   |
| BRA | Brazil | 6849 | Rafael Jambeiro           | 0.22 | 0.68 | 0.93 | 14454   | 3064    | 0      |
| BRA | Brazil | 6850 | Remanso                   | 0.17 | 0.49 | 0.65 | 26343   | 12872   | 6285   |
| BRA | Brazil | 6851 | Retirolandia              | 0.23 | 0.65 | 0.91 | 8145    | 2101    | 0      |
| BRA | Brazil | 6852 | Riachao Das Neves         | 0.17 | 0.49 | 0.65 | 14166   | 6922    | 3380   |
| BRA | Brazil | 6853 | Riachao Do Jacuipe        | 0.08 | 0.40 | 0.55 | 25087   | 13841   | 8601   |
| BRA | Brazil | 6854 | Riacho De Santana         | 0.17 | 0.49 | 0.65 | 21009   | 10266   | 5012   |
| BRA | Brazil | 6855 | Ribeira Do Amparo         | 0.08 | 0.40 | 0.55 | 10434   | 5757    | 3578   |
| BRA | Brazil | 6856 | Ribeira Do Pombal         | 0.08 | 0.40 | 0.55 | 37148   | 20495   | 12737  |
| BRA | Brazil | 6857 | Ribeirao Do Largo         | 0.08 | 0.40 | 0.55 | 5217    | 2878    | 1789   |
| BRA | Brazil | 6858 | Rio De Contas             | 0.08 | 0.40 | 0.55 | 9365    | 5167    | 3211   |
| BRA | Brazil | 6859 | Rio Do Antonio            | 0.08 | 0.40 | 0.55 | 12027   | 6635    | 4124   |
| BRA | Brazil | 6860 | Rio Do Pires              | 0.08 | 0.40 | 0.55 | 8448    | 4661    | 2896   |
| BRA | Brazil | 6861 | Rio Real                  | 0.08 | 0.40 | 0.55 | 29326   | 16180   | 10055  |
| BRA | Brazil | 6862 | Rodelas                   | 0.08 | 0.40 | 0.55 | 6762    | 3731    | 2318   |
| BRA | Brazil | 6863 | Ruy Barbosa               | 0.08 | 0.40 | 0.55 | 22781   | 12569   | 7811   |
| BRA | Brazil | 6864 | Salinas Da Margarida      | 0.08 | 0.40 | 0.55 | 10930   | 6030    | 3747   |
| BRA | Brazil | 6865 | Salvador                  | 0.08 | 0.40 | 0.55 | 2028637 | 1119250 | 695553 |
| BRA | Brazil | 6866 | Santa Barbara             | 0.26 | 0.74 | 0.97 | 10703   | 1277    | 0      |
| BRA | Brazil | 6867 | Santa Brigida             | 0.08 | 0.40 | 0.55 | 10531   | 5810    | 3611   |
| BRA | Brazil | 6868 | Santa Cruz Cabralia       | 0.08 | 0.40 | 0.55 | 21084   | 11633   | 7229   |
| BRA | Brazil | 6869 | Santa Cruz Da Vitoria     | 0.08 | 0.40 | 0.55 | 4534    | 2501    | 1555   |
| BRA | Brazil | 6870 | Santa Ines                | 0.67 | 0.97 | 0.99 | 1425    | 0       | 0      |
| BRA | Brazil | 6871 | Santa Luzia               | 1.00 | 1.00 | 1.00 | 0       | 0       | 0      |
| BRA | Brazil | 6872 | Santa Maria Da Vitoria    | 0.30 | 0.72 | 0.98 | 20147   | 3063    | 0      |
| BRA | Brazil | 6873 | Santa Rita De Cassia      | 0.17 | 0.49 | 0.65 | 17960   | 8776    | 4285   |
| BRA | Brazil | 6874 | Santa Teresinha           | 0.08 | 0.40 | 0.55 | 7705    | 4251    | 2642   |

|     |        |      |                        |      |      |      |       |       |       |
|-----|--------|------|------------------------|------|------|------|-------|-------|-------|
| BRA | Brazil | 6875 | Santaluz               | 0.08 | 0.40 | 0.55 | 26391 | 14561 | 9049  |
| BRA | Brazil | 6876 | Santana                | 0.17 | 0.49 | 0.65 | 17012 | 8313  | 4059  |
| BRA | Brazil | 6877 | Santanopolis           | 0.20 | 0.58 | 0.79 | 5490  | 2014  | 92    |
| BRA | Brazil | 6878 | Santo Amaro            | 0.08 | 0.40 | 0.55 | 44363 | 24476 | 15211 |
| BRA | Brazil | 6879 | Santo Antonio De Jesus | 0.08 | 0.40 | 0.55 | 72833 | 40184 | 24972 |
| BRA | Brazil | 6880 | Santo Estevao          | 0.24 | 0.69 | 0.95 | 29885 | 5900  | 0     |
| BRA | Brazil | 6881 | Sao Desiderio          | 0.17 | 0.49 | 0.65 | 21501 | 10506 | 5130  |
| BRA | Brazil | 6882 | Sao Domingos           | 0.57 | 0.85 | 0.96 | 1877  | 0     | 0     |
| BRA | Brazil | 6883 | Sao Felipe             | 0.08 | 0.40 | 0.55 | 14849 | 8193  | 5091  |
| BRA | Brazil | 6884 | Sao Felix              | 0.23 | 0.65 | 0.89 | 6472  | 1727  | 0     |
| BRA | Brazil | 6885 | Sao Felix Do Coribe    | 0.17 | 0.49 | 0.65 | 8932  | 4365  | 2131  |
| BRA | Brazil | 6886 | Sao Francisco Do Conde | 0.08 | 0.40 | 0.55 | 23284 | 12846 | 7983  |
| BRA | Brazil | 6887 | Sao Gabriel            | 1.00 | 1.00 | 1.00 | 0     | 0     | 0     |
| BRA | Brazil | 6888 | Sao Goncalo Dos Campos | 0.08 | 0.40 | 0.55 | 24487 | 13510 | 8396  |
| BRA | Brazil | 6889 | Sao Jose Da Vitoria    | 0.08 | 0.40 | 0.55 | 3092  | 1706  | 1060  |
| BRA | Brazil | 6890 | Sao Jose Do Jacuipe    | 0.08 | 0.40 | 0.55 | 7863  | 4338  | 2696  |
| BRA | Brazil | 6891 | Sao Miguel Das Matas   | 0.08 | 0.40 | 0.55 | 7835  | 4323  | 2686  |
| BRA | Brazil | 6892 | Sao Sebastiao Do Passe | 0.08 | 0.40 | 0.55 | 32208 | 17770 | 11043 |
| BRA | Brazil | 6893 | Sapeacu                | 0.08 | 0.40 | 0.55 | 10357 | 5714  | 3551  |
| BRA | Brazil | 6894 | Satiro Dias            | 0.08 | 0.40 | 0.55 | 12454 | 6871  | 4270  |
| BRA | Brazil | 6895 | Saubara                | 0.08 | 0.40 | 0.55 | 8421  | 4646  | 2887  |
| BRA | Brazil | 6896 | Saude                  | 0.08 | 0.40 | 0.55 | 9090  | 5015  | 3117  |
| BRA | Brazil | 6897 | Seabra                 | 0.08 | 0.40 | 0.55 | 34628 | 19105 | 11873 |
| BRA | Brazil | 6898 | Sebastiao Laranjeiras  | 0.08 | 0.40 | 0.55 | 8446  | 4660  | 2896  |
| BRA | Brazil | 6899 | Senhor Do Bonfim       | 0.23 | 0.60 | 0.79 | 45141 | 15629 | 438   |
| BRA | Brazil | 6900 | Sento Se               | 0.31 | 0.68 | 0.90 | 20435 | 5074  | 0     |
| BRA | Brazil | 6901 | Serra Do Ramalho       | 0.33 | 0.74 | 1.00 | 16044 | 1980  | 0     |
| BRA | Brazil | 6902 | Serra Dourada          | 0.17 | 0.49 | 0.65 | 11027 | 5388  | 2631  |
| BRA | Brazil | 6903 | Serra Preta            | 0.08 | 0.40 | 0.55 | 10075 | 5558  | 3454  |
| BRA | Brazil | 6904 | Serrinha               | 0.08 | 0.40 | 0.55 | 71105 | 39230 | 24380 |
| BRA | Brazil | 6905 | Serrolandia            | 0.08 | 0.40 | 0.55 | 10455 | 5768  | 3585  |
| BRA | Brazil | 6906 | Simoes Filho           | 0.20 | 0.62 | 0.87 | 81159 | 24928 | 0     |
| BRA | Brazil | 6907 | Sitio Do Mato          | 0.17 | 0.49 | 0.65 | 7705  | 3765  | 1838  |

|     |        |      |                        |      |      |      |        |       |       |
|-----|--------|------|------------------------|------|------|------|--------|-------|-------|
| BRA | Brazil | 6908 | Sitio Do Quinto        | 0.25 | 0.73 | 0.96 | 6601   | 846   | 0     |
| BRA | Brazil | 6909 | Sobradinho             | 0.47 | 0.72 | 0.92 | 7637   | 1818  | 0     |
| BRA | Brazil | 6910 | Souto Soares           | 0.25 | 0.62 | 0.81 | 10165  | 3310  | 0     |
| BRA | Brazil | 6911 | Tabocas Do Brejo Velho | 0.17 | 0.49 | 0.65 | 8303   | 4057  | 1981  |
| BRA | Brazil | 6912 | Tanhacu                | 0.08 | 0.40 | 0.55 | 14750  | 8138  | 5057  |
| BRA | Brazil | 6913 | Tanque Novo            | 0.08 | 0.40 | 0.55 | 13116  | 7236  | 4497  |
| BRA | Brazil | 6914 | Tanquinho              | 0.08 | 0.40 | 0.55 | 5808   | 3204  | 1991  |
| BRA | Brazil | 6915 | Taperoa                | 0.08 | 0.40 | 0.55 | 15205  | 8389  | 5213  |
| BRA | Brazil | 6916 | Tapiramuta             | 0.08 | 0.40 | 0.55 | 12126  | 6690  | 4158  |
| BRA | Brazil | 6917 | Teixeira De Freitas    | 0.08 | 0.40 | 0.55 | 116941 | 64519 | 40095 |
| BRA | Brazil | 6918 | Teodoro Sampaio        | 0.72 | 0.98 | 1.00 | 658    | 0     | 0     |
| BRA | Brazil | 6919 | Teofilandia            | 0.08 | 0.40 | 0.55 | 14356  | 7921  | 4922  |
| BRA | Brazil | 6920 | Teolandia              | 0.08 | 0.40 | 0.55 | 10619  | 5859  | 3641  |
| BRA | Brazil | 6921 | Terra Nova             | 0.08 | 0.40 | 0.55 | 9513   | 5249  | 3262  |
| BRA | Brazil | 6922 | Tremedal               | 0.08 | 0.40 | 0.55 | 13283  | 7329  | 4554  |
| BRA | Brazil | 6923 | Tucano                 | 0.08 | 0.40 | 0.55 | 41049  | 22648 | 14074 |
| BRA | Brazil | 6924 | Uaua                   | 0.08 | 0.40 | 0.55 | 17285  | 9536  | 5926  |
| BRA | Brazil | 6925 | Ubaira                 | 0.08 | 0.40 | 0.55 | 15350  | 8469  | 5263  |
| BRA | Brazil | 6926 | Ubaitaba               | 0.08 | 0.40 | 0.55 | 16501  | 9104  | 5658  |
| BRA | Brazil | 6927 | Ubata                  | 0.08 | 0.40 | 0.55 | 18287  | 10089 | 6270  |
| BRA | Brazil | 6928 | Uibai                  | 0.08 | 0.40 | 0.55 | 10465  | 5774  | 3588  |
| BRA | Brazil | 6929 | Umburanas              | 0.17 | 0.49 | 0.65 | 12274  | 5997  | 2928  |
| BRA | Brazil | 6930 | Una                    | 0.08 | 0.40 | 0.55 | 16464  | 9084  | 5645  |
| BRA | Brazil | 6931 | Urandi                 | 0.08 | 0.40 | 0.55 | 12271  | 6770  | 4207  |
| BRA | Brazil | 6932 | Urucuca                | 0.08 | 0.40 | 0.55 | 14117  | 7789  | 4840  |
| BRA | Brazil | 6933 | Utinga                 | 0.08 | 0.40 | 0.55 | 14648  | 8081  | 5022  |
| BRA | Brazil | 6934 | Valenca                | 0.08 | 0.40 | 0.55 | 70343  | 38810 | 24118 |
| BRA | Brazil | 6935 | Valente                | 0.08 | 0.40 | 0.55 | 20390  | 11250 | 6991  |
| BRA | Brazil | 6936 | Varzea Da Roca         | 0.08 | 0.40 | 0.55 | 10835  | 5978  | 3715  |
| BRA | Brazil | 6937 | Varzea Do Poco         | 0.08 | 0.40 | 0.55 | 5959   | 3288  | 2043  |
| BRA | Brazil | 6938 | Varzea Nova            | 0.08 | 0.40 | 0.55 | 9294   | 5128  | 3187  |
| BRA | Brazil | 6939 | Varzedo                | 0.08 | 0.40 | 0.55 | 6068   | 3348  | 2081  |
| BRA | Brazil | 6940 | Vera Cruz              | 0.41 | 0.65 | 0.84 | 17787  | 6960  | 0     |

|     |        |      |                      |      |      |      |        |        |       |
|-----|--------|------|----------------------|------|------|------|--------|--------|-------|
| BRA | Brazil | 6941 | Vereda               | 0.08 | 0.40 | 0.55 | 4239   | 2339   | 1453  |
| BRA | Brazil | 6942 | Vitoria Da Conquista | 0.08 | 0.40 | 0.55 | 245614 | 135511 | 84213 |
| BRA | Brazil | 6943 | Wagner               | 0.24 | 0.68 | 0.93 | 5205   | 1096   | 0     |
| BRA | Brazil | 6944 | Wanderley            | 0.17 | 0.49 | 0.65 | 7965   | 3892   | 1900  |
| BRA | Brazil | 6945 | Wenceslau Guimaraes  | 0.25 | 0.70 | 0.96 | 12284  | 2281   | 0     |
| BRA | Brazil | 6946 | Xique-xique          | 0.31 | 0.67 | 0.87 | 23356  | 6117   | 0     |
| BRA | Brazil | 6947 | Abaiara              | 0.08 | 0.40 | 0.55 | 8892   | 4906   | 3049  |
| BRA | Brazil | 6948 | Acarape              | 0.08 | 0.40 | 0.55 | 11310  | 6240   | 3878  |
| BRA | Brazil | 6949 | Acarau               | 0.08 | 0.40 | 0.55 | 46348  | 25571  | 15891 |
| BRA | Brazil | 6950 | Acopiara             | 0.08 | 0.40 | 0.55 | 40029  | 22085  | 13725 |
| BRA | Brazil | 6951 | Aiuaba               | 0.08 | 0.40 | 0.55 | 12903  | 7119   | 4424  |
| BRA | Brazil | 6952 | Alcantaras           | 0.08 | 0.40 | 0.55 | 8149   | 4496   | 2794  |
| BRA | Brazil | 6953 | Altaneira            | 0.08 | 0.40 | 0.55 | 5661   | 3123   | 1941  |
| BRA | Brazil | 6954 | Alto Santo           | 0.08 | 0.40 | 0.55 | 16531  | 9121   | 5668  |
| BRA | Brazil | 6955 | Amontada             | 0.08 | 0.40 | 0.55 | 94969  | 52397  | 32562 |
| BRA | Brazil | 6956 | Antonina Do Norte    | 0.08 | 0.40 | 0.55 | 5293   | 2920   | 1815  |
| BRA | Brazil | 6957 | Apuiaries            | 0.08 | 0.40 | 0.55 | 11138  | 6145   | 3819  |
| BRA | Brazil | 6958 | Aquiraz              | 0.08 | 0.40 | 0.55 | 60858  | 33577  | 20866 |
| BRA | Brazil | 6959 | Aracati              | 0.08 | 0.40 | 0.55 | 55285  | 30502  | 18955 |
| BRA | Brazil | 6960 | Aracoiaba            | 0.08 | 0.40 | 0.55 | 19311  | 10654  | 6621  |
| BRA | Brazil | 6961 | Ararenda             | 0.08 | 0.40 | 0.55 | 8149   | 4496   | 2794  |
| BRA | Brazil | 6962 | Araripe              | 0.08 | 0.40 | 0.55 | 15715  | 8670   | 5388  |
| BRA | Brazil | 6963 | Aratuba              | 0.08 | 0.40 | 0.55 | 9574   | 5282   | 3283  |
| BRA | Brazil | 6964 | Arneiroz             | 0.08 | 0.40 | 0.55 | 5537   | 3055   | 1899  |
| BRA | Brazil | 6965 | Assare               | 0.08 | 0.40 | 0.55 | 17680  | 9754   | 6062  |
| BRA | Brazil | 6966 | Aurora               | 0.08 | 0.40 | 0.55 | 18034  | 9950   | 6183  |
| BRA | Brazil | 6967 | Baixio               | 0.08 | 0.40 | 0.55 | 4524   | 2496   | 1551  |
| BRA | Brazil | 6968 | Banabuiu             | 0.08 | 0.40 | 0.55 | 13661  | 7537   | 4684  |
| BRA | Brazil | 6969 | Barbalha             | 0.08 | 0.40 | 0.55 | 43240  | 23857  | 14826 |
| BRA | Brazil | 6970 | Barreira             | 0.08 | 0.40 | 0.55 | 15172  | 8371   | 5202  |
| BRA | Brazil | 6971 | Barro                | 0.08 | 0.40 | 0.55 | 16511  | 9110   | 5661  |
| BRA | Brazil | 6972 | Barroquinha          | 0.08 | 0.40 | 0.55 | 10698  | 5902   | 3668  |
| BRA | Brazil | 6973 | Baturite             | 0.08 | 0.40 | 0.55 | 27414  | 15125  | 9399  |

|     |        |      |                           |      |      |      |         |         |        |
|-----|--------|------|---------------------------|------|------|------|---------|---------|--------|
| BRA | Brazil | 6974 | Beberibe                  | 0.08 | 0.40 | 0.55 | 39452   | 21767   | 13527  |
| BRA | Brazil | 6975 | Bela Cruz                 | 0.08 | 0.40 | 0.55 | 24229   | 13368   | 8307   |
| BRA | Brazil | 6976 | Boa Viagem                | 0.08 | 0.40 | 0.55 | 38973   | 21502   | 13363  |
| BRA | Brazil | 6977 | Brejo Santo               | 0.08 | 0.40 | 0.55 | 38594   | 21293   | 13233  |
| BRA | Brazil | 6978 | Camocim                   | 0.08 | 0.40 | 0.55 | 46511   | 25662   | 15947  |
| BRA | Brazil | 6979 | Campos Sales              | 0.08 | 0.40 | 0.55 | 20238   | 11166   | 6939   |
| BRA | Brazil | 6980 | Caninde                   | 0.08 | 0.40 | 0.55 | 57432   | 31687   | 19692  |
| BRA | Brazil | 6981 | Capistrano                | 0.08 | 0.40 | 0.55 | 12225   | 6745    | 4191   |
| BRA | Brazil | 6982 | Caridade                  | 0.08 | 0.40 | 0.55 | 16674   | 9199    | 5717   |
| BRA | Brazil | 6983 | Carire                    | 0.08 | 0.40 | 0.55 | 12999   | 7172    | 4457   |
| BRA | Brazil | 6984 | Caririacu                 | 0.08 | 0.40 | 0.55 | 20946   | 11557   | 7182   |
| BRA | Brazil | 6985 | Carius                    | 0.08 | 0.40 | 0.55 | 13857   | 7645    | 4751   |
| BRA | Brazil | 6986 | Carnaubal                 | 0.08 | 0.40 | 0.55 | 12672   | 6992    | 4345   |
| BRA | Brazil | 6987 | Cascavel                  | 0.92 | 0.99 | 1.00 | 0       | 0       | 0      |
| BRA | Brazil | 6988 | Catarina                  | 0.08 | 0.40 | 0.55 | 15240   | 8408    | 5225   |
| BRA | Brazil | 6989 | Catunda                   | 0.08 | 0.40 | 0.55 | 7771    | 4287    | 2664   |
| BRA | Brazil | 6990 | Caucaia                   | 0.08 | 0.40 | 0.55 | 280161  | 154572  | 96058  |
| BRA | Brazil | 6991 | Cedro                     | 0.08 | 0.40 | 0.55 | 18068   | 9968    | 6195   |
| BRA | Brazil | 6992 | Chaval                    | 0.08 | 0.40 | 0.55 | 9331    | 5148    | 3199   |
| BRA | Brazil | 6993 | Choro                     | 0.08 | 0.40 | 0.55 | 9512    | 5248    | 3261   |
| BRA | Brazil | 6994 | Chorozinho                | 0.08 | 0.40 | 0.55 | 14876   | 8208    | 5101   |
| BRA | Brazil | 6995 | Coreau                    | 0.08 | 0.40 | 0.55 | 17652   | 9739    | 6052   |
| BRA | Brazil | 6996 | Crateus                   | 0.08 | 0.40 | 0.55 | 55655   | 30706   | 19082  |
| BRA | Brazil | 6997 | Crato                     | 0.08 | 0.40 | 0.55 | 100447  | 55419   | 34440  |
| BRA | Brazil | 6998 | Croata                    | 0.08 | 0.40 | 0.55 | 12762   | 7041    | 4376   |
| BRA | Brazil | 6999 | Cruz                      | 0.08 | 0.40 | 0.55 | 18316   | 10105   | 6280   |
| BRA | Brazil | 7000 | Deputado Irapuan Pinheiro | 0.08 | 0.40 | 0.55 | 7428    | 4098    | 2547   |
| BRA | Brazil | 7001 | Erere                     | 0.08 | 0.40 | 0.55 | 4625    | 2552    | 1586   |
| BRA | Brazil | 7002 | Eusebio                   | 0.08 | 0.40 | 0.55 | 42744   | 23583   | 14655  |
| BRA | Brazil | 7003 | Farias Brito              | 0.08 | 0.40 | 0.55 | 12936   | 7137    | 4435   |
| BRA | Brazil | 7004 | Forquilha                 | 0.08 | 0.40 | 0.55 | 18293   | 10093   | 6272   |
| BRA | Brazil | 7005 | Fortaleza                 | 0.08 | 0.40 | 0.55 | 1927502 | 1063452 | 660877 |
| BRA | Brazil | 7006 | Fortim                    | 0.08 | 0.40 | 0.55 | 12119   | 6686    | 4155   |



|     |        |      |                     |      |      |      |       |       |       |
|-----|--------|------|---------------------|------|------|------|-------|-------|-------|
| BRA | Brazil | 7007 | Frecheirinha        | 0.08 | 0.40 | 0.55 | 9314  | 5139  | 3193  |
| BRA | Brazil | 7008 | General Sampaio     | 0.08 | 0.40 | 0.55 | 5087  | 2806  | 1744  |
| BRA | Brazil | 7009 | Graca               | 0.08 | 0.40 | 0.55 | 10835 | 5978  | 3715  |
| BRA | Brazil | 7010 | Granja              | 0.08 | 0.40 | 0.55 | 43102 | 23780 | 14778 |
| BRA | Brazil | 7011 | Granjeiro           | 0.08 | 0.40 | 0.55 | 2762  | 1524  | 947   |
| BRA | Brazil | 7012 | Groairas            | 0.08 | 0.40 | 0.55 | 8243  | 4548  | 2826  |
| BRA | Brazil | 7013 | Guaiuba             | 0.08 | 0.40 | 0.55 | 20127 | 11105 | 6901  |
| BRA | Brazil | 7014 | Guaraciaba Do Norte | 0.08 | 0.40 | 0.55 | 29318 | 16176 | 10052 |
| BRA | Brazil | 7015 | Guaramiranga        | 0.08 | 0.40 | 0.55 | 4768  | 2631  | 1635  |
| BRA | Brazil | 7016 | Hidrolandia         | 0.48 | 0.75 | 0.90 | 6698  | 1056  | 0     |
| BRA | Brazil | 7017 | Horizonte           | 0.08 | 0.40 | 0.55 | 55006 | 30348 | 18860 |
| BRA | Brazil | 7018 | Ibaretama           | 0.08 | 0.40 | 0.55 | 9405  | 5189  | 3225  |
| BRA | Brazil | 7019 | Ibiapina            | 0.08 | 0.40 | 0.55 | 18816 | 10381 | 6451  |
| BRA | Brazil | 7020 | Ibicuitinga         | 0.08 | 0.40 | 0.55 | 8765  | 4836  | 3005  |
| BRA | Brazil | 7021 | Icapui              | 0.08 | 0.40 | 0.55 | 14735 | 8130  | 5052  |
| BRA | Brazil | 7022 | Ico                 | 0.08 | 0.40 | 0.55 | 52373 | 28896 | 17957 |
| BRA | Brazil | 7023 | Iguatu              | 0.08 | 0.41 | 0.57 | 75946 | 41030 | 24386 |
| BRA | Brazil | 7024 | Independencia       | 0.19 | 0.53 | 0.77 | 16055 | 7006  | 715   |
| BRA | Brazil | 7025 | Ipaporanga          | 0.08 | 0.40 | 0.55 | 8364  | 4615  | 2868  |
| BRA | Brazil | 7026 | Ipauimirim          | 0.08 | 0.40 | 0.55 | 9606  | 5300  | 3294  |
| BRA | Brazil | 7027 | Ipu                 | 0.08 | 0.40 | 0.55 | 29748 | 16413 | 10200 |
| BRA | Brazil | 7028 | Ipueiras            | 0.09 | 0.43 | 0.59 | 27596 | 14456 | 8045  |
| BRA | Brazil | 7029 | Iracema             | 0.20 | 0.68 | 0.94 | 8793  | 1773  | 0     |
| BRA | Brazil | 7030 | Iraucuba            | 0.08 | 0.40 | 0.55 | 15247 | 8412  | 5228  |
| BRA | Brazil | 7031 | Itaicaba            | 0.08 | 0.40 | 0.55 | 5633  | 3108  | 1931  |
| BRA | Brazil | 7032 | Itaitinga           | 0.08 | 0.40 | 0.55 | 31377 | 17311 | 10758 |
| BRA | Brazil | 7033 | Itapage             | 0.08 | 0.40 | 0.55 | 37462 | 20669 | 12844 |
| BRA | Brazil | 7034 | Itapipoca           | 0.08 | 0.40 | 0.55 | 32451 | 17904 | 11126 |
| BRA | Brazil | 7035 | Itapiuna            | 0.08 | 0.40 | 0.55 | 14837 | 8186  | 5087  |
| BRA | Brazil | 7036 | Itarema             | 0.08 | 0.40 | 0.55 | 31140 | 17181 | 10677 |
| BRA | Brazil | 7037 | Itatira             | 0.08 | 0.40 | 0.55 | 15116 | 8340  | 5183  |
| BRA | Brazil | 7038 | Jaguaretama         | 0.08 | 0.40 | 0.55 | 14177 | 7822  | 4861  |
| BRA | Brazil | 7039 | Jaguaribara         | 0.08 | 0.40 | 0.55 | 2185  | 1206  | 749   |

|     |        |      |                        |      |      |      |        |        |       |
|-----|--------|------|------------------------|------|------|------|--------|--------|-------|
| BRA | Brazil | 7040 | Jaguaribe              | 0.08 | 0.40 | 0.55 | 25142  | 13872  | 8620  |
| BRA | Brazil | 7041 | Jaguaruana             | 0.08 | 0.40 | 0.55 | 23967  | 13223  | 8217  |
| BRA | Brazil | 7042 | Jardim                 | 0.62 | 0.84 | 0.96 | 4534   | 0      | 0     |
| BRA | Brazil | 7043 | Jati                   | 0.08 | 0.40 | 0.55 | 4994   | 2755   | 1712  |
| BRA | Brazil | 7044 | Jijoca De Jericoacoara | 0.08 | 0.40 | 0.55 | 13888  | 7662   | 4762  |
| BRA | Brazil | 7045 | Juazeiro Do Norte      | 0.08 | 0.40 | 0.55 | 200029 | 110361 | 68583 |
| BRA | Brazil | 7046 | Jucas                  | 0.08 | 0.40 | 0.55 | 18309  | 10101  | 6278  |
| BRA | Brazil | 7047 | Lavras Da Mangabeira   | 0.08 | 0.40 | 0.55 | 23519  | 12976  | 8064  |
| BRA | Brazil | 7048 | Limoeiro Do Norte      | 0.08 | 0.40 | 0.55 | 48680  | 26858  | 16691 |
| BRA | Brazil | 7049 | Madalena               | 0.08 | 0.40 | 0.55 | 15174  | 8372   | 5203  |
| BRA | Brazil | 7050 | Maracanau              | 0.08 | 0.40 | 0.55 | 159281 | 87879  | 54612 |
| BRA | Brazil | 7051 | Maranguape             | 0.08 | 0.40 | 0.55 | 96849  | 53434  | 33206 |
| BRA | Brazil | 7052 | Marco                  | 0.08 | 0.40 | 0.55 | 19913  | 10987  | 6828  |
| BRA | Brazil | 7053 | Martinopole            | 0.08 | 0.40 | 0.55 | 7967   | 4396   | 2732  |
| BRA | Brazil | 7054 | Massape                | 0.08 | 0.40 | 0.55 | 27928  | 15409  | 9576  |
| BRA | Brazil | 7055 | Mauriti                | 0.08 | 0.40 | 0.55 | 33173  | 18302  | 11374 |
| BRA | Brazil | 7056 | Meruoca                | 0.08 | 0.40 | 0.55 | 10918  | 6024   | 3743  |
| BRA | Brazil | 7057 | Milagres               | 0.08 | 0.40 | 0.55 | 21886  | 12075  | 7504  |
| BRA | Brazil | 7058 | Milha                  | 0.08 | 0.40 | 0.55 | 9838   | 5428   | 3373  |
| BRA | Brazil | 7059 | Miraima                | 0.08 | 0.40 | 0.55 | 11674  | 6441   | 4003  |
| BRA | Brazil | 7060 | Missao Velha           | 0.08 | 0.40 | 0.55 | 24435  | 13481  | 8378  |
| BRA | Brazil | 7061 | Mombaca                | 0.08 | 0.40 | 0.55 | 32433  | 17894  | 11120 |
| BRA | Brazil | 7062 | Monsenhor Tabosa       | 0.08 | 0.40 | 0.55 | 12275  | 6772   | 4209  |
| BRA | Brazil | 7063 | Morada Nova            | 0.08 | 0.40 | 0.55 | 46772  | 25805  | 16036 |
| BRA | Brazil | 7064 | Moraujo                | 0.08 | 0.40 | 0.55 | 6838   | 3773   | 2344  |
| BRA | Brazil | 7065 | Morrinhos              | 0.90 | 0.92 | 0.94 | 0      | 0      | 0     |
| BRA | Brazil | 7066 | Mucambo                | 0.08 | 0.40 | 0.55 | 11859  | 6543   | 4066  |
| BRA | Brazil | 7067 | Mulungu                | 0.08 | 0.40 | 0.55 | 6423   | 3544   | 2202  |
| BRA | Brazil | 7068 | Nova Olinda            | 0.26 | 0.64 | 0.90 | 8693   | 2509   | 0     |
| BRA | Brazil | 7069 | Nova Russas            | 0.08 | 0.40 | 0.55 | 23823  | 13144  | 8168  |
| BRA | Brazil | 7070 | Novo Oriente           | 0.08 | 0.40 | 0.55 | 20938  | 11552  | 7179  |
| BRA | Brazil | 7071 | Ocara                  | 0.08 | 0.40 | 0.55 | 18962  | 10462  | 6502  |
| BRA | Brazil | 7072 | Oros                   | 0.08 | 0.40 | 0.55 | 15733  | 8680   | 5394  |

|     |        |      |                   |      |      |      |       |       |       |
|-----|--------|------|-------------------|------|------|------|-------|-------|-------|
| BRA | Brazil | 7073 | Pacajus           | 0.08 | 0.40 | 0.55 | 52561 | 28999 | 18021 |
| BRA | Brazil | 7074 | Pacatuba          | 0.08 | 0.40 | 0.55 | 65414 | 36091 | 22428 |
| BRA | Brazil | 7075 | Pacoti            | 0.08 | 0.40 | 0.55 | 8124  | 4482  | 2785  |
| BRA | Brazil | 7076 | Pacuja            | 0.08 | 0.40 | 0.55 | 4404  | 2430  | 1510  |
| BRA | Brazil | 7077 | Palhano           | 0.08 | 0.40 | 0.55 | 6740  | 3718  | 2311  |
| BRA | Brazil | 7078 | Palmacia          | 0.08 | 0.40 | 0.55 | 11178 | 6167  | 3833  |
| BRA | Brazil | 7079 | Paracuru          | 0.08 | 0.40 | 0.55 | 24518 | 13527 | 8407  |
| BRA | Brazil | 7080 | Paraipaba         | 0.08 | 0.40 | 0.55 | 24781 | 13672 | 8497  |
| BRA | Brazil | 7081 | Parambu           | 0.08 | 0.40 | 0.55 | 23589 | 13015 | 8088  |
| BRA | Brazil | 7082 | Paramoti          | 0.08 | 0.40 | 0.55 | 8782  | 4845  | 3011  |
| BRA | Brazil | 7083 | Pedra Branca      | 0.08 | 0.40 | 0.55 | 31391 | 17319 | 10763 |
| BRA | Brazil | 7084 | Penaforte         | 0.08 | 0.40 | 0.55 | 7378  | 4070  | 2530  |
| BRA | Brazil | 7085 | Pentecoste        | 0.08 | 0.40 | 0.55 | 28244 | 15583 | 9684  |
| BRA | Brazil | 7086 | Pereiro           | 0.08 | 0.40 | 0.55 | 10496 | 5791  | 3599  |
| BRA | Brazil | 7087 | Pindoretama       | 0.08 | 0.40 | 0.55 | 15025 | 8290  | 5152  |
| BRA | Brazil | 7088 | Piquet Carneiro   | 0.08 | 0.40 | 0.55 | 12218 | 6741  | 4189  |
| BRA | Brazil | 7089 | Pires Ferreira    | 0.08 | 0.40 | 0.55 | 8517  | 4699  | 2920  |
| BRA | Brazil | 7090 | Poranga           | 0.08 | 0.40 | 0.55 | 7745  | 4273  | 2655  |
| BRA | Brazil | 7091 | Porteiras         | 0.08 | 0.40 | 0.55 | 9826  | 5421  | 3369  |
| BRA | Brazil | 7092 | Potengi           | 0.08 | 0.40 | 0.55 | 7992  | 4409  | 2740  |
| BRA | Brazil | 7093 | Potiretama        | 0.08 | 0.40 | 0.55 | 5023  | 2771  | 1722  |
| BRA | Brazil | 7094 | Quiterianopolis   | 0.08 | 0.40 | 0.55 | 15407 | 8501  | 5283  |
| BRA | Brazil | 7095 | Quixada           | 0.08 | 0.40 | 0.55 | 65051 | 35890 | 22304 |
| BRA | Brazil | 7096 | Quixelo           | 0.08 | 0.40 | 0.55 | 10928 | 6029  | 3747  |
| BRA | Brazil | 7097 | Quixeramobim      | 0.08 | 0.40 | 0.55 | 59419 | 32783 | 20373 |
| BRA | Brazil | 7098 | Quixere           | 0.08 | 0.40 | 0.55 | 15548 | 8578  | 5331  |
| BRA | Brazil | 7099 | Redencao          | 0.69 | 0.88 | 0.98 | 3279  | 0     | 0     |
| BRA | Brazil | 7100 | Reriutaba         | 0.08 | 0.40 | 0.55 | 13678 | 7547  | 4690  |
| BRA | Brazil | 7101 | Russas            | 0.08 | 0.40 | 0.55 | 54719 | 30190 | 18761 |
| BRA | Brazil | 7102 | Saboeiro          | 0.08 | 0.40 | 0.55 | 11656 | 6431  | 3996  |
| BRA | Brazil | 7103 | Salitre           | 0.08 | 0.40 | 0.55 | 12016 | 6630  | 4120  |
| BRA | Brazil | 7104 | Santa Quiteria    | 0.08 | 0.40 | 0.55 | 32348 | 17847 | 11091 |
| BRA | Brazil | 7105 | Santana Do Acarau | 0.08 | 0.40 | 0.55 | 24949 | 13765 | 8554  |

|     |        |      |                         |      |      |      |        |       |       |
|-----|--------|------|-------------------------|------|------|------|--------|-------|-------|
| BRA | Brazil | 7106 | Santana Do Cariri       | 0.08 | 0.40 | 0.55 | 12524  | 6910  | 4294  |
| BRA | Brazil | 7107 | Sao Benedito            | 0.08 | 0.40 | 0.55 | 34806  | 19203 | 11934 |
| BRA | Brazil | 7108 | Sao Goncalo Do Amarante | 0.08 | 0.40 | 0.55 | 36142  | 19940 | 12392 |
| BRA | Brazil | 7109 | Sao Joao Do Jaguaribe   | 0.08 | 0.40 | 0.55 | 5661   | 3123  | 1941  |
| BRA | Brazil | 7110 | Sao Luis Do Curu        | 0.08 | 0.40 | 0.55 | 9503   | 5243  | 3258  |
| BRA | Brazil | 7111 | Senador Pompeu          | 0.08 | 0.40 | 0.55 | 20060  | 11068 | 6878  |
| BRA | Brazil | 7112 | Senador Sa              | 0.08 | 0.40 | 0.55 | 5851   | 3228  | 2006  |
| BRA | Brazil | 7113 | Sobral                  | 0.08 | 0.40 | 0.55 | 153713 | 84808 | 52703 |
| BRA | Brazil | 7114 | Solonopole              | 0.08 | 0.40 | 0.55 | 12961  | 7151  | 4444  |
| BRA | Brazil | 7115 | Tabuleiro Do Norte      | 0.08 | 0.40 | 0.55 | 22553  | 12443 | 7733  |
| BRA | Brazil | 7116 | Tamboril                | 0.08 | 0.40 | 0.55 | 19231  | 10610 | 6594  |
| BRA | Brazil | 7117 | Tarrafas                | 0.08 | 0.40 | 0.55 | 6617   | 3651  | 2269  |
| BRA | Brazil | 7118 | Taua                    | 0.08 | 0.40 | 0.55 | 42385  | 23385 | 14532 |
| BRA | Brazil | 7119 | Tejucuoca               | 0.08 | 0.40 | 0.55 | 14612  | 8062  | 5010  |
| BRA | Brazil | 7120 | Tiangua                 | 0.08 | 0.40 | 0.55 | 52422  | 28922 | 17974 |
| BRA | Brazil | 7121 | Trairi                  | 0.08 | 0.40 | 0.55 | 40723  | 22468 | 13963 |
| BRA | Brazil | 7122 | Tururu                  | 0.08 | 0.40 | 0.55 | 11095  | 6122  | 3804  |
| BRA | Brazil | 7123 | Ubajara                 | 0.08 | 0.40 | 0.55 | 24874  | 13724 | 8529  |
| BRA | Brazil | 7124 | Umari                   | 0.08 | 0.40 | 0.55 | 5692   | 3140  | 1952  |
| BRA | Brazil | 7125 | Umirim                  | 0.08 | 0.40 | 0.55 | 15494  | 8548  | 5312  |
| BRA | Brazil | 7126 | Uruburetama             | 0.08 | 0.40 | 0.55 | 17974  | 9917  | 6163  |
| BRA | Brazil | 7127 | Uruoca                  | 0.08 | 0.40 | 0.55 | 10360  | 5716  | 3552  |
| BRA | Brazil | 7128 | Varjota                 | 0.08 | 0.40 | 0.55 | 14211  | 7840  | 4872  |
| BRA | Brazil | 7129 | Varzea Alegre           | 0.08 | 0.40 | 0.55 | 29671  | 16370 | 10173 |
| BRA | Brazil | 7130 | Vicosa Do Ceara         | 0.08 | 0.40 | 0.55 | 48535  | 26778 | 16641 |
| BRA | Brazil | 7131 | Brasilia                | 0.67 | 0.92 | 0.99 | 396666 | 0     | 0     |
| BRA | Brazil | 7132 | Afonso Claudio          | 0.17 | 0.49 | 0.65 | 19918  | 9733  | 4752  |
| BRA | Brazil | 7133 | Agua Doce Do Norte      | 0.17 | 0.49 | 0.65 | 7384   | 3608  | 1762  |
| BRA | Brazil | 7134 | Agua Branca             | 0.08 | 0.40 | 0.55 | 7022   | 3874  | 2408  |
| BRA | Brazil | 7135 | Alegre                  | 0.08 | 0.40 | 0.55 | 22661  | 12503 | 7770  |
| BRA | Brazil | 7136 | Alfredo Chaves          | 0.08 | 0.40 | 0.55 | 10646  | 5874  | 3650  |
| BRA | Brazil | 7137 | Alto Rio Novo           | 0.17 | 0.49 | 0.65 | 4866   | 2378  | 1161  |
| BRA | Brazil | 7138 | Anchieta                | 0.08 | 0.40 | 0.55 | 20326  | 11215 | 6969  |

|     |        |      |                         |      |      |      |        |        |       |
|-----|--------|------|-------------------------|------|------|------|--------|--------|-------|
| BRA | Brazil | 7139 | Apiaca                  | 0.08 | 0.40 | 0.55 | 5563   | 3069   | 1907  |
| BRA | Brazil | 7140 | Aracruz                 | 0.08 | 0.40 | 0.55 | 68511  | 37799  | 23490 |
| BRA | Brazil | 7141 | Atilio Vivacqua         | 0.08 | 0.40 | 0.55 | 8020   | 4425   | 2750  |
| BRA | Brazil | 7142 | Baixo Guandu            | 0.17 | 0.49 | 0.65 | 19336  | 9448   | 4613  |
| BRA | Brazil | 7143 | Barra De Sao Francisco  | 0.08 | 0.40 | 0.55 | 30953  | 17077  | 10613 |
| BRA | Brazil | 7144 | Boa Esperanca           | 0.55 | 0.90 | 0.98 | 3691   | 0      | 0     |
| BRA | Brazil | 7145 | Bom Jesus Do Norte      | 0.08 | 0.40 | 0.55 | 7741   | 4271   | 2654  |
| BRA | Brazil | 7146 | Brejetuba               | 0.17 | 0.49 | 0.65 | 7701   | 3763   | 1837  |
| BRA | Brazil | 7147 | Cachoeiro De Itapemirim | 0.08 | 0.40 | 0.55 | 147800 | 81545  | 50676 |
| BRA | Brazil | 7148 | Cariacica               | 0.08 | 0.40 | 0.55 | 275218 | 151845 | 94363 |
| BRA | Brazil | 7149 | Castelo                 | 0.08 | 0.40 | 0.55 | 26799  | 14786  | 9189  |
| BRA | Brazil | 7150 | Colatina                | 0.08 | 0.40 | 0.55 | 95441  | 52657  | 32724 |
| BRA | Brazil | 7151 | Conceicao Da Barra      | 0.08 | 0.40 | 0.55 | 22384  | 12350  | 7675  |
| BRA | Brazil | 7152 | Conceicao Do Castelo    | 0.08 | 0.40 | 0.55 | 9096   | 5019   | 3119  |
| BRA | Brazil | 7153 | Divino De Sao Lourenco  | 0.17 | 0.49 | 0.65 | 2898   | 1416   | 691   |
| BRA | Brazil | 7154 | Domingos Martins        | 0.08 | 0.40 | 0.55 | 24361  | 13441  | 8353  |
| BRA | Brazil | 7155 | Dores Do Rio Preto      | 0.17 | 0.49 | 0.65 | 3802   | 1858   | 907   |
| BRA | Brazil | 7156 | Ecoporanga              | 0.17 | 0.49 | 0.65 | 15067  | 7362   | 3595  |
| BRA | Brazil | 7157 | Fundao                  | 0.08 | 0.40 | 0.55 | 14529  | 8016   | 4982  |
| BRA | Brazil | 7158 | Guacui                  | 0.17 | 0.49 | 0.65 | 18939  | 9254   | 4518  |
| BRA | Brazil | 7159 | Guarapari               | 0.08 | 0.40 | 0.55 | 83633  | 46142  | 28675 |
| BRA | Brazil | 7160 | Ibatiba                 | 0.17 | 0.49 | 0.65 | 15377  | 7514   | 3669  |
| BRA | Brazil | 7161 | Ibiracu                 | 0.08 | 0.40 | 0.55 | 8753   | 4829   | 3001  |
| BRA | Brazil | 7162 | Ibitirama               | 0.17 | 0.49 | 0.65 | 5652   | 2762   | 1348  |
| BRA | Brazil | 7163 | Iconha                  | 0.08 | 0.40 | 0.55 | 9685   | 5343   | 3321  |
| BRA | Brazil | 7164 | Irupi                   | 0.17 | 0.49 | 0.65 | 8530   | 4168   | 2035  |
| BRA | Brazil | 7165 | Itaguacu                | 0.08 | 0.40 | 0.55 | 10416  | 5747   | 3571  |
| BRA | Brazil | 7167 | Itarana                 | 0.08 | 0.40 | 0.55 | 7928   | 4374   | 2718  |
| BRA | Brazil | 7168 | Iuna                    | 0.17 | 0.49 | 0.65 | 17558  | 8579   | 4189  |
| BRA | Brazil | 7169 | Jaguare                 | 0.08 | 0.40 | 0.55 | 20929  | 11547  | 7176  |
| BRA | Brazil | 7170 | Jeronimo Monteiro       | 0.08 | 0.40 | 0.55 | 8348   | 4606   | 2862  |
| BRA | Brazil | 7171 | Joao Neiva              | 0.08 | 0.40 | 0.55 | 11829  | 6526   | 4056  |
| BRA | Brazil | 7172 | Laranja Da Terra        | 0.17 | 0.49 | 0.65 | 6890   | 3366   | 1644  |

|     |        |      |                         |      |      |      |        |        |        |
|-----|--------|------|-------------------------|------|------|------|--------|--------|--------|
| BRA | Brazil | 7173 | Linhares                | 0.08 | 0.40 | 0.55 | 117917 | 65058  | 40430  |
| BRA | Brazil | 7174 | Mantenopolis            | 0.17 | 0.49 | 0.65 | 9317   | 4553   | 2223   |
| BRA | Brazil | 7175 | Marataizes              | 0.08 | 0.40 | 0.55 | 26293  | 14506  | 9015   |
| BRA | Brazil | 7176 | Marechal Floriano       | 0.08 | 0.40 | 0.55 | 11316  | 6243   | 3880   |
| BRA | Brazil | 7177 | Marilandia              | 0.08 | 0.40 | 0.55 | 8631   | 4762   | 2959   |
| BRA | Brazil | 7178 | Mimoso Do Sul           | 0.08 | 0.40 | 0.55 | 19293  | 10645  | 6615   |
| BRA | Brazil | 7179 | Montanha                | 0.17 | 0.49 | 0.65 | 11872  | 5801   | 2832   |
| BRA | Brazil | 7180 | Mucurici                | 0.17 | 0.49 | 0.65 | 3710   | 1813   | 885    |
| BRA | Brazil | 7181 | Muniz Freire            | 0.17 | 0.49 | 0.65 | 11681  | 5708   | 2787   |
| BRA | Brazil | 7182 | Muqui                   | 0.08 | 0.40 | 0.55 | 10802  | 5960   | 3704   |
| BRA | Brazil | 7183 | Nova Venecia            | 0.08 | 0.40 | 0.55 | 35274  | 19461  | 12094  |
| BRA | Brazil | 7184 | Pancas                  | 0.08 | 0.40 | 0.55 | 16392  | 9044   | 5620   |
| BRA | Brazil | 7185 | Pedro Canario           | 0.08 | 0.40 | 0.55 | 17628  | 9726   | 6044   |
| BRA | Brazil | 7186 | Pinheiros               | 0.08 | 0.40 | 0.55 | 19203  | 10595  | 6584   |
| BRA | Brazil | 7187 | Piuma                   | 0.08 | 0.40 | 0.55 | 14646  | 8081   | 5022   |
| BRA | Brazil | 7188 | Ponto Belo              | 0.08 | 0.40 | 0.55 | 5528   | 3050   | 1895   |
| BRA | Brazil | 7189 | Presidente Kennedy      | 0.15 | 0.56 | 0.82 | 7466   | 2768   | 0      |
| BRA | Brazil | 7190 | Rio Bananal             | 0.08 | 0.40 | 0.55 | 13958  | 7701   | 4786   |
| BRA | Brazil | 7191 | Rio Novo Do Sul         | 0.08 | 0.40 | 0.55 | 8473   | 4675   | 2905   |
| BRA | Brazil | 7192 | Santa Leopoldina        | 0.08 | 0.40 | 0.55 | 9007   | 4969   | 3088   |
| BRA | Brazil | 7193 | Santa Maria De Jetiba   | 0.08 | 0.40 | 0.55 | 27548  | 15199  | 9445   |
| BRA | Brazil | 7194 | Santa Teresa            | 0.08 | 0.40 | 0.55 | 16994  | 9376   | 5827   |
| BRA | Brazil | 7195 | Sao Domingos Do Norte   | 0.08 | 0.40 | 0.55 | 6334   | 3495   | 2172   |
| BRA | Brazil | 7196 | Sao Gabriel Da Palha    | 0.08 | 0.40 | 0.55 | 25734  | 14198  | 8823   |
| BRA | Brazil | 7197 | Sao Jose Do Calcado     | 0.08 | 0.40 | 0.55 | 8006   | 4417   | 2745   |
| BRA | Brazil | 7198 | Sao Mateus              | 0.08 | 0.40 | 0.55 | 88275  | 48704  | 30267  |
| BRA | Brazil | 7199 | Sao Roque Do Canaa      | 0.08 | 0.40 | 0.55 | 8680   | 4789   | 2976   |
| BRA | Brazil | 7200 | Serra                   | 0.08 | 0.40 | 0.55 | 339824 | 187489 | 116514 |
| BRA | Brazil | 7201 | Sooretama               | 0.08 | 0.40 | 0.55 | 20099  | 11089  | 6891   |
| BRA | Brazil | 7202 | Vargem Alta             | 0.08 | 0.40 | 0.55 | 14643  | 8079   | 5021   |
| BRA | Brazil | 7203 | Venda Nova Do Imigrante | 0.08 | 0.40 | 0.55 | 16904  | 9326   | 5796   |
| BRA | Brazil | 7204 | Viana                   | 0.25 | 0.67 | 0.93 | 39650  | 9479   | 0      |
| BRA | Brazil | 7205 | Vila Pavao              | 0.08 | 0.40 | 0.55 | 6611   | 3648   | 2267   |

|     |        |      |                       |      |      |      |        |        |        |
|-----|--------|------|-----------------------|------|------|------|--------|--------|--------|
| BRA | Brazil | 7206 | Vila Valerio          | 0.08 | 0.40 | 0.55 | 10232  | 5645   | 3508   |
| BRA | Brazil | 7207 | Vila Velha            | 0.08 | 0.40 | 0.55 | 329720 | 181915 | 113050 |
| BRA | Brazil | 7208 | Vitoria               | 0.08 | 0.40 | 0.55 | 242277 | 133670 | 83069  |
| BRA | Brazil | 7209 | Abadia De Goias       | 0.71 | 0.93 | 0.98 | 727    | 0      | 0      |
| BRA | Brazil | 7210 | Abadiania             | 0.53 | 0.85 | 0.95 | 5251   | 0      | 0      |
| BRA | Brazil | 7211 | Acreuna               | 0.60 | 0.91 | 0.98 | 4353   | 0      | 0      |
| BRA | Brazil | 7212 | Adelandia             | 0.33 | 0.84 | 0.97 | 1165   | 0      | 0      |
| BRA | Brazil | 7213 | Agua Fria De Goias    | 0.69 | 0.91 | 0.96 | 639    | 0      | 0      |
| BRA | Brazil | 7214 | Agua Limpa            | 0.88 | 0.94 | 0.96 | 0      | 0      | 0      |
| BRA | Brazil | 7215 | Aguas Lindas De Goias | 0.51 | 0.89 | 0.99 | 59165  | 0      | 0      |
| BRA | Brazil | 7216 | Alexania              | 0.79 | 0.95 | 1.00 | 139    | 0      | 0      |
| BRA | Brazil | 7217 | Aloandia              | 0.79 | 0.93 | 0.96 | 21     | 0      | 0      |
| BRA | Brazil | 7218 | Alto Horizonte        | 0.32 | 0.84 | 0.96 | 2927   | 0      | 0      |
| BRA | Brazil | 7219 | Alto Paraiso De Goias | 0.63 | 0.97 | 0.99 | 1309   | 0      | 0      |
| BRA | Brazil | 7220 | Alvorada Do Norte     | 0.77 | 0.95 | 0.99 | 278    | 0      | 0      |
| BRA | Brazil | 7221 | Amaralina             | 0.30 | 0.78 | 0.91 | 1939   | 61     | 0      |
| BRA | Brazil | 7222 | Americano Do Brasil   | 0.78 | 0.93 | 0.97 | 106    | 0      | 0      |
| BRA | Brazil | 7223 | Amorinopolis          | 0.43 | 0.87 | 0.96 | 1269   | 0      | 0      |
| BRA | Brazil | 7224 | Anapolis              | 0.70 | 0.92 | 0.99 | 36947  | 0      | 0      |
| BRA | Brazil | 7225 | Anhanguera            | 0.95 | 0.97 | 0.98 | 0      | 0      | 0      |
| BRA | Brazil | 7226 | Anicuns               | 0.45 | 0.86 | 0.96 | 7682   | 0      | 0      |
| BRA | Brazil | 7227 | Aparecida De Goiania  | 0.64 | 0.94 | 1.00 | 87245  | 0      | 0      |
| BRA | Brazil | 7228 | Aparecida Do Rio Doce | 0.92 | 0.98 | 1.00 | 0      | 0      | 0      |
| BRA | Brazil | 7229 | Apore                 | 0.61 | 0.93 | 0.99 | 909    | 0      | 0      |
| BRA | Brazil | 7230 | Aracu                 | 0.60 | 0.93 | 0.99 | 779    | 0      | 0      |
| BRA | Brazil | 7231 | Aragarcas             | 0.65 | 0.90 | 0.98 | 3000   | 0      | 0      |
| BRA | Brazil | 7232 | Aragoiania            | 0.50 | 0.87 | 0.95 | 2929   | 0      | 0      |
| BRA | Brazil | 7233 | Araguapaz             | 0.83 | 0.94 | 0.97 | 0      | 0      | 0      |
| BRA | Brazil | 7234 | Arenopolis            | 0.62 | 0.92 | 0.98 | 539    | 0      | 0      |
| BRA | Brazil | 7235 | Aruana                | 0.34 | 0.86 | 0.98 | 4208   | 0      | 0      |
| BRA | Brazil | 7236 | Aurilandia            | 0.59 | 0.90 | 0.97 | 705    | 0      | 0      |
| BRA | Brazil | 7237 | Avelinopolis          | 0.83 | 0.94 | 0.99 | 0      | 0      | 0      |
| BRA | Brazil | 7238 | Baliza                | 0.29 | 0.76 | 0.89 | 2478   | 205    | 0      |

|     |        |      |                       |      |      |      |       |      |     |
|-----|--------|------|-----------------------|------|------|------|-------|------|-----|
| BRA | Brazil | 7239 | Barro Alto            | 0.21 | 0.66 | 0.75 | 6420  | 1568 | 507 |
| BRA | Brazil | 7240 | Bela Vista De Goias   | 0.52 | 0.89 | 0.98 | 8162  | 0    | 0   |
| BRA | Brazil | 7241 | Bom Jardim De Goias   | 0.62 | 0.88 | 0.97 | 1544  | 0    | 0   |
| BRA | Brazil | 7242 | Bom Jesus De Goias    | 0.68 | 0.93 | 0.99 | 2524  | 0    | 0   |
| BRA | Brazil | 7243 | Bonfinopolis          | 0.55 | 0.88 | 0.98 | 2276  | 0    | 0   |
| BRA | Brazil | 7244 | Bonopolis             | 0.48 | 0.90 | 0.98 | 1333  | 0    | 0   |
| BRA | Brazil | 7245 | Brazabrantes          | 0.36 | 0.84 | 0.96 | 1503  | 0    | 0   |
| BRA | Brazil | 7246 | Britania              | 0.47 | 0.91 | 0.99 | 1958  | 0    | 0   |
| BRA | Brazil | 7247 | Buriti Alegre         | 0.54 | 0.88 | 0.99 | 2505  | 0    | 0   |
| BRA | Brazil | 7248 | Buriti De Goias       | 0.56 | 0.91 | 0.98 | 620   | 0    | 0   |
| BRA | Brazil | 7249 | Buritinopolis         | 0.49 | 0.90 | 0.98 | 1100  | 0    | 0   |
| BRA | Brazil | 7250 | Cabeceiras            | 0.52 | 0.90 | 0.99 | 2188  | 0    | 0   |
| BRA | Brazil | 7251 | Cachoeira Alta        | 0.47 | 0.89 | 0.96 | 4162  | 0    | 0   |
| BRA | Brazil | 7252 | Cachoeira De Goias    | 0.40 | 0.88 | 0.97 | 575   | 0    | 0   |
| BRA | Brazil | 7253 | Cachoeira Dourada     | 0.80 | 0.96 | 0.99 | 16    | 0    | 0   |
| BRA | Brazil | 7254 | Cacu                  | 0.50 | 0.88 | 0.95 | 4563  | 0    | 0   |
| BRA | Brazil | 7255 | Caiaponia             | 0.55 | 0.88 | 0.96 | 4603  | 0    | 0   |
| BRA | Brazil | 7256 | Caldas Novas          | 0.66 | 0.91 | 0.98 | 12052 | 0    | 0   |
| BRA | Brazil | 7257 | Caldazinha            | 0.45 | 0.86 | 0.97 | 1392  | 0    | 0   |
| BRA | Brazil | 7258 | Campestre De Goias    | 0.56 | 0.91 | 0.98 | 869   | 0    | 0   |
| BRA | Brazil | 7259 | Campinacu             | 0.31 | 0.79 | 0.92 | 1839  | 42   | 0   |
| BRA | Brazil | 7260 | Campinorte            | 0.48 | 0.86 | 0.97 | 4553  | 0    | 0   |
| BRA | Brazil | 7261 | Campo Alegre De Goias | 0.59 | 0.88 | 0.96 | 1555  | 0    | 0   |
| BRA | Brazil | 7262 | Campos Belos          | 0.75 | 0.95 | 1.00 | 990   | 0    | 0   |
| BRA | Brazil | 7263 | Campos Verdes         | 0.78 | 0.97 | 1.00 | 74    | 0    | 0   |
| BRA | Brazil | 7264 | Carmo Do Rio Verde    | 0.46 | 0.89 | 0.97 | 3485  | 0    | 0   |
| BRA | Brazil | 7265 | Castelândia           | 0.77 | 0.93 | 0.98 | 123   | 0    | 0   |
| BRA | Brazil | 7266 | Catalao               | 0.63 | 0.92 | 0.99 | 17832 | 0    | 0   |
| BRA | Brazil | 7267 | Caturai               | 0.56 | 0.90 | 0.99 | 1156  | 0    | 0   |
| BRA | Brazil | 7268 | Cavalcante            | 0.64 | 0.93 | 1.00 | 1535  | 0    | 0   |
| BRA | Brazil | 7269 | Ceres                 | 0.62 | 0.88 | 0.95 | 4735  | 0    | 0   |
| BRA | Brazil | 7270 | Cezarina              | 0.74 | 0.93 | 0.98 | 507   | 0    | 0   |
| BRA | Brazil | 7271 | Chapadao Do Ceu       | 0.50 | 0.90 | 0.98 | 2961  | 0    | 0   |



|     |        |      |                      |      |      |      |        |   |   |
|-----|--------|------|----------------------|------|------|------|--------|---|---|
| BRA | Brazil | 7272 | Cidade Ocidental     | 0.58 | 0.91 | 1.00 | 14562  | 0 | 0 |
| BRA | Brazil | 7273 | Cocalzinho De Goias  | 0.57 | 0.91 | 0.99 | 4597   | 0 | 0 |
| BRA | Brazil | 7274 | Colinas Do Sul       | 0.71 | 0.95 | 1.00 | 324    | 0 | 0 |
| BRA | Brazil | 7275 | Corrego Do Ouro      | 0.42 | 0.88 | 0.97 | 955    | 0 | 0 |
| BRA | Brazil | 7276 | Corumba De Goias     | 0.54 | 0.85 | 0.95 | 2909   | 0 | 0 |
| BRA | Brazil | 7277 | Corumbaiba           | 0.77 | 0.91 | 0.95 | 242    | 0 | 0 |
| BRA | Brazil | 7278 | Cristalina           | 0.55 | 0.91 | 0.99 | 13847  | 0 | 0 |
| BRA | Brazil | 7279 | Cristianopolis       | 0.70 | 0.92 | 0.97 | 294    | 0 | 0 |
| BRA | Brazil | 7280 | Crixas               | 0.62 | 0.91 | 0.98 | 3143   | 0 | 0 |
| BRA | Brazil | 7281 | Crominia             | 0.82 | 0.93 | 0.96 | 0      | 0 | 0 |
| BRA | Brazil | 7282 | Cumari               | 0.58 | 0.87 | 0.94 | 722    | 0 | 0 |
| BRA | Brazil | 7283 | Damianopolis         | 0.54 | 0.92 | 0.99 | 894    | 0 | 0 |
| BRA | Brazil | 7284 | Damolândia           | 0.79 | 0.92 | 0.97 | 19     | 0 | 0 |
| BRA | Brazil | 7285 | Davinopolis          | 1.00 | 1.00 | 1.00 | 0      | 0 | 0 |
| BRA | Brazil | 7286 | Diorama              | 0.66 | 0.91 | 0.96 | 357    | 0 | 0 |
| BRA | Brazil | 7287 | Divinopolis De Goias | 0.61 | 0.95 | 1.00 | 952    | 0 | 0 |
| BRA | Brazil | 7288 | Doverlândia          | 0.50 | 0.91 | 0.98 | 2449   | 0 | 0 |
| BRA | Brazil | 7289 | Edealina             | 0.60 | 0.91 | 0.98 | 771    | 0 | 0 |
| BRA | Brazil | 7290 | Edeia                | 0.59 | 0.88 | 0.95 | 2546   | 0 | 0 |
| BRA | Brazil | 7291 | Estrela Do Norte     | 0.68 | 0.97 | 1.00 | 422    | 0 | 0 |
| BRA | Brazil | 7292 | Faina                | 0.68 | 0.89 | 0.95 | 826    | 0 | 0 |
| BRA | Brazil | 7293 | Fazenda Nova         | 0.54 | 0.88 | 0.95 | 1608   | 0 | 0 |
| BRA | Brazil | 7294 | Firminopolis         | 0.39 | 0.83 | 0.94 | 5332   | 0 | 0 |
| BRA | Brazil | 7295 | Flores De Goias      | 0.40 | 0.82 | 0.94 | 6233   | 0 | 0 |
| BRA | Brazil | 7296 | Formosa              | 0.75 | 0.96 | 1.00 | 6186   | 0 | 0 |
| BRA | Brazil | 7297 | Formoso              | 0.51 | 0.95 | 1.00 | 1386   | 0 | 0 |
| BRA | Brazil | 7298 | Goianapolis          | 0.95 | 0.98 | 1.00 | 0      | 0 | 0 |
| BRA | Brazil | 7299 | Goiandira            | 0.70 | 0.92 | 0.98 | 551    | 0 | 0 |
| BRA | Brazil | 7300 | Goianesia            | 0.50 | 0.89 | 0.98 | 20609  | 0 | 0 |
| BRA | Brazil | 7301 | Goiania              | 0.56 | 0.90 | 0.99 | 365252 | 0 | 0 |
| BRA | Brazil | 7302 | Goianira             | 0.56 | 0.92 | 0.99 | 9299   | 0 | 0 |
| BRA | Brazil | 7303 | Goias                | 0.70 | 0.90 | 0.95 | 2343   | 0 | 0 |
| BRA | Brazil | 7304 | Goiatuba             | 0.54 | 0.91 | 0.98 | 8936   | 0 | 0 |

|     |        |      |                  |      |      |      |       |      |      |
|-----|--------|------|------------------|------|------|------|-------|------|------|
| BRA | Brazil | 7305 | Gouvelandia      | 0.64 | 0.93 | 0.98 | 914   | 0    | 0    |
| BRA | Brazil | 7306 | Guapo            | 0.64 | 0.92 | 0.99 | 2332  | 0    | 0    |
| BRA | Brazil | 7307 | Guaraita         | 0.77 | 0.92 | 0.96 | 76    | 0    | 0    |
| BRA | Brazil | 7308 | Guarani De Goias | 0.37 | 0.84 | 0.98 | 1957  | 0    | 0    |
| BRA | Brazil | 7309 | Guarinos         | 0.56 | 0.90 | 0.96 | 510   | 0    | 0    |
| BRA | Brazil | 7310 | Heitorai         | 0.58 | 0.91 | 0.97 | 806   | 0    | 0    |
| BRA | Brazil | 7311 | Hidrolandia      | 0.21 | 0.66 | 0.75 | 12742 | 3112 | 1006 |
| BRA | Brazil | 7312 | Hidrolina        | 0.51 | 0.89 | 0.96 | 1125  | 0    | 0    |
| BRA | Brazil | 7313 | Iaciara          | 0.72 | 0.92 | 0.97 | 1038  | 0    | 0    |
| BRA | Brazil | 7314 | Inaciolandia     | 0.61 | 0.92 | 0.99 | 1142  | 0    | 0    |
| BRA | Brazil | 7315 | Indiara          | 0.63 | 0.91 | 0.98 | 2601  | 0    | 0    |
| BRA | Brazil | 7316 | Inhumas          | 0.59 | 0.91 | 0.97 | 11273 | 0    | 0    |
| BRA | Brazil | 7317 | Ipameri          | 0.78 | 0.92 | 0.98 | 453   | 0    | 0    |
| BRA | Brazil | 7318 | Ipora            | 0.68 | 0.94 | 1.00 | 3728  | 0    | 0    |
| BRA | Brazil | 7319 | Israelandia      | 0.59 | 0.87 | 0.95 | 608   | 0    | 0    |
| BRA | Brazil | 7320 | Itaberai         | 0.55 | 0.90 | 0.99 | 10252 | 0    | 0    |
| BRA | Brazil | 7321 | Itaguari         | 0.49 | 0.92 | 0.99 | 1434  | 0    | 0    |
| BRA | Brazil | 7322 | Itaguaru         | 0.70 | 0.91 | 0.96 | 537   | 0    | 0    |
| BRA | Brazil | 7323 | Itaja            | 0.69 | 0.90 | 0.96 | 694   | 0    | 0    |
| BRA | Brazil | 7324 | Itapaci          | 0.50 | 0.91 | 0.98 | 6562  | 0    | 0    |
| BRA | Brazil | 7325 | Itapirapua       | 0.56 | 0.91 | 0.99 | 1644  | 0    | 0    |
| BRA | Brazil | 7326 | Itapuranga       | 0.78 | 0.94 | 0.98 | 544   | 0    | 0    |
| BRA | Brazil | 7327 | Itaruma          | 0.32 | 0.83 | 0.96 | 3340  | 0    | 0    |
| BRA | Brazil | 7328 | Itaucu           | 0.65 | 0.90 | 0.97 | 1339  | 0    | 0    |
| BRA | Brazil | 7329 | Itumbiara        | 0.52 | 0.88 | 0.97 | 29152 | 0    | 0    |
| BRA | Brazil | 7330 | Ivolandia        | 0.48 | 0.86 | 0.95 | 834   | 0    | 0    |
| BRA | Brazil | 7331 | Jandaia          | 0.80 | 0.93 | 0.97 | 9     | 0    | 0    |
| BRA | Brazil | 7332 | Jaragua          | 0.58 | 0.89 | 0.98 | 10734 | 0    | 0    |
| BRA | Brazil | 7333 | Jatai            | 0.43 | 0.92 | 1.00 | 36066 | 0    | 0    |
| BRA | Brazil | 7334 | Jaupaci          | 0.75 | 0.92 | 0.98 | 152   | 0    | 0    |
| BRA | Brazil | 7335 | Jesupolis        | 0.55 | 0.89 | 0.97 | 634   | 0    | 0    |
| BRA | Brazil | 7336 | Joviania         | 0.61 | 0.90 | 0.97 | 1398  | 0    | 0    |
| BRA | Brazil | 7337 | Jussara          | 0.21 | 0.66 | 0.75 | 11436 | 2793 | 903  |

|     |        |      |                        |      |      |      |       |      |      |
|-----|--------|------|------------------------|------|------|------|-------|------|------|
| BRA | Brazil | 7338 | Leopoldo De Bulhoes    | 0.59 | 0.88 | 0.94 | 1940  | 0    | 0    |
| BRA | Brazil | 7339 | Luziania               | 0.58 | 0.91 | 1.00 | 44272 | 0    | 0    |
| BRA | Brazil | 7340 | Mairipotaba            | 0.83 | 0.91 | 0.96 | 0     | 0    | 0    |
| BRA | Brazil | 7341 | Mambai                 | 0.38 | 0.89 | 1.00 | 3395  | 0    | 0    |
| BRA | Brazil | 7342 | Mara Rosa              | 0.87 | 0.97 | 1.00 | 0     | 0    | 0    |
| BRA | Brazil | 7343 | Marzagao               | 0.94 | 0.95 | 0.97 | 0     | 0    | 0    |
| BRA | Brazil | 7344 | Matrincha              | 0.84 | 0.94 | 0.98 | 0     | 0    | 0    |
| BRA | Brazil | 7345 | Maurilandia            | 0.73 | 0.95 | 0.99 | 840   | 0    | 0    |
| BRA | Brazil | 7346 | Mimoso De Goias        | 0.43 | 0.87 | 0.96 | 999   | 0    | 0    |
| BRA | Brazil | 7347 | Minacu                 | 0.72 | 0.95 | 1.00 | 2392  | 0    | 0    |
| BRA | Brazil | 7348 | Mineiros               | 0.58 | 0.92 | 0.98 | 14014 | 0    | 0    |
| BRA | Brazil | 7349 | Moipora                | 0.65 | 0.88 | 0.94 | 258   | 0    | 0    |
| BRA | Brazil | 7350 | Monte Alegre De Goias  | 0.45 | 0.86 | 0.97 | 2936  | 0    | 0    |
| BRA | Brazil | 7351 | Montes Claros De Goias | 0.45 | 0.88 | 0.97 | 2858  | 0    | 0    |
| BRA | Brazil | 7352 | Montividiu             | 0.55 | 0.91 | 0.99 | 3185  | 0    | 0    |
| BRA | Brazil | 7353 | Montividiu Do Norte    | 0.62 | 0.93 | 0.97 | 819   | 0    | 0    |
| BRA | Brazil | 7354 | Morrinhos              | 0.21 | 0.66 | 0.75 | 26823 | 6551 | 2118 |
| BRA | Brazil | 7355 | Morro Agudo De Goias   | 0.96 | 0.97 | 0.98 | 0     | 0    | 0    |
| BRA | Brazil | 7356 | Mossamedes             | 0.60 | 0.85 | 0.94 | 981   | 0    | 0    |
| BRA | Brazil | 7357 | Mozarlandia            | 0.61 | 0.92 | 0.99 | 2844  | 0    | 0    |
| BRA | Brazil | 7358 | Mundo Novo             | 0.21 | 0.66 | 0.75 | 3515  | 859  | 278  |
| BRA | Brazil | 7359 | Mutunopolis            | 0.62 | 0.91 | 0.97 | 675   | 0    | 0    |
| BRA | Brazil | 7360 | Nazario                | 0.61 | 0.89 | 0.97 | 1683  | 0    | 0    |
| BRA | Brazil | 7361 | Neropolis              | 0.64 | 0.92 | 0.99 | 4420  | 0    | 0    |
| BRA | Brazil | 7362 | Niquelandia            | 0.52 | 0.91 | 0.98 | 12964 | 0    | 0    |
| BRA | Brazil | 7363 | Nova America           | 0.64 | 0.93 | 0.98 | 374   | 0    | 0    |
| BRA | Brazil | 7364 | Nova Aurora            | 0.99 | 1.00 | 1.00 | 0     | 0    | 0    |
| BRA | Brazil | 7365 | Nova Crixas            | 0.76 | 0.92 | 0.98 | 561   | 0    | 0    |
| BRA | Brazil | 7366 | Nova Gloria            | 0.71 | 0.92 | 0.97 | 778   | 0    | 0    |
| BRA | Brazil | 7367 | Nova Iguacu De Goias   | 0.62 | 0.92 | 0.99 | 541   | 0    | 0    |
| BRA | Brazil | 7368 | Nova Roma              | 0.56 | 0.89 | 0.97 | 824   | 0    | 0    |
| BRA | Brazil | 7369 | Nova Veneza            | 0.68 | 0.89 | 0.96 | 1152  | 0    | 0    |
| BRA | Brazil | 7370 | Novo Brasil            | 0.83 | 0.92 | 0.96 | 0     | 0    | 0    |

|     |        |      |                     |      |      |      |       |      |     |
|-----|--------|------|---------------------|------|------|------|-------|------|-----|
| BRA | Brazil | 7371 | Novo Gama           | 0.47 | 0.89 | 0.99 | 33190 | 0    | 0   |
| BRA | Brazil | 7372 | Novo Planalto       | 0.54 | 0.88 | 0.97 | 1127  | 0    | 0   |
| BRA | Brazil | 7373 | Orizona             | 0.61 | 0.88 | 0.96 | 2945  | 0    | 0   |
| BRA | Brazil | 7374 | Ouro Verde De Goias | 0.67 | 0.90 | 0.97 | 529   | 0    | 0   |
| BRA | Brazil | 7375 | Ouvidor             | 0.50 | 0.86 | 0.96 | 1895  | 0    | 0   |
| BRA | Brazil | 7376 | Padre Bernardo      | 0.56 | 0.87 | 0.98 | 7518  | 0    | 0   |
| BRA | Brazil | 7377 | Palestina De Goias  | 0.52 | 0.88 | 0.96 | 981   | 0    | 0   |
| BRA | Brazil | 7378 | Palmeiras De Goias  | 0.60 | 0.90 | 0.96 | 5613  | 0    | 0   |
| BRA | Brazil | 7379 | Palmelo             | 0.58 | 0.90 | 0.97 | 444   | 0    | 0   |
| BRA | Brazil | 7380 | Palminopolis        | 0.46 | 0.88 | 0.96 | 1235  | 0    | 0   |
| BRA | Brazil | 7381 | Panama              | 0.56 | 0.90 | 0.97 | 629   | 0    | 0   |
| BRA | Brazil | 7382 | Paranaiguara        | 0.48 | 0.88 | 0.97 | 2988  | 0    | 0   |
| BRA | Brazil | 7383 | Parauna             | 0.62 | 0.93 | 0.99 | 2035  | 0    | 0   |
| BRA | Brazil | 7384 | Perolandia          | 0.67 | 0.92 | 0.99 | 420   | 0    | 0   |
| BRA | Brazil | 7385 | Petrolina De Goias  | 0.67 | 0.89 | 0.95 | 1437  | 0    | 0   |
| BRA | Brazil | 7386 | Pilar De Goias      | 0.77 | 0.90 | 0.94 | 77    | 0    | 0   |
| BRA | Brazil | 7387 | Piracanjuba         | 0.71 | 0.90 | 0.96 | 2161  | 0    | 0   |
| BRA | Brazil | 7388 | Piranhas            | 0.21 | 0.66 | 0.75 | 6596  | 1611 | 521 |
| BRA | Brazil | 7389 | Pirenopolis         | 0.64 | 0.90 | 0.98 | 3868  | 0    | 0   |
| BRA | Brazil | 7390 | Pires Do Rio        | 0.74 | 0.91 | 0.97 | 1956  | 0    | 0   |
| BRA | Brazil | 7391 | Planaltina          | 0.83 | 0.96 | 1.00 | 0     | 0    | 0   |
| BRA | Brazil | 7392 | Pontalina           | 0.54 | 0.88 | 0.97 | 4636  | 0    | 0   |
| BRA | Brazil | 7393 | Porangatu           | 0.58 | 0.90 | 0.98 | 10149 | 0    | 0   |
| BRA | Brazil | 7394 | Porteirao           | 0.71 | 0.92 | 0.98 | 343   | 0    | 0   |
| BRA | Brazil | 7395 | Portelandia         | 0.65 | 0.91 | 0.98 | 618   | 0    | 0   |
| BRA | Brazil | 7396 | Posse               | 0.71 | 0.95 | 1.00 | 3325  | 0    | 0   |
| BRA | Brazil | 7397 | Professor Jamil     | 0.49 | 0.85 | 0.96 | 1045  | 0    | 0   |
| BRA | Brazil | 7398 | Quirinopolis        | 0.50 | 0.89 | 0.97 | 14787 | 0    | 0   |
| BRA | Brazil | 7399 | Rialma              | 0.90 | 0.94 | 0.96 | 0     | 0    | 0   |
| BRA | Brazil | 7400 | Rianapolis          | 0.74 | 0.94 | 0.99 | 250   | 0    | 0   |
| BRA | Brazil | 7401 | Rio Quente          | 0.92 | 0.95 | 0.98 | 0     | 0    | 0   |
| BRA | Brazil | 7402 | Rio Verde           | 0.53 | 0.90 | 0.98 | 61355 | 0    | 0   |
| BRA | Brazil | 7403 | Rubiataba           | 0.67 | 0.90 | 0.98 | 2521  | 0    | 0   |

|     |        |      |                             |      |      |      |       |      |     |
|-----|--------|------|-----------------------------|------|------|------|-------|------|-----|
| BRA | Brazil | 7404 | Sanclerlandia               | 0.59 | 0.90 | 0.97 | 1636  | 0    | 0   |
| BRA | Brazil | 7405 | Santa Barbara De Goias      | 0.58 | 0.94 | 0.99 | 1376  | 0    | 0   |
| BRA | Brazil | 7406 | Santa Cruz De Goias         | 0.66 | 0.87 | 0.92 | 487   | 0    | 0   |
| BRA | Brazil | 7407 | Santa Fe De Goias           | 0.70 | 0.93 | 0.98 | 517   | 0    | 0   |
| BRA | Brazil | 7408 | Santa Helena De Goias       | 0.66 | 0.92 | 0.98 | 5228  | 0    | 0   |
| BRA | Brazil | 7409 | Santa Isabel                | 0.92 | 0.96 | 0.99 | 0     | 0    | 0   |
| BRA | Brazil | 7410 | Santa Rita Do Araguaia      | 0.57 | 0.87 | 0.96 | 2010  | 0    | 0   |
| BRA | Brazil | 7411 | Santa Rita Do Novo Destino  | 0.79 | 0.90 | 0.94 | 20    | 0    | 0   |
| BRA | Brazil | 7412 | Santa Rosa De Goias         | 0.60 | 0.91 | 0.98 | 558   | 0    | 0   |
| BRA | Brazil | 7413 | Santa Tereza De Goias       | 0.53 | 0.93 | 0.99 | 1026  | 0    | 0   |
| BRA | Brazil | 7414 | Santa Terezinha De Goias    | 0.73 | 0.92 | 0.97 | 673   | 0    | 0   |
| BRA | Brazil | 7415 | Santo Antonio Da Barra      | 0.68 | 0.91 | 0.98 | 588   | 0    | 0   |
| BRA | Brazil | 7416 | Santo Antonio De Goias      | 0.54 | 0.91 | 0.99 | 1600  | 0    | 0   |
| BRA | Brazil | 7417 | Santo Antonio Do Descoberto | 0.47 | 0.89 | 1.00 | 22614 | 0    | 0   |
| BRA | Brazil | 7418 | Sao Domingos                | 0.21 | 0.66 | 0.75 | 7479  | 1827 | 591 |
| BRA | Brazil | 7419 | Sao Francisco De Goias      | 0.57 | 0.88 | 0.97 | 1427  | 0    | 0   |
| BRA | Brazil | 7420 | Sao Joao D'alianca          | 0.49 | 0.86 | 0.96 | 4113  | 0    | 0   |
| BRA | Brazil | 7421 | Sao Joao Da Parauna         | 0.67 | 0.92 | 0.99 | 217   | 0    | 0   |
| BRA | Brazil | 7422 | Sao Luis De Montes Belos    | 0.43 | 0.85 | 0.95 | 12112 | 0    | 0   |
| BRA | Brazil | 7423 | Sao Luiz Do Norte           | 0.51 | 0.90 | 0.98 | 1481  | 0    | 0   |
| BRA | Brazil | 7424 | Sao Miguel Do Araguaia      | 0.72 | 0.93 | 0.99 | 1838  | 0    | 0   |
| BRA | Brazil | 7425 | Sao Miguel Do Passa Quatro  | 0.50 | 0.91 | 0.98 | 1215  | 0    | 0   |
| BRA | Brazil | 7426 | Sao Patricio                | 0.47 | 0.86 | 0.97 | 642   | 0    | 0   |
| BRA | Brazil | 7427 | Sao Simao                   | 0.49 | 0.88 | 0.96 | 6281  | 0    | 0   |
| BRA | Brazil | 7428 | Senador Canedo              | 0.63 | 0.92 | 0.99 | 17398 | 0    | 0   |
| BRA | Brazil | 7429 | Serranopolis                | 0.61 | 0.91 | 0.99 | 1567  | 0    | 0   |
| BRA | Brazil | 7430 | Silvania                    | 0.38 | 0.86 | 0.95 | 12656 | 0    | 0   |
| BRA | Brazil | 7431 | Simolandia                  | 0.61 | 0.90 | 0.99 | 1190  | 0    | 0   |
| BRA | Brazil | 7432 | Sitio D'abadia              | 0.32 | 0.83 | 0.95 | 1469  | 0    | 0   |
| BRA | Brazil | 7433 | Taquaral De Goias           | 0.43 | 0.88 | 0.97 | 1355  | 0    | 0   |
| BRA | Brazil | 7434 | Teresina De Goias           | 0.65 | 0.94 | 1.00 | 490   | 0    | 0   |
| BRA | Brazil | 7435 | Terezopolis De Goias        | 0.60 | 0.91 | 0.98 | 1514  | 0    | 0   |
| BRA | Brazil | 7436 | Tres Ranchos                | 0.71 | 0.92 | 0.97 | 268   | 0    | 0   |

|     |        |      |                         |      |      |      |       |   |   |
|-----|--------|------|-------------------------|------|------|------|-------|---|---|
| BRA | Brazil | 7437 | Trindade                | 0.39 | 0.87 | 1.00 | 47726 | 0 | 0 |
| BRA | Brazil | 7438 | Trombas                 | 0.60 | 0.88 | 0.95 | 702   | 0 | 0 |
| BRA | Brazil | 7439 | Turvania                | 0.68 | 0.92 | 0.97 | 605   | 0 | 0 |
| BRA | Brazil | 7440 | Turvelandia             | 0.56 | 0.88 | 0.97 | 1561  | 0 | 0 |
| BRA | Brazil | 7441 | Uirapuru                | 0.51 | 0.91 | 0.98 | 855   | 0 | 0 |
| BRA | Brazil | 7442 | Uruacu                  | 0.73 | 0.93 | 0.98 | 2837  | 0 | 0 |
| BRA | Brazil | 7443 | Uruana                  | 0.53 | 0.89 | 0.98 | 3790  | 0 | 0 |
| BRA | Brazil | 7444 | Urutai                  | 0.69 | 0.88 | 0.94 | 338   | 0 | 0 |
| BRA | Brazil | 7445 | Valparaiso De Goias     | 0.50 | 0.90 | 1.00 | 47916 | 0 | 0 |
| BRA | Brazil | 7446 | Varjao                  | 0.57 | 0.90 | 0.97 | 841   | 0 | 0 |
| BRA | Brazil | 7447 | Vianopolis              | 0.63 | 0.92 | 0.99 | 2303  | 0 | 0 |
| BRA | Brazil | 7448 | Vicentinopolis          | 0.57 | 0.94 | 0.99 | 1895  | 0 | 0 |
| BRA | Brazil | 7449 | Vila Boa                | 0.70 | 0.93 | 1.00 | 603   | 0 | 0 |
| BRA | Brazil | 7450 | Vila Propicio           | 0.52 | 0.86 | 0.95 | 1578  | 0 | 0 |
| BRA | Brazil | 7451 | Acailandia              | 0.38 | 0.92 | 1.00 | 49326 | 0 | 0 |
| BRA | Brazil | 7452 | Afonso Cunha            | 0.36 | 0.85 | 0.98 | 2770  | 0 | 0 |
| BRA | Brazil | 7453 | Agua Doce Do Maranhao   | 0.35 | 0.85 | 0.99 | 5643  | 0 | 0 |
| BRA | Brazil | 7454 | Alcantara               | 0.34 | 0.87 | 0.98 | 10285 | 0 | 0 |
| BRA | Brazil | 7455 | Aldeias Altas           | 0.35 | 0.82 | 0.94 | 12628 | 0 | 0 |
| BRA | Brazil | 7456 | Altamira Do Maranhao    | 0.46 | 0.93 | 1.00 | 1488  | 0 | 0 |
| BRA | Brazil | 7457 | Alto Alegre Do Maranhao | 0.35 | 0.85 | 0.99 | 13035 | 0 | 0 |
| BRA | Brazil | 7458 | Alto Alegre Do Pindare  | 0.35 | 0.87 | 0.99 | 16001 | 0 | 0 |
| BRA | Brazil | 7459 | Alto Parnaiba           | 0.35 | 0.85 | 0.99 | 5093  | 0 | 0 |
| BRA | Brazil | 7460 | Amapa Do Maranhao       | 0.39 | 0.92 | 1.00 | 3663  | 0 | 0 |
| BRA | Brazil | 7461 | Amarante Do Maranhao    | 0.35 | 0.86 | 1.00 | 20344 | 0 | 0 |
| BRA | Brazil | 7462 | Anajatuba               | 0.33 | 0.83 | 0.98 | 15312 | 0 | 0 |
| BRA | Brazil | 7463 | Anapurus                | 0.35 | 0.86 | 0.99 | 7387  | 0 | 0 |
| BRA | Brazil | 7464 | Apicum-acu              | 0.34 | 0.81 | 0.94 | 7031  | 0 | 0 |
| BRA | Brazil | 7465 | Araguana                | 0.35 | 0.86 | 0.99 | 8060  | 0 | 0 |
| BRA | Brazil | 7466 | Araioses                | 0.35 | 0.84 | 0.97 | 21144 | 0 | 0 |
| BRA | Brazil | 7467 | Arame                   | 0.34 | 0.85 | 0.98 | 12195 | 0 | 0 |
| BRA | Brazil | 7468 | Arari                   | 0.36 | 0.89 | 1.00 | 13405 | 0 | 0 |
| BRA | Brazil | 7469 | Axixa                   | 0.36 | 0.87 | 1.00 | 5622  | 0 | 0 |

|     |        |      |                        |      |      |      |       |   |   |
|-----|--------|------|------------------------|------|------|------|-------|---|---|
| BRA | Brazil | 7470 | Bacabal                | 0.36 | 0.86 | 1.00 | 43037 | 0 | 0 |
| BRA | Brazil | 7471 | Bacabeira              | 0.40 | 0.87 | 0.98 | 7771  | 0 | 0 |
| BRA | Brazil | 7472 | Bacuri                 | 0.35 | 0.81 | 0.93 | 8015  | 0 | 0 |
| BRA | Brazil | 7473 | Bacurituba             | 0.36 | 0.86 | 0.99 | 2167  | 0 | 0 |
| BRA | Brazil | 7474 | Balsas                 | 0.39 | 0.89 | 1.00 | 41618 | 0 | 0 |
| BRA | Brazil | 7475 | Barao De Grajau        | 0.33 | 0.81 | 0.94 | 9723  | 0 | 0 |
| BRA | Brazil | 7476 | Barra Do Corda         | 0.36 | 0.86 | 1.00 | 42401 | 0 | 0 |
| BRA | Brazil | 7477 | Barreirinhas           | 0.36 | 0.88 | 1.00 | 25352 | 0 | 0 |
| BRA | Brazil | 7478 | Bela Vista Do Maranhao | 0.35 | 0.84 | 0.98 | 5949  | 0 | 0 |
| BRA | Brazil | 7479 | Belagua                | 0.36 | 0.83 | 0.95 | 3800  | 0 | 0 |
| BRA | Brazil | 7480 | Benedito Leite         | 0.40 | 0.89 | 1.00 | 2546  | 0 | 0 |
| BRA | Brazil | 7481 | Bequimao               | 0.35 | 0.83 | 0.95 | 9649  | 0 | 0 |
| BRA | Brazil | 7482 | Bernardo Do Mearim     | 0.35 | 0.82 | 0.94 | 3263  | 0 | 0 |
| BRA | Brazil | 7483 | Boa Vista Do Gurupi    | 0.37 | 0.88 | 1.00 | 3386  | 0 | 0 |
| BRA | Brazil | 7484 | Bom Jardim             | 0.34 | 0.83 | 0.97 | 22221 | 0 | 0 |
| BRA | Brazil | 7485 | Bom Jesus Das Selvas   | 0.34 | 0.88 | 1.00 | 18529 | 0 | 0 |
| BRA | Brazil | 7486 | Bom Lugar              | 0.40 | 0.89 | 1.00 | 5394  | 0 | 0 |
| BRA | Brazil | 7487 | Brejo                  | 0.35 | 0.84 | 0.97 | 16939 | 0 | 0 |
| BRA | Brazil | 7488 | Brejo De Areia         | 0.43 | 0.91 | 1.00 | 1603  | 0 | 0 |
| BRA | Brazil | 7489 | Buriti                 | 0.36 | 0.86 | 0.99 | 13186 | 0 | 0 |
| BRA | Brazil | 7490 | Buriti Bravo           | 0.34 | 0.81 | 0.93 | 11897 | 0 | 0 |
| BRA | Brazil | 7491 | Buriticupu             | 0.35 | 0.86 | 1.00 | 34118 | 0 | 0 |
| BRA | Brazil | 7492 | Buritirana             | 0.41 | 0.91 | 1.00 | 4200  | 0 | 0 |
| BRA | Brazil | 7493 | Cachoeira Grande       | 0.36 | 0.87 | 0.99 | 4326  | 0 | 0 |
| BRA | Brazil | 7494 | Cajapio                | 0.35 | 0.86 | 0.99 | 5268  | 0 | 0 |
| BRA | Brazil | 7495 | Cajari                 | 0.38 | 0.89 | 1.00 | 6459  | 0 | 0 |
| BRA | Brazil | 7496 | Campestre Do Maranhao  | 0.39 | 0.92 | 1.00 | 6174  | 0 | 0 |
| BRA | Brazil | 7497 | Candido Mendes         | 0.34 | 0.83 | 0.98 | 11168 | 0 | 0 |
| BRA | Brazil | 7498 | Cantanhede             | 0.36 | 0.84 | 0.97 | 10380 | 0 | 0 |
| BRA | Brazil | 7499 | Capinzal Do Norte      | 0.36 | 0.88 | 1.00 | 5058  | 0 | 0 |
| BRA | Brazil | 7500 | Carolina               | 0.36 | 0.89 | 1.00 | 10952 | 0 | 0 |
| BRA | Brazil | 7501 | Carutapera             | 0.36 | 0.90 | 1.00 | 10400 | 0 | 0 |
| BRA | Brazil | 7502 | Caxias                 | 0.35 | 0.83 | 0.96 | 76645 | 0 | 0 |

|     |        |      |                           |      |      |      |       |      |     |
|-----|--------|------|---------------------------|------|------|------|-------|------|-----|
| BRA | Brazil | 7503 | Cedral                    | 0.40 | 0.91 | 1.00 | 3809  | 0    | 0   |
| BRA | Brazil | 7504 | Central Do Maranhao       | 0.35 | 0.88 | 0.99 | 4123  | 0    | 0   |
| BRA | Brazil | 7505 | Centro Do Guilherme       | 0.34 | 0.84 | 0.99 | 7861  | 0    | 0   |
| BRA | Brazil | 7506 | Centro Novo Do Maranhao   | 0.35 | 0.87 | 1.00 | 8613  | 0    | 0   |
| BRA | Brazil | 7507 | Chapadinha                | 0.36 | 0.86 | 0.99 | 36755 | 0    | 0   |
| BRA | Brazil | 7508 | Cidelandia                | 0.38 | 0.91 | 1.00 | 6449  | 0    | 0   |
| BRA | Brazil | 7509 | Codo                      | 0.36 | 0.86 | 1.00 | 54805 | 0    | 0   |
| BRA | Brazil | 7510 | Coelho Neto               | 0.35 | 0.84 | 0.97 | 22648 | 0    | 0   |
| BRA | Brazil | 7511 | Colinas                   | 0.40 | 0.91 | 1.00 | 15387 | 0    | 0   |
| BRA | Brazil | 7512 | Conceicao Do Lago-acu     | 0.34 | 0.84 | 0.98 | 7785  | 0    | 0   |
| BRA | Brazil | 7513 | Coroata                   | 0.35 | 0.85 | 0.99 | 29906 | 0    | 0   |
| BRA | Brazil | 7514 | Cururupu                  | 0.41 | 0.93 | 1.00 | 10723 | 0    | 0   |
| BRA | Brazil | 7515 | Davinopolis               | 0.21 | 0.66 | 0.75 | 7328  | 1790 | 579 |
| BRA | Brazil | 7516 | Dom Pedro                 | 0.35 | 0.86 | 0.99 | 13620 | 0    | 0   |
| BRA | Brazil | 7517 | Duque Bacelar             | 0.36 | 0.88 | 1.00 | 5078  | 0    | 0   |
| BRA | Brazil | 7518 | Esperantinopolis          | 0.34 | 0.81 | 0.92 | 9880  | 0    | 0   |
| BRA | Brazil | 7519 | Estreito                  | 0.39 | 0.88 | 1.00 | 18868 | 0    | 0   |
| BRA | Brazil | 7520 | Feira Nova Do Maranhao    | 0.36 | 0.86 | 0.99 | 4139  | 0    | 0   |
| BRA | Brazil | 7521 | Fernando Falcao           | 0.38 | 0.89 | 1.00 | 4283  | 0    | 0   |
| BRA | Brazil | 7522 | Formosa Da Serra Negra    | 0.34 | 0.85 | 0.99 | 9319  | 0    | 0   |
| BRA | Brazil | 7523 | Fortaleza Dos Nogueiras   | 0.36 | 0.85 | 0.98 | 5304  | 0    | 0   |
| BRA | Brazil | 7524 | Fortuna                   | 0.36 | 0.88 | 1.00 | 6827  | 0    | 0   |
| BRA | Brazil | 7525 | Godofredo Viana           | 0.33 | 0.84 | 0.98 | 5602  | 0    | 0   |
| BRA | Brazil | 7526 | Goncalves Dias            | 0.35 | 0.85 | 0.99 | 8904  | 0    | 0   |
| BRA | Brazil | 7527 | Governador Archer         | 0.36 | 0.86 | 1.00 | 4805  | 0    | 0   |
| BRA | Brazil | 7528 | Governador Edison Lobao   | 0.37 | 0.89 | 1.00 | 8245  | 0    | 0   |
| BRA | Brazil | 7529 | Governador Eugenio Barros | 0.36 | 0.85 | 0.98 | 6713  | 0    | 0   |
| BRA | Brazil | 7530 | Governador Luiz Rocha     | 0.40 | 0.91 | 1.00 | 2917  | 0    | 0   |
| BRA | Brazil | 7531 | Governador Newton Bello   | 0.28 | 0.77 | 0.91 | 11140 | 604  | 0   |
| BRA | Brazil | 7532 | Governador Nunes Freire   | 0.36 | 0.88 | 1.00 | 11942 | 0    | 0   |
| BRA | Brazil | 7533 | Graca Aranha              | 0.38 | 0.86 | 0.98 | 3630  | 0    | 0   |
| BRA | Brazil | 7534 | Grajau                    | 0.37 | 0.89 | 1.00 | 30331 | 0    | 0   |
| BRA | Brazil | 7535 | Guimaraes                 | 0.34 | 0.84 | 0.98 | 5526  | 0    | 0   |



|     |        |      |                          |      |      |      |        |     |   |
|-----|--------|------|--------------------------|------|------|------|--------|-----|---|
| BRA | Brazil | 7536 | Humberto De Campos       | 0.36 | 0.85 | 0.98 | 12082  | 0   | 0 |
| BRA | Brazil | 7537 | Icatu                    | 0.33 | 0.82 | 0.95 | 13341  | 0   | 0 |
| BRA | Brazil | 7538 | Igarape Do Meio          | 0.34 | 0.82 | 0.95 | 5145   | 0   | 0 |
| BRA | Brazil | 7539 | Igarape Grande           | 0.39 | 0.86 | 0.99 | 3951   | 0   | 0 |
| BRA | Brazil | 7540 | Imperatriz               | 0.36 | 0.89 | 1.00 | 116547 | 0   | 0 |
| BRA | Brazil | 7541 | Itaipava Do Grajau       | 0.28 | 0.78 | 0.92 | 20042  | 874 | 0 |
| BRA | Brazil | 7542 | Itapecuru Mirim          | 0.35 | 0.86 | 0.99 | 29727  | 0   | 0 |
| BRA | Brazil | 7543 | Itinga Do Maranhao       | 0.42 | 0.90 | 1.00 | 8025   | 0   | 0 |
| BRA | Brazil | 7544 | Jatoba                   | 0.60 | 0.93 | 0.99 | 1642   | 0   | 0 |
| BRA | Brazil | 7545 | Jenipapo Dos Vieiras     | 0.47 | 0.95 | 1.00 | 3656   | 0   | 0 |
| BRA | Brazil | 7546 | Joao Lisboa              | 0.36 | 0.88 | 1.00 | 9504   | 0   | 0 |
| BRA | Brazil | 7547 | Joselandia               | 0.39 | 0.89 | 1.00 | 6806   | 0   | 0 |
| BRA | Brazil | 7548 | Junco Do Maranhao        | 0.41 | 0.93 | 1.00 | 1869   | 0   | 0 |
| BRA | Brazil | 7549 | Lago Da Pedra            | 0.34 | 0.85 | 0.99 | 38705  | 0   | 0 |
| BRA | Brazil | 7550 | Lago Do Junco            | 0.30 | 0.81 | 0.95 | 10105  | 0   | 0 |
| BRA | Brazil | 7551 | Lago Dos Rodrigues       | 0.61 | 0.98 | 1.00 | 503    | 0   | 0 |
| BRA | Brazil | 7552 | Lago Verde               | 0.40 | 0.90 | 1.00 | 2479   | 0   | 0 |
| BRA | Brazil | 7553 | Lagoa Do Mato            | 0.36 | 0.84 | 0.97 | 4767   | 0   | 0 |
| BRA | Brazil | 7554 | Lagoa Grande Do Maranhao | 0.38 | 0.88 | 1.00 | 3588   | 0   | 0 |
| BRA | Brazil | 7555 | Lajeado Novo             | 0.57 | 0.93 | 1.00 | 1830   | 0   | 0 |
| BRA | Brazil | 7556 | Lima Campos              | 0.34 | 0.86 | 0.99 | 5459   | 0   | 0 |
| BRA | Brazil | 7557 | Loreto                   | 0.37 | 0.86 | 0.99 | 5683   | 0   | 0 |
| BRA | Brazil | 7558 | Luis Domingues           | 0.38 | 0.90 | 1.00 | 2823   | 0   | 0 |
| BRA | Brazil | 7559 | Magalhaes De Almeida     | 0.31 | 0.78 | 0.90 | 11024  | 403 | 0 |
| BRA | Brazil | 7560 | Maracacume               | 0.35 | 0.86 | 0.99 | 11899  | 0   | 0 |
| BRA | Brazil | 7561 | Maraja Do Sena           | 0.50 | 0.92 | 1.00 | 1839   | 0   | 0 |
| BRA | Brazil | 7562 | Maranhaozinho            | 0.34 | 0.86 | 0.99 | 8487   | 0   | 0 |
| BRA | Brazil | 7563 | Mata Roma                | 0.35 | 0.82 | 0.94 | 7949   | 0   | 0 |
| BRA | Brazil | 7564 | Matinha                  | 0.34 | 0.83 | 0.96 | 11033  | 0   | 0 |
| BRA | Brazil | 7565 | Matoes                   | 0.35 | 0.85 | 0.98 | 14613  | 0   | 0 |
| BRA | Brazil | 7566 | Matoes Do Norte          | 0.29 | 0.79 | 0.94 | 8301   | 116 | 0 |
| BRA | Brazil | 7567 | Milagres Do Maranhao     | 0.36 | 0.87 | 0.99 | 4577   | 0   | 0 |
| BRA | Brazil | 7568 | Mirador                  | 0.39 | 0.90 | 0.99 | 8869   | 0   | 0 |

|     |        |      |                         |      |      |      |       |      |      |
|-----|--------|------|-------------------------|------|------|------|-------|------|------|
| BRA | Brazil | 7569 | Miranda Do Norte        | 0.31 | 0.79 | 0.93 | 16587 | 180  | 0    |
| BRA | Brazil | 7570 | Mirinzal                | 0.34 | 0.81 | 0.93 | 6952  | 0    | 0    |
| BRA | Brazil | 7571 | Moncao                  | 0.33 | 0.81 | 0.94 | 18753 | 0    | 0    |
| BRA | Brazil | 7572 | Montes Altos            | 0.43 | 0.89 | 1.00 | 3372  | 0    | 0    |
| BRA | Brazil | 7573 | Morros                  | 0.34 | 0.85 | 0.99 | 8373  | 0    | 0    |
| BRA | Brazil | 7574 | Nina Rodrigues          | 0.35 | 0.84 | 0.97 | 6876  | 0    | 0    |
| BRA | Brazil | 7575 | Nova Colinas            | 0.38 | 0.88 | 1.00 | 2442  | 0    | 0    |
| BRA | Brazil | 7576 | Nova Iorque             | 0.48 | 0.88 | 0.99 | 1486  | 0    | 0    |
| BRA | Brazil | 7577 | Nova Olinda Do Maranhao | 0.35 | 0.84 | 0.97 | 8910  | 0    | 0    |
| BRA | Brazil | 7578 | Olho D'agua Das Cunhas  | 0.34 | 0.83 | 0.96 | 10215 | 0    | 0    |
| BRA | Brazil | 7579 | Olinda Nova Do Maranhao | 0.34 | 0.82 | 0.95 | 7085  | 0    | 0    |
| BRA | Brazil | 7580 | Paco Do Lumiar          | 0.32 | 0.82 | 0.97 | 61105 | 0    | 0    |
| BRA | Brazil | 7581 | Palmeirandia            | 0.34 | 0.83 | 0.96 | 8355  | 0    | 0    |
| BRA | Brazil | 7582 | Paraibano               | 0.38 | 0.89 | 1.00 | 9325  | 0    | 0    |
| BRA | Brazil | 7583 | Parnarama               | 0.35 | 0.83 | 0.95 | 17012 | 0    | 0    |
| BRA | Brazil | 7584 | Passagem Franca         | 0.23 | 0.69 | 0.80 | 11089 | 2116 | 68   |
| BRA | Brazil | 7585 | Pastos Bons             | 0.36 | 0.86 | 1.00 | 9899  | 0    | 0    |
| BRA | Brazil | 7586 | Paulino Neves           | 0.32 | 0.83 | 0.97 | 9870  | 0    | 0    |
| BRA | Brazil | 7587 | Paulo Ramos             | 0.35 | 0.86 | 0.99 | 10260 | 0    | 0    |
| BRA | Brazil | 7588 | Pedreiras               | 0.36 | 0.88 | 0.99 | 20419 | 0    | 0    |
| BRA | Brazil | 7589 | Pedro Do Rosario        | 0.33 | 0.82 | 0.95 | 11439 | 0    | 0    |
| BRA | Brazil | 7590 | Penalva                 | 0.35 | 0.83 | 0.97 | 18091 | 0    | 0    |
| BRA | Brazil | 7591 | Peri Mirim              | 0.34 | 0.85 | 0.99 | 6536  | 0    | 0    |
| BRA | Brazil | 7592 | Peritoro                | 0.35 | 0.84 | 0.97 | 9785  | 0    | 0    |
| BRA | Brazil | 7593 | Pindare Mirim           | 0.30 | 0.78 | 0.91 | 31475 | 1379 | 0    |
| BRA | Brazil | 7594 | Pinheiro                | 0.35 | 0.86 | 1.00 | 39320 | 0    | 0    |
| BRA | Brazil | 7595 | Pio Xii                 | 0.55 | 0.97 | 1.00 | 856   | 0    | 0    |
| BRA | Brazil | 7596 | Pirapemas               | 0.35 | 0.86 | 1.00 | 9241  | 0    | 0    |
| BRA | Brazil | 7597 | Pocao De Pedras         | 0.35 | 0.85 | 0.99 | 10805 | 0    | 0    |
| BRA | Brazil | 7598 | Porto Franco            | 0.38 | 0.89 | 1.00 | 10699 | 0    | 0    |
| BRA | Brazil | 7599 | Porto Rico Do Maranhao  | 0.35 | 0.84 | 0.97 | 2910  | 0    | 0    |
| BRA | Brazil | 7600 | Presidente Dutra        | 0.21 | 0.66 | 0.75 | 29073 | 7101 | 2296 |
| BRA | Brazil | 7601 | Presidente Juscelino    | 0.37 | 0.90 | 1.00 | 6355  | 0    | 0    |

|     |        |      |                            |      |      |      |        |       |      |
|-----|--------|------|----------------------------|------|------|------|--------|-------|------|
| BRA | Brazil | 7602 | Presidente Medici          | 0.83 | 0.99 | 1.00 | 0      | 0     | 0    |
| BRA | Brazil | 7603 | Presidente Sarney          | 0.32 | 0.84 | 0.98 | 9203   | 0     | 0    |
| BRA | Brazil | 7604 | Presidente Vargas          | 0.37 | 0.88 | 1.00 | 4685   | 0     | 0    |
| BRA | Brazil | 7605 | Primeira Cruz              | 0.31 | 0.82 | 0.98 | 10104  | 0     | 0    |
| BRA | Brazil | 7606 | Raposa                     | 0.34 | 0.83 | 0.97 | 14276  | 0     | 0    |
| BRA | Brazil | 7607 | Riachao                    | 0.40 | 0.90 | 1.00 | 7887   | 0     | 0    |
| BRA | Brazil | 7608 | Ribamar Fiquene            | 0.38 | 0.88 | 1.00 | 3312   | 0     | 0    |
| BRA | Brazil | 7609 | Rosario                    | 0.35 | 0.85 | 0.99 | 19571  | 0     | 0    |
| BRA | Brazil | 7610 | Sambaiba                   | 0.33 | 0.85 | 0.98 | 2972   | 0     | 0    |
| BRA | Brazil | 7611 | Santa Filomena Do Maranhao | 0.40 | 0.90 | 1.00 | 2688   | 0     | 0    |
| BRA | Brazil | 7612 | Santa Helena               | 0.40 | 0.90 | 1.00 | 18525  | 0     | 0    |
| BRA | Brazil | 7613 | Santa Ines                 | 0.21 | 0.66 | 0.75 | 31388  | 7666  | 2478 |
| BRA | Brazil | 7614 | Santa Luzia                | 0.21 | 0.66 | 0.75 | 49249  | 12029 | 3889 |
| BRA | Brazil | 7615 | Santa Luzia Do Parua       | 0.37 | 0.89 | 1.00 | 12075  | 0     | 0    |
| BRA | Brazil | 7616 | Santa Quiteria Do Maranhao | 0.37 | 0.89 | 1.00 | 12957  | 0     | 0    |
| BRA | Brazil | 7617 | Santa Rita                 | 0.35 | 0.84 | 0.97 | 18137  | 0     | 0    |
| BRA | Brazil | 7618 | Santana Do Maranhao        | 0.35 | 0.81 | 0.93 | 9027   | 0     | 0    |
| BRA | Brazil | 7619 | Santo Amaro Do Maranhao    | 0.34 | 0.85 | 0.99 | 6276   | 0     | 0    |
| BRA | Brazil | 7620 | Santo Antonio Dos Lopes    | 0.53 | 0.95 | 1.00 | 2651   | 0     | 0    |
| BRA | Brazil | 7621 | Sao Benedito Do Rio Preto  | 0.35 | 0.82 | 0.94 | 8918   | 0     | 0    |
| BRA | Brazil | 7622 | Sao Bento                  | 0.33 | 0.80 | 0.93 | 23017  | 5     | 0    |
| BRA | Brazil | 7623 | Sao Bernardo               | 0.36 | 0.85 | 0.99 | 14510  | 0     | 0    |
| BRA | Brazil | 7624 | Sao Domingos Do Azeitao    | 0.38 | 0.89 | 1.00 | 2598   | 0     | 0    |
| BRA | Brazil | 7625 | Sao Domingos Do Maranhao   | 0.40 | 0.88 | 1.00 | 14875  | 0     | 0    |
| BRA | Brazil | 7626 | Sao Felix De Balsas        | 0.46 | 0.88 | 0.99 | 2093   | 0     | 0    |
| BRA | Brazil | 7627 | Sao Francisco Do Brejao    | 0.36 | 0.89 | 1.00 | 5325   | 0     | 0    |
| BRA | Brazil | 7628 | Sao Francisco Do Maranhao  | 0.32 | 0.82 | 0.96 | 6667   | 0     | 0    |
| BRA | Brazil | 7629 | Sao Joao Batista           | 0.34 | 0.80 | 0.91 | 9870   | 0     | 0    |
| BRA | Brazil | 7630 | Sao Joao Do Caru           | 0.36 | 0.89 | 1.00 | 5361   | 0     | 0    |
| BRA | Brazil | 7631 | Sao Joao Do Paraiso        | 0.75 | 0.98 | 1.00 | 617    | 0     | 0    |
| BRA | Brazil | 7632 | Sao Joao Do Soter          | 0.35 | 0.84 | 0.98 | 9243   | 0     | 0    |
| BRA | Brazil | 7633 | Sao Joao Dos Patos         | 0.35 | 0.87 | 1.00 | 12151  | 0     | 0    |
| BRA | Brazil | 7634 | Sao Jose De Ribamar        | 0.33 | 0.84 | 0.99 | 106678 | 0     | 0    |

|     |        |      |                              |      |      |      |        |      |      |
|-----|--------|------|------------------------------|------|------|------|--------|------|------|
| BRA | Brazil | 7635 | Sao Jose Dos Basilios        | 0.44 | 0.90 | 1.00 | 2968   | 0    | 0    |
| BRA | Brazil | 7636 | Sao Luis                     | 0.36 | 0.88 | 1.00 | 483059 | 0    | 0    |
| BRA | Brazil | 7637 | Sao Luis Gonzaga Do Maranhao | 0.31 | 0.81 | 0.96 | 17372  | 0    | 0    |
| BRA | Brazil | 7638 | Sao Mateus Do Maranhao       | 0.35 | 0.86 | 0.99 | 18387  | 0    | 0    |
| BRA | Brazil | 7639 | Sao Pedro Da Agua Branca     | 0.45 | 0.93 | 1.00 | 3396   | 0    | 0    |
| BRA | Brazil | 7640 | Sao Pedro Dos Crentes        | 0.50 | 0.92 | 1.00 | 1387   | 0    | 0    |
| BRA | Brazil | 7641 | Sao Raimundo Das Mangabeiras | 0.35 | 0.84 | 0.97 | 8730   | 0    | 0    |
| BRA | Brazil | 7642 | Sao Raimundo Do Doca Bezerra | 0.43 | 0.91 | 1.00 | 1861   | 0    | 0    |
| BRA | Brazil | 7643 | Sao Roberto                  | 0.35 | 0.81 | 0.92 | 3242   | 0    | 0    |
| BRA | Brazil | 7644 | Sao Vicente Ferrer           | 0.35 | 0.85 | 0.99 | 10271  | 0    | 0    |
| BRA | Brazil | 7645 | Satubinha                    | 0.38 | 0.88 | 0.99 | 1917   | 0    | 0    |
| BRA | Brazil | 7646 | Senador Alexandre Costa      | 0.37 | 0.85 | 0.98 | 4575   | 0    | 0    |
| BRA | Brazil | 7647 | Senador La Rocque            | 0.36 | 0.87 | 1.00 | 9986   | 0    | 0    |
| BRA | Brazil | 7648 | Serrano Do Maranhao          | 0.26 | 0.75 | 0.89 | 10153  | 908  | 0    |
| BRA | Brazil | 7649 | Sitio Novo                   | 0.35 | 0.87 | 1.00 | 8093   | 0    | 0    |
| BRA | Brazil | 7650 | Sucupira Do Norte            | 0.40 | 0.86 | 0.98 | 3418   | 0    | 0    |
| BRA | Brazil | 7651 | Sucupira Do Riachao          | 0.38 | 0.89 | 1.00 | 2085   | 0    | 0    |
| BRA | Brazil | 7652 | Tasso Fragoso                | 0.37 | 0.85 | 0.98 | 3686   | 0    | 0    |
| BRA | Brazil | 7653 | Timbiras                     | 0.34 | 0.81 | 0.93 | 12763  | 0    | 0    |
| BRA | Brazil | 7654 | Timon                        | 0.34 | 0.81 | 0.94 | 83983  | 0    | 0    |
| BRA | Brazil | 7655 | Trizidela Do Vale            | 0.36 | 0.88 | 1.00 | 6080   | 0    | 0    |
| BRA | Brazil | 7656 | Tufilandia                   | 0.45 | 0.93 | 1.00 | 1035   | 0    | 0    |
| BRA | Brazil | 7657 | Tuntum                       | 0.36 | 0.86 | 1.00 | 20923  | 0    | 0    |
| BRA | Brazil | 7658 | Turiacu                      | 0.35 | 0.87 | 1.00 | 16399  | 0    | 0    |
| BRA | Brazil | 7659 | Turilandia                   | 0.35 | 0.84 | 0.97 | 10458  | 0    | 0    |
| BRA | Brazil | 7660 | Tutoia                       | 0.36 | 0.89 | 1.00 | 24919  | 0    | 0    |
| BRA | Brazil | 7661 | Urbano Santos                | 0.36 | 0.85 | 0.99 | 13713  | 0    | 0    |
| BRA | Brazil | 7662 | Vargem Grande                | 0.35 | 0.84 | 0.97 | 27632  | 0    | 0    |
| BRA | Brazil | 7663 | Viana                        | 0.21 | 0.66 | 0.75 | 32530  | 7945 | 2569 |
| BRA | Brazil | 7664 | Vila Nova Dos Martirios      | 0.34 | 0.86 | 0.99 | 6935   | 0    | 0    |
| BRA | Brazil | 7665 | Vitoria Do Mearim            | 0.35 | 0.86 | 1.00 | 18233  | 0    | 0    |
| BRA | Brazil | 7666 | Vitorino Freire              | 0.43 | 0.91 | 0.99 | 6730   | 0    | 0    |
| BRA | Brazil | 7667 | Ze Doca                      | 0.21 | 0.66 | 0.75 | 24848  | 6069 | 1962 |

|     |        |      |                       |      |      |      |        |        |       |
|-----|--------|------|-----------------------|------|------|------|--------|--------|-------|
| BRA | Brazil | 7668 | Agua Clara            | 0.65 | 0.92 | 0.99 | 2440   | 0      | 0     |
| BRA | Brazil | 7669 | Alcinopolis           | 0.39 | 0.88 | 0.99 | 2172   | 0      | 0     |
| BRA | Brazil | 7670 | Amambai               | 0.47 | 0.91 | 1.00 | 12923  | 0      | 0     |
| BRA | Brazil | 7671 | Anastacio             | 0.50 | 0.88 | 0.99 | 7785   | 0      | 0     |
| BRA | Brazil | 7672 | Anaurilandia          | 0.42 | 0.87 | 0.98 | 3446   | 0      | 0     |
| BRA | Brazil | 7673 | Angelica              | 0.39 | 0.89 | 0.99 | 4325   | 0      | 0     |
| BRA | Brazil | 7674 | Antonio Joao          | 0.55 | 0.93 | 1.00 | 2393   | 0      | 0     |
| BRA | Brazil | 7675 | Aparecida Do Taboado  | 0.49 | 0.88 | 0.98 | 7796   | 0      | 0     |
| BRA | Brazil | 7676 | Aquidauana            | 0.57 | 0.92 | 1.00 | 11282  | 0      | 0     |
| BRA | Brazil | 7677 | Aral Moreira          | 0.45 | 0.89 | 1.00 | 4181   | 0      | 0     |
| BRA | Brazil | 7678 | Bandeirantes          | 0.88 | 1.00 | 1.00 | 0      | 0      | 0     |
| BRA | Brazil | 7679 | Bataguassu            | 0.53 | 0.89 | 0.99 | 6104   | 0      | 0     |
| BRA | Brazil | 7680 | Bataipora             | 0.59 | 0.92 | 1.00 | 2365   | 0      | 0     |
| BRA | Brazil | 7681 | Bela Vista            | 0.64 | 0.93 | 1.00 | 3854   | 0      | 0     |
| BRA | Brazil | 7682 | Bodoquena             | 0.67 | 0.94 | 1.00 | 1076   | 0      | 0     |
| BRA | Brazil | 7683 | Bonito                | 0.21 | 0.66 | 0.75 | 12886  | 3147   | 1017  |
| BRA | Brazil | 7684 | Brasilandia           | 0.45 | 0.91 | 1.00 | 4196   | 0      | 0     |
| BRA | Brazil | 7685 | Caarapo               | 0.50 | 0.91 | 1.00 | 8768   | 0      | 0     |
| BRA | Brazil | 7686 | Camapua               | 0.45 | 0.91 | 1.00 | 6281   | 0      | 0     |
| BRA | Brazil | 7687 | Campo Grande          | 0.21 | 0.66 | 0.75 | 523800 | 127937 | 41359 |
| BRA | Brazil | 7688 | Caracol               | 0.56 | 0.95 | 1.00 | 1444   | 0      | 0     |
| BRA | Brazil | 7689 | Cassilandia           | 0.52 | 0.91 | 0.99 | 5971   | 0      | 0     |
| BRA | Brazil | 7690 | Chapadao Do Sul       | 0.46 | 0.89 | 0.99 | 8977   | 0      | 0     |
| BRA | Brazil | 7691 | Corguinho             | 0.48 | 0.85 | 0.94 | 1996   | 0      | 0     |
| BRA | Brazil | 7692 | Coronel Sapucaia      | 0.53 | 0.93 | 1.00 | 3832   | 0      | 0     |
| BRA | Brazil | 7693 | Corumba               | 0.45 | 0.92 | 1.00 | 38323  | 0      | 0     |
| BRA | Brazil | 7694 | Costa Rica            | 0.50 | 0.93 | 1.00 | 6601   | 0      | 0     |
| BRA | Brazil | 7695 | Coxim                 | 0.55 | 0.93 | 1.00 | 8257   | 0      | 0     |
| BRA | Brazil | 7696 | Deodapolis            | 0.47 | 0.92 | 1.00 | 4291   | 0      | 0     |
| BRA | Brazil | 7697 | Dois Irmaos Do Buriti | 0.52 | 0.90 | 0.99 | 3217   | 0      | 0     |
| BRA | Brazil | 7698 | Douradina             | 0.85 | 0.98 | 1.00 | 0      | 0      | 0     |
| BRA | Brazil | 7699 | Dourados              | 0.48 | 0.90 | 1.00 | 69787  | 0      | 0     |
| BRA | Brazil | 7700 | Eldorado              | 0.55 | 0.92 | 1.00 | 3122   | 0      | 0     |

|     |        |      |                          |      |      |      |       |      |      |
|-----|--------|------|--------------------------|------|------|------|-------|------|------|
| BRA | Brazil | 7701 | Fatima Do Sul            | 0.44 | 0.89 | 1.00 | 7016  | 0    | 0    |
| BRA | Brazil | 7702 | Gloria De Dourados       | 0.48 | 0.87 | 0.97 | 3235  | 0    | 0    |
| BRA | Brazil | 7703 | Guia Lopes Da Laguna     | 0.64 | 0.93 | 1.00 | 1720  | 0    | 0    |
| BRA | Brazil | 7704 | Iguatemi                 | 0.47 | 0.92 | 1.00 | 5331  | 0    | 0    |
| BRA | Brazil | 7705 | Inocencia                | 0.58 | 0.91 | 0.98 | 1759  | 0    | 0    |
| BRA | Brazil | 7706 | Itapora                  | 0.42 | 0.87 | 0.99 | 9158  | 0    | 0    |
| BRA | Brazil | 7707 | Itaquirai                | 0.45 | 0.86 | 0.98 | 7250  | 0    | 0    |
| BRA | Brazil | 7708 | Ivinhema                 | 0.53 | 0.90 | 0.99 | 6376  | 0    | 0    |
| BRA | Brazil | 7709 | Japora                   | 0.44 | 0.89 | 0.99 | 3298  | 0    | 0    |
| BRA | Brazil | 7710 | Jaraguari                | 0.46 | 0.83 | 0.94 | 2396  | 0    | 0    |
| BRA | Brazil | 7711 | Jardim                   | 0.21 | 0.66 | 0.75 | 15326 | 3743 | 1210 |
| BRA | Brazil | 7712 | Jatei                    | 0.55 | 0.94 | 1.00 | 1036  | 0    | 0    |
| BRA | Brazil | 7713 | Juti                     | 0.63 | 0.92 | 1.00 | 1146  | 0    | 0    |
| BRA | Brazil | 7714 | Ladario                  | 0.39 | 0.87 | 1.00 | 10225 | 0    | 0    |
| BRA | Brazil | 7715 | Laguna Carapa            | 0.52 | 0.92 | 1.00 | 1985  | 0    | 0    |
| BRA | Brazil | 7716 | Maracaju                 | 0.63 | 0.90 | 0.98 | 7798  | 0    | 0    |
| BRA | Brazil | 7717 | Miranda                  | 0.58 | 0.92 | 0.99 | 6239  | 0    | 0    |
| BRA | Brazil | 7718 | Mundo Novo               | 0.21 | 0.66 | 0.75 | 10807 | 2640 | 853  |
| BRA | Brazil | 7719 | Navirai                  | 0.50 | 0.89 | 0.99 | 16337 | 0    | 0    |
| BRA | Brazil | 7720 | Nioaque                  | 0.58 | 0.92 | 1.00 | 3179  | 0    | 0    |
| BRA | Brazil | 7721 | Nova Alvorada Do Sul     | 0.46 | 0.90 | 1.00 | 7496  | 0    | 0    |
| BRA | Brazil | 7722 | Nova Andradina           | 0.57 | 0.90 | 0.99 | 12161 | 0    | 0    |
| BRA | Brazil | 7723 | Novo Horizonte Do Sul    | 0.64 | 0.94 | 1.00 | 709   | 0    | 0    |
| BRA | Brazil | 7724 | Paranaiba                | 0.61 | 0.90 | 0.98 | 8065  | 0    | 0    |
| BRA | Brazil | 7725 | Paranhos                 | 0.42 | 0.91 | 1.00 | 5164  | 0    | 0    |
| BRA | Brazil | 7726 | Pedro Gomes              | 0.64 | 0.94 | 1.00 | 1259  | 0    | 0    |
| BRA | Brazil | 7727 | Ponta Pora               | 0.54 | 0.91 | 1.00 | 22689 | 0    | 0    |
| BRA | Brazil | 7728 | Porto Murtinho           | 0.40 | 0.89 | 1.00 | 6726  | 0    | 0    |
| BRA | Brazil | 7729 | Ribas Do Rio Pardo       | 0.49 | 0.88 | 0.98 | 7801  | 0    | 0    |
| BRA | Brazil | 7730 | Rio Brilhante            | 0.47 | 0.91 | 1.00 | 12292 | 0    | 0    |
| BRA | Brazil | 7731 | Rio Negro                | 1.00 | 1.00 | 1.00 | 0     | 0    | 0    |
| BRA | Brazil | 7732 | Rio Verde De Mato Grosso | 0.43 | 0.90 | 1.00 | 7808  | 0    | 0    |
| BRA | Brazil | 7733 | Rochedo                  | 0.65 | 0.93 | 0.98 | 727   | 0    | 0    |

|     |        |      |                       |      |      |      |       |   |   |
|-----|--------|------|-----------------------|------|------|------|-------|---|---|
| BRA | Brazil | 7734 | Santa Rita Do Pardo   | 0.54 | 0.88 | 0.96 | 2123  | 0 | 0 |
| BRA | Brazil | 7735 | Sao Gabriel Do Oeste  | 0.48 | 0.91 | 0.99 | 8477  | 0 | 0 |
| BRA | Brazil | 7736 | Selviria              | 0.74 | 0.94 | 0.99 | 419   | 0 | 0 |
| BRA | Brazil | 7737 | Sete Quedas           | 0.50 | 0.92 | 1.00 | 3236  | 0 | 0 |
| BRA | Brazil | 7738 | Sidrolandia           | 0.38 | 0.86 | 0.98 | 24300 | 0 | 0 |
| BRA | Brazil | 7739 | Sonora                | 0.61 | 0.95 | 1.00 | 3631  | 0 | 0 |
| BRA | Brazil | 7740 | Tacuru                | 0.46 | 0.91 | 1.00 | 3882  | 0 | 0 |
| BRA | Brazil | 7741 | Taquarussu            | 0.54 | 0.91 | 0.99 | 974   | 0 | 0 |
| BRA | Brazil | 7742 | Terenos               | 0.35 | 0.82 | 0.95 | 9513  | 0 | 0 |
| BRA | Brazil | 7743 | Tres Lagoas           | 0.57 | 0.91 | 0.99 | 27602 | 0 | 0 |
| BRA | Brazil | 7744 | Vicentina             | 0.55 | 0.91 | 0.99 | 1540  | 0 | 0 |
| BRA | Brazil | 7745 | Acorizal              | 0.50 | 0.92 | 1.00 | 1637  | 0 | 0 |
| BRA | Brazil | 7746 | Agua Boa              | 0.40 | 0.90 | 1.00 | 11660 | 0 | 0 |
| BRA | Brazil | 7747 | Alta Floresta         | 0.49 | 0.93 | 1.00 | 16188 | 0 | 0 |
| BRA | Brazil | 7748 | Alto Araguaia         | 0.53 | 0.88 | 0.96 | 5024  | 0 | 0 |
| BRA | Brazil | 7749 | Alto Boa Vista        | 0.40 | 0.87 | 0.99 | 5961  | 0 | 0 |
| BRA | Brazil | 7750 | Alto Garcas           | 0.55 | 0.89 | 0.98 | 3011  | 0 | 0 |
| BRA | Brazil | 7751 | Alto Paraguai         | 0.34 | 0.83 | 0.95 | 5106  | 0 | 0 |
| BRA | Brazil | 7752 | Alto Taquari          | 0.47 | 0.90 | 0.99 | 3743  | 0 | 0 |
| BRA | Brazil | 7753 | Apiacas               | 0.40 | 0.90 | 1.00 | 4048  | 0 | 0 |
| BRA | Brazil | 7754 | Araguaiana            | 0.55 | 0.89 | 0.96 | 801   | 0 | 0 |
| BRA | Brazil | 7755 | Araguainha            | 0.99 | 0.99 | 1.00 | 0     | 0 | 0 |
| BRA | Brazil | 7756 | Araputanga            | 0.40 | 0.90 | 1.00 | 6723  | 0 | 0 |
| BRA | Brazil | 7757 | Arenapolis            | 0.38 | 0.85 | 0.98 | 4599  | 0 | 0 |
| BRA | Brazil | 7758 | Aripuana              | 0.37 | 0.90 | 1.00 | 28416 | 0 | 0 |
| BRA | Brazil | 7759 | Barao De Melgaco      | 0.33 | 0.83 | 0.96 | 3412  | 0 | 0 |
| BRA | Brazil | 7760 | Barra Do Bugres       | 0.41 | 0.90 | 1.00 | 13377 | 0 | 0 |
| BRA | Brazil | 7761 | Barra Do Garcas       | 0.56 | 0.90 | 0.99 | 14427 | 0 | 0 |
| BRA | Brazil | 7762 | Brasnorte             | 0.37 | 0.85 | 0.99 | 8426  | 0 | 0 |
| BRA | Brazil | 7763 | Caceres               | 0.40 | 0.91 | 1.00 | 39031 | 0 | 0 |
| BRA | Brazil | 7764 | Campinapolis          | 0.67 | 0.94 | 1.00 | 2054  | 0 | 0 |
| BRA | Brazil | 7765 | Campo Novo Do Parecis | 0.39 | 0.91 | 1.00 | 14516 | 0 | 0 |
| BRA | Brazil | 7766 | Campo Verde           | 0.40 | 0.89 | 0.99 | 17508 | 0 | 0 |

|     |        |      |                       |      |      |      |        |      |     |
|-----|--------|------|-----------------------|------|------|------|--------|------|-----|
| BRA | Brazil | 7767 | Campos De Julio       | 0.52 | 0.95 | 1.00 | 1926   | 0    | 0   |
| BRA | Brazil | 7768 | Cana Brava Do Norte   | 0.54 | 0.92 | 1.00 | 1237   | 0    | 0   |
| BRA | Brazil | 7769 | Canarana              | 0.21 | 0.66 | 0.75 | 12613  | 3081 | 996 |
| BRA | Brazil | 7770 | Carlinda              | 0.41 | 0.90 | 0.99 | 4157   | 0    | 0   |
| BRA | Brazil | 7771 | Castanheira           | 0.43 | 0.88 | 0.99 | 3151   | 0    | 0   |
| BRA | Brazil | 7772 | Chapada Dos Guimaraes | 0.48 | 0.90 | 1.00 | 5840   | 0    | 0   |
| BRA | Brazil | 7773 | Claudia               | 0.47 | 0.88 | 0.98 | 4436   | 0    | 0   |
| BRA | Brazil | 7774 | Cocalinho             | 0.55 | 0.88 | 0.98 | 1790   | 0    | 0   |
| BRA | Brazil | 7775 | Colider               | 0.39 | 0.89 | 1.00 | 13621  | 0    | 0   |
| BRA | Brazil | 7776 | Comodoro              | 0.48 | 0.93 | 1.00 | 6801   | 0    | 0   |
| BRA | Brazil | 7777 | Confresa              | 0.42 | 0.87 | 0.99 | 11626  | 0    | 0   |
| BRA | Brazil | 7778 | Cotriguacu            | 0.36 | 0.87 | 0.98 | 8943   | 0    | 0   |
| BRA | Brazil | 7779 | Cuiaba                | 0.39 | 0.89 | 1.00 | 249226 | 0    | 0   |
| BRA | Brazil | 7780 | Denise                | 0.40 | 0.88 | 0.99 | 3773   | 0    | 0   |
| BRA | Brazil | 7781 | Diamantino            | 0.46 | 0.94 | 1.00 | 7532   | 0    | 0   |
| BRA | Brazil | 7782 | Dom Aquino            | 0.43 | 0.85 | 0.97 | 3130   | 0    | 0   |
| BRA | Brazil | 7783 | Feliz Natal           | 0.38 | 0.90 | 0.99 | 6057   | 0    | 0   |
| BRA | Brazil | 7784 | Figueiropolis D'oeste | 0.47 | 0.88 | 0.98 | 1218   | 0    | 0   |
| BRA | Brazil | 7785 | Gaucha Do Norte       | 0.37 | 0.89 | 1.00 | 3233   | 0    | 0   |
| BRA | Brazil | 7786 | General Carneiro      | 0.98 | 1.00 | 1.00 | 0      | 0    | 0   |
| BRA | Brazil | 7787 | Gloria D'oeste        | 0.50 | 0.85 | 0.95 | 1020   | 0    | 0   |
| BRA | Brazil | 7788 | Guaranta Do Norte     | 0.47 | 0.92 | 1.00 | 10967  | 0    | 0   |
| BRA | Brazil | 7789 | Guiratinga            | 0.45 | 0.86 | 0.95 | 5321   | 0    | 0   |
| BRA | Brazil | 7790 | Indiavai              | 0.47 | 0.90 | 0.99 | 893    | 0    | 0   |
| BRA | Brazil | 7791 | Itauba                | 0.62 | 0.95 | 1.00 | 1375   | 0    | 0   |
| BRA | Brazil | 7792 | Itiquira              | 0.52 | 0.90 | 0.99 | 3669   | 0    | 0   |
| BRA | Brazil | 7793 | Jaciara               | 0.49 | 0.91 | 1.00 | 8469   | 0    | 0   |
| BRA | Brazil | 7794 | Jangada               | 0.49 | 0.92 | 0.99 | 2594   | 0    | 0   |
| BRA | Brazil | 7795 | Jauru                 | 0.46 | 0.91 | 1.00 | 3255   | 0    | 0   |
| BRA | Brazil | 7796 | Juara                 | 0.53 | 0.93 | 1.00 | 9509   | 0    | 0   |
| BRA | Brazil | 7797 | Juina                 | 0.44 | 0.90 | 1.00 | 14926  | 0    | 0   |
| BRA | Brazil | 7798 | Juruena               | 0.32 | 0.85 | 0.97 | 8131   | 0    | 0   |
| BRA | Brazil | 7799 | Juscimeira            | 0.44 | 0.87 | 0.99 | 4137   | 0    | 0   |



|     |        |      |                             |      |      |      |       |   |   |
|-----|--------|------|-----------------------------|------|------|------|-------|---|---|
| BRA | Brazil | 7800 | Lambari D'oeste             | 0.50 | 0.91 | 0.99 | 1887  | 0 | 0 |
| BRA | Brazil | 7801 | Lucas Do Rio Verde          | 0.36 | 0.86 | 0.98 | 31855 | 0 | 0 |
| BRA | Brazil | 7802 | Luciara                     | 0.64 | 0.93 | 1.00 | 369   | 0 | 0 |
| BRA | Brazil | 7803 | Marcelandia                 | 0.53 | 0.93 | 1.00 | 3198  | 0 | 0 |
| BRA | Brazil | 7804 | Matupa                      | 0.37 | 0.88 | 0.99 | 7831  | 0 | 0 |
| BRA | Brazil | 7805 | Mirassol D'oeste            | 0.38 | 0.88 | 1.00 | 12873 | 0 | 0 |
| BRA | Brazil | 7806 | Nobres                      | 0.43 | 0.91 | 1.00 | 7012  | 0 | 0 |
| BRA | Brazil | 7807 | Nortelandia                 | 0.46 | 0.90 | 1.00 | 1816  | 0 | 0 |
| BRA | Brazil | 7808 | Nossa Senhora Do Livramento | 0.43 | 0.88 | 1.00 | 4612  | 0 | 0 |
| BRA | Brazil | 7809 | Nova Bandeirantes           | 0.36 | 0.87 | 0.99 | 6799  | 0 | 0 |
| BRA | Brazil | 7810 | Nova Brasilandia            | 0.58 | 0.93 | 1.00 | 939   | 0 | 0 |
| BRA | Brazil | 7811 | Nova Canaa Do Norte         | 0.41 | 0.91 | 0.99 | 4960  | 0 | 0 |
| BRA | Brazil | 7812 | Nova Guarita                | 0.48 | 0.91 | 0.99 | 1492  | 0 | 0 |
| BRA | Brazil | 7813 | Nova Lacerda                | 0.43 | 0.91 | 1.00 | 2380  | 0 | 0 |
| BRA | Brazil | 7814 | Nova Marilandia             | 0.35 | 0.88 | 0.98 | 1514  | 0 | 0 |
| BRA | Brazil | 7815 | Nova Maringa                | 0.36 | 0.87 | 0.99 | 3893  | 0 | 0 |
| BRA | Brazil | 7816 | Nova Monte Verde            | 0.39 | 0.92 | 0.99 | 3748  | 0 | 0 |
| BRA | Brazil | 7817 | Nova Mutum                  | 0.37 | 0.89 | 0.98 | 21358 | 0 | 0 |
| BRA | Brazil | 7818 | Nova Olimpia                | 0.46 | 0.93 | 1.00 | 6876  | 0 | 0 |
| BRA | Brazil | 7819 | Nova Ubirata                | 0.45 | 0.89 | 0.98 | 5048  | 0 | 0 |
| BRA | Brazil | 7820 | Nova Xavantina              | 0.61 | 0.88 | 0.97 | 4139  | 0 | 0 |
| BRA | Brazil | 7821 | Novo Horizonte Do Norte     | 0.39 | 0.85 | 0.96 | 1817  | 0 | 0 |
| BRA | Brazil | 7822 | Novo Mundo                  | 0.34 | 0.86 | 0.97 | 4165  | 0 | 0 |
| BRA | Brazil | 7823 | Novo Sao Joaquim            | 0.66 | 0.92 | 0.99 | 1403  | 0 | 0 |
| BRA | Brazil | 7824 | Paranaita                   | 0.49 | 0.96 | 1.00 | 3506  | 0 | 0 |
| BRA | Brazil | 7825 | Paranatinga                 | 0.43 | 0.92 | 1.00 | 8266  | 0 | 0 |
| BRA | Brazil | 7826 | Pedra Preta                 | 0.41 | 0.88 | 0.99 | 6788  | 0 | 0 |
| BRA | Brazil | 7827 | Peixoto De Azevedo          | 0.38 | 0.88 | 0.99 | 14343 | 0 | 0 |
| BRA | Brazil | 7828 | Planalto Da Serra           | 0.65 | 0.92 | 0.98 | 404   | 0 | 0 |
| BRA | Brazil | 7829 | Pocone                      | 0.42 | 0.90 | 1.00 | 12594 | 0 | 0 |
| BRA | Brazil | 7830 | Pontal Do Araguaia          | 0.57 | 0.87 | 0.95 | 1802  | 0 | 0 |
| BRA | Brazil | 7831 | Ponte Branca                | 0.83 | 0.96 | 1.00 | 0     | 0 | 0 |
| BRA | Brazil | 7832 | Pontes E Lacerda            | 0.43 | 0.91 | 1.00 | 18578 | 0 | 0 |

|     |        |      |                            |      |      |      |       |     |     |
|-----|--------|------|----------------------------|------|------|------|-------|-----|-----|
| BRA | Brazil | 7833 | Porto Alegre Do Norte      | 0.44 | 0.88 | 1.00 | 4368  | 0   | 0   |
| BRA | Brazil | 7834 | Porto Dos Gauchos          | 0.50 | 0.92 | 1.00 | 1505  | 0   | 0   |
| BRA | Brazil | 7835 | Porto Esperidiao           | 0.54 | 0.94 | 1.00 | 2995  | 0   | 0   |
| BRA | Brazil | 7836 | Porto Estrela              | 0.49 | 0.94 | 1.00 | 1026  | 0   | 0   |
| BRA | Brazil | 7837 | Poxoreo                    | 0.40 | 0.84 | 0.97 | 7749  | 0   | 0   |
| BRA | Brazil | 7838 | Primavera Do Leste         | 0.45 | 0.90 | 1.00 | 20530 | 0   | 0   |
| BRA | Brazil | 7839 | Querencia                  | 0.39 | 0.87 | 0.99 | 7335  | 0   | 0   |
| BRA | Brazil | 7840 | Reserva Do Cabacal         | 0.45 | 0.90 | 1.00 | 843   | 0   | 0   |
| BRA | Brazil | 7841 | Ribeirao Cascalheira       | 0.42 | 0.86 | 0.99 | 4270  | 0   | 0   |
| BRA | Brazil | 7842 | Ribeiraozinho              | 0.67 | 0.92 | 0.98 | 308   | 0   | 0   |
| BRA | Brazil | 7843 | Rio Branco                 | 0.21 | 0.66 | 0.75 | 3081  | 752 | 243 |
| BRA | Brazil | 7844 | Rondonopolis               | 0.39 | 0.87 | 0.99 | 94234 | 0   | 0   |
| BRA | Brazil | 7845 | Rosario Oeste              | 0.37 | 0.88 | 0.99 | 7857  | 0   | 0   |
| BRA | Brazil | 7846 | Salto Do Ceu               | 0.50 | 0.91 | 1.00 | 1076  | 0   | 0   |
| BRA | Brazil | 7847 | Santa Carmem               | 0.51 | 0.93 | 1.00 | 1292  | 0   | 0   |
| BRA | Brazil | 7848 | Santa Terezinha            | 0.45 | 0.86 | 0.98 | 2901  | 0   | 0   |
| BRA | Brazil | 7849 | Santo Afonso               | 0.40 | 0.87 | 1.00 | 1222  | 0   | 0   |
| BRA | Brazil | 7850 | Santo Antonio Do Leverger  | 0.39 | 0.84 | 0.97 | 7897  | 0   | 0   |
| BRA | Brazil | 7851 | Sao Felix Do Araguaia      | 0.40 | 0.86 | 0.99 | 5260  | 0   | 0   |
| BRA | Brazil | 7852 | Sao Jose Do Povo           | 0.35 | 0.83 | 0.95 | 1789  | 0   | 0   |
| BRA | Brazil | 7853 | Sao Jose Do Rio Claro      | 0.42 | 0.91 | 1.00 | 7785  | 0   | 0   |
| BRA | Brazil | 7854 | Sao Jose Do Xingu          | 0.46 | 0.89 | 1.00 | 2763  | 0   | 0   |
| BRA | Brazil | 7855 | Sao Jose Dos Quatro Marcos | 0.43 | 0.89 | 0.99 | 7061  | 0   | 0   |
| BRA | Brazil | 7856 | Sao Pedro Da Cipa          | 0.54 | 0.92 | 1.00 | 1079  | 0   | 0   |
| BRA | Brazil | 7857 | Sapezal                    | 0.35 | 0.86 | 0.98 | 12556 | 0   | 0   |
| BRA | Brazil | 7858 | Sinop                      | 0.43 | 0.89 | 1.00 | 52600 | 0   | 0   |
| BRA | Brazil | 7859 | Sorriso                    | 0.38 | 0.88 | 0.99 | 38584 | 0   | 0   |
| BRA | Brazil | 7860 | Tabapora                   | 0.45 | 0.90 | 1.00 | 3478  | 0   | 0   |
| BRA | Brazil | 7861 | Tangara Da Serra           | 0.38 | 0.88 | 1.00 | 43557 | 0   | 0   |
| BRA | Brazil | 7862 | Tapurah                    | 0.34 | 0.83 | 0.95 | 13800 | 0   | 0   |
| BRA | Brazil | 7863 | Terra Nova Do Norte        | 0.52 | 0.93 | 1.00 | 2896  | 0   | 0   |
| BRA | Brazil | 7864 | Tesouro                    | 0.37 | 0.82 | 0.93 | 1709  | 0   | 0   |
| BRA | Brazil | 7865 | Torixoreu                  | 0.57 | 0.90 | 0.98 | 904   | 0   | 0   |

|     |        |      |                                  |      |      |      |        |      |      |
|-----|--------|------|----------------------------------|------|------|------|--------|------|------|
| BRA | Brazil | 7866 | Uniao Do Sul                     | 0.65 | 0.95 | 1.00 | 558    | 0    | 0    |
| BRA | Brazil | 7867 | Varzea Grande                    | 0.39 | 0.88 | 1.00 | 117904 | 0    | 0    |
| BRA | Brazil | 7868 | Vera                             | 0.48 | 0.89 | 0.99 | 3626   | 0    | 0    |
| BRA | Brazil | 7869 | Vila Bela Da Santissima Trindade | 0.37 | 0.88 | 1.00 | 7065   | 0    | 0    |
| BRA | Brazil | 7870 | Vila Rica                        | 0.44 | 0.89 | 0.99 | 9413   | 0    | 0    |
| BRA | Brazil | 7871 | Abadia Dos Dourados              | 0.43 | 0.75 | 0.95 | 2602   | 347  | 0    |
| BRA | Brazil | 7872 | Abaete                           | 0.35 | 0.76 | 0.96 | 10675  | 946  | 0    |
| BRA | Brazil | 7873 | Abre Campo                       | 0.28 | 0.67 | 0.94 | 7191   | 1720 | 0    |
| BRA | Brazil | 7874 | Acaiaca                          | 0.31 | 0.71 | 0.97 | 1981   | 365  | 0    |
| BRA | Brazil | 7875 | Acucena                          | 0.33 | 0.81 | 1.00 | 4453   | 0    | 0    |
| BRA | Brazil | 7876 | Agua Boa                         | 0.17 | 0.49 | 0.65 | 9198   | 4494 | 2194 |
| BRA | Brazil | 7877 | Agua Comprida                    | 0.75 | 0.89 | 0.97 | 97     | 0    | 0    |
| BRA | Brazil | 7878 | Aguanil                          | 0.39 | 0.77 | 0.96 | 1825   | 145  | 0    |
| BRA | Brazil | 7879 | Aguas Formosas                   | 0.30 | 0.71 | 0.97 | 9652   | 1741 | 0    |
| BRA | Brazil | 7880 | Aguas Vermelhas                  | 0.32 | 0.69 | 0.92 | 6595   | 1478 | 0    |
| BRA | Brazil | 7881 | Aimores                          | 0.31 | 0.74 | 0.99 | 12549  | 1648 | 0    |
| BRA | Brazil | 7882 | Aiuruoca                         | 0.26 | 0.64 | 0.89 | 3371   | 972  | 0    |
| BRA | Brazil | 7883 | Alagoa                           | 0.62 | 0.84 | 0.97 | 476    | 0    | 0    |
| BRA | Brazil | 7884 | Albertina                        | 0.29 | 0.68 | 0.94 | 1568   | 360  | 0    |
| BRA | Brazil | 7885 | Alem Paraiba                     | 0.30 | 0.68 | 0.92 | 17938  | 4333 | 0    |
| BRA | Brazil | 7886 | Alfenas                          | 0.29 | 0.75 | 0.98 | 40567  | 3839 | 0    |
| BRA | Brazil | 7887 | Alfredo Vasconcelos              | 0.50 | 0.77 | 0.97 | 1922   | 176  | 0    |
| BRA | Brazil | 7888 | Almenara                         | 0.31 | 0.68 | 0.89 | 20731  | 5197 | 0    |
| BRA | Brazil | 7889 | Alpercata                        | 0.31 | 0.71 | 0.97 | 3630   | 687  | 0    |
| BRA | Brazil | 7890 | Alpinopolis                      | 0.31 | 0.72 | 0.98 | 9782   | 1552 | 0    |
| BRA | Brazil | 7891 | Alterosa                         | 0.32 | 0.76 | 0.99 | 6994   | 607  | 0    |
| BRA | Brazil | 7892 | Alto Caparao                     | 0.42 | 0.80 | 0.99 | 2092   | 16   | 0    |
| BRA | Brazil | 7893 | Alto Jequitiba                   | 0.33 | 0.69 | 0.93 | 4024   | 946  | 0    |
| BRA | Brazil | 7894 | Alto Rio Doce                    | 0.35 | 0.70 | 0.95 | 5259   | 1183 | 0    |
| BRA | Brazil | 7895 | Alvarenga                        | 0.30 | 0.74 | 0.98 | 2271   | 254  | 0    |
| BRA | Brazil | 7896 | Alvinopolis                      | 0.29 | 0.67 | 0.91 | 7979   | 1984 | 0    |
| BRA | Brazil | 7897 | Alvorada De Minas                | 0.40 | 0.80 | 1.00 | 1479   | 0    | 0    |
| BRA | Brazil | 7898 | Amparo Do Serra                  | 0.32 | 0.75 | 0.98 | 2393   | 248  | 0    |

|     |        |      |                        |      |      |      |       |       |   |
|-----|--------|------|------------------------|------|------|------|-------|-------|---|
| BRA | Brazil | 7899 | Andradas               | 0.27 | 0.71 | 0.97 | 21477 | 3849  | 0 |
| BRA | Brazil | 7900 | Andrelandia            | 0.34 | 0.75 | 0.99 | 5792  | 623   | 0 |
| BRA | Brazil | 7901 | Angelandia             | 0.30 | 0.72 | 0.98 | 6058  | 1011  | 0 |
| BRA | Brazil | 7902 | Antonio Carlos         | 0.32 | 0.71 | 0.96 | 5377  | 1048  | 0 |
| BRA | Brazil | 7903 | Antonio Dias           | 0.27 | 0.66 | 0.92 | 6086  | 1573  | 0 |
| BRA | Brazil | 7904 | Antonio Prado De Minas | 0.28 | 0.70 | 0.96 | 846   | 158   | 0 |
| BRA | Brazil | 7905 | Aracai                 | 0.55 | 0.78 | 0.96 | 598   | 52    | 0 |
| BRA | Brazil | 7906 | Aracitaba              | 0.27 | 0.63 | 0.85 | 1124  | 358   | 0 |
| BRA | Brazil | 7907 | Aracuai                | 0.30 | 0.70 | 0.95 | 18730 | 3895  | 0 |
| BRA | Brazil | 7908 | Araguari               | 0.41 | 0.76 | 0.98 | 46006 | 4557  | 0 |
| BRA | Brazil | 7909 | Arantina               | 0.36 | 0.76 | 0.98 | 1258  | 121   | 0 |
| BRA | Brazil | 7910 | Araponga               | 0.51 | 0.81 | 0.99 | 2456  | 0     | 0 |
| BRA | Brazil | 7911 | Arapora                | 0.54 | 0.83 | 0.96 | 2197  | 0     | 0 |
| BRA | Brazil | 7912 | Arapua                 | 0.90 | 0.98 | 1.00 | 0     | 0     | 0 |
| BRA | Brazil | 7913 | Araujos                | 0.34 | 0.75 | 0.97 | 4210  | 420   | 0 |
| BRA | Brazil | 7914 | Araxa                  | 0.33 | 0.74 | 0.98 | 49648 | 6310  | 0 |
| BRA | Brazil | 7915 | Arceburgo              | 0.34 | 0.78 | 0.98 | 4870  | 224   | 0 |
| BRA | Brazil | 7916 | Arcos                  | 0.31 | 0.72 | 0.96 | 19567 | 3078  | 0 |
| BRA | Brazil | 7917 | Areado                 | 0.34 | 0.75 | 0.98 | 6926  | 790   | 0 |
| BRA | Brazil | 7918 | Argirita               | 0.34 | 0.74 | 0.97 | 1334  | 184   | 0 |
| BRA | Brazil | 7919 | Aricanduva             | 0.54 | 0.80 | 1.00 | 1267  | 0     | 0 |
| BRA | Brazil | 7920 | Arinos                 | 0.79 | 0.90 | 0.98 | 134   | 0     | 0 |
| BRA | Brazil | 7921 | Astolfo Dutra          | 0.45 | 0.81 | 0.98 | 4921  | 0     | 0 |
| BRA | Brazil | 7922 | Ataleia                | 0.28 | 0.70 | 0.96 | 7197  | 1421  | 0 |
| BRA | Brazil | 7923 | Augusto De Lima        | 0.52 | 0.81 | 0.98 | 1389  | 0     | 0 |
| BRA | Brazil | 7924 | Baependi               | 0.34 | 0.76 | 0.97 | 9042  | 774   | 0 |
| BRA | Brazil | 7925 | Baldim                 | 0.36 | 0.75 | 0.98 | 3587  | 383   | 0 |
| BRA | Brazil | 7926 | Bambui                 | 0.28 | 0.70 | 0.96 | 12442 | 2358  | 0 |
| BRA | Brazil | 7927 | Bandeira               | 0.30 | 0.69 | 0.94 | 2508  | 564   | 0 |
| BRA | Brazil | 7928 | Bandeira Do Sul        | 0.31 | 0.72 | 0.95 | 2818  | 488   | 0 |
| BRA | Brazil | 7929 | Barao De Cocais        | 0.36 | 0.79 | 1.00 | 14054 | 197   | 0 |
| BRA | Brazil | 7930 | Barao De Monte Alto    | 0.52 | 0.84 | 0.98 | 1586  | 0     | 0 |
| BRA | Brazil | 7931 | Barbacena              | 0.29 | 0.69 | 0.95 | 70879 | 14644 | 0 |

|     |        |      |                       |      |      |      |         |        |      |
|-----|--------|------|-----------------------|------|------|------|---------|--------|------|
| BRA | Brazil | 7932 | Barra Longa           | 0.27 | 0.64 | 0.85 | 3075    | 945    | 0    |
| BRA | Brazil | 7933 | Barroso               | 0.30 | 0.71 | 0.96 | 10406   | 1902   | 0    |
| BRA | Brazil | 7934 | Bela Vista De Minas   | 0.31 | 0.73 | 0.98 | 5211    | 795    | 0    |
| BRA | Brazil | 7935 | Belmiro Braga         | 0.32 | 0.75 | 0.98 | 1802    | 193    | 0    |
| BRA | Brazil | 7936 | Belo Horizonte        | 0.30 | 0.72 | 0.95 | 1273264 | 206960 | 0    |
| BRA | Brazil | 7937 | Belo Oriente          | 0.32 | 0.77 | 1.00 | 12972   | 831    | 0    |
| BRA | Brazil | 7938 | Belo Vale             | 0.28 | 0.65 | 0.88 | 4223    | 1194   | 0    |
| BRA | Brazil | 7939 | Berilo                | 0.31 | 0.74 | 0.97 | 5934    | 757    | 0    |
| BRA | Brazil | 7940 | Berizal               | 0.33 | 0.73 | 0.98 | 2244    | 331    | 0    |
| BRA | Brazil | 7941 | Bertopolis            | 0.35 | 0.82 | 1.00 | 1724    | 0      | 0    |
| BRA | Brazil | 7942 | Betim                 | 0.30 | 0.75 | 0.99 | 220049  | 21520  | 0    |
| BRA | Brazil | 7943 | Bias Fortes           | 0.30 | 0.69 | 0.93 | 1798    | 402    | 0    |
| BRA | Brazil | 7944 | Bicas                 | 0.29 | 0.68 | 0.92 | 7132    | 1714   | 0    |
| BRA | Brazil | 7945 | Biquinhas             | 0.49 | 0.79 | 0.95 | 796     | 26     | 0    |
| BRA | Brazil | 7946 | Boa Esperanca         | 0.17 | 0.49 | 0.65 | 25466   | 12444  | 6076 |
| BRA | Brazil | 7947 | Bocaina De Minas      | 0.23 | 0.59 | 0.80 | 3248    | 1183   | 19   |
| BRA | Brazil | 7948 | Bocaiuva              | 0.38 | 0.77 | 1.00 | 21082   | 1463   | 0    |
| BRA | Brazil | 7949 | Bom Despacho          | 0.33 | 0.78 | 0.98 | 23806   | 818    | 0    |
| BRA | Brazil | 7950 | Bom Jardim De Minas   | 0.56 | 0.84 | 1.00 | 1568    | 0      | 0    |
| BRA | Brazil | 7951 | Bom Jesus Da Penha    | 0.42 | 0.80 | 0.98 | 1605    | 7      | 0    |
| BRA | Brazil | 7952 | Bom Jesus Do Amparo   | 0.32 | 0.72 | 0.96 | 2901    | 487    | 0    |
| BRA | Brazil | 7953 | Bom Jesus Do Galho    | 0.29 | 0.69 | 0.94 | 8004    | 1721   | 0    |
| BRA | Brazil | 7954 | Bom Repouso           | 0.56 | 0.79 | 0.98 | 2598    | 128    | 0    |
| BRA | Brazil | 7955 | Bom Sucesso           | 0.34 | 0.73 | 0.98 | 8305    | 1224   | 0    |
| BRA | Brazil | 7956 | Bonfim                | 0.64 | 0.97 | 1.00 | 1110    | 0      | 0    |
| BRA | Brazil | 7957 | Bonfinopolis De Minas | 0.83 | 0.90 | 0.96 | 0       | 0      | 0    |
| BRA | Brazil | 7958 | Bonito De Minas       | 0.38 | 0.78 | 1.00 | 4663    | 179    | 0    |
| BRA | Brazil | 7959 | Borda Da Mata         | 0.35 | 0.69 | 0.94 | 8571    | 2157   | 0    |
| BRA | Brazil | 7960 | Botelhos              | 0.39 | 0.78 | 0.98 | 6313    | 329    | 0    |
| BRA | Brazil | 7961 | Botumirim             | 0.36 | 0.80 | 1.00 | 2815    | 0      | 0    |
| BRA | Brazil | 7962 | Bras Pires            | 0.48 | 0.80 | 0.96 | 1465    | 0      | 0    |
| BRA | Brazil | 7963 | Brasilandia De Minas  | 0.30 | 0.72 | 0.98 | 8132    | 1311   | 0    |
| BRA | Brazil | 7964 | Brasilia De Minas     | 0.40 | 0.78 | 1.00 | 12987   | 697    | 0    |

|     |        |      |                    |      |      |      |       |      |      |
|-----|--------|------|--------------------|------|------|------|-------|------|------|
| BRA | Brazil | 7965 | Brasopolis         | 0.31 | 0.77 | 0.98 | 7202  | 499  | 0    |
| BRA | Brazil | 7966 | Braunas            | 0.30 | 0.70 | 0.94 | 2486  | 503  | 0    |
| BRA | Brazil | 7967 | Brumadinho         | 0.29 | 0.75 | 0.98 | 20448 | 2006 | 0    |
| BRA | Brazil | 7968 | Bueno Brandao      | 0.30 | 0.71 | 0.96 | 5625  | 1009 | 0    |
| BRA | Brazil | 7969 | Buenopolis         | 0.51 | 0.80 | 0.97 | 3088  | 0    | 0    |
| BRA | Brazil | 7970 | Bugre              | 0.30 | 0.71 | 0.97 | 2278  | 397  | 0    |
| BRA | Brazil | 7971 | Buritis            | 0.81 | 0.97 | 1.00 | 0     | 0    | 0    |
| BRA | Brazil | 7972 | Buritizeiro        | 0.41 | 0.75 | 0.99 | 11578 | 1596 | 0    |
| BRA | Brazil | 7973 | Cabeceira Grande   | 0.80 | 0.91 | 0.99 | 13    | 0    | 0    |
| BRA | Brazil | 7974 | Cabo Verde         | 0.31 | 0.70 | 0.94 | 6969  | 1448 | 0    |
| BRA | Brazil | 7975 | Cachoeira Da Prata | 0.39 | 0.78 | 0.96 | 1544  | 71   | 0    |
| BRA | Brazil | 7976 | Cachoeira De Minas | 0.34 | 0.73 | 0.97 | 5410  | 810  | 0    |
| BRA | Brazil | 7977 | Cachoeira De Pajeu | 0.44 | 0.77 | 0.98 | 3320  | 282  | 0    |
| BRA | Brazil | 7978 | Cachoeira Dourada  | 0.17 | 0.49 | 0.65 | 1734  | 847  | 414  |
| BRA | Brazil | 7979 | Caetanopolis       | 0.29 | 0.73 | 0.95 | 5992  | 851  | 0    |
| BRA | Brazil | 7980 | Caete              | 0.28 | 0.71 | 0.97 | 23007 | 3921 | 0    |
| BRA | Brazil | 7981 | Caiana             | 0.27 | 0.62 | 0.82 | 2999  | 1005 | 0    |
| BRA | Brazil | 7982 | Cajuri             | 0.32 | 0.76 | 0.97 | 2066  | 153  | 0    |
| BRA | Brazil | 7983 | Caldas             | 0.34 | 0.73 | 0.96 | 6697  | 1095 | 0    |
| BRA | Brazil | 7984 | Camacho            | 0.52 | 0.81 | 0.96 | 843   | 0    | 0    |
| BRA | Brazil | 7985 | Camanducaia        | 0.32 | 0.72 | 0.97 | 10595 | 1805 | 0    |
| BRA | Brazil | 7986 | Cambui             | 0.27 | 0.72 | 0.97 | 15522 | 2431 | 0    |
| BRA | Brazil | 7987 | Cambuquira         | 0.29 | 0.67 | 0.91 | 6750  | 1760 | 0    |
| BRA | Brazil | 7988 | Campanario         | 0.34 | 0.75 | 0.99 | 1717  | 192  | 0    |
| BRA | Brazil | 7989 | Campanha           | 0.29 | 0.67 | 0.91 | 8599  | 2203 | 0    |
| BRA | Brazil | 7990 | Campestre          | 0.17 | 0.49 | 0.65 | 13472 | 6583 | 3214 |
| BRA | Brazil | 7991 | Campina Verde      | 0.36 | 0.73 | 0.95 | 8883  | 1372 | 0    |
| BRA | Brazil | 7992 | Campo Azul         | 0.52 | 0.84 | 0.99 | 1082  | 0    | 0    |
| BRA | Brazil | 7993 | Campo Belo         | 0.32 | 0.73 | 0.96 | 26381 | 3824 | 0    |
| BRA | Brazil | 7994 | Campo Do Meio      | 0.34 | 0.80 | 0.99 | 5474  | 0    | 0    |
| BRA | Brazil | 7995 | Campo Florido      | 0.49 | 0.83 | 0.99 | 2459  | 0    | 0    |
| BRA | Brazil | 7996 | Campos Altos       | 0.32 | 0.76 | 0.98 | 7369  | 691  | 0    |
| BRA | Brazil | 7997 | Campos Gerais      | 0.49 | 0.81 | 0.98 | 9067  | 0    | 0    |

|     |        |      |                     |      |      |      |       |      |      |
|-----|--------|------|---------------------|------|------|------|-------|------|------|
| BRA | Brazil | 7998 | Cana Verde          | 0.37 | 0.72 | 0.96 | 2424  | 475  | 0    |
| BRA | Brazil | 7999 | Canaa               | 0.29 | 0.63 | 0.81 | 2386  | 799  | 0    |
| BRA | Brazil | 8000 | Canapolis           | 0.17 | 0.49 | 0.65 | 7655  | 3740 | 1826 |
| BRA | Brazil | 8001 | Candeias            | 0.17 | 0.49 | 0.65 | 9519  | 4651 | 2271 |
| BRA | Brazil | 8002 | Cantagalo           | 0.98 | 1.00 | 1.00 | 0     | 0    | 0    |
| BRA | Brazil | 8003 | Caparao             | 0.34 | 0.74 | 0.98 | 2717  | 370  | 0    |
| BRA | Brazil | 8004 | Capela Nova         | 0.54 | 0.77 | 0.95 | 1242  | 144  | 0    |
| BRA | Brazil | 8005 | Capelinha           | 0.34 | 0.75 | 0.99 | 17672 | 1834 | 0    |
| BRA | Brazil | 8006 | Capetinga           | 0.34 | 0.76 | 0.98 | 3300  | 274  | 0    |
| BRA | Brazil | 8007 | Capim Branco        | 0.33 | 0.73 | 0.96 | 4320  | 674  | 0    |
| BRA | Brazil | 8008 | Capinopolis         | 0.42 | 0.81 | 0.98 | 6108  | 0    | 0    |
| BRA | Brazil | 8009 | Capitao Andrade     | 0.32 | 0.74 | 0.99 | 2610  | 333  | 0    |
| BRA | Brazil | 8010 | Capitao Eneas       | 0.53 | 0.81 | 0.99 | 4195  | 0    | 0    |
| BRA | Brazil | 8011 | Capitolio           | 0.35 | 0.71 | 0.95 | 3879  | 781  | 0    |
| BRA | Brazil | 8012 | Caputira            | 0.40 | 0.72 | 0.97 | 3768  | 751  | 0    |
| BRA | Brazil | 8013 | Carai               | 0.29 | 0.71 | 0.98 | 12330 | 2237 | 0    |
| BRA | Brazil | 8014 | Caranaiba           | 0.46 | 0.74 | 0.95 | 1195  | 227  | 0    |
| BRA | Brazil | 8015 | Carandai            | 0.47 | 0.77 | 0.98 | 8250  | 691  | 0    |
| BRA | Brazil | 8016 | Carangola           | 0.28 | 0.69 | 0.97 | 17501 | 3568 | 0    |
| BRA | Brazil | 8017 | Caratinga           | 0.30 | 0.73 | 0.98 | 46402 | 6881 | 0    |
| BRA | Brazil | 8018 | Carbonita           | 0.58 | 0.85 | 0.99 | 2119  | 0    | 0    |
| BRA | Brazil | 8019 | Careacu             | 0.32 | 0.72 | 0.98 | 2739  | 427  | 0    |
| BRA | Brazil | 8020 | Carlos Chagas       | 0.29 | 0.74 | 0.97 | 9955  | 1075 | 0    |
| BRA | Brazil | 8021 | Carmesia            | 0.59 | 0.87 | 1.00 | 548   | 0    | 0    |
| BRA | Brazil | 8022 | Carmo Da Cachoeira  | 0.31 | 0.74 | 0.98 | 6042  | 802  | 0    |
| BRA | Brazil | 8023 | Carmo Da Mata       | 0.46 | 0.82 | 0.97 | 3896  | 0    | 0    |
| BRA | Brazil | 8024 | Carmo De Minas      | 0.27 | 0.64 | 0.84 | 8030  | 2504 | 0    |
| BRA | Brazil | 8025 | Carmo Do Cajuru     | 0.30 | 0.77 | 1.00 | 11047 | 724  | 0    |
| BRA | Brazil | 8026 | Carmo Do Paranaiba  | 0.43 | 0.82 | 0.98 | 11478 | 0    | 0    |
| BRA | Brazil | 8027 | Carmo Do Rio Claro  | 0.27 | 0.67 | 0.94 | 11424 | 2687 | 0    |
| BRA | Brazil | 8028 | Carmopolis De Minas | 0.29 | 0.71 | 0.96 | 9812  | 1637 | 0    |
| BRA | Brazil | 8029 | Carneirinho         | 0.52 | 0.85 | 0.98 | 2818  | 0    | 0    |
| BRA | Brazil | 8030 | Carrancas           | 0.28 | 0.63 | 0.83 | 2145  | 687  | 0    |

|     |        |      |                             |      |      |      |       |      |   |
|-----|--------|------|-----------------------------|------|------|------|-------|------|---|
| BRA | Brazil | 8031 | Carvalhopolis               | 0.32 | 0.74 | 0.98 | 1697  | 210  | 0 |
| BRA | Brazil | 8032 | Carvalhos                   | 0.45 | 0.77 | 0.96 | 1616  | 144  | 0 |
| BRA | Brazil | 8033 | Casa Grande                 | 0.29 | 0.69 | 0.93 | 1186  | 263  | 0 |
| BRA | Brazil | 8034 | Cascalho Rico               | 0.70 | 0.85 | 0.97 | 316   | 0    | 0 |
| BRA | Brazil | 8035 | Cassia                      | 0.31 | 0.71 | 0.97 | 8842  | 1671 | 0 |
| BRA | Brazil | 8036 | Cataguases                  | 0.27 | 0.71 | 0.97 | 39287 | 6647 | 0 |
| BRA | Brazil | 8037 | Catas Altas                 | 0.33 | 0.78 | 0.99 | 2534  | 111  | 0 |
| BRA | Brazil | 8038 | Catas Altas Da Noruega      | 0.41 | 0.74 | 0.97 | 1422  | 233  | 0 |
| BRA | Brazil | 8039 | Catuji                      | 0.32 | 0.70 | 0.94 | 3453  | 695  | 0 |
| BRA | Brazil | 8040 | Catuti                      | 0.49 | 0.84 | 0.99 | 1597  | 0    | 0 |
| BRA | Brazil | 8041 | Caxambu                     | 0.30 | 0.72 | 0.97 | 10961 | 1751 | 0 |
| BRA | Brazil | 8042 | Cedro Do Abaete             | 0.69 | 0.86 | 0.97 | 134   | 0    | 0 |
| BRA | Brazil | 8043 | Central De Minas            | 0.30 | 0.73 | 0.98 | 3560  | 481  | 0 |
| BRA | Brazil | 8044 | Centralina                  | 0.41 | 0.75 | 0.95 | 4089  | 508  | 0 |
| BRA | Brazil | 8045 | Chacara                     | 0.28 | 0.70 | 0.93 | 2880  | 543  | 0 |
| BRA | Brazil | 8046 | Chale                       | 0.33 | 0.73 | 0.99 | 2759  | 408  | 0 |
| BRA | Brazil | 8047 | Chapada Do Norte            | 0.35 | 0.76 | 0.98 | 7259  | 692  | 0 |
| BRA | Brazil | 8048 | Chapada Gaucha              | 0.79 | 0.92 | 1.00 | 67    | 0    | 0 |
| BRA | Brazil | 8049 | Chiador                     | 0.36 | 0.78 | 0.94 | 1893  | 78   | 0 |
| BRA | Brazil | 8050 | Cipotanea                   | 0.44 | 0.74 | 0.95 | 2413  | 396  | 0 |
| BRA | Brazil | 8051 | Claraval                    | 0.47 | 0.78 | 0.97 | 1267  | 95   | 0 |
| BRA | Brazil | 8052 | Claro Dos Pooeos            | 0.44 | 0.77 | 0.97 | 2785  | 204  | 0 |
| BRA | Brazil | 8053 | Claudio                     | 0.35 | 0.74 | 0.98 | 12801 | 1723 | 0 |
| BRA | Brazil | 8054 | Coimbra                     | 0.56 | 0.83 | 0.97 | 1799  | 0    | 0 |
| BRA | Brazil | 8055 | Coluna                      | 0.37 | 0.80 | 0.99 | 3961  | 0    | 0 |
| BRA | Brazil | 8056 | Comendador Gomes            | 0.50 | 0.82 | 0.98 | 939   | 0    | 0 |
| BRA | Brazil | 8057 | Comercinho                  | 0.39 | 0.80 | 0.98 | 3231  | 0    | 0 |
| BRA | Brazil | 8058 | Conceicao Da Aparecida      | 0.33 | 0.75 | 0.98 | 4858  | 557  | 0 |
| BRA | Brazil | 8059 | Conceicao Da Barra De Minas | 0.43 | 0.79 | 0.96 | 1482  | 52   | 0 |
| BRA | Brazil | 8060 | Conceicao Das Alagoas       | 0.40 | 0.79 | 0.99 | 10971 | 150  | 0 |
| BRA | Brazil | 8061 | Conceicao Das Pedras        | 0.40 | 0.78 | 0.97 | 1156  | 44   | 0 |
| BRA | Brazil | 8062 | Conceicao De Ipanema        | 0.31 | 0.71 | 0.99 | 2254  | 391  | 0 |
| BRA | Brazil | 8063 | Conceicao Do Mato Dentro    | 0.46 | 0.90 | 1.00 | 6228  | 0    | 0 |



|     |        |      |                             |      |      |      |        |       |   |
|-----|--------|------|-----------------------------|------|------|------|--------|-------|---|
| BRA | Brazil | 8064 | Conceicao Do Para           | 0.33 | 0.75 | 0.95 | 2680   | 262   | 0 |
| BRA | Brazil | 8065 | Conceicao Do Rio Verde      | 0.31 | 0.71 | 0.97 | 6808   | 1298  | 0 |
| BRA | Brazil | 8066 | Conceicao Dos Ouros         | 0.33 | 0.71 | 0.97 | 5439   | 1068  | 0 |
| BRA | Brazil | 8067 | Conego Marinho              | 0.36 | 0.81 | 1.00 | 3233   | 0     | 0 |
| BRA | Brazil | 8068 | Confins                     | 0.33 | 0.72 | 0.95 | 3042   | 537   | 0 |
| BRA | Brazil | 8069 | Congonhal                   | 0.26 | 0.65 | 0.89 | 6432   | 1809  | 0 |
| BRA | Brazil | 8070 | Congonhas                   | 0.34 | 0.78 | 0.99 | 25701  | 1077  | 0 |
| BRA | Brazil | 8071 | Congonhas Do Norte          | 0.47 | 0.83 | 0.99 | 1770   | 0     | 0 |
| BRA | Brazil | 8072 | Conquista                   | 0.39 | 0.82 | 0.97 | 3015   | 0     | 0 |
| BRA | Brazil | 8073 | Conselheiro Lafaiete        | 0.38 | 0.76 | 0.98 | 53544  | 5549  | 0 |
| BRA | Brazil | 8074 | Conselheiro Pena            | 0.31 | 0.77 | 1.00 | 11105  | 635   | 0 |
| BRA | Brazil | 8075 | Consolacao                  | 0.35 | 0.74 | 0.98 | 818    | 108   | 0 |
| BRA | Brazil | 8076 | Contagem                    | 0.30 | 0.75 | 0.99 | 326917 | 35000 | 0 |
| BRA | Brazil | 8077 | Coqueiral                   | 0.40 | 0.79 | 0.98 | 3762   | 77    | 0 |
| BRA | Brazil | 8078 | Coracao De Jesus            | 0.37 | 0.75 | 0.98 | 11635  | 1290  | 0 |
| BRA | Brazil | 8079 | Cordisburgo                 | 0.50 | 0.77 | 0.95 | 2784   | 284   | 0 |
| BRA | Brazil | 8080 | Cordislandia                | 0.30 | 0.68 | 0.91 | 1740   | 418   | 0 |
| BRA | Brazil | 8081 | Corinto                     | 0.40 | 0.78 | 0.99 | 9626   | 525   | 0 |
| BRA | Brazil | 8082 | Coroaci                     | 0.31 | 0.73 | 0.97 | 5064   | 705   | 0 |
| BRA | Brazil | 8083 | Coromandel                  | 0.38 | 0.76 | 0.96 | 11816  | 1241  | 0 |
| BRA | Brazil | 8084 | Coronel Fabriciano          | 0.31 | 0.75 | 0.99 | 51375  | 4896  | 0 |
| BRA | Brazil | 8085 | Coronel Murta               | 0.28 | 0.65 | 0.86 | 4757   | 1419  | 0 |
| BRA | Brazil | 8086 | Coronel Pacheco             | 0.28 | 0.70 | 0.93 | 1901   | 366   | 0 |
| BRA | Brazil | 8087 | Coronel Xavier Chaves       | 0.46 | 0.76 | 0.97 | 1214   | 140   | 0 |
| BRA | Brazil | 8088 | Corrego Danta               | 0.38 | 0.72 | 0.92 | 1452   | 261   | 0 |
| BRA | Brazil | 8089 | Corrego Do Bom Jesus        | 0.30 | 0.73 | 0.96 | 1911   | 270   | 0 |
| BRA | Brazil | 8090 | Corrego Fundo               | 0.41 | 0.73 | 0.97 | 2461   | 426   | 0 |
| BRA | Brazil | 8091 | Corrego Novo                | 0.31 | 0.70 | 0.94 | 1430   | 292   | 0 |
| BRA | Brazil | 8092 | Couto De Magalhaes De Minas | 0.31 | 0.74 | 0.99 | 2216   | 270   | 0 |
| BRA | Brazil | 8093 | Crisolita                   | 0.33 | 0.76 | 0.99 | 3163   | 261   | 0 |
| BRA | Brazil | 8094 | Cristais                    | 0.37 | 0.72 | 0.96 | 5422   | 1004  | 0 |
| BRA | Brazil | 8095 | Cristalia                   | 0.38 | 0.74 | 0.98 | 2532   | 381   | 0 |
| BRA | Brazil | 8096 | Cristiano Otoni             | 0.40 | 0.73 | 0.97 | 2102   | 383   | 0 |

|     |        |      |                        |      |      |      |        |       |   |
|-----|--------|------|------------------------|------|------|------|--------|-------|---|
| BRA | Brazil | 8097 | Cristina               | 0.30 | 0.70 | 0.96 | 5246   | 1028  | 0 |
| BRA | Brazil | 8098 | Crucilandia            | 0.57 | 0.81 | 0.96 | 1166   | 0     | 0 |
| BRA | Brazil | 8099 | Cruzeiro Da Fortaleza  | 0.67 | 0.86 | 1.00 | 502    | 0     | 0 |
| BRA | Brazil | 8100 | Cruzilia               | 0.41 | 0.77 | 0.97 | 6040   | 429   | 0 |
| BRA | Brazil | 8101 | Cuparaque              | 0.33 | 0.71 | 0.95 | 2407   | 462   | 0 |
| BRA | Brazil | 8102 | Curral De Dentro       | 0.48 | 0.83 | 1.00 | 2339   | 0     | 0 |
| BRA | Brazil | 8103 | Curvelo                | 0.33 | 0.73 | 0.97 | 37402  | 5229  | 0 |
| BRA | Brazil | 8104 | Datas                  | 0.31 | 0.69 | 0.92 | 2534   | 573   | 0 |
| BRA | Brazil | 8105 | Delfim Moreira         | 0.44 | 0.77 | 0.98 | 2921   | 245   | 0 |
| BRA | Brazil | 8106 | Delfinopolis           | 0.36 | 0.74 | 0.98 | 3158   | 396   | 0 |
| BRA | Brazil | 8107 | Delta                  | 0.63 | 0.90 | 1.00 | 1782   | 0     | 0 |
| BRA | Brazil | 8108 | Descoberto             | 0.29 | 0.69 | 0.95 | 2583   | 548   | 0 |
| BRA | Brazil | 8109 | Desterro De Entre Rios | 0.36 | 0.73 | 0.96 | 3210   | 510   | 0 |
| BRA | Brazil | 8110 | Desterro Do Melo       | 0.37 | 0.75 | 0.98 | 1300   | 164   | 0 |
| BRA | Brazil | 8111 | Diamantina             | 0.31 | 0.71 | 0.98 | 23665  | 4223  | 0 |
| BRA | Brazil | 8112 | Diogo De Vasconcelos   | 0.33 | 0.72 | 0.97 | 1788   | 297   | 0 |
| BRA | Brazil | 8113 | Dionisio               | 0.30 | 0.68 | 0.93 | 4163   | 982   | 0 |
| BRA | Brazil | 8114 | Divinesia              | 0.31 | 0.73 | 0.98 | 1789   | 240   | 0 |
| BRA | Brazil | 8115 | Divino                 | 0.31 | 0.70 | 0.94 | 9870   | 2056  | 0 |
| BRA | Brazil | 8116 | Divino Das Laranjeiras | 0.36 | 0.79 | 0.99 | 2258   | 72    | 0 |
| BRA | Brazil | 8117 | Divinolandia De Minas  | 0.32 | 0.76 | 0.99 | 3748   | 332   | 0 |
| BRA | Brazil | 8118 | Divinopolis            | 0.29 | 0.75 | 0.97 | 121721 | 12092 | 0 |
| BRA | Brazil | 8119 | Divisa Alegre          | 0.31 | 0.70 | 0.95 | 3264   | 662   | 0 |
| BRA | Brazil | 8120 | Divisa Nova            | 0.34 | 0.77 | 0.99 | 2826   | 208   | 0 |
| BRA | Brazil | 8121 | Divisopolis            | 0.29 | 0.67 | 0.90 | 5363   | 1363  | 0 |
| BRA | Brazil | 8122 | Dom Bosco              | 0.67 | 0.86 | 0.97 | 507    | 0     | 0 |
| BRA | Brazil | 8123 | Dom Cavati             | 0.32 | 0.74 | 0.98 | 2585   | 314   | 0 |
| BRA | Brazil | 8124 | Dom Joaquim            | 0.45 | 0.85 | 0.99 | 1539   | 0     | 0 |
| BRA | Brazil | 8125 | Dom Silverio           | 0.28 | 0.67 | 0.93 | 2806   | 675   | 0 |
| BRA | Brazil | 8126 | Dom Vicoso             | 0.29 | 0.69 | 0.95 | 1542   | 330   | 0 |
| BRA | Brazil | 8127 | Dona Euzebia           | 0.51 | 0.80 | 0.99 | 1717   | 0     | 0 |
| BRA | Brazil | 8128 | Dores De Campos        | 0.27 | 0.68 | 0.94 | 5364   | 1202  | 0 |
| BRA | Brazil | 8129 | Dores De Guanhaes      | 0.31 | 0.78 | 0.99 | 2553   | 112   | 0 |

|     |        |      |                           |      |      |      |       |      |      |
|-----|--------|------|---------------------------|------|------|------|-------|------|------|
| BRA | Brazil | 8130 | Dores Do Indaia           | 0.39 | 0.76 | 0.95 | 5769  | 493  | 0    |
| BRA | Brazil | 8131 | Dores Do Turvo            | 0.80 | 0.89 | 0.95 | 1     | 0    | 0    |
| BRA | Brazil | 8132 | Doresopolis               | 0.53 | 0.85 | 0.98 | 415   | 0    | 0    |
| BRA | Brazil | 8133 | Douradoquara              | 0.56 | 0.81 | 0.96 | 467   | 0    | 0    |
| BRA | Brazil | 8134 | Durande                   | 0.33 | 0.70 | 0.93 | 3698  | 813  | 0    |
| BRA | Brazil | 8135 | Eloi Mendes               | 0.30 | 0.71 | 0.97 | 14017 | 2448 | 0    |
| BRA | Brazil | 8136 | Engenheiro Caldas         | 0.31 | 0.67 | 0.88 | 5372  | 1414 | 0    |
| BRA | Brazil | 8137 | Engenheiro Navarro        | 0.58 | 0.85 | 1.00 | 1620  | 0    | 0    |
| BRA | Brazil | 8138 | Entre Folhas              | 0.32 | 0.73 | 0.99 | 2409  | 338  | 0    |
| BRA | Brazil | 8139 | Entre Rios De Minas       | 0.21 | 0.60 | 0.85 | 8997  | 2994 | 0    |
| BRA | Brazil | 8140 | Eralvia                   | 0.54 | 0.80 | 0.98 | 4942  | 0    | 0    |
| BRA | Brazil | 8141 | Esmeraldas                | 0.29 | 0.73 | 0.98 | 38448 | 5356 | 0    |
| BRA | Brazil | 8142 | Espera Feliz              | 0.30 | 0.75 | 0.99 | 12725 | 1173 | 0    |
| BRA | Brazil | 8143 | Espinosa                  | 0.45 | 0.77 | 0.99 | 11241 | 975  | 0    |
| BRA | Brazil | 8144 | Espirito Santo Do Dourado | 0.28 | 0.64 | 0.85 | 2468  | 762  | 0    |
| BRA | Brazil | 8145 | Estiva                    | 0.45 | 0.79 | 0.97 | 3979  | 97   | 0    |
| BRA | Brazil | 8146 | Estrela Dalva             | 0.28 | 0.71 | 0.95 | 1301  | 235  | 0    |
| BRA | Brazil | 8147 | Estrela Do Indaia         | 0.46 | 0.76 | 0.93 | 1238  | 131  | 0    |
| BRA | Brazil | 8148 | Estrela Do Sul            | 0.46 | 0.74 | 0.93 | 2653  | 462  | 0    |
| BRA | Brazil | 8149 | Eugenopolis               | 0.28 | 0.69 | 0.95 | 5870  | 1288 | 0    |
| BRA | Brazil | 8150 | Ewbank Da Camara          | 0.32 | 0.72 | 0.97 | 1889  | 298  | 0    |
| BRA | Brazil | 8151 | Extrema                   | 0.32 | 0.71 | 0.96 | 17325 | 3070 | 0    |
| BRA | Brazil | 8152 | Fama                      | 0.40 | 0.76 | 0.95 | 936   | 104  | 0    |
| BRA | Brazil | 8153 | Faria Lemos               | 0.52 | 0.80 | 0.99 | 955   | 0    | 0    |
| BRA | Brazil | 8154 | Felicio Dos Santos        | 0.43 | 0.82 | 1.00 | 1859  | 0    | 0    |
| BRA | Brazil | 8155 | Felisburgo                | 0.46 | 0.77 | 0.99 | 2508  | 209  | 0    |
| BRA | Brazil | 8156 | Felixlandia               | 0.30 | 0.70 | 0.94 | 7713  | 1475 | 0    |
| BRA | Brazil | 8157 | Fernandes Tourinho        | 0.39 | 0.75 | 0.96 | 1525  | 169  | 0    |
| BRA | Brazil | 8158 | Ferros                    | 0.35 | 0.77 | 0.98 | 4778  | 327  | 0    |
| BRA | Brazil | 8159 | Fervedouro                | 0.52 | 0.79 | 0.99 | 2918  | 141  | 0    |
| BRA | Brazil | 8160 | Florestal                 | 0.28 | 0.72 | 0.96 | 3890  | 609  | 0    |
| BRA | Brazil | 8161 | Formiga                   | 0.34 | 0.78 | 0.97 | 31276 | 1339 | 0    |
| BRA | Brazil | 8162 | Formoso                   | 0.17 | 0.49 | 0.65 | 8577  | 4191 | 2046 |

|     |        |      |                      |      |      |      |        |       |   |
|-----|--------|------|----------------------|------|------|------|--------|-------|---|
| BRA | Brazil | 8163 | Fortaleza De Minas   | 0.41 | 0.79 | 0.97 | 1673   | 55    | 0 |
| BRA | Brazil | 8164 | Fortuna De Minas     | 0.44 | 0.83 | 0.97 | 1043   | 0     | 0 |
| BRA | Brazil | 8165 | Francisco Badaro     | 0.30 | 0.72 | 0.95 | 5210   | 820   | 0 |
| BRA | Brazil | 8166 | Francisco Dumont     | 0.37 | 0.79 | 1.00 | 2251   | 54    | 0 |
| BRA | Brazil | 8167 | Francisco Sa         | 0.32 | 0.73 | 0.97 | 12827  | 1941  | 0 |
| BRA | Brazil | 8168 | Franciscopolis       | 0.30 | 0.71 | 0.97 | 2844   | 518   | 0 |
| BRA | Brazil | 8169 | Frei Gaspar          | 0.32 | 0.77 | 0.99 | 2898   | 196   | 0 |
| BRA | Brazil | 8170 | Frei Inocencio       | 0.31 | 0.71 | 0.97 | 4833   | 896   | 0 |
| BRA | Brazil | 8171 | Frei Lagonegro       | 0.43 | 0.82 | 0.99 | 1302   | 0     | 0 |
| BRA | Brazil | 8172 | Fronteira            | 0.43 | 0.78 | 0.97 | 6738   | 395   | 0 |
| BRA | Brazil | 8173 | Fronteira Dos Vales  | 0.31 | 0.72 | 0.98 | 2319   | 397   | 0 |
| BRA | Brazil | 8174 | Fruta De Leite       | 0.33 | 0.76 | 0.99 | 2628   | 213   | 0 |
| BRA | Brazil | 8175 | Frutal               | 0.41 | 0.75 | 0.96 | 22915  | 2751  | 0 |
| BRA | Brazil | 8176 | Funilandia           | 0.32 | 0.72 | 0.97 | 2029   | 358   | 0 |
| BRA | Brazil | 8177 | Galileia             | 0.32 | 0.73 | 0.97 | 3477   | 502   | 0 |
| BRA | Brazil | 8178 | Gameleiras           | 0.44 | 0.84 | 0.99 | 1938   | 0     | 0 |
| BRA | Brazil | 8179 | Glaucilandia         | 0.64 | 0.86 | 0.99 | 436    | 0     | 0 |
| BRA | Brazil | 8180 | Goiabeira            | 0.30 | 0.67 | 0.90 | 1651   | 420   | 0 |
| BRA | Brazil | 8181 | Goiana               | 0.28 | 0.68 | 0.93 | 2047   | 472   | 0 |
| BRA | Brazil | 8182 | Goncalves            | 0.38 | 0.82 | 0.99 | 1847   | 0     | 0 |
| BRA | Brazil | 8183 | Gonzaga              | 0.30 | 0.68 | 0.90 | 3076   | 768   | 0 |
| BRA | Brazil | 8184 | Gouvea               | 0.37 | 0.74 | 0.97 | 5142   | 693   | 0 |
| BRA | Brazil | 8185 | Governador Valadares | 0.32 | 0.75 | 0.99 | 134200 | 13020 | 0 |
| BRA | Brazil | 8186 | Grao Mogol           | 0.34 | 0.74 | 0.98 | 7410   | 895   | 0 |
| BRA | Brazil | 8187 | Grupiara             | 0.69 | 0.87 | 0.95 | 156    | 0     | 0 |
| BRA | Brazil | 8188 | Guanhaes             | 0.41 | 0.81 | 0.99 | 13292  | 0     | 0 |
| BRA | Brazil | 8189 | Guape                | 0.41 | 0.79 | 0.97 | 5627   | 146   | 0 |
| BRA | Brazil | 8190 | Guaraciaba           | 0.38 | 0.79 | 0.96 | 4407   | 80    | 0 |
| BRA | Brazil | 8191 | Guaraciama           | 0.63 | 0.85 | 0.99 | 872    | 0     | 0 |
| BRA | Brazil | 8192 | Guaranesia           | 0.29 | 0.72 | 0.98 | 9973   | 1592  | 0 |
| BRA | Brazil | 8193 | Guarani              | 0.33 | 0.73 | 0.97 | 4219   | 626   | 0 |
| BRA | Brazil | 8194 | Guarara              | 0.40 | 0.74 | 0.98 | 1790   | 269   | 0 |
| BRA | Brazil | 8195 | Guarda-mor           | 0.60 | 0.83 | 0.99 | 1316   | 0     | 0 |

|     |        |      |                   |      |      |      |        |       |   |
|-----|--------|------|-------------------|------|------|------|--------|-------|---|
| BRA | Brazil | 8196 | Guaxupe           | 0.29 | 0.73 | 0.98 | 26560  | 3873  | 0 |
| BRA | Brazil | 8197 | Guidoval          | 0.29 | 0.70 | 0.96 | 3720   | 711   | 0 |
| BRA | Brazil | 8198 | Guimarania        | 0.39 | 0.81 | 0.99 | 3014   | 0     | 0 |
| BRA | Brazil | 8199 | Guiricema         | 0.52 | 0.81 | 0.95 | 2473   | 0     | 0 |
| BRA | Brazil | 8200 | Gurinhata         | 0.55 | 0.80 | 0.96 | 1489   | 0     | 0 |
| BRA | Brazil | 8201 | Heliodora         | 0.30 | 0.70 | 0.96 | 3316   | 677   | 0 |
| BRA | Brazil | 8202 | Iapu              | 0.47 | 0.79 | 0.99 | 3609   | 99    | 0 |
| BRA | Brazil | 8203 | Ibertioga         | 0.56 | 0.80 | 0.98 | 1256   | 12    | 0 |
| BRA | Brazil | 8204 | Ibia              | 0.31 | 0.70 | 0.95 | 12249  | 2625  | 0 |
| BRA | Brazil | 8205 | Ibiai             | 0.40 | 0.74 | 0.99 | 3358   | 538   | 0 |
| BRA | Brazil | 8206 | Ibiracatu         | 0.45 | 0.85 | 1.00 | 2067   | 0     | 0 |
| BRA | Brazil | 8207 | Ibiraci           | 0.34 | 0.74 | 0.99 | 6477   | 867   | 0 |
| BRA | Brazil | 8208 | Ibirite           | 0.31 | 0.74 | 0.99 | 91313  | 12046 | 0 |
| BRA | Brazil | 8209 | Ibitiura De Minas | 0.28 | 0.67 | 0.92 | 1837   | 462   | 0 |
| BRA | Brazil | 8210 | Ibituruna         | 0.66 | 0.83 | 0.97 | 425    | 0     | 0 |
| BRA | Brazil | 8211 | Icarai De Minas   | 0.42 | 0.78 | 0.99 | 4444   | 232   | 0 |
| BRA | Brazil | 8212 | Igarape           | 0.30 | 0.73 | 0.98 | 20746  | 2894  | 0 |
| BRA | Brazil | 8213 | Igaratinga        | 0.28 | 0.72 | 0.96 | 5530   | 891   | 0 |
| BRA | Brazil | 8214 | Iguatama          | 0.30 | 0.70 | 0.94 | 4104   | 788   | 0 |
| BRA | Brazil | 8215 | Ijaci             | 0.35 | 0.72 | 0.97 | 2919   | 490   | 0 |
| BRA | Brazil | 8216 | Ilicinea          | 0.30 | 0.71 | 0.97 | 6146   | 1169  | 0 |
| BRA | Brazil | 8217 | Imbe De Minas     | 0.29 | 0.69 | 0.93 | 3300   | 749   | 0 |
| BRA | Brazil | 8218 | Inconfidentes     | 0.27 | 0.66 | 0.90 | 3893   | 1040  | 0 |
| BRA | Brazil | 8219 | Indaiabira        | 0.41 | 0.75 | 0.97 | 2916   | 358   | 0 |
| BRA | Brazil | 8220 | Indianopolis      | 0.56 | 0.90 | 1.00 | 1649   | 0     | 0 |
| BRA | Brazil | 8221 | Ingai             | 0.47 | 0.77 | 0.97 | 931    | 90    | 0 |
| BRA | Brazil | 8222 | Inhapim           | 0.35 | 0.73 | 0.98 | 10921  | 1594  | 0 |
| BRA | Brazil | 8223 | Inhauma           | 0.31 | 0.74 | 0.97 | 3066   | 349   | 0 |
| BRA | Brazil | 8224 | Inimutaba         | 0.46 | 0.78 | 0.96 | 2438   | 177   | 0 |
| BRA | Brazil | 8225 | Ipaba             | 0.30 | 0.75 | 0.98 | 8816   | 960   | 0 |
| BRA | Brazil | 8226 | Ipanema           | 0.28 | 0.67 | 0.93 | 10446  | 2531  | 0 |
| BRA | Brazil | 8227 | Ipatinga          | 0.28 | 0.72 | 0.96 | 132685 | 21000 | 0 |
| BRA | Brazil | 8228 | Ipiacu            | 0.56 | 0.84 | 0.96 | 1032   | 0     | 0 |

|     |        |      |                       |      |      |      |       |      |   |
|-----|--------|------|-----------------------|------|------|------|-------|------|---|
| BRA | Brazil | 8229 | Ipuiuna               | 0.35 | 0.75 | 0.96 | 4519  | 537  | 0 |
| BRA | Brazil | 8230 | Irai De Minas         | 0.62 | 0.85 | 0.99 | 1131  | 0    | 0 |
| BRA | Brazil | 8231 | Itabira               | 0.29 | 0.74 | 0.97 | 61196 | 7515 | 0 |
| BRA | Brazil | 8232 | Itabirinha De Mantena | 0.31 | 0.72 | 0.97 | 5629  | 933  | 0 |
| BRA | Brazil | 8233 | Itabirito             | 0.29 | 0.74 | 0.98 | 26112 | 2960 | 0 |
| BRA | Brazil | 8234 | Itacambira            | 0.39 | 0.72 | 0.96 | 2232  | 454  | 0 |
| BRA | Brazil | 8235 | Itacarambi            | 0.36 | 0.77 | 1.00 | 8473  | 520  | 0 |
| BRA | Brazil | 8236 | Itaguara              | 0.37 | 0.76 | 0.96 | 5707  | 563  | 0 |
| BRA | Brazil | 8237 | Itaipe                | 0.33 | 0.76 | 1.00 | 5900  | 526  | 0 |
| BRA | Brazil | 8238 | Itajuba               | 0.32 | 0.77 | 0.99 | 47111 | 2701 | 0 |
| BRA | Brazil | 8239 | Itamarandiba          | 0.31 | 0.72 | 0.99 | 17070 | 2737 | 0 |
| BRA | Brazil | 8240 | Itamarati De Minas    | 0.27 | 0.67 | 0.92 | 2444  | 621  | 0 |
| BRA | Brazil | 8241 | Itambacuri            | 0.31 | 0.70 | 0.96 | 11661 | 2274 | 0 |
| BRA | Brazil | 8242 | Itambe Do Mato Dentro | 0.41 | 0.78 | 0.97 | 864   | 56   | 0 |
| BRA | Brazil | 8243 | Itamogi               | 0.31 | 0.73 | 0.98 | 5123  | 739  | 0 |
| BRA | Brazil | 8244 | Itamonte              | 0.28 | 0.66 | 0.90 | 7993  | 2141 | 0 |
| BRA | Brazil | 8245 | Itanhandu             | 0.31 | 0.71 | 0.96 | 7609  | 1342 | 0 |
| BRA | Brazil | 8246 | Itanhomi              | 0.36 | 0.76 | 0.99 | 5507  | 464  | 0 |
| BRA | Brazil | 8247 | Itaobim               | 0.44 | 0.76 | 0.99 | 7814  | 901  | 0 |
| BRA | Brazil | 8248 | Itapagipe             | 0.31 | 0.70 | 0.93 | 7379  | 1585 | 0 |
| BRA | Brazil | 8249 | Itapecerica           | 0.28 | 0.73 | 0.96 | 11390 | 1647 | 0 |
| BRA | Brazil | 8250 | Itapeva               | 0.30 | 0.72 | 0.98 | 4860  | 799  | 0 |
| BRA | Brazil | 8251 | Itatiaiuçu            | 0.41 | 0.82 | 1.00 | 4314  | 0    | 0 |
| BRA | Brazil | 8252 | Itau De Minas         | 0.35 | 0.71 | 0.95 | 7211  | 1434 | 0 |
| BRA | Brazil | 8253 | Itauna                | 0.29 | 0.75 | 0.97 | 47147 | 4726 | 0 |
| BRA | Brazil | 8254 | Itaverava             | 0.46 | 0.78 | 0.97 | 1918  | 132  | 0 |
| BRA | Brazil | 8255 | Itinga                | 0.33 | 0.74 | 0.98 | 7112  | 974  | 0 |
| BRA | Brazil | 8256 | Itueta                | 0.34 | 0.78 | 0.99 | 2817  | 137  | 0 |
| BRA | Brazil | 8257 | Ituiutaba             | 0.35 | 0.74 | 0.96 | 46786 | 6282 | 0 |
| BRA | Brazil | 8258 | Itumirim              | 0.33 | 0.76 | 0.98 | 2807  | 250  | 0 |
| BRA | Brazil | 8259 | Iturama               | 0.42 | 0.79 | 0.99 | 14908 | 520  | 0 |
| BRA | Brazil | 8260 | Itutinga              | 0.30 | 0.74 | 0.96 | 2054  | 232  | 0 |
| BRA | Brazil | 8261 | Jaboticatubas         | 0.27 | 0.68 | 0.95 | 10569 | 2430 | 0 |

|     |        |      |                         |      |      |      |        |       |   |
|-----|--------|------|-------------------------|------|------|------|--------|-------|---|
| BRA | Brazil | 8262 | Jacinto                 | 0.30 | 0.69 | 0.93 | 6314   | 1381  | 0 |
| BRA | Brazil | 8263 | Jacui                   | 0.34 | 0.76 | 0.99 | 3567   | 280   | 0 |
| BRA | Brazil | 8264 | Jacutinga               | 0.29 | 0.69 | 0.94 | 13000  | 2895  | 0 |
| BRA | Brazil | 8265 | Jaguaracu               | 0.26 | 0.68 | 0.92 | 2143   | 476   | 0 |
| BRA | Brazil | 8266 | Jaiba                   | 0.39 | 0.76 | 0.99 | 15233  | 1683  | 0 |
| BRA | Brazil | 8267 | Jampruca                | 0.31 | 0.71 | 0.96 | 2463   | 452   | 0 |
| BRA | Brazil | 8268 | Janauba                 | 0.38 | 0.76 | 0.99 | 29508  | 2756  | 0 |
| BRA | Brazil | 8269 | Januaria                | 0.35 | 0.78 | 1.00 | 31644  | 1191  | 0 |
| BRA | Brazil | 8270 | Japaraiba               | 0.51 | 0.82 | 0.99 | 1260   | 0     | 0 |
| BRA | Brazil | 8271 | Japonvar                | 0.45 | 0.82 | 0.99 | 2947   | 0     | 0 |
| BRA | Brazil | 8272 | Jeceaba                 | 0.42 | 0.79 | 0.96 | 1903   | 29    | 0 |
| BRA | Brazil | 8273 | Jenipapo De Minas       | 0.33 | 0.73 | 0.98 | 3557   | 536   | 0 |
| BRA | Brazil | 8274 | Jequeri                 | 0.30 | 0.69 | 0.95 | 6580   | 1483  | 0 |
| BRA | Brazil | 8275 | Jequitai                | 0.56 | 0.81 | 0.97 | 1873   | 0     | 0 |
| BRA | Brazil | 8276 | Jequitiba               | 0.36 | 0.78 | 0.97 | 2312   | 121   | 0 |
| BRA | Brazil | 8277 | Jequitinhonha           | 0.32 | 0.71 | 0.96 | 12397  | 2277  | 0 |
| BRA | Brazil | 8278 | Jesuania                | 0.28 | 0.67 | 0.92 | 2524   | 621   | 0 |
| BRA | Brazil | 8279 | Joaima                  | 0.31 | 0.69 | 0.92 | 7630   | 1753  | 0 |
| BRA | Brazil | 8280 | Joanesia                | 0.54 | 0.77 | 0.96 | 1281   | 141   | 0 |
| BRA | Brazil | 8281 | Joao Monlevade          | 0.32 | 0.78 | 1.00 | 37770  | 1955  | 0 |
| BRA | Brazil | 8282 | Joao Pinheiro           | 0.70 | 0.89 | 1.00 | 4723   | 0     | 0 |
| BRA | Brazil | 8283 | Joaquim Felicio         | 0.41 | 0.76 | 0.97 | 1829   | 186   | 0 |
| BRA | Brazil | 8284 | Jordania                | 0.29 | 0.68 | 0.93 | 5892   | 1402  | 0 |
| BRA | Brazil | 8285 | Jose Goncalves De Minas | 0.44 | 0.81 | 1.00 | 1695   | 0     | 0 |
| BRA | Brazil | 8286 | Jose Raydan             | 0.33 | 0.78 | 1.00 | 2295   | 100   | 0 |
| BRA | Brazil | 8287 | Josenopolis             | 0.41 | 0.76 | 0.98 | 1900   | 186   | 0 |
| BRA | Brazil | 8288 | Juatuba                 | 0.33 | 0.77 | 0.98 | 12357  | 758   | 0 |
| BRA | Brazil | 8289 | Juiz De Fora            | 0.27 | 0.71 | 0.96 | 298616 | 51478 | 0 |
| BRA | Brazil | 8290 | Juramento               | 0.38 | 0.76 | 0.98 | 1810   | 196   | 0 |
| BRA | Brazil | 8291 | Juruia                  | 0.55 | 0.79 | 0.97 | 2525   | 96    | 0 |
| BRA | Brazil | 8292 | Juvenilia               | 0.37 | 0.76 | 0.98 | 2768   | 233   | 0 |
| BRA | Brazil | 8293 | Ladainha                | 0.31 | 0.74 | 0.99 | 8801   | 1081  | 0 |
| BRA | Brazil | 8294 | Lagamar                 | 0.59 | 0.82 | 0.95 | 1619   | 0     | 0 |

|     |        |      |                        |      |      |      |       |      |   |
|-----|--------|------|------------------------|------|------|------|-------|------|---|
| BRA | Brazil | 8295 | Lagoa Da Prata         | 0.33 | 0.75 | 0.96 | 24270 | 2504 | 0 |
| BRA | Brazil | 8296 | Lagoa Dos Patos        | 0.45 | 0.77 | 0.98 | 1501  | 124  | 0 |
| BRA | Brazil | 8297 | Lagoa Dourada          | 0.49 | 0.77 | 0.98 | 4087  | 426  | 0 |
| BRA | Brazil | 8298 | Lagoa Formosa          | 0.45 | 0.77 | 0.96 | 6376  | 579  | 0 |
| BRA | Brazil | 8299 | Lagoa Grande           | 0.54 | 0.81 | 0.97 | 2406  | 0    | 0 |
| BRA | Brazil | 8300 | Lagoa Santa            | 0.28 | 0.72 | 0.96 | 34798 | 5557 | 0 |
| BRA | Brazil | 8301 | Lajinha                | 0.30 | 0.68 | 0.91 | 10217 | 2507 | 0 |
| BRA | Brazil | 8302 | Lambari                | 0.34 | 0.75 | 0.98 | 9451  | 971  | 0 |
| BRA | Brazil | 8303 | Lamim                  | 0.61 | 0.83 | 0.98 | 666   | 0    | 0 |
| BRA | Brazil | 8304 | Laranjal               | 0.67 | 0.90 | 1.00 | 864   | 0    | 0 |
| BRA | Brazil | 8305 | Lassance               | 0.68 | 0.87 | 0.98 | 816   | 0    | 0 |
| BRA | Brazil | 8306 | Lavras                 | 0.28 | 0.73 | 0.97 | 53419 | 7431 | 0 |
| BRA | Brazil | 8307 | Leandro Ferreira       | 0.84 | 0.94 | 1.00 | 0     | 0    | 0 |
| BRA | Brazil | 8308 | Leme Do Prado          | 0.43 | 0.80 | 1.00 | 1805  | 0    | 0 |
| BRA | Brazil | 8309 | Leopoldina             | 0.31 | 0.74 | 0.97 | 26349 | 3393 | 0 |
| BRA | Brazil | 8310 | Liberdade              | 0.28 | 0.70 | 0.96 | 2760  | 509  | 0 |
| BRA | Brazil | 8311 | Lima Duarte            | 0.29 | 0.70 | 0.96 | 8687  | 1691 | 0 |
| BRA | Brazil | 8312 | Limeira Do Oeste       | 0.49 | 0.84 | 0.99 | 2308  | 0    | 0 |
| BRA | Brazil | 8313 | Lontra                 | 0.36 | 0.74 | 0.97 | 4052  | 543  | 0 |
| BRA | Brazil | 8314 | Luisburgo              | 0.60 | 0.87 | 1.00 | 1310  | 0    | 0 |
| BRA | Brazil | 8315 | Luislandia             | 0.85 | 0.93 | 0.99 | 0     | 0    | 0 |
| BRA | Brazil | 8316 | Luminarias             | 0.29 | 0.67 | 0.91 | 2862  | 725  | 0 |
| BRA | Brazil | 8317 | Luz                    | 0.43 | 0.83 | 0.97 | 6863  | 0    | 0 |
| BRA | Brazil | 8318 | Machacalis             | 0.32 | 0.79 | 0.99 | 3439  | 71   | 0 |
| BRA | Brazil | 8319 | Machado                | 0.34 | 0.75 | 0.99 | 19566 | 2000 | 0 |
| BRA | Brazil | 8320 | Madre De Deus De Minas | 0.31 | 0.68 | 0.92 | 2528  | 608  | 0 |
| BRA | Brazil | 8321 | Malacacheta            | 0.30 | 0.66 | 0.86 | 9402  | 2644 | 0 |
| BRA | Brazil | 8322 | Mamonas                | 0.43 | 0.78 | 0.97 | 2397  | 125  | 0 |
| BRA | Brazil | 8323 | Manga                  | 0.37 | 0.76 | 1.00 | 8704  | 859  | 0 |
| BRA | Brazil | 8324 | Manhuacu               | 0.31 | 0.71 | 0.97 | 43615 | 7685 | 0 |
| BRA | Brazil | 8325 | Manhumirim             | 0.29 | 0.66 | 0.88 | 11746 | 3219 | 0 |
| BRA | Brazil | 8326 | Mantena                | 0.29 | 0.72 | 0.98 | 14478 | 2248 | 0 |
| BRA | Brazil | 8327 | Mar De Espanha         | 0.29 | 0.68 | 0.94 | 6511  | 1497 | 0 |



|     |        |      |                 |      |      |      |       |      |   |
|-----|--------|------|-----------------|------|------|------|-------|------|---|
| BRA | Brazil | 8328 | Maravilhas      | 0.52 | 0.82 | 0.98 | 2224  | 0    | 0 |
| BRA | Brazil | 8329 | Maria Da Fe     | 0.65 | 0.84 | 0.99 | 2214  | 0    | 0 |
| BRA | Brazil | 8330 | Mariana         | 0.30 | 0.77 | 1.00 | 30290 | 1977 | 0 |
| BRA | Brazil | 8331 | Marilac         | 0.32 | 0.74 | 0.99 | 2047  | 261  | 0 |
| BRA | Brazil | 8332 | Mario Campos    | 0.32 | 0.73 | 0.99 | 6755  | 962  | 0 |
| BRA | Brazil | 8333 | Maripa De Minas | 0.30 | 0.71 | 0.96 | 1477  | 265  | 0 |
| BRA | Brazil | 8334 | Marlيريا        | 0.30 | 0.68 | 0.93 | 2189  | 508  | 0 |
| BRA | Brazil | 8335 | Marmelopolis    | 0.32 | 0.69 | 0.96 | 1403  | 308  | 0 |
| BRA | Brazil | 8336 | Martinho Campos | 0.37 | 0.78 | 0.97 | 5791  | 308  | 0 |
| BRA | Brazil | 8337 | Martins Soares  | 0.29 | 0.68 | 0.93 | 4409  | 1037 | 0 |
| BRA | Brazil | 8338 | Mata Verde      | 0.33 | 0.73 | 0.98 | 3478  | 517  | 0 |
| BRA | Brazil | 8339 | Materlandia     | 0.30 | 0.67 | 0.88 | 2315  | 619  | 0 |
| BRA | Brazil | 8340 | Mateus Leme     | 0.30 | 0.74 | 0.98 | 15304 | 1975 | 0 |
| BRA | Brazil | 8341 | Mathias Lobato  | 0.32 | 0.74 | 0.99 | 1700  | 226  | 0 |
| BRA | Brazil | 8342 | Matias Barbosa  | 0.30 | 0.71 | 0.96 | 7486  | 1316 | 0 |
| BRA | Brazil | 8343 | Matias Cardoso  | 0.34 | 0.75 | 0.99 | 5120  | 613  | 0 |
| BRA | Brazil | 8344 | Matipo          | 0.30 | 0.70 | 0.96 | 9661  | 1962 | 0 |
| BRA | Brazil | 8345 | Mato Verde      | 0.37 | 0.73 | 0.98 | 5479  | 845  | 0 |
| BRA | Brazil | 8346 | Matozinhos      | 0.37 | 0.77 | 0.99 | 16070 | 1252 | 0 |
| BRA | Brazil | 8347 | Matutina        | 0.39 | 0.75 | 0.98 | 1590  | 177  | 0 |
| BRA | Brazil | 8348 | Medeiros        | 0.42 | 0.74 | 0.96 | 1432  | 221  | 0 |
| BRA | Brazil | 8349 | Medina          | 0.31 | 0.69 | 0.93 | 10399 | 2270 | 0 |
| BRA | Brazil | 8350 | Mendes Pimentel | 0.36 | 0.77 | 0.95 | 2872  | 194  | 0 |
| BRA | Brazil | 8351 | Merces          | 0.34 | 0.70 | 0.94 | 5025  | 1104 | 0 |
| BRA | Brazil | 8352 | Mesquita        | 0.31 | 0.76 | 1.00 | 2940  | 257  | 0 |
| BRA | Brazil | 8353 | Minas Novas     | 0.33 | 0.73 | 0.98 | 15374 | 2181 | 0 |
| BRA | Brazil | 8354 | Minduri         | 0.39 | 0.79 | 0.98 | 1642  | 29   | 0 |
| BRA | Brazil | 8355 | Mirabela        | 0.40 | 0.77 | 0.99 | 5520  | 424  | 0 |
| BRA | Brazil | 8356 | Miradouro       | 0.35 | 0.72 | 0.97 | 4917  | 859  | 0 |
| BRA | Brazil | 8357 | Mirai           | 0.30 | 0.76 | 0.96 | 7537  | 648  | 0 |
| BRA | Brazil | 8358 | Miravania       | 0.38 | 0.79 | 1.00 | 2031  | 36   | 0 |
| BRA | Brazil | 8359 | Moeda           | 0.39 | 0.78 | 0.99 | 1881  | 83   | 0 |
| BRA | Brazil | 8360 | Moema           | 0.34 | 0.77 | 0.99 | 3429  | 216  | 0 |

|     |        |      |                       |      |      |      |        |       |   |
|-----|--------|------|-----------------------|------|------|------|--------|-------|---|
| BRA | Brazil | 8361 | Monjolos              | 0.30 | 0.70 | 0.97 | 1164   | 225   | 0 |
| BRA | Brazil | 8362 | Monsenhor Paulo       | 0.46 | 0.77 | 0.97 | 2995   | 224   | 0 |
| BRA | Brazil | 8363 | Montalvania           | 0.38 | 0.80 | 1.00 | 6069   | 51    | 0 |
| BRA | Brazil | 8364 | Monte Alegre De Minas | 0.36 | 0.73 | 0.95 | 9332   | 1494  | 0 |
| BRA | Brazil | 8365 | Monte Azul            | 0.49 | 0.80 | 0.98 | 6971   | 0     | 0 |
| BRA | Brazil | 8366 | Monte Belo            | 0.32 | 0.77 | 0.97 | 6507   | 363   | 0 |
| BRA | Brazil | 8367 | Monte Carmelo         | 0.42 | 0.82 | 0.99 | 18559  | 0     | 0 |
| BRA | Brazil | 8368 | Monte Formoso         | 0.34 | 0.76 | 0.99 | 2275   | 214   | 0 |
| BRA | Brazil | 8369 | Monte Santo De Minas  | 0.36 | 0.78 | 0.98 | 9582   | 397   | 0 |
| BRA | Brazil | 8370 | Monte Siao            | 0.27 | 0.69 | 0.96 | 12249  | 2558  | 0 |
| BRA | Brazil | 8371 | Montes Claros         | 0.37 | 0.73 | 0.98 | 173268 | 26547 | 0 |
| BRA | Brazil | 8372 | Montezuma             | 0.38 | 0.75 | 0.99 | 3475   | 406   | 0 |
| BRA | Brazil | 8373 | Morada Nova De Minas  | 0.46 | 0.82 | 0.98 | 3012   | 0     | 0 |
| BRA | Brazil | 8374 | Morro Da Garca        | 0.40 | 0.81 | 0.99 | 1024   | 0     | 0 |
| BRA | Brazil | 8375 | Morro Do Pilar        | 0.38 | 0.82 | 0.99 | 1422   | 0     | 0 |
| BRA | Brazil | 8376 | Munhoz                | 0.30 | 0.70 | 0.96 | 3145   | 649   | 0 |
| BRA | Brazil | 8377 | Muriae                | 0.30 | 0.71 | 0.97 | 54879  | 9431  | 0 |
| BRA | Brazil | 8378 | Mutum                 | 0.30 | 0.71 | 0.97 | 13704  | 2459  | 0 |
| BRA | Brazil | 8379 | Muzambinho            | 0.31 | 0.75 | 0.98 | 10418  | 1139  | 0 |
| BRA | Brazil | 8380 | Nacip Raydan          | 0.43 | 0.76 | 0.98 | 1202   | 140   | 0 |
| BRA | Brazil | 8381 | Nanuque               | 0.31 | 0.71 | 0.97 | 20916  | 3767  | 0 |
| BRA | Brazil | 8382 | Naque                 | 0.33 | 0.81 | 1.00 | 3021   | 0     | 0 |
| BRA | Brazil | 8383 | Natalandia            | 0.96 | 0.97 | 0.99 | 0      | 0     | 0 |
| BRA | Brazil | 8384 | Natercia              | 0.47 | 0.76 | 0.96 | 1629   | 194   | 0 |
| BRA | Brazil | 8385 | Nazareno              | 0.38 | 0.75 | 0.98 | 3586   | 427   | 0 |
| BRA | Brazil | 8386 | Nepomuceno            | 0.32 | 0.75 | 0.98 | 13114  | 1243  | 0 |
| BRA | Brazil | 8387 | Ninheira              | 0.33 | 0.75 | 0.98 | 5088   | 587   | 0 |
| BRA | Brazil | 8388 | Nova Belem            | 0.36 | 0.77 | 0.99 | 1529   | 90    | 0 |
| BRA | Brazil | 8389 | Nova Era              | 0.41 | 0.80 | 0.99 | 7206   | 45    | 0 |
| BRA | Brazil | 8390 | Nova Lima             | 0.30 | 0.76 | 0.99 | 47358  | 3354  | 0 |
| BRA | Brazil | 8391 | Nova Modica           | 0.31 | 0.70 | 0.94 | 1868   | 392   | 0 |
| BRA | Brazil | 8392 | Nova Ponte            | 0.44 | 0.78 | 0.98 | 5503   | 313   | 0 |
| BRA | Brazil | 8393 | Nova Porteirinha      | 0.36 | 0.73 | 0.97 | 4356   | 681   | 0 |

|     |        |      |                       |      |      |      |       |       |      |
|-----|--------|------|-----------------------|------|------|------|-------|-------|------|
| BRA | Brazil | 8394 | Nova Resende          | 0.36 | 0.81 | 0.99 | 7306  | 0     | 0    |
| BRA | Brazil | 8395 | Nova Serrana          | 0.28 | 0.67 | 0.92 | 55876 | 13943 | 0    |
| BRA | Brazil | 8396 | Nova Uniao            | 0.56 | 0.90 | 1.00 | 1347  | 0     | 0    |
| BRA | Brazil | 8397 | Novo Cruzeiro         | 0.33 | 0.75 | 0.99 | 14967 | 1747  | 0    |
| BRA | Brazil | 8398 | Novo Oriente De Minas | 0.31 | 0.73 | 0.98 | 5301  | 788   | 0    |
| BRA | Brazil | 8399 | Novorizonte           | 0.31 | 0.72 | 0.98 | 2437  | 398   | 0    |
| BRA | Brazil | 8400 | Olaria                | 0.47 | 0.83 | 0.98 | 622   | 0     | 0    |
| BRA | Brazil | 8401 | Olhos-d'agua          | 0.31 | 0.72 | 0.98 | 2929  | 487   | 0    |
| BRA | Brazil | 8402 | Olimpio Noronha       | 0.36 | 0.77 | 0.99 | 1220  | 71    | 0    |
| BRA | Brazil | 8403 | Oliveira              | 0.27 | 0.71 | 0.96 | 22197 | 3817  | 0    |
| BRA | Brazil | 8404 | Oliveira Fortes       | 0.32 | 0.70 | 0.95 | 1050  | 224   | 0    |
| BRA | Brazil | 8405 | Onca De Pitangui      | 0.53 | 0.82 | 0.99 | 886   | 0     | 0    |
| BRA | Brazil | 8406 | Oratorios             | 0.38 | 0.78 | 0.99 | 1978  | 102   | 0    |
| BRA | Brazil | 8407 | Orizania              | 0.31 | 0.69 | 0.93 | 3911  | 899   | 0    |
| BRA | Brazil | 8408 | Ouro Branco           | 0.17 | 0.49 | 0.65 | 23538 | 11502 | 5616 |
| BRA | Brazil | 8409 | Ouro Fino             | 0.27 | 0.67 | 0.93 | 17913 | 4523  | 0    |
| BRA | Brazil | 8410 | Ouro Preto            | 0.31 | 0.78 | 1.00 | 36751 | 1674  | 0    |
| BRA | Brazil | 8411 | Ouro Verde De Minas   | 0.33 | 0.74 | 1.00 | 2860  | 353   | 0    |
| BRA | Brazil | 8412 | Padre Carvalho        | 0.41 | 0.78 | 0.99 | 2453  | 140   | 0    |
| BRA | Brazil | 8413 | Padre Paraiso         | 0.30 | 0.71 | 0.97 | 9665  | 1828  | 0    |
| BRA | Brazil | 8414 | Pai Pedro             | 0.31 | 0.71 | 0.98 | 3050  | 536   | 0    |
| BRA | Brazil | 8415 | Paineiras             | 0.48 | 0.78 | 0.95 | 1505  | 101   | 0    |
| BRA | Brazil | 8416 | Pains                 | 0.49 | 0.81 | 0.96 | 2642  | 0     | 0    |
| BRA | Brazil | 8417 | Paiva                 | 0.39 | 0.75 | 0.95 | 641   | 86    | 0    |
| BRA | Brazil | 8418 | Palma                 | 0.31 | 0.73 | 0.95 | 3318  | 485   | 0    |
| BRA | Brazil | 8419 | Palmopolis            | 0.45 | 0.85 | 0.99 | 2188  | 0     | 0    |
| BRA | Brazil | 8420 | Papagaios             | 0.38 | 0.81 | 0.99 | 6544  | 0     | 0    |
| BRA | Brazil | 8421 | Para De Minas         | 0.36 | 0.83 | 0.97 | 40877 | 0     | 0    |
| BRA | Brazil | 8422 | Paracatu              | 0.57 | 0.83 | 0.98 | 21493 | 0     | 0    |
| BRA | Brazil | 8423 | Paraguacu             | 0.36 | 0.76 | 0.98 | 9444  | 820   | 0    |
| BRA | Brazil | 8424 | Paraisopolis          | 0.29 | 0.69 | 0.94 | 10781 | 2390  | 0    |
| BRA | Brazil | 8425 | Paraopeba             | 0.42 | 0.80 | 0.98 | 9281  | 0     | 0    |
| BRA | Brazil | 8426 | Passa Quatro          | 0.29 | 0.69 | 0.95 | 8439  | 1871  | 0    |

|     |        |      |                         |      |      |      |       |      |   |
|-----|--------|------|-------------------------|------|------|------|-------|------|---|
| BRA | Brazil | 8427 | Passa Tempo             | 0.42 | 0.77 | 0.95 | 3202  | 216  | 0 |
| BRA | Brazil | 8428 | Passa Vinte             | 0.41 | 0.76 | 0.96 | 835   | 77   | 0 |
| BRA | Brazil | 8429 | Passabem                | 0.97 | 1.00 | 1.00 | 0     | 0    | 0 |
| BRA | Brazil | 8430 | Passos                  | 0.32 | 0.73 | 0.98 | 54921 | 8590 | 0 |
| BRA | Brazil | 8431 | Patis                   | 0.34 | 0.73 | 0.99 | 2787  | 394  | 0 |
| BRA | Brazil | 8432 | Patos De Minas          | 0.48 | 0.81 | 0.99 | 47940 | 0    | 0 |
| BRA | Brazil | 8433 | Patrocinio              | 0.39 | 0.77 | 0.99 | 36875 | 2461 | 0 |
| BRA | Brazil | 8434 | Patrocinio Do Muriae    | 0.32 | 0.72 | 0.97 | 2706  | 424  | 0 |
| BRA | Brazil | 8435 | Paula Candido           | 0.28 | 0.66 | 0.88 | 5004  | 1382 | 0 |
| BRA | Brazil | 8436 | Paulistas               | 0.53 | 0.85 | 1.00 | 1344  | 0    | 0 |
| BRA | Brazil | 8437 | Pavao                   | 0.30 | 0.65 | 0.84 | 4460  | 1358 | 0 |
| BRA | Brazil | 8438 | Pecanha                 | 0.31 | 0.73 | 0.98 | 8907  | 1346 | 0 |
| BRA | Brazil | 8439 | Pedra Azul              | 0.32 | 0.71 | 0.97 | 11979 | 2131 | 0 |
| BRA | Brazil | 8440 | Pedra Bonita            | 0.44 | 0.79 | 0.99 | 2368  | 58   | 0 |
| BRA | Brazil | 8441 | Pedra Do Anta           | 0.28 | 0.64 | 0.82 | 1690  | 541  | 0 |
| BRA | Brazil | 8442 | Pedra Do Indaia         | 0.40 | 0.77 | 0.95 | 1674  | 133  | 0 |
| BRA | Brazil | 8443 | Pedra Dourada           | 0.51 | 0.76 | 0.97 | 721   | 98   | 0 |
| BRA | Brazil | 8444 | Pedralva                | 0.31 | 0.74 | 0.97 | 5602  | 659  | 0 |
| BRA | Brazil | 8445 | Pedras De Maria Da Cruz | 0.33 | 0.73 | 0.99 | 5761  | 887  | 0 |
| BRA | Brazil | 8446 | Pedrinopolis            | 0.55 | 0.85 | 0.99 | 902   | 0    | 0 |
| BRA | Brazil | 8447 | Pedro Leopoldo          | 0.30 | 0.72 | 0.97 | 33054 | 5545 | 0 |
| BRA | Brazil | 8448 | Pedro Teixeira          | 0.30 | 0.72 | 0.98 | 913   | 149  | 0 |
| BRA | Brazil | 8449 | Pequeri                 | 0.35 | 0.77 | 0.98 | 1529  | 96   | 0 |
| BRA | Brazil | 8450 | Pequi                   | 0.46 | 0.80 | 0.97 | 1519  | 12   | 0 |
| BRA | Brazil | 8451 | Perdigao                | 0.35 | 0.74 | 0.98 | 5185  | 693  | 0 |
| BRA | Brazil | 8452 | Perdizes                | 0.35 | 0.73 | 0.96 | 7166  | 1054 | 0 |
| BRA | Brazil | 8453 | Perdoes                 | 0.39 | 0.74 | 0.97 | 8910  | 1221 | 0 |
| BRA | Brazil | 8454 | Periquito               | 0.32 | 0.70 | 0.95 | 3134  | 626  | 0 |
| BRA | Brazil | 8455 | Pescador                | 0.32 | 0.75 | 0.99 | 2087  | 210  | 0 |
| BRA | Brazil | 8456 | Piau                    | 0.32 | 0.70 | 0.93 | 1349  | 292  | 0 |
| BRA | Brazil | 8457 | Piedade De Caratinga    | 0.32 | 0.73 | 0.98 | 4253  | 591  | 0 |
| BRA | Brazil | 8458 | Piedade De Ponte Nova   | 0.34 | 0.73 | 0.98 | 1950  | 309  | 0 |
| BRA | Brazil | 8459 | Piedade Do Rio Grande   | 0.40 | 0.78 | 0.96 | 1861  | 113  | 0 |

|     |        |      |                      |      |      |      |       |       |     |
|-----|--------|------|----------------------|------|------|------|-------|-------|-----|
| BRA | Brazil | 8460 | Piedade Dos Gerais   | 0.29 | 0.70 | 0.95 | 2538  | 487   | 0   |
| BRA | Brazil | 8461 | Pimenta              | 0.38 | 0.81 | 0.97 | 3685  | 0     | 0   |
| BRA | Brazil | 8462 | Pingo D'agua         | 0.33 | 0.72 | 0.97 | 2217  | 359   | 0   |
| BRA | Brazil | 8463 | Pintopolis           | 0.42 | 0.78 | 0.99 | 2917  | 124   | 0   |
| BRA | Brazil | 8464 | Piracema             | 0.45 | 0.78 | 0.96 | 2287  | 110   | 0   |
| BRA | Brazil | 8465 | Pirajuba             | 0.40 | 0.75 | 0.97 | 2524  | 332   | 0   |
| BRA | Brazil | 8466 | Piranga              | 0.41 | 0.72 | 0.96 | 6932  | 1344  | 0   |
| BRA | Brazil | 8467 | Pirangucu            | 0.28 | 0.67 | 0.93 | 2985  | 728   | 0   |
| BRA | Brazil | 8468 | Piranguinho          | 0.39 | 0.80 | 1.00 | 3168  | 0     | 0   |
| BRA | Brazil | 8469 | Pirapetinga          | 0.30 | 0.71 | 0.98 | 5320  | 918   | 0   |
| BRA | Brazil | 8470 | Pirapora             | 0.46 | 0.79 | 1.00 | 18974 | 313   | 0   |
| BRA | Brazil | 8471 | Pirauba              | 0.31 | 0.68 | 0.93 | 5600  | 1401  | 0   |
| BRA | Brazil | 8472 | Pitangui             | 0.38 | 0.79 | 0.99 | 11683 | 320   | 0   |
| BRA | Brazil | 8473 | Piui                 | 0.39 | 0.77 | 0.99 | 14288 | 1123  | 0   |
| BRA | Brazil | 8474 | Planura              | 0.42 | 0.77 | 0.98 | 4603  | 365   | 0   |
| BRA | Brazil | 8475 | Poco Fundo           | 0.28 | 0.69 | 0.94 | 8812  | 1932  | 0   |
| BRA | Brazil | 8476 | Pocos De Caldas      | 0.29 | 0.70 | 0.96 | 85444 | 16055 | 0   |
| BRA | Brazil | 8477 | Pocrane              | 0.29 | 0.68 | 0.93 | 4614  | 1080  | 0   |
| BRA | Brazil | 8478 | Pompeu               | 0.37 | 0.80 | 0.99 | 13610 | 18    | 0   |
| BRA | Brazil | 8479 | Ponte Nova           | 0.29 | 0.71 | 0.96 | 30566 | 5409  | 0   |
| BRA | Brazil | 8480 | Ponto Chique         | 0.69 | 0.85 | 0.98 | 484   | 0     | 0   |
| BRA | Brazil | 8481 | Ponto Dos Volantes   | 0.35 | 0.77 | 0.99 | 5504  | 424   | 0   |
| BRA | Brazil | 8482 | Porteirinha          | 0.37 | 0.78 | 0.99 | 16483 | 743   | 0   |
| BRA | Brazil | 8483 | Porto Firme          | 0.27 | 0.65 | 0.90 | 6017  | 1648  | 0   |
| BRA | Brazil | 8484 | Pote                 | 0.30 | 0.70 | 0.96 | 8441  | 1660  | 0   |
| BRA | Brazil | 8485 | Pouso Alegre         | 0.27 | 0.69 | 0.96 | 78927 | 16433 | 0   |
| BRA | Brazil | 8486 | Pouso Alto           | 0.37 | 0.71 | 0.95 | 2733  | 568   | 0   |
| BRA | Brazil | 8487 | Prados               | 0.38 | 0.75 | 0.96 | 3839  | 476   | 0   |
| BRA | Brazil | 8488 | Prata                | 0.40 | 0.78 | 0.99 | 11132 | 428   | 0   |
| BRA | Brazil | 8489 | Pratapolis           | 0.28 | 0.69 | 0.96 | 4584  | 943   | 0   |
| BRA | Brazil | 8490 | Pratinha             | 0.36 | 0.70 | 0.95 | 1586  | 342   | 0   |
| BRA | Brazil | 8491 | Presidente Bernardes | 0.80 | 0.99 | 1.00 | 1     | 0     | 0   |
| BRA | Brazil | 8492 | Presidente Juscelino | 0.17 | 0.49 | 0.65 | 2375  | 1160  | 567 |

|     |        |      |                       |      |      |      |        |       |   |
|-----|--------|------|-----------------------|------|------|------|--------|-------|---|
| BRA | Brazil | 8493 | Presidente Kubitschek | 0.43 | 0.84 | 1.00 | 1139   | 0     | 0 |
| BRA | Brazil | 8494 | Presidente Olegario   | 0.41 | 0.74 | 0.95 | 7934   | 1226  | 0 |
| BRA | Brazil | 8495 | Prudente De Morais    | 0.35 | 0.77 | 0.98 | 4656   | 324   | 0 |
| BRA | Brazil | 8496 | Quartel Geral         | 0.40 | 0.75 | 0.96 | 1424   | 178   | 0 |
| BRA | Brazil | 8497 | Queluzita             | 0.52 | 0.76 | 0.94 | 564    | 87    | 0 |
| BRA | Brazil | 8498 | Raposos               | 0.29 | 0.74 | 0.97 | 8354   | 1050  | 0 |
| BRA | Brazil | 8499 | Raul Soares           | 0.30 | 0.71 | 0.95 | 12110  | 2233  | 0 |
| BRA | Brazil | 8500 | Recreio               | 0.28 | 0.72 | 0.95 | 5542   | 877   | 0 |
| BRA | Brazil | 8501 | Reduto                | 0.30 | 0.69 | 0.93 | 3635   | 818   | 0 |
| BRA | Brazil | 8502 | Resende Costa         | 0.51 | 0.80 | 0.98 | 3337   | 44    | 0 |
| BRA | Brazil | 8503 | Resplendor            | 0.30 | 0.77 | 0.99 | 8800   | 603   | 0 |
| BRA | Brazil | 8504 | Ressaquinha           | 0.62 | 0.81 | 0.96 | 902    | 0     | 0 |
| BRA | Brazil | 8505 | Riachinho             | 0.79 | 0.93 | 1.00 | 53     | 0     | 0 |
| BRA | Brazil | 8506 | Riacho Dos Machados   | 0.49 | 0.83 | 0.99 | 3051   | 0     | 0 |
| BRA | Brazil | 8507 | Ribeirao Das Neves    | 0.30 | 0.72 | 0.99 | 161839 | 24871 | 0 |
| BRA | Brazil | 8508 | Ribeirao Vermelho     | 0.71 | 0.86 | 0.98 | 311    | 0     | 0 |
| BRA | Brazil | 8509 | Rio Acima             | 0.34 | 0.81 | 0.99 | 4759   | 0     | 0 |
| BRA | Brazil | 8510 | Rio Casca             | 0.36 | 0.76 | 0.99 | 6189   | 506   | 0 |
| BRA | Brazil | 8511 | Rio Do Prado          | 0.47 | 0.82 | 0.99 | 1759   | 0     | 0 |
| BRA | Brazil | 8512 | Rio Doce              | 0.31 | 0.69 | 0.93 | 1287   | 289   | 0 |
| BRA | Brazil | 8513 | Rio Espera            | 0.46 | 0.75 | 0.94 | 2007   | 314   | 0 |
| BRA | Brazil | 8514 | Rio Manso             | 0.37 | 0.72 | 0.93 | 2521   | 454   | 0 |
| BRA | Brazil | 8515 | Rio Novo              | 0.30 | 0.73 | 0.98 | 4535   | 592   | 0 |
| BRA | Brazil | 8516 | Rio Paranaiba         | 0.36 | 0.74 | 0.96 | 5746   | 788   | 0 |
| BRA | Brazil | 8517 | Rio Pardo De Minas    | 0.30 | 0.71 | 0.97 | 15643  | 2859  | 0 |
| BRA | Brazil | 8518 | Rio Piracicaba        | 0.29 | 0.70 | 0.96 | 7311   | 1428  | 0 |
| BRA | Brazil | 8519 | Rio Pomba             | 0.26 | 0.63 | 0.86 | 9783   | 2992  | 0 |
| BRA | Brazil | 8520 | Rio Preto             | 0.40 | 0.77 | 0.99 | 1909   | 140   | 0 |
| BRA | Brazil | 8521 | Rio Vermelho          | 0.32 | 0.73 | 0.98 | 6456   | 944   | 0 |
| BRA | Brazil | 8522 | Ritapolis             | 0.49 | 0.78 | 0.96 | 1489   | 103   | 0 |
| BRA | Brazil | 8523 | Rochedo De Minas      | 0.33 | 0.73 | 0.98 | 1080   | 162   | 0 |
| BRA | Brazil | 8524 | Rodeiro               | 0.39 | 0.76 | 0.95 | 3161   | 296   | 0 |
| BRA | Brazil | 8525 | Romaria               | 0.60 | 0.83 | 0.97 | 742    | 0     | 0 |

|     |        |      |                              |      |      |      |        |       |       |
|-----|--------|------|------------------------------|------|------|------|--------|-------|-------|
| BRA | Brazil | 8526 | Rosario Da Limeira           | 0.37 | 0.73 | 0.97 | 1957   | 321   | 0     |
| BRA | Brazil | 8527 | Rubelita                     | 0.31 | 0.69 | 0.91 | 3439   | 804   | 0     |
| BRA | Brazil | 8528 | Rubim                        | 0.34 | 0.75 | 0.98 | 4779   | 508   | 0     |
| BRA | Brazil | 8529 | Sabara                       | 0.29 | 0.71 | 0.97 | 73671  | 12305 | 0     |
| BRA | Brazil | 8530 | Sabinopolis                  | 0.49 | 0.84 | 1.00 | 4927   | 0     | 0     |
| BRA | Brazil | 8531 | Sacramento                   | 0.33 | 0.76 | 0.97 | 12195  | 1147  | 0     |
| BRA | Brazil | 8532 | Salinas                      | 0.32 | 0.73 | 0.99 | 20208  | 2998  | 0     |
| BRA | Brazil | 8533 | Salto Da Divisa              | 0.43 | 0.77 | 0.99 | 2610   | 206   | 0     |
| BRA | Brazil | 8534 | Santa Barbara                | 0.17 | 0.49 | 0.65 | 19816  | 9683  | 4728  |
| BRA | Brazil | 8535 | Santa Barbara Do Leste       | 0.37 | 0.77 | 1.00 | 3518   | 268   | 0     |
| BRA | Brazil | 8536 | Santa Barbara Do Monte Verde | 0.27 | 0.68 | 0.94 | 1644   | 386   | 0     |
| BRA | Brazil | 8537 | Santa Barbara Do Tugurio     | 0.62 | 0.83 | 0.98 | 704    | 0     | 0     |
| BRA | Brazil | 8538 | Santa Cruz De Minas          | 0.38 | 0.80 | 1.00 | 2726   | 0     | 0     |
| BRA | Brazil | 8539 | Santa Cruz De Salinas        | 0.40 | 0.81 | 1.00 | 1618   | 0     | 0     |
| BRA | Brazil | 8540 | Santa Cruz Do Escalvado      | 0.37 | 0.80 | 0.96 | 2117   | 0     | 0     |
| BRA | Brazil | 8541 | Santa Efigenia De Minas      | 0.39 | 0.78 | 1.00 | 1931   | 81    | 0     |
| BRA | Brazil | 8542 | Santa Fe De Minas            | 0.68 | 0.86 | 0.99 | 485    | 0     | 0     |
| BRA | Brazil | 8543 | Santa Helena De Minas        | 0.35 | 0.78 | 1.00 | 2878   | 132   | 0     |
| BRA | Brazil | 8544 | Santa Juliana                | 0.36 | 0.78 | 0.98 | 6051   | 333   | 0     |
| BRA | Brazil | 8545 | Santa Luzia                  | 0.17 | 0.49 | 0.65 | 130973 | 63998 | 31247 |
| BRA | Brazil | 8546 | Santa Margarida              | 0.49 | 0.80 | 0.99 | 5055   | 0     | 0     |
| BRA | Brazil | 8547 | Santa Maria De Itabira       | 0.39 | 0.78 | 0.99 | 4417   | 200   | 0     |
| BRA | Brazil | 8548 | Santa Maria Do Salto         | 0.48 | 0.76 | 0.96 | 1751   | 214   | 0     |
| BRA | Brazil | 8549 | Santa Maria Do Suacui        | 0.34 | 0.78 | 0.99 | 6887   | 350   | 0     |
| BRA | Brazil | 8550 | Santa Rita De Caldas         | 0.38 | 0.77 | 0.97 | 3844   | 315   | 0     |
| BRA | Brazil | 8551 | Santa Rita De Ibitipoca      | 0.50 | 0.75 | 0.96 | 1083   | 168   | 0     |
| BRA | Brazil | 8552 | Santa Rita De Jacutinga      | 0.39 | 0.75 | 0.97 | 2056   | 266   | 0     |
| BRA | Brazil | 8553 | Santa Rita De Minas          | 0.32 | 0.71 | 0.95 | 3582   | 694   | 0     |
| BRA | Brazil | 8554 | Santa Rita Do Itueto         | 0.34 | 0.75 | 0.99 | 2651   | 312   | 0     |
| BRA | Brazil | 8555 | Santa Rita Do Sapucaí        | 0.35 | 0.76 | 0.98 | 19457  | 1836  | 0     |
| BRA | Brazil | 8556 | Santa Rosa Da Serra          | 0.32 | 0.71 | 0.95 | 1630   | 308   | 0     |
| BRA | Brazil | 8557 | Santa Vitoria                | 0.40 | 0.76 | 0.96 | 7931   | 847   | 0     |
| BRA | Brazil | 8558 | Santana Da Vargem            | 0.39 | 0.77 | 0.98 | 3017   | 226   | 0     |

|     |        |      |                              |      |      |      |       |      |   |
|-----|--------|------|------------------------------|------|------|------|-------|------|---|
| BRA | Brazil | 8559 | Santana De Cataguases        | 0.52 | 0.79 | 0.96 | 1080  | 40   | 0 |
| BRA | Brazil | 8560 | Santana De Pirapama          | 0.44 | 0.80 | 0.98 | 2732  | 0    | 0 |
| BRA | Brazil | 8561 | Santana Do Deserto           | 0.30 | 0.71 | 0.97 | 2358  | 420  | 0 |
| BRA | Brazil | 8562 | Santana Do Garambeu          | 0.28 | 0.64 | 0.85 | 1273  | 390  | 0 |
| BRA | Brazil | 8563 | Santana Do Jacare            | 0.33 | 0.72 | 0.96 | 1892  | 303  | 0 |
| BRA | Brazil | 8564 | Santana Do Manhuacu          | 0.29 | 0.65 | 0.86 | 4540  | 1311 | 0 |
| BRA | Brazil | 8565 | Santana Do Paraiso           | 0.27 | 0.68 | 0.95 | 19547 | 4562 | 0 |
| BRA | Brazil | 8566 | Santana Do Riacho            | 0.43 | 0.78 | 0.98 | 1544  | 94   | 0 |
| BRA | Brazil | 8567 | Santana Dos Montes           | 0.45 | 0.74 | 0.96 | 1393  | 253  | 0 |
| BRA | Brazil | 8568 | Santo Antonio Do Amparo      | 0.30 | 0.73 | 0.97 | 9192  | 1311 | 0 |
| BRA | Brazil | 8569 | Santo Antonio Do Aventureiro | 0.34 | 0.69 | 0.94 | 1660  | 398  | 0 |
| BRA | Brazil | 8570 | Santo Antonio Do Grama       | 0.35 | 0.75 | 0.98 | 1837  | 194  | 0 |
| BRA | Brazil | 8571 | Santo Antonio Do Itambe      | 0.55 | 0.86 | 0.99 | 1007  | 0    | 0 |
| BRA | Brazil | 8572 | Santo Antonio Do Jacinto     | 0.44 | 0.79 | 1.00 | 3936  | 80   | 0 |
| BRA | Brazil | 8573 | Santo Antonio Do Monte       | 0.31 | 0.76 | 0.99 | 13875 | 1021 | 0 |
| BRA | Brazil | 8574 | Santo Antonio Do Retiro      | 0.44 | 0.82 | 1.00 | 2624  | 0    | 0 |
| BRA | Brazil | 8575 | Santo Antonio Do Rio Abaixo  | 0.37 | 0.72 | 0.97 | 765   | 142  | 0 |
| BRA | Brazil | 8576 | Santo Hipolito               | 0.36 | 0.75 | 0.97 | 1418  | 161  | 0 |
| BRA | Brazil | 8577 | Santos Dumont                | 0.32 | 0.72 | 0.97 | 22810 | 3823 | 0 |
| BRA | Brazil | 8578 | Sao Bento Abade              | 0.67 | 0.85 | 0.99 | 691   | 0    | 0 |
| BRA | Brazil | 8579 | Sao Bras Do Suacui           | 0.39 | 0.76 | 0.96 | 1602  | 157  | 0 |
| BRA | Brazil | 8580 | Sao Domingos Das Dores       | 0.39 | 0.80 | 1.00 | 2296  | 0    | 0 |
| BRA | Brazil | 8581 | Sao Domingos Do Prata        | 0.30 | 0.77 | 1.00 | 8870  | 449  | 0 |
| BRA | Brazil | 8582 | Sao Felix De Minas           | 0.41 | 0.83 | 0.99 | 1358  | 0    | 0 |
| BRA | Brazil | 8583 | Sao Francisco                | 0.37 | 0.81 | 1.00 | 24331 | 0    | 0 |
| BRA | Brazil | 8584 | Sao Francisco De Paula       | 0.98 | 0.99 | 1.00 | 0     | 0    | 0 |
| BRA | Brazil | 8585 | Sao Francisco De Sales       | 0.39 | 0.76 | 0.97 | 2542  | 281  | 0 |
| BRA | Brazil | 8586 | Sao Francisco Do Gloria      | 0.36 | 0.69 | 0.91 | 2495  | 624  | 0 |
| BRA | Brazil | 8587 | Sao Geraldo                  | 0.25 | 0.65 | 0.90 | 6895  | 1883 | 0 |
| BRA | Brazil | 8588 | Sao Geraldo Da Piedade       | 0.35 | 0.77 | 0.99 | 1969  | 120  | 0 |
| BRA | Brazil | 8589 | Sao Geraldo Do Baixio        | 0.34 | 0.70 | 0.93 | 1809  | 409  | 0 |
| BRA | Brazil | 8590 | Sao Goncalo Do Abaete        | 0.43 | 0.74 | 0.95 | 3085  | 492  | 0 |
| BRA | Brazil | 8591 | Sao Goncalo Do Para          | 0.29 | 0.73 | 0.97 | 6243  | 811  | 0 |



|     |        |      |                            |      |      |      |       |      |      |
|-----|--------|------|----------------------------|------|------|------|-------|------|------|
| BRA | Brazil | 8592 | Sao Goncalo Do Rio Abaixo  | 0.34 | 0.76 | 0.99 | 5124  | 401  | 0    |
| BRA | Brazil | 8593 | Sao Goncalo Do Rio Preto   | 0.54 | 0.82 | 0.99 | 818   | 0    | 0    |
| BRA | Brazil | 8594 | Sao Goncalo Do Sapucaí     | 0.39 | 0.75 | 0.99 | 10361 | 1287 | 0    |
| BRA | Brazil | 8595 | Sao Gotardo                | 0.41 | 0.79 | 1.00 | 13295 | 236  | 0    |
| BRA | Brazil | 8596 | Sao Joao Batista Do Gloria | 0.44 | 0.80 | 0.97 | 2729  | 0    | 0    |
| BRA | Brazil | 8597 | Sao Joao Da Lagoa          | 0.39 | 0.81 | 0.98 | 2036  | 0    | 0    |
| BRA | Brazil | 8598 | Sao Joao Da Mata           | 0.41 | 0.73 | 0.97 | 1088  | 200  | 0    |
| BRA | Brazil | 8599 | Sao Joao Da Ponte          | 0.41 | 0.81 | 1.00 | 10040 | 0    | 0    |
| BRA | Brazil | 8600 | Sao Joao Das Missoes       | 0.35 | 0.84 | 1.00 | 5473  | 0    | 0    |
| BRA | Brazil | 8601 | Sao Joao Del Rei           | 0.28 | 0.71 | 0.96 | 47967 | 8715 | 0    |
| BRA | Brazil | 8602 | Sao Joao Do Manhuacu       | 0.37 | 0.76 | 0.98 | 4945  | 498  | 0    |
| BRA | Brazil | 8603 | Sao Joao Do Manteninha     | 0.33 | 0.75 | 1.00 | 2570  | 257  | 0    |
| BRA | Brazil | 8604 | Sao Joao Do Oriente        | 0.34 | 0.79 | 1.00 | 3569  | 67   | 0    |
| BRA | Brazil | 8605 | Sao Joao Do Pacuí          | 0.48 | 0.82 | 0.98 | 1400  | 0    | 0    |
| BRA | Brazil | 8606 | Sao Joao Do Paraíso        | 0.17 | 0.49 | 0.65 | 14954 | 7307 | 3568 |
| BRA | Brazil | 8607 | Sao Joao Evangelista       | 0.30 | 0.74 | 0.99 | 8021  | 989  | 0    |
| BRA | Brazil | 8608 | Sao Joao Nepomuceno        | 0.30 | 0.71 | 0.96 | 13265 | 2294 | 0    |
| BRA | Brazil | 8609 | Sao Joaquim De Bicas       | 0.28 | 0.70 | 0.97 | 17431 | 3253 | 0    |
| BRA | Brazil | 8610 | Sao Jose Da Barra          | 0.48 | 0.79 | 0.98 | 2270  | 72   | 0    |
| BRA | Brazil | 8611 | Sao Jose Da Lapa           | 0.30 | 0.73 | 0.99 | 12212 | 1778 | 0    |
| BRA | Brazil | 8612 | Sao Jose Da Safira         | 0.33 | 0.76 | 1.00 | 1949  | 179  | 0    |
| BRA | Brazil | 8613 | Sao Jose Da Varginha       | 0.27 | 0.77 | 0.96 | 2636  | 175  | 0    |
| BRA | Brazil | 8614 | Sao Jose Do Alegre         | 0.29 | 0.69 | 0.95 | 2266  | 501  | 0    |
| BRA | Brazil | 8615 | Sao Jose Do Divino         | 0.31 | 0.71 | 0.96 | 1929  | 345  | 0    |
| BRA | Brazil | 8616 | Sao Jose Do Goiabal        | 0.37 | 0.80 | 0.99 | 2378  | 17   | 0    |
| BRA | Brazil | 8617 | Sao Jose Do Jacuri         | 0.31 | 0.74 | 0.99 | 3260  | 383  | 0    |
| BRA | Brazil | 8618 | Sao Jose Do Mantimento     | 0.33 | 0.72 | 0.98 | 1282  | 230  | 0    |
| BRA | Brazil | 8619 | Sao Lourenco               | 0.28 | 0.70 | 0.96 | 23330 | 4500 | 0    |
| BRA | Brazil | 8620 | Sao Miguel Do Anta         | 0.29 | 0.72 | 0.97 | 3601  | 565  | 0    |
| BRA | Brazil | 8621 | Sao Pedro Da Uniao         | 0.33 | 0.76 | 0.96 | 2328  | 201  | 0    |
| BRA | Brazil | 8622 | Sao Pedro Do Suacuí        | 0.28 | 0.68 | 0.94 | 2850  | 651  | 0    |
| BRA | Brazil | 8623 | Sao Pedro Dos Ferros       | 0.29 | 0.69 | 0.96 | 4262  | 883  | 0    |
| BRA | Brazil | 8624 | Sao Romao                  | 0.35 | 0.72 | 0.97 | 5416  | 932  | 0    |

|     |        |      |                                |      |      |      |       |      |    |
|-----|--------|------|--------------------------------|------|------|------|-------|------|----|
| BRA | Brazil | 8625 | Sao Roque De Minas             | 0.28 | 0.68 | 0.94 | 3852  | 859  | 0  |
| BRA | Brazil | 8626 | Sao Sebastiao Da Bela Vista    | 0.36 | 0.71 | 0.97 | 2378  | 465  | 0  |
| BRA | Brazil | 8627 | Sao Sebastiao Da Vargem Alegre | 0.47 | 0.79 | 0.98 | 959   | 17   | 0  |
| BRA | Brazil | 8628 | Sao Sebastiao Do Anta          | 0.31 | 0.71 | 0.97 | 3201  | 578  | 0  |
| BRA | Brazil | 8629 | Sao Sebastiao Do Maranhao      | 0.27 | 0.61 | 0.79 | 5537  | 1963 | 73 |
| BRA | Brazil | 8630 | Sao Sebastiao Do Oeste         | 0.40 | 0.81 | 0.98 | 2698  | 0    | 0  |
| BRA | Brazil | 8631 | Sao Sebastiao Do Paraiso       | 0.32 | 0.76 | 0.99 | 33828 | 3123 | 0  |
| BRA | Brazil | 8632 | Sao Sebastiao Do Rio Preto     | 0.45 | 0.79 | 0.96 | 549   | 11   | 0  |
| BRA | Brazil | 8633 | Sao Sebastiao Do Rio Verde     | 0.35 | 0.72 | 0.96 | 958   | 175  | 0  |
| BRA | Brazil | 8634 | Sao Thome Das Letras           | 0.35 | 0.74 | 0.97 | 3184  | 430  | 0  |
| BRA | Brazil | 8635 | Sao Tiago                      | 0.50 | 0.80 | 0.96 | 3286  | 53   | 0  |
| BRA | Brazil | 8636 | Sao Tomas De Aquino            | 0.40 | 0.84 | 1.00 | 2871  | 0    | 0  |
| BRA | Brazil | 8637 | Sao Vicente De Minas           | 0.28 | 0.68 | 0.93 | 3979  | 953  | 0  |
| BRA | Brazil | 8638 | Sapucaí-mirim                  | 0.50 | 0.79 | 0.98 | 2109  | 100  | 0  |
| BRA | Brazil | 8639 | Sardoa                         | 0.37 | 0.78 | 1.00 | 2608  | 122  | 0  |
| BRA | Brazil | 8640 | Sarzedo                        | 0.31 | 0.77 | 1.00 | 15364 | 970  | 0  |
| BRA | Brazil | 8641 | Sem-peixe                      | 0.27 | 0.69 | 0.94 | 1468  | 318  | 0  |
| BRA | Brazil | 8642 | Senador Amaral                 | 0.52 | 0.79 | 1.00 | 1523  | 43   | 0  |
| BRA | Brazil | 8643 | Senador Cortes                 | 0.31 | 0.66 | 0.85 | 991   | 289  | 0  |
| BRA | Brazil | 8644 | Senador Firmino                | 0.40 | 0.76 | 0.97 | 3076  | 301  | 0  |
| BRA | Brazil | 8645 | Senador Jose Bento             | 0.28 | 0.68 | 0.95 | 904   | 204  | 0  |
| BRA | Brazil | 8646 | Senador Modestino Goncalves    | 0.66 | 0.86 | 0.98 | 640   | 0    | 0  |
| BRA | Brazil | 8647 | Senhora De Oliveira            | 0.76 | 0.88 | 0.98 | 256   | 0    | 0  |
| BRA | Brazil | 8648 | Senhora Do Porto               | 0.35 | 0.77 | 0.98 | 1625  | 102  | 0  |
| BRA | Brazil | 8649 | Senhora Dos Remedios           | 0.45 | 0.74 | 0.96 | 3689  | 617  | 0  |
| BRA | Brazil | 8650 | Sericita                       | 0.33 | 0.73 | 0.99 | 3466  | 508  | 0  |
| BRA | Brazil | 8651 | Seritinga                      | 0.45 | 0.76 | 0.97 | 658   | 77   | 0  |
| BRA | Brazil | 8652 | Serra Azul De Minas            | 0.37 | 0.80 | 1.00 | 1889  | 0    | 0  |
| BRA | Brazil | 8653 | Serra Da Saudade               | 0.44 | 0.76 | 0.94 | 297   | 33   | 0  |
| BRA | Brazil | 8654 | Serra Do Salitre               | 0.33 | 0.74 | 0.98 | 5489  | 749  | 0  |
| BRA | Brazil | 8655 | Serra Dos Aimores              | 0.31 | 0.75 | 0.99 | 4116  | 419  | 0  |
| BRA | Brazil | 8656 | Serrania                       | 0.42 | 0.82 | 0.99 | 2963  | 0    | 0  |
| BRA | Brazil | 8657 | Serranopolis De Minas          | 0.47 | 0.81 | 0.98 | 1583  | 0    | 0  |

|     |        |      |                    |      |      |      |        |       |   |
|-----|--------|------|--------------------|------|------|------|--------|-------|---|
| BRA | Brazil | 8658 | Serranos           | 0.44 | 0.77 | 0.97 | 733    | 67    | 0 |
| BRA | Brazil | 8659 | Serro              | 0.43 | 0.83 | 0.99 | 7950   | 0     | 0 |
| BRA | Brazil | 8660 | Sete Lagoas        | 0.30 | 0.75 | 0.98 | 118700 | 11913 | 0 |
| BRA | Brazil | 8661 | Setubinha          | 0.36 | 0.74 | 0.98 | 3674   | 523   | 0 |
| BRA | Brazil | 8662 | Silveirania        | 0.47 | 0.78 | 0.96 | 765    | 36    | 0 |
| BRA | Brazil | 8663 | Silvianopolis      | 0.30 | 0.67 | 0.93 | 3768   | 991   | 0 |
| BRA | Brazil | 8664 | Simao Pereira      | 0.31 | 0.73 | 0.98 | 1378   | 191   | 0 |
| BRA | Brazil | 8665 | Simonesia          | 0.31 | 0.68 | 0.89 | 9515   | 2367  | 0 |
| BRA | Brazil | 8666 | Sobralia           | 0.32 | 0.75 | 0.99 | 2830   | 287   | 0 |
| BRA | Brazil | 8667 | Soledade De Minas  | 0.27 | 0.64 | 0.87 | 3326   | 985   | 0 |
| BRA | Brazil | 8668 | Tabuleiro          | 0.28 | 0.68 | 0.94 | 2080   | 478   | 0 |
| BRA | Brazil | 8669 | Taiobeiras         | 0.32 | 0.72 | 0.97 | 16252  | 2657  | 0 |
| BRA | Brazil | 8670 | Taparuba           | 0.34 | 0.73 | 0.98 | 1450   | 218   | 0 |
| BRA | Brazil | 8671 | Tapira             | 0.57 | 0.92 | 1.00 | 1084   | 0     | 0 |
| BRA | Brazil | 8672 | Tapirai            | 0.98 | 0.98 | 0.98 | 0      | 0     | 0 |
| BRA | Brazil | 8673 | Taquaracu De Minas | 0.39 | 0.74 | 0.95 | 1713   | 268   | 0 |
| BRA | Brazil | 8674 | Tarumirim          | 0.29 | 0.70 | 0.97 | 7584   | 1423  | 0 |
| BRA | Brazil | 8675 | Teixeiras          | 0.27 | 0.65 | 0.89 | 6265   | 1756  | 0 |
| BRA | Brazil | 8676 | Teofilo Otoni      | 0.32 | 0.77 | 0.99 | 67642  | 3701  | 0 |
| BRA | Brazil | 8677 | Timoteo            | 0.29 | 0.71 | 0.96 | 49479  | 8549  | 0 |
| BRA | Brazil | 8678 | Tiradentes         | 0.40 | 0.70 | 0.93 | 3134   | 749   | 0 |
| BRA | Brazil | 8679 | Tiros              | 0.38 | 0.78 | 0.98 | 2848   | 139   | 0 |
| BRA | Brazil | 8680 | Tocantins          | 0.37 | 0.74 | 0.97 | 7367   | 1024  | 0 |
| BRA | Brazil | 8681 | Tocos Do Moji      | 0.44 | 0.74 | 0.95 | 1480   | 258   | 0 |
| BRA | Brazil | 8682 | Toledo             | 1.00 | 1.00 | 1.00 | 0      | 0     | 0 |
| BRA | Brazil | 8683 | Tombos             | 0.28 | 0.67 | 0.91 | 4615   | 1179  | 0 |
| BRA | Brazil | 8684 | Tres Coracoes      | 0.29 | 0.73 | 0.98 | 39999  | 5931  | 0 |
| BRA | Brazil | 8685 | Tres Marias        | 0.48 | 0.78 | 0.97 | 10384  | 637   | 0 |
| BRA | Brazil | 8686 | Tres Pontas        | 0.33 | 0.77 | 0.98 | 26902  | 1710  | 0 |
| BRA | Brazil | 8687 | Tumiritinga        | 0.31 | 0.74 | 0.99 | 3357   | 401   | 0 |
| BRA | Brazil | 8688 | Tupaciguara        | 0.48 | 0.78 | 0.97 | 8216   | 520   | 0 |
| BRA | Brazil | 8689 | Turmalina          | 0.35 | 0.82 | 1.00 | 8627   | 0     | 0 |
| BRA | Brazil | 8690 | Turvolandia        | 0.53 | 0.78 | 0.98 | 1343   | 88    | 0 |

|     |        |      |                            |      |      |      |        |       |       |
|-----|--------|------|----------------------------|------|------|------|--------|-------|-------|
| BRA | Brazil | 8691 | Uba                        | 0.51 | 0.80 | 0.99 | 32725  | 0     | 0     |
| BRA | Brazil | 8692 | Ubai                       | 0.40 | 0.79 | 1.00 | 5044   | 170   | 0     |
| BRA | Brazil | 8693 | Ubaporanga                 | 0.29 | 0.68 | 0.93 | 6391   | 1453  | 0     |
| BRA | Brazil | 8694 | Uberaba                    | 0.40 | 0.77 | 0.97 | 133358 | 11075 | 0     |
| BRA | Brazil | 8695 | Uberlandia                 | 0.35 | 0.79 | 0.99 | 308254 | 6309  | 0     |
| BRA | Brazil | 8696 | Umburatiba                 | 0.42 | 0.85 | 1.00 | 858    | 0     | 0     |
| BRA | Brazil | 8697 | Unai                       | 0.62 | 0.84 | 0.98 | 15329  | 0     | 0     |
| BRA | Brazil | 8698 | Uniao De Minas             | 0.50 | 0.85 | 0.99 | 1341   | 0     | 0     |
| BRA | Brazil | 8699 | Uruana De Minas            | 0.70 | 0.88 | 1.00 | 327    | 0     | 0     |
| BRA | Brazil | 8700 | Urucania                   | 0.38 | 0.78 | 0.99 | 4430   | 211   | 0     |
| BRA | Brazil | 8701 | Urucuia                    | 0.34 | 0.72 | 0.95 | 7399   | 1228  | 0     |
| BRA | Brazil | 8702 | Vargem Alegre              | 0.34 | 0.77 | 1.00 | 3054   | 203   | 0     |
| BRA | Brazil | 8703 | Vargem Bonita              | 0.49 | 0.81 | 0.99 | 584    | 0     | 0     |
| BRA | Brazil | 8704 | Vargem Grande Do Rio Pardo | 0.51 | 0.85 | 0.99 | 1498   | 0     | 0     |
| BRA | Brazil | 8705 | Varginha                   | 0.30 | 0.72 | 0.96 | 66994  | 10831 | 0     |
| BRA | Brazil | 8706 | Varjao De Minas            | 0.50 | 0.84 | 1.00 | 1851   | 0     | 0     |
| BRA | Brazil | 8707 | Varzea Da Palma            | 0.50 | 0.82 | 0.99 | 11516  | 0     | 0     |
| BRA | Brazil | 8708 | Varzelandia                | 0.39 | 0.79 | 1.00 | 8022   | 208   | 0     |
| BRA | Brazil | 8709 | Vazante                    | 0.49 | 0.79 | 0.97 | 6431   | 249   | 0     |
| BRA | Brazil | 8710 | Verdelandia                | 0.41 | 0.77 | 0.99 | 3824   | 248   | 0     |
| BRA | Brazil | 8711 | Veredinha                  | 0.40 | 0.75 | 0.96 | 2366   | 322   | 0     |
| BRA | Brazil | 8712 | Verissimo                  | 0.38 | 0.72 | 0.96 | 1688   | 340   | 0     |
| BRA | Brazil | 8713 | Vermelho Novo              | 0.37 | 0.80 | 0.99 | 2103   | 0     | 0     |
| BRA | Brazil | 8714 | Vespasiano                 | 0.30 | 0.71 | 0.98 | 59266  | 10694 | 0     |
| BRA | Brazil | 8715 | Vicosa                     | 0.17 | 0.49 | 0.65 | 49472  | 24174 | 11803 |
| BRA | Brazil | 8716 | Vieiras                    | 0.28 | 0.68 | 0.94 | 1899   | 437   | 0     |
| BRA | Brazil | 8717 | Virgem Da Lapa             | 0.30 | 0.71 | 0.96 | 7119   | 1305  | 0     |
| BRA | Brazil | 8718 | Virginia                   | 0.47 | 0.79 | 0.97 | 2941   | 101   | 0     |
| BRA | Brazil | 8719 | Virginopolis               | 0.42 | 0.81 | 0.98 | 4057   | 0     | 0     |
| BRA | Brazil | 8720 | Virgolandia                | 0.30 | 0.74 | 0.98 | 2787   | 361   | 0     |
| BRA | Brazil | 8721 | Visconde Do Rio Branco     | 0.30 | 0.73 | 0.96 | 21017  | 3131  | 0     |
| BRA | Brazil | 8722 | Volta Grande               | 0.26 | 0.62 | 0.82 | 2936   | 998   | 0     |
| BRA | Brazil | 8723 | Wenceslau Braz             | 1.00 | 1.00 | 1.00 | 0      | 0     | 0     |

|     |        |      |                          |      |      |      |        |        |       |
|-----|--------|------|--------------------------|------|------|------|--------|--------|-------|
| BRA | Brazil | 8724 | Abaetetuba               | 0.35 | 0.83 | 0.97 | 69819  | 0      | 0     |
| BRA | Brazil | 8725 | Abel Figueiredo          | 0.36 | 0.83 | 0.96 | 4726   | 0      | 0     |
| BRA | Brazil | 8726 | Acara                    | 0.36 | 0.87 | 1.00 | 25098  | 0      | 0     |
| BRA | Brazil | 8727 | Afua                     | 0.36 | 0.86 | 0.99 | 16977  | 0      | 0     |
| BRA | Brazil | 8728 | Agua Azul Do Norte       | 0.32 | 0.81 | 0.95 | 14237  | 0      | 0     |
| BRA | Brazil | 8729 | Alenquer                 | 0.34 | 0.82 | 0.94 | 26993  | 0      | 0     |
| BRA | Brazil | 8730 | Almeirim                 | 0.37 | 0.89 | 1.00 | 19617  | 0      | 0     |
| BRA | Brazil | 8731 | Altamira                 | 0.37 | 0.91 | 1.00 | 52389  | 0      | 0     |
| BRA | Brazil | 8732 | Anajas                   | 0.35 | 0.83 | 0.95 | 13363  | 0      | 0     |
| BRA | Brazil | 8733 | Ananindeua               | 0.34 | 0.83 | 0.96 | 249365 | 0      | 0     |
| BRA | Brazil | 8734 | Anapu                    | 0.33 | 0.85 | 1.00 | 14701  | 0      | 0     |
| BRA | Brazil | 8735 | Augusto Correa           | 0.35 | 0.83 | 0.96 | 22327  | 0      | 0     |
| BRA | Brazil | 8736 | Aurora Do Para           | 0.34 | 0.82 | 0.94 | 14719  | 0      | 0     |
| BRA | Brazil | 8737 | Aveiro                   | 0.34 | 0.87 | 1.00 | 7572   | 0      | 0     |
| BRA | Brazil | 8738 | Bagre                    | 0.31 | 0.79 | 0.91 | 15840  | 439    | 0     |
| BRA | Brazil | 8739 | Baiao                    | 0.33 | 0.82 | 0.96 | 20591  | 0      | 0     |
| BRA | Brazil | 8740 | Bannach                  | 0.40 | 0.89 | 1.00 | 1363   | 0      | 0     |
| BRA | Brazil | 8741 | Barcarena                | 0.35 | 0.86 | 0.98 | 58641  | 0      | 0     |
| BRA | Brazil | 8742 | Belem                    | 0.21 | 0.66 | 0.75 | 873286 | 213298 | 68955 |
| BRA | Brazil | 8743 | Belterra                 | 0.38 | 0.90 | 1.00 | 7093   | 0      | 0     |
| BRA | Brazil | 8744 | Benevides                | 0.35 | 0.84 | 0.98 | 26042  | 0      | 0     |
| BRA | Brazil | 8745 | Bom Jesus Do Tocantins   | 0.40 | 0.89 | 1.00 | 6791   | 0      | 0     |
| BRA | Brazil | 8746 | Bonito                   | 0.21 | 0.66 | 0.75 | 9868   | 2410   | 779   |
| BRA | Brazil | 8747 | Braganca                 | 0.35 | 0.84 | 0.97 | 57549  | 0      | 0     |
| BRA | Brazil | 8748 | Brasil Novo              | 0.45 | 0.91 | 1.00 | 5904   | 0      | 0     |
| BRA | Brazil | 8749 | Brejo Grande Do Araguaia | 0.42 | 0.84 | 0.97 | 2913   | 0      | 0     |
| BRA | Brazil | 8750 | Breu Branco              | 0.31 | 0.81 | 0.95 | 35718  | 0      | 0     |
| BRA | Brazil | 8751 | Breves                   | 0.37 | 0.87 | 0.99 | 44070  | 0      | 0     |
| BRA | Brazil | 8752 | Bujaru                   | 0.35 | 0.84 | 0.97 | 12992  | 0      | 0     |
| BRA | Brazil | 8753 | Cachoeira Do Arari       | 0.31 | 0.80 | 0.95 | 11944  | 0      | 0     |
| BRA | Brazil | 8754 | Cachoeira Do Piria       | 0.30 | 0.82 | 0.97 | 18561  | 0      | 0     |
| BRA | Brazil | 8755 | Cameta                   | 0.35 | 0.84 | 0.97 | 62199  | 0      | 0     |
| BRA | Brazil | 8756 | Canaa Dos Carajas        | 0.35 | 0.87 | 0.99 | 19581  | 0      | 0     |

|     |        |      |                       |      |      |      |        |     |   |
|-----|--------|------|-----------------------|------|------|------|--------|-----|---|
| BRA | Brazil | 8757 | Capanema              | 0.35 | 0.86 | 0.99 | 30382  | 0   | 0 |
| BRA | Brazil | 8758 | Capitao Poco          | 0.34 | 0.80 | 0.92 | 24666  | 0   | 0 |
| BRA | Brazil | 8759 | Castanhal             | 0.35 | 0.85 | 0.99 | 91806  | 0   | 0 |
| BRA | Brazil | 8760 | Chaves                | 0.28 | 0.82 | 0.98 | 11966  | 0   | 0 |
| BRA | Brazil | 8761 | Colares               | 0.38 | 0.87 | 0.99 | 5749   | 0   | 0 |
| BRA | Brazil | 8762 | Conceicao Do Araguaia | 0.38 | 0.88 | 0.99 | 20251  | 0   | 0 |
| BRA | Brazil | 8763 | Concordia Do Para     | 0.35 | 0.83 | 0.96 | 15362  | 0   | 0 |
| BRA | Brazil | 8764 | Cumaru Do Norte       | 0.31 | 0.84 | 0.98 | 6956   | 0   | 0 |
| BRA | Brazil | 8765 | Curionopolis          | 0.36 | 0.87 | 0.99 | 8065   | 0   | 0 |
| BRA | Brazil | 8766 | Curralinho            | 0.35 | 0.83 | 0.95 | 15063  | 0   | 0 |
| BRA | Brazil | 8767 | Curua                 | 0.34 | 0.82 | 0.95 | 6861   | 0   | 0 |
| BRA | Brazil | 8768 | Curuca                | 0.33 | 0.81 | 0.94 | 18941  | 0   | 0 |
| BRA | Brazil | 8769 | Dom Eliseu            | 0.34 | 0.82 | 0.95 | 27729  | 0   | 0 |
| BRA | Brazil | 8770 | Eldorado Dos Carajas  | 0.36 | 0.87 | 0.99 | 14937  | 0   | 0 |
| BRA | Brazil | 8771 | Faro                  | 0.36 | 0.85 | 0.98 | 2909   | 0   | 0 |
| BRA | Brazil | 8772 | Floresta Do Araguaia  | 0.39 | 0.86 | 0.97 | 8354   | 0   | 0 |
| BRA | Brazil | 8773 | Garrafao Do Norte     | 0.39 | 0.89 | 1.00 | 10973  | 0   | 0 |
| BRA | Brazil | 8774 | Goianesia Do Para     | 0.34 | 0.83 | 0.97 | 16756  | 0   | 0 |
| BRA | Brazil | 8775 | Gurupa                | 0.35 | 0.83 | 0.95 | 14999  | 0   | 0 |
| BRA | Brazil | 8776 | Igarape-acu           | 0.29 | 0.78 | 0.91 | 20043  | 921 | 0 |
| BRA | Brazil | 8777 | Igarape-miri          | 0.34 | 0.82 | 0.94 | 28842  | 0   | 0 |
| BRA | Brazil | 8778 | Inhangapi             | 0.33 | 0.81 | 0.94 | 5465   | 0   | 0 |
| BRA | Brazil | 8779 | Ipixuna Do Para       | 0.30 | 0.79 | 0.93 | 35885  | 803 | 0 |
| BRA | Brazil | 8780 | Irituia               | 0.34 | 0.81 | 0.93 | 15421  | 0   | 0 |
| BRA | Brazil | 8781 | Itaituba              | 0.37 | 0.88 | 1.00 | 43809  | 0   | 0 |
| BRA | Brazil | 8782 | Itupiranga            | 0.36 | 0.87 | 1.00 | 23520  | 0   | 0 |
| BRA | Brazil | 8783 | Jacareacanga          | 0.41 | 0.92 | 1.00 | 4322   | 0   | 0 |
| BRA | Brazil | 8784 | Jacunda               | 0.37 | 0.85 | 0.98 | 25557  | 0   | 0 |
| BRA | Brazil | 8785 | Juruti                | 0.35 | 0.85 | 0.99 | 27007  | 0   | 0 |
| BRA | Brazil | 8786 | Limoeiro Do Ajuru     | 0.35 | 0.85 | 0.99 | 12274  | 0   | 0 |
| BRA | Brazil | 8787 | Mae Do Rio            | 0.35 | 0.83 | 0.95 | 13575  | 0   | 0 |
| BRA | Brazil | 8788 | Magalhaes Barata      | 0.33 | 0.80 | 0.91 | 4187   | 25  | 0 |
| BRA | Brazil | 8789 | Maraba                | 0.34 | 0.85 | 0.99 | 130275 | 0   | 0 |

|     |        |      |                         |      |      |      |        |   |   |
|-----|--------|------|-------------------------|------|------|------|--------|---|---|
| BRA | Brazil | 8790 | Maracana                | 0.34 | 0.81 | 0.93 | 13210  | 0 | 0 |
| BRA | Brazil | 8791 | Marapanim               | 0.34 | 0.82 | 0.95 | 12902  | 0 | 0 |
| BRA | Brazil | 8792 | Marituba                | 0.35 | 0.85 | 0.99 | 54244  | 0 | 0 |
| BRA | Brazil | 8793 | Medicilandia            | 0.35 | 0.84 | 0.98 | 14452  | 0 | 0 |
| BRA | Brazil | 8794 | Melgaco                 | 0.36 | 0.87 | 0.99 | 12117  | 0 | 0 |
| BRA | Brazil | 8795 | Mocajuba                | 0.36 | 0.86 | 0.99 | 13935  | 0 | 0 |
| BRA | Brazil | 8796 | Moju                    | 0.33 | 0.82 | 0.96 | 42393  | 0 | 0 |
| BRA | Brazil | 8797 | Monte Alegre            | 0.35 | 0.83 | 0.96 | 27599  | 0 | 0 |
| BRA | Brazil | 8798 | Muana                   | 0.34 | 0.81 | 0.93 | 18630  | 0 | 0 |
| BRA | Brazil | 8799 | Nova Esperanca Do Piria | 0.36 | 0.83 | 0.95 | 9537   | 0 | 0 |
| BRA | Brazil | 8800 | Nova Ipixuna            | 0.35 | 0.84 | 0.98 | 7671   | 0 | 0 |
| BRA | Brazil | 8801 | Nova Timboteua          | 0.32 | 0.81 | 0.95 | 7443   | 0 | 0 |
| BRA | Brazil | 8802 | Novo Progresso          | 0.38 | 0.89 | 1.00 | 10838  | 0 | 0 |
| BRA | Brazil | 8803 | Novo Repartimento       | 0.37 | 0.86 | 0.99 | 33530  | 0 | 0 |
| BRA | Brazil | 8804 | Obidos                  | 0.35 | 0.86 | 1.00 | 22686  | 0 | 0 |
| BRA | Brazil | 8805 | Oeiras Do Para          | 0.35 | 0.81 | 0.92 | 14921  | 0 | 0 |
| BRA | Brazil | 8806 | Oriximina               | 0.36 | 0.86 | 1.00 | 32518  | 0 | 0 |
| BRA | Brazil | 8807 | Ourem                   | 0.37 | 0.86 | 0.99 | 7588   | 0 | 0 |
| BRA | Brazil | 8808 | Ourilandia Do Norte     | 0.38 | 0.90 | 0.99 | 12974  | 0 | 0 |
| BRA | Brazil | 8809 | Pacaja                  | 0.37 | 0.88 | 0.99 | 20760  | 0 | 0 |
| BRA | Brazil | 8810 | Palestina Do Para       | 0.58 | 0.90 | 0.99 | 1619   | 0 | 0 |
| BRA | Brazil | 8811 | Paragominas             | 0.35 | 0.87 | 1.00 | 51171  | 0 | 0 |
| BRA | Brazil | 8812 | Parauapebas             | 0.35 | 0.89 | 1.00 | 103931 | 0 | 0 |
| BRA | Brazil | 8813 | Pau D'arco              | 0.60 | 0.95 | 1.00 | 1111   | 0 | 0 |
| BRA | Brazil | 8814 | Peixe-boi               | 0.32 | 0.80 | 0.94 | 4596   | 0 | 0 |
| BRA | Brazil | 8815 | Picarra                 | 0.53 | 0.93 | 1.00 | 3562   | 0 | 0 |
| BRA | Brazil | 8816 | Placas                  | 0.31 | 0.80 | 0.95 | 16101  | 0 | 0 |
| BRA | Brazil | 8817 | Ponta De Pedras         | 0.33 | 0.81 | 0.94 | 15260  | 0 | 0 |
| BRA | Brazil | 8818 | Portel                  | 0.35 | 0.86 | 1.00 | 28155  | 0 | 0 |
| BRA | Brazil | 8819 | Porto De Moz            | 0.34 | 0.84 | 0.98 | 19138  | 0 | 0 |
| BRA | Brazil | 8820 | Prainha                 | 0.34 | 0.85 | 1.00 | 14087  | 0 | 0 |
| BRA | Brazil | 8821 | Primavera               | 0.37 | 0.86 | 1.00 | 4832   | 0 | 0 |
| BRA | Brazil | 8822 | Quatipuru               | 0.35 | 0.86 | 0.99 | 5922   | 0 | 0 |

|     |        |      |                            |      |      |      |        |       |      |
|-----|--------|------|----------------------------|------|------|------|--------|-------|------|
| BRA | Brazil | 8823 | Redencao                   | 0.21 | 0.66 | 0.75 | 50496  | 12334 | 3987 |
| BRA | Brazil | 8824 | Rio Maria                  | 0.47 | 0.88 | 0.99 | 6026   | 0     | 0    |
| BRA | Brazil | 8825 | Rondon Do Para             | 0.39 | 0.86 | 0.98 | 21553  | 0     | 0    |
| BRA | Brazil | 8826 | Ruropolis                  | 0.30 | 0.80 | 0.94 | 26098  | 250   | 0    |
| BRA | Brazil | 8827 | Salinopolis                | 0.35 | 0.84 | 0.98 | 16117  | 0     | 0    |
| BRA | Brazil | 8828 | Salvaterra                 | 0.35 | 0.84 | 0.99 | 11135  | 0     | 0    |
| BRA | Brazil | 8829 | Santa Barbara Do Para      | 0.33 | 0.82 | 0.96 | 10182  | 0     | 0    |
| BRA | Brazil | 8830 | Santa Cruz Do Arari        | 0.34 | 0.81 | 0.93 | 3926   | 0     | 0    |
| BRA | Brazil | 8831 | Santa Isabel Do Para       | 0.33 | 0.83 | 0.97 | 34130  | 0     | 0    |
| BRA | Brazil | 8832 | Santa Luzia Do Para        | 0.36 | 0.88 | 1.00 | 8520   | 0     | 0    |
| BRA | Brazil | 8833 | Santa Maria Das Barreiras  | 0.33 | 0.86 | 0.98 | 10521  | 0     | 0    |
| BRA | Brazil | 8834 | Santa Maria Do Para        | 0.34 | 0.82 | 0.95 | 11497  | 0     | 0    |
| BRA | Brazil | 8835 | Santana Do Araguaia        | 0.29 | 0.78 | 0.92 | 39720  | 1598  | 0    |
| BRA | Brazil | 8836 | Santarem                   | 0.36 | 0.89 | 1.00 | 139513 | 0     | 0    |
| BRA | Brazil | 8837 | Santarem Novo              | 0.35 | 0.83 | 0.96 | 2869   | 0     | 0    |
| BRA | Brazil | 8838 | Santo Antonio Do Taua      | 0.35 | 0.84 | 0.97 | 14212  | 0     | 0    |
| BRA | Brazil | 8839 | Sao Caetano De Odivelas    | 0.35 | 0.85 | 0.99 | 8087   | 0     | 0    |
| BRA | Brazil | 8840 | Sao Domingos Do Araguaia   | 0.35 | 0.85 | 0.99 | 11613  | 0     | 0    |
| BRA | Brazil | 8841 | Sao Domingos Do Capim      | 0.36 | 0.84 | 0.97 | 14036  | 0     | 0    |
| BRA | Brazil | 8842 | Sao Felix Do Xingu         | 0.27 | 0.77 | 0.90 | 80731  | 5261  | 0    |
| BRA | Brazil | 8843 | Sao Francisco Do Para      | 0.35 | 0.84 | 0.97 | 6986   | 0     | 0    |
| BRA | Brazil | 8844 | Sao Geraldo Do Araguaia    | 0.35 | 0.84 | 0.97 | 11571  | 0     | 0    |
| BRA | Brazil | 8845 | Sao Joao Da Ponta          | 0.34 | 0.81 | 0.94 | 2805   | 0     | 0    |
| BRA | Brazil | 8846 | Sao Joao De Pirabas        | 0.33 | 0.81 | 0.93 | 10670  | 0     | 0    |
| BRA | Brazil | 8847 | Sao Joao Do Araguaia       | 0.42 | 0.88 | 0.99 | 5177   | 0     | 0    |
| BRA | Brazil | 8848 | Sao Miguel Do Guama        | 0.35 | 0.82 | 0.93 | 26508  | 0     | 0    |
| BRA | Brazil | 8849 | Sao Sebastiao Da Boa Vista | 0.35 | 0.82 | 0.94 | 11183  | 0     | 0    |
| BRA | Brazil | 8850 | Sapucaia                   | 1.00 | 1.00 | 1.00 | 0      | 0     | 0    |
| BRA | Brazil | 8851 | Senador Jose Porfirio      | 0.49 | 0.93 | 1.00 | 3141   | 0     | 0    |
| BRA | Brazil | 8852 | Soure                      | 0.35 | 0.83 | 0.95 | 10835  | 0     | 0    |
| BRA | Brazil | 8853 | Tailandia                  | 0.34 | 0.85 | 0.99 | 53732  | 0     | 0    |
| BRA | Brazil | 8854 | Terra Alta                 | 0.35 | 0.84 | 0.97 | 5042   | 0     | 0    |
| BRA | Brazil | 8855 | Terra Santa                | 0.33 | 0.81 | 0.95 | 9320   | 0     | 0    |



|     |        |      |                     |      |      |      |       |       |      |
|-----|--------|------|---------------------|------|------|------|-------|-------|------|
| BRA | Brazil | 8856 | Tome-acu            | 0.35 | 0.86 | 0.99 | 28565 | 0     | 0    |
| BRA | Brazil | 8857 | Tracuateua          | 0.35 | 0.83 | 0.97 | 12784 | 0     | 0    |
| BRA | Brazil | 8858 | Trairao             | 0.33 | 0.84 | 0.98 | 8962  | 0     | 0    |
| BRA | Brazil | 8859 | Tucuma              | 0.35 | 0.85 | 0.99 | 18052 | 0     | 0    |
| BRA | Brazil | 8860 | Tucurui             | 0.38 | 0.88 | 0.99 | 48049 | 0     | 0    |
| BRA | Brazil | 8861 | Ulianopolis         | 0.29 | 0.78 | 0.92 | 34544 | 1054  | 0    |
| BRA | Brazil | 8862 | Uruara              | 0.36 | 0.86 | 0.99 | 20366 | 0     | 0    |
| BRA | Brazil | 8863 | Vigia               | 0.34 | 0.82 | 0.95 | 24304 | 0     | 0    |
| BRA | Brazil | 8864 | Viseu               | 0.35 | 0.85 | 0.99 | 27858 | 0     | 0    |
| BRA | Brazil | 8865 | Vitoria Do Xingu    | 0.36 | 0.87 | 0.99 | 6738  | 0     | 0    |
| BRA | Brazil | 8866 | Xinguara            | 0.36 | 0.87 | 0.99 | 19833 | 0     | 0    |
| BRA | Brazil | 8867 | Agua Branca         | 0.08 | 0.40 | 0.55 | 8797  | 4854  | 3016 |
| BRA | Brazil | 8868 | Aguiar              | 0.08 | 0.40 | 0.55 | 4485  | 2474  | 1538 |
| BRA | Brazil | 8869 | Alagoa Grande       | 0.08 | 0.40 | 0.55 | 21371 | 11791 | 7327 |
| BRA | Brazil | 8870 | Alagoa Nova         | 0.08 | 0.40 | 0.55 | 13737 | 7579  | 4710 |
| BRA | Brazil | 8871 | Alagoinha           | 0.08 | 0.40 | 0.55 | 10568 | 5830  | 3623 |
| BRA | Brazil | 8872 | Alcantil            | 0.08 | 0.40 | 0.55 | 3302  | 1822  | 1132 |
| BRA | Brazil | 8873 | Algodao De Jandaira | 0.08 | 0.40 | 0.55 | 5887  | 3248  | 2018 |
| BRA | Brazil | 8874 | Alhandra            | 0.08 | 0.40 | 0.55 | 15730 | 8679  | 5393 |
| BRA | Brazil | 8875 | Amparo              | 0.08 | 0.40 | 0.55 | 1620  | 894   | 555  |
| BRA | Brazil | 8876 | Aparecida           | 0.13 | 0.52 | 0.75 | 4727  | 1950  | 375  |
| BRA | Brazil | 8877 | Aracagi             | 0.08 | 0.40 | 0.55 | 12367 | 6823  | 4240 |
| BRA | Brazil | 8878 | Arara               | 0.08 | 0.40 | 0.55 | 7445  | 4107  | 2553 |
| BRA | Brazil | 8879 | Araruna             | 0.08 | 0.40 | 0.55 | 16497 | 9102  | 5656 |
| BRA | Brazil | 8880 | Areia               | 0.08 | 0.40 | 0.55 | 16941 | 9347  | 5809 |
| BRA | Brazil | 8881 | Areia De Baraunas   | 0.08 | 0.40 | 0.55 | 1468  | 810   | 503  |
| BRA | Brazil | 8882 | Areial              | 0.08 | 0.40 | 0.55 | 6535  | 3606  | 2241 |
| BRA | Brazil | 8883 | Aroeiras            | 0.08 | 0.40 | 0.55 | 14042 | 7747  | 4815 |
| BRA | Brazil | 8884 | Assis Chateaubriand | 0.70 | 0.95 | 1.00 | 1266  | 0     | 0    |
| BRA | Brazil | 8885 | Assuncao            | 0.08 | 0.40 | 0.55 | 3355  | 1851  | 1150 |
| BRA | Brazil | 8886 | Baia Da Traicao     | 0.08 | 0.40 | 0.55 | 6535  | 3605  | 2241 |
| BRA | Brazil | 8887 | Bananeiras          | 0.08 | 0.40 | 0.55 | 20643 | 11389 | 7078 |
| BRA | Brazil | 8888 | Barauna             | 0.08 | 0.40 | 0.55 | 3674  | 2027  | 1260 |

|     |        |      |                        |      |      |      |        |        |        |
|-----|--------|------|------------------------|------|------|------|--------|--------|--------|
| BRA | Brazil | 8889 | Barra De Santa Rosa    | 0.08 | 0.40 | 0.55 | 11353  | 6264   | 3893   |
| BRA | Brazil | 8890 | Barra De Santana       | 0.08 | 0.40 | 0.55 | 5808   | 3204   | 1991   |
| BRA | Brazil | 8891 | Barra De Sao Miguel    | 0.08 | 0.40 | 0.55 | 4392   | 2423   | 1506   |
| BRA | Brazil | 8892 | Bayeux                 | 0.08 | 0.40 | 0.55 | 70647  | 38978  | 24223  |
| BRA | Brazil | 8893 | Belem                  | 0.08 | 0.40 | 0.55 | 10811  | 5965   | 3707   |
| BRA | Brazil | 8894 | Belem Do Brejo Do Cruz | 0.08 | 0.40 | 0.55 | 5427   | 2994   | 1861   |
| BRA | Brazil | 8895 | Bernardino Batista     | 0.08 | 0.40 | 0.55 | 2137   | 1179   | 733    |
| BRA | Brazil | 8896 | Boa Ventura            | 0.08 | 0.40 | 0.55 | 3969   | 2190   | 1361   |
| BRA | Brazil | 8897 | Boa Vista              | 1.00 | 1.00 | 1.00 | 0      | 0      | 0      |
| BRA | Brazil | 8898 | Bom Jesus              | 1.00 | 1.00 | 1.00 | 0      | 0      | 0      |
| BRA | Brazil | 8899 | Bom Sucesso            | 0.08 | 0.40 | 0.55 | 3902   | 2153   | 1338   |
| BRA | Brazil | 8900 | Bonito De Santa Fe     | 0.08 | 0.40 | 0.55 | 8532   | 4707   | 2925   |
| BRA | Brazil | 8901 | Boqueirao              | 0.08 | 0.40 | 0.55 | 13053  | 7201   | 4475   |
| BRA | Brazil | 8902 | Borborema              | 0.32 | 0.84 | 0.97 | 4375   | 0      | 0      |
| BRA | Brazil | 8903 | Brejo Do Cruz          | 0.08 | 0.40 | 0.55 | 10433  | 5756   | 3577   |
| BRA | Brazil | 8904 | Brejo Dos Santos       | 0.08 | 0.40 | 0.55 | 4940   | 2726   | 1694   |
| BRA | Brazil | 8905 | Caapora                | 0.08 | 0.40 | 0.55 | 16443  | 9072   | 5638   |
| BRA | Brazil | 8906 | Cabaceiras             | 0.08 | 0.40 | 0.55 | 3854   | 2126   | 1321   |
| BRA | Brazil | 8907 | Cabedelo               | 0.08 | 0.40 | 0.55 | 48954  | 27009  | 16785  |
| BRA | Brazil | 8908 | Cachoeira Dos Indios   | 0.08 | 0.40 | 0.55 | 7440   | 4105   | 2551   |
| BRA | Brazil | 8909 | Cacimba De Areia       | 0.08 | 0.40 | 0.55 | 2825   | 1559   | 969    |
| BRA | Brazil | 8910 | Cacimba De Dentro      | 0.08 | 0.40 | 0.55 | 13510  | 7454   | 4632   |
| BRA | Brazil | 8911 | Cacimbas               | 0.08 | 0.40 | 0.55 | 4951   | 2732   | 1698   |
| BRA | Brazil | 8912 | Caicara                | 0.20 | 0.58 | 0.82 | 4493   | 1614   | 0      |
| BRA | Brazil | 8913 | Cajazeiras             | 0.08 | 0.40 | 0.55 | 45629  | 25175  | 15645  |
| BRA | Brazil | 8914 | Cajazeirinhas          | 0.08 | 0.40 | 0.55 | 2341   | 1292   | 803    |
| BRA | Brazil | 8915 | Caldas Brandao         | 0.08 | 0.40 | 0.55 | 2733   | 1508   | 937    |
| BRA | Brazil | 8916 | Camalau                | 0.08 | 0.40 | 0.55 | 4524   | 2496   | 1551   |
| BRA | Brazil | 8917 | Campina Grande         | 0.08 | 0.40 | 0.55 | 293485 | 161923 | 100626 |
| BRA | Brazil | 8918 | Capim                  | 0.08 | 0.40 | 0.55 | 5173   | 2854   | 1774   |
| BRA | Brazil | 8919 | Caraubas               | 0.08 | 0.40 | 0.55 | 2922   | 1612   | 1002   |
| BRA | Brazil | 8920 | Carrapateira           | 0.08 | 0.40 | 0.55 | 1858   | 1025   | 637    |
| BRA | Brazil | 8921 | Casserengue            | 0.08 | 0.40 | 0.55 | 5492   | 3030   | 1883   |

|     |        |      |                        |      |      |      |       |       |       |
|-----|--------|------|------------------------|------|------|------|-------|-------|-------|
| BRA | Brazil | 8922 | Catingueira            | 0.08 | 0.40 | 0.55 | 3245  | 1790  | 1113  |
| BRA | Brazil | 8923 | Catole Do Rocha        | 0.08 | 0.40 | 0.55 | 21827 | 12043 | 7484  |
| BRA | Brazil | 8924 | Caturite               | 0.08 | 0.40 | 0.55 | 3513  | 1938  | 1204  |
| BRA | Brazil | 8925 | Conceicao              | 0.08 | 0.40 | 0.55 | 13924 | 7682  | 4774  |
| BRA | Brazil | 8926 | Condado                | 0.08 | 0.40 | 0.55 | 5721  | 3157  | 1962  |
| BRA | Brazil | 8927 | Conde                  | 0.08 | 0.40 | 0.55 | 16557 | 9135  | 5677  |
| BRA | Brazil | 8928 | Congo                  | 0.08 | 0.40 | 0.55 | 3636  | 2006  | 1247  |
| BRA | Brazil | 8929 | Coremas                | 0.08 | 0.40 | 0.55 | 11764 | 6491  | 4034  |
| BRA | Brazil | 8930 | Coxixola               | 0.08 | 0.40 | 0.55 | 1147  | 633   | 393   |
| BRA | Brazil | 8931 | Cruz Do Espirito Santo | 0.08 | 0.40 | 0.55 | 12808 | 7067  | 4392  |
| BRA | Brazil | 8932 | Cubati                 | 0.08 | 0.40 | 0.55 | 5785  | 3192  | 1984  |
| BRA | Brazil | 8933 | Cuite                  | 0.08 | 0.40 | 0.55 | 14309 | 7895  | 4906  |
| BRA | Brazil | 8934 | Cuite De Mamanguape    | 0.08 | 0.40 | 0.55 | 4619  | 2548  | 1584  |
| BRA | Brazil | 8935 | Cuitegi                | 0.08 | 0.40 | 0.55 | 5361  | 2958  | 1838  |
| BRA | Brazil | 8936 | Curral De Cima         | 0.08 | 0.40 | 0.55 | 3678  | 2029  | 1261  |
| BRA | Brazil | 8937 | Curral Velho           | 0.08 | 0.40 | 0.55 | 1738  | 959   | 596   |
| BRA | Brazil | 8938 | Damiaio                | 0.08 | 0.40 | 0.55 | 3620  | 1997  | 1241  |
| BRA | Brazil | 8939 | Desterro               | 0.08 | 0.40 | 0.55 | 5581  | 3079  | 1914  |
| BRA | Brazil | 8940 | Diamante               | 0.08 | 0.40 | 0.55 | 4428  | 2443  | 1518  |
| BRA | Brazil | 8941 | Dona Ines              | 0.08 | 0.40 | 0.55 | 5596  | 3087  | 1919  |
| BRA | Brazil | 8942 | Duas Estradas          | 0.08 | 0.40 | 0.55 | 1730  | 954   | 593   |
| BRA | Brazil | 8943 | Emas                   | 0.08 | 0.40 | 0.55 | 2588  | 1428  | 887   |
| BRA | Brazil | 8944 | Esperanca              | 0.08 | 0.40 | 0.55 | 23455 | 12941 | 8042  |
| BRA | Brazil | 8945 | Fagundes               | 0.08 | 0.40 | 0.55 | 9537  | 5262  | 3270  |
| BRA | Brazil | 8946 | Frei Martinho          | 0.08 | 0.40 | 0.55 | 2175  | 1200  | 746   |
| BRA | Brazil | 8947 | Gado Bravo             | 0.08 | 0.40 | 0.55 | 6332  | 3494  | 2171  |
| BRA | Brazil | 8948 | Guarabira              | 0.08 | 0.40 | 0.55 | 42517 | 23458 | 14578 |
| BRA | Brazil | 8949 | Gurinhem               | 0.08 | 0.40 | 0.55 | 9689  | 5346  | 3322  |
| BRA | Brazil | 8950 | Gurjao                 | 0.08 | 0.40 | 0.55 | 2863  | 1580  | 982   |
| BRA | Brazil | 8951 | Ibiara                 | 0.08 | 0.40 | 0.55 | 4350  | 2400  | 1492  |
| BRA | Brazil | 8952 | Igaracy                | 0.08 | 0.40 | 0.55 | 4388  | 2421  | 1504  |
| BRA | Brazil | 8953 | Imaculada              | 0.08 | 0.40 | 0.55 | 6657  | 3673  | 2282  |
| BRA | Brazil | 8954 | Inga                   | 0.08 | 0.40 | 0.55 | 10451 | 5766  | 3583  |

|     |        |      |                 |      |      |      |        |        |        |
|-----|--------|------|-----------------|------|------|------|--------|--------|--------|
| BRA | Brazil | 8955 | Itabaiana       | 0.08 | 0.40 | 0.55 | 17819  | 9831   | 6110   |
| BRA | Brazil | 8956 | Itaporanga      | 0.59 | 0.76 | 0.92 | 5334   | 889    | 0      |
| BRA | Brazil | 8957 | Itapororoca     | 0.08 | 0.40 | 0.55 | 13773  | 7599   | 4722   |
| BRA | Brazil | 8958 | Itatuba         | 0.08 | 0.40 | 0.55 | 8688   | 4793   | 2979   |
| BRA | Brazil | 8959 | Jacarau         | 0.08 | 0.40 | 0.55 | 10250  | 5655   | 3514   |
| BRA | Brazil | 8960 | Jerico          | 0.08 | 0.40 | 0.55 | 5317   | 2933   | 1823   |
| BRA | Brazil | 8961 | Joao Pessoa     | 0.08 | 0.40 | 0.55 | 587626 | 324208 | 201478 |
| BRA | Brazil | 8962 | Juarez Tavora   | 0.08 | 0.40 | 0.55 | 4105   | 2265   | 1407   |
| BRA | Brazil | 8963 | Juazeirinho     | 0.08 | 0.40 | 0.55 | 12950  | 7145   | 4440   |
| BRA | Brazil | 8964 | Junco Do Serido | 0.08 | 0.40 | 0.55 | 4794   | 2645   | 1644   |
| BRA | Brazil | 8965 | Juripiranga     | 0.08 | 0.40 | 0.55 | 7454   | 4113   | 2556   |
| BRA | Brazil | 8966 | Juru            | 0.08 | 0.40 | 0.55 | 8226   | 4539   | 2821   |
| BRA | Brazil | 8967 | Lagoa           | 0.08 | 0.40 | 0.55 | 3188   | 1759   | 1093   |
| BRA | Brazil | 8968 | Lagoa De Dentro | 0.08 | 0.40 | 0.55 | 5741   | 3167   | 1968   |
| BRA | Brazil | 8969 | Lagoa Seca      | 0.08 | 0.40 | 0.55 | 14511  | 8006   | 4975   |
| BRA | Brazil | 8970 | Lastro          | 0.08 | 0.40 | 0.55 | 2679   | 1478   | 918    |
| BRA | Brazil | 8971 | Livramento      | 0.08 | 0.40 | 0.55 | 5158   | 2846   | 1768   |
| BRA | Brazil | 8972 | Logradouro      | 0.08 | 0.40 | 0.55 | 5862   | 3234   | 2010   |
| BRA | Brazil | 8973 | Lucena          | 0.08 | 0.40 | 0.55 | 9239   | 5097   | 3168   |
| BRA | Brazil | 8974 | Mae D'agua      | 0.08 | 0.40 | 0.55 | 3533   | 1949   | 1211   |
| BRA | Brazil | 8975 | Malta           | 0.08 | 0.40 | 0.55 | 4228   | 2333   | 1450   |
| BRA | Brazil | 8976 | Mamanguape      | 0.08 | 0.40 | 0.55 | 32827  | 18111  | 11255  |
| BRA | Brazil | 8977 | Manaira         | 0.08 | 0.40 | 0.55 | 8660   | 4778   | 2969   |
| BRA | Brazil | 8978 | Marcacao        | 0.08 | 0.40 | 0.55 | 3981   | 2197   | 1365   |
| BRA | Brazil | 8979 | Mari            | 0.08 | 0.40 | 0.55 | 16833  | 9287   | 5771   |
| BRA | Brazil | 8980 | Marizopolis     | 0.08 | 0.40 | 0.55 | 8257   | 4556   | 2831   |
| BRA | Brazil | 8981 | Massaranduba    | 0.08 | 0.45 | 0.65 | 11035  | 5383   | 2331   |
| BRA | Brazil | 8982 | Mataraca        | 0.08 | 0.40 | 0.55 | 5952   | 3284   | 2041   |
| BRA | Brazil | 8983 | Matinhas        | 0.08 | 0.40 | 0.55 | 2271   | 1253   | 779    |
| BRA | Brazil | 8984 | Mato Grosso     | 0.08 | 0.40 | 0.55 | 994    | 548    | 341    |
| BRA | Brazil | 8985 | Matureia        | 0.08 | 0.40 | 0.55 | 4926   | 2718   | 1689   |
| BRA | Brazil | 8986 | Mogeiro         | 0.08 | 0.40 | 0.55 | 9166   | 5057   | 3143   |
| BRA | Brazil | 8987 | Montadas        | 0.08 | 0.40 | 0.55 | 6627   | 3656   | 2272   |

|     |        |      |                       |      |      |      |       |       |       |
|-----|--------|------|-----------------------|------|------|------|-------|-------|-------|
| BRA | Brazil | 8988 | Monte Horebe          | 0.08 | 0.40 | 0.55 | 3419  | 1886  | 1172  |
| BRA | Brazil | 8989 | Monteiro              | 0.08 | 0.40 | 0.55 | 24285 | 13398 | 8326  |
| BRA | Brazil | 8990 | Mulungu               | 0.08 | 0.40 | 0.55 | 7631  | 4210  | 2616  |
| BRA | Brazil | 8991 | Natuba                | 0.08 | 0.40 | 0.55 | 8045  | 4438  | 2758  |
| BRA | Brazil | 8992 | Nazarezinho           | 0.08 | 0.40 | 0.55 | 5847  | 3226  | 2005  |
| BRA | Brazil | 8993 | Nova Floresta         | 0.08 | 0.40 | 0.55 | 10357 | 5714  | 3551  |
| BRA | Brazil | 8994 | Nova Olinda           | 0.08 | 0.40 | 0.55 | 4763  | 2628  | 1633  |
| BRA | Brazil | 8995 | Nova Palmeira         | 0.08 | 0.40 | 0.55 | 2961  | 1634  | 1015  |
| BRA | Brazil | 8996 | Olho D'agua           | 0.08 | 0.40 | 0.55 | 4899  | 2703  | 1680  |
| BRA | Brazil | 8997 | Olivedos              | 0.08 | 0.40 | 0.55 | 2765  | 1526  | 948   |
| BRA | Brazil | 8998 | Ouro Velho            | 0.08 | 0.40 | 0.55 | 2417  | 1334  | 829   |
| BRA | Brazil | 8999 | Parari                | 0.08 | 0.40 | 0.55 | 1022  | 564   | 351   |
| BRA | Brazil | 9000 | Passagem              | 0.08 | 0.40 | 0.55 | 1926  | 1062  | 660   |
| BRA | Brazil | 9001 | Patos                 | 0.08 | 0.40 | 0.55 | 78788 | 43469 | 27014 |
| BRA | Brazil | 9002 | Paulista              | 0.08 | 0.40 | 0.55 | 9841  | 5430  | 3374  |
| BRA | Brazil | 9003 | Pedra Branca          | 0.08 | 0.40 | 0.55 | 3357  | 1852  | 1151  |
| BRA | Brazil | 9004 | Pedra Lavrada         | 0.08 | 0.40 | 0.55 | 5883  | 3246  | 2017  |
| BRA | Brazil | 9005 | Pedras De Fogo        | 0.08 | 0.40 | 0.55 | 23364 | 12890 | 8011  |
| BRA | Brazil | 9006 | Pedro Regio           | 0.08 | 0.40 | 0.55 | 4899  | 2703  | 1680  |
| BRA | Brazil | 9007 | Pianco                | 0.08 | 0.40 | 0.55 | 11712 | 6462  | 4016  |
| BRA | Brazil | 9008 | Picui                 | 0.08 | 0.40 | 0.55 | 14464 | 7980  | 4959  |
| BRA | Brazil | 9009 | Pilar                 | 0.08 | 0.40 | 0.55 | 8401  | 4635  | 2880  |
| BRA | Brazil | 9010 | Piloes                | 0.08 | 0.40 | 0.55 | 4149  | 2289  | 1423  |
| BRA | Brazil | 9011 | Piloezinhos           | 0.08 | 0.40 | 0.55 | 3921  | 2164  | 1345  |
| BRA | Brazil | 9012 | Pirpirituba           | 0.08 | 0.40 | 0.55 | 9317  | 5140  | 3194  |
| BRA | Brazil | 9013 | Pitimbu               | 0.08 | 0.40 | 0.55 | 12611 | 6958  | 4324  |
| BRA | Brazil | 9014 | Pocinhos              | 0.08 | 0.40 | 0.55 | 14835 | 8185  | 5086  |
| BRA | Brazil | 9015 | Poco Dantas           | 0.08 | 0.40 | 0.55 | 2088  | 1152  | 716   |
| BRA | Brazil | 9016 | Poco De Jose De Moura | 0.08 | 0.40 | 0.55 | 3370  | 1860  | 1156  |
| BRA | Brazil | 9017 | Pombal                | 0.08 | 0.40 | 0.55 | 22966 | 12671 | 7874  |
| BRA | Brazil | 9018 | Prata                 | 0.08 | 0.40 | 0.55 | 2972  | 1640  | 1019  |
| BRA | Brazil | 9019 | Princesa Isabel       | 0.08 | 0.40 | 0.55 | 17221 | 9501  | 5904  |
| BRA | Brazil | 9020 | Puxinana              | 0.08 | 0.40 | 0.55 | 16556 | 9134  | 5676  |

|     |        |      |                          |      |      |      |        |       |       |
|-----|--------|------|--------------------------|------|------|------|--------|-------|-------|
| BRA | Brazil | 9021 | Queimadas                | 0.08 | 0.40 | 0.55 | 32471  | 17915 | 11133 |
| BRA | Brazil | 9022 | Quixaba                  | 0.08 | 0.40 | 0.55 | 1139   | 628   | 390   |
| BRA | Brazil | 9023 | Remigio                  | 0.08 | 0.40 | 0.55 | 13137  | 7248  | 4504  |
| BRA | Brazil | 9024 | Riachao                  | 0.08 | 0.40 | 0.55 | 2452   | 1353  | 841   |
| BRA | Brazil | 9025 | Riachao Do Poco          | 0.08 | 0.40 | 0.55 | 6663   | 3676  | 2284  |
| BRA | Brazil | 9026 | Riacho De Santo Antonio  | 0.08 | 0.40 | 0.55 | 1480   | 816   | 507   |
| BRA | Brazil | 9027 | Riacho Dos Cavalos       | 0.08 | 0.40 | 0.55 | 6583   | 3632  | 2257  |
| BRA | Brazil | 9028 | Rio Tinto                | 0.08 | 0.40 | 0.55 | 20082  | 11080 | 6886  |
| BRA | Brazil | 9029 | Salgadinho               | 0.08 | 0.40 | 0.55 | 2730   | 1506  | 936   |
| BRA | Brazil | 9030 | Salgado De Sao Felix     | 0.08 | 0.40 | 0.55 | 7177   | 3960  | 2461  |
| BRA | Brazil | 9031 | Santa Cecilia            | 0.19 | 0.60 | 0.83 | 4410   | 1459  | 0     |
| BRA | Brazil | 9032 | Santa Cruz               | 0.08 | 0.40 | 0.55 | 5521   | 3046  | 1893  |
| BRA | Brazil | 9033 | Santa Helena             | 0.08 | 0.40 | 0.55 | 3849   | 2123  | 1320  |
| BRA | Brazil | 9034 | Santa Ines               | 0.08 | 0.40 | 0.55 | 2647   | 1461  | 908   |
| BRA | Brazil | 9035 | Santa Luzia              | 0.08 | 0.40 | 0.55 | 11268  | 6217  | 3863  |
| BRA | Brazil | 9036 | Santa Rita               | 0.08 | 0.40 | 0.55 | 100020 | 55183 | 34293 |
| BRA | Brazil | 9037 | Santa Teresinha          | 0.08 | 0.40 | 0.55 | 3133   | 1729  | 1074  |
| BRA | Brazil | 9038 | Santana De Mangueira     | 0.08 | 0.40 | 0.55 | 4138   | 2283  | 1419  |
| BRA | Brazil | 9039 | Santana Dos Garrotes     | 0.08 | 0.40 | 0.55 | 4007   | 2211  | 1374  |
| BRA | Brazil | 9040 | Santarem                 | 0.08 | 0.40 | 0.55 | 1835   | 1013  | 629   |
| BRA | Brazil | 9041 | Santo Andre              | 1.00 | 1.00 | 1.00 | 0      | 0     | 0     |
| BRA | Brazil | 9042 | Sao Bento                | 0.08 | 0.40 | 0.55 | 24070  | 13280 | 8253  |
| BRA | Brazil | 9043 | Sao Bento De Pombal      | 0.08 | 0.40 | 0.55 | 2839   | 1566  | 973   |
| BRA | Brazil | 9044 | Sao Domingos De Pombal   | 0.08 | 0.40 | 0.55 | 2635   | 1454  | 903   |
| BRA | Brazil | 9045 | Sao Domingos Do Cariri   | 0.08 | 0.40 | 0.55 | 1926   | 1062  | 660   |
| BRA | Brazil | 9046 | Sao Francisco            | 0.08 | 0.40 | 0.55 | 2238   | 1235  | 767   |
| BRA | Brazil | 9047 | Sao Joao Do Cariri       | 0.08 | 0.40 | 0.55 | 3250   | 1793  | 1114  |
| BRA | Brazil | 9048 | Sao Joao Do Rio Do Peixe | 0.08 | 0.40 | 0.55 | 13521  | 7460  | 4636  |
| BRA | Brazil | 9049 | Sao Joao Do Tigre        | 0.08 | 0.40 | 0.55 | 3066   | 1691  | 1051  |
| BRA | Brazil | 9050 | Sao Jose Da Lagoa Tapada | 0.08 | 0.40 | 0.55 | 5698   | 3144  | 1954  |
| BRA | Brazil | 9051 | Sao Jose De Caiana       | 0.08 | 0.40 | 0.55 | 4697   | 2592  | 1611  |
| BRA | Brazil | 9052 | Sao Jose De Espinharas   | 0.08 | 0.40 | 0.55 | 3532   | 1949  | 1211  |
| BRA | Brazil | 9053 | Sao Jose De Piranhas     | 0.08 | 0.40 | 0.55 | 15035  | 8295  | 5155  |

|     |        |      |                                |      |      |      |       |       |       |
|-----|--------|------|--------------------------------|------|------|------|-------|-------|-------|
| BRA | Brazil | 9054 | Sao Jose De Princesa           | 0.08 | 0.40 | 0.55 | 2945  | 1625  | 1010  |
| BRA | Brazil | 9055 | Sao Jose Do Bonfim             | 0.08 | 0.40 | 0.55 | 2420  | 1335  | 830   |
| BRA | Brazil | 9056 | Sao Jose Do Brejo Do Cruz      | 0.08 | 0.40 | 0.55 | 1280  | 706   | 439   |
| BRA | Brazil | 9057 | Sao Jose Do Sabugi             | 0.08 | 0.40 | 0.55 | 3026  | 1670  | 1038  |
| BRA | Brazil | 9058 | Sao Jose Dos Cordeiros         | 0.08 | 0.40 | 0.55 | 3537  | 1951  | 1213  |
| BRA | Brazil | 9059 | Sao Jose Dos Ramos             | 0.08 | 0.40 | 0.55 | 3911  | 2158  | 1341  |
| BRA | Brazil | 9060 | Sao Mamede                     | 0.08 | 0.40 | 0.55 | 5990  | 3305  | 2054  |
| BRA | Brazil | 9061 | Sao Miguel De Taipu            | 0.08 | 0.40 | 0.55 | 4044  | 2231  | 1387  |
| BRA | Brazil | 9062 | Sao Sebastiao De Lagoa De Roca | 0.08 | 0.40 | 0.55 | 9310  | 5136  | 3192  |
| BRA | Brazil | 9063 | Sao Sebastiao Do Umbuzeiro     | 0.08 | 0.40 | 0.55 | 2331  | 1286  | 799   |
| BRA | Brazil | 9064 | Sape                           | 0.08 | 0.40 | 0.55 | 37774 | 20841 | 12951 |
| BRA | Brazil | 9065 | Serido                         | 0.08 | 0.40 | 0.55 | 7514  | 4145  | 2576  |
| BRA | Brazil | 9066 | Serra Branca                   | 0.08 | 0.40 | 0.55 | 9619  | 5307  | 3298  |
| BRA | Brazil | 9067 | Serra Da Raiz                  | 0.08 | 0.40 | 0.55 | 2509  | 1384  | 860   |
| BRA | Brazil | 9068 | Serra Grande                   | 0.08 | 0.40 | 0.55 | 2219  | 1224  | 761   |
| BRA | Brazil | 9069 | Serra Redonda                  | 0.08 | 0.40 | 0.55 | 4753  | 2623  | 1630  |
| BRA | Brazil | 9070 | Serraria                       | 0.08 | 0.40 | 0.55 | 3423  | 1888  | 1173  |
| BRA | Brazil | 9071 | Sertaozinho                    | 0.08 | 0.40 | 0.55 | 2112  | 1165  | 724   |
| BRA | Brazil | 9072 | Sobrado                        | 0.08 | 0.40 | 0.55 | 3974  | 2193  | 1363  |
| BRA | Brazil | 9073 | Solanea                        | 0.08 | 0.40 | 0.55 | 14856 | 8196  | 5094  |
| BRA | Brazil | 9074 | Soledade                       | 0.98 | 0.99 | 1.00 | 0     | 0     | 0     |
| BRA | Brazil | 9075 | Sossego                        | 0.08 | 0.40 | 0.55 | 2278  | 1257  | 781   |
| BRA | Brazil | 9076 | Sousa                          | 0.08 | 0.40 | 0.55 | 47965 | 26463 | 16446 |
| BRA | Brazil | 9077 | Sume                           | 0.08 | 0.40 | 0.55 | 12617 | 6961  | 4326  |
| BRA | Brazil | 9078 | Tacima                         | 0.08 | 0.40 | 0.55 | 9505  | 5244  | 3259  |
| BRA | Brazil | 9079 | Taperoa                        | 0.08 | 0.40 | 0.55 | 11414 | 6298  | 3914  |
| BRA | Brazil | 9080 | Tavares                        | 0.08 | 0.42 | 0.59 | 9573  | 5035  | 2767  |
| BRA | Brazil | 9081 | Teixeira                       | 0.08 | 0.40 | 0.55 | 11489 | 6339  | 3939  |
| BRA | Brazil | 9082 | Tenorio                        | 0.08 | 0.40 | 0.55 | 1849  | 1020  | 634   |
| BRA | Brazil | 9083 | Triunfo                        | 0.87 | 0.95 | 1.00 | 0     | 0     | 0     |
| BRA | Brazil | 9084 | Uirauna                        | 0.08 | 0.40 | 0.55 | 11905 | 6568  | 4082  |
| BRA | Brazil | 9085 | Umbuzeiro                      | 0.08 | 0.40 | 0.55 | 7292  | 4023  | 2500  |
| BRA | Brazil | 9086 | Varzea                         | 0.08 | 0.40 | 0.55 | 1942  | 1071  | 666   |

|     |        |      |                     |      |      |      |       |       |      |
|-----|--------|------|---------------------|------|------|------|-------|-------|------|
| BRA | Brazil | 9087 | Vieiropolis         | 0.08 | 0.40 | 0.55 | 3104  | 1713  | 1064 |
| BRA | Brazil | 9088 | Vista Serrana       | 0.08 | 0.40 | 0.55 | 2542  | 1403  | 872  |
| BRA | Brazil | 9089 | Zabele              | 0.08 | 0.40 | 0.55 | 1843  | 1017  | 632  |
| BRA | Brazil | 9090 | Abatia              | 0.08 | 0.40 | 0.55 | 5742  | 3168  | 1969 |
| BRA | Brazil | 9091 | Adrianopolis        | 0.08 | 0.40 | 0.55 | 4541  | 2506  | 1557 |
| BRA | Brazil | 9092 | Agudos Do Sul       | 0.08 | 0.40 | 0.55 | 6560  | 3619  | 2249 |
| BRA | Brazil | 9093 | Almirante Tamandare | 0.24 | 0.64 | 0.88 | 64298 | 18611 | 0    |
| BRA | Brazil | 9094 | Altamira Do Parana  | 0.76 | 0.91 | 1.00 | 154   | 0     | 0    |
| BRA | Brazil | 9095 | Alto Parana         | 0.39 | 0.80 | 0.97 | 5963  | 11    | 0    |
| BRA | Brazil | 9096 | Alto Piquiri        | 0.37 | 0.73 | 0.94 | 4363  | 751   | 0    |
| BRA | Brazil | 9097 | Altonia             | 0.35 | 0.77 | 0.97 | 9926  | 576   | 0    |
| BRA | Brazil | 9098 | Alvorada Do Sul     | 0.28 | 0.72 | 0.95 | 5809  | 916   | 0    |
| BRA | Brazil | 9099 | Amapora             | 0.32 | 0.71 | 0.97 | 2914  | 548   | 0    |
| BRA | Brazil | 9100 | Ampere              | 0.32 | 0.77 | 0.98 | 9132  | 632   | 0    |
| BRA | Brazil | 9101 | Anahy               | 0.51 | 0.90 | 0.99 | 653   | 0     | 0    |
| BRA | Brazil | 9102 | Andira              | 0.27 | 0.77 | 0.96 | 11000 | 679   | 0    |
| BRA | Brazil | 9103 | Angulo              | 0.08 | 0.40 | 0.55 | 2129  | 1175  | 730  |
| BRA | Brazil | 9104 | Antonina            | 0.21 | 0.59 | 0.82 | 11027 | 3826  | 0    |
| BRA | Brazil | 9105 | Antonio Olinto      | 0.29 | 0.62 | 0.85 | 3806  | 1316  | 0    |
| BRA | Brazil | 9106 | Apucarana           | 0.23 | 0.65 | 0.91 | 75774 | 19705 | 0    |
| BRA | Brazil | 9107 | Arapongas           | 0.27 | 0.67 | 0.91 | 62912 | 15452 | 0    |
| BRA | Brazil | 9108 | Arapoti             | 0.33 | 0.75 | 0.97 | 12996 | 1404  | 0    |
| BRA | Brazil | 9109 | Arapua              | 0.17 | 0.49 | 0.65 | 2127  | 1039  | 507  |
| BRA | Brazil | 9110 | Araruna             | 0.17 | 0.49 | 0.65 | 8848  | 4323  | 2111 |
| BRA | Brazil | 9111 | Araucaria           | 0.23 | 0.66 | 0.93 | 80498 | 20468 | 0    |
| BRA | Brazil | 9112 | Ariranha Do Ivai    | 0.53 | 0.83 | 0.98 | 613   | 0     | 0    |
| BRA | Brazil | 9113 | Assai               | 0.39 | 0.72 | 0.91 | 6635  | 1346  | 0    |
| BRA | Brazil | 9114 | Assis Chateaubriand | 0.17 | 0.49 | 0.65 | 21486 | 10499 | 5126 |
| BRA | Brazil | 9115 | Astorga             | 0.22 | 0.68 | 0.91 | 15078 | 3243  | 0    |
| BRA | Brazil | 9116 | Atalaia             | 0.17 | 0.49 | 0.65 | 2502  | 1223  | 597  |
| BRA | Brazil | 9117 | Balsa Nova          | 0.22 | 0.67 | 0.95 | 6691  | 1558  | 0    |
| BRA | Brazil | 9118 | Bandeirantes        | 0.08 | 0.40 | 0.55 | 23393 | 12906 | 8021 |
| BRA | Brazil | 9119 | Barbosa Ferraz      | 0.42 | 0.75 | 0.97 | 4402  | 547   | 0    |



|     |        |      |                          |      |      |      |       |       |       |
|-----|--------|------|--------------------------|------|------|------|-------|-------|-------|
| BRA | Brazil | 9120 | Barra Do Jacare          | 0.34 | 0.74 | 0.92 | 1274  | 167   | 0     |
| BRA | Brazil | 9121 | Barracao                 | 1.00 | 1.00 | 1.00 | 0     | 0     | 0     |
| BRA | Brazil | 9122 | Bela Vista Do Caroba     | 0.54 | 0.87 | 0.99 | 959   | 0     | 0     |
| BRA | Brazil | 9123 | Bela Vista Do Paraiso    | 0.30 | 0.70 | 0.90 | 7755  | 1630  | 0     |
| BRA | Brazil | 9124 | Bituruna                 | 0.71 | 0.88 | 0.99 | 1504  | 0     | 0     |
| BRA | Brazil | 9125 | Boa Esperanca            | 0.17 | 0.49 | 0.65 | 2825  | 1380  | 674   |
| BRA | Brazil | 9126 | Boa Esperanca Do Iguacu  | 0.53 | 0.83 | 0.98 | 747   | 0     | 0     |
| BRA | Brazil | 9127 | Boa Ventura De Sao Roque | 0.47 | 0.81 | 0.98 | 2221  | 0     | 0     |
| BRA | Brazil | 9128 | Boa Vista Da Aparecida   | 0.17 | 0.49 | 0.65 | 4996  | 2441  | 1192  |
| BRA | Brazil | 9129 | Bocaiuva Do Sul          | 0.24 | 0.63 | 0.88 | 6879  | 2026  | 0     |
| BRA | Brazil | 9130 | Bom Jesus Do Sul         | 0.46 | 0.87 | 1.00 | 1214  | 0     | 0     |
| BRA | Brazil | 9131 | Bom Sucesso              | 0.08 | 0.40 | 0.55 | 5056  | 2789  | 1733  |
| BRA | Brazil | 9132 | Bom Sucesso Do Sul       | 0.41 | 0.74 | 0.97 | 1203  | 174   | 0     |
| BRA | Brazil | 9133 | Borrazopolis             | 0.31 | 0.72 | 0.96 | 3711  | 624   | 0     |
| BRA | Brazil | 9134 | Braganey                 | 0.38 | 0.80 | 0.98 | 2445  | 16    | 0     |
| BRA | Brazil | 9135 | Brasilandia Do Sul       | 0.53 | 0.84 | 0.98 | 784   | 0     | 0     |
| BRA | Brazil | 9136 | Cafeara                  | 0.28 | 0.71 | 0.93 | 1507  | 251   | 0     |
| BRA | Brazil | 9137 | Cafelandia               | 0.47 | 0.88 | 1.00 | 5607  | 0     | 0     |
| BRA | Brazil | 9138 | Cafezal Do Sul           | 0.37 | 0.80 | 0.98 | 1841  | 12    | 0     |
| BRA | Brazil | 9139 | California               | 0.25 | 0.65 | 0.89 | 4634  | 1270  | 0     |
| BRA | Brazil | 9140 | Cambara                  | 0.44 | 0.74 | 0.93 | 9162  | 1544  | 0     |
| BRA | Brazil | 9141 | Cambe                    | 0.25 | 0.72 | 0.95 | 57131 | 7939  | 0     |
| BRA | Brazil | 9142 | Cambira                  | 0.28 | 0.64 | 0.87 | 4024  | 1206  | 0     |
| BRA | Brazil | 9143 | Campina Da Lagoa         | 0.36 | 0.76 | 0.98 | 6608  | 607   | 0     |
| BRA | Brazil | 9144 | Campina Do Simao         | 0.17 | 0.49 | 0.65 | 2537  | 1240  | 605   |
| BRA | Brazil | 9145 | Campina Grande Do Sul    | 0.26 | 0.66 | 0.90 | 22757 | 5936  | 0     |
| BRA | Brazil | 9146 | Campo Bonito             | 0.17 | 0.49 | 0.65 | 2667  | 1303  | 636   |
| BRA | Brazil | 9147 | Campo Do Tenente         | 0.08 | 0.40 | 0.55 | 5661  | 3123  | 1941  |
| BRA | Brazil | 9148 | Campo Largo              | 0.08 | 0.40 | 0.55 | 92458 | 51011 | 31701 |
| BRA | Brazil | 9149 | Campo Magro              | 0.22 | 0.61 | 0.83 | 14885 | 4947  | 0     |
| BRA | Brazil | 9150 | Campo Mourao             | 0.39 | 0.73 | 0.97 | 38084 | 6100  | 0     |
| BRA | Brazil | 9151 | Candido De Abreu         | 0.44 | 0.83 | 1.00 | 5741  | 0     | 0     |
| BRA | Brazil | 9152 | Candoi                   | 0.69 | 0.88 | 0.99 | 1715  | 0     | 0     |

|     |        |      |                          |      |      |      |         |        |        |
|-----|--------|------|--------------------------|------|------|------|---------|--------|--------|
| BRA | Brazil | 9153 | Cantagalo                | 0.17 | 0.49 | 0.65 | 8471    | 4139   | 2021   |
| BRA | Brazil | 9154 | Capanema                 | 0.17 | 0.49 | 0.65 | 11931   | 5830   | 2846   |
| BRA | Brazil | 9155 | Capitao Leonidas Marques | 0.37 | 0.81 | 0.98 | 6399    | 0      | 0      |
| BRA | Brazil | 9156 | Carambei                 | 0.24 | 0.64 | 0.89 | 12696   | 3520   | 0      |
| BRA | Brazil | 9157 | Carlopolis               | 0.76 | 0.89 | 0.99 | 514     | 0      | 0      |
| BRA | Brazil | 9158 | Cascavel                 | 0.17 | 0.49 | 0.65 | 200852  | 98144  | 47919  |
| BRA | Brazil | 9159 | Castro                   | 0.25 | 0.68 | 0.94 | 39086   | 8178   | 0      |
| BRA | Brazil | 9160 | Catanduvas               | 0.38 | 0.85 | 1.00 | 4296    | 0      | 0      |
| BRA | Brazil | 9161 | Centenario Do Sul        | 0.17 | 0.49 | 0.65 | 7114    | 3476   | 1697   |
| BRA | Brazil | 9162 | Cerro Azul               | 0.23 | 0.60 | 0.81 | 10126   | 3501   | 0      |
| BRA | Brazil | 9163 | Ceu Azul                 | 0.30 | 0.73 | 0.94 | 6610    | 894    | 0      |
| BRA | Brazil | 9164 | Chopinzinho              | 0.72 | 0.87 | 0.99 | 1614    | 0      | 0      |
| BRA | Brazil | 9165 | Cianorte                 | 0.30 | 0.74 | 0.97 | 39430   | 4861   | 0      |
| BRA | Brazil | 9166 | Cidade Gaucha            | 0.36 | 0.78 | 0.98 | 5463    | 278    | 0      |
| BRA | Brazil | 9167 | Clevelandia              | 0.17 | 0.49 | 0.65 | 10878   | 5315   | 2595   |
| BRA | Brazil | 9168 | Colombo                  | 0.24 | 0.62 | 0.83 | 129465  | 41798  | 0      |
| BRA | Brazil | 9169 | Colorado                 | 0.35 | 0.82 | 0.98 | 10736   | 0      | 0      |
| BRA | Brazil | 9170 | Congonhinhas             | 0.27 | 0.69 | 0.95 | 4667    | 968    | 0      |
| BRA | Brazil | 9171 | Conselheiro Mairinck     | 0.08 | 0.40 | 0.55 | 2639    | 1456   | 905    |
| BRA | Brazil | 9172 | Contenda                 | 0.19 | 0.58 | 0.80 | 11324   | 4073   | 76     |
| BRA | Brazil | 9173 | Corbelia                 | 0.38 | 0.78 | 0.97 | 7339    | 419    | 0      |
| BRA | Brazil | 9174 | Cornelio Procopio        | 0.24 | 0.69 | 0.91 | 26922   | 5332   | 0      |
| BRA | Brazil | 9175 | Coronel Domingos Soares  | 0.38 | 0.76 | 0.98 | 3166    | 294    | 0      |
| BRA | Brazil | 9176 | Coronel Vivida           | 0.64 | 0.84 | 0.99 | 3530    | 0      | 0      |
| BRA | Brazil | 9177 | Corumbatai Do Sul        | 0.30 | 0.69 | 0.94 | 2304    | 522    | 0      |
| BRA | Brazil | 9178 | Cruz Machado             | 0.50 | 0.80 | 0.98 | 5708    | 43     | 0      |
| BRA | Brazil | 9179 | Cruzeiro Do Iguacu       | 0.39 | 0.81 | 0.99 | 1780    | 0      | 0      |
| BRA | Brazil | 9180 | Cruzeiro Do Oeste        | 0.31 | 0.71 | 0.96 | 10311   | 1942   | 0      |
| BRA | Brazil | 9181 | Cruzeiro Do Sul          | 0.17 | 0.49 | 0.65 | 2827    | 1381   | 674    |
| BRA | Brazil | 9182 | Cruzmalina               | 0.17 | 0.49 | 0.65 | 1957    | 956    | 467    |
| BRA | Brazil | 9183 | Curitiba                 | 0.08 | 0.47 | 0.69 | 1350833 | 624227 | 210605 |
| BRA | Brazil | 9184 | Curiuva                  | 0.24 | 0.64 | 0.89 | 8431    | 2397   | 0      |
| BRA | Brazil | 9185 | Diamante D'oeste         | 0.41 | 0.80 | 0.99 | 2041    | 0      | 0      |

|     |        |      |                        |      |      |      |       |       |      |
|-----|--------|------|------------------------|------|------|------|-------|-------|------|
| BRA | Brazil | 9186 | Diamante Do Norte      | 0.40 | 0.83 | 0.97 | 2164  | 0     | 0    |
| BRA | Brazil | 9187 | Diamante Do Sul        | 0.42 | 0.83 | 0.99 | 1302  | 0     | 0    |
| BRA | Brazil | 9188 | Dois Vizinhos          | 0.45 | 0.79 | 0.98 | 13697 | 492   | 0    |
| BRA | Brazil | 9189 | Douradina              | 0.17 | 0.49 | 0.65 | 5335  | 2607  | 1273 |
| BRA | Brazil | 9190 | Doutor Camargo         | 0.22 | 0.64 | 0.88 | 3540  | 993   | 0    |
| BRA | Brazil | 9191 | Doutor Ulysses         | 0.24 | 0.59 | 0.76 | 3243  | 1241  | 229  |
| BRA | Brazil | 9192 | Eneas Marques          | 0.35 | 0.80 | 0.96 | 2744  | 0     | 0    |
| BRA | Brazil | 9193 | Engenheiro Beltrao     | 0.39 | 0.81 | 0.97 | 5901  | 0     | 0    |
| BRA | Brazil | 9194 | Entre Rios Do Oeste    | 0.24 | 0.62 | 0.85 | 2530  | 813   | 0    |
| BRA | Brazil | 9195 | Esperanca Nova         | 0.38 | 0.78 | 0.96 | 777   | 28    | 0    |
| BRA | Brazil | 9196 | Espigao Alto Do Iguacu | 0.41 | 0.81 | 0.99 | 1832  | 0     | 0    |
| BRA | Brazil | 9197 | Farol                  | 0.41 | 0.77 | 0.97 | 1300  | 116   | 0    |
| BRA | Brazil | 9198 | Faxinal                | 0.08 | 0.40 | 0.55 | 12744 | 7031  | 4370 |
| BRA | Brazil | 9199 | Fazenda Rio Grande     | 0.25 | 0.64 | 0.87 | 52846 | 15846 | 0    |
| BRA | Brazil | 9200 | Fenix                  | 0.31 | 0.73 | 0.96 | 2382  | 344   | 0    |
| BRA | Brazil | 9201 | Fernandes Pinheiro     | 0.40 | 0.73 | 0.91 | 2424  | 407   | 0    |
| BRA | Brazil | 9202 | Figueira               | 0.25 | 0.65 | 0.90 | 4407  | 1204  | 0    |
| BRA | Brazil | 9203 | Flor Da Serra Do Sul   | 0.52 | 0.87 | 1.00 | 1194  | 0     | 0    |
| BRA | Brazil | 9204 | Florai                 | 0.39 | 0.78 | 0.95 | 2099  | 87    | 0    |
| BRA | Brazil | 9205 | Floresta               | 0.23 | 0.69 | 0.92 | 3786  | 732   | 0    |
| BRA | Brazil | 9206 | Florestopolis          | 0.27 | 0.70 | 0.92 | 5920  | 1064  | 0    |
| BRA | Brazil | 9207 | Florida                | 0.39 | 0.78 | 0.91 | 1110  | 59    | 0    |
| BRA | Brazil | 9208 | Formosa Do Oeste       | 0.36 | 0.79 | 0.96 | 3187  | 105   | 0    |
| BRA | Brazil | 9209 | Foz Do Iguacu          | 0.50 | 0.85 | 1.00 | 76447 | 0     | 0    |
| BRA | Brazil | 9210 | Foz Do Jordao          | 0.51 | 0.84 | 1.00 | 1537  | 0     | 0    |
| BRA | Brazil | 9211 | Francisco Alves        | 0.34 | 0.75 | 0.97 | 2911  | 335   | 0    |
| BRA | Brazil | 9212 | Francisco Beltrao      | 0.33 | 0.73 | 0.96 | 41596 | 6215  | 0    |
| BRA | Brazil | 9213 | General Carneiro       | 0.08 | 0.40 | 0.55 | 9971  | 5501  | 3419 |
| BRA | Brazil | 9214 | Godoy Moreira          | 0.81 | 0.92 | 0.99 | 0     | 0     | 0    |
| BRA | Brazil | 9215 | Goioere                | 0.38 | 0.76 | 0.96 | 12582 | 1295  | 0    |
| BRA | Brazil | 9216 | Goioxim                | 0.45 | 0.81 | 1.00 | 2619  | 0     | 0    |
| BRA | Brazil | 9217 | Grandes Rios           | 0.36 | 0.76 | 0.99 | 2696  | 274   | 0    |
| BRA | Brazil | 9218 | Guaira                 | 0.58 | 0.93 | 1.00 | 7172  | 0     | 0    |

|     |        |      |                   |      |      |      |        |       |       |
|-----|--------|------|-------------------|------|------|------|--------|-------|-------|
| BRA | Brazil | 9219 | Guairaca          | 0.42 | 0.83 | 0.98 | 2469   | 0     | 0     |
| BRA | Brazil | 9220 | Guamiranga        | 0.42 | 0.84 | 1.00 | 2860   | 0     | 0     |
| BRA | Brazil | 9221 | Guapirama         | 0.64 | 0.88 | 1.00 | 613    | 0     | 0     |
| BRA | Brazil | 9222 | Guaporema         | 0.30 | 0.73 | 0.96 | 1152   | 160   | 0     |
| BRA | Brazil | 9223 | Guaraci           | 0.67 | 0.97 | 1.00 | 708    | 0     | 0     |
| BRA | Brazil | 9224 | Guaraniacu        | 0.46 | 0.82 | 0.97 | 4784   | 0     | 0     |
| BRA | Brazil | 9225 | Guarapuava        | 0.17 | 0.49 | 0.65 | 113346 | 55385 | 27041 |
| BRA | Brazil | 9226 | Guaraquecaba      | 0.08 | 0.40 | 0.55 | 5476   | 3021  | 1878  |
| BRA | Brazil | 9227 | Guaratuba         | 0.22 | 0.65 | 0.92 | 20818  | 5243  | 0     |
| BRA | Brazil | 9228 | Honorio Serpa     | 0.38 | 0.73 | 0.98 | 2510   | 414   | 0     |
| BRA | Brazil | 9229 | Ibaiti            | 0.24 | 0.66 | 0.92 | 17283  | 4415  | 0     |
| BRA | Brazil | 9230 | Ibema             | 0.40 | 0.77 | 0.98 | 2601   | 218   | 0     |
| BRA | Brazil | 9231 | Ibipora           | 0.23 | 0.68 | 0.94 | 30978  | 6214  | 0     |
| BRA | Brazil | 9232 | Icaraima          | 0.36 | 0.82 | 0.99 | 3730   | 0     | 0     |
| BRA | Brazil | 9233 | Iguaracu          | 0.32 | 0.70 | 0.92 | 2094   | 434   | 0     |
| BRA | Brazil | 9234 | Iguatu            | 0.17 | 0.49 | 0.65 | 1795   | 877   | 428   |
| BRA | Brazil | 9235 | Imbau             | 0.24 | 0.62 | 0.85 | 7082   | 2242  | 0     |
| BRA | Brazil | 9236 | Imbituva          | 0.41 | 0.76 | 0.95 | 12762  | 1384  | 0     |
| BRA | Brazil | 9237 | Inacio Martins    | 0.47 | 0.79 | 0.99 | 3710   | 101   | 0     |
| BRA | Brazil | 9238 | Inaja             | 0.35 | 0.77 | 0.98 | 1411   | 92    | 0     |
| BRA | Brazil | 9239 | Indianapolis      | 0.17 | 0.49 | 0.65 | 2806   | 1371  | 669   |
| BRA | Brazil | 9240 | Ipiranga          | 0.28 | 0.73 | 0.95 | 7830   | 1100  | 0     |
| BRA | Brazil | 9241 | Ipora             | 0.17 | 0.49 | 0.65 | 9264   | 4527  | 2210  |
| BRA | Brazil | 9242 | Iracema Do Oeste  | 0.48 | 0.84 | 0.97 | 806    | 0     | 0     |
| BRA | Brazil | 9243 | Irati             | 0.61 | 0.83 | 0.98 | 11203  | 0     | 0     |
| BRA | Brazil | 9244 | Iretama           | 0.29 | 0.67 | 0.89 | 5378   | 1409  | 0     |
| BRA | Brazil | 9245 | Itaguaje          | 0.34 | 0.76 | 0.97 | 2139   | 183   | 0     |
| BRA | Brazil | 9246 | Itaipulandia      | 0.32 | 0.78 | 0.97 | 5183   | 209   | 0     |
| BRA | Brazil | 9247 | Itambaraca        | 0.39 | 0.81 | 0.95 | 2802   | 0     | 0     |
| BRA | Brazil | 9248 | Itambe            | 0.08 | 0.40 | 0.55 | 4485   | 2474  | 1538  |
| BRA | Brazil | 9249 | Itapejara D'oeste | 0.17 | 0.49 | 0.65 | 7393   | 3612  | 1764  |
| BRA | Brazil | 9250 | Itaperucu         | 0.46 | 0.75 | 0.97 | 8271   | 1329  | 0     |
| BRA | Brazil | 9251 | Itauna Do Sul     | 0.41 | 0.84 | 1.00 | 1276   | 0     | 0     |

|     |        |      |                    |      |      |      |        |       |      |
|-----|--------|------|--------------------|------|------|------|--------|-------|------|
| BRA | Brazil | 9252 | Ivai               | 0.28 | 0.69 | 0.96 | 7067   | 1520  | 0    |
| BRA | Brazil | 9253 | Ivaipora           | 0.41 | 0.79 | 0.99 | 12678  | 243   | 0    |
| BRA | Brazil | 9254 | Ivate              | 0.39 | 0.77 | 0.98 | 3350   | 203   | 0    |
| BRA | Brazil | 9255 | Ivatuba            | 0.23 | 0.67 | 0.86 | 1760   | 386   | 0    |
| BRA | Brazil | 9256 | Jaboti             | 0.47 | 0.78 | 0.96 | 1760   | 122   | 0    |
| BRA | Brazil | 9257 | Jacarezinho        | 0.43 | 0.79 | 0.99 | 14664  | 326   | 0    |
| BRA | Brazil | 9258 | Jaguapita          | 0.25 | 0.70 | 0.93 | 7325   | 1349  | 0    |
| BRA | Brazil | 9259 | Jaguariaiva        | 0.33 | 0.71 | 0.93 | 16367  | 3092  | 0    |
| BRA | Brazil | 9260 | Jandaia Do Sul     | 0.29 | 0.73 | 0.93 | 10703  | 1571  | 0    |
| BRA | Brazil | 9261 | Janiopolis         | 0.36 | 0.81 | 0.99 | 2558   | 0     | 0    |
| BRA | Brazil | 9262 | Japira             | 0.31 | 0.72 | 0.94 | 2579   | 411   | 0    |
| BRA | Brazil | 9263 | Japura             | 0.17 | 0.49 | 0.65 | 5837   | 2852  | 1393 |
| BRA | Brazil | 9264 | Jardim Alegre      | 0.51 | 0.82 | 0.98 | 3459   | 0     | 0    |
| BRA | Brazil | 9265 | Jardim Olinda      | 0.54 | 0.85 | 0.98 | 351    | 0     | 0    |
| BRA | Brazil | 9266 | Jataizinho         | 0.30 | 0.76 | 0.96 | 6001   | 469   | 0    |
| BRA | Brazil | 9267 | Jesuítas           | 0.38 | 0.81 | 0.97 | 3798   | 0     | 0    |
| BRA | Brazil | 9268 | Joaquim Tavora     | 0.31 | 0.74 | 0.98 | 5690   | 737   | 0    |
| BRA | Brazil | 9269 | Jundiá Do Sul      | 0.35 | 0.74 | 0.95 | 1475   | 188   | 0    |
| BRA | Brazil | 9270 | Juranda            | 0.50 | 0.81 | 0.97 | 2244   | 0     | 0    |
| BRA | Brazil | 9271 | Jussara            | 0.17 | 0.49 | 0.65 | 4439   | 2169  | 1059 |
| BRA | Brazil | 9272 | Kalore             | 0.08 | 0.40 | 0.55 | 3192   | 1761  | 1094 |
| BRA | Brazil | 9273 | Lapa               | 0.21 | 0.62 | 0.88 | 28499  | 8835  | 0    |
| BRA | Brazil | 9274 | Laranjal           | 0.17 | 0.49 | 0.65 | 4619   | 2257  | 1102 |
| BRA | Brazil | 9275 | Laranjeiras Do Sul | 0.44 | 0.85 | 1.00 | 11262  | 0     | 0    |
| BRA | Brazil | 9276 | Leópolis           | 0.35 | 0.70 | 0.90 | 1892   | 409   | 0    |
| BRA | Brazil | 9277 | Lidianópolis       | 0.43 | 0.82 | 0.99 | 1454   | 0     | 0    |
| BRA | Brazil | 9278 | Lindoeste          | 0.34 | 0.77 | 0.99 | 2316   | 153   | 0    |
| BRA | Brazil | 9279 | Loanda             | 0.30 | 0.70 | 0.94 | 11688  | 2299  | 0    |
| BRA | Brazil | 9280 | Lobato             | 0.24 | 0.70 | 0.92 | 2640   | 496   | 0    |
| BRA | Brazil | 9281 | Londrina           | 0.23 | 0.68 | 0.92 | 318926 | 67926 | 0    |
| BRA | Brazil | 9282 | Luiziana           | 0.45 | 0.80 | 0.99 | 2588   | 17    | 0    |
| BRA | Brazil | 9283 | Lunardelli         | 0.40 | 0.82 | 0.98 | 1989   | 0     | 0    |
| BRA | Brazil | 9284 | Lupionópolis       | 0.39 | 0.75 | 0.96 | 2016   | 236   | 0    |

|     |        |      |                           |      |      |      |        |       |      |
|-----|--------|------|---------------------------|------|------|------|--------|-------|------|
| BRA | Brazil | 9285 | Mallet                    | 0.47 | 0.77 | 0.95 | 4726   | 458   | 0    |
| BRA | Brazil | 9286 | Mambore                   | 0.55 | 0.82 | 0.99 | 3439   | 0     | 0    |
| BRA | Brazil | 9287 | Mandaguacu                | 0.24 | 0.71 | 0.94 | 12577  | 1986  | 0    |
| BRA | Brazil | 9288 | Mandaguari                | 0.08 | 0.40 | 0.55 | 24923  | 13750 | 8545 |
| BRA | Brazil | 9289 | Mandirituba               | 0.23 | 0.63 | 0.88 | 15075  | 4487  | 0    |
| BRA | Brazil | 9290 | Manfrinopolis             | 0.35 | 0.79 | 0.98 | 1352   | 39    | 0    |
| BRA | Brazil | 9291 | Mangueirinha              | 0.49 | 0.81 | 0.99 | 5313   | 0     | 0    |
| BRA | Brazil | 9292 | Manoel Ribas              | 0.34 | 0.81 | 1.00 | 6183   | 0     | 0    |
| BRA | Brazil | 9293 | Marechal Candido Rondon   | 0.35 | 0.78 | 0.97 | 22881  | 1103  | 0    |
| BRA | Brazil | 9294 | Maria Helena              | 0.32 | 0.75 | 0.95 | 2874   | 269   | 0    |
| BRA | Brazil | 9295 | Marialva                  | 0.33 | 0.79 | 0.96 | 16288  | 466   | 0    |
| BRA | Brazil | 9296 | Marilandia Do Sul         | 0.33 | 0.70 | 0.90 | 4280   | 946   | 0    |
| BRA | Brazil | 9297 | Marilena                  | 0.42 | 0.83 | 0.99 | 2654   | 0     | 0    |
| BRA | Brazil | 9298 | Mariluz                   | 0.33 | 0.74 | 0.98 | 4973   | 659   | 0    |
| BRA | Brazil | 9299 | Maringa                   | 0.25 | 0.75 | 0.95 | 227006 | 21865 | 0    |
| BRA | Brazil | 9300 | Mariopolis                | 0.41 | 0.72 | 0.95 | 2550   | 503   | 0    |
| BRA | Brazil | 9301 | Maripa                    | 0.41 | 0.81 | 0.97 | 2310   | 0     | 0    |
| BRA | Brazil | 9302 | Marmeleiro                | 0.29 | 0.75 | 0.97 | 7754   | 804   | 0    |
| BRA | Brazil | 9303 | Marquinho                 | 0.48 | 0.87 | 1.00 | 1524   | 0     | 0    |
| BRA | Brazil | 9304 | Marumbi                   | 0.21 | 0.65 | 0.91 | 2802   | 719   | 0    |
| BRA | Brazil | 9305 | Matelandia                | 0.17 | 0.49 | 0.65 | 9925   | 4850  | 2368 |
| BRA | Brazil | 9306 | Matinhos                  | 0.20 | 0.64 | 0.91 | 19893  | 5497  | 0    |
| BRA | Brazil | 9307 | Mato Rico                 | 0.48 | 0.82 | 0.98 | 1162   | 0     | 0    |
| BRA | Brazil | 9308 | Maua Da Serra             | 0.25 | 0.64 | 0.88 | 5272   | 1537  | 0    |
| BRA | Brazil | 9309 | Medianeira                | 0.44 | 0.80 | 0.99 | 15890  | 181   | 0    |
| BRA | Brazil | 9310 | Mercedes                  | 0.41 | 0.82 | 0.98 | 2128   | 0     | 0    |
| BRA | Brazil | 9311 | Mirador                   | 0.17 | 0.49 | 0.65 | 1395   | 682   | 333  |
| BRA | Brazil | 9312 | Miraselva                 | 0.32 | 0.69 | 0.92 | 888    | 201   | 0    |
| BRA | Brazil | 9313 | Missal                    | 0.36 | 0.82 | 0.97 | 4816   | 0     | 0    |
| BRA | Brazil | 9314 | Moreira Sales             | 0.17 | 0.49 | 0.65 | 7628   | 3727  | 1820 |
| BRA | Brazil | 9315 | Morretes                  | 0.22 | 0.60 | 0.82 | 9516   | 3271  | 0    |
| BRA | Brazil | 9316 | Munhoz De Melo            | 0.30 | 0.73 | 0.91 | 1963   | 275   | 0    |
| BRA | Brazil | 9317 | Nossa Senhora Das Gracias | 0.21 | 0.65 | 0.89 | 2337   | 608   | 0    |

|     |        |      |                            |      |      |      |       |       |      |
|-----|--------|------|----------------------------|------|------|------|-------|-------|------|
| BRA | Brazil | 9318 | Nova Alianca Do Ivai       | 0.52 | 0.83 | 0.99 | 435   | 0     | 0    |
| BRA | Brazil | 9319 | Nova America Da Colina     | 0.48 | 0.78 | 0.96 | 1100  | 85    | 0    |
| BRA | Brazil | 9320 | Nova Aurora                | 0.17 | 0.49 | 0.65 | 7397  | 3614  | 1765 |
| BRA | Brazil | 9321 | Nova Cantu                 | 0.51 | 0.80 | 0.97 | 1894  | 3     | 0    |
| BRA | Brazil | 9322 | Nova Esperanca             | 0.35 | 0.80 | 0.97 | 12670 | 34    | 0    |
| BRA | Brazil | 9323 | Nova Esperanca Do Sudoeste | 0.39 | 0.77 | 0.99 | 2119  | 179   | 0    |
| BRA | Brazil | 9324 | Nova Fatima                | 0.08 | 0.40 | 0.55 | 5990  | 3305  | 2054 |
| BRA | Brazil | 9325 | Nova Laranjeiras           | 0.39 | 0.84 | 1.00 | 5051  | 0     | 0    |
| BRA | Brazil | 9326 | Nova Londrina              | 0.36 | 0.79 | 0.98 | 5865  | 143   | 0    |
| BRA | Brazil | 9327 | Nova Olimpia               | 0.17 | 0.49 | 0.65 | 3633  | 1775  | 867  |
| BRA | Brazil | 9328 | Nova Prata Do Iguacu       | 0.47 | 0.80 | 0.98 | 3512  | 0     | 0    |
| BRA | Brazil | 9329 | Nova Santa Barbara         | 0.46 | 0.77 | 0.96 | 1435  | 119   | 0    |
| BRA | Brazil | 9330 | Nova Santa Rosa            | 0.46 | 0.83 | 0.98 | 2736  | 0     | 0    |
| BRA | Brazil | 9331 | Nova Tebas                 | 0.59 | 0.83 | 0.98 | 1435  | 0     | 0    |
| BRA | Brazil | 9332 | Novo Itacolomi             | 0.30 | 0.66 | 0.88 | 1462  | 404   | 0    |
| BRA | Brazil | 9333 | Ortigueira                 | 0.38 | 0.72 | 0.94 | 9790  | 1942  | 0    |
| BRA | Brazil | 9334 | Ourizona                   | 0.31 | 0.73 | 0.92 | 1714  | 231   | 0    |
| BRA | Brazil | 9335 | Ouro Verde Do Oeste        | 0.36 | 0.78 | 0.98 | 2648  | 117   | 0    |
| BRA | Brazil | 9336 | Paicandu                   | 0.25 | 0.74 | 0.98 | 20305 | 2289  | 0    |
| BRA | Brazil | 9337 | Palmas                     | 0.99 | 1.00 | 1.00 | 0     | 0     | 0    |
| BRA | Brazil | 9338 | Palmeira                   | 0.26 | 0.75 | 0.98 | 18246 | 1766  | 0    |
| BRA | Brazil | 9339 | Palmital                   | 0.64 | 0.97 | 1.00 | 2133  | 0     | 0    |
| BRA | Brazil | 9340 | Palotina                   | 0.40 | 0.78 | 0.99 | 12239 | 687   | 0    |
| BRA | Brazil | 9341 | Paraiso Do Norte           | 0.46 | 0.77 | 0.97 | 4540  | 421   | 0    |
| BRA | Brazil | 9342 | Paranacity                 | 0.17 | 0.49 | 0.65 | 7144  | 3491  | 1704 |
| BRA | Brazil | 9343 | Paranagua                  | 0.23 | 0.66 | 0.91 | 83636 | 20963 | 0    |
| BRA | Brazil | 9344 | Paranapoema                | 0.35 | 0.77 | 0.98 | 1406  | 102   | 0    |
| BRA | Brazil | 9345 | Paranavai                  | 0.31 | 0.80 | 0.99 | 42831 | 335   | 0    |
| BRA | Brazil | 9346 | Pato Bragado               | 0.50 | 0.82 | 0.98 | 1571  | 0     | 0    |
| BRA | Brazil | 9347 | Pato Branco                | 0.56 | 0.81 | 0.98 | 18914 | 0     | 0    |
| BRA | Brazil | 9348 | Paula Freitas              | 0.60 | 0.80 | 0.91 | 1181  | 0     | 0    |
| BRA | Brazil | 9349 | Paulo Frontin              | 0.63 | 0.78 | 0.87 | 1229  | 162   | 0    |
| BRA | Brazil | 9350 | Peabiru                    | 0.39 | 0.75 | 0.96 | 5824  | 737   | 0    |

|     |        |      |                           |      |      |      |        |        |       |
|-----|--------|------|---------------------------|------|------|------|--------|--------|-------|
| BRA | Brazil | 9351 | Perobal                   | 0.39 | 0.77 | 0.96 | 2642   | 199    | 0     |
| BRA | Brazil | 9352 | Perola                    | 0.28 | 0.67 | 0.93 | 5742   | 1389   | 0     |
| BRA | Brazil | 9353 | Perola D'oeste            | 0.17 | 0.49 | 0.65 | 4451   | 2175   | 1062  |
| BRA | Brazil | 9354 | Pien                      | 0.08 | 0.40 | 0.55 | 9109   | 5025   | 3123  |
| BRA | Brazil | 9355 | Pinhais                   | 0.22 | 0.63 | 0.88 | 79434  | 23009  | 0     |
| BRA | Brazil | 9356 | Pinhal De Sao Bento       | 0.43 | 0.84 | 0.99 | 1020   | 0      | 0     |
| BRA | Brazil | 9357 | Pinhalao                  | 0.48 | 0.83 | 0.98 | 2009   | 0      | 0     |
| BRA | Brazil | 9358 | Pinhao                    | 0.38 | 0.76 | 0.99 | 13326  | 1263   | 0     |
| BRA | Brazil | 9359 | Pirai Do Sul              | 0.08 | 0.40 | 0.55 | 18118  | 9996   | 6212  |
| BRA | Brazil | 9360 | Piraquara                 | 0.23 | 0.62 | 0.84 | 68557  | 21971  | 0     |
| BRA | Brazil | 9361 | Pitanga                   | 0.82 | 0.93 | 0.99 | 0      | 0      | 0     |
| BRA | Brazil | 9362 | Pitangueiras              | 1.00 | 1.00 | 1.00 | 0      | 0      | 0     |
| BRA | Brazil | 9363 | Planaltina Do Parana      | 0.34 | 0.78 | 0.98 | 1973   | 105    | 0     |
| BRA | Brazil | 9364 | Planalto                  | 0.17 | 0.49 | 0.65 | 8683   | 4243   | 2071  |
| BRA | Brazil | 9365 | Ponta Grossa              | 0.08 | 0.40 | 0.55 | 247848 | 136744 | 84979 |
| BRA | Brazil | 9366 | Pontal Do Parana          | 0.20 | 0.63 | 0.90 | 15121  | 4383   | 0     |
| BRA | Brazil | 9367 | Porecatu                  | 0.38 | 0.76 | 0.97 | 5753   | 496    | 0     |
| BRA | Brazil | 9368 | Porto Amazonas            | 0.53 | 0.78 | 0.96 | 1223   | 99     | 0     |
| BRA | Brazil | 9369 | Porto Barreiro            | 0.53 | 0.87 | 1.00 | 965    | 0      | 0     |
| BRA | Brazil | 9370 | Porto Rico                | 0.36 | 0.78 | 0.97 | 1151   | 62     | 0     |
| BRA | Brazil | 9371 | Porto Vitoria             | 0.59 | 0.78 | 0.92 | 812    | 92     | 0     |
| BRA | Brazil | 9372 | Prado Ferreira            | 0.60 | 0.82 | 0.94 | 757    | 0      | 0     |
| BRA | Brazil | 9373 | Pranchita                 | 0.71 | 0.88 | 0.98 | 526    | 0      | 0     |
| BRA | Brazil | 9374 | Presidente Castelo Branco | 0.34 | 0.76 | 0.93 | 2405   | 217    | 0     |
| BRA | Brazil | 9375 | Primeiro De Maio          | 0.31 | 0.72 | 0.95 | 5465   | 946    | 0     |
| BRA | Brazil | 9376 | Prudentopolis             | 0.44 | 0.83 | 0.99 | 18908  | 0      | 0     |
| BRA | Brazil | 9377 | Quarto Centenario         | 0.45 | 0.80 | 0.97 | 1738   | 0      | 0     |
| BRA | Brazil | 9378 | Quatigua                  | 0.17 | 0.49 | 0.65 | 4728   | 2311   | 1128  |
| BRA | Brazil | 9379 | Quatro Barras             | 0.22 | 0.64 | 0.90 | 12754  | 3403   | 0     |
| BRA | Brazil | 9380 | Quatro Pontes             | 0.28 | 0.70 | 0.94 | 2713   | 531    | 0     |
| BRA | Brazil | 9381 | Quedas Do Iguacu          | 0.34 | 0.78 | 0.99 | 15200  | 510    | 0     |
| BRA | Brazil | 9382 | Querencia Do Norte        | 0.36 | 0.81 | 0.99 | 5371   | 0      | 0     |
| BRA | Brazil | 9383 | Quinta Do Sol             | 0.17 | 0.49 | 0.65 | 3106   | 1518   | 741   |



|     |        |      |                             |      |      |      |       |       |      |
|-----|--------|------|-----------------------------|------|------|------|-------|-------|------|
| BRA | Brazil | 9384 | Quitandinha                 | 0.24 | 0.66 | 0.92 | 10164 | 2611  | 0    |
| BRA | Brazil | 9385 | Ramilandia                  | 0.35 | 0.75 | 0.96 | 2455  | 282   | 0    |
| BRA | Brazil | 9386 | Rancho Alegre               | 0.31 | 0.72 | 0.93 | 1951  | 321   | 0    |
| BRA | Brazil | 9387 | Rancho Alegre D'oeste       | 0.39 | 0.77 | 0.97 | 1169  | 92    | 0    |
| BRA | Brazil | 9388 | Realeza                     | 0.36 | 0.76 | 0.97 | 7582  | 713   | 0    |
| BRA | Brazil | 9389 | Reboucas                    | 0.42 | 0.74 | 0.94 | 5672  | 960   | 0    |
| BRA | Brazil | 9390 | Renascenca                  | 0.31 | 0.75 | 0.97 | 4037  | 378   | 0    |
| BRA | Brazil | 9391 | Reserva                     | 0.32 | 0.76 | 0.99 | 12714 | 1115  | 0    |
| BRA | Brazil | 9392 | Reserva Do Iguacu           | 0.63 | 0.87 | 1.00 | 1368  | 0     | 0    |
| BRA | Brazil | 9393 | Ribeirao Claro              | 0.81 | 0.92 | 0.99 | 0     | 0     | 0    |
| BRA | Brazil | 9394 | Ribeirao Do Pinhal          | 0.40 | 0.75 | 0.95 | 5450  | 656   | 0    |
| BRA | Brazil | 9395 | Rio Azul                    | 0.44 | 0.76 | 0.95 | 5148  | 583   | 0    |
| BRA | Brazil | 9396 | Rio Bom                     | 0.39 | 0.77 | 0.93 | 1368  | 100   | 0    |
| BRA | Brazil | 9397 | Rio Bonito Do Iguacu        | 0.48 | 0.86 | 1.00 | 4417  | 0     | 0    |
| BRA | Brazil | 9398 | Rio Branco Do Ivai          | 0.17 | 0.49 | 0.65 | 2208  | 1079  | 527  |
| BRA | Brazil | 9399 | Rio Branco Do Sul           | 0.08 | 0.40 | 0.55 | 24838 | 13704 | 8516 |
| BRA | Brazil | 9400 | Rio Negro                   | 0.08 | 0.40 | 0.55 | 24047 | 13268 | 8245 |
| BRA | Brazil | 9401 | Rolandia                    | 0.23 | 0.68 | 0.92 | 37245 | 7936  | 0    |
| BRA | Brazil | 9402 | Roncador                    | 0.51 | 0.79 | 0.97 | 3193  | 78    | 0    |
| BRA | Brazil | 9403 | Rondon                      | 0.30 | 0.73 | 0.98 | 4834  | 630   | 0    |
| BRA | Brazil | 9404 | Rosario Do Ivai             | 0.53 | 0.80 | 0.98 | 1607  | 12    | 0    |
| BRA | Brazil | 9405 | Sabaudia                    | 0.29 | 0.65 | 0.88 | 3410  | 969   | 0    |
| BRA | Brazil | 9406 | Salgado Filho               | 0.49 | 0.83 | 0.97 | 1287  | 0     | 0    |
| BRA | Brazil | 9407 | Salto Do Itarare            | 0.95 | 0.96 | 0.98 | 0     | 0     | 0    |
| BRA | Brazil | 9408 | Salto Do Lontra             | 0.34 | 0.75 | 0.97 | 6776  | 695   | 0    |
| BRA | Brazil | 9409 | Santa Amelia                | 0.31 | 0.72 | 0.95 | 1783  | 280   | 0    |
| BRA | Brazil | 9410 | Santa Cecilia Do Pavao      | 0.48 | 0.76 | 0.93 | 1119  | 147   | 0    |
| BRA | Brazil | 9411 | Santa Cruz De Monte Castelo | 0.35 | 0.78 | 0.98 | 3645  | 197   | 0    |
| BRA | Brazil | 9412 | Santa Fe                    | 0.30 | 0.71 | 0.90 | 5876  | 1083  | 0    |
| BRA | Brazil | 9413 | Santa Helena                | 0.17 | 0.49 | 0.65 | 16206 | 7919  | 3866 |
| BRA | Brazil | 9414 | Santa Ines                  | 0.17 | 0.49 | 0.65 | 1098  | 536   | 262  |
| BRA | Brazil | 9415 | Santa Isabel Do Ivai        | 0.34 | 0.77 | 0.97 | 3834  | 222   | 0    |
| BRA | Brazil | 9416 | Santa Izabel Do Oeste       | 0.45 | 0.81 | 0.97 | 4983  | 0     | 0    |

|     |        |      |                           |      |      |      |        |       |     |
|-----|--------|------|---------------------------|------|------|------|--------|-------|-----|
| BRA | Brazil | 9417 | Santa Lucia               | 0.35 | 0.75 | 0.96 | 2100   | 248   | 0   |
| BRA | Brazil | 9418 | Santa Maria Do Oeste      | 0.51 | 0.79 | 0.98 | 3118   | 60    | 0   |
| BRA | Brazil | 9419 | Santa Mariana             | 0.47 | 0.75 | 0.93 | 4133   | 645   | 0   |
| BRA | Brazil | 9420 | Santa Monica              | 0.44 | 0.80 | 0.98 | 1421   | 0     | 0   |
| BRA | Brazil | 9421 | Santa Tereza Do Oeste     | 0.34 | 0.79 | 0.99 | 4845   | 146   | 0   |
| BRA | Brazil | 9422 | Santa Terezinha De Itaipu | 0.34 | 0.75 | 0.97 | 13587  | 1378  | 0   |
| BRA | Brazil | 9423 | Santana Do Itarare        | 0.85 | 0.93 | 0.98 | 0      | 0     | 0   |
| BRA | Brazil | 9424 | Santo Antonio Da Platina  | 0.31 | 0.74 | 0.97 | 22278  | 2902  | 0   |
| BRA | Brazil | 9425 | Santo Antonio Do Caiua    | 0.41 | 0.82 | 0.98 | 1076   | 0     | 0   |
| BRA | Brazil | 9426 | Santo Antonio Do Paraiso  | 0.53 | 0.78 | 0.94 | 616    | 35    | 0   |
| BRA | Brazil | 9427 | Santo Antonio Do Sudoeste | 0.41 | 0.79 | 1.00 | 5087   | 78    | 0   |
| BRA | Brazil | 9428 | Santo Inacio              | 0.40 | 0.82 | 0.98 | 2178   | 0     | 0   |
| BRA | Brazil | 9429 | Sao Carlos Do Ivai        | 0.36 | 0.74 | 0.97 | 2956   | 385   | 0   |
| BRA | Brazil | 9430 | Sao Jeronimo Da Serra     | 0.27 | 0.71 | 0.96 | 6057   | 988   | 0   |
| BRA | Brazil | 9431 | Sao Joao                  | 0.36 | 0.69 | 0.94 | 4680   | 1205  | 0   |
| BRA | Brazil | 9432 | Sao Joao Do Caiua         | 0.33 | 0.77 | 0.98 | 2796   | 176   | 0   |
| BRA | Brazil | 9433 | Sao Joao Do Ivai          | 0.39 | 0.74 | 0.98 | 4570   | 631   | 0   |
| BRA | Brazil | 9434 | Sao Joao Do Triunfo       | 0.22 | 0.62 | 0.86 | 8596   | 2667  | 0   |
| BRA | Brazil | 9435 | Sao Jorge D'oste          | 0.42 | 0.77 | 0.97 | 3536   | 249   | 0   |
| BRA | Brazil | 9436 | Sao Jorge Do Ivai         | 0.48 | 0.78 | 0.96 | 1827   | 120   | 0   |
| BRA | Brazil | 9437 | Sao Jorge Do Patrocinio   | 0.35 | 0.75 | 0.96 | 2693   | 277   | 0   |
| BRA | Brazil | 9438 | Sao Jose Da Boa Vista     | 0.75 | 0.88 | 0.98 | 314    | 0     | 0   |
| BRA | Brazil | 9439 | Sao Jose Das Palmeiras    | 0.17 | 0.49 | 0.65 | 2378   | 1162  | 567 |
| BRA | Brazil | 9440 | Sao Jose Dos Pinhais      | 0.21 | 0.63 | 0.91 | 183399 | 51734 | 0   |
| BRA | Brazil | 9441 | Sao Manoel Do Parana      | 0.48 | 0.78 | 0.96 | 667    | 34    | 0   |
| BRA | Brazil | 9442 | Sao Mateus Do Sul         | 0.54 | 0.77 | 0.93 | 11959  | 1320  | 0   |
| BRA | Brazil | 9443 | Sao Miguel Do Iguacu      | 0.30 | 0.75 | 0.98 | 13711  | 1281  | 0   |
| BRA | Brazil | 9444 | Sao Pedro Do Iguacu       | 0.43 | 0.80 | 0.97 | 2272   | 0     | 0   |
| BRA | Brazil | 9445 | Sao Pedro Do Ivai         | 0.25 | 0.65 | 0.90 | 5997   | 1668  | 0   |
| BRA | Brazil | 9446 | Sao Pedro Do Parana       | 0.47 | 0.81 | 0.97 | 827    | 0     | 0   |
| BRA | Brazil | 9447 | Sao Sebastiao Da Amoreira | 0.31 | 0.71 | 0.93 | 4377   | 854   | 0   |
| BRA | Brazil | 9448 | Sao Tome                  | 0.46 | 0.82 | 0.98 | 1976   | 0     | 0   |
| BRA | Brazil | 9449 | Sapopema                  | 0.44 | 0.72 | 0.90 | 2425   | 565   | 0   |

|     |        |      |                        |      |      |      |       |       |       |
|-----|--------|------|------------------------|------|------|------|-------|-------|-------|
| BRA | Brazil | 9450 | Sarandi                | 0.25 | 0.77 | 0.98 | 50420 | 2801  | 0     |
| BRA | Brazil | 9451 | Saudade Do Iguacu      | 0.55 | 0.80 | 0.98 | 1319  | 24    | 0     |
| BRA | Brazil | 9452 | Senges                 | 0.41 | 0.81 | 1.00 | 7594  | 0     | 0     |
| BRA | Brazil | 9453 | Serranopolis Do Iguacu | 0.39 | 0.80 | 0.97 | 1898  | 8     | 0     |
| BRA | Brazil | 9454 | Sertaneja              | 0.29 | 0.71 | 0.95 | 2901  | 511   | 0     |
| BRA | Brazil | 9455 | Sertanopolis           | 0.50 | 0.75 | 0.89 | 4970  | 781   | 0     |
| BRA | Brazil | 9456 | Siqueira Campos        | 0.72 | 0.86 | 0.97 | 1526  | 0     | 0     |
| BRA | Brazil | 9457 | Sulina                 | 0.54 | 0.80 | 0.98 | 826   | 0     | 0     |
| BRA | Brazil | 9458 | Tamarana               | 0.29 | 0.73 | 0.94 | 5901  | 786   | 0     |
| BRA | Brazil | 9459 | Tamboara               | 0.34 | 0.75 | 0.97 | 2337  | 230   | 0     |
| BRA | Brazil | 9460 | Tapejara               | 0.79 | 0.92 | 0.99 | 95    | 0     | 0     |
| BRA | Brazil | 9461 | Tapira                 | 0.17 | 0.49 | 0.65 | 3658  | 1787  | 873   |
| BRA | Brazil | 9462 | Teixeira Soares        | 0.49 | 0.76 | 0.93 | 3656  | 488   | 0     |
| BRA | Brazil | 9463 | Telemaco Borba         | 0.24 | 0.65 | 0.90 | 43442 | 11429 | 0     |
| BRA | Brazil | 9464 | Terra Boa              | 0.30 | 0.70 | 0.96 | 8513  | 1629  | 0     |
| BRA | Brazil | 9465 | Terra Rica             | 0.35 | 0.82 | 0.98 | 7398  | 0     | 0     |
| BRA | Brazil | 9466 | Terra Roxa             | 0.35 | 0.76 | 0.98 | 8033  | 708   | 0     |
| BRA | Brazil | 9467 | Tibagi                 | 0.08 | 0.40 | 0.55 | 15029 | 8292  | 5153  |
| BRA | Brazil | 9468 | Tijucas Do Sul         | 0.30 | 0.67 | 0.91 | 8084  | 2133  | 0     |
| BRA | Brazil | 9469 | Toledo                 | 0.17 | 0.49 | 0.65 | 85497 | 41777 | 20397 |
| BRA | Brazil | 9470 | Tomazina               | 0.34 | 0.73 | 0.97 | 4023  | 616   | 0     |
| BRA | Brazil | 9471 | Tres Barras Do Parana  | 0.17 | 0.49 | 0.65 | 7705  | 3765  | 1838  |
| BRA | Brazil | 9472 | Tunas Do Parana        | 0.30 | 0.72 | 0.97 | 4220  | 648   | 0     |
| BRA | Brazil | 9473 | Tuneiras Do Oeste      | 0.29 | 0.68 | 0.92 | 4460  | 1093  | 0     |
| BRA | Brazil | 9474 | Tupassi                | 0.32 | 0.76 | 0.98 | 3879  | 289   | 0     |
| BRA | Brazil | 9475 | Turvo                  | 0.50 | 0.89 | 1.00 | 3943  | 0     | 0     |
| BRA | Brazil | 9476 | Ubirata                | 0.43 | 0.81 | 0.98 | 8055  | 0     | 0     |
| BRA | Brazil | 9477 | Umuarama               | 0.34 | 0.72 | 0.95 | 50632 | 8442  | 0     |
| BRA | Brazil | 9478 | Uniao Da Vitoria       | 0.76 | 0.89 | 0.98 | 2513  | 0     | 0     |
| BRA | Brazil | 9479 | Uniflor                | 0.38 | 0.80 | 0.98 | 1077  | 0     | 0     |
| BRA | Brazil | 9480 | Urai                   | 0.46 | 0.77 | 0.94 | 3918  | 349   | 0     |
| BRA | Brazil | 9481 | Ventania               | 0.23 | 0.61 | 0.81 | 6494  | 2215  | 0     |
| BRA | Brazil | 9482 | Vera Cruz Do Oeste     | 0.45 | 0.83 | 0.98 | 3052  | 0     | 0     |

|     |        |      |                        |      |      |      |       |       |       |
|-----|--------|------|------------------------|------|------|------|-------|-------|-------|
| BRA | Brazil | 9483 | Vere                   | 0.33 | 0.75 | 0.96 | 3751  | 403   | 0     |
| BRA | Brazil | 9484 | Vila Alta              | 0.17 | 0.49 | 0.65 | 1953  | 954   | 466   |
| BRA | Brazil | 9485 | Virmond                | 0.44 | 0.86 | 0.99 | 1481  | 0     | 0     |
| BRA | Brazil | 9486 | Vitorino               | 0.49 | 0.74 | 0.93 | 2284  | 453   | 0     |
| BRA | Brazil | 9487 | Wenceslau Braz         | 0.08 | 0.40 | 0.55 | 14237 | 7855  | 4881  |
| BRA | Brazil | 9488 | Xambre                 | 0.33 | 0.72 | 0.97 | 2763  | 462   | 0     |
| BRA | Brazil | 9489 | Abreu E Lima           | 0.08 | 0.40 | 0.55 | 71506 | 39452 | 24517 |
| BRA | Brazil | 9490 | Afogados Da Ingazeira  | 0.08 | 0.40 | 0.55 | 27195 | 15004 | 9324  |
| BRA | Brazil | 9491 | Afranio                | 0.08 | 0.40 | 0.55 | 13992 | 7720  | 4797  |
| BRA | Brazil | 9492 | Agrestina              | 0.08 | 0.40 | 0.55 | 17905 | 9879  | 6139  |
| BRA | Brazil | 9493 | Agua Preta             | 0.08 | 0.40 | 0.55 | 26558 | 14653 | 9106  |
| BRA | Brazil | 9494 | Aguas Belas            | 0.08 | 0.40 | 0.55 | 31290 | 17264 | 10728 |
| BRA | Brazil | 9495 | Alagoinha              | 0.08 | 0.40 | 0.55 | 9089  | 5015  | 3116  |
| BRA | Brazil | 9496 | Alianca                | 0.08 | 0.40 | 0.55 | 27276 | 15049 | 9352  |
| BRA | Brazil | 9497 | Altinho                | 0.08 | 0.40 | 0.55 | 16893 | 9320  | 5792  |
| BRA | Brazil | 9498 | Amaraji                | 0.08 | 0.40 | 0.55 | 17029 | 9395  | 5839  |
| BRA | Brazil | 9499 | Angelim                | 0.08 | 0.40 | 0.55 | 8364  | 4615  | 2868  |
| BRA | Brazil | 9500 | Aracoiaba              | 0.08 | 0.40 | 0.55 | 14853 | 8195  | 5093  |
| BRA | Brazil | 9501 | Araripina              | 0.08 | 0.40 | 0.55 | 59669 | 32921 | 20459 |
| BRA | Brazil | 9502 | Arcoverde              | 0.08 | 0.40 | 0.55 | 54388 | 30007 | 18648 |
| BRA | Brazil | 9503 | Barra De Guabiraba     | 0.08 | 0.40 | 0.55 | 10350 | 5710  | 3549  |
| BRA | Brazil | 9504 | Barreiros              | 0.08 | 0.40 | 0.55 | 31058 | 17135 | 10649 |
| BRA | Brazil | 9505 | Belem De Maria         | 0.08 | 0.40 | 0.55 | 5277  | 2912  | 1809  |
| BRA | Brazil | 9506 | Belem De Sao Francisco | 0.08 | 0.40 | 0.55 | 15638 | 8628  | 5362  |
| BRA | Brazil | 9507 | Belo Jardim            | 0.08 | 0.40 | 0.55 | 55530 | 30637 | 19039 |
| BRA | Brazil | 9508 | Betania                | 0.08 | 0.40 | 0.55 | 9457  | 5218  | 3242  |
| BRA | Brazil | 9509 | Bezerras               | 0.08 | 0.40 | 0.55 | 45415 | 25056 | 15571 |
| BRA | Brazil | 9510 | Bodoco                 | 0.08 | 0.40 | 0.55 | 26443 | 14589 | 9066  |
| BRA | Brazil | 9511 | Bom Conselho           | 0.08 | 0.40 | 0.55 | 35361 | 19509 | 12124 |
| BRA | Brazil | 9512 | Bom Jardim             | 0.08 | 0.40 | 0.55 | 26361 | 14544 | 9038  |
| BRA | Brazil | 9513 | Bonito                 | 0.08 | 0.40 | 0.55 | 32102 | 17711 | 11007 |
| BRA | Brazil | 9514 | Brejao                 | 0.08 | 0.40 | 0.55 | 6550  | 3614  | 2246  |
| BRA | Brazil | 9515 | Brejinho               | 0.08 | 0.40 | 0.55 | 3897  | 2150  | 1336  |

|     |        |      |                         |      |      |      |        |        |       |
|-----|--------|------|-------------------------|------|------|------|--------|--------|-------|
| BRA | Brazil | 9516 | Brejo Da Madre De Deus  | 0.08 | 0.40 | 0.55 | 40410  | 22295  | 13855 |
| BRA | Brazil | 9517 | Buenos Aires            | 0.08 | 0.40 | 0.55 | 9279   | 5119   | 3181  |
| BRA | Brazil | 9518 | Buique                  | 0.08 | 0.40 | 0.55 | 41892  | 23113  | 14363 |
| BRA | Brazil | 9519 | Cabo De Santo Agostinho | 0.08 | 0.40 | 0.55 | 141752 | 78208  | 48602 |
| BRA | Brazil | 9520 | Cabrobo                 | 0.08 | 0.40 | 0.55 | 25272  | 13943  | 8665  |
| BRA | Brazil | 9521 | Cachoeirinha            | 1.00 | 1.00 | 1.00 | 0      | 0      | 0     |
| BRA | Brazil | 9522 | Caetes                  | 0.08 | 0.40 | 0.55 | 17045  | 9404   | 5844  |
| BRA | Brazil | 9523 | Calcado                 | 0.08 | 0.40 | 0.55 | 4941   | 2726   | 1694  |
| BRA | Brazil | 9524 | Calumbi                 | 0.08 | 0.40 | 0.55 | 4397   | 2426   | 1507  |
| BRA | Brazil | 9525 | Camaragibe              | 0.08 | 0.40 | 0.55 | 93556  | 51617  | 32077 |
| BRA | Brazil | 9526 | Camocim De Sao Felix    | 0.08 | 0.40 | 0.55 | 12788  | 7056   | 4385  |
| BRA | Brazil | 9527 | Camutanga               | 0.08 | 0.40 | 0.55 | 4778   | 2636   | 1638  |
| BRA | Brazil | 9528 | Canhotinho              | 0.08 | 0.40 | 0.55 | 18773  | 10358  | 6437  |
| BRA | Brazil | 9529 | Capoeiras               | 0.08 | 0.40 | 0.55 | 16734  | 9232   | 5737  |
| BRA | Brazil | 9530 | Carnaiba                | 0.08 | 0.40 | 0.55 | 14641  | 8078   | 5020  |
| BRA | Brazil | 9531 | Carnaubeira Da Penha    | 0.08 | 0.40 | 0.55 | 9331   | 5148   | 3199  |
| BRA | Brazil | 9532 | Carpina                 | 0.08 | 0.40 | 0.55 | 60968  | 33637  | 20904 |
| BRA | Brazil | 9533 | Caruaru                 | 0.08 | 0.40 | 0.55 | 266723 | 147158 | 91451 |
| BRA | Brazil | 9534 | Casinhas                | 0.08 | 0.40 | 0.55 | 9347   | 5157   | 3205  |
| BRA | Brazil | 9535 | Catende                 | 0.08 | 0.40 | 0.55 | 28927  | 15960  | 9918  |
| BRA | Brazil | 9536 | Cedro                   | 0.08 | 0.40 | 0.55 | 8657   | 4776   | 2968  |
| BRA | Brazil | 9537 | Cha De Alegria          | 0.08 | 0.40 | 0.55 | 9659   | 5329   | 3312  |
| BRA | Brazil | 9538 | Cha Grande              | 0.08 | 0.40 | 0.55 | 15057  | 8308   | 5163  |
| BRA | Brazil | 9539 | Condado                 | 0.08 | 0.40 | 0.55 | 19429  | 10720  | 6662  |
| BRA | Brazil | 9540 | Correntes               | 0.08 | 0.40 | 0.55 | 13448  | 7419   | 4611  |
| BRA | Brazil | 9541 | Cortes                  | 0.08 | 0.40 | 0.55 | 4641   | 2561   | 1591  |
| BRA | Brazil | 9542 | Cumaru                  | 0.08 | 0.40 | 0.55 | 9613   | 5304   | 3296  |
| BRA | Brazil | 9543 | Cupira                  | 0.08 | 0.40 | 0.55 | 18139  | 10008  | 6219  |
| BRA | Brazil | 9544 | Custodia                | 0.08 | 0.40 | 0.55 | 27102  | 14953  | 9293  |
| BRA | Brazil | 9545 | Dormentes               | 0.08 | 0.40 | 0.55 | 12993  | 7169   | 4455  |
| BRA | Brazil | 9546 | Escada                  | 0.08 | 0.40 | 0.55 | 51707  | 28528  | 17729 |
| BRA | Brazil | 9547 | Exu                     | 0.08 | 0.40 | 0.55 | 23807  | 13135  | 8163  |
| BRA | Brazil | 9548 | Feira Nova              | 0.08 | 0.40 | 0.55 | 16521  | 9115   | 5664  |

|     |        |      |                         |      |      |      |        |        |        |
|-----|--------|------|-------------------------|------|------|------|--------|--------|--------|
| BRA | Brazil | 9550 | Ferreiros               | 0.08 | 0.40 | 0.55 | 9534   | 5260   | 3269   |
| BRA | Brazil | 9551 | Flores                  | 0.08 | 0.40 | 0.55 | 16465  | 9084   | 5645   |
| BRA | Brazil | 9552 | Floresta                | 0.08 | 0.40 | 0.55 | 23843  | 13155  | 8175   |
| BRA | Brazil | 9553 | Frei Miguelinho         | 0.08 | 0.40 | 0.55 | 11681  | 6445   | 4005   |
| BRA | Brazil | 9554 | Gameleira               | 0.08 | 0.40 | 0.55 | 22422  | 12371  | 7688   |
| BRA | Brazil | 9555 | Garanhuns               | 0.08 | 0.40 | 0.55 | 100310 | 55344  | 34393  |
| BRA | Brazil | 9556 | Gloria Do Goita         | 0.08 | 0.40 | 0.55 | 20306  | 11203  | 6962   |
| BRA | Brazil | 9557 | Goiana                  | 0.08 | 0.40 | 0.55 | 57489  | 31718  | 19711  |
| BRA | Brazil | 9558 | Granito                 | 0.08 | 0.40 | 0.55 | 5095   | 2811   | 1747   |
| BRA | Brazil | 9559 | Gravata                 | 0.08 | 0.40 | 0.55 | 60800  | 33545  | 20846  |
| BRA | Brazil | 9560 | Iati                    | 0.08 | 0.40 | 0.55 | 13074  | 7213   | 4483   |
| BRA | Brazil | 9561 | Ibimirim                | 0.08 | 0.40 | 0.55 | 21460  | 11840  | 7358   |
| BRA | Brazil | 9562 | Ibirajuba               | 0.08 | 0.40 | 0.55 | 6001   | 3311   | 2057   |
| BRA | Brazil | 9563 | Igarassu                | 0.08 | 0.40 | 0.55 | 85549  | 47200  | 29332  |
| BRA | Brazil | 9564 | Iguaraci                | 0.08 | 0.40 | 0.55 | 8672   | 4785   | 2973   |
| BRA | Brazil | 9565 | Inaja                   | 0.08 | 0.40 | 0.55 | 14489  | 7994   | 4968   |
| BRA | Brazil | 9566 | Ingazeira               | 0.08 | 0.40 | 0.55 | 3129   | 1727   | 1073   |
| BRA | Brazil | 9567 | Ipojuca                 | 0.08 | 0.40 | 0.55 | 68330  | 37699  | 23428  |
| BRA | Brazil | 9568 | Ipubi                   | 0.08 | 0.40 | 0.55 | 25269  | 13942  | 8664   |
| BRA | Brazil | 9569 | Itacuruba               | 0.08 | 0.40 | 0.55 | 3561   | 1965   | 1221   |
| BRA | Brazil | 9570 | Itaiba                  | 0.08 | 0.40 | 0.55 | 18750  | 10345  | 6429   |
| BRA | Brazil | 9571 | Itamaraca               | 0.08 | 0.40 | 0.55 | 18890  | 10422  | 6477   |
| BRA | Brazil | 9572 | Itambe                  | 0.08 | 0.40 | 0.55 | 26073  | 14385  | 8940   |
| BRA | Brazil | 9573 | Itapetim                | 0.08 | 0.40 | 0.55 | 10670  | 5887   | 3658   |
| BRA | Brazil | 9574 | Itapissuma              | 0.08 | 0.40 | 0.55 | 18733  | 10335  | 6423   |
| BRA | Brazil | 9575 | Itaquitinga             | 0.08 | 0.40 | 0.55 | 10900  | 6014   | 3737   |
| BRA | Brazil | 9576 | Jaboatao Dos Guararapes | 0.08 | 0.40 | 0.55 | 499648 | 275668 | 171313 |
| BRA | Brazil | 9577 | Jaqueira                | 0.08 | 0.40 | 0.55 | 12433  | 6860   | 4263   |
| BRA | Brazil | 9578 | Jatauba                 | 0.08 | 0.40 | 0.55 | 12618  | 6962   | 4326   |
| BRA | Brazil | 9579 | Jatoba                  | 0.08 | 0.40 | 0.55 | 10871  | 5998   | 3727   |
| BRA | Brazil | 9580 | Joao Alfredo            | 0.08 | 0.40 | 0.55 | 25068  | 13831  | 8595   |
| BRA | Brazil | 9581 | Joaquim Nabuco          | 0.08 | 0.40 | 0.55 | 11605  | 6403   | 3979   |
| BRA | Brazil | 9582 | Jucati                  | 0.08 | 0.40 | 0.55 | 8078   | 4457   | 2770   |

|     |        |      |                  |      |      |      |        |        |       |
|-----|--------|------|------------------|------|------|------|--------|--------|-------|
| BRA | Brazil | 9583 | Jupi             | 0.08 | 0.40 | 0.55 | 12689  | 7001   | 4350  |
| BRA | Brazil | 9584 | Jurema           | 0.08 | 0.40 | 0.55 | 11191  | 6175   | 3837  |
| BRA | Brazil | 9585 | Lagoa Do Carro   | 0.08 | 0.40 | 0.55 | 12392  | 6837   | 4249  |
| BRA | Brazil | 9586 | Lagoa Do Itaenga | 0.08 | 0.40 | 0.55 | 17160  | 9468   | 5884  |
| BRA | Brazil | 9587 | Lagoa Do Ouro    | 0.08 | 0.40 | 0.55 | 9778   | 5395   | 3353  |
| BRA | Brazil | 9588 | Lagoa Dos Gatos  | 0.08 | 0.40 | 0.55 | 13871  | 7653   | 4756  |
| BRA | Brazil | 9589 | Lagoa Grande     | 0.08 | 0.40 | 0.55 | 17621  | 9722   | 6042  |
| BRA | Brazil | 9590 | Lajedo           | 0.08 | 0.40 | 0.55 | 30190  | 16656  | 10351 |
| BRA | Brazil | 9591 | Limoeiro         | 0.08 | 0.40 | 0.55 | 42807  | 23618  | 14677 |
| BRA | Brazil | 9592 | Macaparana       | 0.08 | 0.40 | 0.55 | 17161  | 9468   | 5884  |
| BRA | Brazil | 9593 | Machados         | 0.08 | 0.40 | 0.55 | 7450   | 4110   | 2554  |
| BRA | Brazil | 9594 | Manari           | 0.08 | 0.40 | 0.55 | 18091  | 9981   | 6203  |
| BRA | Brazil | 9595 | Maraial          | 0.08 | 0.40 | 0.55 | 5300   | 2924   | 1817  |
| BRA | Brazil | 9596 | Mirandiba        | 0.08 | 0.40 | 0.55 | 10845  | 5983   | 3718  |
| BRA | Brazil | 9597 | Moreilandia      | 0.08 | 0.40 | 0.55 | 10085  | 5564   | 3458  |
| BRA | Brazil | 9598 | Moreno           | 0.08 | 0.40 | 0.55 | 45033  | 24846  | 15440 |
| BRA | Brazil | 9599 | Nazare Da Mata   | 0.08 | 0.40 | 0.55 | 23921  | 13198  | 8202  |
| BRA | Brazil | 9600 | Olinda           | 0.08 | 0.40 | 0.55 | 247082 | 136321 | 84716 |
| BRA | Brazil | 9601 | Orobo            | 0.08 | 0.40 | 0.55 | 15873  | 8757   | 5442  |
| BRA | Brazil | 9602 | Oroco            | 0.08 | 0.40 | 0.55 | 10900  | 6014   | 3737  |
| BRA | Brazil | 9603 | Ouricuri         | 0.08 | 0.40 | 0.55 | 50185  | 27688  | 17207 |
| BRA | Brazil | 9604 | Palmares         | 0.08 | 0.40 | 0.55 | 47004  | 25934  | 16116 |
| BRA | Brazil | 9605 | Palmeirina       | 0.08 | 0.40 | 0.55 | 6043   | 3334   | 2072  |
| BRA | Brazil | 9606 | Panelas          | 0.08 | 0.40 | 0.55 | 18977  | 10470  | 6506  |
| BRA | Brazil | 9607 | Paranatama       | 0.08 | 0.40 | 0.55 | 11324  | 6248   | 3883  |
| BRA | Brazil | 9608 | Parnamirim       | 0.08 | 0.40 | 0.55 | 15466  | 8533   | 5303  |
| BRA | Brazil | 9609 | Passira          | 0.08 | 0.40 | 0.55 | 23148  | 12771  | 7937  |
| BRA | Brazil | 9610 | Paudalho         | 0.08 | 0.40 | 0.55 | 41376  | 22828  | 14186 |
| BRA | Brazil | 9611 | Paulista         | 0.08 | 0.40 | 0.55 | 273507 | 150901 | 93777 |
| BRA | Brazil | 9612 | Pedra            | 0.08 | 0.40 | 0.55 | 16498  | 9102   | 5656  |
| BRA | Brazil | 9613 | Pesqueira        | 0.08 | 0.40 | 0.55 | 50705  | 27975  | 17385 |
| BRA | Brazil | 9614 | Petrolandia      | 0.08 | 0.40 | 0.55 | 25996  | 14343  | 8913  |
| BRA | Brazil | 9615 | Petrolina        | 0.08 | 0.40 | 0.55 | 256754 | 141657 | 88032 |

|     |        |      |                           |      |      |      |         |        |        |
|-----|--------|------|---------------------------|------|------|------|---------|--------|--------|
| BRA | Brazil | 9616 | Pocao                     | 0.08 | 0.40 | 0.55 | 7900    | 4359   | 2709   |
| BRA | Brazil | 9617 | Pombos                    | 0.08 | 0.40 | 0.55 | 23164   | 12780  | 7942   |
| BRA | Brazil | 9618 | Primavera                 | 0.08 | 0.40 | 0.55 | 8267    | 4561   | 2835   |
| BRA | Brazil | 9619 | Quipapa                   | 0.08 | 0.40 | 0.55 | 18265   | 10077  | 6262   |
| BRA | Brazil | 9620 | Quixaba                   | 0.08 | 0.40 | 0.55 | 5217    | 2878   | 1789   |
| BRA | Brazil | 9621 | Recife                    | 0.08 | 0.40 | 0.55 | 1203183 | 663826 | 412532 |
| BRA | Brazil | 9622 | Riacho Das Almas          | 0.08 | 0.40 | 0.55 | 14340   | 7912   | 4917   |
| BRA | Brazil | 9623 | Ribeirao                  | 0.08 | 0.40 | 0.55 | 34791   | 19195  | 11929  |
| BRA | Brazil | 9624 | Rio Formoso               | 0.08 | 0.40 | 0.55 | 19292   | 10644  | 6614   |
| BRA | Brazil | 9625 | Saire                     | 0.08 | 0.40 | 0.55 | 8558    | 4722   | 2934   |
| BRA | Brazil | 9626 | Salgadinho                | 0.08 | 0.40 | 0.55 | 6121    | 3377   | 2099   |
| BRA | Brazil | 9627 | Salgueiro                 | 0.08 | 0.40 | 0.55 | 44391   | 24492  | 15220  |
| BRA | Brazil | 9628 | Saloa                     | 0.08 | 0.40 | 0.55 | 12190   | 6726   | 4180   |
| BRA | Brazil | 9629 | Sanharo                   | 0.08 | 0.40 | 0.55 | 18394   | 10149  | 6307   |
| BRA | Brazil | 9630 | Santa Cruz                | 0.08 | 0.40 | 0.55 | 12197   | 6729   | 4182   |
| BRA | Brazil | 9631 | Santa Cruz Da Baixa Verde | 0.08 | 0.40 | 0.55 | 8296    | 4577   | 2844   |
| BRA | Brazil | 9632 | Santa Cruz Do Capibaribe  | 0.08 | 0.40 | 0.55 | 76625   | 42276  | 26272  |
| BRA | Brazil | 9633 | Santa Filomena            | 0.16 | 0.51 | 0.69 | 8477    | 3798   | 1463   |
| BRA | Brazil | 9634 | Santa Maria Da Boa Vista  | 0.08 | 0.40 | 0.55 | 30971   | 17088  | 10619  |
| BRA | Brazil | 9635 | Santa Maria Do Cambuca    | 0.08 | 0.40 | 0.55 | 9998    | 5516   | 3428   |
| BRA | Brazil | 9636 | Santa Terezinha           | 0.08 | 0.40 | 0.55 | 9320    | 5142   | 3196   |
| BRA | Brazil | 9637 | Sao Benedito Do Sul       | 0.08 | 0.40 | 0.55 | 12607   | 6955   | 4322   |
| BRA | Brazil | 9638 | Sao Bento Do Una          | 0.08 | 0.40 | 0.55 | 43170   | 23818  | 14802  |
| BRA | Brazil | 9639 | Sao Caitano               | 0.08 | 0.40 | 0.55 | 27262   | 15041  | 9347   |
| BRA | Brazil | 9640 | Sao Joao                  | 0.08 | 0.40 | 0.55 | 15934   | 8791   | 5463   |
| BRA | Brazil | 9641 | Sao Joaquim Do Monte      | 0.08 | 0.40 | 0.55 | 16123   | 8896   | 5528   |
| BRA | Brazil | 9642 | Sao Jose Da Coroa Grande  | 0.08 | 0.40 | 0.55 | 14876   | 8208   | 5101   |
| BRA | Brazil | 9643 | Sao Jose Do Belmonte      | 0.08 | 0.40 | 0.55 | 24794   | 13679  | 8501   |
| BRA | Brazil | 9644 | Sao Jose Do Egito         | 0.08 | 0.40 | 0.55 | 25719   | 14190  | 8818   |
| BRA | Brazil | 9645 | Sao Lourenco Da Mata      | 0.08 | 0.40 | 0.55 | 99409   | 54846  | 34084  |
| BRA | Brazil | 9646 | Sao Vicente Ferrer        | 0.08 | 0.40 | 0.55 | 17265   | 9526   | 5920   |
| BRA | Brazil | 9647 | Serra Talhada             | 0.08 | 0.40 | 0.55 | 63176   | 34856  | 21661  |
| BRA | Brazil | 9648 | Serrita                   | 0.08 | 0.40 | 0.55 | 15717   | 8671   | 5389   |



|     |        |      |                        |      |      |      |       |       |       |
|-----|--------|------|------------------------|------|------|------|-------|-------|-------|
| BRA | Brazil | 9649 | Sertania               | 0.08 | 0.40 | 0.55 | 25515 | 14077 | 8748  |
| BRA | Brazil | 9650 | Sirinhaem              | 0.08 | 0.40 | 0.55 | 33718 | 18603 | 11561 |
| BRA | Brazil | 9651 | Solidao                | 0.08 | 0.40 | 0.55 | 3973  | 2192  | 1362  |
| BRA | Brazil | 9652 | Surubim                | 0.08 | 0.40 | 0.55 | 47631 | 26279 | 16331 |
| BRA | Brazil | 9653 | Tabira                 | 0.08 | 0.40 | 0.55 | 20936 | 11551 | 7178  |
| BRA | Brazil | 9654 | Tacaimbo               | 0.08 | 0.40 | 0.55 | 8958  | 4943  | 3072  |
| BRA | Brazil | 9655 | Tacaratu               | 0.08 | 0.40 | 0.55 | 19085 | 10529 | 6543  |
| BRA | Brazil | 9656 | Tamandare              | 0.08 | 0.40 | 0.55 | 13320 | 7349  | 4567  |
| BRA | Brazil | 9657 | Taquaritinga Do Norte  | 0.08 | 0.40 | 0.55 | 20551 | 11339 | 7046  |
| BRA | Brazil | 9658 | Terezinha              | 0.08 | 0.40 | 0.55 | 4987  | 2751  | 1710  |
| BRA | Brazil | 9659 | Terra Nova             | 0.08 | 0.40 | 0.55 | 7066  | 3899  | 2423  |
| BRA | Brazil | 9660 | Timbauba               | 0.08 | 0.40 | 0.55 | 40671 | 22439 | 13945 |
| BRA | Brazil | 9661 | Toritama               | 0.08 | 0.40 | 0.55 | 29702 | 16387 | 10184 |
| BRA | Brazil | 9662 | Tracunhaem             | 0.08 | 0.40 | 0.55 | 10706 | 5907  | 3671  |
| BRA | Brazil | 9663 | Trindade               | 0.08 | 0.40 | 0.55 | 21268 | 11734 | 7292  |
| BRA | Brazil | 9664 | Triunfo                | 0.08 | 0.40 | 0.55 | 10612 | 5855  | 3638  |
| BRA | Brazil | 9665 | Tupanatinga            | 0.08 | 0.40 | 0.55 | 17770 | 9804  | 6093  |
| BRA | Brazil | 9666 | Tuparetama             | 0.08 | 0.40 | 0.55 | 5024  | 2772  | 1722  |
| BRA | Brazil | 9667 | Venturosa              | 0.08 | 0.40 | 0.55 | 13255 | 7313  | 4545  |
| BRA | Brazil | 9668 | Verdejante             | 0.08 | 0.40 | 0.55 | 6697  | 3695  | 2296  |
| BRA | Brazil | 9669 | Vertente Do Lerio      | 0.08 | 0.40 | 0.55 | 6275  | 3462  | 2152  |
| BRA | Brazil | 9670 | Vertentes              | 0.08 | 0.40 | 0.55 | 13698 | 7558  | 4697  |
| BRA | Brazil | 9671 | Vicencia               | 0.08 | 0.40 | 0.55 | 24245 | 13376 | 8313  |
| BRA | Brazil | 9672 | Vitoria De Santo Antao | 0.08 | 0.40 | 0.55 | 97094 | 53569 | 33290 |
| BRA | Brazil | 9673 | Xexeu                  | 0.08 | 0.40 | 0.55 | 10081 | 5562  | 3456  |
| BRA | Brazil | 9674 | Acaua                  | 0.08 | 0.40 | 0.55 | 4598  | 2537  | 1577  |
| BRA | Brazil | 9675 | Agricolandia           | 0.08 | 0.40 | 0.55 | 3827  | 2111  | 1312  |
| BRA | Brazil | 9676 | Agua Branca            | 0.08 | 0.40 | 0.55 | 12456 | 6872  | 4271  |
| BRA | Brazil | 9677 | Alagoinha Do Piaui     | 0.08 | 0.40 | 0.55 | 5256  | 2900  | 1802  |
| BRA | Brazil | 9678 | Alegrete Do Piaui      | 0.08 | 0.40 | 0.55 | 3511  | 1937  | 1204  |
| BRA | Brazil | 9679 | Alto Longa             | 0.08 | 0.40 | 0.55 | 10662 | 5882  | 3656  |
| BRA | Brazil | 9680 | Altos                  | 0.21 | 0.57 | 0.76 | 26698 | 10364 | 2029  |
| BRA | Brazil | 9681 | Alvorada Do Gurgueia   | 0.17 | 0.49 | 0.65 | 3547  | 1733  | 846   |

|     |        |      |                           |      |      |      |       |       |      |
|-----|--------|------|---------------------------|------|------|------|-------|-------|------|
| BRA | Brazil | 9682 | Amarante                  | 0.17 | 0.49 | 0.65 | 11490 | 5615  | 2741 |
| BRA | Brazil | 9683 | Angical Do Piaui          | 0.24 | 0.67 | 0.92 | 3822  | 897   | 0    |
| BRA | Brazil | 9684 | Anisio De Abreu           | 0.51 | 0.77 | 0.97 | 2850  | 303   | 0    |
| BRA | Brazil | 9685 | Antonio Almeida           | 0.17 | 0.49 | 0.65 | 2025  | 989   | 483  |
| BRA | Brazil | 9686 | Arozazes                  | 0.08 | 0.40 | 0.55 | 4250  | 2345  | 1457 |
| BRA | Brazil | 9687 | Arraial                   | 0.08 | 0.40 | 0.55 | 3314  | 1829  | 1136 |
| BRA | Brazil | 9688 | Assuncao Do Piaui         | 0.24 | 0.58 | 0.75 | 4398  | 1716  | 386  |
| BRA | Brazil | 9689 | Avelino Lopes             | 0.31 | 0.68 | 0.89 | 5761  | 1453  | 0    |
| BRA | Brazil | 9690 | Baixa Grande Do Ribeiro   | 0.17 | 0.49 | 0.65 | 7982  | 3900  | 1904 |
| BRA | Brazil | 9691 | Barra D'alcantara         | 0.08 | 0.40 | 0.55 | 3015  | 1664  | 1034 |
| BRA | Brazil | 9692 | Barras                    | 0.23 | 0.63 | 0.87 | 28262 | 8275  | 0    |
| BRA | Brazil | 9693 | Barreiras Do Piaui        | 0.17 | 0.49 | 0.65 | 2095  | 1024  | 500  |
| BRA | Brazil | 9694 | Barro Duro                | 0.08 | 0.40 | 0.55 | 4884  | 2695  | 1675 |
| BRA | Brazil | 9695 | Batalha                   | 0.08 | 0.40 | 0.55 | 19600 | 10814 | 6720 |
| BRA | Brazil | 9696 | Bela Vista Do Piaui       | 0.08 | 0.40 | 0.55 | 3061  | 1689  | 1050 |
| BRA | Brazil | 9697 | Belem Do Piaui            | 0.08 | 0.40 | 0.55 | 2669  | 1473  | 915  |
| BRA | Brazil | 9698 | Beneditinos               | 0.21 | 0.59 | 0.79 | 6089  | 2222  | 115  |
| BRA | Brazil | 9699 | Bertolinia                | 0.17 | 0.49 | 0.65 | 3508  | 1714  | 837  |
| BRA | Brazil | 9700 | Betania Do Piaui          | 0.08 | 0.40 | 0.55 | 6384  | 3522  | 2189 |
| BRA | Brazil | 9701 | Boa Hora                  | 0.08 | 0.40 | 0.55 | 5121  | 2825  | 1756 |
| BRA | Brazil | 9702 | Bocaina                   | 0.55 | 0.94 | 1.00 | 1141  | 0     | 0    |
| BRA | Brazil | 9703 | Bom Jesus                 | 0.17 | 0.49 | 0.65 | 17692 | 8645  | 4221 |
| BRA | Brazil | 9704 | Bom Principio Do Piaui    | 0.23 | 0.60 | 0.82 | 4896  | 1695  | 0    |
| BRA | Brazil | 9705 | Bonfim Do Piaui           | 0.17 | 0.49 | 0.65 | 4411  | 2156  | 1052 |
| BRA | Brazil | 9706 | Boqueirao Do Piaui        | 0.08 | 0.40 | 0.55 | 4929  | 2719  | 1690 |
| BRA | Brazil | 9707 | Brasileira                | 0.21 | 0.63 | 0.89 | 5581  | 1595  | 0    |
| BRA | Brazil | 9708 | Brejo Do Piaui            | 0.17 | 0.49 | 0.65 | 1708  | 835   | 407  |
| BRA | Brazil | 9709 | Buriti Dos Lopes          | 0.17 | 0.49 | 0.65 | 11632 | 5684  | 2775 |
| BRA | Brazil | 9710 | Buriti Dos Montes         | 0.08 | 0.40 | 0.55 | 5710  | 3150  | 1958 |
| BRA | Brazil | 9711 | Cabeceiras Do Piaui       | 0.08 | 0.40 | 0.55 | 8947  | 4936  | 3068 |
| BRA | Brazil | 9712 | Cajazeiras Do Piaui       | 0.08 | 0.40 | 0.55 | 2771  | 1529  | 950  |
| BRA | Brazil | 9713 | Cajueiro Da Praia         | 0.08 | 0.40 | 0.55 | 5496  | 3032  | 1884 |
| BRA | Brazil | 9714 | Caldeirao Grande Do Piaui | 0.08 | 0.40 | 0.55 | 3991  | 2202  | 1368 |

|     |        |      |                           |      |      |      |       |      |      |
|-----|--------|------|---------------------------|------|------|------|-------|------|------|
| BRA | Brazil | 9715 | Campinas Do Piaui         | 0.08 | 0.40 | 0.55 | 4254  | 2347 | 1459 |
| BRA | Brazil | 9716 | Campo Alegre Do Fidalgo   | 0.08 | 0.40 | 0.55 | 3974  | 2193 | 1363 |
| BRA | Brazil | 9717 | Campo Grande Do Piaui     | 0.08 | 0.40 | 0.55 | 4585  | 2530 | 1572 |
| BRA | Brazil | 9718 | Campo Largo Do Piaui      | 0.08 | 0.40 | 0.55 | 5056  | 2789 | 1733 |
| BRA | Brazil | 9719 | Campo Maior               | 0.22 | 0.64 | 0.91 | 27469 | 7406 | 0    |
| BRA | Brazil | 9720 | Canavieira                | 0.31 | 0.68 | 0.89 | 1929  | 485  | 0    |
| BRA | Brazil | 9721 | Canto Do Buriti           | 0.17 | 0.49 | 0.65 | 13801 | 6744 | 3293 |
| BRA | Brazil | 9722 | Capitao De Campos         | 0.08 | 0.40 | 0.55 | 8378  | 4623 | 2873 |
| BRA | Brazil | 9723 | Capitao Gervasio Oliveira | 0.18 | 0.55 | 0.76 | 3266  | 1303 | 226  |
| BRA | Brazil | 9724 | Caracol                   | 0.17 | 0.49 | 0.65 | 6712  | 3280 | 1601 |
| BRA | Brazil | 9725 | Caraubas Do Piaui         | 0.08 | 0.40 | 0.55 | 4344  | 2397 | 1490 |
| BRA | Brazil | 9726 | Caridade Do Piaui         | 0.08 | 0.40 | 0.55 | 3459  | 1908 | 1186 |
| BRA | Brazil | 9727 | Castelo Do Piaui          | 0.08 | 0.40 | 0.55 | 14013 | 7731 | 4804 |
| BRA | Brazil | 9728 | Caxingo                   | 0.08 | 0.40 | 0.55 | 4164  | 2298 | 1428 |
| BRA | Brazil | 9729 | Cocal                     | 0.08 | 0.40 | 0.55 | 16972 | 9364 | 5819 |
| BRA | Brazil | 9730 | Cocal De Telha            | 0.08 | 0.40 | 0.55 | 3724  | 2054 | 1277 |
| BRA | Brazil | 9731 | Cocal Dos Alves           | 0.08 | 0.40 | 0.55 | 4268  | 2355 | 1463 |
| BRA | Brazil | 9732 | Coivaras                  | 0.20 | 0.53 | 0.68 | 2971  | 1347 | 575  |
| BRA | Brazil | 9733 | Colonia Do Gurgueia       | 0.17 | 0.49 | 0.65 | 4297  | 2100 | 1025 |
| BRA | Brazil | 9734 | Colonia Do Piaui          | 0.08 | 0.40 | 0.55 | 5588  | 3083 | 1916 |
| BRA | Brazil | 9735 | Conceicao Do Caninde      | 0.25 | 0.59 | 0.78 | 2563  | 961  | 105  |
| BRA | Brazil | 9736 | Coronel Jose Dias         | 0.64 | 0.78 | 0.88 | 677   | 78   | 0    |
| BRA | Brazil | 9737 | Corrente                  | 0.31 | 0.70 | 0.93 | 13301 | 2836 | 0    |
| BRA | Brazil | 9738 | Cristalandia Do Piaui     | 0.39 | 0.71 | 0.96 | 3690  | 792  | 0    |
| BRA | Brazil | 9739 | Cristino Castro           | 0.30 | 0.65 | 0.84 | 5459  | 1646 | 0    |
| BRA | Brazil | 9740 | Curimata                  | 0.32 | 0.67 | 0.87 | 5738  | 1521 | 0    |
| BRA | Brazil | 9741 | Currais                   | 0.17 | 0.49 | 0.65 | 3163  | 1546 | 755  |
| BRA | Brazil | 9742 | Curral Novo Do Piaui      | 0.08 | 0.40 | 0.55 | 4161  | 2296 | 1427 |
| BRA | Brazil | 9743 | Curralinhos               | 0.08 | 0.40 | 0.55 | 3443  | 1899 | 1180 |
| BRA | Brazil | 9744 | Demerval Lobao            | 0.24 | 0.62 | 0.84 | 8173  | 2558 | 0    |
| BRA | Brazil | 9745 | Dirceu Arcoverde          | 0.17 | 0.49 | 0.65 | 4606  | 2251 | 1099 |
| BRA | Brazil | 9746 | Dom Expedito Lopes        | 0.08 | 0.40 | 0.55 | 4924  | 2717 | 1688 |
| BRA | Brazil | 9747 | Dom Inocencio             | 0.08 | 0.40 | 0.55 | 6128  | 3381 | 2101 |

|     |        |      |                   |      |      |      |       |       |       |
|-----|--------|------|-------------------|------|------|------|-------|-------|-------|
| BRA | Brazil | 9748 | Domingos Mourao   | 0.23 | 0.59 | 0.78 | 2764  | 1028  | 115   |
| BRA | Brazil | 9749 | Elesbao Veloso    | 0.21 | 0.57 | 0.75 | 8389  | 3315  | 675   |
| BRA | Brazil | 9750 | Eliseu Martins    | 0.17 | 0.49 | 0.65 | 3166  | 1547  | 755   |
| BRA | Brazil | 9751 | Esperantina       | 0.24 | 0.66 | 0.91 | 22749 | 5478  | 0     |
| BRA | Brazil | 9752 | Fartura Do Piaui  | 0.17 | 0.49 | 0.65 | 3526  | 1723  | 841   |
| BRA | Brazil | 9753 | Flores Do Piaui   | 0.17 | 0.49 | 0.65 | 2947  | 1440  | 703   |
| BRA | Brazil | 9754 | Floresta Do Piaui | 0.08 | 0.40 | 0.55 | 1672  | 922   | 573   |
| BRA | Brazil | 9755 | Floriano          | 0.17 | 0.49 | 0.65 | 37787 | 18464 | 9015  |
| BRA | Brazil | 9756 | Francinopolis     | 0.08 | 0.40 | 0.55 | 3843  | 2120  | 1318  |
| BRA | Brazil | 9757 | Francisco Ayres   | 0.08 | 0.40 | 0.55 | 3050  | 1683  | 1046  |
| BRA | Brazil | 9758 | Francisco Macedo  | 0.08 | 0.40 | 0.55 | 2209  | 1219  | 757   |
| BRA | Brazil | 9759 | Francisco Santos  | 0.08 | 0.40 | 0.55 | 7533  | 4156  | 2583  |
| BRA | Brazil | 9760 | Fronteiras        | 0.08 | 0.40 | 0.55 | 9102  | 5022  | 3121  |
| BRA | Brazil | 9761 | Geminiano         | 0.17 | 0.62 | 0.86 | 4459  | 1265  | 0     |
| BRA | Brazil | 9762 | Gilbues           | 0.32 | 0.76 | 1.00 | 5280  | 489   | 0     |
| BRA | Brazil | 9763 | Guadalupe         | 0.31 | 0.70 | 0.94 | 5130  | 1070  | 0     |
| BRA | Brazil | 9764 | Guaribas          | 0.17 | 0.49 | 0.65 | 3446  | 1684  | 822   |
| BRA | Brazil | 9765 | Hugo Napoleao     | 0.08 | 0.40 | 0.55 | 3040  | 1677  | 1042  |
| BRA | Brazil | 9766 | Ilha Grande       | 0.17 | 0.49 | 0.65 | 6191  | 3025  | 1477  |
| BRA | Brazil | 9767 | Inhuma            | 0.08 | 0.40 | 0.55 | 11289 | 6229  | 3871  |
| BRA | Brazil | 9768 | Ipiranga Do Piaui | 0.08 | 0.40 | 0.55 | 7061  | 3896  | 2421  |
| BRA | Brazil | 9769 | Isaias Coelho     | 0.08 | 0.40 | 0.55 | 6027  | 3325  | 2066  |
| BRA | Brazil | 9770 | Itainopolis       | 0.19 | 0.55 | 0.74 | 6624  | 2696  | 614   |
| BRA | Brazil | 9771 | Itaueira          | 0.17 | 0.49 | 0.65 | 7102  | 3470  | 1694  |
| BRA | Brazil | 9772 | Jacobina Do Piaui | 0.08 | 0.40 | 0.55 | 4776  | 2635  | 1637  |
| BRA | Brazil | 9773 | Jaicos            | 0.08 | 0.40 | 0.55 | 14450 | 7972  | 4954  |
| BRA | Brazil | 9774 | Jardim Do Mulato  | 0.08 | 0.40 | 0.55 | 3147  | 1736  | 1079  |
| BRA | Brazil | 9775 | Jatoba Do Piaui   | 0.24 | 0.66 | 0.92 | 2789  | 709   | 0     |
| BRA | Brazil | 9776 | Jerumenha         | 0.32 | 0.66 | 0.88 | 2019  | 574   | 0     |
| BRA | Brazil | 9777 | Joao Costa        | 0.08 | 0.40 | 0.55 | 2248  | 1240  | 771   |
| BRA | Brazil | 9778 | Joaquim Pires     | 0.17 | 0.49 | 0.65 | 9441  | 4613  | 2252  |
| BRA | Brazil | 9779 | Joca Marques      | 0.17 | 0.49 | 0.65 | 3324  | 1624  | 793   |
| BRA | Brazil | 9780 | Jose De Freitas   | 0.08 | 0.40 | 0.55 | 30256 | 16693 | 10374 |

|     |        |      |                            |      |      |      |       |       |      |
|-----|--------|------|----------------------------|------|------|------|-------|-------|------|
| BRA | Brazil | 9781 | Juazeiro Do Piaui          | 0.23 | 0.58 | 0.75 | 2753  | 1067  | 248  |
| BRA | Brazil | 9782 | Julio Borges               | 0.30 | 0.67 | 0.89 | 2949  | 767   | 0    |
| BRA | Brazil | 9783 | Jurema                     | 0.17 | 0.49 | 0.65 | 2860  | 1398  | 682  |
| BRA | Brazil | 9784 | Lagoa Alegre               | 0.08 | 0.40 | 0.55 | 4907  | 2707  | 1682 |
| BRA | Brazil | 9785 | Lagoa De Sao Francisco     | 0.08 | 0.40 | 0.55 | 5005  | 2761  | 1716 |
| BRA | Brazil | 9786 | Lagoa Do Barro Do Piaui    | 0.08 | 0.40 | 0.55 | 3659  | 2019  | 1255 |
| BRA | Brazil | 9787 | Lagoa Do Piaui             | 0.08 | 0.40 | 0.55 | 3200  | 1766  | 1097 |
| BRA | Brazil | 9788 | Lagoa Do Sitio             | 0.25 | 0.65 | 0.89 | 2934  | 782   | 0    |
| BRA | Brazil | 9789 | Lagoinha Do Piaui          | 0.08 | 0.40 | 0.55 | 2459  | 1357  | 843  |
| BRA | Brazil | 9790 | Landri Sales               | 0.17 | 0.49 | 0.65 | 3390  | 1657  | 809  |
| BRA | Brazil | 9791 | Luis Correia               | 0.08 | 0.40 | 0.55 | 20388 | 11249 | 6990 |
| BRA | Brazil | 9792 | Luzilandia                 | 0.17 | 0.49 | 0.65 | 16561 | 8093  | 3951 |
| BRA | Brazil | 9793 | Madeiro                    | 0.30 | 0.66 | 0.87 | 4554  | 1260  | 0    |
| BRA | Brazil | 9794 | Manoel Emidio              | 0.17 | 0.49 | 0.65 | 3436  | 1679  | 820  |
| BRA | Brazil | 9795 | Marcolandia                | 0.27 | 0.74 | 0.96 | 5167  | 619   | 0    |
| BRA | Brazil | 9796 | Marcos Parente             | 0.17 | 0.49 | 0.65 | 2870  | 1402  | 685  |
| BRA | Brazil | 9797 | Massape Do Piaui           | 0.08 | 0.40 | 0.55 | 4620  | 2549  | 1584 |
| BRA | Brazil | 9798 | Matias Olimpio             | 0.17 | 0.49 | 0.65 | 7143  | 3490  | 1704 |
| BRA | Brazil | 9799 | Miguel Alves               | 0.17 | 0.49 | 0.65 | 22440 | 10965 | 5354 |
| BRA | Brazil | 9800 | Miguel Leao                | 0.08 | 0.40 | 0.55 | 903   | 498   | 310  |
| BRA | Brazil | 9801 | Milton Brandao             | 0.08 | 0.40 | 0.55 | 4506  | 2486  | 1545 |
| BRA | Brazil | 9802 | Monsenhor Gil              | 0.08 | 0.40 | 0.55 | 7618  | 4203  | 2612 |
| BRA | Brazil | 9803 | Monsenhor Hipolito         | 0.24 | 0.61 | 0.81 | 4190  | 1408  | 0    |
| BRA | Brazil | 9804 | Monte Alegre Do Piaui      | 0.30 | 0.66 | 0.86 | 5221  | 1460  | 0    |
| BRA | Brazil | 9805 | Morro Cabeca No Tempo      | 0.17 | 0.49 | 0.65 | 2805  | 1370  | 669  |
| BRA | Brazil | 9806 | Morro Do Chapeu Do Piaui   | 0.08 | 0.40 | 0.55 | 4462  | 2462  | 1530 |
| BRA | Brazil | 9807 | Murici Dos Portelas        | 0.17 | 0.49 | 0.65 | 5925  | 2895  | 1414 |
| BRA | Brazil | 9808 | Nazare Do Piaui            | 0.22 | 0.57 | 0.75 | 4213  | 1672  | 384  |
| BRA | Brazil | 9809 | Nossa Senhora De Nazare    | 0.08 | 0.40 | 0.55 | 3608  | 1990  | 1237 |
| BRA | Brazil | 9810 | Nossa Senhora Dos Remedios | 0.08 | 0.40 | 0.55 | 6131  | 3383  | 2102 |
| BRA | Brazil | 9811 | Novo Oriente Do Piaui      | 0.08 | 0.40 | 0.55 | 4736  | 2613  | 1624 |
| BRA | Brazil | 9812 | Novo Santo Antonio         | 0.28 | 0.67 | 0.92 | 2003  | 504   | 0    |
| BRA | Brazil | 9813 | Oeiras                     | 0.08 | 0.40 | 0.55 | 27526 | 15187 | 9438 |

|     |        |      |                          |      |      |      |        |       |       |
|-----|--------|------|--------------------------|------|------|------|--------|-------|-------|
| BRA | Brazil | 9814 | Olho D'agua Do Piaui     | 0.08 | 0.40 | 0.55 | 2128   | 1174  | 730   |
| BRA | Brazil | 9815 | Padre Marcos             | 0.08 | 0.40 | 0.55 | 5193   | 2865  | 1780  |
| BRA | Brazil | 9816 | Paes Landim              | 0.08 | 0.40 | 0.55 | 2756   | 1521  | 945   |
| BRA | Brazil | 9817 | Pajeu Do Piaui           | 0.28 | 0.65 | 0.91 | 2093   | 586   | 0     |
| BRA | Brazil | 9818 | Palmeira Do Piaui        | 0.17 | 0.49 | 0.65 | 3231   | 1579  | 771   |
| BRA | Brazil | 9819 | Palmeirais               | 0.17 | 0.49 | 0.65 | 9847   | 4812  | 2349  |
| BRA | Brazil | 9820 | Paqueta                  | 0.20 | 0.55 | 0.73 | 2567   | 1071  | 322   |
| BRA | Brazil | 9821 | Parnagua                 | 0.17 | 0.49 | 0.65 | 6829   | 3337  | 1629  |
| BRA | Brazil | 9822 | Parnaiba                 | 0.17 | 0.49 | 0.65 | 100729 | 49220 | 24031 |
| BRA | Brazil | 9823 | Passagem Franca Do Piaui | 0.08 | 0.40 | 0.55 | 3866   | 2133  | 1326  |
| BRA | Brazil | 9824 | Patos Do Piaui           | 0.08 | 0.40 | 0.55 | 4887   | 2696  | 1676  |
| BRA | Brazil | 9825 | Paulistana               | 0.27 | 0.66 | 0.90 | 10391  | 2802  | 0     |
| BRA | Brazil | 9826 | Pavussu                  | 0.17 | 0.49 | 0.65 | 2440   | 1192  | 582   |
| BRA | Brazil | 9827 | Pedro Ii                 | 0.08 | 0.40 | 0.55 | 30972  | 17088 | 10619 |
| BRA | Brazil | 9828 | Pedro Laurentino         | 0.08 | 0.40 | 0.55 | 1887   | 1041  | 647   |
| BRA | Brazil | 9829 | Petronio Portela         | 0.08 | 0.40 | 0.55 | 3436   | 1896  | 1178  |
| BRA | Brazil | 9830 | Picos                    | 0.08 | 0.40 | 0.55 | 58959  | 32529 | 20215 |
| BRA | Brazil | 9831 | Pimenteiras              | 0.08 | 0.40 | 0.55 | 8934   | 4929  | 3063  |
| BRA | Brazil | 9832 | Pio Ix                   | 0.08 | 0.40 | 0.55 | 13517  | 7457  | 4634  |
| BRA | Brazil | 9833 | Piracuruca               | 0.08 | 0.40 | 0.55 | 20869  | 11514 | 7155  |
| BRA | Brazil | 9834 | Piripiri                 | 0.08 | 0.40 | 0.55 | 46285  | 25536 | 15869 |
| BRA | Brazil | 9835 | Porto                    | 0.30 | 0.65 | 0.84 | 6073   | 1808  | 0     |
| BRA | Brazil | 9836 | Porto Alegre Do Piaui    | 0.17 | 0.49 | 0.65 | 1819   | 889   | 434   |
| BRA | Brazil | 9837 | Prata Do Piaui           | 0.08 | 0.40 | 0.55 | 2023   | 1116  | 694   |
| BRA | Brazil | 9838 | Queimada Nova            | 0.37 | 0.70 | 0.92 | 4173   | 973   | 0     |
| BRA | Brazil | 9839 | Redencao Do Gurgueia     | 0.17 | 0.49 | 0.65 | 5612   | 2742  | 1339  |
| BRA | Brazil | 9840 | Regeneracao              | 0.24 | 0.61 | 0.83 | 10043  | 3425  | 0     |
| BRA | Brazil | 9841 | Riacho Frio              | 0.17 | 0.49 | 0.65 | 2828   | 1382  | 675   |
| BRA | Brazil | 9842 | Ribeira Do Piaui         | 0.18 | 0.54 | 0.72 | 2929   | 1238  | 371   |
| BRA | Brazil | 9843 | Ribeiro Goncalves        | 0.41 | 0.76 | 0.98 | 2770   | 287   | 0     |
| BRA | Brazil | 9844 | Rio Grande Do Piaui      | 0.17 | 0.49 | 0.65 | 4130   | 2018  | 985   |
| BRA | Brazil | 9845 | Santa Cruz Do Piaui      | 0.08 | 0.40 | 0.55 | 4645   | 2563  | 1593  |
| BRA | Brazil | 9846 | Santa Cruz Dos Milagres  | 0.18 | 0.54 | 0.73 | 2445   | 1027  | 276   |

|     |        |      |                                 |      |      |      |       |      |      |
|-----|--------|------|---------------------------------|------|------|------|-------|------|------|
| BRA | Brazil | 9847 | Santa Filomena                  | 0.17 | 0.49 | 0.65 | 4294  | 2098 | 1025 |
| BRA | Brazil | 9848 | Santa Luz                       | 0.17 | 0.49 | 0.65 | 3762  | 1838 | 898  |
| BRA | Brazil | 9849 | Santa Rosa Do Piaui             | 0.08 | 0.40 | 0.55 | 3813  | 2104 | 1307 |
| BRA | Brazil | 9850 | Santana Do Piaui                | 0.08 | 0.40 | 0.55 | 3966  | 2188 | 1360 |
| BRA | Brazil | 9851 | Santo Antonio De Lisboa         | 0.08 | 0.40 | 0.55 | 4832  | 2666 | 1657 |
| BRA | Brazil | 9852 | Santo Antonio Dos Milagres      | 0.08 | 0.40 | 0.55 | 1553  | 857  | 532  |
| BRA | Brazil | 9853 | Santo Inacio Do Piaui           | 0.20 | 0.58 | 0.79 | 2426  | 908  | 23   |
| BRA | Brazil | 9854 | Sao Braz Do Piaui               | 0.17 | 0.49 | 0.65 | 1929  | 943  | 460  |
| BRA | Brazil | 9855 | Sao Felix Do Piaui              | 0.08 | 0.40 | 0.55 | 2182  | 1204 | 748  |
| BRA | Brazil | 9856 | Sao Francisco De Assis Do Piaui | 0.08 | 0.40 | 0.55 | 4386  | 2420 | 1504 |
| BRA | Brazil | 9857 | Sao Francisco Do Piaui          | 0.18 | 0.52 | 0.68 | 4088  | 1873 | 810  |
| BRA | Brazil | 9858 | Sao Goncalo Do Gurgueia         | 0.17 | 0.49 | 0.65 | 1911  | 934  | 456  |
| BRA | Brazil | 9859 | Sao Goncalo Do Piaui            | 0.08 | 0.40 | 0.55 | 3698  | 2040 | 1268 |
| BRA | Brazil | 9860 | Sao Joao Da Canabrava           | 0.08 | 0.40 | 0.55 | 4111  | 2268 | 1409 |
| BRA | Brazil | 9861 | Sao Joao Da Fronteira           | 0.08 | 0.40 | 0.55 | 6363  | 3511 | 2182 |
| BRA | Brazil | 9862 | Sao Joao Da Serra               | 0.08 | 0.40 | 0.55 | 4308  | 2377 | 1477 |
| BRA | Brazil | 9863 | Sao Joao Da Varjota             | 0.08 | 0.40 | 0.55 | 3488  | 1925 | 1196 |
| BRA | Brazil | 9864 | Sao Joao Do Arraial             | 0.25 | 0.69 | 0.94 | 4596  | 894  | 0    |
| BRA | Brazil | 9865 | Sao Joao Do Piaui               | 0.08 | 0.40 | 0.55 | 15229 | 8402 | 5222 |
| BRA | Brazil | 9866 | Sao Jose Do Divino              | 0.08 | 0.40 | 0.55 | 3931  | 2169 | 1348 |
| BRA | Brazil | 9867 | Sao Jose Do Peixe               | 0.08 | 0.40 | 0.55 | 3150  | 1738 | 1080 |
| BRA | Brazil | 9868 | Sao Jose Do Piaui               | 0.08 | 0.40 | 0.55 | 4448  | 2454 | 1525 |
| BRA | Brazil | 9869 | Sao Juliao                      | 0.23 | 0.64 | 0.89 | 3582  | 1009 | 0    |
| BRA | Brazil | 9870 | Sao Lourenco Do Piaui           | 0.17 | 0.49 | 0.65 | 2919  | 1426 | 696  |
| BRA | Brazil | 9871 | Sao Luis Do Piaui               | 0.08 | 0.40 | 0.55 | 1893  | 1045 | 649  |
| BRA | Brazil | 9872 | Sao Miguel Da Baixa Grande      | 0.08 | 0.40 | 0.55 | 1263  | 697  | 433  |
| BRA | Brazil | 9873 | Sao Miguel Do Fidalgo           | 0.08 | 0.40 | 0.55 | 2178  | 1202 | 747  |
| BRA | Brazil | 9874 | Sao Miguel Do Tapuio            | 0.08 | 0.40 | 0.55 | 13870 | 7653 | 4756 |
| BRA | Brazil | 9875 | Sao Pedro Do Piaui              | 0.22 | 0.59 | 0.78 | 8572  | 3173 | 230  |
| BRA | Brazil | 9876 | Sao Raimundo Nonato             | 0.48 | 0.77 | 0.98 | 11953 | 1159 | 0    |
| BRA | Brazil | 9877 | Sebastiao Barros                | 0.32 | 0.69 | 0.93 | 1795  | 402  | 0    |
| BRA | Brazil | 9878 | Sebastiao Leal                  | 0.17 | 0.49 | 0.65 | 2757  | 1347 | 658  |
| BRA | Brazil | 9879 | Sigefredo Pacheco               | 0.08 | 0.40 | 0.55 | 7409  | 4088 | 2540 |

|     |        |      |                         |      |      |      |        |        |        |
|-----|--------|------|-------------------------|------|------|------|--------|--------|--------|
| BRA | Brazil | 9880 | Simoes                  | 0.08 | 0.40 | 0.55 | 11193  | 6175   | 3838   |
| BRA | Brazil | 9881 | Simplicio Mendes        | 0.08 | 0.40 | 0.55 | 9681   | 5341   | 3319   |
| BRA | Brazil | 9882 | Socorro Do Piaui        | 0.08 | 0.40 | 0.55 | 2880   | 1589   | 988    |
| BRA | Brazil | 9883 | Sussuapara              | 0.19 | 0.55 | 0.72 | 4325   | 1808   | 546    |
| BRA | Brazil | 9884 | Tamboril Do Piaui       | 0.17 | 0.49 | 0.65 | 2190   | 1070   | 523    |
| BRA | Brazil | 9885 | Tanque Do Piaui         | 0.08 | 0.40 | 0.55 | 2108   | 1163   | 723    |
| BRA | Brazil | 9886 | Teresina                | 0.17 | 0.49 | 0.65 | 568395 | 277740 | 135605 |
| BRA | Brazil | 9887 | Uniao                   | 0.31 | 0.69 | 0.92 | 21744  | 4898   | 0      |
| BRA | Brazil | 9888 | Urucui                  | 0.17 | 0.49 | 0.65 | 13814  | 6750   | 3296   |
| BRA | Brazil | 9889 | Valenca Do Piaui        | 0.23 | 0.63 | 0.87 | 12079  | 3573   | 0      |
| BRA | Brazil | 9890 | Varzea Branca           | 0.17 | 0.49 | 0.65 | 3597   | 1758   | 858    |
| BRA | Brazil | 9891 | Varzea Grande           | 0.08 | 0.40 | 0.55 | 3276   | 1807   | 1123   |
| BRA | Brazil | 9892 | Vera Mendes             | 0.08 | 0.40 | 0.55 | 2130   | 1175   | 730    |
| BRA | Brazil | 9893 | Vila Nova Do Piaui      | 0.08 | 0.40 | 0.55 | 2160   | 1192   | 741    |
| BRA | Brazil | 9894 | Wall Ferraz             | 0.08 | 0.40 | 0.55 | 3196   | 1763   | 1096   |
| BRA | Brazil | 9895 | Angra Dos Reis          | 0.08 | 0.40 | 0.55 | 144864 | 79925  | 49669  |
| BRA | Brazil | 9896 | Aperibe                 | 0.08 | 0.40 | 0.55 | 8491   | 4685   | 2911   |
| BRA | Brazil | 9897 | Araruama                | 0.08 | 0.40 | 0.55 | 97214  | 53636  | 33332  |
| BRA | Brazil | 9898 | Areal                   | 0.17 | 0.49 | 0.65 | 7659   | 3742   | 1827   |
| BRA | Brazil | 9899 | Armacao De Buzios       | 0.08 | 0.40 | 0.55 | 23943  | 13210  | 8209   |
| BRA | Brazil | 9900 | Arraial Do Cabo         | 0.08 | 0.40 | 0.55 | 21108  | 11646  | 7237   |
| BRA | Brazil | 9901 | Barra Do Pirai          | 0.08 | 0.40 | 0.55 | 73332  | 40459  | 25143  |
| BRA | Brazil | 9902 | Barra Mansa             | 0.08 | 0.40 | 0.55 | 137878 | 76071  | 47274  |
| BRA | Brazil | 9903 | Belford Roxo            | 0.08 | 0.40 | 0.55 | 381794 | 210646 | 130905 |
| BRA | Brazil | 9904 | Bom Jardim              | 0.08 | 0.40 | 0.55 | 20027  | 11050  | 6867   |
| BRA | Brazil | 9905 | Bom Jesus Do Itabapoana | 0.08 | 0.40 | 0.55 | 26455  | 14596  | 9071   |
| BRA | Brazil | 9906 | Cabo Frio               | 0.08 | 0.40 | 0.55 | 165584 | 91357  | 56773  |
| BRA | Brazil | 9907 | Cachoeiras De Macacu    | 0.08 | 0.40 | 0.55 | 43247  | 23861  | 14828  |
| BRA | Brazil | 9908 | Cambuci                 | 0.08 | 0.40 | 0.55 | 10891  | 6009   | 3734   |
| BRA | Brazil | 9909 | Campos Dos Goytacazes   | 0.08 | 0.40 | 0.55 | 368567 | 203348 | 126369 |
| BRA | Brazil | 9910 | Cantagalo               | 0.17 | 0.49 | 0.65 | 11381  | 5561   | 2715   |
| BRA | Brazil | 9911 | Carapebus               | 0.08 | 0.40 | 0.55 | 12306  | 6789   | 4219   |
| BRA | Brazil | 9912 | Cardoso Moreira         | 0.08 | 0.40 | 0.55 | 9423   | 5199   | 3231   |



|     |        |      |                             |      |      |      |        |        |        |
|-----|--------|------|-----------------------------|------|------|------|--------|--------|--------|
| BRA | Brazil | 9913 | Carmo                       | 0.17 | 0.49 | 0.65 | 11979  | 5854   | 2858   |
| BRA | Brazil | 9914 | Casimiro De Abreu           | 0.08 | 0.40 | 0.55 | 36257  | 20004  | 12431  |
| BRA | Brazil | 9915 | Comendador Levy Gasparian   | 0.17 | 0.49 | 0.65 | 4734   | 2313   | 1129   |
| BRA | Brazil | 9916 | Conceicao De Macabu         | 0.08 | 0.40 | 0.55 | 16667  | 9196   | 5715   |
| BRA | Brazil | 9917 | Cordeiro                    | 0.08 | 0.40 | 0.55 | 16266  | 8975   | 5577   |
| BRA | Brazil | 9918 | Duas Barras                 | 0.17 | 0.49 | 0.65 | 7209   | 3523   | 1720   |
| BRA | Brazil | 9919 | Duque De Caxias             | 0.08 | 0.40 | 0.55 | 663524 | 366083 | 227500 |
| BRA | Brazil | 9920 | Engenheiro Paulo De Frontin | 0.08 | 0.40 | 0.55 | 10971  | 6053   | 3761   |
| BRA | Brazil | 9921 | Guapimirim                  | 0.08 | 0.40 | 0.55 | 46030  | 25396  | 15782  |
| BRA | Brazil | 9922 | Iguaba Grande               | 0.08 | 0.40 | 0.55 | 18900  | 10427  | 6480   |
| BRA | Brazil | 9923 | Itaborai                    | 0.08 | 0.40 | 0.55 | 174604 | 96334  | 59866  |
| BRA | Brazil | 9924 | Itaguaí                     | 0.08 | 0.40 | 0.55 | 96652  | 53325  | 33139  |
| BRA | Brazil | 9925 | Italva                      | 0.08 | 0.40 | 0.55 | 11184  | 6170   | 3835   |
| BRA | Brazil | 9926 | Itaocara                    | 0.08 | 0.40 | 0.55 | 16899  | 9323   | 5794   |
| BRA | Brazil | 9927 | Itaperuna                   | 0.17 | 0.49 | 0.65 | 65761  | 32133  | 15689  |
| BRA | Brazil | 9928 | Itatiaia                    | 0.17 | 0.49 | 0.65 | 20321  | 9930   | 4848   |
| BRA | Brazil | 9929 | Japeri                      | 0.08 | 0.40 | 0.55 | 69873  | 38551  | 23957  |
| BRA | Brazil | 9930 | Laje Do Muriae              | 0.17 | 0.49 | 0.65 | 4593   | 2244   | 1096   |
| BRA | Brazil | 9931 | Macaé                       | 0.08 | 0.40 | 0.55 | 190876 | 105311 | 65445  |
| BRA | Brazil | 9932 | Macuco                      | 0.08 | 0.40 | 0.55 | 5470   | 3018   | 1876   |
| BRA | Brazil | 9933 | Mage                        | 0.08 | 0.40 | 0.55 | 178343 | 98396  | 61148  |
| BRA | Brazil | 9934 | Mangaratiba                 | 0.08 | 0.40 | 0.55 | 28602  | 15780  | 9807   |
| BRA | Brazil | 9935 | Marica                      | 0.08 | 0.40 | 0.55 | 121946 | 67281  | 41811  |
| BRA | Brazil | 9936 | Mendes                      | 0.08 | 0.40 | 0.55 | 12295  | 6783   | 4215   |
| BRA | Brazil | 9937 | Miguel Pereira              | 0.08 | 0.40 | 0.55 | 18085  | 9978   | 6201   |
| BRA | Brazil | 9938 | Miracema                    | 0.17 | 0.49 | 0.65 | 17377  | 8491   | 4146   |
| BRA | Brazil | 9939 | Natividade                  | 0.31 | 0.73 | 0.96 | 7701   | 1145   | 0      |
| BRA | Brazil | 9940 | Nilópolis                   | 0.08 | 0.40 | 0.55 | 120993 | 66755  | 41485  |
| BRA | Brazil | 9941 | Niteroi                     | 0.08 | 0.40 | 0.55 | 364993 | 201376 | 125144 |
| BRA | Brazil | 9942 | Nova Friburgo               | 0.08 | 0.40 | 0.55 | 138686 | 76516  | 47551  |
| BRA | Brazil | 9943 | Nova Iguacu                 | 0.08 | 0.40 | 0.55 | 729335 | 402392 | 250065 |
| BRA | Brazil | 9944 | Paracambi                   | 0.08 | 0.40 | 0.55 | 38453  | 21215  | 13184  |
| BRA | Brazil | 9945 | Paraíba Do Sul              | 0.17 | 0.49 | 0.65 | 28148  | 13754  | 6715   |

|     |        |      |                               |      |      |      |         |         |         |
|-----|--------|------|-------------------------------|------|------|------|---------|---------|---------|
| BRA | Brazil | 9946 | Parati                        | 0.08 | 0.40 | 0.55 | 33060   | 18240   | 11335   |
| BRA | Brazil | 9947 | Paty Do Alferes               | 0.08 | 0.40 | 0.55 | 20681   | 11410   | 7091    |
| BRA | Brazil | 9948 | Petropolis                    | 0.17 | 0.49 | 0.65 | 194474  | 95028   | 46397   |
| BRA | Brazil | 9949 | Pinheiral                     | 0.08 | 0.40 | 0.55 | 17009   | 9384    | 5832    |
| BRA | Brazil | 9950 | Pirai                         | 0.08 | 0.40 | 0.55 | 21997   | 12136   | 7542    |
| BRA | Brazil | 9951 | Porciuncula                   | 0.17 | 0.49 | 0.65 | 12239   | 5981    | 2920    |
| BRA | Brazil | 9952 | Porto Real                    | 0.08 | 0.40 | 0.55 | 13841   | 7636    | 4746    |
| BRA | Brazil | 9953 | Quatis                        | 0.17 | 0.49 | 0.65 | 9446    | 4616    | 2254    |
| BRA | Brazil | 9954 | Queimados                     | 0.08 | 0.40 | 0.55 | 112140  | 61871   | 38449   |
| BRA | Brazil | 9955 | Quissama                      | 0.08 | 0.40 | 0.55 | 18113   | 9993    | 6210    |
| BRA | Brazil | 9956 | Resende                       | 0.17 | 0.49 | 0.65 | 83089   | 40600   | 19823   |
| BRA | Brazil | 9957 | Rio Bonito                    | 0.08 | 0.40 | 0.55 | 44418   | 24507   | 15230   |
| BRA | Brazil | 9958 | Rio Claro                     | 0.08 | 0.40 | 0.55 | 13641   | 7526    | 4677    |
| BRA | Brazil | 9959 | Rio Das Flores                | 0.17 | 0.49 | 0.65 | 5676    | 2774    | 1354    |
| BRA | Brazil | 9960 | Rio Das Ostras                | 0.08 | 0.40 | 0.55 | 130039  | 71746   | 44586   |
| BRA | Brazil | 9961 | Rio De Janeiro                | 0.08 | 0.40 | 0.55 | 4829400 | 2661302 | 1650584 |
| BRA | Brazil | 9962 | Santa Maria Madalena          | 0.08 | 0.40 | 0.55 | 7670    | 4231    | 2630    |
| BRA | Brazil | 9963 | Santo Antonio De Padua        | 0.17 | 0.49 | 0.65 | 27198   | 13290   | 6489    |
| BRA | Brazil | 9964 | Sao Fidelis                   | 0.08 | 0.40 | 0.55 | 28695   | 15832   | 9839    |
| BRA | Brazil | 9965 | Sao Francisco De Itabapoana   | 0.08 | 0.40 | 0.55 | 30481   | 16817   | 10451   |
| BRA | Brazil | 9966 | Sao Goncalo                   | 0.08 | 0.40 | 0.55 | 783134  | 432075  | 268511  |
| BRA | Brazil | 9967 | Sao Joao Da Barra             | 0.08 | 0.40 | 0.55 | 26115   | 14408   | 8954    |
| BRA | Brazil | 9968 | Sao Joao De Meriti            | 0.08 | 0.40 | 0.55 | 334813  | 184725  | 114796  |
| BRA | Brazil | 9969 | Sao Jose De Uba               | 0.08 | 0.40 | 0.55 | 5370    | 2963    | 1841    |
| BRA | Brazil | 9970 | Sao Jose Do Vale Do Rio Preto | 0.17 | 0.49 | 0.65 | 13557   | 6625    | 3234    |
| BRA | Brazil | 9971 | Sao Pedro Da Aldeia           | 0.08 | 0.40 | 0.55 | 79328   | 43767   | 27199   |
| BRA | Brazil | 9972 | Sao Sebastiao Do Alto         | 0.08 | 0.40 | 0.55 | 6641    | 3664    | 2277    |
| BRA | Brazil | 9973 | Sapucaia                      | 0.17 | 0.49 | 0.65 | 10889   | 5321    | 2598    |
| BRA | Brazil | 9974 | Saquarema                     | 0.08 | 0.40 | 0.55 | 65454   | 36113   | 22442   |
| BRA | Brazil | 9975 | Seropedica                    | 0.08 | 0.40 | 0.55 | 61937   | 34172   | 21236   |
| BRA | Brazil | 9976 | Silva Jardim                  | 0.08 | 0.40 | 0.55 | 15946   | 8798    | 5467    |
| BRA | Brazil | 9977 | Sumidouro                     | 0.17 | 0.49 | 0.65 | 10125   | 4947    | 2416    |
| BRA | Brazil | 9978 | Tangua                        | 0.08 | 0.40 | 0.55 | 24187   | 13345   | 8293    |

|     |        |       |                         |      |      |      |        |        |       |
|-----|--------|-------|-------------------------|------|------|------|--------|--------|-------|
| BRA | Brazil | 9979  | Teresopolis             | 0.08 | 0.40 | 0.55 | 132560 | 73137  | 45451 |
| BRA | Brazil | 9980  | Trajano De Morais       | 0.08 | 0.40 | 0.55 | 7809   | 4308   | 2677  |
| BRA | Brazil | 9981  | Tres Rios               | 0.17 | 0.49 | 0.65 | 52353  | 25582  | 12490 |
| BRA | Brazil | 9982  | Valenca                 | 0.17 | 0.49 | 0.65 | 49217  | 24049  | 11742 |
| BRA | Brazil | 9983  | Varre-sai               | 0.17 | 0.49 | 0.65 | 6706   | 3277   | 1600  |
| BRA | Brazil | 9984  | Vassouras               | 0.08 | 0.40 | 0.55 | 27183  | 14998  | 9320  |
| BRA | Brazil | 9985  | Volta Redonda           | 0.08 | 0.43 | 0.61 | 196237 | 100021 | 50504 |
| BRA | Brazil | 9986  | Acari                   | 0.08 | 0.40 | 0.55 | 8200   | 4524   | 2811  |
| BRA | Brazil | 9987  | Acu                     | 0.08 | 0.40 | 0.55 | 41720  | 23018  | 14304 |
| BRA | Brazil | 9988  | Afonso Bezerra          | 0.08 | 0.40 | 0.55 | 7781   | 4293   | 2668  |
| BRA | Brazil | 9989  | Agua Nova               | 0.08 | 0.40 | 0.55 | 2225   | 1227   | 763   |
| BRA | Brazil | 9990  | Alexandria              | 0.08 | 0.40 | 0.55 | 10365  | 5719   | 3554  |
| BRA | Brazil | 9991  | Almino Afonso           | 0.08 | 0.40 | 0.55 | 4045   | 2232   | 1387  |
| BRA | Brazil | 9992  | Alto Do Rodrigues       | 0.08 | 0.40 | 0.55 | 10578  | 5836   | 3627  |
| BRA | Brazil | 9993  | Angicos                 | 0.08 | 0.40 | 0.55 | 9333   | 5149   | 3200  |
| BRA | Brazil | 9994  | Antonio Martins         | 0.08 | 0.40 | 0.55 | 5191   | 2864   | 1780  |
| BRA | Brazil | 9995  | Apodi                   | 0.08 | 0.40 | 0.55 | 26387  | 14558  | 9047  |
| BRA | Brazil | 9996  | Areia Branca            | 0.08 | 0.40 | 0.55 | 18483  | 10198  | 6337  |
| BRA | Brazil | 9997  | Ares                    | 0.08 | 0.40 | 0.55 | 9726   | 5366   | 3335  |
| BRA | Brazil | 9998  | Augusto Severo          | 0.08 | 0.40 | 0.55 | 6914   | 3815   | 2371  |
| BRA | Brazil | 9999  | Baia Formosa            | 0.08 | 0.40 | 0.55 | 6885   | 3799   | 2361  |
| BRA | Brazil | 10000 | Barauna                 | 0.08 | 0.40 | 0.55 | 20647  | 11391  | 7079  |
| BRA | Brazil | 10001 | Barcelona               | 0.08 | 0.40 | 0.55 | 2847   | 1571   | 976   |
| BRA | Brazil | 10002 | Bento Fernandes         | 0.08 | 0.40 | 0.55 | 4477   | 2470   | 1535  |
| BRA | Brazil | 10003 | Bodo                    | 0.08 | 0.40 | 0.55 | 1728   | 953    | 592   |
| BRA | Brazil | 10004 | Bom Jesus               | 0.08 | 0.40 | 0.55 | 7435   | 4102   | 2549  |
| BRA | Brazil | 10005 | Brejinho                | 0.08 | 0.40 | 0.55 | 5575   | 3076   | 1912  |
| BRA | Brazil | 10006 | Caicara Do Norte        | 0.08 | 0.40 | 0.55 | 2364   | 1304   | 810   |
| BRA | Brazil | 10007 | Caicara Do Rio Do Vento | 0.08 | 0.40 | 0.55 | 2814   | 1552   | 965   |
| BRA | Brazil | 10008 | Caico                   | 0.08 | 0.40 | 0.55 | 48954  | 27009  | 16785 |
| BRA | Brazil | 10009 | Campo Redondo           | 0.08 | 0.40 | 0.55 | 8223   | 4537   | 2819  |
| BRA | Brazil | 10010 | Canguaretama            | 0.08 | 0.40 | 0.55 | 24280  | 13396  | 8325  |
| BRA | Brazil | 10011 | Caraubas                | 0.08 | 0.40 | 0.55 | 14905  | 8223   | 5110  |

|     |        |       |                            |      |      |      |       |       |       |
|-----|--------|-------|----------------------------|------|------|------|-------|-------|-------|
| BRA | Brazil | 10012 | Carnauba Dos Dantas        | 0.08 | 0.40 | 0.55 | 5879  | 3243  | 2016  |
| BRA | Brazil | 10013 | Carnaubais                 | 0.08 | 0.40 | 0.55 | 8597  | 4743  | 2948  |
| BRA | Brazil | 10014 | Ceara-mirim                | 0.08 | 0.40 | 0.55 | 53882 | 29728 | 18474 |
| BRA | Brazil | 10015 | Cerro Cora                 | 0.08 | 0.40 | 0.55 | 8213  | 4531  | 2816  |
| BRA | Brazil | 10016 | Coronel Ezequiel           | 0.08 | 0.40 | 0.55 | 4244  | 2342  | 1455  |
| BRA | Brazil | 10017 | Coronel Joao Pessoa        | 0.08 | 0.40 | 0.55 | 3581  | 1976  | 1228  |
| BRA | Brazil | 10018 | Cruzeta                    | 0.08 | 0.40 | 0.55 | 5814  | 3208  | 1993  |
| BRA | Brazil | 10019 | Currais Novos              | 0.08 | 0.40 | 0.55 | 33085 | 18254 | 11344 |
| BRA | Brazil | 10020 | Doutor Severiano           | 0.08 | 0.40 | 0.55 | 5071  | 2798  | 1739  |
| BRA | Brazil | 10021 | Encanto                    | 0.08 | 0.40 | 0.55 | 3996  | 2205  | 1370  |
| BRA | Brazil | 10022 | Equador                    | 0.08 | 0.40 | 0.55 | 5014  | 2767  | 1719  |
| BRA | Brazil | 10023 | Espirito Santo             | 0.08 | 0.40 | 0.55 | 8974  | 4951  | 3077  |
| BRA | Brazil | 10024 | Extremoz                   | 0.08 | 0.40 | 0.55 | 21550 | 11890 | 7389  |
| BRA | Brazil | 10025 | Felipe Guerra              | 0.08 | 0.40 | 0.55 | 4484  | 2474  | 1537  |
| BRA | Brazil | 10026 | Fernando Pedroza           | 0.08 | 0.40 | 0.55 | 1833  | 1011  | 629   |
| BRA | Brazil | 10027 | Florania                   | 0.08 | 0.40 | 0.55 | 7151  | 3945  | 2452  |
| BRA | Brazil | 10028 | Francisco Dantas           | 0.08 | 0.40 | 0.55 | 2535  | 1399  | 869   |
| BRA | Brazil | 10029 | Frutuoso Gomes             | 0.08 | 0.40 | 0.55 | 3130  | 1727  | 1073  |
| BRA | Brazil | 10030 | Galinhos                   | 0.08 | 0.40 | 0.55 | 1880  | 1037  | 645   |
| BRA | Brazil | 10031 | Goianinha                  | 0.08 | 0.40 | 0.55 | 18195 | 10039 | 6239  |
| BRA | Brazil | 10032 | Governador Dix-sept Rosado | 0.08 | 0.40 | 0.55 | 9827  | 5422  | 3369  |
| BRA | Brazil | 10033 | Grossos                    | 0.08 | 0.40 | 0.55 | 8527  | 4704  | 2924  |
| BRA | Brazil | 10034 | Guamare                    | 0.08 | 0.40 | 0.55 | 10763 | 5938  | 3690  |
| BRA | Brazil | 10035 | Ielmo Marinho              | 0.08 | 0.40 | 0.55 | 9919  | 5473  | 3401  |
| BRA | Brazil | 10036 | Ipanguacu                  | 0.08 | 0.40 | 0.55 | 10883 | 6005  | 3732  |
| BRA | Brazil | 10037 | Ipueira                    | 0.08 | 0.40 | 0.55 | 1737  | 958   | 596   |
| BRA | Brazil | 10038 | Itaja                      | 0.08 | 0.40 | 0.55 | 5442  | 3003  | 1866  |
| BRA | Brazil | 10039 | Itau                       | 0.08 | 0.40 | 0.55 | 4110  | 2267  | 1409  |
| BRA | Brazil | 10040 | Jacana                     | 0.08 | 0.40 | 0.55 | 4004  | 2209  | 1373  |
| BRA | Brazil | 10041 | Jandaira                   | 0.08 | 0.40 | 0.55 | 4968  | 2741  | 1703  |
| BRA | Brazil | 10042 | Janduis                    | 0.08 | 0.40 | 0.55 | 4004  | 2209  | 1373  |
| BRA | Brazil | 10043 | Januario Cicco             | 0.08 | 0.40 | 0.55 | 7030  | 3878  | 2410  |
| BRA | Brazil | 10044 | Japi                       | 0.08 | 0.40 | 0.55 | 3912  | 2159  | 1341  |

|     |        |       |                       |      |      |      |        |        |        |
|-----|--------|-------|-----------------------|------|------|------|--------|--------|--------|
| BRA | Brazil | 10045 | Jardim De Angicos     | 0.08 | 0.40 | 0.55 | 1831   | 1010   | 628    |
| BRA | Brazil | 10046 | Jardim De Piranhas    | 0.08 | 0.40 | 0.55 | 11420  | 6301   | 3916   |
| BRA | Brazil | 10047 | Jardim Do Serido      | 0.08 | 0.40 | 0.55 | 9097   | 5019   | 3119   |
| BRA | Brazil | 10048 | Joao Camara           | 0.08 | 0.40 | 0.55 | 25966  | 14326  | 8903   |
| BRA | Brazil | 10049 | Joao Dias             | 0.08 | 0.40 | 0.55 | 1825   | 1007   | 626    |
| BRA | Brazil | 10050 | Jose Da Penha         | 0.08 | 0.40 | 0.55 | 3777   | 2084   | 1295   |
| BRA | Brazil | 10051 | Jucurutu              | 0.08 | 0.40 | 0.55 | 13289  | 7332   | 4556   |
| BRA | Brazil | 10052 | Lagoa D'anta          | 0.08 | 0.40 | 0.55 | 4772   | 2633   | 1636   |
| BRA | Brazil | 10053 | Lagoa De Pedras       | 0.08 | 0.40 | 0.55 | 5545   | 3060   | 1901   |
| BRA | Brazil | 10054 | Lagoa De Velhos       | 0.08 | 0.40 | 0.55 | 2087   | 1152   | 716    |
| BRA | Brazil | 10055 | Lagoa Nova            | 0.08 | 0.40 | 0.55 | 10382  | 5728   | 3560   |
| BRA | Brazil | 10056 | Lagoa Salgada         | 0.08 | 0.40 | 0.55 | 4629   | 2554   | 1587   |
| BRA | Brazil | 10057 | Lajes                 | 0.08 | 0.40 | 0.55 | 8090   | 4463   | 2774   |
| BRA | Brazil | 10058 | Lajes Pintadas        | 0.08 | 0.40 | 0.55 | 3258   | 1798   | 1117   |
| BRA | Brazil | 10059 | Lucrecia              | 0.08 | 0.40 | 0.55 | 2252   | 1242   | 772    |
| BRA | Brazil | 10060 | Luis Gomes            | 0.08 | 0.40 | 0.55 | 6683   | 3687   | 2291   |
| BRA | Brazil | 10061 | Macaiba               | 0.08 | 0.40 | 0.55 | 54755  | 30210  | 18774  |
| BRA | Brazil | 10062 | Macau                 | 0.08 | 0.40 | 0.55 | 22902  | 12636  | 7852   |
| BRA | Brazil | 10063 | Major Sales           | 0.08 | 0.40 | 0.55 | 3065   | 1691   | 1051   |
| BRA | Brazil | 10064 | Marcelino Vieira      | 0.08 | 0.40 | 0.55 | 6319   | 3487   | 2167   |
| BRA | Brazil | 10065 | Martins               | 0.08 | 0.40 | 0.55 | 6487   | 3579   | 2224   |
| BRA | Brazil | 10066 | Maxaranguape          | 0.08 | 0.40 | 0.55 | 8296   | 4577   | 2844   |
| BRA | Brazil | 10067 | Messias Targino       | 0.08 | 0.40 | 0.55 | 3352   | 1849   | 1149   |
| BRA | Brazil | 10068 | Montanhas             | 0.08 | 0.40 | 0.55 | 7743   | 4272   | 2655   |
| BRA | Brazil | 10069 | Monte Alegre          | 0.08 | 0.40 | 0.55 | 19648  | 10840  | 6737   |
| BRA | Brazil | 10070 | Monte Das Gameleiras  | 0.08 | 0.40 | 0.55 | 1746   | 964    | 599    |
| BRA | Brazil | 10071 | Mossoro               | 0.08 | 0.40 | 0.55 | 213014 | 117525 | 73036  |
| BRA | Brazil | 10072 | Natal                 | 0.08 | 0.40 | 0.55 | 645485 | 356130 | 221316 |
| BRA | Brazil | 10073 | Nisia Floresta        | 0.08 | 0.40 | 0.55 | 25089  | 13842  | 8602   |
| BRA | Brazil | 10074 | Nova Cruz             | 0.08 | 0.40 | 0.55 | 23718  | 13086  | 8132   |
| BRA | Brazil | 10075 | Olho-d'agua Do Borges | 0.08 | 0.40 | 0.55 | 3178   | 1753   | 1090   |
| BRA | Brazil | 10076 | Ouro Branco           | 0.08 | 0.40 | 0.55 | 3361   | 1854   | 1152   |
| BRA | Brazil | 10077 | Parana                | 0.60 | 0.90 | 0.97 | 784    | 0      | 0      |

|     |        |       |                      |      |      |      |        |       |       |
|-----|--------|-------|----------------------|------|------|------|--------|-------|-------|
| BRA | Brazil | 10078 | Parau                | 0.08 | 0.40 | 0.55 | 3048   | 1681  | 1045  |
| BRA | Brazil | 10079 | Parazinho            | 0.08 | 0.40 | 0.55 | 2985   | 1647  | 1023  |
| BRA | Brazil | 10080 | Parelhas             | 0.08 | 0.40 | 0.55 | 15596  | 8605  | 5347  |
| BRA | Brazil | 10081 | Parnamirim           | 0.08 | 0.40 | 0.55 | 176278 | 97257 | 60440 |
| BRA | Brazil | 10082 | Passa E Fica         | 0.08 | 0.40 | 0.55 | 9125   | 5034  | 3129  |
| BRA | Brazil | 10083 | Passagem             | 0.08 | 0.40 | 0.55 | 2607   | 1439  | 894   |
| BRA | Brazil | 10084 | Patu                 | 0.08 | 0.40 | 0.55 | 9199   | 5075  | 3154  |
| BRA | Brazil | 10085 | Pau Dos Ferros       | 0.08 | 0.40 | 0.55 | 22017  | 12147 | 7549  |
| BRA | Brazil | 10086 | Pedra Grande         | 0.08 | 0.40 | 0.55 | 2135   | 1178  | 732   |
| BRA | Brazil | 10087 | Pedra Preta          | 0.08 | 0.40 | 0.55 | 1808   | 998   | 620   |
| BRA | Brazil | 10088 | Pedro Avelino        | 0.08 | 0.40 | 0.55 | 5536   | 3054  | 1898  |
| BRA | Brazil | 10089 | Pedro Velho          | 0.08 | 0.40 | 0.55 | 11282  | 6224  | 3868  |
| BRA | Brazil | 10090 | Pendencias           | 0.08 | 0.40 | 0.55 | 10309  | 5688  | 3535  |
| BRA | Brazil | 10091 | Piloes               | 0.08 | 0.40 | 0.55 | 2630   | 1451  | 902   |
| BRA | Brazil | 10092 | Poco Branco          | 0.08 | 0.40 | 0.55 | 10037  | 5538  | 3441  |
| BRA | Brazil | 10093 | Portalegre           | 0.08 | 0.40 | 0.55 | 5367   | 2961  | 1840  |
| BRA | Brazil | 10094 | Porto Do Mangue      | 0.08 | 0.40 | 0.55 | 4850   | 2676  | 1663  |
| BRA | Brazil | 10095 | Presidente Juscelino | 0.08 | 0.40 | 0.55 | 7392   | 4079  | 2535  |
| BRA | Brazil | 10096 | Pureza               | 0.08 | 0.40 | 0.55 | 6900   | 3807  | 2366  |
| BRA | Brazil | 10097 | Rafael Fernandes     | 0.08 | 0.40 | 0.55 | 3720   | 2052  | 1275  |
| BRA | Brazil | 10098 | Rafael Godeiro       | 0.08 | 0.40 | 0.55 | 2295   | 1266  | 787   |
| BRA | Brazil | 10099 | Riacho Da Cruz       | 0.08 | 0.40 | 0.55 | 2543   | 1403  | 872   |
| BRA | Brazil | 10100 | Riacho De Santana    | 0.08 | 0.40 | 0.55 | 3115   | 1719  | 1068  |
| BRA | Brazil | 10101 | Riachuelo            | 0.08 | 0.40 | 0.55 | 5851   | 3228  | 2006  |
| BRA | Brazil | 10102 | Rio Do Fogo          | 0.08 | 0.40 | 0.55 | 6438   | 3552  | 2207  |
| BRA | Brazil | 10103 | Rodolfo Fernandes    | 0.08 | 0.40 | 0.55 | 3237   | 1786  | 1110  |
| BRA | Brazil | 10104 | Ruy Barbosa          | 0.08 | 0.40 | 0.55 | 2612   | 1441  | 896   |
| BRA | Brazil | 10105 | Santa Cruz           | 0.08 | 0.40 | 0.55 | 28436  | 15689 | 9750  |
| BRA | Brazil | 10106 | Santa Maria          | 1.00 | 1.00 | 1.00 | 0      | 0     | 0     |
| BRA | Brazil | 10107 | Santana Do Matos     | 0.08 | 0.40 | 0.55 | 9601   | 5297  | 3292  |
| BRA | Brazil | 10108 | Santana Do Serido    | 0.08 | 0.40 | 0.55 | 1894   | 1045  | 649   |
| BRA | Brazil | 10109 | Santo Antonio        | 0.08 | 0.40 | 0.55 | 16857  | 9300  | 5780  |
| BRA | Brazil | 10110 | Sao Bento Do Norte   | 0.08 | 0.40 | 0.55 | 3739   | 2063  | 1282  |

|     |        |       |                          |      |      |      |       |       |       |
|-----|--------|-------|--------------------------|------|------|------|-------|-------|-------|
| BRA | Brazil | 10111 | Sao Bento Do Trairi      | 0.08 | 0.40 | 0.55 | 2995  | 1653  | 1027  |
| BRA | Brazil | 10112 | Sao Fernando             | 0.08 | 0.40 | 0.55 | 2702  | 1490  | 926   |
| BRA | Brazil | 10113 | Sao Francisco Do Oeste   | 0.08 | 0.40 | 0.55 | 2815  | 1553  | 965   |
| BRA | Brazil | 10114 | Sao Goncalo Do Amarante  | 0.08 | 0.40 | 0.55 | 79559 | 43895 | 27278 |
| BRA | Brazil | 10115 | Sao Joao Do Sabugi       | 0.08 | 0.40 | 0.55 | 4514  | 2490  | 1548  |
| BRA | Brazil | 10116 | Sao Jose De Mipibu       | 0.08 | 0.40 | 0.55 | 29776 | 16428 | 10209 |
| BRA | Brazil | 10117 | Sao Jose Do Campestre    | 0.08 | 0.40 | 0.55 | 9462  | 5221  | 3244  |
| BRA | Brazil | 10118 | Sao Jose Do Serido       | 0.08 | 0.40 | 0.55 | 3390  | 1870  | 1162  |
| BRA | Brazil | 10119 | Sao Miguel               | 0.08 | 0.40 | 0.55 | 17172 | 9474  | 5888  |
| BRA | Brazil | 10120 | Sao Miguel De Touros     | 0.08 | 0.40 | 0.55 | 5503  | 3036  | 1887  |
| BRA | Brazil | 10121 | Sao Paulo Do Potengi     | 0.08 | 0.40 | 0.55 | 12262 | 6765  | 4204  |
| BRA | Brazil | 10122 | Sao Pedro                | 0.53 | 0.77 | 0.88 | 1631  | 172   | 0     |
| BRA | Brazil | 10123 | Sao Rafael               | 0.08 | 0.40 | 0.55 | 5754  | 3175  | 1973  |
| BRA | Brazil | 10124 | Sao Tome                 | 0.08 | 0.40 | 0.55 | 8210  | 4530  | 2815  |
| BRA | Brazil | 10125 | Sao Vicente              | 0.08 | 0.40 | 0.55 | 5269  | 2907  | 1806  |
| BRA | Brazil | 10126 | Senador Eloi De Souza    | 0.08 | 0.40 | 0.55 | 4467  | 2465  | 1532  |
| BRA | Brazil | 10127 | Senador Georgino Avelino | 0.08 | 0.40 | 0.55 | 3527  | 1946  | 1209  |
| BRA | Brazil | 10128 | Serra De Sao Bento       | 0.08 | 0.40 | 0.55 | 4185  | 2309  | 1435  |
| BRA | Brazil | 10129 | Serra Do Mel             | 0.08 | 0.40 | 0.55 | 8412  | 4641  | 2884  |
| BRA | Brazil | 10130 | Serra Negra Do Norte     | 0.08 | 0.40 | 0.55 | 5852  | 3229  | 2007  |
| BRA | Brazil | 10131 | Serrinha                 | 0.08 | 0.40 | 0.55 | 4707  | 2597  | 1614  |
| BRA | Brazil | 10132 | Serrinha Dos Pintos      | 0.08 | 0.40 | 0.55 | 3355  | 1851  | 1150  |
| BRA | Brazil | 10133 | Severiano Melo           | 0.08 | 0.40 | 0.55 | 3087  | 1703  | 1059  |
| BRA | Brazil | 10134 | Sitio Novo               | 0.08 | 0.40 | 0.55 | 3895  | 2149  | 1336  |
| BRA | Brazil | 10135 | Taboleiro Grande         | 0.08 | 0.40 | 0.55 | 1810  | 998   | 620   |
| BRA | Brazil | 10136 | Taipu                    | 0.08 | 0.40 | 0.55 | 8795  | 4853  | 3016  |
| BRA | Brazil | 10137 | Tangara                  | 0.24 | 0.62 | 0.83 | 9075  | 2990  | 0     |
| BRA | Brazil | 10138 | Tenente Ananias          | 0.08 | 0.40 | 0.55 | 7786  | 4296  | 2669  |
| BRA | Brazil | 10139 | Tenente Laurentino Cruz  | 0.08 | 0.40 | 0.55 | 3724  | 2055  | 1277  |
| BRA | Brazil | 10140 | Tibau                    | 0.08 | 0.40 | 0.55 | 3027  | 1670  | 1038  |
| BRA | Brazil | 10141 | Tibau Do Sul             | 0.08 | 0.40 | 0.55 | 9933  | 5480  | 3406  |
| BRA | Brazil | 10142 | Timbauba Dos Batistas    | 0.08 | 0.40 | 0.55 | 1783  | 984   | 611   |
| BRA | Brazil | 10143 | Touros                   | 0.08 | 0.40 | 0.55 | 27189 | 15001 | 9322  |

|     |        |       |                  |      |      |      |        |       |      |
|-----|--------|-------|------------------|------|------|------|--------|-------|------|
| BRA | Brazil | 10144 | Triunfo Potiguar | 0.08 | 0.40 | 0.55 | 2416   | 1333  | 828  |
| BRA | Brazil | 10145 | Umarizal         | 0.08 | 0.40 | 0.55 | 7884   | 4350  | 2703 |
| BRA | Brazil | 10146 | Upanema          | 0.08 | 0.40 | 0.55 | 10170  | 5611  | 3487 |
| BRA | Brazil | 10147 | Varzea           | 0.08 | 0.40 | 0.55 | 9478   | 5229  | 3250 |
| BRA | Brazil | 10148 | Venha-ver        | 0.08 | 0.40 | 0.55 | 3124   | 1724  | 1071 |
| BRA | Brazil | 10149 | Vera Cruz        | 0.08 | 0.40 | 0.55 | 4970   | 2742  | 1704 |
| BRA | Brazil | 10150 | Vicosa           | 0.08 | 0.40 | 0.55 | 1342   | 740   | 460  |
| BRA | Brazil | 10151 | Vila Flor        | 0.08 | 0.40 | 0.55 | 2399   | 1324  | 823  |
| BRA | Brazil | 10152 | Agua Santa       | 0.50 | 0.75 | 0.92 | 1391   | 231   | 0    |
| BRA | Brazil | 10153 | Agudo            | 0.68 | 0.83 | 0.95 | 1962   | 0     | 0    |
| BRA | Brazil | 10154 | Ajuricaba        | 0.62 | 0.87 | 0.96 | 1308   | 0     | 0    |
| BRA | Brazil | 10155 | Alecrim          | 0.63 | 0.83 | 0.96 | 1158   | 0     | 0    |
| BRA | Brazil | 10156 | Alegrete         | 0.67 | 0.85 | 0.98 | 10223  | 0     | 0    |
| BRA | Brazil | 10157 | Alegria          | 0.68 | 0.83 | 0.93 | 464    | 0     | 0    |
| BRA | Brazil | 10158 | Alpestre         | 0.44 | 0.79 | 0.95 | 2696   | 40    | 0    |
| BRA | Brazil | 10159 | Alto Alegre      | 1.00 | 1.00 | 1.00 | 0      | 0     | 0    |
| BRA | Brazil | 10160 | Alto Feliz       | 0.64 | 0.80 | 0.93 | 570    | 17    | 0    |
| BRA | Brazil | 10161 | Alvorada         | 0.29 | 0.65 | 0.92 | 103399 | 30770 | 0    |
| BRA | Brazil | 10162 | Amaral Ferrador  | 0.17 | 0.51 | 0.69 | 4273   | 1977  | 771  |
| BRA | Brazil | 10163 | Ametista Do Sul  | 0.59 | 0.83 | 0.99 | 1443   | 0     | 0    |
| BRA | Brazil | 10164 | Andre Da Rocha   | 0.79 | 0.89 | 0.97 | 9      | 0     | 0    |
| BRA | Brazil | 10165 | Anta Gorda       | 0.44 | 0.69 | 0.90 | 2209   | 640   | 0    |
| BRA | Brazil | 10166 | Antonio Prado    | 0.87 | 0.92 | 0.96 | 0      | 0     | 0    |
| BRA | Brazil | 10167 | Arambare         | 0.17 | 0.51 | 0.69 | 2379   | 1084  | 400  |
| BRA | Brazil | 10168 | Ararica          | 0.32 | 0.66 | 0.93 | 3075   | 871   | 0    |
| BRA | Brazil | 10169 | Aratiba          | 0.66 | 0.80 | 0.90 | 878    | 2     | 0    |
| BRA | Brazil | 10170 | Arroio Do Meio   | 0.17 | 0.49 | 0.65 | 12848  | 6278  | 3065 |
| BRA | Brazil | 10171 | Arroio Do Sal    | 0.08 | 0.40 | 0.55 | 7372   | 4067  | 2528 |
| BRA | Brazil | 10172 | Arroio Do Tigre  | 0.17 | 0.49 | 0.65 | 8273   | 4042  | 1974 |
| BRA | Brazil | 10173 | Arroio Dos Ratos | 0.59 | 0.80 | 0.98 | 2927   | 15    | 0    |
| BRA | Brazil | 10174 | Arroio Grande    | 0.08 | 0.43 | 0.61 | 13509  | 6911  | 3516 |
| BRA | Brazil | 10175 | Arvorezinha      | 0.77 | 0.87 | 0.94 | 285    | 0     | 0    |
| BRA | Brazil | 10176 | Augusto Pestana  | 0.71 | 0.85 | 0.94 | 704    | 0     | 0    |



|     |        |       |                          |      |      |      |       |       |       |
|-----|--------|-------|--------------------------|------|------|------|-------|-------|-------|
| BRA | Brazil | 10177 | Aurea                    | 0.40 | 0.69 | 0.89 | 1452  | 394   | 0     |
| BRA | Brazil | 10178 | Bage                     | 0.17 | 0.50 | 0.66 | 79172 | 37799 | 17247 |
| BRA | Brazil | 10179 | Balneario Pinhal         | 0.08 | 0.41 | 0.58 | 9488  | 5073  | 2929  |
| BRA | Brazil | 10180 | Barao                    | 0.22 | 0.60 | 0.84 | 3460  | 1190  | 0     |
| BRA | Brazil | 10181 | Barao De Cotegipe        | 0.13 | 0.53 | 0.76 | 4941  | 1967  | 291   |
| BRA | Brazil | 10182 | Barao Do Triunfo         | 0.66 | 0.82 | 0.95 | 1054  | 0     | 0     |
| BRA | Brazil | 10183 | Barra Do Guarita         | 0.32 | 0.74 | 0.98 | 1568  | 200   | 0     |
| BRA | Brazil | 10184 | Barra Do Quarai          | 0.26 | 0.62 | 0.86 | 2284  | 772   | 0     |
| BRA | Brazil | 10185 | Barra Do Ribeiro         | 0.68 | 0.84 | 0.97 | 1601  | 0     | 0     |
| BRA | Brazil | 10186 | Barra Do Rio Azul        | 0.28 | 0.66 | 0.88 | 966   | 254   | 0     |
| BRA | Brazil | 10187 | Barra Funda              | 0.25 | 0.63 | 0.85 | 1404  | 427   | 0     |
| BRA | Brazil | 10188 | Barracao                 | 0.17 | 0.49 | 0.65 | 3462  | 1692  | 826   |
| BRA | Brazil | 10189 | Barros Cassal            | 0.87 | 0.91 | 0.94 | 0     | 0     | 0     |
| BRA | Brazil | 10190 | Benjamin Constant Do Sul | 0.32 | 0.76 | 0.96 | 1165  | 107   | 0     |
| BRA | Brazil | 10191 | Bento Goncalves          | 0.32 | 0.68 | 0.93 | 57206 | 14565 | 0     |
| BRA | Brazil | 10192 | Boa Vista Das Missoes    | 0.17 | 0.60 | 0.86 | 1315  | 419   | 0     |
| BRA | Brazil | 10193 | Boa Vista Do Burica      | 0.67 | 0.86 | 0.96 | 878   | 0     | 0     |
| BRA | Brazil | 10194 | Boa Vista Do Sul         | 0.83 | 0.88 | 0.92 | 0     | 0     | 0     |
| BRA | Brazil | 10195 | Bom Jesus                | 0.17 | 0.49 | 0.65 | 7409  | 3620  | 1768  |
| BRA | Brazil | 10196 | Bom Principio            | 0.50 | 0.75 | 0.94 | 4081  | 700   | 0     |
| BRA | Brazil | 10197 | Bom Progresso            | 0.46 | 0.80 | 0.97 | 727   | 0     | 0     |
| BRA | Brazil | 10198 | Bom Retiro Do Sul        | 0.44 | 0.71 | 0.92 | 4104  | 1077  | 0     |
| BRA | Brazil | 10199 | Boqueirao Do Leao        | 0.84 | 0.92 | 0.98 | 0     | 0     | 0     |
| BRA | Brazil | 10200 | Bossoroca                | 0.50 | 0.79 | 0.96 | 2023  | 87    | 0     |
| BRA | Brazil | 10201 | Braga                    | 0.45 | 0.79 | 0.98 | 1259  | 44    | 0     |
| BRA | Brazil | 10202 | Brochier                 | 0.31 | 0.64 | 0.89 | 2503  | 808   | 0     |
| BRA | Brazil | 10203 | Butia                    | 0.39 | 0.71 | 0.96 | 8598  | 1940  | 0     |
| BRA | Brazil | 10204 | Cacapava Do Sul          | 0.62 | 0.80 | 0.95 | 6169  | 0     | 0     |
| BRA | Brazil | 10205 | Cacequi                  | 0.59 | 0.79 | 0.96 | 2831  | 122   | 0     |
| BRA | Brazil | 10206 | Cachoeira Do Sul         | 0.77 | 0.88 | 0.96 | 2387  | 0     | 0     |
| BRA | Brazil | 10207 | Cachoeirinha             | 0.08 | 0.40 | 0.55 | 90815 | 50105 | 31137 |
| BRA | Brazil | 10208 | Cacique Doble            | 0.64 | 0.84 | 0.96 | 802   | 0     | 0     |
| BRA | Brazil | 10209 | Caibate                  | 0.87 | 0.93 | 0.96 | 0     | 0     | 0     |

|     |        |       |                     |      |      |      |        |       |      |
|-----|--------|-------|---------------------|------|------|------|--------|-------|------|
| BRA | Brazil | 10210 | Caicara             | 0.17 | 0.49 | 0.65 | 3151   | 1540  | 752  |
| BRA | Brazil | 10211 | Camaqua             | 0.19 | 0.55 | 0.75 | 39957  | 16179 | 3147 |
| BRA | Brazil | 10212 | Camargo             | 0.79 | 0.88 | 0.96 | 24     | 0     | 0    |
| BRA | Brazil | 10213 | Cambara Do Sul      | 0.43 | 0.68 | 0.88 | 2425   | 778   | 0    |
| BRA | Brazil | 10214 | Campestre Da Serra  | 0.90 | 0.93 | 0.96 | 0      | 0     | 0    |
| BRA | Brazil | 10215 | Campina Das Missoes | 0.56 | 0.79 | 0.94 | 1446   | 46    | 0    |
| BRA | Brazil | 10216 | Campinas Do Sul     | 0.30 | 0.64 | 0.87 | 3823   | 1192  | 0    |
| BRA | Brazil | 10217 | Campo Bom           | 0.37 | 0.69 | 0.92 | 29358  | 7714  | 0    |
| BRA | Brazil | 10218 | Campo Novo          | 0.48 | 0.81 | 0.97 | 1658   | 0     | 0    |
| BRA | Brazil | 10219 | Campos Borges       | 0.94 | 0.95 | 0.96 | 0      | 0     | 0    |
| BRA | Brazil | 10220 | Candelaria          | 0.68 | 0.83 | 0.96 | 3866   | 0     | 0    |
| BRA | Brazil | 10221 | Candido Godoi       | 0.17 | 0.49 | 0.65 | 4080   | 1994  | 973  |
| BRA | Brazil | 10222 | Candiota            | 0.24 | 0.62 | 0.86 | 4278   | 1358  | 0    |
| BRA | Brazil | 10223 | Canela              | 0.64 | 0.83 | 0.99 | 7249   | 0     | 0    |
| BRA | Brazil | 10224 | Cangucu             | 0.22 | 0.60 | 0.81 | 32673  | 11436 | 0    |
| BRA | Brazil | 10225 | Canoas              | 0.43 | 0.73 | 0.96 | 129945 | 24049 | 0    |
| BRA | Brazil | 10226 | Capao Da Canoa      | 0.08 | 0.43 | 0.61 | 35295  | 18041 | 9129 |
| BRA | Brazil | 10227 | Capao Do Leao       | 0.08 | 0.41 | 0.56 | 18508  | 10119 | 6142 |
| BRA | Brazil | 10228 | Capela De Santana   | 0.18 | 0.52 | 0.69 | 8601   | 3906  | 1524 |
| BRA | Brazil | 10229 | Capitao             | 0.45 | 0.71 | 0.92 | 948    | 254   | 0    |
| BRA | Brazil | 10230 | Capivari Do Sul     | 0.34 | 0.70 | 0.93 | 2132   | 471   | 0    |
| BRA | Brazil | 10231 | Caraa               | 0.10 | 0.45 | 0.63 | 5612   | 2794  | 1333 |
| BRA | Brazil | 10232 | Carazinho           | 0.13 | 0.55 | 0.79 | 42813  | 16273 | 760  |
| BRA | Brazil | 10233 | Carlos Barbosa      | 0.41 | 0.70 | 0.92 | 10905  | 2857  | 0    |
| BRA | Brazil | 10234 | Carlos Gomes        | 0.53 | 0.77 | 0.93 | 407    | 44    | 0    |
| BRA | Brazil | 10235 | Casca               | 0.82 | 0.87 | 0.92 | 0      | 0     | 0    |
| BRA | Brazil | 10236 | Caseiros            | 0.88 | 0.93 | 0.97 | 0      | 0     | 0    |
| BRA | Brazil | 10237 | Catuipe             | 0.59 | 0.86 | 0.96 | 1957   | 0     | 0    |
| BRA | Brazil | 10238 | Caxias Do Sul       | 0.52 | 0.77 | 0.97 | 137358 | 13296 | 0    |
| BRA | Brazil | 10239 | Centenario          | 0.35 | 0.81 | 0.98 | 1338   | 0     | 0    |
| BRA | Brazil | 10240 | Cerrito             | 0.08 | 0.40 | 0.55 | 4551   | 2511  | 1561 |
| BRA | Brazil | 10241 | Cerro Branco        | 0.69 | 0.83 | 0.95 | 520    | 0     | 0    |
| BRA | Brazil | 10242 | Cerro Grande        | 0.20 | 0.65 | 0.89 | 1470   | 368   | 0    |

|     |        |       |                         |      |      |      |       |      |      |
|-----|--------|-------|-------------------------|------|------|------|-------|------|------|
| BRA | Brazil | 10243 | Cerro Grande Do Sul     | 0.26 | 0.65 | 0.92 | 6288  | 1728 | 0    |
| BRA | Brazil | 10244 | Cerro Largo             | 0.58 | 0.85 | 0.96 | 3041  | 0    | 0    |
| BRA | Brazil | 10245 | Chapada                 | 0.23 | 0.63 | 0.86 | 5405  | 1600 | 0    |
| BRA | Brazil | 10246 | Charqueadas             | 0.64 | 0.81 | 0.96 | 6138  | 0    | 0    |
| BRA | Brazil | 10247 | Charrua                 | 0.43 | 0.81 | 0.97 | 1270  | 0    | 0    |
| BRA | Brazil | 10248 | Chiapeta                | 0.17 | 0.49 | 0.65 | 2509  | 1226 | 599  |
| BRA | Brazil | 10249 | Chui                    | 0.08 | 0.48 | 0.73 | 6896  | 3028 | 706  |
| BRA | Brazil | 10250 | Chувисса                | 0.17 | 0.49 | 0.65 | 3246  | 1586 | 774  |
| BRA | Brazil | 10251 | Cidreira                | 0.09 | 0.43 | 0.60 | 10547 | 5494 | 2965 |
| BRA | Brazil | 10252 | Ciriaco                 | 0.64 | 0.81 | 0.95 | 795   | 0    | 0    |
| BRA | Brazil | 10253 | Colinas                 | 0.17 | 0.49 | 0.65 | 1789  | 874  | 427  |
| BRA | Brazil | 10254 | Colorado                | 0.08 | 0.40 | 0.55 | 2465  | 1360 | 845  |
| BRA | Brazil | 10255 | Condor                  | 0.49 | 0.79 | 0.98 | 2111  | 52   | 0    |
| BRA | Brazil | 10256 | Constantina             | 0.21 | 0.67 | 0.90 | 6957  | 1578 | 0    |
| BRA | Brazil | 10257 | Coqueiros Do Sul        | 0.44 | 0.67 | 0.84 | 788   | 292  | 0    |
| BRA | Brazil | 10258 | Coronel Barros          | 0.91 | 0.93 | 0.95 | 0     | 0    | 0    |
| BRA | Brazil | 10259 | Coronel Bicaco          | 0.25 | 0.65 | 0.92 | 4208  | 1130 | 0    |
| BRA | Brazil | 10260 | Cotipora                | 0.75 | 0.84 | 0.91 | 224   | 0    | 0    |
| BRA | Brazil | 10261 | Coxilha                 | 0.13 | 0.50 | 0.70 | 1942  | 863  | 303  |
| BRA | Brazil | 10262 | Crissiumal              | 0.45 | 0.78 | 0.97 | 4923  | 232  | 0    |
| BRA | Brazil | 10263 | Cristal                 | 0.13 | 0.51 | 0.71 | 5234  | 2288 | 669  |
| BRA | Brazil | 10264 | Cristal Do Sul          | 0.28 | 0.63 | 0.87 | 1557  | 516  | 0    |
| BRA | Brazil | 10265 | Cruz Alta               | 0.81 | 0.92 | 0.98 | 0     | 0    | 0    |
| BRA | Brazil | 10266 | Cruzeiro Do Sul         | 0.17 | 0.49 | 0.65 | 8600  | 4202 | 2052 |
| BRA | Brazil | 10267 | David Canabarro         | 0.25 | 0.57 | 0.80 | 2630  | 1096 | 20   |
| BRA | Brazil | 10268 | Derrubadas              | 0.48 | 0.77 | 0.96 | 1043  | 88   | 0    |
| BRA | Brazil | 10269 | Dezesseis De Novembro   | 0.66 | 0.84 | 0.94 | 386   | 0    | 0    |
| BRA | Brazil | 10270 | Dilermando De Aguiar    | 0.81 | 0.89 | 0.96 | 0     | 0    | 0    |
| BRA | Brazil | 10271 | Dois Irmaos             | 0.33 | 0.68 | 0.91 | 15211 | 3933 | 0    |
| BRA | Brazil | 10272 | Dois Irmaos Das Missoes | 0.36 | 0.73 | 0.94 | 967   | 149  | 0    |
| BRA | Brazil | 10273 | Dois Lajeados           | 0.22 | 0.57 | 0.79 | 1863  | 734  | 36   |
| BRA | Brazil | 10274 | Dom Feliciano           | 0.17 | 0.49 | 0.65 | 9595  | 4688 | 2289 |
| BRA | Brazil | 10275 | Dom Pedrito             | 0.46 | 0.74 | 0.97 | 13550 | 2320 | 0    |

|     |        |       |                         |      |      |      |       |       |     |
|-----|--------|-------|-------------------------|------|------|------|-------|-------|-----|
| BRA | Brazil | 10276 | Dom Pedro De Alcantara  | 0.08 | 0.43 | 0.61 | 1879  | 972   | 505 |
| BRA | Brazil | 10277 | Dona Francisca          | 0.95 | 0.96 | 0.97 | 0     | 0     | 0   |
| BRA | Brazil | 10278 | Doutor Mauricio Cardoso | 0.65 | 0.82 | 0.94 | 740   | 0     | 0   |
| BRA | Brazil | 10279 | Doutor Ricardo          | 0.36 | 0.65 | 0.88 | 925   | 309   | 0   |
| BRA | Brazil | 10280 | Eldorado Do Sul         | 0.65 | 0.82 | 0.97 | 5902  | 0     | 0   |
| BRA | Brazil | 10281 | Encantado               | 0.43 | 0.71 | 0.93 | 8102  | 1927  | 0   |
| BRA | Brazil | 10282 | Encruzilhada Do Sul     | 0.66 | 0.81 | 0.93 | 3544  | 0     | 0   |
| BRA | Brazil | 10283 | Engenho Velho           | 0.29 | 0.78 | 0.98 | 729   | 22    | 0   |
| BRA | Brazil | 10284 | Entre Rios Do Sul       | 0.38 | 0.67 | 0.89 | 1248  | 382   | 0   |
| BRA | Brazil | 10285 | Entre-ijuis             | 0.35 | 0.75 | 0.97 | 4114  | 468   | 0   |
| BRA | Brazil | 10286 | Erebango                | 0.35 | 0.71 | 0.93 | 1392  | 284   | 0   |
| BRA | Brazil | 10287 | Erechim                 | 0.15 | 0.59 | 0.85 | 69038 | 22029 | 0   |
| BRA | Brazil | 10288 | Ernestina               | 0.17 | 0.49 | 0.65 | 2649  | 1294  | 632 |
| BRA | Brazil | 10289 | Erval Grande            | 0.40 | 0.70 | 0.89 | 2061  | 510   | 0   |
| BRA | Brazil | 10290 | Erval Seco              | 0.23 | 0.59 | 0.81 | 4341  | 1628  | 0   |
| BRA | Brazil | 10291 | Esmeralda               | 0.90 | 0.94 | 0.97 | 0     | 0     | 0   |
| BRA | Brazil | 10292 | Esperanca Do Sul        | 0.37 | 0.79 | 0.98 | 1341  | 40    | 0   |
| BRA | Brazil | 10293 | Espumoso                | 0.88 | 0.92 | 0.96 | 0     | 0     | 0   |
| BRA | Brazil | 10294 | Estacao                 | 0.24 | 0.65 | 0.88 | 3655  | 1003  | 0   |
| BRA | Brazil | 10295 | Estancia Velha          | 0.33 | 0.68 | 0.94 | 23673 | 5766  | 0   |
| BRA | Brazil | 10296 | Esteio                  | 0.40 | 0.71 | 0.94 | 30418 | 6798  | 0   |
| BRA | Brazil | 10297 | Estrela                 | 0.60 | 0.80 | 0.95 | 6873  | 0     | 0   |
| BRA | Brazil | 10298 | Estrela Velha           | 0.94 | 0.95 | 0.96 | 0     | 0     | 0   |
| BRA | Brazil | 10299 | Eugenio De Castro       | 0.84 | 0.91 | 0.96 | 0     | 0     | 0   |
| BRA | Brazil | 10300 | Fagundes Varela         | 0.75 | 0.85 | 0.95 | 145   | 0     | 0   |
| BRA | Brazil | 10301 | Farroupilha             | 0.62 | 0.81 | 0.96 | 13651 | 0     | 0   |
| BRA | Brazil | 10302 | Faxinal Do Soturno      | 0.91 | 0.93 | 0.95 | 0     | 0     | 0   |
| BRA | Brazil | 10303 | Faxinalzinho            | 0.17 | 0.61 | 0.84 | 1433  | 442   | 0   |
| BRA | Brazil | 10304 | Fazenda Vilanova        | 0.39 | 0.69 | 0.93 | 1825  | 485   | 0   |
| BRA | Brazil | 10305 | Feliz                   | 0.55 | 0.77 | 0.94 | 3278  | 397   | 0   |
| BRA | Brazil | 10306 | Flores Da Cunha         | 0.65 | 0.82 | 0.96 | 4757  | 0     | 0   |
| BRA | Brazil | 10307 | Floriano Peixoto        | 0.45 | 0.71 | 0.91 | 660   | 180   | 0   |
| BRA | Brazil | 10308 | Fontoura Xavier         | 0.78 | 0.88 | 0.97 | 210   | 0     | 0   |

|     |        |       |                       |      |      |      |        |       |      |
|-----|--------|-------|-----------------------|------|------|------|--------|-------|------|
| BRA | Brazil | 10309 | Formigueiro           | 0.69 | 0.85 | 0.97 | 744    | 0     | 0    |
| BRA | Brazil | 10310 | Fortaleza Dos Valos   | 0.77 | 0.89 | 0.96 | 132    | 0     | 0    |
| BRA | Brazil | 10311 | Frederico Westphalen  | 0.37 | 0.77 | 0.98 | 13112  | 936   | 0    |
| BRA | Brazil | 10312 | Garibaldi             | 0.60 | 0.78 | 0.93 | 7295   | 599   | 0    |
| BRA | Brazil | 10313 | Garruchos             | 0.56 | 0.82 | 0.97 | 785    | 0     | 0    |
| BRA | Brazil | 10314 | Gaurama               | 0.13 | 0.54 | 0.76 | 3839   | 1520  | 209  |
| BRA | Brazil | 10315 | General Camara        | 0.62 | 0.80 | 0.93 | 1632   | 40    | 0    |
| BRA | Brazil | 10316 | Gentil                | 0.72 | 0.84 | 0.94 | 141    | 0     | 0    |
| BRA | Brazil | 10317 | Getulio Vargas        | 0.20 | 0.62 | 0.86 | 9532   | 2861  | 0    |
| BRA | Brazil | 10318 | Girua                 | 0.56 | 0.82 | 0.94 | 4051   | 0     | 0    |
| BRA | Brazil | 10319 | Glorinha              | 0.34 | 0.67 | 0.91 | 3557   | 1017  | 0    |
| BRA | Brazil | 10320 | Gramado               | 0.84 | 0.90 | 0.97 | 0      | 0     | 0    |
| BRA | Brazil | 10321 | Gramado Dos Loureiros | 0.58 | 0.84 | 0.97 | 463    | 0     | 0    |
| BRA | Brazil | 10322 | Gramado Xavier        | 0.81 | 0.90 | 0.97 | 0      | 0     | 0    |
| BRA | Brazil | 10323 | Gravatani             | 0.26 | 0.62 | 0.87 | 149814 | 48708 | 0    |
| BRA | Brazil | 10324 | Guabiju               | 0.91 | 0.93 | 0.94 | 0      | 0     | 0    |
| BRA | Brazil | 10325 | Guaiba                | 0.78 | 0.88 | 0.97 | 2180   | 0     | 0    |
| BRA | Brazil | 10326 | Guapore               | 0.57 | 0.78 | 0.95 | 5906   | 404   | 0    |
| BRA | Brazil | 10327 | Guarani Das Missoes   | 0.64 | 0.87 | 0.96 | 1258   | 0     | 0    |
| BRA | Brazil | 10328 | Harmonia              | 0.25 | 0.63 | 0.87 | 2717   | 842   | 0    |
| BRA | Brazil | 10329 | Herval                | 0.17 | 0.50 | 0.67 | 5122   | 2443  | 1092 |
| BRA | Brazil | 10330 | Herveiras             | 0.93 | 0.96 | 0.98 | 0      | 0     | 0    |
| BRA | Brazil | 10331 | Horizontalina         | 0.17 | 0.49 | 0.65 | 12081  | 5903  | 2882 |
| BRA | Brazil | 10332 | Hulha Negra           | 0.19 | 0.53 | 0.72 | 5124   | 2213  | 632  |
| BRA | Brazil | 10333 | Humaita               | 0.17 | 0.49 | 0.65 | 3139   | 1534  | 749  |
| BRA | Brazil | 10334 | Ibarama               | 0.72 | 0.85 | 0.97 | 373    | 0     | 0    |
| BRA | Brazil | 10335 | Ibiaca                | 0.66 | 0.80 | 0.90 | 754    | 26    | 0    |
| BRA | Brazil | 10336 | Ibiraaras             | 0.93 | 0.95 | 0.97 | 0      | 0     | 0    |
| BRA | Brazil | 10337 | Ibirapuita            | 0.67 | 0.78 | 0.88 | 707    | 105   | 0    |
| BRA | Brazil | 10338 | Ibiruba               | 0.76 | 0.88 | 0.97 | 842    | 0     | 0    |
| BRA | Brazil | 10339 | Igrejinha             | 0.29 | 0.66 | 0.91 | 19219  | 5259  | 0    |
| BRA | Brazil | 10340 | Ijuui                 | 0.59 | 0.84 | 0.97 | 17427  | 0     | 0    |
| BRA | Brazil | 10341 | Ilopolis              | 0.17 | 0.49 | 0.65 | 2590   | 1265  | 618  |

|     |        |       |                       |      |      |      |       |      |      |
|-----|--------|-------|-----------------------|------|------|------|-------|------|------|
| BRA | Brazil | 10342 | Imbe                  | 0.08 | 0.43 | 0.61 | 15875 | 8173 | 4229 |
| BRA | Brazil | 10343 | Imigrante             | 0.18 | 0.51 | 0.67 | 2657  | 1244 | 549  |
| BRA | Brazil | 10344 | Independencia         | 0.17 | 0.49 | 0.65 | 4125  | 2016 | 984  |
| BRA | Brazil | 10345 | Inhacora              | 0.66 | 0.85 | 0.97 | 318   | 0    | 0    |
| BRA | Brazil | 10346 | Ipe                   | 0.92 | 0.94 | 0.96 | 0     | 0    | 0    |
| BRA | Brazil | 10347 | Ipiranga Do Sul       | 0.50 | 0.72 | 0.88 | 586   | 156  | 0    |
| BRA | Brazil | 10348 | Irai                  | 0.37 | 0.78 | 0.99 | 3534  | 190  | 0    |
| BRA | Brazil | 10349 | Itaara                | 0.85 | 0.92 | 0.97 | 0     | 0    | 0    |
| BRA | Brazil | 10350 | Itacurubi             | 0.31 | 0.72 | 0.96 | 1728  | 268  | 0    |
| BRA | Brazil | 10351 | Itapuca               | 0.85 | 0.91 | 0.95 | 0     | 0    | 0    |
| BRA | Brazil | 10352 | Itaqui                | 0.58 | 0.80 | 0.96 | 8284  | 159  | 0    |
| BRA | Brazil | 10353 | Itatiba Do Sul        | 0.36 | 0.67 | 0.90 | 1708  | 520  | 0    |
| BRA | Brazil | 10354 | Ivora                 | 0.91 | 0.93 | 0.95 | 0     | 0    | 0    |
| BRA | Brazil | 10355 | Ivoti                 | 0.56 | 0.79 | 0.94 | 5351  | 286  | 0    |
| BRA | Brazil | 10356 | Jaboticaba            | 0.50 | 0.79 | 0.97 | 1198  | 51   | 0    |
| BRA | Brazil | 10357 | Jacutinga             | 0.08 | 0.40 | 0.55 | 3093  | 1706 | 1060 |
| BRA | Brazil | 10358 | Jaguarao              | 0.08 | 0.45 | 0.66 | 20301 | 9798 | 3971 |
| BRA | Brazil | 10359 | Jaguari               | 0.30 | 0.67 | 0.92 | 5700  | 1475 | 0    |
| BRA | Brazil | 10360 | Jaquirana             | 0.87 | 0.93 | 0.99 | 0     | 0    | 0    |
| BRA | Brazil | 10361 | Jari                  | 0.27 | 0.66 | 0.91 | 1984  | 524  | 0    |
| BRA | Brazil | 10362 | Joia                  | 0.77 | 0.90 | 0.97 | 218   | 0    | 0    |
| BRA | Brazil | 10363 | Julio De Castilhos    | 0.69 | 0.90 | 0.98 | 2213  | 0    | 0    |
| BRA | Brazil | 10364 | Lagoa Dos Tres Cantos | 0.58 | 0.76 | 0.90 | 367   | 70   | 0    |
| BRA | Brazil | 10365 | Lagoa Vermelha        | 0.67 | 0.83 | 0.97 | 3902  | 0    | 0    |
| BRA | Brazil | 10366 | Lagoao                | 0.89 | 0.93 | 0.97 | 0     | 0    | 0    |
| BRA | Brazil | 10367 | Lajeado               | 0.54 | 0.79 | 0.97 | 20955 | 994  | 0    |
| BRA | Brazil | 10368 | Lajeado Do Bugre      | 0.18 | 0.60 | 0.86 | 1651  | 546  | 0    |
| BRA | Brazil | 10369 | Lavras Do Sul         | 0.60 | 0.79 | 0.95 | 1575  | 42   | 0    |
| BRA | Brazil | 10370 | Liberato Salzano      | 0.22 | 0.61 | 0.85 | 3247  | 1067 | 0    |
| BRA | Brazil | 10371 | Lindolfo Collor       | 0.57 | 0.80 | 0.97 | 1311  | 0    | 0    |
| BRA | Brazil | 10372 | Linha Nova            | 0.60 | 0.79 | 0.93 | 360   | 26   | 0    |
| BRA | Brazil | 10373 | Macambara             | 0.17 | 0.49 | 0.65 | 2830  | 1383 | 675  |
| BRA | Brazil | 10374 | Machadinho            | 0.80 | 0.90 | 0.98 | 0     | 0    | 0    |

|     |        |       |                         |      |      |      |       |       |      |
|-----|--------|-------|-------------------------|------|------|------|-------|-------|------|
| BRA | Brazil | 10375 | Mampituba               | 0.08 | 0.43 | 0.61 | 2231  | 1142  | 588  |
| BRA | Brazil | 10376 | Manoel Viana            | 0.72 | 0.86 | 0.97 | 591   | 0     | 0    |
| BRA | Brazil | 10377 | Maquine                 | 0.16 | 0.51 | 0.73 | 4468  | 1997  | 489  |
| BRA | Brazil | 10378 | Marata                  | 0.35 | 0.66 | 0.89 | 1314  | 410   | 0    |
| BRA | Brazil | 10379 | Marau                   | 0.17 | 0.49 | 0.65 | 26596 | 12996 | 6345 |
| BRA | Brazil | 10380 | Marcelino Ramos         | 0.21 | 0.61 | 0.86 | 2785  | 901   | 0    |
| BRA | Brazil | 10381 | Mariana Pimentel        | 0.74 | 0.85 | 0.94 | 220   | 0     | 0    |
| BRA | Brazil | 10382 | Mariano Moro            | 0.37 | 0.65 | 0.84 | 949   | 325   | 0    |
| BRA | Brazil | 10383 | Marques De Souza        | 0.80 | 0.86 | 0.91 | 7     | 0     | 0    |
| BRA | Brazil | 10384 | Mata                    | 0.39 | 0.73 | 0.95 | 2039  | 331   | 0    |
| BRA | Brazil | 10385 | Mato Castelhana         | 0.28 | 0.60 | 0.82 | 1344  | 516   | 0    |
| BRA | Brazil | 10386 | Mato Leitao             | 0.74 | 0.86 | 0.96 | 247   | 0     | 0    |
| BRA | Brazil | 10387 | Maximiliano De Almeida  | 0.33 | 0.69 | 0.92 | 2269  | 525   | 0    |
| BRA | Brazil | 10388 | Minas Do Leao           | 0.65 | 0.82 | 0.97 | 1210  | 0     | 0    |
| BRA | Brazil | 10389 | Miraguai                | 0.81 | 0.92 | 0.98 | 0     | 0     | 0    |
| BRA | Brazil | 10390 | Montauri                | 0.92 | 0.93 | 0.94 | 0     | 0     | 0    |
| BRA | Brazil | 10391 | Monte Alegre Dos Campos | 0.82 | 0.91 | 0.98 | 0     | 0     | 0    |
| BRA | Brazil | 10392 | Monte Belo Do Sul       | 0.64 | 0.79 | 0.91 | 426   | 28    | 0    |
| BRA | Brazil | 10393 | Montenegro              | 0.48 | 0.74 | 0.95 | 20998 | 3799  | 0    |
| BRA | Brazil | 10394 | Mormaco                 | 0.17 | 0.49 | 0.65 | 1865  | 911   | 445  |
| BRA | Brazil | 10395 | Morrinhos Do Sul        | 0.08 | 0.40 | 0.55 | 2287  | 1262  | 784  |
| BRA | Brazil | 10396 | Morro Redondo           | 0.08 | 0.41 | 0.58 | 4721  | 2528  | 1460 |
| BRA | Brazil | 10397 | Morro Reuter            | 0.17 | 0.49 | 0.65 | 3847  | 1880  | 918  |
| BRA | Brazil | 10398 | Mostardas               | 0.08 | 0.43 | 0.61 | 9141  | 4667  | 2364 |
| BRA | Brazil | 10399 | Mucum                   | 0.43 | 0.71 | 0.94 | 1446  | 360   | 0    |
| BRA | Brazil | 10400 | Muitos Capoes           | 0.97 | 0.98 | 0.99 | 0     | 0     | 0    |
| BRA | Brazil | 10401 | Muliterno               | 0.76 | 0.88 | 0.98 | 70    | 0     | 0    |
| BRA | Brazil | 10402 | Nao-me-toque            | 0.33 | 0.67 | 0.91 | 8062  | 2284  | 0    |
| BRA | Brazil | 10403 | Nicolau Vergueiro       | 0.28 | 0.64 | 0.90 | 892   | 267   | 0    |
| BRA | Brazil | 10404 | Nonoai                  | 0.24 | 0.66 | 0.90 | 6834  | 1651  | 0    |
| BRA | Brazil | 10405 | Nova Alvorada           | 0.92 | 0.94 | 0.96 | 0     | 0     | 0    |
| BRA | Brazil | 10406 | Nova Araca              | 0.26 | 0.61 | 0.80 | 1570  | 556   | 11   |
| BRA | Brazil | 10407 | Nova Bassano            | 0.63 | 0.79 | 0.94 | 1966  | 69    | 0    |

|     |        |       |                       |      |      |      |        |       |      |
|-----|--------|-------|-----------------------|------|------|------|--------|-------|------|
| BRA | Brazil | 10408 | Nova Boa Vista        | 0.24 | 0.68 | 0.88 | 1116   | 229   | 0    |
| BRA | Brazil | 10409 | Nova Brescia          | 0.40 | 0.66 | 0.87 | 1893   | 658   | 0    |
| BRA | Brazil | 10410 | Nova Candelaria       | 0.68 | 0.84 | 0.95 | 330    | 0     | 0    |
| BRA | Brazil | 10411 | Nova Esperanca Do Sul | 0.31 | 0.70 | 0.94 | 2541   | 545   | 0    |
| BRA | Brazil | 10412 | Nova Hartz            | 0.26 | 0.64 | 0.90 | 10803  | 3306  | 0    |
| BRA | Brazil | 10413 | Nova Padua            | 0.76 | 0.85 | 0.93 | 98     | 0     | 0    |
| BRA | Brazil | 10414 | Nova Palma            | 0.92 | 0.95 | 0.98 | 0      | 0     | 0    |
| BRA | Brazil | 10415 | Nova Petropolis       | 0.58 | 0.78 | 0.94 | 4601   | 369   | 0    |
| BRA | Brazil | 10416 | Nova Prata            | 0.72 | 0.85 | 0.95 | 2090   | 0     | 0    |
| BRA | Brazil | 10417 | Nova Ramada           | 0.54 | 0.83 | 0.95 | 617    | 0     | 0    |
| BRA | Brazil | 10418 | Nova Roma Do Sul      | 0.76 | 0.87 | 0.95 | 162    | 0     | 0    |
| BRA | Brazil | 10419 | Nova Santa Rita       | 0.49 | 0.77 | 0.98 | 8668   | 939   | 0    |
| BRA | Brazil | 10420 | Novo Barreiro         | 0.31 | 0.64 | 0.89 | 2041   | 653   | 0    |
| BRA | Brazil | 10421 | Novo Cabrais          | 0.65 | 0.82 | 0.95 | 623    | 0     | 0    |
| BRA | Brazil | 10422 | Novo Hamburgo         | 0.32 | 0.64 | 0.87 | 114086 | 38117 | 0    |
| BRA | Brazil | 10423 | Novo Machado          | 0.74 | 0.85 | 0.94 | 231    | 0     | 0    |
| BRA | Brazil | 10424 | Novo Tiradentes       | 0.27 | 0.61 | 0.84 | 1179   | 419   | 0    |
| BRA | Brazil | 10425 | Osorio                | 0.18 | 0.54 | 0.77 | 29026  | 12217 | 1411 |
| BRA | Brazil | 10426 | Paim Filho            | 0.17 | 0.49 | 0.65 | 2570   | 1256  | 613  |
| BRA | Brazil | 10427 | Palmares Do Sul       | 0.18 | 0.53 | 0.73 | 7492   | 3266  | 880  |
| BRA | Brazil | 10428 | Palmeira Das Missoes  | 0.24 | 0.67 | 0.92 | 20529  | 4769  | 0    |
| BRA | Brazil | 10429 | Palmitinho            | 0.50 | 0.78 | 0.97 | 2144   | 126   | 0    |
| BRA | Brazil | 10430 | Panambi               | 0.61 | 0.82 | 0.98 | 8138   | 0     | 0    |
| BRA | Brazil | 10431 | Pantano Grande        | 0.88 | 0.94 | 0.98 | 0      | 0     | 0    |
| BRA | Brazil | 10432 | Parai                 | 0.79 | 0.88 | 0.96 | 86     | 0     | 0    |
| BRA | Brazil | 10433 | Paraiso Do Sul        | 0.57 | 0.78 | 0.93 | 1778   | 194   | 0    |
| BRA | Brazil | 10434 | Pareci Novo           | 0.26 | 0.63 | 0.89 | 2379   | 743   | 0    |
| BRA | Brazil | 10435 | Parobe                | 0.28 | 0.65 | 0.91 | 29766  | 8797  | 0    |
| BRA | Brazil | 10436 | Passa Sete            | 0.63 | 0.81 | 0.95 | 922    | 0     | 0    |
| BRA | Brazil | 10437 | Passo Do Sobrado      | 0.60 | 0.77 | 0.92 | 1433   | 194   | 0    |
| BRA | Brazil | 10438 | Passo Fundo           | 0.13 | 0.52 | 0.76 | 133432 | 55401 | 8162 |
| BRA | Brazil | 10439 | Paverama              | 0.17 | 0.49 | 0.65 | 5827   | 2847  | 1390 |
| BRA | Brazil | 10440 | Pedro Osorio          | 0.17 | 0.50 | 0.66 | 4966   | 2373  | 1066 |



|     |        |       |                     |      |      |      |        |        |       |
|-----|--------|-------|---------------------|------|------|------|--------|--------|-------|
| BRA | Brazil | 10441 | Pejuicara           | 0.17 | 0.49 | 0.65 | 2543   | 1243   | 607   |
| BRA | Brazil | 10442 | Pelotas             | 0.08 | 0.46 | 0.67 | 246700 | 116626 | 43418 |
| BRA | Brazil | 10443 | Picada Cafe         | 0.68 | 0.83 | 0.94 | 663    | 0      | 0     |
| BRA | Brazil | 10444 | Pinhal              | 0.29 | 0.63 | 0.87 | 1356   | 449    | 0     |
| BRA | Brazil | 10445 | Pinhal Grande       | 0.89 | 0.94 | 0.96 | 0      | 0      | 0     |
| BRA | Brazil | 10446 | Pinheirinho Do Vale | 0.37 | 0.72 | 0.95 | 2290   | 400    | 0     |
| BRA | Brazil | 10447 | Pinheiro Machado    | 0.32 | 0.67 | 0.94 | 6514   | 1777   | 0     |
| BRA | Brazil | 10448 | Pirapo              | 0.76 | 0.88 | 0.96 | 112    | 0      | 0     |
| BRA | Brazil | 10449 | Piratini            | 0.59 | 0.78 | 0.94 | 4413   | 359    | 0     |
| BRA | Brazil | 10450 | Planalto            | 0.17 | 0.49 | 0.65 | 6644   | 3246   | 1585  |
| BRA | Brazil | 10451 | Poco Das Antas      | 0.46 | 0.72 | 0.93 | 688    | 170    | 0     |
| BRA | Brazil | 10452 | Pontao              | 0.14 | 0.60 | 0.85 | 2743   | 846    | 0     |
| BRA | Brazil | 10453 | Ponte Preta         | 0.38 | 0.66 | 0.85 | 799    | 273    | 0     |
| BRA | Brazil | 10454 | Portao              | 0.29 | 0.64 | 0.89 | 18813  | 6056   | 0     |
| BRA | Brazil | 10455 | Porto Alegre        | 0.42 | 0.72 | 0.93 | 565091 | 114088 | 0     |
| BRA | Brazil | 10456 | Porto Lucena        | 0.53 | 0.80 | 0.95 | 1357   | 15     | 0     |
| BRA | Brazil | 10457 | Porto Maua          | 0.62 | 0.83 | 0.96 | 455    | 0      | 0     |
| BRA | Brazil | 10458 | Porto Vera Cruz     | 0.48 | 0.76 | 0.94 | 543    | 65     | 0     |
| BRA | Brazil | 10459 | Porto Xavier        | 0.38 | 0.81 | 0.98 | 4338   | 0      | 0     |
| BRA | Brazil | 10460 | Pouso Novo          | 0.47 | 0.70 | 0.89 | 607    | 183    | 0     |
| BRA | Brazil | 10461 | Presidente Lucena   | 0.46 | 0.72 | 0.92 | 999    | 238    | 0     |
| BRA | Brazil | 10462 | Progresso           | 0.71 | 0.82 | 0.92 | 664    | 0      | 0     |
| BRA | Brazil | 10463 | Protasio Alves      | 0.23 | 0.56 | 0.74 | 1147   | 474    | 128   |
| BRA | Brazil | 10464 | Putinga             | 0.35 | 0.65 | 0.89 | 1863   | 612    | 0     |
| BRA | Brazil | 10465 | Quarai              | 0.27 | 0.63 | 0.88 | 13645  | 4261   | 0     |
| BRA | Brazil | 10466 | Quevedos            | 0.59 | 0.81 | 0.96 | 595    | 0      | 0     |
| BRA | Brazil | 10467 | Quinze De Novembro  | 0.91 | 0.94 | 0.98 | 0      | 0      | 0     |
| BRA | Brazil | 10468 | Redentora           | 0.25 | 0.70 | 0.97 | 6413   | 1182   | 0     |
| BRA | Brazil | 10469 | Relvado             | 0.38 | 0.66 | 0.88 | 935    | 321    | 0     |
| BRA | Brazil | 10470 | Restinga Seca       | 0.52 | 0.75 | 0.93 | 4474   | 816    | 0     |
| BRA | Brazil | 10471 | Rio Dos Indios      | 0.08 | 0.40 | 0.55 | 2408   | 1328   | 825   |
| BRA | Brazil | 10472 | Rio Grande          | 0.08 | 0.53 | 0.74 | 146376 | 54817  | 13112 |
| BRA | Brazil | 10473 | Rio Pardo           | 0.71 | 0.84 | 0.95 | 3673   | 0      | 0     |

|     |        |       |                           |      |      |      |        |       |       |
|-----|--------|-------|---------------------------|------|------|------|--------|-------|-------|
| BRA | Brazil | 10474 | Riozinho                  | 0.35 | 0.64 | 0.87 | 2044   | 709   | 0     |
| BRA | Brazil | 10475 | Roca Sales                | 0.34 | 0.64 | 0.87 | 5892   | 2088  | 0     |
| BRA | Brazil | 10476 | Rodeio Bonito             | 0.24 | 0.63 | 0.88 | 3341   | 1016  | 0     |
| BRA | Brazil | 10477 | Rolante                   | 0.26 | 0.65 | 0.90 | 10643  | 3052  | 0     |
| BRA | Brazil | 10478 | Ronda Alta                | 0.21 | 0.67 | 0.91 | 6246   | 1346  | 0     |
| BRA | Brazil | 10479 | Rondinha                  | 0.42 | 0.73 | 0.90 | 2085   | 395   | 0     |
| BRA | Brazil | 10480 | Roque Gonzales            | 0.62 | 0.85 | 0.96 | 1340   | 0     | 0     |
| BRA | Brazil | 10481 | Rosario Do Sul            | 0.33 | 0.66 | 0.91 | 18895  | 5733  | 0     |
| BRA | Brazil | 10482 | Sagrada Familia           | 0.54 | 0.77 | 0.93 | 681    | 89    | 0     |
| BRA | Brazil | 10483 | Saldanha Maranhão         | 0.54 | 0.78 | 0.95 | 722    | 60    | 0     |
| BRA | Brazil | 10484 | Salto Do Jacui            | 0.79 | 0.90 | 0.98 | 191    | 0     | 0     |
| BRA | Brazil | 10485 | Salvador Das Missoes      | 0.53 | 0.80 | 0.93 | 774    | 2     | 0     |
| BRA | Brazil | 10486 | Salvador Do Sul           | 0.51 | 0.76 | 0.95 | 2473   | 303   | 0     |
| BRA | Brazil | 10487 | Sananduva                 | 0.74 | 0.85 | 0.94 | 1037   | 0     | 0     |
| BRA | Brazil | 10488 | Santa Barbara Do Sul      | 0.90 | 0.94 | 0.98 | 0      | 0     | 0     |
| BRA | Brazil | 10489 | Santa Clara Do Sul        | 0.51 | 0.75 | 0.94 | 1909   | 327   | 0     |
| BRA | Brazil | 10490 | Santa Cruz Do Sul         | 0.85 | 0.91 | 0.97 | 0      | 0     | 0     |
| BRA | Brazil | 10491 | Santa Maria               | 0.17 | 0.49 | 0.65 | 175769 | 85888 | 41934 |
| BRA | Brazil | 10492 | Santa Maria Do Herval     | 0.75 | 0.83 | 0.90 | 332    | 0     | 0     |
| BRA | Brazil | 10493 | Santa Rosa                | 0.48 | 0.83 | 0.98 | 23408  | 0     | 0     |
| BRA | Brazil | 10494 | Santa Tereza              | 0.17 | 0.49 | 0.65 | 1142   | 558   | 272   |
| BRA | Brazil | 10495 | Santa Vitoria Do Palmar   | 0.08 | 0.41 | 0.57 | 22331  | 12050 | 7077  |
| BRA | Brazil | 10496 | Santana Da Boa Vista      | 0.67 | 0.82 | 0.94 | 1109   | 0     | 0     |
| BRA | Brazil | 10497 | Santana Do Livramento     | 0.24 | 0.63 | 0.87 | 49368  | 14986 | 0     |
| BRA | Brazil | 10498 | Santiago                  | 0.38 | 0.72 | 0.94 | 22348  | 4051  | 0     |
| BRA | Brazil | 10499 | Santo Angelo              | 0.62 | 0.88 | 0.98 | 14112  | 0     | 0     |
| BRA | Brazil | 10500 | Santo Antonio Da Patrulha | 0.19 | 0.54 | 0.72 | 26547  | 11356 | 3347  |
| BRA | Brazil | 10501 | Santo Antonio Das Missoes | 0.44 | 0.80 | 0.99 | 3861   | 47    | 0     |
| BRA | Brazil | 10502 | Santo Antonio Do Palma    | 0.72 | 0.84 | 0.92 | 179    | 0     | 0     |
| BRA | Brazil | 10503 | Santo Antonio Do Planalto | 0.54 | 0.75 | 0.92 | 539    | 93    | 0     |
| BRA | Brazil | 10504 | Santo Augusto             | 0.57 | 0.78 | 0.93 | 3195   | 279   | 0     |
| BRA | Brazil | 10505 | Santo Cristo              | 0.38 | 0.79 | 0.96 | 6097   | 175   | 0     |
| BRA | Brazil | 10506 | Santo Expedito Do Sul     | 0.21 | 0.57 | 0.77 | 1453   | 571   | 70    |

|     |        |       |                        |      |      |      |        |       |      |
|-----|--------|-------|------------------------|------|------|------|--------|-------|------|
| BRA | Brazil | 10507 | Sao Borja              | 0.34 | 0.77 | 0.99 | 28317  | 2018  | 0    |
| BRA | Brazil | 10508 | Sao Domingos Do Sul    | 0.85 | 0.90 | 0.94 | 0      | 0     | 0    |
| BRA | Brazil | 10509 | Sao Francisco De Assis | 0.35 | 0.72 | 0.97 | 8547   | 1501  | 0    |
| BRA | Brazil | 10510 | Sao Francisco De Paula | 0.17 | 0.49 | 0.65 | 13735  | 6712  | 3277 |
| BRA | Brazil | 10511 | Sao Gabriel            | 0.17 | 0.50 | 0.67 | 40957  | 19486 | 8691 |
| BRA | Brazil | 10512 | Sao Jeronimo           | 0.45 | 0.72 | 0.95 | 9224   | 2040  | 0    |
| BRA | Brazil | 10513 | Sao Joao Da Urtiga     | 0.70 | 0.84 | 0.95 | 491    | 0     | 0    |
| BRA | Brazil | 10514 | Sao Joao Do Polesine   | 0.94 | 0.95 | 0.96 | 0      | 0     | 0    |
| BRA | Brazil | 10515 | Sao Jorge              | 0.92 | 0.94 | 0.96 | 0      | 0     | 0    |
| BRA | Brazil | 10516 | Sao Jose Das Missoes   | 0.23 | 0.68 | 0.91 | 1506   | 309   | 0    |
| BRA | Brazil | 10517 | Sao Jose Do Herval     | 0.32 | 0.64 | 0.88 | 1018   | 349   | 0    |
| BRA | Brazil | 10518 | Sao Jose Do Hortencio  | 0.59 | 0.79 | 0.94 | 962    | 61    | 0    |
| BRA | Brazil | 10519 | Sao Jose Do Inhacora   | 0.17 | 0.49 | 0.65 | 1365   | 667   | 326  |
| BRA | Brazil | 10520 | Sao Jose Do Norte      | 0.08 | 0.45 | 0.66 | 15762  | 7653  | 3143 |
| BRA | Brazil | 10521 | Sao Jose Do Ouro       | 0.85 | 0.91 | 0.95 | 0      | 0     | 0    |
| BRA | Brazil | 10522 | Sao Jose Dos Ausentes  | 0.90 | 0.94 | 0.98 | 0      | 0     | 0    |
| BRA | Brazil | 10523 | Sao Leopoldo           | 0.26 | 0.64 | 0.91 | 127530 | 37236 | 0    |
| BRA | Brazil | 10524 | Sao Lourenco Do Sul    | 0.11 | 0.52 | 0.74 | 30219  | 12374 | 2770 |
| BRA | Brazil | 10525 | Sao Luiz Gonzaga       | 0.38 | 0.77 | 0.98 | 15619  | 953   | 0    |
| BRA | Brazil | 10526 | Sao Marcos             | 0.68 | 0.84 | 0.97 | 2570   | 0     | 0    |
| BRA | Brazil | 10527 | Sao Martinho           | 0.53 | 0.81 | 0.96 | 1517   | 0     | 0    |
| BRA | Brazil | 10528 | Sao Martinho Da Serra  | 0.88 | 0.92 | 0.95 | 0      | 0     | 0    |
| BRA | Brazil | 10529 | Sao Miguel Das Missoes | 0.61 | 0.87 | 0.97 | 1474   | 0     | 0    |
| BRA | Brazil | 10530 | Sao Nicolau            | 0.50 | 0.82 | 0.98 | 1712   | 0     | 0    |
| BRA | Brazil | 10531 | Sao Paulo Das Missoes  | 0.69 | 0.84 | 0.95 | 684    | 0     | 0    |
| BRA | Brazil | 10532 | Sao Pedro Da Serra     | 0.47 | 0.76 | 0.96 | 1178   | 129   | 0    |
| BRA | Brazil | 10533 | Sao Pedro Do Butia     | 0.38 | 0.70 | 0.92 | 1232   | 301   | 0    |
| BRA | Brazil | 10534 | Sao Pedro Do Sul       | 0.33 | 0.67 | 0.93 | 7812   | 2121  | 0    |
| BRA | Brazil | 10535 | Sao Sebastiao Do Cai   | 0.20 | 0.58 | 0.78 | 13798  | 5128  | 351  |
| BRA | Brazil | 10536 | Sao Sepe               | 0.47 | 0.74 | 0.95 | 8063   | 1428  | 0    |
| BRA | Brazil | 10537 | Sao Valentim           | 0.13 | 0.54 | 0.77 | 2328   | 920   | 92   |
| BRA | Brazil | 10538 | Sao Valentim Do Sul    | 0.48 | 0.70 | 0.87 | 707    | 225   | 0    |
| BRA | Brazil | 10539 | Sao Valerio Do Sul     | 0.27 | 0.73 | 0.95 | 1479   | 188   | 0    |

|     |        |       |                       |      |      |      |       |       |       |
|-----|--------|-------|-----------------------|------|------|------|-------|-------|-------|
| BRA | Brazil | 10540 | Sao Vendelino         | 0.56 | 0.76 | 0.93 | 602   | 92    | 0     |
| BRA | Brazil | 10541 | Sao Vicente Do Sul    | 0.28 | 0.68 | 0.93 | 4621  | 1088  | 0     |
| BRA | Brazil | 10542 | Sapiranga             | 0.37 | 0.67 | 0.90 | 32487 | 9881  | 0     |
| BRA | Brazil | 10543 | Sapucaia Do Sul       | 0.18 | 0.51 | 0.68 | 85796 | 40097 | 16957 |
| BRA | Brazil | 10544 | Sarandi               | 0.08 | 0.40 | 0.55 | 17055 | 9410  | 5848  |
| BRA | Brazil | 10545 | Seberi                | 0.25 | 0.62 | 0.84 | 6169  | 2025  | 0     |
| BRA | Brazil | 10546 | Sede Nova             | 0.54 | 0.81 | 0.96 | 773   | 0     | 0     |
| BRA | Brazil | 10547 | Segredo               | 0.79 | 0.89 | 0.97 | 97    | 0     | 0     |
| BRA | Brazil | 10548 | Selbach               | 0.76 | 0.88 | 0.96 | 224   | 0     | 0     |
| BRA | Brazil | 10549 | Senador Salgado Filho | 0.76 | 0.89 | 0.95 | 125   | 0     | 0     |
| BRA | Brazil | 10550 | Sentinelado Sul       | 0.18 | 0.54 | 0.73 | 3446  | 1470  | 364   |
| BRA | Brazil | 10551 | Serafina Correa       | 0.68 | 0.83 | 0.94 | 2071  | 0     | 0     |
| BRA | Brazil | 10552 | Serio                 | 0.71 | 0.83 | 0.92 | 187   | 0     | 0     |
| BRA | Brazil | 10553 | Sertao                | 0.11 | 0.49 | 0.70 | 4189  | 1856  | 619   |
| BRA | Brazil | 10554 | Sertao Santana        | 0.65 | 0.81 | 0.95 | 920   | 0     | 0     |
| BRA | Brazil | 10555 | Sete De Setembro      | 0.65 | 0.85 | 0.95 | 327   | 0     | 0     |
| BRA | Brazil | 10556 | Severiano De Almeida  | 0.58 | 0.78 | 0.93 | 802   | 68    | 0     |
| BRA | Brazil | 10557 | Silveira Martins      | 0.87 | 0.91 | 0.94 | 0     | 0     | 0     |
| BRA | Brazil | 10558 | Sinimbu               | 0.73 | 0.85 | 0.94 | 716   | 0     | 0     |
| BRA | Brazil | 10559 | Sobradinho            | 0.21 | 0.56 | 0.77 | 10570 | 4332  | 519   |
| BRA | Brazil | 10560 | Soledade              | 0.17 | 0.49 | 0.65 | 19760 | 9655  | 4714  |
| BRA | Brazil | 10561 | Tabai                 | 0.28 | 0.60 | 0.85 | 2324  | 874   | 0     |
| BRA | Brazil | 10562 | Tapejara              | 0.17 | 0.52 | 0.70 | 14230 | 6421  | 2282  |
| BRA | Brazil | 10563 | Tapera                | 0.79 | 0.88 | 0.95 | 155   | 0     | 0     |
| BRA | Brazil | 10564 | Tapes                 | 0.21 | 0.56 | 0.76 | 10246 | 4090  | 682   |
| BRA | Brazil | 10565 | Taquara               | 0.29 | 0.66 | 0.93 | 28829 | 7712  | 0     |
| BRA | Brazil | 10566 | Taquari               | 0.49 | 0.71 | 0.89 | 8425  | 2288  | 0     |
| BRA | Brazil | 10567 | Taquarucu Do Sul      | 0.17 | 0.49 | 0.65 | 1940  | 948   | 463   |
| BRA | Brazil | 10568 | Tavares               | 0.08 | 0.40 | 0.55 | 3991  | 2202  | 1368  |
| BRA | Brazil | 10569 | Tenente Portela       | 0.17 | 0.49 | 0.65 | 8772  | 4287  | 2093  |
| BRA | Brazil | 10570 | Terra De Areia        | 0.08 | 0.41 | 0.58 | 9055  | 4847  | 2783  |
| BRA | Brazil | 10571 | Teutonia              | 0.50 | 0.76 | 0.96 | 9882  | 1267  | 0     |
| BRA | Brazil | 10572 | Tiradentes Do Sul     | 0.34 | 0.74 | 0.96 | 2880  | 345   | 0     |

|     |        |       |                   |      |      |      |       |       |      |
|-----|--------|-------|-------------------|------|------|------|-------|-------|------|
| BRA | Brazil | 10573 | Toropi            | 0.17 | 0.49 | 0.65 | 1683  | 822   | 402  |
| BRA | Brazil | 10574 | Torres            | 0.08 | 0.40 | 0.55 | 26448 | 14592 | 9068 |
| BRA | Brazil | 10575 | Tramandai         | 0.08 | 0.44 | 0.63 | 34862 | 17449 | 8234 |
| BRA | Brazil | 10576 | Travesseiro       | 0.50 | 0.71 | 0.88 | 788   | 244   | 0    |
| BRA | Brazil | 10577 | Tres Arroios      | 0.08 | 0.40 | 0.55 | 2111  | 1164  | 724  |
| BRA | Brazil | 10578 | Tres Cachoeiras   | 0.08 | 0.43 | 0.61 | 7914  | 4073  | 2107 |
| BRA | Brazil | 10579 | Tres Coroas       | 0.30 | 0.68 | 0.95 | 12493 | 3139  | 0    |
| BRA | Brazil | 10580 | Tres De Maio      | 0.95 | 0.97 | 0.98 | 0     | 0     | 0    |
| BRA | Brazil | 10581 | Tres Forquilhas   | 0.13 | 0.48 | 0.66 | 1944  | 937   | 412  |
| BRA | Brazil | 10582 | Tres Palmeiras    | 0.26 | 0.69 | 0.92 | 2362  | 469   | 0    |
| BRA | Brazil | 10583 | Tres Passos       | 0.37 | 0.75 | 0.96 | 10583 | 1150  | 0    |
| BRA | Brazil | 10584 | Trindade Do Sul   | 0.28 | 0.71 | 0.94 | 3120  | 519   | 0    |
| BRA | Brazil | 10585 | Triunfo           | 0.17 | 0.49 | 0.65 | 18118 | 8853  | 4323 |
| BRA | Brazil | 10586 | Tucunduva         | 0.50 | 0.80 | 0.95 | 1768  | 19    | 0    |
| BRA | Brazil | 10587 | Tunas             | 0.95 | 0.97 | 0.98 | 0     | 0     | 0    |
| BRA | Brazil | 10588 | Tupanci Do Sul    | 0.92 | 0.94 | 0.95 | 0     | 0     | 0    |
| BRA | Brazil | 10589 | Tupancireta       | 0.64 | 0.86 | 0.98 | 3792  | 0     | 0    |
| BRA | Brazil | 10590 | Tupandi           | 0.42 | 0.71 | 0.94 | 1887  | 432   | 0    |
| BRA | Brazil | 10591 | Tuparendi         | 0.17 | 0.49 | 0.65 | 5302  | 2591  | 1265 |
| BRA | Brazil | 10592 | Turucu            | 0.08 | 0.42 | 0.60 | 2565  | 1335  | 709  |
| BRA | Brazil | 10593 | Ubiretama         | 0.66 | 0.86 | 0.94 | 306   | 0     | 0    |
| BRA | Brazil | 10594 | Uniao Da Serra    | 0.70 | 0.81 | 0.91 | 143   | 0     | 0    |
| BRA | Brazil | 10595 | Unistalda         | 0.91 | 0.95 | 0.97 | 0     | 0     | 0    |
| BRA | Brazil | 10596 | Uruguaiana        | 0.29 | 0.71 | 0.98 | 65064 | 11166 | 0    |
| BRA | Brazil | 10597 | Vacaria           | 0.82 | 0.91 | 0.99 | 0     | 0     | 0    |
| BRA | Brazil | 10598 | Vale Do Sol       | 0.77 | 0.87 | 0.95 | 327   | 0     | 0    |
| BRA | Brazil | 10599 | Vale Real         | 0.66 | 0.83 | 0.96 | 773   | 0     | 0    |
| BRA | Brazil | 10600 | Vale Verde        | 0.75 | 0.85 | 0.94 | 162   | 0     | 0    |
| BRA | Brazil | 10601 | Vanini            | 0.84 | 0.89 | 0.92 | 0     | 0     | 0    |
| BRA | Brazil | 10602 | Venancio Aires    | 0.81 | 0.89 | 0.96 | 0     | 0     | 0    |
| BRA | Brazil | 10603 | Vera Cruz         | 0.17 | 0.49 | 0.65 | 16506 | 8066  | 3938 |
| BRA | Brazil | 10604 | Veranopolis       | 0.82 | 0.90 | 0.96 | 0     | 0     | 0    |
| BRA | Brazil | 10605 | Vespasiano Correa | 0.53 | 0.74 | 0.91 | 556   | 119   | 0    |

|     |        |       |                           |      |      |      |        |       |      |
|-----|--------|-------|---------------------------|------|------|------|--------|-------|------|
| BRA | Brazil | 10606 | Viadutos                  | 0.21 | 0.57 | 0.77 | 3053   | 1197  | 153  |
| BRA | Brazil | 10607 | Viamao                    | 0.35 | 0.68 | 0.94 | 112539 | 30744 | 0    |
| BRA | Brazil | 10608 | Vicente Dutra             | 0.33 | 0.71 | 0.96 | 2443   | 458   | 0    |
| BRA | Brazil | 10609 | Victor Graeff             | 0.94 | 0.97 | 0.99 | 0      | 0     | 0    |
| BRA | Brazil | 10610 | Vila Flores               | 0.74 | 0.85 | 0.94 | 220    | 0     | 0    |
| BRA | Brazil | 10611 | Vila Langaro              | 0.16 | 0.51 | 0.74 | 1364   | 624   | 123  |
| BRA | Brazil | 10612 | Vila Maria                | 0.68 | 0.82 | 0.94 | 541    | 0     | 0    |
| BRA | Brazil | 10613 | Vila Nova Do Sul          | 0.68 | 0.84 | 0.96 | 501    | 0     | 0    |
| BRA | Brazil | 10614 | Vista Alegre              | 0.48 | 0.78 | 0.96 | 890    | 56    | 0    |
| BRA | Brazil | 10615 | Vista Alegre Do Prata     | 0.65 | 0.81 | 0.94 | 244    | 0     | 0    |
| BRA | Brazil | 10616 | Vista Gaucha              | 0.37 | 0.75 | 0.94 | 1196   | 141   | 0    |
| BRA | Brazil | 10617 | Vitoria Das Missoes       | 0.80 | 0.87 | 0.93 | 0      | 0     | 0    |
| BRA | Brazil | 10618 | Xangri-la                 | 0.08 | 0.41 | 0.58 | 11747  | 6279  | 3611 |
| BRA | Brazil | 10619 | Alta Floresta D' oeste    | 0.43 | 0.92 | 1.00 | 9128   | 0     | 0    |
| BRA | Brazil | 10620 | Alto Alegre Dos Parecis   | 0.40 | 0.90 | 1.00 | 5165   | 0     | 0    |
| BRA | Brazil | 10621 | Alto Paraiso              | 0.37 | 0.89 | 0.99 | 8697   | 0     | 0    |
| BRA | Brazil | 10622 | Alvorada D' oeste         | 0.36 | 0.91 | 1.00 | 7041   | 0     | 0    |
| BRA | Brazil | 10623 | Ariquemes                 | 0.42 | 0.93 | 1.00 | 40334  | 0     | 0    |
| BRA | Brazil | 10624 | Buritis                   | 0.21 | 0.66 | 0.75 | 22188  | 5419  | 1752 |
| BRA | Brazil | 10625 | Cabixi                    | 0.40 | 0.88 | 0.99 | 2685   | 0     | 0    |
| BRA | Brazil | 10626 | Cacaulandia               | 0.45 | 0.90 | 0.99 | 2216   | 0     | 0    |
| BRA | Brazil | 10627 | Cacoal                    | 0.39 | 0.91 | 1.00 | 34224  | 0     | 0    |
| BRA | Brazil | 10628 | Campo Novo De Rondonia    | 0.33 | 0.85 | 0.95 | 6427   | 0     | 0    |
| BRA | Brazil | 10629 | Candeias Do Jamari        | 0.36 | 0.90 | 1.00 | 10175  | 0     | 0    |
| BRA | Brazil | 10630 | Castanheiras              | 0.42 | 0.91 | 0.98 | 1300   | 0     | 0    |
| BRA | Brazil | 10631 | Cerejeiras                | 0.47 | 0.92 | 1.00 | 5528   | 0     | 0    |
| BRA | Brazil | 10632 | Chupinguaia               | 0.39 | 0.91 | 1.00 | 4253   | 0     | 0    |
| BRA | Brazil | 10633 | Colorado Do Oeste         | 0.47 | 0.92 | 1.00 | 5677   | 0     | 0    |
| BRA | Brazil | 10634 | Corumbiara                | 0.39 | 0.93 | 1.00 | 3426   | 0     | 0    |
| BRA | Brazil | 10635 | Costa Marques             | 0.39 | 0.88 | 1.00 | 6681   | 0     | 0    |
| BRA | Brazil | 10636 | Cujubim                   | 0.34 | 0.83 | 0.97 | 11707  | 0     | 0    |
| BRA | Brazil | 10637 | Espigao D' oeste          | 0.39 | 0.90 | 1.00 | 12810  | 0     | 0    |
| BRA | Brazil | 10638 | Governador Jorge Teixeira | 0.47 | 0.93 | 1.00 | 3186   | 0     | 0    |

|     |        |       |                          |      |      |      |        |      |     |
|-----|--------|-------|--------------------------|------|------|------|--------|------|-----|
| BRA | Brazil | 10639 | Guajara-mirim            | 0.45 | 0.93 | 1.00 | 16131  | 0    | 0   |
| BRA | Brazil | 10640 | Jamari                   | 0.44 | 0.93 | 1.00 | 3545   | 0    | 0   |
| BRA | Brazil | 10641 | Jaru                     | 0.36 | 0.88 | 1.00 | 23172  | 0    | 0   |
| BRA | Brazil | 10642 | Ji-parana                | 0.39 | 0.89 | 1.00 | 51116  | 0    | 0   |
| BRA | Brazil | 10643 | Machadinho D'oeste       | 0.37 | 0.89 | 1.00 | 16165  | 0    | 0   |
| BRA | Brazil | 10644 | Ministro Andreazza       | 0.40 | 0.90 | 1.00 | 4227   | 0    | 0   |
| BRA | Brazil | 10645 | Mirante Da Serra         | 0.44 | 0.90 | 0.99 | 4163   | 0    | 0   |
| BRA | Brazil | 10646 | Monte Negro              | 0.45 | 0.95 | 1.00 | 4478   | 0    | 0   |
| BRA | Brazil | 10647 | Nova Brasilandia D'oeste | 0.39 | 0.92 | 1.00 | 7773   | 0    | 0   |
| BRA | Brazil | 10648 | Nova Mamore              | 0.36 | 0.90 | 1.00 | 12451  | 0    | 0   |
| BRA | Brazil | 10649 | Nova Uniao               | 0.21 | 0.66 | 0.75 | 4345   | 1061 | 343 |
| BRA | Brazil | 10650 | Novo Horizonte Do Oeste  | 0.44 | 0.91 | 0.99 | 3393   | 0    | 0   |
| BRA | Brazil | 10651 | Ouro Preto Do Oeste      | 0.38 | 0.91 | 1.00 | 15796  | 0    | 0   |
| BRA | Brazil | 10652 | Parecis                  | 0.42 | 0.89 | 0.99 | 2177   | 0    | 0   |
| BRA | Brazil | 10653 | Pimenta Bueno            | 0.41 | 0.91 | 1.00 | 14225  | 0    | 0   |
| BRA | Brazil | 10654 | Pimenteiras Do Oeste     | 0.70 | 0.95 | 1.00 | 156    | 0    | 0   |
| BRA | Brazil | 10655 | Porto Velho              | 0.37 | 0.91 | 1.00 | 214113 | 0    | 0   |
| BRA | Brazil | 10656 | Presidente Medici        | 0.21 | 0.66 | 0.75 | 12336  | 3013 | 974 |
| BRA | Brazil | 10657 | Primavera De Rondonia    | 0.49 | 0.95 | 1.00 | 1042   | 0    | 0   |
| BRA | Brazil | 10658 | Rio Crespo               | 0.61 | 0.93 | 0.99 | 715    | 0    | 0   |
| BRA | Brazil | 10659 | Rolim De Moura           | 0.39 | 0.90 | 1.00 | 22338  | 0    | 0   |
| BRA | Brazil | 10660 | Santa Luzia D'oeste      | 0.44 | 0.91 | 1.00 | 2879   | 0    | 0   |
| BRA | Brazil | 10661 | Sao Felipe D'oeste       | 0.43 | 0.93 | 1.00 | 2099   | 0    | 0   |
| BRA | Brazil | 10662 | Sao Francisco Do Guapore | 0.36 | 0.87 | 1.00 | 8681   | 0    | 0   |
| BRA | Brazil | 10663 | Sao Miguel Do Guapore    | 0.38 | 0.88 | 0.99 | 10427  | 0    | 0   |
| BRA | Brazil | 10664 | Seringueiras             | 0.38 | 0.91 | 1.00 | 4981   | 0    | 0   |
| BRA | Brazil | 10665 | Teixeiropolis            | 0.45 | 0.93 | 1.00 | 1638   | 0    | 0   |
| BRA | Brazil | 10666 | Theobroma                | 0.35 | 0.87 | 0.99 | 4820   | 0    | 0   |
| BRA | Brazil | 10667 | Urupa                    | 0.39 | 0.90 | 1.00 | 5142   | 0    | 0   |
| BRA | Brazil | 10668 | Vale Do Anari            | 0.35 | 0.86 | 0.98 | 4763   | 0    | 0   |
| BRA | Brazil | 10669 | Vale Do Paraiso          | 0.40 | 0.91 | 1.00 | 3039   | 0    | 0   |
| BRA | Brazil | 10670 | Vilhena                  | 0.40 | 0.89 | 1.00 | 36956  | 0    | 0   |
| BRA | Brazil | 10671 | Alto Alegre              | 0.21 | 0.66 | 0.75 | 9637   | 2354 | 761 |

|     |        |       |                    |      |      |      |        |       |       |
|-----|--------|-------|--------------------|------|------|------|--------|-------|-------|
| BRA | Brazil | 10672 | Amajari            | 0.36 | 0.90 | 1.00 | 5756   | 0     | 0     |
| BRA | Brazil | 10673 | Boa Vista          | 0.21 | 0.66 | 0.75 | 206713 | 50489 | 16322 |
| BRA | Brazil | 10674 | Bonfim             | 0.21 | 0.66 | 0.75 | 7112   | 1737  | 562   |
| BRA | Brazil | 10675 | Canta              | 0.32 | 0.86 | 0.99 | 8987   | 0     | 0     |
| BRA | Brazil | 10676 | Caracarai          | 0.36 | 0.89 | 1.00 | 9560   | 0     | 0     |
| BRA | Brazil | 10677 | Caroebe            | 0.40 | 0.91 | 1.00 | 3951   | 0     | 0     |
| BRA | Brazil | 10678 | Iracema            | 0.21 | 0.66 | 0.75 | 7028   | 1717  | 555   |
| BRA | Brazil | 10679 | Mucajai            | 0.35 | 0.89 | 1.00 | 7801   | 0     | 0     |
| BRA | Brazil | 10680 | Normandia          | 0.38 | 0.91 | 1.00 | 4693   | 0     | 0     |
| BRA | Brazil | 10681 | Pacaraima          | 0.91 | 0.99 | 1.00 | 0      | 0     | 0     |
| BRA | Brazil | 10682 | Rorainopolis       | 0.35 | 0.86 | 0.99 | 13650  | 0     | 0     |
| BRA | Brazil | 10683 | Sao Joao Da Baliza | 0.38 | 0.89 | 1.00 | 3412   | 0     | 0     |
| BRA | Brazil | 10684 | Sao Luiz           | 0.37 | 0.85 | 0.96 | 3392   | 0     | 0     |
| BRA | Brazil | 10685 | Uiramuta           | 0.41 | 0.93 | 1.00 | 4009   | 0     | 0     |
| BRA | Brazil | 10686 | Abdon Batista      | 0.80 | 0.90 | 0.99 | 0      | 0     | 0     |
| BRA | Brazil | 10687 | Abelardo Luz       | 0.17 | 0.49 | 0.65 | 11951  | 5840  | 2851  |
| BRA | Brazil | 10688 | Agrolandia         | 0.08 | 0.40 | 0.55 | 7571   | 4177  | 2596  |
| BRA | Brazil | 10689 | Agronomica         | 0.08 | 0.42 | 0.60 | 4009   | 2085  | 1095  |
| BRA | Brazil | 10690 | Agua Doce          | 0.38 | 0.80 | 0.97 | 3096   | 0     | 0     |
| BRA | Brazil | 10691 | Aguas De Chapeco   | 0.36 | 0.80 | 0.95 | 2716   | 0     | 0     |
| BRA | Brazil | 10692 | Aguas Frias        | 0.08 | 0.40 | 0.55 | 1773   | 978   | 608   |
| BRA | Brazil | 10693 | Aguas Mornas       | 0.08 | 0.40 | 0.55 | 3997   | 2206  | 1371  |
| BRA | Brazil | 10694 | Alfredo Wagner     | 0.08 | 0.42 | 0.58 | 7189   | 3819  | 2160  |
| BRA | Brazil | 10695 | Alto Bela Vista    | 0.47 | 0.73 | 0.90 | 728    | 156   | 0     |
| BRA | Brazil | 10696 | Anchieta           | 0.17 | 0.49 | 0.65 | 3935   | 1923  | 939   |
| BRA | Brazil | 10697 | Angelina           | 0.08 | 0.41 | 0.56 | 3867   | 2105  | 1264  |
| BRA | Brazil | 10698 | Anita Garibaldi    | 0.17 | 0.49 | 0.65 | 5248   | 2564  | 1252  |
| BRA | Brazil | 10699 | Anitapolis         | 0.08 | 0.40 | 0.55 | 2552   | 1408  | 875   |
| BRA | Brazil | 10700 | Antonio Carlos     | 0.08 | 0.40 | 0.55 | 6342   | 3499  | 2175  |
| BRA | Brazil | 10701 | Apiuna             | 0.08 | 0.42 | 0.58 | 7380   | 3921  | 2218  |
| BRA | Brazil | 10702 | Arabuta            | 0.08 | 0.40 | 0.55 | 2994   | 1652  | 1026  |
| BRA | Brazil | 10703 | Araquari           | 0.08 | 0.40 | 0.55 | 27808  | 15342 | 9534  |
| BRA | Brazil | 10704 | Ararangua          | 0.08 | 0.40 | 0.55 | 48113  | 26545 | 16496 |



|     |        |       |                           |      |      |      |        |        |       |
|-----|--------|-------|---------------------------|------|------|------|--------|--------|-------|
| BRA | Brazil | 10705 | Armazem                   | 0.08 | 0.42 | 0.60 | 5606   | 2926   | 1571  |
| BRA | Brazil | 10706 | Arroio Trinta             | 0.21 | 0.64 | 0.87 | 2286   | 631    | 0     |
| BRA | Brazil | 10707 | Arvoredo                  | 0.08 | 0.40 | 0.55 | 1606   | 886    | 551   |
| BRA | Brazil | 10708 | Ascurra                   | 0.08 | 0.40 | 0.55 | 6105   | 3368   | 2093  |
| BRA | Brazil | 10709 | Atalanta                  | 0.08 | 0.40 | 0.55 | 2339   | 1290   | 802   |
| BRA | Brazil | 10710 | Aurora                    | 0.08 | 0.40 | 0.55 | 4538   | 2504   | 1556  |
| BRA | Brazil | 10711 | Balneario Arroio Do Silva | 0.08 | 0.40 | 0.55 | 8951   | 4938   | 3069  |
| BRA | Brazil | 10712 | Balneario Barra Do Sul    | 0.08 | 0.40 | 0.55 | 7105   | 3920   | 2436  |
| BRA | Brazil | 10713 | Balneario Camboriu        | 0.08 | 0.40 | 0.55 | 92419  | 50990  | 31687 |
| BRA | Brazil | 10714 | Balneario Gaivota         | 0.08 | 0.43 | 0.60 | 7533   | 3876   | 2051  |
| BRA | Brazil | 10715 | Bandeirante               | 0.76 | 0.89 | 0.98 | 122    | 0      | 0     |
| BRA | Brazil | 10716 | Barra Bonita              | 1.00 | 1.00 | 1.00 | 0      | 0      | 0     |
| BRA | Brazil | 10717 | Barra Velha               | 0.08 | 0.42 | 0.59 | 19535  | 10242  | 5597  |
| BRA | Brazil | 10718 | Bela Vista Do Toldo       | 0.27 | 0.67 | 0.93 | 3376   | 825    | 0     |
| BRA | Brazil | 10719 | Belmonte                  | 0.17 | 0.49 | 0.65 | 1732   | 846    | 413   |
| BRA | Brazil | 10720 | Benedito Novo             | 0.08 | 0.40 | 0.55 | 8108   | 4473   | 2780  |
| BRA | Brazil | 10721 | Biguacu                   | 0.08 | 0.40 | 0.55 | 42261  | 23317  | 14490 |
| BRA | Brazil | 10722 | Blumenau                  | 0.08 | 0.44 | 0.63 | 248095 | 123650 | 57348 |
| BRA | Brazil | 10723 | Bocaina Do Sul            | 0.08 | 0.40 | 0.55 | 2510   | 1385   | 860   |
| BRA | Brazil | 10724 | Bom Jardim Da Serra       | 0.30 | 0.62 | 0.85 | 2353   | 863    | 0     |
| BRA | Brazil | 10725 | Bom Jesus                 | 0.08 | 0.40 | 0.55 | 2105   | 1161   | 722   |
| BRA | Brazil | 10726 | Bom Jesus Do Oeste        | 0.64 | 0.80 | 0.92 | 353    | 9      | 0     |
| BRA | Brazil | 10727 | Bom Retiro                | 0.08 | 0.40 | 0.55 | 7268   | 4010   | 2492  |
| BRA | Brazil | 10728 | Bombinhas                 | 0.08 | 0.44 | 0.63 | 12778  | 6416   | 3081  |
| BRA | Brazil | 10729 | Botuvera                  | 0.08 | 0.40 | 0.55 | 4222   | 2329   | 1447  |
| BRA | Brazil | 10730 | Braco Do Norte            | 0.08 | 0.40 | 0.55 | 20033  | 11052  | 6868  |
| BRA | Brazil | 10731 | Braco Do Trombudo         | 0.08 | 0.42 | 0.58 | 2624   | 1393   | 787   |
| BRA | Brazil | 10732 | Brunopolis                | 0.17 | 0.49 | 0.65 | 1713   | 837    | 409   |
| BRA | Brazil | 10733 | Brusque                   | 0.08 | 0.44 | 0.63 | 93733  | 47081  | 22374 |
| BRA | Brazil | 10734 | Cacador                   | 0.20 | 0.62 | 0.88 | 46629  | 13843  | 0     |
| BRA | Brazil | 10735 | Caibi                     | 0.42 | 0.80 | 0.97 | 2465   | 0      | 0     |
| BRA | Brazil | 10736 | Calmon                    | 0.08 | 0.40 | 0.55 | 2551   | 1408   | 875   |
| BRA | Brazil | 10737 | Camboriu                  | 0.08 | 0.42 | 0.59 | 58549  | 30980  | 17427 |

|     |        |       |                     |      |      |      |        |       |       |
|-----|--------|-------|---------------------|------|------|------|--------|-------|-------|
| BRA | Brazil | 10738 | Campo Alegre        | 0.08 | 0.40 | 0.55 | 9378   | 5174  | 3215  |
| BRA | Brazil | 10739 | Campo Belo Do Sul   | 0.99 | 0.99 | 1.00 | 0      | 0     | 0     |
| BRA | Brazil | 10740 | Campo Ere           | 0.36 | 0.82 | 0.99 | 3879   | 0     | 0     |
| BRA | Brazil | 10741 | Campos Novos        | 0.17 | 0.49 | 0.65 | 23708  | 11585 | 5656  |
| BRA | Brazil | 10742 | Canelinha           | 0.08 | 0.41 | 0.57 | 8694   | 4672  | 2722  |
| BRA | Brazil | 10743 | Canoinhas           | 0.19 | 0.59 | 0.81 | 33869  | 11864 | 0     |
| BRA | Brazil | 10744 | Capao Alto          | 0.77 | 0.89 | 0.97 | 69     | 0     | 0     |
| BRA | Brazil | 10745 | Capinzal            | 0.17 | 0.49 | 0.65 | 13656  | 6673  | 3258  |
| BRA | Brazil | 10746 | Capivari De Baixo   | 0.08 | 0.44 | 0.64 | 17186  | 8494  | 3726  |
| BRA | Brazil | 10747 | Catanduvas          | 0.08 | 0.40 | 0.55 | 7647   | 4219  | 2622  |
| BRA | Brazil | 10748 | Caxambu Do Sul      | 0.23 | 0.67 | 0.90 | 2415   | 557   | 0     |
| BRA | Brazil | 10749 | Celso Ramos         | 0.92 | 0.96 | 0.99 | 0      | 0     | 0     |
| BRA | Brazil | 10750 | Cerro Negro         | 0.17 | 0.49 | 0.65 | 2154   | 1052  | 514   |
| BRA | Brazil | 10751 | Chapadao Do Lageado | 0.08 | 0.41 | 0.57 | 1988   | 1074  | 636   |
| BRA | Brazil | 10752 | Chapeco             | 0.08 | 0.40 | 0.55 | 152511 | 84144 | 52291 |
| BRA | Brazil | 10753 | Cocal Do Sul        | 0.08 | 0.44 | 0.63 | 12525  | 6318  | 3016  |
| BRA | Brazil | 10754 | Concordia           | 0.19 | 0.68 | 0.91 | 45462  | 8860  | 0     |
| BRA | Brazil | 10755 | Cordilheira Alta    | 0.24 | 0.72 | 0.90 | 2463   | 358   | 0     |
| BRA | Brazil | 10756 | Coronel Freitas     | 0.19 | 0.58 | 0.80 | 6284   | 2261  | 0     |
| BRA | Brazil | 10757 | Coronel Martins     | 0.17 | 0.49 | 0.65 | 1523   | 744   | 363   |
| BRA | Brazil | 10758 | Correia Pinto       | 0.08 | 0.40 | 0.55 | 9999   | 5517  | 3428  |
| BRA | Brazil | 10759 | Corupa              | 0.08 | 0.45 | 0.65 | 11111  | 5450  | 2366  |
| BRA | Brazil | 10760 | Criciuma            | 0.08 | 0.44 | 0.63 | 147523 | 74076 | 34885 |
| BRA | Brazil | 10761 | Cunha Pora          | 0.56 | 0.81 | 0.96 | 2715   | 0     | 0     |
| BRA | Brazil | 10762 | Cunhatai            | 0.53 | 0.79 | 0.93 | 521    | 21    | 0     |
| BRA | Brazil | 10763 | Curitibanos         | 0.19 | 0.61 | 0.86 | 24176  | 7415  | 0     |
| BRA | Brazil | 10764 | Descanso            | 0.70 | 0.86 | 0.97 | 833    | 0     | 0     |
| BRA | Brazil | 10765 | Dionisio Cerqueira  | 0.17 | 0.49 | 0.65 | 2377   | 1162  | 567   |
| BRA | Brazil | 10766 | Dona Emma           | 0.08 | 0.40 | 0.55 | 2813   | 1552  | 964   |
| BRA | Brazil | 10767 | Doutor Pedrinho     | 0.12 | 0.47 | 0.65 | 2608   | 1257  | 565   |
| BRA | Brazil | 10768 | Entre Rios          | 0.08 | 0.40 | 0.55 | 2304   | 1271  | 790   |
| BRA | Brazil | 10769 | Ermo                | 0.08 | 0.43 | 0.62 | 1602   | 815   | 401   |
| BRA | Brazil | 10770 | Erval Velho         | 0.33 | 0.70 | 0.95 | 2209   | 457   | 0     |

|     |        |       |                        |      |      |      |        |        |       |
|-----|--------|-------|------------------------|------|------|------|--------|--------|-------|
| BRA | Brazil | 10771 | Faxinal Dos Guedes     | 0.34 | 0.75 | 0.96 | 4887   | 546    | 0     |
| BRA | Brazil | 10772 | Flor Do Sertao         | 0.17 | 0.49 | 0.65 | 1088   | 532    | 260   |
| BRA | Brazil | 10773 | Florianopolis          | 0.08 | 0.48 | 0.72 | 340208 | 152875 | 39472 |
| BRA | Brazil | 10774 | Formosa Do Sul         | 0.08 | 0.40 | 0.55 | 1861   | 1026   | 638   |
| BRA | Brazil | 10775 | Forquilha              | 0.08 | 0.42 | 0.59 | 18720  | 9825   | 5370  |
| BRA | Brazil | 10776 | Fraiburgo              | 0.32 | 0.80 | 1.00 | 13990  | 0      | 0     |
| BRA | Brazil | 10777 | Frei Rogerio           | 0.45 | 0.78 | 0.96 | 788    | 51     | 0     |
| BRA | Brazil | 10778 | Galvao                 | 0.17 | 0.49 | 0.65 | 2134   | 1043   | 509   |
| BRA | Brazil | 10779 | Garopaba               | 0.08 | 0.40 | 0.55 | 14619  | 8066   | 5012  |
| BRA | Brazil | 10780 | Garuva                 | 0.08 | 0.40 | 0.55 | 12434  | 6860   | 4263  |
| BRA | Brazil | 10781 | Gaspar                 | 0.08 | 0.40 | 0.55 | 46663  | 25745  | 15999 |
| BRA | Brazil | 10782 | Governador Celso Ramos | 0.08 | 0.40 | 0.55 | 10522  | 5805   | 3608  |
| BRA | Brazil | 10783 | Grao Para              | 0.08 | 0.40 | 0.55 | 4456   | 2459   | 1528  |
| BRA | Brazil | 10784 | Gravatal               | 0.08 | 0.40 | 0.55 | 8368   | 4617   | 2869  |
| BRA | Brazil | 10785 | Guabiruba              | 0.08 | 0.43 | 0.61 | 16432  | 8418   | 4310  |
| BRA | Brazil | 10786 | Guaraciaba             | 0.17 | 0.49 | 0.65 | 6870   | 3357   | 1639  |
| BRA | Brazil | 10787 | Guaramirim             | 0.08 | 0.45 | 0.65 | 30281  | 14640  | 6170  |
| BRA | Brazil | 10788 | Guaruja Do Sul         | 0.60 | 0.83 | 0.97 | 1039   | 0      | 0     |
| BRA | Brazil | 10789 | Guatambu               | 0.26 | 0.71 | 0.92 | 2664   | 418    | 0     |
| BRA | Brazil | 10790 | Herval D'oeste         | 0.22 | 0.63 | 0.89 | 12748  | 3752   | 0     |
| BRA | Brazil | 10791 | Ibiam                  | 0.28 | 0.72 | 0.94 | 1024   | 151    | 0     |
| BRA | Brazil | 10792 | Ibicare                | 0.08 | 0.40 | 0.55 | 2559   | 1412   | 877   |
| BRA | Brazil | 10793 | Ibirama                | 0.08 | 0.40 | 0.55 | 13446  | 7418   | 4610  |
| BRA | Brazil | 10794 | Icara                  | 0.08 | 0.40 | 0.55 | 52250  | 28828  | 17915 |
| BRA | Brazil | 10795 | Ilhota                 | 0.08 | 0.40 | 0.55 | 9511   | 5248   | 3261  |
| BRA | Brazil | 10796 | Imarui                 | 0.08 | 0.40 | 0.55 | 8086   | 4461   | 2772  |
| BRA | Brazil | 10797 | Imbituba               | 0.08 | 0.40 | 0.55 | 31982  | 17645  | 10965 |
| BRA | Brazil | 10798 | Imbuia                 | 0.08 | 0.40 | 0.55 | 4229   | 2333   | 1450  |
| BRA | Brazil | 10799 | Indaial                | 0.08 | 0.42 | 0.59 | 47974  | 25362  | 14148 |
| BRA | Brazil | 10800 | Iomere                 | 0.37 | 0.77 | 0.93 | 1236   | 74     | 0     |
| BRA | Brazil | 10801 | Ipira                  | 0.08 | 0.40 | 0.55 | 3748   | 2068   | 1285  |
| BRA | Brazil | 10802 | Ipora Do Oeste         | 0.76 | 0.89 | 0.98 | 341    | 0      | 0     |
| BRA | Brazil | 10803 | Ipuacu                 | 0.32 | 0.80 | 1.00 | 3497   | 24     | 0     |

|     |        |       |                 |      |      |      |        |        |        |
|-----|--------|-------|-----------------|------|------|------|--------|--------|--------|
| BRA | Brazil | 10804 | Ipumirim        | 0.22 | 0.70 | 0.92 | 4316   | 784    | 0      |
| BRA | Brazil | 10805 | Iraceminha      | 0.41 | 0.73 | 0.96 | 1593   | 296    | 0      |
| BRA | Brazil | 10806 | Irani           | 0.51 | 0.78 | 0.95 | 3011   | 217    | 0      |
| BRA | Brazil | 10807 | Irati           | 0.08 | 0.40 | 0.55 | 1505   | 831    | 516    |
| BRA | Brazil | 10808 | Irineopolis     | 0.26 | 0.73 | 0.96 | 5925   | 792    | 0      |
| BRA | Brazil | 10809 | Ita             | 0.33 | 0.74 | 0.95 | 2997   | 362    | 0      |
| BRA | Brazil | 10810 | Itaiopolis      | 0.08 | 0.40 | 0.55 | 15486  | 8544   | 5310   |
| BRA | Brazil | 10811 | Itajai          | 0.08 | 0.40 | 0.55 | 156074 | 86110  | 53513  |
| BRA | Brazil | 10812 | Itapema         | 0.08 | 0.45 | 0.65 | 39828  | 19370  | 8272   |
| BRA | Brazil | 10813 | Itapiranga      | 0.17 | 0.49 | 0.65 | 10344  | 5055   | 2468   |
| BRA | Brazil | 10814 | Itapoa          | 0.08 | 0.40 | 0.55 | 13361  | 7372   | 4581   |
| BRA | Brazil | 10815 | Ituporanga      | 0.08 | 0.42 | 0.59 | 17713  | 9305   | 5093   |
| BRA | Brazil | 10816 | Jabora          | 0.08 | 0.40 | 0.55 | 2923   | 1613   | 1002   |
| BRA | Brazil | 10817 | Jacinto Machado | 0.08 | 0.40 | 0.55 | 7421   | 4094   | 2544   |
| BRA | Brazil | 10818 | Jaguaruna       | 0.08 | 0.40 | 0.55 | 13891  | 7664   | 4763   |
| BRA | Brazil | 10819 | Jaragua Do Sul  | 0.08 | 0.45 | 0.65 | 122721 | 59808  | 26144  |
| BRA | Brazil | 10820 | Jardinopolis    | 0.23 | 0.69 | 0.92 | 991    | 190    | 0      |
| BRA | Brazil | 10821 | Joacaba         | 0.08 | 0.40 | 0.55 | 21681  | 11962  | 7434   |
| BRA | Brazil | 10822 | Joinville       | 0.08 | 0.40 | 0.55 | 399559 | 220447 | 136996 |
| BRA | Brazil | 10823 | Jose Boiteux    | 0.16 | 0.54 | 0.75 | 2624   | 1060   | 209    |
| BRA | Brazil | 10824 | Jupia           | 0.32 | 0.78 | 0.97 | 1028   | 45     | 0      |
| BRA | Brazil | 10825 | Lacerdopolis    | 0.48 | 0.79 | 0.97 | 671    | 14     | 0      |
| BRA | Brazil | 10826 | Lages           | 0.17 | 0.49 | 0.65 | 101770 | 49729  | 24280  |
| BRA | Brazil | 10827 | Laguna          | 0.08 | 0.43 | 0.60 | 38396  | 19905  | 10439  |
| BRA | Brazil | 10828 | Lajeado Grande  | 0.08 | 0.40 | 0.55 | 1110   | 613    | 381    |
| BRA | Brazil | 10829 | Laurentino      | 0.08 | 0.40 | 0.55 | 4726   | 2608   | 1620   |
| BRA | Brazil | 10830 | Lauro Muller    | 0.08 | 0.43 | 0.61 | 10799  | 5562   | 2887   |
| BRA | Brazil | 10831 | Lebon Regis     | 0.08 | 0.40 | 0.55 | 9089   | 5015   | 3116   |
| BRA | Brazil | 10832 | Leoberto Leal   | 0.08 | 0.41 | 0.56 | 2424   | 1323   | 799    |
| BRA | Brazil | 10833 | Lindoia Do Sul  | 0.08 | 0.40 | 0.55 | 3345   | 1845   | 1147   |
| BRA | Brazil | 10834 | Lontras         | 0.08 | 0.40 | 0.55 | 8642   | 4768   | 2963   |
| BRA | Brazil | 10835 | Luiz Alves      | 0.08 | 0.43 | 0.60 | 8831   | 4585   | 2448   |
| BRA | Brazil | 10836 | Luzerna         | 0.31 | 0.64 | 0.85 | 2764   | 912    | 0      |

|     |        |       |                 |      |      |      |        |       |       |
|-----|--------|-------|-----------------|------|------|------|--------|-------|-------|
| BRA | Brazil | 10837 | Macieira        | 0.38 | 0.79 | 0.97 | 727    | 22    | 0     |
| BRA | Brazil | 10838 | Mafra           | 0.08 | 0.40 | 0.55 | 42445  | 23418 | 14553 |
| BRA | Brazil | 10839 | Major Gercino   | 0.08 | 0.42 | 0.59 | 2478   | 1312  | 730   |
| BRA | Brazil | 10840 | Major Vieira    | 0.08 | 0.40 | 0.55 | 5904   | 3257  | 2024  |
| BRA | Brazil | 10841 | Maracaja        | 0.08 | 0.42 | 0.60 | 5198   | 2721  | 1462  |
| BRA | Brazil | 10842 | Maravilha       | 0.17 | 0.49 | 0.65 | 15600  | 7623  | 3722  |
| BRA | Brazil | 10843 | Marema          | 0.08 | 0.40 | 0.55 | 1463   | 807   | 502   |
| BRA | Brazil | 10844 | Massaranduba    | 0.08 | 0.40 | 0.55 | 12462  | 6876  | 4273  |
| BRA | Brazil | 10845 | Matos Costa     | 0.08 | 0.40 | 0.55 | 1993   | 1100  | 683   |
| BRA | Brazil | 10846 | Meleiro         | 0.08 | 0.40 | 0.55 | 5127   | 2829  | 1758  |
| BRA | Brazil | 10847 | Mirim Doce      | 0.08 | 0.43 | 0.61 | 1814   | 932   | 478   |
| BRA | Brazil | 10848 | Modelo          | 0.36 | 0.73 | 0.90 | 1993   | 307   | 0     |
| BRA | Brazil | 10849 | Mondai          | 0.59 | 0.82 | 0.96 | 2390   | 0     | 0     |
| BRA | Brazil | 10850 | Monte Carlo     | 0.24 | 0.63 | 0.85 | 5550   | 1708  | 0     |
| BRA | Brazil | 10851 | Monte Castelo   | 0.08 | 0.40 | 0.55 | 5877   | 3243  | 2015  |
| BRA | Brazil | 10852 | Morro Da Fumaca | 0.08 | 0.40 | 0.55 | 12439  | 6863  | 4265  |
| BRA | Brazil | 10853 | Morro Grande    | 0.08 | 0.40 | 0.55 | 2103   | 1161  | 721   |
| BRA | Brazil | 10854 | Navegantes      | 0.08 | 0.46 | 0.68 | 51643  | 24507 | 8751  |
| BRA | Brazil | 10855 | Nova Erechim    | 0.19 | 0.58 | 0.81 | 2901   | 1036  | 0     |
| BRA | Brazil | 10856 | Nova Itaberaba  | 0.08 | 0.40 | 0.55 | 3179   | 1754  | 1090  |
| BRA | Brazil | 10857 | Nova Trento     | 0.08 | 0.40 | 0.55 | 10121  | 5584  | 3470  |
| BRA | Brazil | 10858 | Nova Veneza     | 0.08 | 0.40 | 0.55 | 10025  | 5531  | 3437  |
| BRA | Brazil | 10859 | Novo Horizonte  | 0.17 | 0.49 | 0.65 | 1701   | 831   | 406   |
| BRA | Brazil | 10860 | Orleans         | 0.08 | 0.42 | 0.59 | 19582  | 10296 | 5700  |
| BRA | Brazil | 10861 | Otacilio Costa  | 0.26 | 0.66 | 0.90 | 9896   | 2485  | 0     |
| BRA | Brazil | 10862 | Ouro            | 0.45 | 0.77 | 0.94 | 2314   | 177   | 0     |
| BRA | Brazil | 10863 | Ouro Verde      | 0.92 | 0.99 | 1.00 | 0      | 0     | 0     |
| BRA | Brazil | 10864 | Paial           | 0.67 | 0.84 | 0.95 | 217    | 0     | 0     |
| BRA | Brazil | 10865 | Painel          | 0.08 | 0.40 | 0.55 | 1836   | 1013  | 630   |
| BRA | Brazil | 10866 | Palhoca         | 0.08 | 0.43 | 0.60 | 109255 | 56563 | 29966 |
| BRA | Brazil | 10867 | Palma Sola      | 0.56 | 0.84 | 0.99 | 2040   | 0     | 0     |
| BRA | Brazil | 10868 | Palmeira        | 0.08 | 0.40 | 0.55 | 2159   | 1191  | 740   |
| BRA | Brazil | 10869 | Palmitos        | 0.49 | 0.81 | 0.98 | 5174   | 0     | 0     |

|     |        |       |                           |      |      |      |       |       |       |
|-----|--------|-------|---------------------------|------|------|------|-------|-------|-------|
| BRA | Brazil | 10870 | Papanduva                 | 0.44 | 0.76 | 0.96 | 7150  | 823   | 0     |
| BRA | Brazil | 10871 | Paraiso                   | 0.54 | 0.92 | 1.00 | 1025  | 0     | 0     |
| BRA | Brazil | 10872 | Passo De Torres           | 0.08 | 0.41 | 0.58 | 6475  | 3468  | 2005  |
| BRA | Brazil | 10873 | Passos Maia               | 0.17 | 0.49 | 0.65 | 2507  | 1225  | 598   |
| BRA | Brazil | 10874 | Paulo Lopes               | 0.08 | 0.40 | 0.55 | 5517  | 3044  | 1892  |
| BRA | Brazil | 10875 | Pedras Grandes            | 0.08 | 0.40 | 0.55 | 2979  | 1644  | 1021  |
| BRA | Brazil | 10876 | Penha                     | 0.08 | 0.43 | 0.62 | 21235 | 10790 | 5251  |
| BRA | Brazil | 10877 | Peritiba                  | 0.08 | 0.40 | 0.55 | 2159  | 1191  | 740   |
| BRA | Brazil | 10878 | Petrolandia               | 0.08 | 0.40 | 0.55 | 4475  | 2469  | 1534  |
| BRA | Brazil | 10879 | Picarras                  | 0.08 | 0.45 | 0.65 | 14257 | 6913  | 2875  |
| BRA | Brazil | 10880 | Pinhalzinho               | 0.28 | 0.76 | 0.94 | 10070 | 867   | 0     |
| BRA | Brazil | 10881 | Pinheiro Preto            | 0.20 | 0.61 | 0.86 | 2078  | 640   | 0     |
| BRA | Brazil | 10882 | Piratuba                  | 0.97 | 0.98 | 0.98 | 0     | 0     | 0     |
| BRA | Brazil | 10883 | Planalto Alegre           | 0.08 | 0.40 | 0.55 | 1999  | 1103  | 685   |
| BRA | Brazil | 10884 | Pomerode                  | 0.08 | 0.44 | 0.64 | 23528 | 11709 | 5322  |
| BRA | Brazil | 10885 | Ponte Alta                | 0.17 | 0.53 | 0.72 | 3157  | 1341  | 409   |
| BRA | Brazil | 10886 | Ponte Alta Do Norte       | 0.31 | 0.71 | 0.97 | 1696  | 318   | 0     |
| BRA | Brazil | 10887 | Ponte Serrada             | 0.08 | 0.40 | 0.55 | 8457  | 4666  | 2900  |
| BRA | Brazil | 10888 | Porto Belo                | 0.08 | 0.42 | 0.60 | 17163 | 8963  | 4850  |
| BRA | Brazil | 10889 | Porto Uniao               | 0.08 | 0.40 | 0.55 | 25955 | 14320 | 8899  |
| BRA | Brazil | 10890 | Pouso Redondo             | 0.08 | 0.40 | 0.55 | 12105 | 6678  | 4150  |
| BRA | Brazil | 10891 | Praia Grande              | 0.32 | 0.80 | 0.89 | 3443  | 0     | 0     |
| BRA | Brazil | 10892 | Presidente Castelo Branco | 0.08 | 0.40 | 0.55 | 1077  | 594   | 369   |
| BRA | Brazil | 10893 | Presidente Getulio        | 0.08 | 0.40 | 0.55 | 12474 | 6882  | 4277  |
| BRA | Brazil | 10894 | Presidente Nereu          | 0.08 | 0.41 | 0.57 | 1714  | 929   | 551   |
| BRA | Brazil | 10895 | Princesa                  | 0.67 | 0.86 | 0.98 | 398   | 0     | 0     |
| BRA | Brazil | 10896 | Quilombo                  | 0.08 | 0.40 | 0.55 | 7478  | 4126  | 2564  |
| BRA | Brazil | 10897 | Rancho Queimado           | 0.08 | 0.43 | 0.61 | 2021  | 1043  | 537   |
| BRA | Brazil | 10898 | Rio Das Antas             | 0.08 | 0.40 | 0.55 | 4749  | 2620  | 1628  |
| BRA | Brazil | 10899 | Rio Do Campo              | 0.08 | 0.40 | 0.55 | 4361  | 2406  | 1495  |
| BRA | Brazil | 10900 | Rio Do Oeste              | 0.08 | 0.40 | 0.55 | 5488  | 3028  | 1882  |
| BRA | Brazil | 10901 | Rio Do Sul                | 0.08 | 0.40 | 0.55 | 49248 | 27171 | 16885 |
| BRA | Brazil | 10902 | Rio Dos Cedros            | 0.08 | 0.40 | 0.55 | 7946  | 4384  | 2724  |

|     |        |       |                              |      |      |      |        |       |       |
|-----|--------|-------|------------------------------|------|------|------|--------|-------|-------|
| BRA | Brazil | 10903 | Rio Fortuna                  | 0.08 | 0.46 | 0.67 | 3224   | 1539  | 571   |
| BRA | Brazil | 10904 | Rio Negrinho                 | 0.23 | 0.67 | 0.92 | 22949  | 5408  | 0     |
| BRA | Brazil | 10905 | Rio Rufino                   | 0.13 | 0.47 | 0.64 | 1734   | 854   | 416   |
| BRA | Brazil | 10906 | Riqueza                      | 0.17 | 0.49 | 0.65 | 2958   | 1446  | 706   |
| BRA | Brazil | 10907 | Rodeio                       | 0.08 | 0.42 | 0.60 | 8501   | 4446  | 2402  |
| BRA | Brazil | 10908 | Romelandia                   | 0.17 | 0.49 | 0.65 | 3495   | 1708  | 834   |
| BRA | Brazil | 10909 | Salete                       | 0.08 | 0.42 | 0.59 | 5414   | 2857  | 1587  |
| BRA | Brazil | 10910 | Saltinho                     | 0.25 | 0.66 | 0.89 | 2122   | 530   | 0     |
| BRA | Brazil | 10911 | Salto Veloso                 | 0.08 | 0.40 | 0.55 | 3333   | 1839  | 1143  |
| BRA | Brazil | 10912 | Sangao                       | 0.08 | 0.42 | 0.58 | 8612   | 4589  | 2633  |
| BRA | Brazil | 10913 | Santa Cecilia                | 0.08 | 0.40 | 0.55 | 12164  | 6711  | 4171  |
| BRA | Brazil | 10914 | Santa Helena                 | 0.17 | 0.49 | 0.65 | 1485   | 726   | 354   |
| BRA | Brazil | 10915 | Santa Rosa De Lima           | 0.08 | 0.40 | 0.55 | 1530   | 844   | 525   |
| BRA | Brazil | 10916 | Santa Rosa Do Sul            | 0.08 | 0.40 | 0.55 | 6257   | 3452  | 2145  |
| BRA | Brazil | 10917 | Santa Terezinha              | 0.08 | 0.40 | 0.55 | 6579   | 3630  | 2256  |
| BRA | Brazil | 10918 | Santa Terezinha Do Progresso | 0.66 | 0.85 | 0.97 | 371    | 0     | 0     |
| BRA | Brazil | 10919 | Santiago Do Sul              | 0.08 | 0.40 | 0.55 | 1049   | 579   | 360   |
| BRA | Brazil | 10920 | Santo Amaro Da Imperatriz    | 0.08 | 0.42 | 0.59 | 17309  | 9115  | 5037  |
| BRA | Brazil | 10921 | Sao Bento Do Sul             | 0.08 | 0.40 | 0.55 | 59000  | 32552 | 20229 |
| BRA | Brazil | 10922 | Sao Bernardino               | 0.27 | 0.67 | 0.93 | 1702   | 419   | 0     |
| BRA | Brazil | 10923 | Sao Bonifacio                | 0.08 | 0.42 | 0.59 | 2106   | 1115  | 622   |
| BRA | Brazil | 10924 | Sao Carlos                   | 1.00 | 1.00 | 1.00 | 0      | 0     | 0     |
| BRA | Brazil | 10925 | Sao Cristovao Do Sul         | 0.18 | 0.54 | 0.73 | 3371   | 1418  | 401   |
| BRA | Brazil | 10926 | Sao Domingos                 | 0.17 | 0.49 | 0.65 | 6145   | 3003  | 1466  |
| BRA | Brazil | 10927 | Sao Francisco Do Sul         | 0.08 | 0.46 | 0.69 | 46337  | 21871 | 7371  |
| BRA | Brazil | 10928 | Sao Joao Batista             | 0.08 | 0.40 | 0.55 | 26007  | 14349 | 8917  |
| BRA | Brazil | 10929 | Sao Joao Do Itaperiu         | 0.08 | 0.40 | 0.55 | 2670   | 1473  | 915   |
| BRA | Brazil | 10930 | Sao Joao Do Oeste            | 0.17 | 0.49 | 0.65 | 3974   | 1942  | 948   |
| BRA | Brazil | 10931 | Sao Joao Do Sul              | 0.08 | 0.42 | 0.59 | 5336   | 2809  | 1552  |
| BRA | Brazil | 10932 | Sao Joaquim                  | 0.08 | 0.40 | 0.55 | 19117  | 10547 | 6555  |
| BRA | Brazil | 10933 | Sao Jose                     | 0.08 | 0.43 | 0.61 | 175780 | 90408 | 46607 |
| BRA | Brazil | 10934 | Sao Jose Do Cedro            | 0.58 | 0.84 | 0.98 | 3033   | 0     | 0     |
| BRA | Brazil | 10935 | Sao Jose Do Cerrito          | 0.81 | 0.90 | 0.96 | 0      | 0     | 0     |

|     |        |       |                         |      |      |      |       |       |       |
|-----|--------|-------|-------------------------|------|------|------|-------|-------|-------|
| BRA | Brazil | 10936 | Sao Lourenco Do Oeste   | 0.17 | 0.49 | 0.65 | 14232 | 6954  | 3395  |
| BRA | Brazil | 10937 | Sao Ludgero             | 0.08 | 0.40 | 0.55 | 10316 | 5692  | 3537  |
| BRA | Brazil | 10938 | Sao Martinho            | 0.08 | 0.40 | 0.55 | 2495  | 1376  | 855   |
| BRA | Brazil | 10939 | Sao Miguel D'oeste      | 0.17 | 0.49 | 0.65 | 25021 | 12226 | 5969  |
| BRA | Brazil | 10940 | Sao Miguel Da Boa Vista | 0.59 | 0.82 | 0.95 | 408   | 0     | 0     |
| BRA | Brazil | 10941 | Sao Pedro De Alcantara  | 0.08 | 0.42 | 0.58 | 4283  | 2271  | 1314  |
| BRA | Brazil | 10942 | Saudades                | 0.08 | 0.40 | 0.55 | 6882  | 3797  | 2360  |
| BRA | Brazil | 10943 | Schroeder               | 0.08 | 0.43 | 0.62 | 13091 | 6644  | 3300  |
| BRA | Brazil | 10944 | Seara                   | 0.21 | 0.67 | 0.89 | 10427 | 2262  | 0     |
| BRA | Brazil | 10945 | Serra Alta              | 0.08 | 0.40 | 0.55 | 2485  | 1371  | 852   |
| BRA | Brazil | 10946 | Sideropolis             | 0.08 | 0.40 | 0.55 | 10452 | 5767  | 3584  |
| BRA | Brazil | 10947 | Sombrio                 | 0.08 | 0.43 | 0.62 | 21500 | 10892 | 5341  |
| BRA | Brazil | 10948 | Sul Brasil              | 0.08 | 0.40 | 0.55 | 1746  | 963   | 599   |
| BRA | Brazil | 10949 | Taio                    | 0.08 | 0.42 | 0.60 | 13578 | 7111  | 3846  |
| BRA | Brazil | 10950 | Tangara                 | 0.08 | 0.40 | 0.55 | 11275 | 6220  | 3866  |
| BRA | Brazil | 10951 | Tigrinhos               | 0.08 | 0.40 | 0.55 | 1265  | 698   | 434   |
| BRA | Brazil | 10952 | Tijucas                 | 0.08 | 0.40 | 0.55 | 25381 | 14003 | 8702  |
| BRA | Brazil | 10953 | Timbe Do Sul            | 0.08 | 0.40 | 0.55 | 3910  | 2157  | 1341  |
| BRA | Brazil | 10954 | Timbo                   | 0.08 | 0.43 | 0.62 | 31278 | 15858 | 7844  |
| BRA | Brazil | 10955 | Timbo Grande            | 0.23 | 0.59 | 0.78 | 4224  | 1548  | 127   |
| BRA | Brazil | 10956 | Tres Barras             | 0.08 | 0.40 | 0.55 | 13355 | 7369  | 4579  |
| BRA | Brazil | 10957 | Treviso                 | 0.08 | 0.40 | 0.55 | 2773  | 1530  | 951   |
| BRA | Brazil | 10958 | Treze De Maio           | 0.08 | 0.41 | 0.58 | 5598  | 2990  | 1710  |
| BRA | Brazil | 10959 | Treze Tiliás            | 0.08 | 0.40 | 0.55 | 5309  | 2929  | 1820  |
| BRA | Brazil | 10960 | Trombudo Central        | 0.08 | 0.40 | 0.55 | 5041  | 2781  | 1728  |
| BRA | Brazil | 10961 | Tubarao                 | 0.08 | 0.43 | 0.62 | 75717 | 38652 | 19235 |
| BRA | Brazil | 10962 | Tunapolis               | 0.17 | 0.49 | 0.65 | 3012  | 1472  | 719   |
| BRA | Brazil | 10963 | Turvo                   | 0.08 | 0.40 | 0.55 | 9315  | 5139  | 3194  |
| BRA | Brazil | 10964 | Uniao Do Oeste          | 0.22 | 0.65 | 0.88 | 1561  | 413   | 0     |
| BRA | Brazil | 10965 | Urubici                 | 0.16 | 0.51 | 0.69 | 7256  | 3276  | 1265  |
| BRA | Brazil | 10966 | Urupema                 | 0.08 | 0.40 | 0.55 | 1695  | 935   | 581   |
| BRA | Brazil | 10967 | Urussanga               | 0.08 | 0.44 | 0.63 | 15028 | 7551  | 3512  |
| BRA | Brazil | 10968 | Vargeao                 | 0.25 | 0.70 | 0.94 | 1853  | 326   | 0     |



|     |        |       |                        |      |      |      |        |       |       |
|-----|--------|-------|------------------------|------|------|------|--------|-------|-------|
| BRA | Brazil | 10969 | Vargem                 | 0.42 | 0.82 | 0.96 | 1099   | 0     | 0     |
| BRA | Brazil | 10970 | Vargem Bonita          | 0.08 | 0.40 | 0.55 | 3471   | 1915  | 1190  |
| BRA | Brazil | 10971 | Vidal Ramos            | 0.08 | 0.43 | 0.62 | 4718   | 2398  | 1158  |
| BRA | Brazil | 10972 | Videira                | 0.08 | 0.40 | 0.55 | 37486  | 20682 | 12853 |
| BRA | Brazil | 10973 | Vitor Meireles         | 0.08 | 0.40 | 0.55 | 4394   | 2424  | 1507  |
| BRA | Brazil | 10974 | Witmarsum              | 0.08 | 0.43 | 0.61 | 2479   | 1280  | 661   |
| BRA | Brazil | 10975 | Xanxere                | 0.17 | 0.58 | 0.83 | 31372  | 10967 | 0     |
| BRA | Brazil | 10976 | Xavantina              | 0.36 | 0.72 | 0.94 | 1809   | 315   | 0     |
| BRA | Brazil | 10977 | Xaxim                  | 0.18 | 0.67 | 0.90 | 17596  | 3800  | 0     |
| BRA | Brazil | 10978 | Zortea                 | 0.17 | 0.49 | 0.65 | 2105   | 1028  | 502   |
| BRA | Brazil | 10979 | Adamantina             | 0.31 | 0.79 | 0.97 | 16787  | 393   | 0     |
| BRA | Brazil | 10980 | Adolfo                 | 0.72 | 0.90 | 0.98 | 303    | 0     | 0     |
| BRA | Brazil | 10981 | Aguai                  | 0.09 | 0.47 | 0.68 | 25236  | 11715 | 4408  |
| BRA | Brazil | 10982 | Aguas Da Prata         | 0.17 | 0.49 | 0.65 | 5016   | 2451  | 1197  |
| BRA | Brazil | 10983 | Aguas De Lindoia       | 0.17 | 0.52 | 0.70 | 11592  | 5243  | 1843  |
| BRA | Brazil | 10984 | Aguas De Santa Barbara | 0.17 | 0.49 | 0.65 | 3761   | 1838  | 897   |
| BRA | Brazil | 10985 | Aguas De Sao Pedro     | 0.09 | 0.55 | 0.77 | 1361   | 482   | 60    |
| BRA | Brazil | 10986 | Agudos                 | 0.17 | 0.49 | 0.65 | 23174  | 11324 | 5529  |
| BRA | Brazil | 10987 | Alambari               | 0.55 | 0.82 | 0.97 | 1453   | 0     | 0     |
| BRA | Brazil | 10988 | Alfredo Marcondes      | 0.40 | 0.87 | 0.97 | 1634   | 0     | 0     |
| BRA | Brazil | 10989 | Altair                 | 0.39 | 0.83 | 0.98 | 1681   | 0     | 0     |
| BRA | Brazil | 10990 | Altinopolis            | 0.35 | 0.77 | 0.98 | 7231   | 455   | 0     |
| BRA | Brazil | 10991 | Alto Alegre            | 0.17 | 0.49 | 0.65 | 2613   | 1277  | 623   |
| BRA | Brazil | 10992 | Aluminio               | 0.21 | 0.59 | 0.83 | 10437  | 3671  | 0     |
| BRA | Brazil | 10993 | Alvares Florence       | 0.49 | 0.85 | 0.97 | 1190   | 0     | 0     |
| BRA | Brazil | 10994 | Alvares Machado        | 0.36 | 0.82 | 1.00 | 11064  | 0     | 0     |
| BRA | Brazil | 10995 | Alvaro De Carvalho     | 0.31 | 0.70 | 0.93 | 2456   | 513   | 0     |
| BRA | Brazil | 10996 | Alvinlandia            | 0.08 | 0.40 | 0.55 | 2293   | 1265  | 786   |
| BRA | Brazil | 10997 | Americana              | 0.08 | 0.44 | 0.63 | 156982 | 78483 | 37317 |
| BRA | Brazil | 10998 | Americo Brasiliense    | 0.72 | 0.90 | 1.00 | 3031   | 0     | 0     |
| BRA | Brazil | 10999 | Americo De Campos      | 0.17 | 0.49 | 0.65 | 3739   | 1827  | 892   |
| BRA | Brazil | 11000 | Amparo                 | 0.08 | 0.40 | 0.55 | 51124  | 28207 | 17529 |
| BRA | Brazil | 11001 | Analandia              | 0.13 | 0.53 | 0.78 | 3278   | 1320  | 76    |

|     |        |       |                    |      |      |      |        |       |       |
|-----|--------|-------|--------------------|------|------|------|--------|-------|-------|
| BRA | Brazil | 11002 | Andradina          | 0.38 | 0.82 | 0.99 | 24294  | 0     | 0     |
| BRA | Brazil | 11003 | Angatuba           | 0.95 | 0.98 | 1.00 | 0      | 0     | 0     |
| BRA | Brazil | 11004 | Anhembi            | 0.67 | 0.86 | 1.00 | 829    | 0     | 0     |
| BRA | Brazil | 11005 | Anhumas            | 0.17 | 0.49 | 0.65 | 2576   | 1259  | 614   |
| BRA | Brazil | 11006 | Aparecida          | 0.08 | 0.40 | 0.55 | 26246  | 14481 | 8999  |
| BRA | Brazil | 11007 | Aparecida D'oeste  | 0.42 | 0.86 | 0.97 | 1638   | 0     | 0     |
| BRA | Brazil | 11008 | Apiai              | 0.17 | 0.49 | 0.65 | 15747  | 7695  | 3757  |
| BRA | Brazil | 11009 | Aracariгуama       | 0.14 | 0.51 | 0.76 | 14361  | 6286  | 917   |
| BRA | Brazil | 11010 | Aracatuba          | 0.17 | 0.49 | 0.65 | 121954 | 59591 | 29095 |
| BRA | Brazil | 11011 | Aracoiaba Da Serra | 0.25 | 0.57 | 0.81 | 17898  | 7335  | 0     |
| BRA | Brazil | 11012 | Aramina            | 0.30 | 0.71 | 0.96 | 2755   | 491   | 0     |
| BRA | Brazil | 11013 | Arandu             | 0.17 | 0.49 | 0.65 | 4078   | 1993  | 973   |
| BRA | Brazil | 11014 | Arapei             | 0.08 | 0.40 | 0.55 | 1732   | 956   | 594   |
| BRA | Brazil | 11015 | Araraquara         | 0.17 | 0.49 | 0.65 | 147343 | 71998 | 35153 |
| BRA | Brazil | 11016 | Araras             | 0.08 | 0.46 | 0.67 | 94450  | 45075 | 17267 |
| BRA | Brazil | 11017 | Arco-iris          | 0.37 | 0.85 | 0.99 | 801    | 0     | 0     |
| BRA | Brazil | 11018 | Arealva            | 0.17 | 0.49 | 0.65 | 5283   | 2582  | 1260  |
| BRA | Brazil | 11019 | Areias             | 0.08 | 0.40 | 0.55 | 2788   | 1537  | 954   |
| BRA | Brazil | 11020 | Areiopolis         | 0.80 | 0.92 | 1.00 | 0      | 0     | 0     |
| BRA | Brazil | 11021 | Ariranha           | 0.17 | 0.49 | 0.65 | 5949   | 2907  | 1419  |
| BRA | Brazil | 11022 | Artur Nogueira     | 0.08 | 0.40 | 0.55 | 38058  | 20997 | 13049 |
| BRA | Brazil | 11023 | Aruja              | 0.08 | 0.43 | 0.61 | 66835  | 34241 | 17710 |
| BRA | Brazil | 11024 | Aspasia            | 0.37 | 0.81 | 0.96 | 793    | 0     | 0     |
| BRA | Brazil | 11025 | Assis              | 0.08 | 0.40 | 0.55 | 73983  | 40818 | 25366 |
| BRA | Brazil | 11026 | Atibaia            | 0.08 | 0.43 | 0.61 | 100099 | 51006 | 25874 |
| BRA | Brazil | 11027 | Auriflama          | 0.38 | 0.75 | 0.95 | 6378   | 804   | 0     |
| BRA | Brazil | 11028 | Avai               | 0.41 | 0.78 | 0.99 | 2082   | 81    | 0     |
| BRA | Brazil | 11029 | Avanhandava        | 0.30 | 0.72 | 0.95 | 6683   | 1034  | 0     |
| BRA | Brazil | 11030 | Avare              | 0.94 | 0.96 | 0.99 | 0      | 0     | 0     |
| BRA | Brazil | 11031 | Bady Bassitt       | 0.53 | 0.83 | 0.97 | 4513   | 0     | 0     |
| BRA | Brazil | 11032 | Balbinos           | 0.25 | 0.62 | 0.85 | 3656   | 1176  | 0     |
| BRA | Brazil | 11033 | Balsamo            | 0.17 | 0.49 | 0.65 | 5597   | 2735  | 1335  |
| BRA | Brazil | 11034 | Bananal            | 0.08 | 0.42 | 0.59 | 7824   | 4115  | 2255  |

|     |        |       |                        |      |      |      |        |       |       |
|-----|--------|-------|------------------------|------|------|------|--------|-------|-------|
| BRA | Brazil | 11035 | Barao De Antonina      | 0.75 | 0.89 | 0.97 | 177    | 0     | 0     |
| BRA | Brazil | 11036 | Barbosa                | 0.50 | 0.86 | 0.99 | 2196   | 0     | 0     |
| BRA | Brazil | 11037 | Bariri                 | 0.31 | 0.72 | 0.96 | 17013  | 2657  | 0     |
| BRA | Brazil | 11038 | Barra Bonita           | 0.17 | 0.49 | 0.65 | 23058  | 11267 | 5501  |
| BRA | Brazil | 11039 | Barra Do Chapeu        | 0.17 | 0.49 | 0.65 | 3523   | 1722  | 841   |
| BRA | Brazil | 11040 | Barra Do Turvo         | 0.10 | 0.45 | 0.63 | 5161   | 2554  | 1237  |
| BRA | Brazil | 11041 | Barretos               | 0.33 | 0.78 | 0.98 | 56981  | 1939  | 0     |
| BRA | Brazil | 11042 | Barrinha               | 0.17 | 0.49 | 0.65 | 19845  | 9697  | 4734  |
| BRA | Brazil | 11043 | Barueri                | 0.08 | 0.45 | 0.66 | 188822 | 90955 | 37473 |
| BRA | Brazil | 11044 | Bastos                 | 0.39 | 0.87 | 1.00 | 8634   | 0     | 0     |
| BRA | Brazil | 11045 | Batatais               | 0.33 | 0.75 | 0.98 | 28903  | 2879  | 0     |
| BRA | Brazil | 11046 | Bauru                  | 0.28 | 0.70 | 0.95 | 192009 | 36330 | 0     |
| BRA | Brazil | 11047 | Bebedouro              | 0.37 | 0.79 | 0.98 | 33206  | 1018  | 0     |
| BRA | Brazil | 11048 | Bento De Abreu         | 0.41 | 0.82 | 0.98 | 1145   | 0     | 0     |
| BRA | Brazil | 11049 | Bernardino De Campos   | 0.17 | 0.49 | 0.65 | 7029   | 3435  | 1677  |
| BRA | Brazil | 11050 | Bertioga               | 0.08 | 0.42 | 0.59 | 44418  | 23330 | 13058 |
| BRA | Brazil | 11051 | Bilac                  | 0.41 | 0.80 | 0.97 | 3067   | 33    | 0     |
| BRA | Brazil | 11052 | Birigui                | 0.17 | 0.49 | 0.65 | 74425  | 36367 | 17756 |
| BRA | Brazil | 11053 | Biritiba-mirim         | 0.08 | 0.42 | 0.58 | 22976  | 12186 | 6905  |
| BRA | Brazil | 11054 | Boa Esperanca Do Sul   | 0.30 | 0.76 | 0.98 | 7370   | 529   | 0     |
| BRA | Brazil | 11055 | Bocaina                | 0.17 | 0.49 | 0.65 | 7579   | 3704  | 1808  |
| BRA | Brazil | 11056 | Bofete                 | 0.17 | 0.49 | 0.65 | 7039   | 3439  | 1679  |
| BRA | Brazil | 11057 | Boituva                | 0.08 | 0.40 | 0.55 | 42937  | 23689 | 14722 |
| BRA | Brazil | 11058 | Bom Jesus Dos Perdoes  | 0.08 | 0.42 | 0.59 | 17888  | 9389  | 5196  |
| BRA | Brazil | 11059 | Bom Sucesso De Itarare | 0.64 | 0.83 | 0.99 | 624    | 0     | 0     |
| BRA | Brazil | 11060 | Bora                   | 0.82 | 0.90 | 0.95 | 0      | 0     | 0     |
| BRA | Brazil | 11061 | Boraceia               | 0.46 | 0.84 | 0.99 | 1603   | 0     | 0     |
| BRA | Brazil | 11062 | Borborema              | 0.17 | 0.49 | 0.65 | 9925   | 4850  | 2368  |
| BRA | Brazil | 11063 | Borebi                 | 0.57 | 0.80 | 0.97 | 582    | 3     | 0     |
| BRA | Brazil | 11064 | Botucatu               | 0.17 | 0.49 | 0.65 | 89704  | 43833 | 21401 |
| BRA | Brazil | 11065 | Braganca Paulista      | 0.08 | 0.43 | 0.60 | 118631 | 61491 | 32688 |
| BRA | Brazil | 11066 | Brauna                 | 0.42 | 0.87 | 0.99 | 2112   | 0     | 0     |
| BRA | Brazil | 11067 | Brejo Alegre           | 0.78 | 0.90 | 0.97 | 62     | 0     | 0     |

|     |        |       |                         |      |      |      |        |        |        |
|-----|--------|-------|-------------------------|------|------|------|--------|--------|--------|
| BRA | Brazil | 11068 | Brodosqui               | 0.36 | 0.75 | 0.98 | 10618  | 1140   | 0      |
| BRA | Brazil | 11069 | Brotas                  | 0.56 | 0.81 | 0.97 | 5835   | 0      | 0      |
| BRA | Brazil | 11070 | Buri                    | 0.96 | 0.98 | 1.00 | 0      | 0      | 0      |
| BRA | Brazil | 11071 | Buritama                | 0.33 | 0.77 | 0.98 | 7859   | 428    | 0      |
| BRA | Brazil | 11072 | Buritizal               | 0.31 | 0.79 | 0.97 | 2130   | 62     | 0      |
| BRA | Brazil | 11073 | Cabralia Paulista       | 0.17 | 0.49 | 0.65 | 2757   | 1347   | 658    |
| BRA | Brazil | 11074 | Cabreuva                | 0.08 | 0.40 | 0.55 | 34714  | 19152  | 11902  |
| BRA | Brazil | 11075 | Cacapava                | 0.08 | 0.40 | 0.55 | 66792  | 36851  | 22901  |
| BRA | Brazil | 11076 | Cachoeira Paulista      | 0.17 | 0.51 | 0.68 | 20529  | 9569   | 3890   |
| BRA | Brazil | 11077 | Caconde                 | 0.33 | 0.65 | 0.89 | 8975   | 2893   | 0      |
| BRA | Brazil | 11078 | Cafelandia              | 0.17 | 0.49 | 0.65 | 11069  | 5409   | 2641   |
| BRA | Brazil | 11079 | Caiabu                  | 0.17 | 0.49 | 0.65 | 2660   | 1300   | 635    |
| BRA | Brazil | 11080 | Caieiras                | 0.08 | 0.42 | 0.58 | 65939  | 35229  | 20343  |
| BRA | Brazil | 11081 | Caiua                   | 0.17 | 0.49 | 0.65 | 3539   | 1729   | 844    |
| BRA | Brazil | 11082 | Cajamar                 | 0.08 | 0.40 | 0.55 | 48665  | 26850  | 16686  |
| BRA | Brazil | 11083 | Cajati                  | 0.08 | 0.41 | 0.58 | 20679  | 11050  | 6369   |
| BRA | Brazil | 11084 | Cajobi                  | 0.33 | 0.81 | 0.97 | 4833   | 0      | 0      |
| BRA | Brazil | 11085 | Cajuru                  | 0.32 | 0.75 | 0.99 | 12311  | 1153   | 0      |
| BRA | Brazil | 11086 | Campina Do Monte Alegre | 0.17 | 0.49 | 0.65 | 3563   | 1741   | 850    |
| BRA | Brazil | 11087 | Campinas                | 0.08 | 0.40 | 0.55 | 859465 | 474189 | 294682 |
| BRA | Brazil | 11088 | Campo Limpo Paulista    | 0.08 | 0.40 | 0.55 | 59494  | 32825  | 20399  |
| BRA | Brazil | 11089 | Campos Do Jordao        | 0.17 | 0.52 | 0.70 | 32184  | 14559  | 5099   |
| BRA | Brazil | 11090 | Campos Novos Paulista   | 0.08 | 0.40 | 0.55 | 3525   | 1945   | 1209   |
| BRA | Brazil | 11091 | Cananeia                | 0.08 | 0.40 | 0.55 | 9196   | 5074   | 3153   |
| BRA | Brazil | 11092 | Canas                   | 0.08 | 0.40 | 0.55 | 3540   | 1953   | 1214   |
| BRA | Brazil | 11093 | Candido Mota            | 0.22 | 0.69 | 0.92 | 18171  | 3295   | 0      |
| BRA | Brazil | 11094 | Candido Rodrigues       | 0.38 | 0.74 | 0.94 | 1158   | 166    | 0      |
| BRA | Brazil | 11095 | Canitar                 | 0.55 | 0.82 | 0.99 | 1286   | 0      | 0      |
| BRA | Brazil | 11096 | Capao Bonito            | 0.17 | 0.49 | 0.65 | 30007  | 14663  | 7159   |
| BRA | Brazil | 11097 | Capela Do Alto          | 0.08 | 0.40 | 0.55 | 14435  | 7964   | 4949   |
| BRA | Brazil | 11098 | Capivari                | 0.08 | 0.40 | 0.55 | 38429  | 21202  | 13176  |
| BRA | Brazil | 11099 | Caraguatatuba           | 0.08 | 0.40 | 0.55 | 83151  | 45877  | 28510  |
| BRA | Brazil | 11100 | Carapicuiaba            | 0.08 | 0.42 | 0.58 | 277892 | 146639 | 83113  |

|     |        |       |                      |      |      |      |        |        |       |
|-----|--------|-------|----------------------|------|------|------|--------|--------|-------|
| BRA | Brazil | 11101 | Cardoso              | 0.40 | 0.80 | 0.98 | 4949   | 0      | 0     |
| BRA | Brazil | 11102 | Casa Branca          | 0.10 | 0.49 | 0.70 | 20936  | 9316   | 3124  |
| BRA | Brazil | 11103 | Cassia Dos Coqueiros | 0.53 | 0.87 | 0.99 | 713    | 0      | 0     |
| BRA | Brazil | 11104 | Castilho             | 0.38 | 0.86 | 0.99 | 8510   | 0      | 0     |
| BRA | Brazil | 11105 | Catanduva            | 0.41 | 0.81 | 0.98 | 47436  | 0      | 0     |
| BRA | Brazil | 11106 | Catigua              | 0.43 | 0.83 | 0.98 | 2857   | 0      | 0     |
| BRA | Brazil | 11107 | Cedral               | 0.17 | 0.49 | 0.65 | 5679   | 2775   | 1355  |
| BRA | Brazil | 11108 | Cerqueira Cesar      | 0.17 | 0.49 | 0.65 | 12251  | 5986   | 2923  |
| BRA | Brazil | 11109 | Cerquilha            | 0.08 | 0.47 | 0.70 | 33919  | 15484  | 4920  |
| BRA | Brazil | 11110 | Cesario Lange        | 0.08 | 0.40 | 0.55 | 12554  | 6927   | 4304  |
| BRA | Brazil | 11111 | Charqueada           | 0.08 | 0.43 | 0.61 | 11846  | 6084   | 3151  |
| BRA | Brazil | 11112 | Chavantes            | 0.93 | 0.97 | 1.00 | 0      | 0      | 0     |
| BRA | Brazil | 11113 | Clementina           | 0.39 | 0.87 | 0.99 | 3423   | 0      | 0     |
| BRA | Brazil | 11114 | Colina               | 0.34 | 0.83 | 0.99 | 8423   | 0      | 0     |
| BRA | Brazil | 11115 | Colombia             | 0.17 | 0.49 | 0.65 | 3868   | 1890   | 923   |
| BRA | Brazil | 11116 | Conchal              | 0.09 | 0.47 | 0.70 | 19549  | 8999   | 2788  |
| BRA | Brazil | 11117 | Conchas              | 0.08 | 0.40 | 0.55 | 12676  | 6994   | 4346  |
| BRA | Brazil | 11118 | Cordeiropolis        | 0.11 | 0.49 | 0.72 | 16396  | 7285   | 1795  |
| BRA | Brazil | 11119 | Coroados             | 0.29 | 0.68 | 0.92 | 4536   | 1019   | 0     |
| BRA | Brazil | 11120 | Coronel Macedo       | 0.17 | 0.49 | 0.65 | 3158   | 1543   | 754   |
| BRA | Brazil | 11121 | Corumbatai           | 0.08 | 0.40 | 0.55 | 2941   | 1623   | 1008  |
| BRA | Brazil | 11122 | Cosmopolis           | 0.08 | 0.44 | 0.62 | 50836  | 25648  | 12399 |
| BRA | Brazil | 11123 | Cosmorama            | 0.17 | 0.49 | 0.65 | 4619   | 2257   | 1102  |
| BRA | Brazil | 11124 | Cotia                | 0.08 | 0.42 | 0.59 | 179296 | 93805  | 51861 |
| BRA | Brazil | 11125 | Cravinhos            | 0.68 | 0.89 | 1.00 | 4181   | 0      | 0     |
| BRA | Brazil | 11126 | Cristais Paulista    | 0.31 | 0.77 | 0.99 | 4576   | 260    | 0     |
| BRA | Brazil | 11127 | Cruzalia             | 0.17 | 0.49 | 0.65 | 1379   | 674    | 329   |
| BRA | Brazil | 11128 | Cruzeiro             | 0.17 | 0.49 | 0.65 | 50952  | 24897  | 12156 |
| BRA | Brazil | 11129 | Cubatao              | 0.08 | 0.40 | 0.55 | 90003  | 49657  | 30859 |
| BRA | Brazil | 11130 | Cunha                | 0.08 | 0.40 | 0.56 | 15794  | 8664   | 5307  |
| BRA | Brazil | 11131 | Descalvado           | 0.17 | 0.49 | 0.65 | 20947  | 10236  | 4997  |
| BRA | Brazil | 11132 | Diadema              | 0.08 | 0.42 | 0.59 | 293329 | 153284 | 84313 |
| BRA | Brazil | 11133 | Dirce Reis           | 0.50 | 0.83 | 0.96 | 514    | 0      | 0     |

|     |        |       |                            |      |      |      |        |        |       |
|-----|--------|-------|----------------------------|------|------|------|--------|--------|-------|
| BRA | Brazil | 11134 | Divinolandia               | 0.37 | 0.64 | 0.83 | 4813   | 1830   | 0     |
| BRA | Brazil | 11135 | Dobrada                    | 0.39 | 0.80 | 1.00 | 3624   | 2      | 0     |
| BRA | Brazil | 11136 | Dois Corregos              | 0.38 | 0.78 | 0.99 | 11265  | 656    | 0     |
| BRA | Brazil | 11137 | Dolcinopolis               | 0.47 | 0.83 | 0.95 | 718    | 0      | 0     |
| BRA | Brazil | 11138 | Dourado                    | 0.34 | 0.68 | 0.91 | 4077   | 1074   | 0     |
| BRA | Brazil | 11139 | Dracena                    | 0.34 | 0.78 | 0.97 | 21293  | 851    | 0     |
| BRA | Brazil | 11140 | Duartina                   | 0.39 | 0.76 | 0.97 | 5182   | 529    | 0     |
| BRA | Brazil | 11141 | Dumont                     | 0.34 | 0.80 | 0.98 | 4418   | 23     | 0     |
| BRA | Brazil | 11142 | Echapora                   | 0.08 | 0.40 | 0.55 | 4527   | 2498   | 1552  |
| BRA | Brazil | 11143 | Eldorado                   | 0.17 | 0.49 | 0.65 | 9741   | 4760   | 2324  |
| BRA | Brazil | 11144 | Elias Fausto               | 0.08 | 0.43 | 0.60 | 12669  | 6555   | 3441  |
| BRA | Brazil | 11145 | Elisiario                  | 0.52 | 0.85 | 0.98 | 1006   | 0      | 0     |
| BRA | Brazil | 11146 | Embauba                    | 0.17 | 0.49 | 0.65 | 1558   | 761    | 372   |
| BRA | Brazil | 11147 | Embu                       | 0.08 | 0.40 | 0.55 | 199162 | 109883 | 68286 |
| BRA | Brazil | 11148 | Embu-guacu                 | 0.08 | 0.42 | 0.58 | 48154  | 25579  | 14635 |
| BRA | Brazil | 11149 | Emilianopolis              | 0.17 | 0.49 | 0.65 | 2008   | 981    | 479   |
| BRA | Brazil | 11150 | Engenheiro Coelho          | 0.11 | 0.52 | 0.76 | 13846  | 5567   | 863   |
| BRA | Brazil | 11151 | Espirito Santo Do Pinhal   | 0.20 | 0.59 | 0.83 | 26588  | 9342   | 0     |
| BRA | Brazil | 11152 | Espirito Santo Do Turvo    | 0.55 | 0.88 | 1.00 | 1167   | 0      | 0     |
| BRA | Brazil | 11153 | Estiva Gerbi               | 0.09 | 0.46 | 0.68 | 7711   | 3617   | 1328  |
| BRA | Brazil | 11154 | Estrela D'oeste            | 0.50 | 0.84 | 0.97 | 2529   | 0      | 0     |
| BRA | Brazil | 11155 | Estrela Do Norte           | 0.17 | 0.49 | 0.65 | 1738   | 849    | 415   |
| BRA | Brazil | 11156 | Euclides Da Cunha Paulista | 0.34 | 0.82 | 0.99 | 4394   | 0      | 0     |
| BRA | Brazil | 11157 | Fatura                     | 0.95 | 0.97 | 0.99 | 0      | 0      | 0     |
| BRA | Brazil | 11158 | Fernando Prestes           | 0.56 | 0.85 | 0.98 | 1334   | 0      | 0     |
| BRA | Brazil | 11159 | Fernandopolis              | 0.41 | 0.80 | 0.96 | 26993  | 0      | 0     |
| BRA | Brazil | 11160 | Fernao                     | 0.17 | 0.49 | 0.65 | 1047   | 512    | 250   |
| BRA | Brazil | 11161 | Ferraz De Vasconcelos      | 0.08 | 0.42 | 0.59 | 130588 | 68750  | 38488 |
| BRA | Brazil | 11162 | Flora Rica                 | 0.36 | 0.81 | 0.96 | 712    | 0      | 0     |
| BRA | Brazil | 11163 | Floreal                    | 0.36 | 0.73 | 0.93 | 1330   | 202    | 0     |
| BRA | Brazil | 11164 | Florida Paulista           | 0.32 | 0.79 | 0.96 | 6886   | 94     | 0     |
| BRA | Brazil | 11165 | Florinia                   | 0.32 | 0.74 | 0.93 | 1333   | 174    | 0     |
| BRA | Brazil | 11166 | Franca                     | 0.17 | 0.49 | 0.65 | 217963 | 106505 | 52001 |

|     |        |       |                  |      |      |      |        |        |        |
|-----|--------|-------|------------------|------|------|------|--------|--------|--------|
| BRA | Brazil | 11167 | Francisco Morato | 0.08 | 0.40 | 0.55 | 122612 | 67648  | 42040  |
| BRA | Brazil | 11168 | Franco Da Rocha  | 0.08 | 0.43 | 0.61 | 113045 | 58017  | 29619  |
| BRA | Brazil | 11169 | Gabriel Monteiro | 0.42 | 0.85 | 0.99 | 1045   | 0      | 0      |
| BRA | Brazil | 11170 | Galia            | 0.40 | 0.79 | 0.96 | 2774   | 35     | 0      |
| BRA | Brazil | 11171 | Garca            | 0.34 | 0.76 | 0.98 | 20434  | 1833   | 0      |
| BRA | Brazil | 11172 | Gastao Vidigal   | 0.51 | 0.86 | 0.98 | 1357   | 0      | 0      |
| BRA | Brazil | 11173 | Gaviao Peixoto   | 0.26 | 0.74 | 0.93 | 2509   | 284    | 0      |
| BRA | Brazil | 11174 | General Salgado  | 0.45 | 0.83 | 0.97 | 3775   | 0      | 0      |
| BRA | Brazil | 11175 | Getulina         | 0.42 | 0.78 | 0.95 | 4321   | 196    | 0      |
| BRA | Brazil | 11176 | Glicerio         | 0.60 | 0.87 | 0.98 | 959    | 0      | 0      |
| BRA | Brazil | 11177 | Guaicara         | 0.39 | 0.79 | 0.98 | 4757   | 81     | 0      |
| BRA | Brazil | 11178 | Guaimbe          | 0.70 | 0.89 | 0.99 | 593    | 0      | 0      |
| BRA | Brazil | 11179 | Guaira           | 0.17 | 0.49 | 0.65 | 25296  | 12361  | 6035   |
| BRA | Brazil | 11180 | Guapiacu         | 0.34 | 0.77 | 0.98 | 9373   | 655    | 0      |
| BRA | Brazil | 11181 | Guapiara         | 0.99 | 0.99 | 1.00 | 0      | 0      | 0      |
| BRA | Brazil | 11182 | Guara            | 0.33 | 0.80 | 0.99 | 9871   | 0      | 0      |
| BRA | Brazil | 11183 | Guaracai         | 0.40 | 0.82 | 0.96 | 3404   | 0      | 0      |
| BRA | Brazil | 11184 | Guaraci          | 0.17 | 0.49 | 0.65 | 6875   | 3360   | 1640   |
| BRA | Brazil | 11185 | Guarani D'oeste  | 0.34 | 0.79 | 0.96 | 938    | 12     | 0      |
| BRA | Brazil | 11186 | Guaranta         | 0.55 | 0.83 | 0.97 | 1637   | 0      | 0      |
| BRA | Brazil | 11187 | Guararapes       | 0.17 | 0.49 | 0.65 | 20496  | 10015  | 4890   |
| BRA | Brazil | 11188 | Guararema        | 0.08 | 0.40 | 0.55 | 20851  | 11504  | 7149   |
| BRA | Brazil | 11189 | Guaratingueta    | 0.17 | 0.55 | 0.79 | 75493  | 29373  | 700    |
| BRA | Brazil | 11190 | Guarei           | 0.82 | 0.89 | 0.95 | 0      | 0      | 0      |
| BRA | Brazil | 11191 | Guariba          | 0.17 | 0.49 | 0.65 | 24675  | 12057  | 5887   |
| BRA | Brazil | 11192 | Guaruja          | 0.08 | 0.40 | 0.55 | 223505 | 123313 | 76632  |
| BRA | Brazil | 11193 | Guarulhos        | 0.08 | 0.45 | 0.65 | 981658 | 480276 | 202561 |
| BRA | Brazil | 11194 | Guatapara        | 0.31 | 0.73 | 0.99 | 3606   | 538    | 0      |
| BRA | Brazil | 11195 | Guzolandia       | 0.42 | 0.79 | 0.98 | 2004   | 68     | 0      |
| BRA | Brazil | 11196 | Herculandia      | 0.17 | 0.49 | 0.65 | 5909   | 2887   | 1410   |
| BRA | Brazil | 11197 | Holambra         | 0.08 | 0.40 | 0.55 | 9502   | 5242   | 3258   |
| BRA | Brazil | 11198 | Hortolandia      | 0.08 | 0.42 | 0.60 | 151567 | 78888  | 43006  |
| BRA | Brazil | 11199 | Iacanga          | 0.28 | 0.70 | 0.95 | 5941   | 1110   | 0      |

|     |        |       |                  |      |      |      |        |       |       |
|-----|--------|-------|------------------|------|------|------|--------|-------|-------|
| BRA | Brazil | 11200 | Iacri            | 0.34 | 0.81 | 0.97 | 2977   | 0     | 0     |
| BRA | Brazil | 11201 | Iaras            | 0.53 | 0.77 | 0.94 | 2617   | 272   | 0     |
| BRA | Brazil | 11202 | Ibate            | 0.93 | 0.96 | 0.99 | 0      | 0     | 0     |
| BRA | Brazil | 11203 | Ibira            | 0.52 | 0.85 | 0.99 | 3431   | 0     | 0     |
| BRA | Brazil | 11204 | Ibirarema        | 0.35 | 0.68 | 0.88 | 3404   | 886   | 0     |
| BRA | Brazil | 11205 | Ibitinga         | 0.08 | 0.40 | 0.55 | 42296  | 23336 | 14502 |
| BRA | Brazil | 11206 | Ibiuna           | 0.55 | 0.75 | 0.90 | 19152  | 4115  | 0     |
| BRA | Brazil | 11207 | Icem             | 0.38 | 0.79 | 0.98 | 3415   | 73    | 0     |
| BRA | Brazil | 11208 | Iepe             | 0.37 | 0.84 | 0.99 | 3484   | 0     | 0     |
| BRA | Brazil | 11209 | Igaracu Do Tiete | 0.37 | 0.75 | 0.97 | 10378  | 1212  | 0     |
| BRA | Brazil | 11210 | Igarapava        | 0.17 | 0.49 | 0.65 | 19005  | 9287  | 4534  |
| BRA | Brazil | 11211 | Igarata          | 0.17 | 0.49 | 0.65 | 5906   | 2886  | 1409  |
| BRA | Brazil | 11212 | Iguape           | 0.08 | 0.40 | 0.55 | 22048  | 12165 | 7560  |
| BRA | Brazil | 11213 | Ilha Comprida    | 0.08 | 0.43 | 0.62 | 7472   | 3798  | 1888  |
| BRA | Brazil | 11214 | Ilha Solteira    | 0.17 | 0.49 | 0.65 | 16666  | 8144  | 3976  |
| BRA | Brazil | 11215 | Ilhabela         | 0.08 | 0.40 | 0.55 | 23045  | 12714 | 7901  |
| BRA | Brazil | 11216 | Indaiatuba       | 0.08 | 0.43 | 0.61 | 175859 | 90425 | 46988 |
| BRA | Brazil | 11217 | Indiana          | 0.37 | 0.83 | 0.98 | 2115   | 0     | 0     |
| BRA | Brazil | 11218 | Indiaporá        | 0.48 | 0.87 | 0.98 | 1252   | 0     | 0     |
| BRA | Brazil | 11219 | Inubia Paulista  | 0.36 | 0.83 | 0.98 | 1712   | 0     | 0     |
| BRA | Brazil | 11220 | Ipauçu           | 0.17 | 0.49 | 0.65 | 9304   | 4546  | 2220  |
| BRA | Brazil | 11221 | Ipero            | 0.08 | 0.40 | 0.55 | 25388  | 14007 | 8705  |
| BRA | Brazil | 11222 | Ipeuna           | 0.08 | 0.46 | 0.67 | 5261   | 2485  | 936   |
| BRA | Brazil | 11223 | Ipigua           | 0.17 | 0.49 | 0.65 | 3226   | 1577  | 770   |
| BRA | Brazil | 11224 | Iporanga         | 0.17 | 0.52 | 0.71 | 2825   | 1265  | 417   |
| BRA | Brazil | 11225 | Ipua             | 0.17 | 0.49 | 0.65 | 10045  | 4908  | 2396  |
| BRA | Brazil | 11226 | Iracemópolis     | 0.08 | 0.46 | 0.67 | 16894  | 7938  | 2973  |
| BRA | Brazil | 11227 | Irapua           | 0.55 | 0.85 | 0.99 | 2000   | 0     | 0     |
| BRA | Brazil | 11228 | Irapuru          | 0.75 | 0.91 | 0.97 | 388    | 0     | 0     |
| BRA | Brazil | 11229 | Itabera          | 0.95 | 0.96 | 0.96 | 0      | 0     | 0     |
| BRA | Brazil | 11230 | Itai             | 0.91 | 0.96 | 1.00 | 0      | 0     | 0     |
| BRA | Brazil | 11231 | Itajobi          | 0.46 | 0.80 | 0.96 | 5214   | 37    | 0     |
| BRA | Brazil | 11232 | Itaju            | 0.17 | 0.49 | 0.65 | 2349   | 1148  | 560   |



|     |        |       |                      |      |      |      |        |        |       |
|-----|--------|-------|----------------------|------|------|------|--------|--------|-------|
| BRA | Brazil | 11233 | Itanhaem             | 0.08 | 0.42 | 0.58 | 70952  | 37644  | 21429 |
| BRA | Brazil | 11234 | Itaoca               | 0.08 | 0.40 | 0.55 | 2520   | 1390   | 864   |
| BRA | Brazil | 11235 | Itapecerica Da Serra | 0.08 | 0.42 | 0.58 | 128784 | 68117  | 38372 |
| BRA | Brazil | 11236 | Itapetininga         | 0.67 | 0.84 | 0.96 | 20962  | 0      | 0     |
| BRA | Brazil | 11237 | Itapeva              | 0.17 | 0.49 | 0.65 | 58646  | 28656  | 13991 |
| BRA | Brazil | 11238 | Itapevi              | 0.08 | 0.41 | 0.57 | 173541 | 93691  | 55782 |
| BRA | Brazil | 11239 | Itapira              | 0.18 | 0.55 | 0.78 | 46115  | 18222  | 1556  |
| BRA | Brazil | 11240 | Itapirapua Paulista  | 0.39 | 0.69 | 0.93 | 1725   | 459    | 0     |
| BRA | Brazil | 11241 | Itapolis             | 0.36 | 0.73 | 0.96 | 18778  | 2862   | 0     |
| BRA | Brazil | 11242 | Itaporanga           | 0.17 | 0.49 | 0.65 | 9504   | 4644   | 2267  |
| BRA | Brazil | 11243 | Itapui               | 0.30 | 0.72 | 0.97 | 6850   | 1127   | 0     |
| BRA | Brazil | 11244 | Itapura              | 0.17 | 0.49 | 0.65 | 3027   | 1479   | 722   |
| BRA | Brazil | 11245 | Itaquaquecetuba      | 0.08 | 0.41 | 0.57 | 249677 | 133657 | 77880 |
| BRA | Brazil | 11246 | Itarare              | 0.17 | 0.49 | 0.65 | 31644  | 15462  | 7549  |
| BRA | Brazil | 11247 | Itariri              | 0.08 | 0.40 | 0.55 | 13972  | 7709   | 4790  |
| BRA | Brazil | 11248 | Itatiba              | 0.08 | 0.44 | 0.62 | 84508  | 42705  | 21043 |
| BRA | Brazil | 11249 | Itatinga             | 0.17 | 0.49 | 0.65 | 12717  | 6214   | 3034  |
| BRA | Brazil | 11250 | Itirapina            | 0.09 | 0.52 | 0.76 | 12501  | 4925   | 624   |
| BRA | Brazil | 11251 | Itirapua             | 0.35 | 0.78 | 0.99 | 2875   | 140    | 0     |
| BRA | Brazil | 11252 | Itobi                | 0.08 | 0.40 | 0.55 | 5689   | 3139   | 1950  |
| BRA | Brazil | 11253 | Itu                  | 0.08 | 0.40 | 0.55 | 122472 | 67571  | 41992 |
| BRA | Brazil | 11254 | Itupeva              | 0.08 | 0.42 | 0.59 | 43951  | 22962  | 12520 |
| BRA | Brazil | 11255 | Ituverava            | 0.35 | 0.77 | 0.98 | 18378  | 1080   | 0     |
| BRA | Brazil | 11256 | Jaborandi            | 0.17 | 0.49 | 0.65 | 4347   | 2124   | 1037  |
| BRA | Brazil | 11257 | Jaboticabal          | 0.17 | 0.49 | 0.65 | 48331  | 23617  | 11531 |
| BRA | Brazil | 11258 | Jacarei              | 0.08 | 0.43 | 0.60 | 167201 | 86592  | 46115 |
| BRA | Brazil | 11259 | Jaci                 | 0.17 | 0.49 | 0.65 | 4303   | 2102   | 1026  |
| BRA | Brazil | 11260 | Jacupiranga          | 0.08 | 0.40 | 0.55 | 12995  | 7170   | 4455  |
| BRA | Brazil | 11261 | Jaguariuna           | 0.08 | 0.43 | 0.61 | 40897  | 20848  | 10599 |
| BRA | Brazil | 11262 | Jales                | 0.17 | 0.49 | 0.65 | 30803  | 15052  | 7349  |
| BRA | Brazil | 11263 | Jambeiro             | 0.08 | 0.40 | 0.55 | 4647   | 2564   | 1593  |
| BRA | Brazil | 11264 | Jandira              | 0.08 | 0.42 | 0.58 | 91603  | 48591  | 27734 |
| BRA | Brazil | 11265 | Jardinopolis         | 0.17 | 0.49 | 0.65 | 27459  | 13418  | 6551  |

|     |        |       |                   |      |      |      |        |        |       |
|-----|--------|-------|-------------------|------|------|------|--------|--------|-------|
| BRA | Brazil | 11266 | Jarinu            | 0.08 | 0.42 | 0.60 | 21180  | 11047  | 6004  |
| BRA | Brazil | 11267 | Jau               | 0.26 | 0.66 | 0.91 | 78757  | 20824  | 0     |
| BRA | Brazil | 11268 | Jeriquara         | 0.17 | 0.49 | 0.65 | 2018   | 986    | 482   |
| BRA | Brazil | 11269 | Joanopolis        | 0.17 | 0.51 | 0.69 | 8224   | 3785   | 1476  |
| BRA | Brazil | 11270 | Joao Ramalho      | 0.59 | 0.89 | 0.99 | 972    | 0      | 0     |
| BRA | Brazil | 11271 | Jose Bonifacio    | 0.70 | 0.86 | 0.97 | 3725   | 0      | 0     |
| BRA | Brazil | 11272 | Julio Mesquita    | 0.17 | 0.49 | 0.65 | 2972   | 1452   | 709   |
| BRA | Brazil | 11273 | Jumirim           | 0.08 | 0.40 | 0.55 | 2390   | 1319   | 820   |
| BRA | Brazil | 11274 | Jundiai           | 0.08 | 0.44 | 0.64 | 296764 | 146541 | 66011 |
| BRA | Brazil | 11275 | Junqueiropolis    | 0.17 | 0.49 | 0.65 | 12785  | 6247   | 3050  |
| BRA | Brazil | 11276 | Juquia            | 0.08 | 0.40 | 0.55 | 14211  | 7841   | 4873  |
| BRA | Brazil | 11277 | Juquitiba         | 0.08 | 0.40 | 0.55 | 22449  | 12386  | 7697  |
| BRA | Brazil | 11278 | Lagoinha          | 0.08 | 0.43 | 0.61 | 3561   | 1833   | 949   |
| BRA | Brazil | 11279 | Laranjal Paulista | 0.75 | 0.89 | 1.00 | 1384   | 0      | 0     |
| BRA | Brazil | 11280 | Lavinia           | 0.17 | 0.49 | 0.65 | 7903   | 3862   | 1885  |
| BRA | Brazil | 11281 | Lavrinhas         | 0.17 | 0.49 | 0.65 | 4898   | 2393   | 1169  |
| BRA | Brazil | 11282 | Leme              | 0.10 | 0.50 | 0.73 | 70741  | 29801  | 6961  |
| BRA | Brazil | 11283 | Lencois Paulista  | 0.17 | 0.49 | 0.65 | 42223  | 20632  | 10073 |
| BRA | Brazil | 11284 | Limeira           | 0.08 | 0.40 | 0.55 | 217587 | 120048 | 74604 |
| BRA | Brazil | 11285 | Lindoiia          | 0.17 | 0.52 | 0.71 | 4912   | 2203   | 736   |
| BRA | Brazil | 11286 | Lins              | 0.17 | 0.49 | 0.65 | 48449  | 23674  | 11559 |
| BRA | Brazil | 11287 | Lorena            | 0.08 | 0.43 | 0.61 | 63276  | 32672  | 16981 |
| BRA | Brazil | 11288 | Lourdes           | 0.17 | 0.49 | 0.65 | 1423   | 695    | 340   |
| BRA | Brazil | 11289 | Louveira          | 0.08 | 0.43 | 0.60 | 33172  | 17249  | 9253  |
| BRA | Brazil | 11290 | Lucelia           | 0.34 | 0.81 | 0.99 | 9962   | 0      | 0     |
| BRA | Brazil | 11291 | Lucianopolis      | 0.44 | 0.79 | 0.96 | 854    | 29     | 0     |
| BRA | Brazil | 11292 | Luis Antonio      | 0.48 | 0.82 | 0.99 | 4649   | 0      | 0     |
| BRA | Brazil | 11293 | Luiziania         | 0.37 | 0.82 | 0.99 | 2442   | 0      | 0     |
| BRA | Brazil | 11294 | Lupercio          | 0.35 | 0.77 | 0.96 | 2042   | 152    | 0     |
| BRA | Brazil | 11295 | Lutecia           | 0.40 | 0.76 | 0.90 | 1097   | 122    | 0     |
| BRA | Brazil | 11296 | Macatuba          | 0.45 | 0.78 | 0.98 | 5925   | 380    | 0     |
| BRA | Brazil | 11297 | Macaubal          | 0.45 | 0.78 | 0.96 | 2854   | 130    | 0     |
| BRA | Brazil | 11298 | Macedonia         | 0.47 | 0.79 | 0.97 | 1218   | 19     | 0     |

|     |        |       |                         |      |      |      |        |        |       |
|-----|--------|-------|-------------------------|------|------|------|--------|--------|-------|
| BRA | Brazil | 11299 | Magda                   | 0.17 | 0.49 | 0.65 | 2020   | 987    | 482   |
| BRA | Brazil | 11300 | Mairinque               | 0.08 | 0.40 | 0.55 | 33784  | 18639  | 11583 |
| BRA | Brazil | 11301 | Mairipora               | 0.08 | 0.41 | 0.58 | 68902  | 36883  | 21399 |
| BRA | Brazil | 11302 | Manduri                 | 0.87 | 0.93 | 0.98 | 0      | 0      | 0     |
| BRA | Brazil | 11303 | Maraba Paulista         | 0.31 | 0.73 | 0.93 | 2781   | 422    | 0     |
| BRA | Brazil | 11304 | Maracai                 | 0.32 | 0.77 | 0.98 | 6708   | 352    | 0     |
| BRA | Brazil | 11305 | Marapoama               | 0.54 | 0.82 | 0.95 | 761    | 0      | 0     |
| BRA | Brazil | 11306 | Mariapolis              | 0.33 | 0.82 | 0.97 | 1900   | 0      | 0     |
| BRA | Brazil | 11307 | Marilia                 | 0.29 | 0.71 | 0.95 | 120645 | 20566  | 0     |
| BRA | Brazil | 11308 | Marinopolis             | 0.59 | 0.88 | 0.96 | 445    | 0      | 0     |
| BRA | Brazil | 11309 | Martinopolis            | 0.38 | 0.82 | 0.97 | 10963  | 0      | 0     |
| BRA | Brazil | 11310 | Matao                   | 0.17 | 0.49 | 0.65 | 51682  | 25254  | 12330 |
| BRA | Brazil | 11311 | Maua                    | 0.08 | 0.42 | 0.59 | 332917 | 174697 | 96736 |
| BRA | Brazil | 11312 | Mendonca                | 0.73 | 0.90 | 0.98 | 346    | 0      | 0     |
| BRA | Brazil | 11313 | Meridiano               | 0.51 | 0.86 | 0.98 | 1140   | 0      | 0     |
| BRA | Brazil | 11314 | Mesopolis               | 0.63 | 0.88 | 0.98 | 325    | 0      | 0     |
| BRA | Brazil | 11315 | Miguelopolis            | 0.40 | 0.78 | 0.98 | 8724   | 525    | 0     |
| BRA | Brazil | 11316 | Mineiros Do Tiete       | 0.17 | 0.49 | 0.65 | 8038   | 3928   | 1918  |
| BRA | Brazil | 11317 | Mira Estrela            | 0.45 | 0.82 | 0.96 | 1055   | 0      | 0     |
| BRA | Brazil | 11318 | Miracatu                | 0.08 | 0.43 | 0.60 | 14287  | 7323   | 3882  |
| BRA | Brazil | 11319 | Mirandopolis            | 0.43 | 0.85 | 0.98 | 10426  | 0      | 0     |
| BRA | Brazil | 11320 | Mirante Do Paranapanema | 0.36 | 0.77 | 0.97 | 7915   | 477    | 0     |
| BRA | Brazil | 11321 | Mirassol                | 0.38 | 0.76 | 0.97 | 24688  | 2107   | 0     |
| BRA | Brazil | 11322 | Mirassolandia           | 0.35 | 0.78 | 0.98 | 2124   | 115    | 0     |
| BRA | Brazil | 11323 | Mococa                  | 0.17 | 0.49 | 0.65 | 43332  | 21174  | 10338 |
| BRA | Brazil | 11324 | Moji Das Cruzes         | 0.08 | 0.43 | 0.60 | 332551 | 171723 | 90566 |
| BRA | Brazil | 11325 | Moji-guacu              | 0.10 | 0.49 | 0.71 | 102238 | 45882  | 12725 |
| BRA | Brazil | 11326 | Moji-mirim              | 0.08 | 0.40 | 0.55 | 68533  | 37811  | 23498 |
| BRA | Brazil | 11327 | Mombuca                 | 0.17 | 0.51 | 0.75 | 2189   | 999    | 171   |
| BRA | Brazil | 11328 | Moncoes                 | 0.17 | 0.49 | 0.65 | 1415   | 691    | 338   |
| BRA | Brazil | 11329 | Mongagua                | 0.08 | 0.40 | 0.55 | 39566  | 21829  | 13566 |
| BRA | Brazil | 11330 | Monte Alegre Do Sul     | 0.08 | 0.42 | 0.58 | 5546   | 2947   | 1673  |
| BRA | Brazil | 11331 | Monte Alto              | 0.37 | 0.78 | 0.97 | 21543  | 748    | 0     |

|     |        |       |                     |      |      |      |       |       |       |
|-----|--------|-------|---------------------|------|------|------|-------|-------|-------|
| BRA | Brazil | 11332 | Monte Aprazivel     | 0.38 | 0.80 | 0.97 | 10290 | 118   | 0     |
| BRA | Brazil | 11333 | Monte Azul Paulista | 0.35 | 0.77 | 0.97 | 8586  | 507   | 0     |
| BRA | Brazil | 11334 | Monte Castelo       | 0.17 | 0.49 | 0.65 | 2639  | 1289  | 630   |
| BRA | Brazil | 11335 | Monte Mor           | 0.08 | 0.42 | 0.58 | 45615 | 24197 | 13716 |
| BRA | Brazil | 11336 | Monteiro Lobato     | 0.17 | 0.49 | 0.65 | 2924  | 1429  | 698   |
| BRA | Brazil | 11337 | Morro Agudo         | 0.17 | 0.49 | 0.65 | 20278 | 9909  | 4838  |
| BRA | Brazil | 11338 | Morungaba           | 0.08 | 0.42 | 0.58 | 9835  | 5217  | 2959  |
| BRA | Brazil | 11339 | Motuca              | 0.25 | 0.64 | 0.90 | 2555  | 743   | 0     |
| BRA | Brazil | 11340 | Murutinga Do Sul    | 0.37 | 0.79 | 0.96 | 1881  | 36    | 0     |
| BRA | Brazil | 11341 | Nantes              | 0.40 | 0.86 | 0.99 | 1213  | 0     | 0     |
| BRA | Brazil | 11342 | Narandiba           | 0.17 | 0.49 | 0.65 | 2963  | 1448  | 707   |
| BRA | Brazil | 11343 | Natividade Da Serra | 0.08 | 0.40 | 0.55 | 4867  | 2685  | 1669  |
| BRA | Brazil | 11344 | Nazare Paulista     | 0.08 | 0.41 | 0.57 | 12904 | 6966  | 4127  |
| BRA | Brazil | 11345 | Neves Paulista      | 0.35 | 0.79 | 0.95 | 4103  | 79    | 0     |
| BRA | Brazil | 11346 | Nhandeara           | 0.32 | 0.74 | 0.94 | 5371  | 689   | 0     |
| BRA | Brazil | 11347 | Nipoa               | 0.33 | 0.83 | 0.99 | 2398  | 0     | 0     |
| BRA | Brazil | 11348 | Nova Alianca        | 0.51 | 0.82 | 0.96 | 1972  | 0     | 0     |
| BRA | Brazil | 11349 | Nova Campina        | 0.84 | 0.92 | 0.99 | 0     | 0     | 0     |
| BRA | Brazil | 11350 | Nova Canaa Paulista | 0.38 | 0.79 | 0.95 | 842   | 20    | 0     |
| BRA | Brazil | 11351 | Nova Castilho       | 0.33 | 0.71 | 0.95 | 582   | 111   | 0     |
| BRA | Brazil | 11352 | Nova Europa         | 0.41 | 0.80 | 0.97 | 4187  | 29    | 0     |
| BRA | Brazil | 11353 | Nova Granada        | 0.38 | 0.79 | 0.97 | 8850  | 164   | 0     |
| BRA | Brazil | 11354 | Nova Guataporanga   | 0.37 | 0.77 | 0.97 | 969   | 75    | 0     |
| BRA | Brazil | 11355 | Nova Independencia  | 0.40 | 0.86 | 0.98 | 1550  | 0     | 0     |
| BRA | Brazil | 11356 | Nova Luzitania      | 0.17 | 0.49 | 0.65 | 2492  | 1218  | 594   |
| BRA | Brazil | 11357 | Nova Odessa         | 0.08 | 0.42 | 0.59 | 48534 | 25570 | 14257 |
| BRA | Brazil | 11358 | Novais              | 0.46 | 0.86 | 0.99 | 1918  | 0     | 0     |
| BRA | Brazil | 11359 | Novo Horizonte      | 0.17 | 0.49 | 0.65 | 25287 | 12356 | 6033  |
| BRA | Brazil | 11360 | Nuporanga           | 0.33 | 0.80 | 0.97 | 3427  | 0     | 0     |
| BRA | Brazil | 11361 | Ocaucu              | 0.42 | 0.80 | 0.98 | 1625  | 0     | 0     |
| BRA | Brazil | 11362 | Oleo                | 0.97 | 0.98 | 0.99 | 0     | 0     | 0     |
| BRA | Brazil | 11363 | Olimpia             | 0.36 | 0.80 | 0.98 | 23567 | 90    | 0     |
| BRA | Brazil | 11364 | Onda Verde          | 0.34 | 0.80 | 0.98 | 2000  | 4     | 0     |

|     |        |       |                     |      |      |      |        |        |        |
|-----|--------|-------|---------------------|------|------|------|--------|--------|--------|
| BRA | Brazil | 11365 | Oriente             | 0.38 | 0.77 | 0.97 | 2691   | 166    | 0      |
| BRA | Brazil | 11366 | Orindiuva           | 0.37 | 0.80 | 0.98 | 2909   | 0      | 0      |
| BRA | Brazil | 11367 | Orlandia            | 0.17 | 0.49 | 0.65 | 27204  | 13293  | 6490   |
| BRA | Brazil | 11368 | Osasco              | 0.08 | 0.42 | 0.59 | 498136 | 260342 | 142027 |
| BRA | Brazil | 11369 | Oscar Bressane      | 0.29 | 0.71 | 0.90 | 1332   | 240    | 0      |
| BRA | Brazil | 11370 | Oswaldo Cruz        | 0.32 | 0.81 | 0.97 | 15640  | 0      | 0      |
| BRA | Brazil | 11371 | Ourinhos            | 0.29 | 0.72 | 0.97 | 56641  | 9397   | 0      |
| BRA | Brazil | 11372 | Ouro Verde          | 0.17 | 0.49 | 0.65 | 5293   | 2586   | 1263   |
| BRA | Brazil | 11373 | Ouroeste            | 0.35 | 0.80 | 0.98 | 4476   | 0      | 0      |
| BRA | Brazil | 11374 | Pacaembu            | 0.31 | 0.77 | 0.95 | 6812   | 358    | 0      |
| BRA | Brazil | 11375 | Palestina           | 0.17 | 0.49 | 0.65 | 7906   | 3863   | 1886   |
| BRA | Brazil | 11376 | Palmares Paulista   | 0.38 | 0.85 | 0.99 | 5213   | 0      | 0      |
| BRA | Brazil | 11377 | Palmeira D'oeste    | 0.38 | 0.78 | 0.95 | 3982   | 191    | 0      |
| BRA | Brazil | 11378 | Palmital            | 0.08 | 0.40 | 0.55 | 15999  | 8827   | 5485   |
| BRA | Brazil | 11379 | Panorama            | 0.42 | 0.84 | 1.00 | 5855   | 0      | 0      |
| BRA | Brazil | 11380 | Paraguacu Paulista  | 0.17 | 0.49 | 0.65 | 28379  | 13867  | 6771   |
| BRA | Brazil | 11381 | Paraibuna           | 0.08 | 0.42 | 0.59 | 13084  | 6871   | 3767   |
| BRA | Brazil | 11382 | Paraiso             | 0.17 | 0.49 | 0.65 | 4288   | 2095   | 1023   |
| BRA | Brazil | 11383 | Paranapanema        | 0.98 | 0.99 | 1.00 | 0      | 0      | 0      |
| BRA | Brazil | 11384 | Paranapua           | 0.43 | 0.84 | 0.98 | 1492   | 0      | 0      |
| BRA | Brazil | 11385 | Parapua             | 0.30 | 0.79 | 0.97 | 5536   | 75     | 0      |
| BRA | Brazil | 11386 | Pardinho            | 0.17 | 0.49 | 0.65 | 3944   | 1927   | 941    |
| BRA | Brazil | 11387 | Pariquera-acu       | 0.08 | 0.43 | 0.61 | 13895  | 7065   | 3653   |
| BRA | Brazil | 11388 | Parisi              | 0.48 | 0.88 | 0.99 | 681    | 0      | 0      |
| BRA | Brazil | 11389 | Patrocinio Paulista | 0.32 | 0.74 | 0.99 | 6932   | 814    | 0      |
| BRA | Brazil | 11390 | Pauliceia           | 0.17 | 0.49 | 0.65 | 4497   | 2198   | 1073   |
| BRA | Brazil | 11391 | Paulinia            | 0.08 | 0.43 | 0.62 | 76029  | 38624  | 19291  |
| BRA | Brazil | 11392 | Paulistania         | 0.61 | 0.83 | 0.98 | 346    | 0      | 0      |
| BRA | Brazil | 11393 | Paulo De Faria      | 0.48 | 0.80 | 0.98 | 2893   | 15     | 0      |
| BRA | Brazil | 11394 | Pederneiras         | 0.17 | 0.49 | 0.65 | 28831  | 14088  | 6878   |
| BRA | Brazil | 11395 | Pedra Bela          | 0.17 | 0.50 | 0.66 | 4115   | 1982   | 919    |
| BRA | Brazil | 11396 | Pedranopolis        | 0.35 | 0.78 | 0.94 | 1152   | 54     | 0      |
| BRA | Brazil | 11397 | Pedregulho          | 0.17 | 0.49 | 0.65 | 10394  | 5079   | 2480   |

|     |        |       |                       |      |      |      |        |        |       |
|-----|--------|-------|-----------------------|------|------|------|--------|--------|-------|
| BRA | Brazil | 11398 | Pedreira              | 0.08 | 0.42 | 0.58 | 33479  | 17859  | 10239 |
| BRA | Brazil | 11399 | Pedrinhas Paulista    | 0.17 | 0.49 | 0.65 | 1935   | 945    | 462   |
| BRA | Brazil | 11400 | Pedro De Toledo       | 0.08 | 0.42 | 0.59 | 8077   | 4241   | 2328  |
| BRA | Brazil | 11401 | Penapolis             | 0.31 | 0.76 | 0.98 | 30609  | 2219   | 0     |
| BRA | Brazil | 11402 | Pereira Barreto       | 0.35 | 0.79 | 0.98 | 11592  | 295    | 0     |
| BRA | Brazil | 11403 | Pereiras              | 0.08 | 0.40 | 0.55 | 6154   | 3395   | 2110  |
| BRA | Brazil | 11404 | Peruibe               | 0.08 | 0.42 | 0.59 | 46207  | 24224  | 13308 |
| BRA | Brazil | 11405 | Piacatu               | 0.17 | 0.49 | 0.65 | 3671   | 1794   | 876   |
| BRA | Brazil | 11406 | Piedade               | 0.08 | 0.40 | 0.55 | 39889  | 22008  | 13677 |
| BRA | Brazil | 11407 | Pilar Do Sul          | 0.17 | 0.49 | 0.65 | 18046  | 8818   | 4305  |
| BRA | Brazil | 11408 | Pindamonhangaba       | 0.17 | 0.52 | 0.70 | 102289 | 46048  | 15783 |
| BRA | Brazil | 11409 | Pindorama             | 0.17 | 0.49 | 0.65 | 10336  | 5051   | 2466  |
| BRA | Brazil | 11410 | Pinhalzinho           | 0.08 | 0.40 | 0.55 | 10710  | 5909   | 3672  |
| BRA | Brazil | 11411 | Piquerobi             | 0.17 | 0.49 | 0.65 | 2322   | 1135   | 554   |
| BRA | Brazil | 11412 | Piquete               | 0.17 | 0.49 | 0.65 | 8894   | 4346   | 2122  |
| BRA | Brazil | 11413 | Piracaia              | 0.17 | 0.49 | 0.65 | 16944  | 8280   | 4042  |
| BRA | Brazil | 11414 | Piracicaba            | 0.08 | 0.46 | 0.67 | 284384 | 134288 | 52111 |
| BRA | Brazil | 11415 | Piraju                | 0.96 | 0.98 | 0.99 | 0      | 0      | 0     |
| BRA | Brazil | 11416 | Pirajui               | 0.32 | 0.76 | 0.95 | 12049  | 934    | 0     |
| BRA | Brazil | 11417 | Pirangi               | 0.17 | 0.49 | 0.65 | 7110   | 3474   | 1696  |
| BRA | Brazil | 11418 | Pirapora Do Bom Jesus | 0.08 | 0.43 | 0.61 | 13467  | 6874   | 3563  |
| BRA | Brazil | 11419 | Pirapozinho           | 0.17 | 0.49 | 0.65 | 17086  | 8349   | 4076  |
| BRA | Brazil | 11420 | Pirassununga          | 0.20 | 0.62 | 0.85 | 45335  | 13680  | 0     |
| BRA | Brazil | 11421 | Piratininga           | 0.31 | 0.74 | 0.96 | 6575   | 831    | 0     |
| BRA | Brazil | 11422 | Pitangueiras          | 0.17 | 0.49 | 0.65 | 24427  | 11936  | 5828  |
| BRA | Brazil | 11423 | Planalto              | 0.17 | 0.49 | 0.65 | 3209   | 1568   | 766   |
| BRA | Brazil | 11424 | Platina               | 0.08 | 0.40 | 0.55 | 2514   | 1387   | 862   |
| BRA | Brazil | 11425 | Poa                   | 0.08 | 0.43 | 0.61 | 84057  | 42909  | 22176 |
| BRA | Brazil | 11426 | Poloni                | 0.53 | 0.86 | 0.98 | 1579   | 0      | 0     |
| BRA | Brazil | 11427 | Pompeia               | 0.29 | 0.73 | 0.95 | 11054  | 1516   | 0     |
| BRA | Brazil | 11428 | Pongai                | 0.53 | 0.81 | 0.97 | 942    | 0      | 0     |
| BRA | Brazil | 11429 | Pontal                | 0.38 | 0.79 | 0.99 | 20441  | 570    | 0     |
| BRA | Brazil | 11430 | Pontalinda            | 0.58 | 0.85 | 0.98 | 1014   | 0      | 0     |

|     |        |       |                      |      |      |      |        |        |       |
|-----|--------|-------|----------------------|------|------|------|--------|--------|-------|
| BRA | Brazil | 11431 | Pontes Gestal        | 0.34 | 0.80 | 0.99 | 1206   | 0      | 0     |
| BRA | Brazil | 11432 | Populina             | 0.35 | 0.84 | 0.98 | 1885   | 0      | 0     |
| BRA | Brazil | 11433 | Porangaba            | 0.17 | 0.49 | 0.65 | 6032   | 2947   | 1439  |
| BRA | Brazil | 11434 | Porto Feliz          | 0.08 | 0.45 | 0.64 | 37522  | 18514  | 8514  |
| BRA | Brazil | 11435 | Porto Ferreira       | 0.17 | 0.49 | 0.65 | 34794  | 17001  | 8301  |
| BRA | Brazil | 11436 | Potim                | 0.08 | 0.40 | 0.55 | 17010  | 9383   | 5829  |
| BRA | Brazil | 11437 | Potirendaba          | 0.54 | 0.83 | 0.98 | 4427   | 0      | 0     |
| BRA | Brazil | 11438 | Pracinha             | 0.31 | 0.70 | 0.90 | 2060   | 416    | 0     |
| BRA | Brazil | 11439 | Pradopolis           | 0.17 | 0.49 | 0.65 | 13075  | 6389   | 3119  |
| BRA | Brazil | 11440 | Praia Grande         | 0.08 | 0.40 | 0.55 | 225863 | 124615 | 77441 |
| BRA | Brazil | 11441 | Pratania             | 0.90 | 0.96 | 1.00 | 0      | 0      | 0     |
| BRA | Brazil | 11442 | Presidente Alves     | 0.59 | 0.81 | 0.97 | 865    | 0      | 0     |
| BRA | Brazil | 11443 | Presidente Bernardes | 0.17 | 0.49 | 0.65 | 8485   | 4146   | 2024  |
| BRA | Brazil | 11444 | Presidente Epitacio  | 0.37 | 0.81 | 1.00 | 18912  | 0      | 0     |
| BRA | Brazil | 11445 | Presidente Prudente  | 0.77 | 0.92 | 0.99 | 6325   | 0      | 0     |
| BRA | Brazil | 11446 | Presidente Venceslau | 0.35 | 0.79 | 0.98 | 17635  | 440    | 0     |
| BRA | Brazil | 11447 | Promissao            | 0.32 | 0.77 | 0.97 | 18736  | 1175   | 0     |
| BRA | Brazil | 11448 | Quadra               | 0.96 | 0.97 | 0.98 | 0      | 0      | 0     |
| BRA | Brazil | 11449 | Quata                | 0.47 | 0.83 | 0.98 | 4528   | 0      | 0     |
| BRA | Brazil | 11450 | Queiroz              | 0.17 | 0.49 | 0.65 | 2075   | 1014   | 495   |
| BRA | Brazil | 11451 | Queluz               | 0.17 | 0.50 | 0.67 | 8165   | 3858   | 1660  |
| BRA | Brazil | 11452 | Quintana             | 0.17 | 0.49 | 0.65 | 4103   | 2005   | 979   |
| BRA | Brazil | 11453 | Rafard               | 0.10 | 0.49 | 0.72 | 7028   | 3095   | 766   |
| BRA | Brazil | 11454 | Rancharia            | 0.17 | 0.49 | 0.65 | 18744  | 9159   | 4472  |
| BRA | Brazil | 11455 | Redencao Da Serra    | 0.08 | 0.41 | 0.57 | 2886   | 1558   | 919   |
| BRA | Brazil | 11456 | Regente Feijo        | 0.41 | 0.81 | 0.98 | 7767   | 0      | 0     |
| BRA | Brazil | 11457 | Reginopolis          | 0.17 | 0.49 | 0.65 | 5912   | 2889   | 1410  |
| BRA | Brazil | 11458 | Registro             | 0.08 | 0.43 | 0.60 | 40613  | 21050  | 11263 |
| BRA | Brazil | 11459 | Restinga             | 0.33 | 0.75 | 0.98 | 3491   | 401    | 0     |
| BRA | Brazil | 11460 | Ribeira              | 0.73 | 0.86 | 0.98 | 266    | 0      | 0     |
| BRA | Brazil | 11461 | Ribeirao Bonito      | 0.22 | 0.66 | 0.92 | 7583   | 1884   | 0     |
| BRA | Brazil | 11462 | Ribeirao Branco      | 0.99 | 0.99 | 1.00 | 0      | 0      | 0     |
| BRA | Brazil | 11463 | Ribeirao Corrente    | 0.35 | 0.83 | 0.99 | 2107   | 0      | 0     |

|     |        |       |                       |      |      |      |        |       |       |
|-----|--------|-------|-----------------------|------|------|------|--------|-------|-------|
| BRA | Brazil | 11464 | Ribeirao Do Sul       | 0.62 | 0.83 | 0.97 | 742    | 0     | 0     |
| BRA | Brazil | 11465 | Ribeirao Dos Indios   | 0.18 | 0.54 | 0.75 | 13017  | 5424  | 1085  |
| BRA | Brazil | 11466 | Ribeirao Grande       | 0.17 | 0.49 | 0.65 | 4727   | 2310  | 1128  |
| BRA | Brazil | 11467 | Ribeirao Pires        | 0.08 | 0.42 | 0.59 | 101615 | 53272 | 29227 |
| BRA | Brazil | 11468 | Ribeirao Preto        | 0.34 | 0.78 | 0.98 | 312129 | 15200 | 0     |
| BRA | Brazil | 11469 | Rifaina               | 0.40 | 0.80 | 0.99 | 1450   | 3     | 0     |
| BRA | Brazil | 11470 | Rincao                | 0.76 | 0.90 | 0.99 | 400    | 0     | 0     |
| BRA | Brazil | 11471 | Rinopolis             | 0.17 | 0.49 | 0.65 | 6363   | 3109  | 1518  |
| BRA | Brazil | 11472 | Rio Claro             | 0.08 | 0.40 | 0.55 | 148317 | 81830 | 50853 |
| BRA | Brazil | 11473 | Rio Das Pedras        | 0.08 | 0.40 | 0.55 | 25375  | 14000 | 8700  |
| BRA | Brazil | 11474 | Rio Grande Da Serra   | 0.08 | 0.42 | 0.59 | 33874  | 17765 | 9972  |
| BRA | Brazil | 11475 | Riolandia             | 0.43 | 0.79 | 0.98 | 4528   | 168   | 0     |
| BRA | Brazil | 11476 | Riversul              | 0.78 | 0.89 | 0.99 | 119    | 0     | 0     |
| BRA | Brazil | 11477 | Rosana                | 0.17 | 0.49 | 0.65 | 11543  | 5640  | 2754  |
| BRA | Brazil | 11478 | Roseira               | 0.08 | 0.40 | 0.55 | 7721   | 4255  | 2638  |
| BRA | Brazil | 11479 | Rubiacea              | 0.35 | 0.79 | 0.98 | 1369   | 18    | 0     |
| BRA | Brazil | 11480 | Rubineia              | 0.35 | 0.77 | 0.95 | 1388   | 83    | 0     |
| BRA | Brazil | 11481 | Sabino                | 0.28 | 0.67 | 0.94 | 2889   | 704   | 0     |
| BRA | Brazil | 11482 | Sagres                | 0.30 | 0.79 | 0.97 | 1224   | 22    | 0     |
| BRA | Brazil | 11483 | Sales                 | 0.89 | 0.95 | 0.98 | 0      | 0     | 0     |
| BRA | Brazil | 11484 | Sales Oliveira        | 0.17 | 0.49 | 0.65 | 7303   | 3568  | 1742  |
| BRA | Brazil | 11485 | Salesopolis           | 0.08 | 0.43 | 0.61 | 11993  | 6115  | 3079  |
| BRA | Brazil | 11486 | Salmourao             | 0.17 | 0.49 | 0.65 | 3274   | 1600  | 781   |
| BRA | Brazil | 11487 | Saltinho              | 0.08 | 0.40 | 0.55 | 5127   | 2829  | 1758  |
| BRA | Brazil | 11488 | Salto                 | 0.08 | 0.40 | 0.55 | 83574  | 46110 | 28655 |
| BRA | Brazil | 11489 | Salto De Pirapora     | 0.19 | 0.54 | 0.78 | 26836  | 11360 | 1026  |
| BRA | Brazil | 11490 | Salto Grande          | 0.49 | 0.78 | 0.97 | 2884   | 147   | 0     |
| BRA | Brazil | 11491 | Sandovalina           | 0.47 | 0.85 | 0.99 | 1386   | 0     | 0     |
| BRA | Brazil | 11492 | Santa Adelia          | 0.39 | 0.80 | 0.97 | 6310   | 50    | 0     |
| BRA | Brazil | 11493 | Santa Albertina       | 0.17 | 0.49 | 0.65 | 3770   | 1842  | 899   |
| BRA | Brazil | 11494 | Santa Barbara D'oeste | 0.08 | 0.40 | 0.55 | 145102 | 80057 | 49751 |
| BRA | Brazil | 11495 | Santa Branca          | 0.08 | 0.43 | 0.61 | 10515  | 5419  | 2813  |
| BRA | Brazil | 11496 | Santa Clara D'oeste   | 0.17 | 0.49 | 0.65 | 1347   | 658   | 321   |



|     |        |       |                            |      |      |      |        |        |        |
|-----|--------|-------|----------------------------|------|------|------|--------|--------|--------|
| BRA | Brazil | 11497 | Santa Cruz Da Conceicao    | 0.66 | 0.76 | 0.85 | 618    | 153    | 0      |
| BRA | Brazil | 11498 | Santa Cruz Da Esperanca    | 0.41 | 0.78 | 0.98 | 849    | 54     | 0      |
| BRA | Brazil | 11499 | Santa Cruz Das Palmeiras   | 0.19 | 0.67 | 0.87 | 20561  | 4269   | 0      |
| BRA | Brazil | 11500 | Santa Cruz Do Rio Pardo    | 0.36 | 0.76 | 0.98 | 20798  | 2046   | 0      |
| BRA | Brazil | 11501 | Santa Ernestina            | 0.46 | 0.76 | 0.97 | 1899   | 202    | 0      |
| BRA | Brazil | 11502 | Santa Fe Do Sul            | 0.17 | 0.49 | 0.65 | 19962  | 9754   | 4762   |
| BRA | Brazil | 11503 | Santa Gertrudes            | 0.08 | 0.40 | 0.55 | 16682  | 9204   | 5720   |
| BRA | Brazil | 11504 | Santa Isabel               | 0.08 | 0.40 | 0.55 | 40931  | 22582  | 14034  |
| BRA | Brazil | 11505 | Santa Lucia                | 0.17 | 0.49 | 0.65 | 5511   | 2693   | 1315   |
| BRA | Brazil | 11506 | Santa Maria Da Serra       | 0.10 | 0.52 | 0.76 | 4219   | 1680   | 248    |
| BRA | Brazil | 11507 | Santa Mercedes             | 0.47 | 0.88 | 1.00 | 975    | 0      | 0      |
| BRA | Brazil | 11508 | Santa Rita D'oeste         | 0.37 | 0.82 | 0.95 | 1099   | 0      | 0      |
| BRA | Brazil | 11509 | Santa Rita Do Passa Quatro | 0.76 | 0.86 | 0.95 | 1162   | 0      | 0      |
| BRA | Brazil | 11510 | Santa Rosa De Viterbo      | 0.38 | 0.81 | 0.99 | 10993  | 0      | 0      |
| BRA | Brazil | 11511 | Santa Salete               | 0.47 | 0.85 | 0.96 | 498    | 0      | 0      |
| BRA | Brazil | 11512 | Santana Da Ponte Pensa     | 0.17 | 0.49 | 0.65 | 1003   | 490    | 239    |
| BRA | Brazil | 11513 | Santana De Parnaiba        | 0.08 | 0.42 | 0.59 | 107285 | 55883  | 30525  |
| BRA | Brazil | 11514 | Santo Anastacio            | 0.17 | 0.49 | 0.65 | 1417   | 692    | 338    |
| BRA | Brazil | 11515 | Santo Andre                | 0.08 | 0.40 | 0.55 | 519157 | 286432 | 178002 |
| BRA | Brazil | 11516 | Santo Antonio Da Alegria   | 0.17 | 0.49 | 0.65 | 4242   | 2073   | 1012   |
| BRA | Brazil | 11517 | Santo Antonio De Posse     | 0.08 | 0.43 | 0.60 | 16561  | 8600   | 4609   |
| BRA | Brazil | 11518 | Santo Antonio Do Aracangua | 0.39 | 0.80 | 0.99 | 3423   | 38     | 0      |
| BRA | Brazil | 11519 | Santo Antonio Do Jardim    | 0.17 | 0.49 | 0.65 | 3803   | 1858   | 907    |
| BRA | Brazil | 11520 | Santo Antonio Do Pinhal    | 0.17 | 0.49 | 0.65 | 4195   | 2050   | 1001   |
| BRA | Brazil | 11521 | Santo Exedito              | 0.40 | 0.82 | 0.98 | 1214   | 0      | 0      |
| BRA | Brazil | 11522 | Santopolis Do Aguapei      | 0.17 | 0.49 | 0.65 | 2948   | 1441   | 703    |
| BRA | Brazil | 11523 | Santos                     | 0.08 | 0.40 | 0.55 | 306400 | 169049 | 105054 |
| BRA | Brazil | 11524 | Sao Bento Do Sapucaí       | 0.17 | 0.49 | 0.65 | 6885   | 3364   | 1643   |
| BRA | Brazil | 11525 | Sao Bernardo Do Campo      | 0.08 | 0.40 | 0.55 | 600491 | 331306 | 205889 |
| BRA | Brazil | 11526 | Sao Caetano Do Sul         | 0.08 | 0.51 | 0.75 | 119691 | 48923  | 8592   |
| BRA | Brazil | 11527 | Sao Carlos                 | 0.17 | 0.49 | 0.65 | 154767 | 75625  | 36924  |
| BRA | Brazil | 11528 | Sao Francisco              | 0.17 | 0.49 | 0.65 | 1778   | 869    | 424    |
| BRA | Brazil | 11529 | Sao Joao Da Boa Vista      | 0.18 | 0.58 | 0.82 | 55831  | 20116  | 0      |

|     |        |       |                          |      |      |      |         |         |         |
|-----|--------|-------|--------------------------|------|------|------|---------|---------|---------|
| BRA | Brazil | 11530 | Sao Joao Das Duas Pontes | 0.70 | 0.87 | 0.96 | 260     | 0       | 0       |
| BRA | Brazil | 11531 | Sao Joao De Iracema      | 0.37 | 0.87 | 0.98 | 808     | 0       | 0       |
| BRA | Brazil | 11532 | Sao Joao Do Pau D'alho   | 0.35 | 0.83 | 0.98 | 948     | 0       | 0       |
| BRA | Brazil | 11533 | Sao Joaquim Da Barra     | 0.34 | 0.77 | 0.98 | 23513   | 1283    | 0       |
| BRA | Brazil | 11534 | Sao Jose Da Bela Vista   | 0.17 | 0.49 | 0.65 | 5592    | 2732    | 1334    |
| BRA | Brazil | 11535 | Sao Jose Do Barreiro     | 0.08 | 0.40 | 0.55 | 3058    | 1685    | 1044    |
| BRA | Brazil | 11536 | Sao Jose Do Rio Pardo    | 0.17 | 0.54 | 0.74 | 34113   | 14417   | 3383    |
| BRA | Brazil | 11537 | Sao Jose Do Rio Preto    | 0.17 | 0.49 | 0.65 | 283233  | 138399  | 67573   |
| BRA | Brazil | 11538 | Sao Jose Dos Campos      | 0.17 | 0.49 | 0.65 | 440218  | 215108  | 105025  |
| BRA | Brazil | 11539 | Sao Lourenco Da Serra    | 0.08 | 0.40 | 0.55 | 11229   | 6196    | 3850    |
| BRA | Brazil | 11540 | Sao Luis Do Paraitinga   | 0.08 | 0.42 | 0.59 | 7708    | 4072    | 2266    |
| BRA | Brazil | 11541 | Sao Manuel               | 0.52 | 0.78 | 0.97 | 11523   | 811     | 0       |
| BRA | Brazil | 11542 | Sao Miguel Arcanjo       | 0.17 | 0.49 | 0.65 | 20571   | 10052   | 4908    |
| BRA | Brazil | 11543 | Sao Paulo                | 0.08 | 0.40 | 0.55 | 8666559 | 4781559 | 2971477 |
| BRA | Brazil | 11544 | Sao Pedro                | 0.08 | 0.40 | 0.55 | 26156   | 14431   | 8968    |
| BRA | Brazil | 11545 | Sao Pedro Do Turvo       | 0.08 | 0.40 | 0.55 | 5620    | 3100    | 1927    |
| BRA | Brazil | 11546 | Sao Roque                | 0.08 | 0.40 | 0.55 | 65137   | 35937   | 22333   |
| BRA | Brazil | 11547 | Sao Sebastiao            | 0.08 | 0.40 | 0.55 | 61872   | 34137   | 21214   |
| BRA | Brazil | 11548 | Sao Sebastiao Da Grama   | 0.34 | 0.62 | 0.83 | 5671    | 2166    | 0       |
| BRA | Brazil | 11549 | Sao Simao                | 0.17 | 0.49 | 0.65 | 9560    | 4671    | 2281    |
| BRA | Brazil | 11550 | Sao Vicente              | 0.08 | 0.40 | 0.55 | 268340  | 148050  | 92005   |
| BRA | Brazil | 11551 | Sarapui                  | 0.77 | 0.88 | 0.98 | 344     | 0       | 0       |
| BRA | Brazil | 11552 | Sarutaia                 | 0.99 | 0.99 | 0.99 | 0       | 0       | 0       |
| BRA | Brazil | 11553 | Sebastianopolis Do Sul   | 0.45 | 0.81 | 0.96 | 1224    | 0       | 0       |
| BRA | Brazil | 11554 | Serra Azul               | 0.29 | 0.72 | 0.96 | 7152    | 1056    | 0       |
| BRA | Brazil | 11555 | Serra Negra              | 0.17 | 0.51 | 0.69 | 18066   | 8280    | 3125    |
| BRA | Brazil | 11556 | Serrana                  | 0.17 | 0.49 | 0.65 | 27673   | 13522   | 6602    |
| BRA | Brazil | 11557 | Sertaozinho              | 0.17 | 0.49 | 0.65 | 77317   | 37780   | 18446   |
| BRA | Brazil | 11558 | Sete Barras              | 0.17 | 0.51 | 0.68 | 8179    | 3810    | 1559    |
| BRA | Brazil | 11559 | Severinia                | 0.17 | 0.49 | 0.65 | 10801   | 5278    | 2577    |
| BRA | Brazil | 11560 | Silveiras                | 0.08 | 0.40 | 0.55 | 4471    | 2467    | 1533    |
| BRA | Brazil | 11561 | Socorro                  | 0.17 | 0.49 | 0.65 | 25245   | 12336   | 6023    |
| BRA | Brazil | 11562 | Sorocaba                 | 0.08 | 0.46 | 0.66 | 477143  | 228055  | 92397   |

|     |        |       |                 |      |      |      |        |        |       |
|-----|--------|-------|-----------------|------|------|------|--------|--------|-------|
| BRA | Brazil | 11563 | Sud Menucci     | 0.17 | 0.49 | 0.65 | 4807   | 2349   | 1147  |
| BRA | Brazil | 11564 | Sumare          | 0.08 | 0.40 | 0.55 | 192258 | 106074 | 65919 |
| BRA | Brazil | 11565 | Suzanapolis     | 0.37 | 0.77 | 0.97 | 1637   | 109    | 0     |
| BRA | Brazil | 11566 | Suzano          | 0.08 | 0.43 | 0.60 | 193838 | 100627 | 54050 |
| BRA | Brazil | 11567 | Tabapua         | 0.75 | 0.90 | 0.99 | 651    | 0      | 0     |
| BRA | Brazil | 11568 | Tabatinga       | 0.17 | 0.49 | 0.65 | 10152  | 4961   | 2422  |
| BRA | Brazil | 11569 | Taboao Da Serra | 0.08 | 0.41 | 0.57 | 198771 | 106727 | 62624 |
| BRA | Brazil | 11570 | Taciba          | 0.40 | 0.85 | 0.99 | 2472   | 0      | 0     |
| BRA | Brazil | 11571 | Taguai          | 0.86 | 0.93 | 1.00 | 0      | 0      | 0     |
| BRA | Brazil | 11572 | Taiacu          | 0.30 | 0.74 | 0.98 | 3123   | 353    | 0     |
| BRA | Brazil | 11573 | Taiuva          | 0.38 | 0.81 | 0.96 | 2326   | 0      | 0     |
| BRA | Brazil | 11574 | Tambau          | 0.24 | 0.60 | 0.85 | 13088  | 4613   | 0     |
| BRA | Brazil | 11575 | Tanabi          | 0.17 | 0.49 | 0.65 | 16162  | 7897   | 3856  |
| BRA | Brazil | 11576 | Tapirai         | 0.17 | 0.49 | 0.65 | 5052   | 2468   | 1205  |
| BRA | Brazil | 11577 | Tapiratiba      | 0.27 | 0.62 | 0.86 | 6876   | 2355   | 0     |
| BRA | Brazil | 11578 | Taquaral        | 0.35 | 0.81 | 0.98 | 1270   | 0      | 0     |
| BRA | Brazil | 11579 | Taquaritinga    | 0.38 | 0.77 | 0.99 | 23933  | 1679   | 0     |
| BRA | Brazil | 11580 | Taquarituba     | 0.93 | 0.97 | 1.00 | 0      | 0      | 0     |
| BRA | Brazil | 11581 | Taquarivai      | 0.96 | 0.98 | 0.99 | 0      | 0      | 0     |
| BRA | Brazil | 11582 | Tarabai         | 0.42 | 0.84 | 0.99 | 2755   | 0      | 0     |
| BRA | Brazil | 11583 | Taruma          | 0.38 | 0.77 | 0.97 | 6145   | 463    | 0     |
| BRA | Brazil | 11584 | Tatui           | 0.17 | 0.49 | 0.65 | 75373  | 36830  | 17982 |
| BRA | Brazil | 11585 | Taubate         | 0.08 | 0.43 | 0.62 | 220912 | 112199 | 55475 |
| BRA | Brazil | 11586 | Tejupa          | 1.00 | 1.00 | 1.00 | 0      | 0      | 0     |
| BRA | Brazil | 11587 | Teodoro Sampaio | 0.17 | 0.49 | 0.65 | 14375  | 7024   | 3429  |
| BRA | Brazil | 11588 | Terra Roxa      | 0.17 | 0.49 | 0.65 | 5794   | 2831   | 1382  |
| BRA | Brazil | 11589 | Tiete           | 0.09 | 0.50 | 0.74 | 29195  | 12180  | 2417  |
| BRA | Brazil | 11590 | Timburi         | 0.96 | 0.97 | 0.98 | 0      | 0      | 0     |
| BRA | Brazil | 11591 | Torre De Pedra  | 0.81 | 0.92 | 1.00 | 0      | 0      | 0     |
| BRA | Brazil | 11592 | Torrinha        | 0.29 | 0.69 | 0.91 | 5019   | 1132   | 0     |
| BRA | Brazil | 11593 | Trabiju         | 0.08 | 0.40 | 0.55 | 1251   | 690    | 429   |
| BRA | Brazil | 11594 | Tremembe        | 0.08 | 0.40 | 0.55 | 34615  | 19098  | 11868 |
| BRA | Brazil | 11595 | Tres Fronteiras | 0.17 | 0.49 | 0.65 | 3627   | 1772   | 865   |

|     |        |       |                         |      |      |      |        |        |        |
|-----|--------|-------|-------------------------|------|------|------|--------|--------|--------|
| BRA | Brazil | 11596 | Tuiuti                  | 0.08 | 0.41 | 0.58 | 4839   | 2590   | 1504   |
| BRA | Brazil | 11597 | Tupa                    | 0.38 | 0.81 | 0.97 | 27852  | 0      | 0      |
| BRA | Brazil | 11598 | Tupi Paulista           | 0.30 | 0.81 | 0.95 | 7593   | 0      | 0      |
| BRA | Brazil | 11599 | Turiuba                 | 0.42 | 0.80 | 0.94 | 764    | 5      | 0      |
| BRA | Brazil | 11600 | Turmalina               | 0.17 | 0.49 | 0.65 | 1203   | 588    | 287    |
| BRA | Brazil | 11601 | Ubarana                 | 0.17 | 0.49 | 0.65 | 3857   | 1885   | 920    |
| BRA | Brazil | 11602 | Ubatuba                 | 0.08 | 0.42 | 0.59 | 63199  | 33026  | 18118  |
| BRA | Brazil | 11603 | Ubirajara               | 0.38 | 0.76 | 0.98 | 1979   | 192    | 0      |
| BRA | Brazil | 11604 | Uchoa                   | 0.39 | 0.82 | 0.99 | 4145   | 0      | 0      |
| BRA | Brazil | 11605 | Uniao Paulista          | 0.45 | 0.89 | 1.00 | 624    | 0      | 0      |
| BRA | Brazil | 11606 | Urania                  | 0.38 | 0.81 | 0.97 | 3824   | 0      | 0      |
| BRA | Brazil | 11607 | Uru                     | 0.75 | 0.89 | 0.97 | 61     | 0      | 0      |
| BRA | Brazil | 11608 | Urupes                  | 0.51 | 0.82 | 0.96 | 3911   | 0      | 0      |
| BRA | Brazil | 11609 | Valentim Gentil         | 0.17 | 0.49 | 0.65 | 8117   | 3966   | 1937   |
| BRA | Brazil | 11610 | Valinhos                | 0.08 | 0.44 | 0.63 | 91292  | 45778  | 22118  |
| BRA | Brazil | 11611 | Valparaiso              | 0.17 | 0.49 | 0.65 | 16200  | 7916   | 3865   |
| BRA | Brazil | 11612 | Vargem                  | 0.17 | 0.49 | 0.65 | 6501   | 3177   | 1551   |
| BRA | Brazil | 11613 | Vargem Grande Do Sul    | 0.08 | 0.40 | 0.55 | 30423  | 16785  | 10431  |
| BRA | Brazil | 11614 | Vargem Grande Paulista  | 0.08 | 0.40 | 0.55 | 28010  | 15454  | 9604   |
| BRA | Brazil | 11615 | Varzea Paulista         | 0.08 | 0.42 | 0.59 | 84166  | 44419  | 25010  |
| BRA | Brazil | 11616 | Vera Cruz               | 0.08 | 0.40 | 0.55 | 8057   | 4445   | 2762   |
| BRA | Brazil | 11617 | Vinhedo                 | 0.08 | 0.45 | 0.65 | 55081  | 26622  | 11189  |
| BRA | Brazil | 11618 | Viradouro               | 0.36 | 0.83 | 1.00 | 8134   | 0      | 0      |
| BRA | Brazil | 11619 | Vista Alegre Do Alto    | 0.47 | 0.83 | 0.97 | 2826   | 0      | 0      |
| BRA | Brazil | 11620 | Vitoria Brasil          | 0.17 | 0.49 | 0.65 | 1147   | 561    | 274    |
| BRA | Brazil | 11621 | Votorantim              | 0.08 | 0.43 | 0.60 | 84649  | 43777  | 23238  |
| BRA | Brazil | 11622 | Votuporanga             | 0.32 | 0.79 | 0.98 | 44261  | 613    | 0      |
| BRA | Brazil | 11623 | Zacarias                | 0.44 | 0.81 | 0.97 | 959    | 0      | 0      |
| BRA | Brazil | 11624 | Amparo De Sao Francisco | 0.08 | 0.40 | 0.55 | 1480   | 816    | 507    |
| BRA | Brazil | 11625 | Aquidaba                | 0.08 | 0.40 | 0.55 | 16087  | 8876   | 5516   |
| BRA | Brazil | 11626 | Aracaju                 | 0.08 | 0.40 | 0.55 | 470346 | 259502 | 161266 |
| BRA | Brazil | 11627 | Araua                   | 0.08 | 0.40 | 0.55 | 7421   | 4094   | 2544   |
| BRA | Brazil | 11628 | Areia Branca            | 0.08 | 0.40 | 0.55 | 12687  | 7000   | 4350   |

|     |        |       |                          |      |      |      |       |       |       |
|-----|--------|-------|--------------------------|------|------|------|-------|-------|-------|
| BRA | Brazil | 11629 | Barra Dos Coqueiros      | 0.08 | 0.40 | 0.55 | 21223 | 11709 | 7277  |
| BRA | Brazil | 11630 | Boquim                   | 0.08 | 0.40 | 0.55 | 20580 | 11354 | 7056  |
| BRA | Brazil | 11631 | Brejo Grande             | 0.08 | 0.40 | 0.55 | 6032  | 3328  | 2068  |
| BRA | Brazil | 11632 | Campo Do Brito           | 0.08 | 0.40 | 0.55 | 13433 | 7412  | 4606  |
| BRA | Brazil | 11634 | Canhoba                  | 0.08 | 0.40 | 0.55 | 2794  | 1542  | 958   |
| BRA | Brazil | 11635 | Caninde De Sao Francisco | 0.08 | 0.40 | 0.55 | 21609 | 11922 | 7409  |
| BRA | Brazil | 11636 | Capela                   | 0.08 | 0.40 | 0.55 | 24072 | 13281 | 8254  |
| BRA | Brazil | 11637 | Carira                   | 0.08 | 0.40 | 0.55 | 15588 | 8600  | 5344  |
| BRA | Brazil | 11638 | Carmopolis               | 0.08 | 0.40 | 0.55 | 12184 | 6722  | 4177  |
| BRA | Brazil | 11639 | Cedro De Sao Joao        | 0.08 | 0.40 | 0.55 | 4301  | 2373  | 1475  |
| BRA | Brazil | 11640 | Cristinapolis            | 0.08 | 0.40 | 0.55 | 13579 | 7492  | 4656  |
| BRA | Brazil | 11641 | Cumbe                    | 0.08 | 0.40 | 0.55 | 3049  | 1682  | 1045  |
| BRA | Brazil | 11642 | Divina Pastora           | 0.08 | 0.40 | 0.55 | 4307  | 2377  | 1477  |
| BRA | Brazil | 11643 | Estancia                 | 0.08 | 0.40 | 0.55 | 49713 | 27428 | 17045 |
| BRA | Brazil | 11644 | Feira Nova               | 0.08 | 0.40 | 0.55 | 4090  | 2257  | 1402  |
| BRA | Brazil | 11645 | Frei Paulo               | 0.08 | 0.40 | 0.55 | 11241 | 6202  | 3854  |
| BRA | Brazil | 11646 | Gararu                   | 0.08 | 0.40 | 0.55 | 8313  | 4587  | 2850  |
| BRA | Brazil | 11647 | General Maynard          | 0.08 | 0.40 | 0.55 | 2139  | 1180  | 733   |
| BRA | Brazil | 11648 | Gracho Cardoso           | 0.08 | 0.40 | 0.55 | 4169  | 2300  | 1429  |
| BRA | Brazil | 11649 | Ilha Das Flores          | 0.08 | 0.40 | 0.55 | 6102  | 3367  | 2092  |
| BRA | Brazil | 11650 | Indiaroba                | 0.08 | 0.40 | 0.55 | 12696 | 7005  | 4353  |
| BRA | Brazil | 11651 | Itabaiana                | 0.08 | 0.40 | 0.55 | 68719 | 37914 | 23562 |
| BRA | Brazil | 11652 | Itabaianinha             | 0.08 | 0.40 | 0.55 | 29833 | 16460 | 10229 |
| BRA | Brazil | 11653 | Itabi                    | 0.08 | 0.40 | 0.55 | 4014  | 2214  | 1376  |
| BRA | Brazil | 11654 | Itaporanga D'ajuda       | 0.08 | 0.40 | 0.55 | 25196 | 13901 | 8639  |
| BRA | Brazil | 11655 | Japarutuba               | 0.08 | 0.40 | 0.55 | 14012 | 7731  | 4804  |
| BRA | Brazil | 11656 | Japoata                  | 0.08 | 0.40 | 0.55 | 9653  | 5326  | 3310  |
| BRA | Brazil | 11657 | Lagarto                  | 0.08 | 0.40 | 0.55 | 75158 | 41467 | 25769 |
| BRA | Brazil | 11658 | Laranjeiras              | 0.08 | 0.40 | 0.55 | 21463 | 11842 | 7359  |
| BRA | Brazil | 11659 | Macambira                | 0.08 | 0.40 | 0.55 | 4990  | 2753  | 1711  |
| BRA | Brazil | 11660 | Malhada Dos Bois         | 0.08 | 0.40 | 0.55 | 1977  | 1091  | 678   |
| BRA | Brazil | 11661 | Malhador                 | 0.08 | 0.40 | 0.55 | 9102  | 5022  | 3121  |
| BRA | Brazil | 11662 | Maruim                   | 0.08 | 0.40 | 0.55 | 12602 | 6953  | 4321  |

|     |        |       |                          |      |      |      |        |       |       |
|-----|--------|-------|--------------------------|------|------|------|--------|-------|-------|
| BRA | Brazil | 11663 | Moita Bonita             | 0.08 | 0.40 | 0.55 | 8231   | 4541  | 2822  |
| BRA | Brazil | 11664 | Monte Alegre De Sergipe  | 0.08 | 0.40 | 0.55 | 11291  | 6230  | 3871  |
| BRA | Brazil | 11665 | Muribeca                 | 0.08 | 0.40 | 0.55 | 5560   | 3068  | 1906  |
| BRA | Brazil | 11666 | Neopolis                 | 0.08 | 0.40 | 0.55 | 13143  | 7251  | 4506  |
| BRA | Brazil | 11667 | Nossa Senhora Aparecida  | 0.08 | 0.40 | 0.55 | 6602   | 3642  | 2263  |
| BRA | Brazil | 11668 | Nossa Senhora Da Gloria  | 0.08 | 0.40 | 0.55 | 26190  | 14450 | 8980  |
| BRA | Brazil | 11669 | Nossa Senhora Das Dores  | 0.08 | 0.40 | 0.55 | 19136  | 10558 | 6561  |
| BRA | Brazil | 11670 | Nossa Senhora De Lourdes | 0.08 | 0.40 | 0.55 | 4368   | 2410  | 1498  |
| BRA | Brazil | 11671 | Nossa Senhora Do Socorro | 0.08 | 0.40 | 0.55 | 134639 | 74284 | 46163 |
| BRA | Brazil | 11672 | Pacatuba                 | 0.08 | 0.40 | 0.55 | 10110  | 5578  | 3466  |
| BRA | Brazil | 11673 | Pedra Mole               | 0.08 | 0.40 | 0.55 | 2245   | 1239  | 770   |
| BRA | Brazil | 11674 | Pedrinhas                | 0.08 | 0.40 | 0.55 | 6363   | 3511  | 2182  |
| BRA | Brazil | 11675 | Pinhao                   | 0.08 | 0.40 | 0.55 | 4757   | 2625  | 1631  |
| BRA | Brazil | 11676 | Pirambu                  | 0.08 | 0.40 | 0.55 | 5687   | 3137  | 1950  |
| BRA | Brazil | 11677 | Poco Redondo             | 0.08 | 0.40 | 0.55 | 25135  | 13868 | 8618  |
| BRA | Brazil | 11678 | Poco Verde               | 0.08 | 0.40 | 0.55 | 15707  | 8666  | 5386  |
| BRA | Brazil | 11679 | Porto Da Folha           | 0.08 | 0.40 | 0.55 | 21079  | 11630 | 7227  |
| BRA | Brazil | 11680 | Propria                  | 0.08 | 0.40 | 0.55 | 21011  | 11592 | 7204  |
| BRA | Brazil | 11681 | Riachao Do Dantas        | 0.08 | 0.40 | 0.55 | 14262  | 7869  | 4890  |
| BRA | Brazil | 11682 | Riachuelo                | 0.08 | 0.40 | 0.55 | 6839   | 3773  | 2345  |
| BRA | Brazil | 11683 | Ribeiropolis             | 0.08 | 0.40 | 0.55 | 13564  | 7484  | 4651  |
| BRA | Brazil | 11684 | Rosario Do Catete        | 0.08 | 0.40 | 0.55 | 7449   | 4110  | 2554  |
| BRA | Brazil | 11685 | Salgado                  | 0.08 | 0.40 | 0.55 | 15131  | 8348  | 5188  |
| BRA | Brazil | 11686 | Santa Luzia Do Itanhy    | 0.08 | 0.40 | 0.55 | 10709  | 5908  | 3672  |
| BRA | Brazil | 11687 | Santa Rosa De Lima       | 0.08 | 0.40 | 0.55 | 2858   | 1577  | 980   |
| BRA | Brazil | 11688 | Santana Do Sao Francisco | 0.08 | 0.40 | 0.55 | 5043   | 2782  | 1729  |
| BRA | Brazil | 11689 | Santo Amaro Das Brotas   | 0.08 | 0.40 | 0.55 | 9039   | 4987  | 3099  |
| BRA | Brazil | 11690 | Sao Cristovao            | 0.08 | 0.40 | 0.55 | 65437  | 36103 | 22436 |
| BRA | Brazil | 11691 | Sao Domingos             | 0.08 | 0.40 | 0.55 | 7887   | 4351  | 2704  |
| BRA | Brazil | 11692 | Sao Francisco            | 0.08 | 0.40 | 0.55 | 3703   | 2043  | 1270  |
| BRA | Brazil | 11693 | Sao Miguel Do Aleixo     | 0.08 | 0.40 | 0.55 | 2859   | 1577  | 980   |
| BRA | Brazil | 11694 | Simao Dias               | 0.08 | 0.40 | 0.55 | 29452  | 16249 | 10098 |
| BRA | Brazil | 11695 | Siriri                   | 0.08 | 0.40 | 0.55 | 7170   | 3956  | 2458  |

|     |        |       |                           |      |      |      |       |       |       |
|-----|--------|-------|---------------------------|------|------|------|-------|-------|-------|
| BRA | Brazil | 11696 | Telha                     | 0.08 | 0.40 | 0.55 | 2412  | 1331  | 827   |
| BRA | Brazil | 11697 | Tobias Barreto            | 0.08 | 0.40 | 0.55 | 40389 | 22284 | 13848 |
| BRA | Brazil | 11698 | Tomar Do Geru             | 0.08 | 0.40 | 0.55 | 9532  | 5259  | 3268  |
| BRA | Brazil | 11699 | Umbauba                   | 0.08 | 0.40 | 0.55 | 17890 | 9870  | 6134  |
| BRA | Brazil | 11700 | Abreulandia               | 0.43 | 0.82 | 1.00 | 971   | 0     | 0     |
| BRA | Brazil | 11701 | Aguiarnopolis             | 0.41 | 0.79 | 0.99 | 2767  | 65    | 0     |
| BRA | Brazil | 11702 | Alianca Do Tocantins      | 0.38 | 0.84 | 1.00 | 2389  | 0     | 0     |
| BRA | Brazil | 11703 | Almas                     | 0.39 | 0.82 | 1.00 | 3083  | 0     | 0     |
| BRA | Brazil | 11704 | Alvorada                  | 0.17 | 0.49 | 0.65 | 5407  | 2642  | 1290  |
| BRA | Brazil | 11705 | Ananas                    | 0.39 | 0.83 | 1.00 | 3904  | 0     | 0     |
| BRA | Brazil | 11706 | Angico                    | 0.41 | 0.80 | 1.00 | 1409  | 0     | 0     |
| BRA | Brazil | 11707 | Aparecida Do Rio Negro    | 0.43 | 0.81 | 1.00 | 1789  | 0     | 0     |
| BRA | Brazil | 11708 | Aragominas                | 0.50 | 0.84 | 1.00 | 1731  | 0     | 0     |
| BRA | Brazil | 11709 | Araguacema                | 0.37 | 0.79 | 0.99 | 3025  | 46    | 0     |
| BRA | Brazil | 11710 | Araguacu                  | 0.45 | 0.82 | 0.98 | 3066  | 0     | 0     |
| BRA | Brazil | 11711 | Araguaina                 | 0.46 | 0.81 | 1.00 | 59230 | 0     | 0     |
| BRA | Brazil | 11712 | Araguana                  | 0.17 | 0.49 | 0.65 | 3424  | 1673  | 817   |
| BRA | Brazil | 11713 | Araguatins                | 0.36 | 0.79 | 1.00 | 15966 | 191   | 0     |
| BRA | Brazil | 11714 | Arapoema                  | 0.44 | 0.79 | 1.00 | 2497  | 80    | 0     |
| BRA | Brazil | 11715 | Arraias                   | 0.62 | 0.93 | 1.00 | 1944  | 0     | 0     |
| BRA | Brazil | 11716 | Augustinopolis            | 0.35 | 0.81 | 1.00 | 8224  | 0     | 0     |
| BRA | Brazil | 11717 | Aurora Do Tocantins       | 0.50 | 0.81 | 0.98 | 1141  | 0     | 0     |
| BRA | Brazil | 11718 | Axixa Do Tocantins        | 0.41 | 0.86 | 1.00 | 3524  | 0     | 0     |
| BRA | Brazil | 11719 | Babaculandia              | 0.25 | 0.67 | 0.94 | 9489  | 2205  | 0     |
| BRA | Brazil | 11720 | Bandeirantes Do Tocantins | 0.40 | 0.77 | 0.98 | 1479  | 101   | 0     |
| BRA | Brazil | 11721 | Barra Do Ouro             | 0.38 | 0.81 | 1.00 | 1941  | 0     | 0     |
| BRA | Brazil | 11722 | Barrolandia               | 0.49 | 0.84 | 1.00 | 1736  | 0     | 0     |
| BRA | Brazil | 11723 | Bernardo Sayao            | 0.40 | 0.84 | 1.00 | 1754  | 0     | 0     |
| BRA | Brazil | 11724 | Bom Jesus Do Tocantins    | 0.17 | 0.49 | 0.65 | 3203  | 1565  | 764   |
| BRA | Brazil | 11725 | Brasilandia Do Tocantins  | 0.48 | 0.87 | 0.99 | 707   | 0     | 0     |
| BRA | Brazil | 11726 | Brejinho De Nazare        | 0.36 | 0.78 | 0.99 | 2466  | 133   | 0     |
| BRA | Brazil | 11727 | Buriti Do Tocantins       | 0.34 | 0.80 | 1.00 | 4288  | 35    | 0     |
| BRA | Brazil | 11728 | Cachoeirinha              | 0.17 | 0.49 | 0.65 | 1466  | 716   | 350   |

|     |        |       |                          |      |      |      |       |      |      |
|-----|--------|-------|--------------------------|------|------|------|-------|------|------|
| BRA | Brazil | 11729 | Campos Lindos            | 0.34 | 0.78 | 1.00 | 4578  | 231  | 0    |
| BRA | Brazil | 11730 | Cariri Do Tocantins      | 0.42 | 0.82 | 0.99 | 1454  | 0    | 0    |
| BRA | Brazil | 11731 | Carmolandia              | 0.39 | 0.77 | 1.00 | 1072  | 74   | 0    |
| BRA | Brazil | 11732 | Carrasco Bonito          | 0.38 | 0.84 | 1.00 | 1387  | 0    | 0    |
| BRA | Brazil | 11733 | Caseara                  | 0.35 | 0.82 | 1.00 | 2306  | 0    | 0    |
| BRA | Brazil | 11734 | Centenario               | 0.17 | 0.49 | 0.65 | 1772  | 866  | 423  |
| BRA | Brazil | 11735 | Chapada Da Natividade    | 0.47 | 0.84 | 1.00 | 1136  | 0    | 0    |
| BRA | Brazil | 11736 | Chapada De Areia         | 0.42 | 0.85 | 0.98 | 532   | 0    | 0    |
| BRA | Brazil | 11737 | Colinas Do Tocantins     | 0.43 | 0.80 | 1.00 | 13020 | 67   | 0    |
| BRA | Brazil | 11738 | Colmeia                  | 0.42 | 0.84 | 1.00 | 3240  | 0    | 0    |
| BRA | Brazil | 11739 | Combinado                | 0.51 | 0.84 | 1.00 | 1471  | 0    | 0    |
| BRA | Brazil | 11740 | Conceicao Do Tocantins   | 0.39 | 0.86 | 1.00 | 1565  | 0    | 0    |
| BRA | Brazil | 11741 | Couto De Magalhaes       | 0.35 | 0.78 | 1.00 | 2511  | 89   | 0    |
| BRA | Brazil | 11742 | Cristalandia             | 0.38 | 0.81 | 1.00 | 3122  | 0    | 0    |
| BRA | Brazil | 11743 | Crixas Do Tocantins      | 0.48 | 0.81 | 0.99 | 523   | 0    | 0    |
| BRA | Brazil | 11744 | Darcinopolis             | 0.37 | 0.80 | 1.00 | 2575  | 30   | 0    |
| BRA | Brazil | 11745 | Dianopolis               | 0.42 | 0.85 | 1.00 | 8535  | 0    | 0    |
| BRA | Brazil | 11746 | Divinopolis Do Tocantins | 0.43 | 0.85 | 1.00 | 2550  | 0    | 0    |
| BRA | Brazil | 11747 | Dois Irmaos Do Tocantins | 0.32 | 0.78 | 0.98 | 3548  | 112  | 0    |
| BRA | Brazil | 11748 | Duere                    | 0.40 | 0.80 | 0.99 | 1867  | 20   | 0    |
| BRA | Brazil | 11749 | Esperantina              | 0.17 | 0.49 | 0.65 | 6853  | 3349 | 1635 |
| BRA | Brazil | 11750 | Fatima                   | 0.17 | 0.49 | 0.65 | 2452  | 1198 | 585  |
| BRA | Brazil | 11751 | Figueiropolis            | 0.43 | 0.82 | 0.99 | 2001  | 0    | 0    |
| BRA | Brazil | 11752 | Filadelfia               | 0.17 | 0.49 | 0.65 | 5915  | 2891 | 1411 |
| BRA | Brazil | 11753 | Formoso Do Araguaia      | 0.36 | 0.81 | 1.00 | 8366  | 0    | 0    |
| BRA | Brazil | 11754 | Fortaleza Do Tabocao     | 0.39 | 0.83 | 1.00 | 1070  | 0    | 0    |
| BRA | Brazil | 11755 | Goianorte                | 0.35 | 0.83 | 0.98 | 2308  | 0    | 0    |
| BRA | Brazil | 11756 | Goiatins                 | 0.36 | 0.79 | 1.00 | 5666  | 106  | 0    |
| BRA | Brazil | 11757 | Guarai                   | 0.44 | 0.85 | 1.00 | 9155  | 0    | 0    |
| BRA | Brazil | 11758 | Gurupi                   | 0.40 | 0.83 | 1.00 | 34195 | 0    | 0    |
| BRA | Brazil | 11759 | Ipueiras                 | 0.17 | 0.49 | 0.65 | 1284  | 628  | 306  |
| BRA | Brazil | 11760 | Itacaja                  | 0.42 | 0.80 | 1.00 | 3018  | 0    | 0    |
| BRA | Brazil | 11761 | Itaguatins               | 0.39 | 0.74 | 0.98 | 2831  | 408  | 0    |



|     |        |       |                           |      |      |      |        |       |       |
|-----|--------|-------|---------------------------|------|------|------|--------|-------|-------|
| BRA | Brazil | 11762 | Itapiratins               | 0.37 | 0.81 | 1.00 | 1566   | 0     | 0     |
| BRA | Brazil | 11763 | Itapora Do Tocantins      | 0.46 | 0.86 | 1.00 | 817    | 0     | 0     |
| BRA | Brazil | 11764 | Jau Do Tocantins          | 0.37 | 0.80 | 0.98 | 1648   | 0     | 0     |
| BRA | Brazil | 11765 | Juarina                   | 0.43 | 0.83 | 0.99 | 828    | 0     | 0     |
| BRA | Brazil | 11766 | Lagoa Da Confusao         | 0.31 | 0.74 | 0.98 | 6636   | 823   | 0     |
| BRA | Brazil | 11767 | Lagoa Do Tocantins        | 0.34 | 0.78 | 1.00 | 1976   | 76    | 0     |
| BRA | Brazil | 11768 | Lajeado                   | 0.17 | 0.49 | 0.65 | 947    | 463   | 226   |
| BRA | Brazil | 11769 | Lavandeira                | 0.72 | 0.94 | 1.00 | 132    | 0     | 0     |
| BRA | Brazil | 11770 | Lizarda                   | 0.39 | 0.75 | 0.99 | 1605   | 177   | 0     |
| BRA | Brazil | 11771 | Luzinopolis               | 0.38 | 0.79 | 1.00 | 1282   | 22    | 0     |
| BRA | Brazil | 11772 | Marianopolis Do Tocantins | 0.32 | 0.77 | 0.99 | 2464   | 168   | 0     |
| BRA | Brazil | 11773 | Mateiros                  | 0.33 | 0.78 | 1.00 | 1170   | 58    | 0     |
| BRA | Brazil | 11774 | Maurilandia Do Tocantins  | 0.36 | 0.80 | 0.99 | 1552   | 0     | 0     |
| BRA | Brazil | 11775 | Miracema Do Tocantins     | 0.36 | 0.84 | 1.00 | 8779   | 0     | 0     |
| BRA | Brazil | 11776 | Miranorte                 | 0.43 | 0.83 | 0.99 | 5014   | 0     | 0     |
| BRA | Brazil | 11777 | Monte Do Carmo            | 0.31 | 0.76 | 0.99 | 3787   | 289   | 0     |
| BRA | Brazil | 11778 | Monte Santo Do Tocantins  | 0.37 | 0.75 | 0.98 | 983    | 105   | 0     |
| BRA | Brazil | 11779 | Mosquito                  | 0.30 | 0.72 | 0.98 | 3345   | 518   | 0     |
| BRA | Brazil | 11780 | Muricilandia              | 0.31 | 0.78 | 0.98 | 1932   | 97    | 0     |
| BRA | Brazil | 11781 | Natividade                | 0.17 | 0.49 | 0.65 | 5884   | 2875  | 1404  |
| BRA | Brazil | 11782 | Nazare                    | 0.17 | 0.49 | 0.65 | 2588   | 1265  | 617   |
| BRA | Brazil | 11783 | Nova Olinda               | 0.17 | 0.49 | 0.65 | 7374   | 3603  | 1759  |
| BRA | Brazil | 11784 | Nova Rosalandia           | 0.39 | 0.83 | 0.99 | 1649   | 0     | 0     |
| BRA | Brazil | 11785 | Novo Acordo               | 0.40 | 0.79 | 1.00 | 1456   | 54    | 0     |
| BRA | Brazil | 11786 | Novo Alegre               | 0.40 | 0.83 | 0.99 | 853    | 0     | 0     |
| BRA | Brazil | 11787 | Novo Jardim               | 0.38 | 0.82 | 1.00 | 1144   | 0     | 0     |
| BRA | Brazil | 11788 | Oliveira De Fatima        | 0.48 | 0.86 | 1.00 | 361    | 0     | 0     |
| BRA | Brazil | 11789 | Palmas                    | 0.17 | 0.49 | 0.65 | 192283 | 93957 | 45874 |
| BRA | Brazil | 11790 | Palmeirante               | 0.42 | 0.77 | 0.97 | 2285   | 180   | 0     |
| BRA | Brazil | 11791 | Palmeiropolis             | 0.43 | 0.86 | 1.00 | 2858   | 0     | 0     |
| BRA | Brazil | 11792 | Paraiso Do Tocantins      | 0.41 | 0.80 | 1.00 | 20130  | 0     | 0     |
| BRA | Brazil | 11793 | Parana                    | 0.17 | 0.49 | 0.65 | 7169   | 3503  | 1710  |
| BRA | Brazil | 11794 | Pau D'arco                | 0.17 | 0.49 | 0.65 | 2945   | 1439  | 703   |

|     |        |       |                              |      |      |      |       |      |     |
|-----|--------|-------|------------------------------|------|------|------|-------|------|-----|
| BRA | Brazil | 11795 | Pedro Afonso                 | 0.39 | 0.83 | 1.00 | 5224  | 0    | 0   |
| BRA | Brazil | 11796 | Peixe                        | 0.35 | 0.78 | 0.96 | 5046  | 205  | 0   |
| BRA | Brazil | 11797 | Pequizeiro                   | 0.35 | 0.78 | 0.99 | 2469  | 132  | 0   |
| BRA | Brazil | 11798 | Pindorama Do Tocantins       | 0.34 | 0.78 | 1.00 | 2109  | 113  | 0   |
| BRA | Brazil | 11799 | Piraque                      | 0.35 | 0.71 | 0.96 | 1469  | 299  | 0   |
| BRA | Brazil | 11800 | Pium                         | 0.38 | 0.80 | 0.99 | 3290  | 0    | 0   |
| BRA | Brazil | 11801 | Ponte Alta Do Bom Jesus      | 0.42 | 0.81 | 0.99 | 1746  | 0    | 0   |
| BRA | Brazil | 11802 | Ponte Alta Do Tocantins      | 0.36 | 0.81 | 1.00 | 3618  | 0    | 0   |
| BRA | Brazil | 11803 | Porto Alegre Do Tocantins    | 0.42 | 0.82 | 1.00 | 1040  | 0    | 0   |
| BRA | Brazil | 11804 | Porto Nacional               | 0.36 | 0.82 | 1.00 | 23066 | 0    | 0   |
| BRA | Brazil | 11805 | Praia Norte                  | 0.32 | 0.76 | 0.99 | 4115  | 302  | 0   |
| BRA | Brazil | 11806 | Presidente Kennedy           | 0.17 | 0.49 | 0.65 | 2371  | 1158 | 566 |
| BRA | Brazil | 11807 | Pugmil                       | 0.42 | 0.82 | 1.00 | 1024  | 0    | 0   |
| BRA | Brazil | 11808 | Recursolandia                | 0.42 | 0.86 | 1.00 | 1273  | 0    | 0   |
| BRA | Brazil | 11809 | Riachinho                    | 0.17 | 0.49 | 0.65 | 3200  | 1564 | 764 |
| BRA | Brazil | 11810 | Rio Da Conceicao             | 0.42 | 0.83 | 1.00 | 796   | 0    | 0   |
| BRA | Brazil | 11811 | Rio Dos Bois                 | 0.66 | 0.86 | 0.99 | 399   | 0    | 0   |
| BRA | Brazil | 11812 | Rio Sono                     | 0.30 | 0.74 | 0.98 | 3369  | 382  | 0   |
| BRA | Brazil | 11813 | Sampaio                      | 0.40 | 0.77 | 0.99 | 2051  | 152  | 0   |
| BRA | Brazil | 11814 | Sandolandia                  | 0.43 | 0.82 | 0.99 | 1284  | 0    | 0   |
| BRA | Brazil | 11815 | Santa Fe Do Araguaia         | 0.44 | 0.83 | 1.00 | 2548  | 0    | 0   |
| BRA | Brazil | 11816 | Santa Maria Do Tocantins     | 0.36 | 0.83 | 1.00 | 1505  | 0    | 0   |
| BRA | Brazil | 11817 | Santa Rita Do Tocantins      | 0.37 | 0.75 | 0.97 | 1050  | 121  | 0   |
| BRA | Brazil | 11818 | Santa Rosa Do Tocantins      | 0.35 | 0.82 | 1.00 | 2168  | 0    | 0   |
| BRA | Brazil | 11819 | Santa Tereza Do Tocantins    | 0.39 | 0.84 | 1.00 | 1158  | 0    | 0   |
| BRA | Brazil | 11820 | Santa Terezinha Do Tocantins | 0.40 | 0.83 | 0.99 | 1028  | 0    | 0   |
| BRA | Brazil | 11821 | Sao Bento Do Tocantins       | 0.33 | 0.78 | 0.99 | 3133  | 128  | 0   |
| BRA | Brazil | 11822 | Sao Felix Do Tocantins       | 0.40 | 0.82 | 1.00 | 605   | 0    | 0   |
| BRA | Brazil | 11823 | Sao Miguel Do Tocantins      | 0.37 | 0.76 | 0.98 | 5795  | 572  | 0   |
| BRA | Brazil | 11824 | Sao Salvador Do Tocantins    | 0.66 | 0.89 | 0.99 | 427   | 0    | 0   |
| BRA | Brazil | 11825 | Sao Sebastiao Do Tocantins   | 0.39 | 0.84 | 1.00 | 1980  | 0    | 0   |
| BRA | Brazil | 11826 | Sao Valerio Da Natividade    | 0.47 | 0.91 | 1.00 | 1339  | 0    | 0   |
| BRA | Brazil | 11827 | Silvanopolis                 | 0.37 | 0.79 | 1.00 | 2372  | 37   | 0   |

|     |                          |       |                         |      |      |      |       |       |       |
|-----|--------------------------|-------|-------------------------|------|------|------|-------|-------|-------|
| BRA | Brazil                   | 11828 | Sitio Novo Do Tocantins | 0.51 | 0.84 | 1.00 | 2548  | 0     | 0     |
| BRA | Brazil                   | 11829 | Sucupira                | 0.40 | 0.74 | 0.96 | 1050  | 162   | 0     |
| BRA | Brazil                   | 11830 | Taguatinga              | 0.36 | 0.79 | 0.98 | 7367  | 148   | 0     |
| BRA | Brazil                   | 11831 | Taipas Do Tocantins     | 0.40 | 0.82 | 0.99 | 899   | 0     | 0     |
| BRA | Brazil                   | 11832 | Talisma                 | 0.49 | 0.83 | 0.99 | 857   | 0     | 0     |
| BRA | Brazil                   | 11833 | Tocantinia              | 0.36 | 0.81 | 1.00 | 3451  | 0     | 0     |
| BRA | Brazil                   | 11834 | Tocantinopolis          | 0.38 | 0.81 | 1.00 | 9734  | 0     | 0     |
| BRA | Brazil                   | 11835 | Tupirama                | 0.39 | 0.76 | 0.96 | 1048  | 105   | 0     |
| BRA | Brazil                   | 11836 | Tupiratis               | 0.31 | 0.77 | 0.97 | 1379  | 95    | 0     |
| BRA | Brazil                   | 11837 | Wanderlandia            | 0.34 | 0.73 | 0.97 | 5469  | 863   | 0     |
| BRA | Brazil                   | 11838 | Xambioa                 | 0.48 | 0.84 | 1.00 | 3859  | 0     | 0     |
| CAF | Central African Republic | 12835 | Bamingui                | 0.28 | 0.29 | 0.30 | 4546  | 4388  | 4307  |
| CAF | Central African Republic | 12836 | Ndele                   | 0.28 | 0.29 | 0.30 | 23867 | 23036 | 22609 |
| CAF | Central African Republic | 12837 | Alindao                 | 0.28 | 0.29 | 0.30 | 44679 | 43124 | 42325 |
| CAF | Central African Republic | 12838 | Kembe                   | 0.28 | 0.29 | 0.30 | 38595 | 37252 | 36562 |
| CAF | Central African Republic | 12839 | Mingala                 | 0.28 | 0.29 | 0.30 | 16889 | 16301 | 15999 |
| CAF | Central African Republic | 12840 | Mobaye                  | 0.28 | 0.29 | 0.30 | 38055 | 36730 | 36050 |
| CAF | Central African Republic | 12841 | Zangba                  | 0.28 | 0.29 | 0.30 | 21798 | 21039 | 20649 |
| CAF | Central African Republic | 12842 | Bambouti                | 0.28 | 0.29 | 0.30 | 1933  | 1866  | 1831  |
| CAF | Central African Republic | 12843 | Djemah                  | 0.28 | 0.29 | 0.30 | 1350  | 1303  | 1279  |
| CAF | Central African Republic | 12844 | Obo                     | 0.28 | 0.29 | 0.30 | 23360 | 22547 | 22129 |
| CAF | Central African Republic | 12845 | Zemio                   | 0.28 | 0.29 | 0.30 | 11254 | 10862 | 10661 |
| CAF | Central African Republic | 12846 | Bria                    | 0.59 | 0.66 | 0.73 | 18046 | 11854 | 5915  |
| CAF | Central African Republic | 12847 | Ouadda                  | 0.59 | 0.66 | 0.73 | 4783  | 3142  | 1568  |
| CAF | Central African Republic | 12848 | Yalinga                 | 0.59 | 0.66 | 0.73 | 1369  | 899   | 449   |
| CAF | Central African Republic | 12849 | Dekoa                   | 0.28 | 0.29 | 0.30 | 23763 | 22936 | 22511 |
| CAF | Central African Republic | 12850 | Mala                    | 0.28 | 0.29 | 0.30 | 8780  | 8475  | 8317  |
| CAF | Central African Republic | 12851 | Ndjoukou                | 0.28 | 0.29 | 0.30 | 18782 | 18128 | 17792 |
| CAF | Central African Republic | 12852 | Sibut                   | 0.28 | 0.29 | 0.30 | 26529 | 25606 | 25131 |
| CAF | Central African Republic | 12853 | Boda                    | 0.60 | 0.67 | 0.74 | 6188  | 4019  | 1916  |
| CAF | Central African Republic | 12854 | Boganangone             | 0.60 | 0.67 | 0.74 | 6857  | 4454  | 2123  |
| CAF | Central African Republic | 12855 | Boganda                 | 0.60 | 0.67 | 0.74 | 3494  | 2269  | 1082  |
| CAF | Central African Republic | 12856 | Mbaiki                  | 0.60 | 0.67 | 0.74 | 39577 | 25704 | 12255 |

|     |                          |       |               |      |      |      |        |        |        |
|-----|--------------------------|-------|---------------|------|------|------|--------|--------|--------|
| CAF | Central African Republic | 12857 | Mongoumba     | 0.60 | 0.67 | 0.74 | 4869   | 3162   | 1508   |
| CAF | Central African Republic | 12858 | Amada Gaza    | 0.28 | 0.29 | 0.30 | 9704   | 9367   | 9193   |
| CAF | Central African Republic | 12859 | Berberati     | 0.28 | 0.29 | 0.30 | 92793  | 89564  | 87903  |
| CAF | Central African Republic | 12860 | Carnot        | 0.28 | 0.29 | 0.30 | 58521  | 56484  | 55437  |
| CAF | Central African Republic | 12861 | Dede Mokouba  | 0.28 | 0.29 | 0.30 | 11116  | 10729  | 10530  |
| CAF | Central African Republic | 12862 | Gadzi         | 0.28 | 0.29 | 0.30 | 41211  | 39776  | 39039  |
| CAF | Central African Republic | 12863 | Gamboula      | 0.28 | 0.29 | 0.30 | 17909  | 17286  | 16965  |
| CAF | Central African Republic | 12864 | Sosso Nakombo | 0.28 | 0.29 | 0.30 | 7543   | 7281   | 7146   |
| CAF | Central African Republic | 12865 | Bakouma       | 0.28 | 0.29 | 0.30 | 13549  | 13078  | 12835  |
| CAF | Central African Republic | 12866 | Bangassou     | 0.28 | 0.29 | 0.30 | 43365  | 41856  | 41080  |
| CAF | Central African Republic | 12867 | Gambo         | 0.28 | 0.29 | 0.30 | 14040  | 13551  | 13300  |
| CAF | Central African Republic | 12868 | Ouango        | 0.28 | 0.29 | 0.30 | 25752  | 24856  | 24395  |
| CAF | Central African Republic | 12869 | Rafai         | 0.28 | 0.29 | 0.30 | 8970   | 8657   | 8497   |
| CAF | Central African Republic | 12870 | Kaga Bandoro  | 0.28 | 0.29 | 0.30 | 63706  | 61489  | 60349  |
| CAF | Central African Republic | 12871 | Mbres         | 0.28 | 0.29 | 0.30 | 13140  | 12683  | 12448  |
| CAF | Central African Republic | 12872 | Abba          | 0.28 | 0.29 | 0.30 | 12949  | 12498  | 12266  |
| CAF | Central African Republic | 12873 | Baboua        | 0.28 | 0.29 | 0.30 | 33171  | 32016  | 31423  |
| CAF | Central African Republic | 12874 | Baoro         | 0.28 | 0.29 | 0.30 | 22093  | 21324  | 20928  |
| CAF | Central African Republic | 12875 | Bouar         | 0.28 | 0.29 | 0.30 | 85403  | 82431  | 80903  |
| CAF | Central African Republic | 12876 | Bimbo         | 0.28 | 0.29 | 0.30 | 426464 | 411623 | 403992 |
| CAF | Central African Republic | 12877 | Boali         | 0.71 | 0.75 | 0.79 | 3297   | 1773   | 229    |
| CAF | Central African Republic | 12878 | Bogangolo     | 0.28 | 0.29 | 0.30 | 6444   | 6220   | 6104   |
| CAF | Central African Republic | 12879 | Bossembele    | 0.47 | 0.57 | 0.66 | 15375  | 10924  | 6835   |
| CAF | Central African Republic | 12880 | Damara        | 0.71 | 0.75 | 0.79 | 3787   | 2036   | 263    |
| CAF | Central African Republic | 12881 | Yaloke        | 0.47 | 0.59 | 0.69 | 19061  | 12434  | 6401   |
| CAF | Central African Republic | 12882 | Bakala        | 0.28 | 0.29 | 0.30 | 5855   | 5651   | 5547   |
| CAF | Central African Republic | 12883 | Bambari       | 0.28 | 0.29 | 0.30 | 77087  | 74404  | 73025  |
| CAF | Central African Republic | 12884 | Grimari       | 0.28 | 0.29 | 0.30 | 25859  | 24959  | 24497  |
| CAF | Central African Republic | 12885 | Ippy          | 0.28 | 0.29 | 0.30 | 27701  | 26737  | 26241  |
| CAF | Central African Republic | 12886 | Kouango       | 0.28 | 0.29 | 0.30 | 45225  | 43651  | 42842  |
| CAF | Central African Republic | 12887 | Bocaranga     | 0.28 | 0.29 | 0.30 | 53924  | 52047  | 51082  |
| CAF | Central African Republic | 12888 | Bozoum        | 0.69 | 0.74 | 0.78 | 9880   | 5639   | 1346   |
| CAF | Central African Republic | 12889 | Koui          | 0.28 | 0.29 | 0.30 | 18158  | 17526  | 17201  |

|     |                          |       |               |      |      |      |        |        |        |
|-----|--------------------------|-------|---------------|------|------|------|--------|--------|--------|
| CAF | Central African Republic | 12890 | Ngaoundaye    | 0.28 | 0.29 | 0.30 | 52305  | 50485  | 49549  |
| CAF | Central African Republic | 12891 | Paoua         | 0.28 | 0.29 | 0.30 | 107589 | 103844 | 101919 |
| CAF | Central African Republic | 12892 | Batangafo     | 0.28 | 0.29 | 0.30 | 38617  | 37273  | 36582  |
| CAF | Central African Republic | 12893 | Boguila       | 0.28 | 0.29 | 0.30 | 15477  | 14938  | 14661  |
| CAF | Central African Republic | 12894 | Bossangoa     | 0.28 | 0.29 | 0.30 | 83474  | 80569  | 79075  |
| CAF | Central African Republic | 12895 | Bouca         | 0.28 | 0.29 | 0.30 | 37178  | 35884  | 35219  |
| CAF | Central African Republic | 12896 | Kabo          | 0.28 | 0.29 | 0.30 | 29047  | 28036  | 27517  |
| CAF | Central African Republic | 12897 | Markounda     | 0.28 | 0.29 | 0.30 | 11382  | 10986  | 10783  |
| CAF | Central African Republic | 12898 | Nana Bakassa  | 0.28 | 0.29 | 0.30 | 26476  | 25555  | 25081  |
| CAF | Central African Republic | 12899 | Bambio        | 0.60 | 0.67 | 0.74 | 2713   | 1762   | 840    |
| CAF | Central African Republic | 12900 | Bayanga       | 0.60 | 0.67 | 0.74 | 2407   | 1563   | 745    |
| CAF | Central African Republic | 12901 | Nola          | 0.60 | 0.67 | 0.74 | 19874  | 12907  | 6154   |
| CAF | Central African Republic | 12902 | Birao         | 0.28 | 0.29 | 0.30 | 32598  | 31464  | 30881  |
| CAF | Central African Republic | 12903 | Ouanda-djalle | 0.28 | 0.29 | 0.30 | 2517   | 2430   | 2384   |
| CAF | Central African Republic | 67155 | Bangui        | 0.28 | 0.29 | 0.30 | 120959 | 116749 | 114585 |
| CIV | Côte d'Ivoire            | 14900 | Nawa          | 0.37 | 0.39 | 0.39 | 117201 | 113164 | 111559 |
| CIV | Côte d'Ivoire            | 14909 | Belier        | 0.37 | 0.39 | 0.39 | 66222  | 63942  | 63034  |
| CIV | Côte d'Ivoire            | 14910 | Yamoussoukro  | 0.37 | 0.39 | 0.39 | 174085 | 168089 | 165704 |
| CIV | Côte d'Ivoire            | 14911 | Abidjan       | 0.82 | 0.87 | 0.88 | 0      | 0      | 0      |
| CIV | Côte d'Ivoire            | 14928 | Tchologo      | 0.37 | 0.39 | 0.39 | 168979 | 163159 | 160844 |
| CIV | Côte d'Ivoire            | 14929 | Poro          | 0.76 | 0.79 | 0.81 | 30356  | 7011   | 0      |
| CIV | Côte d'Ivoire            | 14941 | Bere          | 0.43 | 0.49 | 0.55 | 101182 | 84751  | 69147  |
| CIV | Côte d'Ivoire            | 14942 | Worodougou    | 0.37 | 0.39 | 0.39 | 98111  | 94732  | 93388  |
| CIV | Côte d'Ivoire            | 14943 | Bafing        | 0.37 | 0.39 | 0.39 | 75857  | 73245  | 72206  |
| CIV | Côte d'Ivoire            | 14945 | Bounkani      | 0.53 | 0.60 | 0.68 | 70169  | 50290  | 31318  |
| CIV | Côte d'Ivoire            | 16846 | Agneby-Tiassa | 0.37 | 0.39 | 0.39 | 313253 | 302464 | 298173 |
| CIV | Côte d'Ivoire            | 16847 | Bagoue        | 0.37 | 0.39 | 0.39 | 150832 | 145637 | 143571 |
| CIV | Côte d'Ivoire            | 16848 | Cavally       | 0.37 | 0.39 | 0.39 | 137574 | 132836 | 130952 |
| CIV | Côte d'Ivoire            | 16849 | Folon         | 0.44 | 0.51 | 0.58 | 33350  | 26598  | 20246  |
| CIV | Côte d'Ivoire            | 16850 | Gbêke         | 0.43 | 0.49 | 0.55 | 480825 | 402744 | 328594 |
| CIV | Côte d'Ivoire            | 16851 | Gbôkle        | 0.37 | 0.39 | 0.39 | 56280  | 54342  | 53571  |
| CIV | Côte d'Ivoire            | 16852 | Gôh           | 0.50 | 0.57 | 0.66 | 247265 | 184737 | 117928 |
| CIV | Côte d'Ivoire            | 16853 | Gontougo      | 0.53 | 0.61 | 0.69 | 197063 | 134866 | 77877  |

|     |                |       |                      |      |      |      |        |        |        |
|-----|----------------|-------|----------------------|------|------|------|--------|--------|--------|
| CIV | CÃ´te d'Ivoire | 16854 | Grands ponts         | 0.37 | 0.39 | 0.39 | 157134 | 151722 | 149570 |
| CIV | CÃ´te d'Ivoire | 16855 | Guemon               | 0.37 | 0.39 | 0.39 | 232523 | 224515 | 221329 |
| CIV | CÃ´te d'Ivoire | 16856 | Hambol               | 0.43 | 0.49 | 0.55 | 146047 | 122330 | 99808  |
| CIV | CÃ´te d'Ivoire | 16857 | Haut-Sassandra       | 0.37 | 0.39 | 0.39 | 605514 | 584659 | 576364 |
| CIV | CÃ´te d'Ivoire | 16858 | Iffou                | 0.37 | 0.39 | 0.39 | 159887 | 154380 | 152190 |
| CIV | CÃ´te d'Ivoire | 16859 | Indenie-Djuablin     | 0.37 | 0.39 | 0.39 | 252859 | 244150 | 240686 |
| CIV | CÃ´te d'Ivoire | 16860 | Kabadougou           | 0.44 | 0.59 | 0.72 | 83845  | 48056  | 18671  |
| CIV | CÃ´te d'Ivoire | 16861 | Lõh-Djiboua          | 0.37 | 0.39 | 0.39 | 379306 | 366242 | 361046 |
| CIV | CÃ´te d'Ivoire | 16862 | Marahoue             | 0.37 | 0.39 | 0.39 | 325484 | 314274 | 309815 |
| CIV | CÃ´te d'Ivoire | 16863 | Me                   | 0.37 | 0.39 | 0.39 | 264841 | 255720 | 252091 |
| CIV | CÃ´te d'Ivoire | 16864 | N'Zi                 | 0.37 | 0.39 | 0.39 | 305391 | 294873 | 290690 |
| CIV | CÃ´te d'Ivoire | 16865 | San-pedro            | 0.37 | 0.39 | 0.39 | 109480 | 105710 | 104210 |
| CIV | CÃ´te d'Ivoire | 16866 | Sud-comoe            | 0.37 | 0.39 | 0.39 | 341804 | 330032 | 325349 |
| CIV | CÃ´te d'Ivoire | 16867 | Tonkpi               | 0.37 | 0.39 | 0.39 | 428385 | 413631 | 407762 |
| CIV | CÃ´te d'Ivoire | 16868 | Belier               | 0.37 | 0.39 | 0.39 | 76190  | 73566  | 72522  |
| CMR | Cameroon       | 12462 | Djerem               | 0.86 | 0.90 | 0.97 | 0      | 0      | 0      |
| CMR | Cameroon       | 12463 | Faro - Et - Déo      | 0.86 | 0.90 | 0.97 | 0      | 0      | 0      |
| CMR | Cameroon       | 12464 | Mayo-Banyo           | 0.86 | 0.90 | 0.97 | 0      | 0      | 0      |
| CMR | Cameroon       | 12465 | Mbééré               | 0.86 | 0.90 | 0.97 | 0      | 0      | 0      |
| CMR | Cameroon       | 12466 | Vina                 | 0.86 | 0.90 | 0.97 | 0      | 0      | 0      |
| CMR | Cameroon       | 12467 | Haute - Sanaga       | 0.91 | 0.94 | 0.99 | 0      | 0      | 0      |
| CMR | Cameroon       | 12468 | Lékié                | 0.91 | 0.94 | 0.99 | 0      | 0      | 0      |
| CMR | Cameroon       | 12469 | Mbam - Et - Inoubou  | 0.91 | 0.94 | 0.99 | 0      | 0      | 0      |
| CMR | Cameroon       | 12470 | Mbam - Et - Kim      | 0.91 | 0.94 | 0.99 | 0      | 0      | 0      |
| CMR | Cameroon       | 12471 | Méfou - Et - Afamba  | 0.91 | 0.94 | 0.99 | 0      | 0      | 0      |
| CMR | Cameroon       | 12472 | Méfou - Et - Akono   | 0.91 | 0.94 | 0.99 | 0      | 0      | 0      |
| CMR | Cameroon       | 12473 | Mfoundi              | 0.91 | 0.94 | 0.99 | 0      | 0      | 0      |
| CMR | Cameroon       | 12474 | Nyong - Et - Kéllé   | 0.91 | 0.94 | 0.99 | 0      | 0      | 0      |
| CMR | Cameroon       | 12475 | Nyong - Et - Mfoumou | 0.91 | 0.95 | 0.99 | 0      | 0      | 0      |
| CMR | Cameroon       | 12476 | Nyong - Et - So'o    | 0.91 | 0.94 | 0.99 | 0      | 0      | 0      |
| CMR | Cameroon       | 12477 | Boumba - Et - Ngoko  | 0.93 | 0.95 | 0.99 | 0      | 0      | 0      |
| CMR | Cameroon       | 12478 | Haut - Nyong         | 0.93 | 0.95 | 0.99 | 0      | 0      | 0      |
| CMR | Cameroon       | 12479 | Kadeï                | 0.93 | 0.95 | 0.99 | 0      | 0      | 0      |

|     |          |       |                     |      |      |      |         |         |         |
|-----|----------|-------|---------------------|------|------|------|---------|---------|---------|
| CMR | Cameroon | 12480 | Lom - Et - Djerem   | 0.93 | 0.95 | 0.99 | 0       | 0       | 0       |
| CMR | Cameroon | 12481 | Diamaré             | 0.31 | 0.36 | 0.38 | 426854  | 385643  | 365902  |
| CMR | Cameroon | 12482 | Logone - Et - Chari | 0.29 | 0.33 | 0.34 | 292222  | 270493  | 260684  |
| CMR | Cameroon | 12483 | Mayo-Danay          | 0.29 | 0.33 | 0.34 | 369488  | 342014  | 329611  |
| CMR | Cameroon | 12484 | Mayo-Kani           | 0.29 | 0.33 | 0.34 | 274019  | 253644  | 244446  |
| CMR | Cameroon | 12485 | Mayo-Sava           | 0.29 | 0.33 | 0.34 | 199627  | 184783  | 178082  |
| CMR | Cameroon | 12486 | Mayo-Tsanaga        | 0.29 | 0.33 | 0.34 | 419193  | 388023  | 373952  |
| CMR | Cameroon | 12487 | Moungo              | 0.67 | 0.75 | 0.82 | 105540  | 39495   | 0       |
| CMR | Cameroon | 12488 | Nkam                | 0.67 | 0.75 | 0.82 | 14747   | 5519    | 0       |
| CMR | Cameroon | 12489 | Sanaga - Maritime   | 0.67 | 0.75 | 0.82 | 49822   | 18644   | 0       |
| CMR | Cameroon | 12490 | Wouril              | 0.29 | 0.33 | 0.34 | 1169425 | 1082471 | 1043216 |
| CMR | Cameroon | 12491 | Boyo                | 0.86 | 0.90 | 0.97 | 0       | 0       | 0       |
| CMR | Cameroon | 12492 | Bui                 | 0.86 | 0.90 | 0.97 | 0       | 0       | 0       |
| CMR | Cameroon | 12493 | Donga - Mantung     | 0.86 | 0.90 | 0.97 | 0       | 0       | 0       |
| CMR | Cameroon | 12494 | Menchum             | 0.86 | 0.90 | 0.97 | 0       | 0       | 0       |
| CMR | Cameroon | 12495 | Mezam               | 0.86 | 0.90 | 0.97 | 0       | 0       | 0       |
| CMR | Cameroon | 12496 | Momo                | 0.86 | 0.90 | 0.97 | 0       | 0       | 0       |
| CMR | Cameroon | 12497 | Ngo-Ketunjia        | 0.86 | 0.90 | 0.97 | 0       | 0       | 0       |
| CMR | Cameroon | 12498 | Bénoue              | 0.92 | 0.94 | 0.99 | 0       | 0       | 0       |
| CMR | Cameroon | 12499 | Faro                | 0.92 | 0.94 | 0.99 | 0       | 0       | 0       |
| CMR | Cameroon | 12500 | Mayo-Louti          | 0.92 | 0.94 | 0.99 | 0       | 0       | 0       |
| CMR | Cameroon | 12501 | Mayo - Rey          | 0.92 | 0.94 | 0.99 | 0       | 0       | 0       |
| CMR | Cameroon | 12502 | Bamboutos           | 0.93 | 0.98 | 0.99 | 0       | 0       | 0       |
| CMR | Cameroon | 12503 | Haut-Nkam           | 0.93 | 0.98 | 0.99 | 0       | 0       | 0       |
| CMR | Cameroon | 12504 | Hauts-Plateaux      | 0.93 | 0.98 | 0.99 | 0       | 0       | 0       |
| CMR | Cameroon | 12505 | Koung-Khi           | 0.93 | 0.99 | 0.99 | 0       | 0       | 0       |
| CMR | Cameroon | 12506 | Ménoua              | 0.93 | 0.99 | 0.99 | 0       | 0       | 0       |
| CMR | Cameroon | 12507 | Mifi                | 0.93 | 0.98 | 0.99 | 0       | 0       | 0       |
| CMR | Cameroon | 12508 | Nde                 | 0.93 | 0.98 | 0.99 | 0       | 0       | 0       |
| CMR | Cameroon | 12509 | Noun                | 0.93 | 0.98 | 0.99 | 0       | 0       | 0       |
| CMR | Cameroon | 12510 | Fako                | 0.83 | 0.93 | 0.98 | 0       | 0       | 0       |
| CMR | Cameroon | 12511 | Kupé Manenguba      | 0.83 | 0.88 | 0.94 | 0       | 0       | 0       |
| CMR | Cameroon | 12512 | Lebialem            | 0.83 | 0.88 | 0.94 | 0       | 0       | 0       |

|     |                                  |       |                                |      |      |      |         |         |         |
|-----|----------------------------------|-------|--------------------------------|------|------|------|---------|---------|---------|
| CMR | Cameroon                         | 12513 | Manyu                          | 0.83 | 0.88 | 0.94 | 0       | 0       | 0       |
| CMR | Cameroon                         | 12514 | Meme                           | 0.83 | 0.93 | 0.98 | 0       | 0       | 0       |
| CMR | Cameroon                         | 12515 | Ndian                          | 0.83 | 0.88 | 0.94 | 0       | 0       | 0       |
| CMR | Cameroon                         | 12516 | Dja - Et - Lobo                | 0.84 | 0.91 | 0.99 | 0       | 0       | 0       |
| CMR | Cameroon                         | 12517 | Mvila                          | 0.84 | 0.89 | 0.95 | 0       | 0       | 0       |
| CMR | Cameroon                         | 12518 | Océan                          | 0.84 | 0.89 | 0.95 | 0       | 0       | 0       |
| CMR | Cameroon                         | 12519 | Vallée - Du - Ntem             | 0.84 | 0.89 | 0.95 | 0       | 0       | 0       |
| COD | Democratic Republic of the Congo | 14959 | Bandundu (city)                | 0.24 | 0.24 | 0.24 | 94955   | 94955   | 94955   |
| COD | Democratic Republic of the Congo | 14960 | Kwango                         | 0.54 | 0.63 | 0.71 | 451282  | 297290  | 147151  |
| COD | Democratic Republic of the Congo | 14961 | Kwilu                          | 0.24 | 0.24 | 0.24 | 2318148 | 2318148 | 2318148 |
| COD | Democratic Republic of the Congo | 14965 | Cataractes                     | 0.54 | 0.63 | 0.71 | 266529  | 175581  | 86908   |
| COD | Democratic Republic of the Congo | 14966 | Lukaya                         | 0.54 | 0.63 | 0.71 | 156584  | 103153  | 51058   |
| COD | Democratic Republic of the Congo | 14967 | Matadi (city)                  | 0.24 | 0.24 | 0.24 | 81913   | 81913   | 81913   |
| COD | Democratic Republic of the Congo | 14968 | Equateur                       | 0.24 | 0.24 | 0.24 | 820593  | 820593  | 820593  |
| COD | Democratic Republic of the Congo | 14969 | Mbandaka (city)                | 0.24 | 0.24 | 0.24 | 26804   | 26804   | 26804   |
| COD | Democratic Republic of the Congo | 14970 | Mongala                        | 0.24 | 0.24 | 0.24 | 858258  | 858258  | 858258  |
| COD | Democratic Republic of the Congo | 14971 | Nord-Ubangi                    | 0.24 | 0.24 | 0.24 | 566552  | 566552  | 566552  |
| COD | Democratic Republic of the Congo | 14972 | Sud-Ubangi                     | 0.32 | 0.32 | 0.32 | 975245  | 971082  | 964719  |
| COD | Democratic Republic of the Congo | 14973 | Tshuapa                        | 0.24 | 0.24 | 0.24 | 589842  | 589842  | 589842  |
| COD | Democratic Republic of the Congo | 14974 | Kananga (city)                 | 0.24 | 0.24 | 0.24 | 139388  | 139388  | 139388  |
| COD | Democratic Republic of the Congo | 14976 | Lulua                          | 0.54 | 0.63 | 0.71 | 739267  | 487006  | 241055  |
| COD | Democratic Republic of the Congo | 14978 | Mbuji-Mayi (city)              | 0.24 | 0.24 | 0.24 | 517613  | 517613  | 517613  |
| COD | Democratic Republic of the Congo | 14979 | Sankuru                        | 0.24 | 0.24 | 0.24 | 1249662 | 1249662 | 1249662 |
| COD | Democratic Republic of the Congo | 14980 | Tshilenge                      | 0.24 | 0.24 | 0.24 | 1147667 | 1147667 | 1147667 |
| COD | Democratic Republic of the Congo | 14981 | Haut-Lomami                    | 0.41 | 0.58 | 0.70 | 1165325 | 647100  | 284235  |
| COD | Democratic Republic of the Congo | 14982 | Haut-Katanga                   | 0.24 | 0.24 | 0.24 | 1065345 | 1065345 | 1065345 |
| COD | Democratic Republic of the Congo | 14983 | Kolwezi                        | 0.24 | 0.24 | 0.24 | 495098  | 495098  | 495098  |
| COD | Democratic Republic of the Congo | 14984 | Lualaba                        | 0.54 | 0.63 | 0.71 | 236871  | 156043  | 77237   |
| COD | Democratic Republic of the Congo | 14985 | Lubumbashi (city)              | 0.24 | 0.24 | 0.24 | 227500  | 227500  | 227500  |
| COD | Democratic Republic of the Congo | 14986 | Tanganyika                     | 0.24 | 0.24 | 0.24 | 1121929 | 1121929 | 1121929 |
| COD | Democratic Republic of the Congo | 14987 | Kinshasa                       | 0.54 | 0.63 | 0.71 | 1957811 | 1289744 | 638388  |
| COD | Democratic Republic of the Congo | 14988 | Under 1st level administration | 0.24 | 0.24 | 0.24 | 983367  | 983367  | 983367  |
| COD | Democratic Republic of the Congo | 14989 | Under 1st level administration | 0.24 | 0.24 | 0.24 | 2443552 | 2443552 | 2443552 |



|     |                                  |       |                                |      |      |      |         |         |         |
|-----|----------------------------------|-------|--------------------------------|------|------|------|---------|---------|---------|
| COD | Democratic Republic of the Congo | 14990 | Bas-Uele                       | 0.35 | 0.57 | 0.71 | 446147  | 229503  | 92082   |
| COD | Democratic Republic of the Congo | 14991 | Haut-Uele                      | 0.24 | 0.24 | 0.24 | 3527370 | 3527370 | 3527370 |
| COD | Democratic Republic of the Congo | 14992 | Ituri                          | 0.24 | 0.24 | 0.24 | 2242436 | 2242436 | 2242436 |
| COD | Democratic Republic of the Congo | 14993 | Kisangani (city)               | 0.24 | 0.24 | 0.24 | 623837  | 623837  | 623837  |
| COD | Democratic Republic of the Congo | 14994 | Tshopo                         | 0.24 | 0.24 | 0.24 | 924078  | 924078  | 924078  |
| COD | Democratic Republic of the Congo | 14995 | Under 1st level administration | 0.24 | 0.24 | 0.24 | 2518426 | 2518426 | 2518426 |
| COD | Democratic Republic of the Congo | 74352 | Bas-Fleuve                     | 0.54 | 0.63 | 0.71 | 270088  | 177925  | 88068   |
| COD | Democratic Republic of the Congo | 74353 | Boma (city)                    | 0.24 | 0.24 | 0.24 | 81503   | 81503   | 81503   |
| COD | Democratic Republic of the Congo | 74354 | Bukavu (city)                  | 0.24 | 0.24 | 0.24 | 112902  | 112902  | 112902  |
| COD | Democratic Republic of the Congo | 74355 | Gbadolite (city)               | 0.24 | 0.24 | 0.24 | 61638   | 61638   | 61638   |
| COD | Democratic Republic of the Congo | 74356 | Goma (city)                    | 0.24 | 0.24 | 0.24 | 137822  | 137822  | 137822  |
| COD | Democratic Republic of the Congo | 74357 | Kikwit (city)                  | 0.24 | 0.24 | 0.24 | 159889  | 159889  | 159889  |
| COD | Democratic Republic of the Congo | 74358 | Kindu (city)                   | 0.24 | 0.24 | 0.24 | 113997  | 113997  | 113997  |
| COD | Democratic Republic of the Congo | 74359 | Kolwezi (city)                 | 0.24 | 0.24 | 0.24 | 130827  | 130827  | 130827  |
| COD | Democratic Republic of the Congo | 74360 | Likasi (city)                  | 0.24 | 0.24 | 0.24 | 19190   | 19190   | 19190   |
| COD | Democratic Republic of the Congo | 74361 | Mai-Ndombe                     | 0.24 | 0.24 | 0.24 | 618782  | 618782  | 618782  |
| COD | Democratic Republic of the Congo | 74362 | Mwene-Ditu (city)              | 0.24 | 0.24 | 0.24 | 75632   | 75632   | 75632   |
| COD | Democratic Republic of the Congo | 74363 | Plateaux                       | 0.24 | 0.24 | 0.24 | 250198  | 250198  | 250198  |
| COD | Democratic Republic of the Congo | 74364 | Tshikapa (city)                | 0.24 | 0.24 | 0.24 | 314272  | 314272  | 314272  |
| COD | Democratic Republic of the Congo | 74365 | Zongo (city)                   | 0.24 | 0.24 | 0.24 | 43456   | 43456   | 43456   |
| COD | Democratic Republic of the Congo | 74366 | Kabinda                        | 0.41 | 0.45 | 0.50 | 933330  | 822827  | 704918  |
| COD | Democratic Republic of the Congo | 74367 | Kasai                          | 0.54 | 0.63 | 0.71 | 591638  | 389753  | 192917  |
| COG | Congo                            | 14423 | Boko-songho                    | 0.16 | 0.34 | 0.43 | 3569    | 2571    | 2062    |
| COG | Congo                            | 14424 | Loudima                        | 0.16 | 0.34 | 0.43 | 46945   | 33822   | 27122   |
| COG | Congo                            | 14425 | Madingou                       | 0.16 | 0.34 | 0.43 | 45209   | 32571   | 26119   |
| COG | Congo                            | 14426 | Mfouati                        | 0.16 | 0.34 | 0.43 | 4444    | 3202    | 2568    |
| COG | Congo                            | 14427 | Mouyondzi                      | 0.16 | 0.34 | 0.43 | 66773   | 48107   | 38578   |
| COG | Congo                            | 14428 | Nkayi District                 | 0.16 | 0.34 | 0.43 | 29415   | 21193   | 16994   |
| COG | Congo                            | 14429 | Ewo                            | 0.58 | 0.70 | 0.76 | 1568    | 686     | 271     |
| COG | Congo                            | 14430 | Kelle                          | 0.58 | 0.70 | 0.76 | 1594    | 697     | 275     |
| COG | Congo                            | 14431 | Mbomo                          | 0.58 | 0.70 | 0.76 | 506     | 221     | 87      |
| COG | Congo                            | 14432 | Boundji                        | 0.16 | 0.34 | 0.43 | 3356    | 2418    | 1939    |
| COG | Congo                            | 14433 | Loukela                        | 0.16 | 0.34 | 0.43 | 1793    | 1292    | 1036    |

|     |       |       |                          |      |      |      |         |         |        |
|-----|-------|-------|--------------------------|------|------|------|---------|---------|--------|
| COG | Congo | 14434 | Makoua                   | 0.16 | 0.34 | 0.43 | 32106   | 23131   | 18549  |
| COG | Congo | 14435 | Mossaka                  | 0.16 | 0.34 | 0.43 | 31121   | 22422   | 17980  |
| COG | Congo | 14436 | Okoyo                    | 0.16 | 0.34 | 0.43 | 1926    | 1387    | 1113   |
| COG | Congo | 14437 | Owando                   | 0.16 | 0.34 | 0.43 | 45281   | 32623   | 26161  |
| COG | Congo | 14438 | Kakamoeka                | 0.16 | 0.34 | 0.43 | 5240    | 3776    | 3028   |
| COG | Congo | 14439 | Loandjili (pointe Noire) | 0.16 | 0.34 | 0.43 | 720654  | 519204  | 416355 |
| COG | Congo | 14440 | Madingo-kayes            | 0.16 | 0.34 | 0.43 | 3389    | 2442    | 1958   |
| COG | Congo | 14441 | Mvouti                   | 0.16 | 0.34 | 0.43 | 8147    | 5869    | 4707   |
| COG | Congo | 14442 | Bambama                  | 0.16 | 0.34 | 0.43 | 1041    | 750     | 601    |
| COG | Congo | 14443 | Komono                   | 0.16 | 0.34 | 0.43 | 2827    | 2037    | 1633   |
| COG | Congo | 14444 | Sibiti                   | 0.16 | 0.34 | 0.43 | 34564   | 24902   | 19969  |
| COG | Congo | 14445 | Zanaga                   | 0.16 | 0.34 | 0.43 | 3470    | 2500    | 2005   |
| COG | Congo | 14446 | Dongou                   | 0.16 | 0.34 | 0.43 | 9345    | 6733    | 5399   |
| COG | Congo | 14447 | Epena                    | 0.16 | 0.34 | 0.43 | 4746    | 3420    | 2742   |
| COG | Congo | 14448 | Impfondo                 | 0.16 | 0.34 | 0.43 | 26654   | 19203   | 15399  |
| COG | Congo | 14449 | Divenie                  | 0.16 | 0.34 | 0.43 | 6310    | 4546    | 3646   |
| COG | Congo | 14450 | Kibangou                 | 0.16 | 0.34 | 0.43 | 4961    | 3575    | 2866   |
| COG | Congo | 14451 | Kimongo                  | 0.16 | 0.34 | 0.43 | 7308    | 5265    | 4222   |
| COG | Congo | 14452 | Louvakou (loubomo)       | 0.16 | 0.34 | 0.43 | 117557  | 84696   | 67918  |
| COG | Congo | 14453 | Mayoko                   | 0.16 | 0.34 | 0.43 | 3140    | 2262    | 1814   |
| COG | Congo | 14454 | Mossendjo                | 0.16 | 0.34 | 0.43 | 16049   | 11563   | 9272   |
| COG | Congo | 14455 | Abala                    | 0.16 | 0.34 | 0.43 | 8876    | 6395    | 5128   |
| COG | Congo | 14456 | Djambala                 | 0.16 | 0.34 | 0.43 | 24618   | 17736   | 14223  |
| COG | Congo | 14457 | Gamboma                  | 0.16 | 0.34 | 0.43 | 53455   | 38512   | 30883  |
| COG | Congo | 14458 | Lekana                   | 0.16 | 0.34 | 0.43 | 4159    | 2996    | 2403   |
| COG | Congo | 14459 | Boko                     | 0.16 | 0.34 | 0.43 | 15151   | 10915   | 8753   |
| COG | Congo | 14460 | Kindamba                 | 0.16 | 0.34 | 0.43 | 11116   | 8008    | 6422   |
| COG | Congo | 14461 | Kinkala                  | 0.16 | 0.34 | 0.43 | 44627   | 32152   | 25783  |
| COG | Congo | 14462 | Mayama                   | 0.16 | 0.34 | 0.43 | 7241    | 5217    | 4183   |
| COG | Congo | 14463 | Mindouli                 | 0.16 | 0.34 | 0.43 | 16078   | 11584   | 9289   |
| COG | Congo | 14464 | Ngabe                    | 0.16 | 0.34 | 0.43 | 9853    | 7099    | 5693   |
| COG | Congo | 14465 | Ngamaba (brazzaville)    | 0.16 | 0.34 | 0.43 | 1497420 | 1078835 | 865128 |
| COG | Congo | 14466 | Ouessou                  | 0.16 | 0.34 | 0.43 | 24557   | 17693   | 14188  |

|     |          |       |                  |      |      |      |        |        |        |
|-----|----------|-------|------------------|------|------|------|--------|--------|--------|
| COG | Congo    | 14467 | Sembe            | 0.16 | 0.34 | 0.43 | 4889   | 3522   | 2825   |
| COG | Congo    | 14468 | Souanke          | 0.16 | 0.34 | 0.43 | 4630   | 3336   | 2675   |
| COL | Colombia | 13333 | El Encanto       | 0.14 | 0.14 | 0.14 | 2405   | 2405   | 2405   |
| COL | Colombia | 13334 | La Chorrera      | 0.14 | 0.14 | 0.14 | 6128   | 6128   | 6128   |
| COL | Colombia | 13335 | La Pedrera       | 0.14 | 0.14 | 0.14 | 4390   | 4390   | 4390   |
| COL | Colombia | 13336 | Leticia          | 0.14 | 0.14 | 0.14 | 24828  | 24828  | 24828  |
| COL | Colombia | 13337 | Miriti Parana    | 0.14 | 0.14 | 0.14 | 2877   | 2877   | 2877   |
| COL | Colombia | 13338 | Puerto Narino    | 0.14 | 0.14 | 0.14 | 9779   | 9779   | 9779   |
| COL | Colombia | 13339 | Puerto Santander | 0.14 | 0.14 | 0.14 | 1153   | 1153   | 1153   |
| COL | Colombia | 13340 | Tarapaca         | 0.14 | 0.14 | 0.14 | 12993  | 12993  | 12993  |
| COL | Colombia | 13341 | Abejorral        | 0.14 | 0.14 | 0.14 | 15600  | 15600  | 15600  |
| COL | Colombia | 13342 | Abriaqui         | 0.14 | 0.14 | 0.14 | 2069   | 2069   | 2069   |
| COL | Colombia | 13343 | Alejandro        | 0.14 | 0.14 | 0.14 | 3204   | 3204   | 3204   |
| COL | Colombia | 13344 | Amaga            | 0.14 | 0.14 | 0.14 | 18204  | 18204  | 18204  |
| COL | Colombia | 13345 | Amalfi           | 0.14 | 0.14 | 0.14 | 14877  | 14877  | 14877  |
| COL | Colombia | 13346 | Andes            | 0.14 | 0.14 | 0.14 | 27036  | 27036  | 27036  |
| COL | Colombia | 13347 | Angelopolis      | 0.14 | 0.14 | 0.14 | 5685   | 5685   | 5685   |
| COL | Colombia | 13348 | Angostura        | 0.14 | 0.14 | 0.14 | 10451  | 10451  | 10451  |
| COL | Colombia | 13349 | Anori            | 0.14 | 0.14 | 0.14 | 13291  | 13291  | 13291  |
| COL | Colombia | 13350 | Antioquia        | 0.14 | 0.14 | 0.14 | 14308  | 14308  | 14308  |
| COL | Colombia | 13351 | Anza             | 0.14 | 0.14 | 0.14 | 4885   | 4885   | 4885   |
| COL | Colombia | 13352 | Apartado         | 0.14 | 0.14 | 0.14 | 89694  | 89694  | 89694  |
| COL | Colombia | 13353 | Arboletes        | 0.14 | 0.14 | 0.14 | 14919  | 14919  | 14919  |
| COL | Colombia | 13354 | Argelia          | 0.14 | 0.14 | 0.14 | 6717   | 6717   | 6717   |
| COL | Colombia | 13355 | Armenia          | 0.14 | 0.14 | 0.14 | 5146   | 5146   | 5146   |
| COL | Colombia | 13356 | Barbosa          | 0.14 | 0.14 | 0.14 | 34610  | 34610  | 34610  |
| COL | Colombia | 13357 | Bello            | 0.14 | 0.14 | 0.14 | 289264 | 289264 | 289264 |
| COL | Colombia | 13358 | Belmira          | 0.14 | 0.14 | 0.14 | 7176   | 7176   | 7176   |
| COL | Colombia | 13359 | Betania          | 0.14 | 0.14 | 0.14 | 8427   | 8427   | 8427   |
| COL | Colombia | 13360 | Betulia          | 0.14 | 0.14 | 0.14 | 10217  | 10217  | 10217  |
| COL | Colombia | 13361 | Bolivar          | 0.14 | 0.14 | 0.14 | 20859  | 20859  | 20859  |
| COL | Colombia | 13362 | Briceno          | 0.14 | 0.14 | 0.14 | 6378   | 6378   | 6378   |
| COL | Colombia | 13363 | Buritica         | 0.14 | 0.14 | 0.14 | 4488   | 4488   | 4488   |

|     |          |       |                   |      |      |      |        |        |        |
|-----|----------|-------|-------------------|------|------|------|--------|--------|--------|
| COL | Colombia | 13364 | Caceres           | 0.14 | 0.14 | 0.14 | 23958  | 23958  | 23958  |
| COL | Colombia | 13365 | Caicedo           | 0.14 | 0.14 | 0.14 | 6278   | 6278   | 6278   |
| COL | Colombia | 13366 | Caldas            | 0.14 | 0.14 | 0.14 | 46517  | 46517  | 46517  |
| COL | Colombia | 13367 | Campamento        | 0.14 | 0.14 | 0.14 | 7714   | 7714   | 7714   |
| COL | Colombia | 13368 | Canasgordas       | 0.14 | 0.14 | 0.14 | 13920  | 13920  | 13920  |
| COL | Colombia | 13369 | Caracoli          | 0.14 | 0.14 | 0.14 | 5046   | 5046   | 5046   |
| COL | Colombia | 13370 | Caramanta         | 0.14 | 0.14 | 0.14 | 5566   | 5566   | 5566   |
| COL | Colombia | 13371 | Carepa            | 0.14 | 0.14 | 0.14 | 21595  | 21595  | 21595  |
| COL | Colombia | 13372 | Carmen De Viboral | 0.14 | 0.14 | 0.14 | 32378  | 32378  | 32378  |
| COL | Colombia | 13373 | Carolina          | 0.14 | 0.14 | 0.14 | 3058   | 3058   | 3058   |
| COL | Colombia | 13374 | Caucasia          | 0.14 | 0.14 | 0.14 | 56980  | 56980  | 56980  |
| COL | Colombia | 13375 | Chigorodo         | 0.14 | 0.14 | 0.14 | 42006  | 42006  | 42006  |
| COL | Colombia | 13376 | Cisneros          | 0.14 | 0.14 | 0.14 | 4639   | 4639   | 4639   |
| COL | Colombia | 13377 | Cocorna           | 0.14 | 0.14 | 0.14 | 13956  | 13956  | 13956  |
| COL | Colombia | 13378 | Concepcion        | 0.14 | 0.14 | 0.14 | 4119   | 4119   | 4119   |
| COL | Colombia | 13379 | Concordia         | 0.14 | 0.14 | 0.14 | 12527  | 12527  | 12527  |
| COL | Colombia | 13380 | Copacabana        | 0.14 | 0.14 | 0.14 | 65250  | 65250  | 65250  |
| COL | Colombia | 13381 | Dabeiba           | 0.14 | 0.14 | 0.14 | 16132  | 16132  | 16132  |
| COL | Colombia | 13382 | Don Matias        | 0.14 | 0.14 | 0.14 | 14823  | 14823  | 14823  |
| COL | Colombia | 13383 | Ebejico           | 0.14 | 0.14 | 0.14 | 7884   | 7884   | 7884   |
| COL | Colombia | 13384 | El Bagre          | 0.14 | 0.14 | 0.14 | 38614  | 38614  | 38614  |
| COL | Colombia | 13385 | Entrerrios        | 0.14 | 0.14 | 0.14 | 5414   | 5414   | 5414   |
| COL | Colombia | 13386 | Envigado          | 0.14 | 0.14 | 0.14 | 123977 | 123977 | 123977 |
| COL | Colombia | 13387 | Fredonia          | 0.14 | 0.14 | 0.14 | 14440  | 14440  | 14440  |
| COL | Colombia | 13388 | Frontino          | 0.14 | 0.14 | 0.14 | 14882  | 14882  | 14882  |
| COL | Colombia | 13389 | Giraldo           | 0.14 | 0.14 | 0.14 | 2437   | 2437   | 2437   |
| COL | Colombia | 13390 | Girardota         | 0.14 | 0.14 | 0.14 | 36316  | 36316  | 36316  |
| COL | Colombia | 13391 | Gomez Plata       | 0.14 | 0.14 | 0.14 | 9743   | 9743   | 9743   |
| COL | Colombia | 13392 | Granada           | 0.14 | 0.14 | 0.14 | 12912  | 12912  | 12912  |
| COL | Colombia | 13393 | Guadalupe         | 0.14 | 0.14 | 0.14 | 2958   | 2958   | 2958   |
| COL | Colombia | 13394 | Guarne            | 0.14 | 0.14 | 0.14 | 139968 | 139968 | 139968 |
| COL | Colombia | 13395 | Guatape           | 0.14 | 0.14 | 0.14 | 4076   | 4076   | 4076   |
| COL | Colombia | 13396 | Heliconia         | 0.14 | 0.14 | 0.14 | 4632   | 4632   | 4632   |

|     |          |       |                     |      |      |      |         |         |         |
|-----|----------|-------|---------------------|------|------|------|---------|---------|---------|
| COL | Colombia | 13397 | Hispania            | 0.14 | 0.14 | 0.14 | 2365    | 2365    | 2365    |
| COL | Colombia | 13398 | Itagui              | 0.14 | 0.14 | 0.14 | 139935  | 139935  | 139935  |
| COL | Colombia | 13399 | Ituango             | 0.14 | 0.14 | 0.14 | 18214   | 18214   | 18214   |
| COL | Colombia | 13400 | Jardin              | 0.14 | 0.14 | 0.14 | 13860   | 13860   | 13860   |
| COL | Colombia | 13401 | Jerico              | 0.14 | 0.14 | 0.14 | 8507    | 8507    | 8507    |
| COL | Colombia | 13402 | La Ceja             | 0.14 | 0.14 | 0.14 | 26605   | 26605   | 26605   |
| COL | Colombia | 13403 | La Estrella         | 0.14 | 0.14 | 0.14 | 30901   | 30901   | 30901   |
| COL | Colombia | 13404 | La Union            | 0.14 | 0.14 | 0.14 | 19680   | 19680   | 19680   |
| COL | Colombia | 13405 | Liborina            | 0.14 | 0.14 | 0.14 | 7131    | 7131    | 7131    |
| COL | Colombia | 13406 | Maceo               | 0.14 | 0.14 | 0.14 | 6447    | 6447    | 6447    |
| COL | Colombia | 13407 | Marinilla           | 0.14 | 0.14 | 0.14 | 29630   | 29630   | 29630   |
| COL | Colombia | 13408 | Medellin            | 0.14 | 0.14 | 0.14 | 1371317 | 1371317 | 1371317 |
| COL | Colombia | 13409 | Montebello          | 0.14 | 0.14 | 0.14 | 5814    | 5814    | 5814    |
| COL | Colombia | 13410 | Murindo             | 0.14 | 0.14 | 0.14 | 3854    | 3854    | 3854    |
| COL | Colombia | 13411 | Mutata              | 0.14 | 0.14 | 0.14 | 13953   | 13953   | 13953   |
| COL | Colombia | 13412 | Narino              | 0.14 | 0.14 | 0.14 | 9897    | 9897    | 9897    |
| COL | Colombia | 13413 | Nechi               | 0.14 | 0.14 | 0.14 | 8606    | 8606    | 8606    |
| COL | Colombia | 13414 | Necocli             | 0.14 | 0.14 | 0.14 | 33265   | 33265   | 33265   |
| COL | Colombia | 13416 | Olaya               | 0.14 | 0.14 | 0.14 | 3342    | 3342    | 3342    |
| COL | Colombia | 13417 | Penol               | 0.14 | 0.14 | 0.14 | 18485   | 18485   | 18485   |
| COL | Colombia | 13418 | Peque               | 0.14 | 0.14 | 0.14 | 6139    | 6139    | 6139    |
| COL | Colombia | 13419 | Pto Nare (la Magd.) | 0.14 | 0.14 | 0.14 | 11487   | 11487   | 11487   |
| COL | Colombia | 13420 | Pueblorrico         | 0.14 | 0.14 | 0.14 | 8373    | 8373    | 8373    |
| COL | Colombia | 13421 | Puerto Berrio       | 0.14 | 0.14 | 0.14 | 26031   | 26031   | 26031   |
| COL | Colombia | 13422 | Puerto Triunfo      | 0.14 | 0.14 | 0.14 | 10828   | 10828   | 10828   |
| COL | Colombia | 13423 | Remedios            | 0.14 | 0.14 | 0.14 | 17058   | 17058   | 17058   |
| COL | Colombia | 13424 | Retiro              | 0.14 | 0.14 | 0.14 | 92365   | 92365   | 92365   |
| COL | Colombia | 13425 | Rionegro            | 0.14 | 0.14 | 0.14 | 90578   | 90578   | 90578   |
| COL | Colombia | 13426 | Sabanalarga         | 0.14 | 0.14 | 0.14 | 5490    | 5490    | 5490    |
| COL | Colombia | 13427 | Sabaneta            | 0.14 | 0.14 | 0.14 | 30203   | 30203   | 30203   |
| COL | Colombia | 13428 | Salgar              | 0.14 | 0.14 | 0.14 | 14936   | 14936   | 14936   |
| COL | Colombia | 13429 | San Andres          | 0.14 | 0.14 | 0.14 | 4245    | 4245    | 4245    |
| COL | Colombia | 13430 | San Carlos          | 0.14 | 0.14 | 0.14 | 12831   | 12831   | 12831   |

|     |          |       |                        |      |      |      |       |       |       |
|-----|----------|-------|------------------------|------|------|------|-------|-------|-------|
| COL | Colombia | 13431 | San Francisco          | 0.14 | 0.14 | 0.14 | 5422  | 5422  | 5422  |
| COL | Colombia | 13432 | San Jeronimo           | 0.14 | 0.14 | 0.14 | 7493  | 7493  | 7493  |
| COL | Colombia | 13433 | San Jose De La Montana | 0.14 | 0.14 | 0.14 | 3563  | 3563  | 3563  |
| COL | Colombia | 13434 | San Juan De Uraba      | 0.14 | 0.14 | 0.14 | 14340 | 14340 | 14340 |
| COL | Colombia | 13435 | San Luis               | 0.14 | 0.14 | 0.14 | 7173  | 7173  | 7173  |
| COL | Colombia | 13436 | San Pedro              | 0.14 | 0.14 | 0.14 | 28800 | 28800 | 28800 |
| COL | Colombia | 13437 | San Pedro De Uraba     | 0.14 | 0.14 | 0.14 | 25928 | 25928 | 25928 |
| COL | Colombia | 13438 | San Rafael             | 0.14 | 0.14 | 0.14 | 10356 | 10356 | 10356 |
| COL | Colombia | 13439 | San Roque              | 0.14 | 0.14 | 0.14 | 13011 | 13011 | 13011 |
| COL | Colombia | 13440 | San Vicente            | 0.14 | 0.14 | 0.14 | 17831 | 17831 | 17831 |
| COL | Colombia | 13441 | Santa Barbara          | 0.14 | 0.14 | 0.14 | 19586 | 19586 | 19586 |
| COL | Colombia | 13442 | Santa Rosa De Osos     | 0.14 | 0.14 | 0.14 | 23673 | 23673 | 23673 |
| COL | Colombia | 13443 | Santo Domingo          | 0.14 | 0.14 | 0.14 | 9473  | 9473  | 9473  |
| COL | Colombia | 13444 | Santuario              | 0.14 | 0.14 | 0.14 | 13510 | 13510 | 13510 |
| COL | Colombia | 13445 | Segovia                | 0.14 | 0.14 | 0.14 | 25531 | 25531 | 25531 |
| COL | Colombia | 13446 | Sonson                 | 0.14 | 0.14 | 0.14 | 28403 | 28403 | 28403 |
| COL | Colombia | 13447 | Sopetran               | 0.14 | 0.14 | 0.14 | 8148  | 8148  | 8148  |
| COL | Colombia | 13448 | Tamesis                | 0.14 | 0.14 | 0.14 | 12452 | 12452 | 12452 |
| COL | Colombia | 13449 | Taraza                 | 0.14 | 0.14 | 0.14 | 21799 | 21799 | 21799 |
| COL | Colombia | 13450 | Tarso                  | 0.14 | 0.14 | 0.14 | 6845  | 6845  | 6845  |
| COL | Colombia | 13451 | Titiribi               | 0.14 | 0.14 | 0.14 | 9858  | 9858  | 9858  |
| COL | Colombia | 13452 | Toledo                 | 0.14 | 0.14 | 0.14 | 4374  | 4374  | 4374  |
| COL | Colombia | 13453 | Turbo                  | 0.14 | 0.14 | 0.14 | 99256 | 99256 | 99256 |
| COL | Colombia | 13455 | Uramita                | 0.14 | 0.14 | 0.14 | 3813  | 3813  | 3813  |
| COL | Colombia | 13456 | Urrao                  | 0.14 | 0.14 | 0.14 | 31409 | 31409 | 31409 |
| COL | Colombia | 13457 | Valdivia               | 0.14 | 0.14 | 0.14 | 11463 | 11463 | 11463 |
| COL | Colombia | 13458 | Valparaiso             | 0.14 | 0.14 | 0.14 | 4850  | 4850  | 4850  |
| COL | Colombia | 13459 | Vegachi                | 0.14 | 0.14 | 0.14 | 7913  | 7913  | 7913  |
| COL | Colombia | 13460 | Venecia                | 0.14 | 0.14 | 0.14 | 9513  | 9513  | 9513  |
| COL | Colombia | 13461 | Vigia Del Fuerte       | 0.14 | 0.14 | 0.14 | 5222  | 5222  | 5222  |
| COL | Colombia | 13462 | Yali                   | 0.14 | 0.14 | 0.14 | 6390  | 6390  | 6390  |
| COL | Colombia | 13463 | Yarumal                | 0.14 | 0.14 | 0.14 | 28049 | 28049 | 28049 |
| COL | Colombia | 13464 | Yolombo                | 0.14 | 0.14 | 0.14 | 15756 | 15756 | 15756 |

|     |          |       |                          |      |      |      |        |        |        |
|-----|----------|-------|--------------------------|------|------|------|--------|--------|--------|
| COL | Colombia | 13465 | Yondo                    | 0.14 | 0.14 | 0.14 | 12502  | 12502  | 12502  |
| COL | Colombia | 13466 | Zaragoza                 | 0.14 | 0.14 | 0.14 | 16791  | 16791  | 16791  |
| COL | Colombia | 13467 | Arauca                   | 0.14 | 0.14 | 0.14 | 69549  | 69549  | 69549  |
| COL | Colombia | 13468 | Araucuita                | 0.14 | 0.14 | 0.14 | 14428  | 14428  | 14428  |
| COL | Colombia | 13469 | Cravo Norte              | 0.14 | 0.14 | 0.14 | 4783   | 4783   | 4783   |
| COL | Colombia | 13470 | Fortul                   | 0.14 | 0.14 | 0.14 | 23869  | 23869  | 23869  |
| COL | Colombia | 13471 | Puerto Rondon            | 0.14 | 0.14 | 0.14 | 27731  | 27731  | 27731  |
| COL | Colombia | 13472 | Saravena                 | 0.14 | 0.14 | 0.14 | 33936  | 33936  | 33936  |
| COL | Colombia | 13473 | Tame                     | 0.14 | 0.14 | 0.14 | 39089  | 39089  | 39089  |
| COL | Colombia | 13474 | Baranoa                  | 0.14 | 0.14 | 0.14 | 35758  | 35758  | 35758  |
| COL | Colombia | 13475 | Barranquilla (dist.port. | 0.14 | 0.14 | 0.14 | 877153 | 877153 | 877153 |
| COL | Colombia | 13476 | Campo De La Cruz         | 0.14 | 0.14 | 0.14 | 10246  | 10246  | 10246  |
| COL | Colombia | 13477 | Candelaria               | 0.14 | 0.14 | 0.14 | 8425   | 8425   | 8425   |
| COL | Colombia | 13478 | Galapa                   | 0.14 | 0.14 | 0.14 | 63131  | 63131  | 63131  |
| COL | Colombia | 13479 | Juan De Acosta           | 0.14 | 0.14 | 0.14 | 11989  | 11989  | 11989  |
| COL | Colombia | 13480 | Luruaco                  | 0.14 | 0.14 | 0.14 | 18624  | 18624  | 18624  |
| COL | Colombia | 13481 | Malambo                  | 0.14 | 0.14 | 0.14 | 85416  | 85416  | 85416  |
| COL | Colombia | 13482 | Manati                   | 0.14 | 0.14 | 0.14 | 12303  | 12303  | 12303  |
| COL | Colombia | 13483 | Palmar De Varela         | 0.14 | 0.14 | 0.14 | 11330  | 11330  | 11330  |
| COL | Colombia | 13484 | Piojo                    | 0.14 | 0.14 | 0.14 | 3515   | 3515   | 3515   |
| COL | Colombia | 13485 | Polo Nuevo               | 0.14 | 0.14 | 0.14 | 11464  | 11464  | 11464  |
| COL | Colombia | 13486 | Ponedera                 | 0.14 | 0.14 | 0.14 | 14532  | 14532  | 14532  |
| COL | Colombia | 13487 | Puerto Colombia          | 0.14 | 0.14 | 0.14 | 47001  | 47001  | 47001  |
| COL | Colombia | 13488 | Repelon                  | 0.14 | 0.14 | 0.14 | 21205  | 21205  | 21205  |
| COL | Colombia | 13489 | Sabanagrande             | 0.14 | 0.14 | 0.14 | 14501  | 14501  | 14501  |
| COL | Colombia | 13490 | Sabanalarga              | 0.14 | 0.14 | 0.14 | 62759  | 62759  | 62759  |
| COL | Colombia | 13491 | Santa Lucia              | 0.14 | 0.14 | 0.14 | 6302   | 6302   | 6302   |
| COL | Colombia | 13492 | Santo Tomas              | 0.14 | 0.14 | 0.14 | 13059  | 13059  | 13059  |
| COL | Colombia | 13493 | Soledad                  | 0.14 | 0.14 | 0.14 | 299296 | 299296 | 299296 |
| COL | Colombia | 13494 | Suan                     | 0.14 | 0.14 | 0.14 | 2910   | 2910   | 2910   |
| COL | Colombia | 13495 | Tubara                   | 0.14 | 0.14 | 0.14 | 12054  | 12054  | 12054  |
| COL | Colombia | 13496 | Usiacuri                 | 0.14 | 0.14 | 0.14 | 4995   | 4995   | 4995   |
| COL | Colombia | 13497 | Achi                     | 0.14 | 0.14 | 0.14 | 27336  | 27336  | 27336  |

|     |          |       |                           |      |      |      |        |        |        |
|-----|----------|-------|---------------------------|------|------|------|--------|--------|--------|
| COL | Colombia | 13498 | Altos Del Rosario         | 0.14 | 0.14 | 0.14 | 11949  | 11949  | 11949  |
| COL | Colombia | 13499 | Arjona                    | 0.14 | 0.14 | 0.14 | 40745  | 40745  | 40745  |
| COL | Colombia | 13500 | Barranco De Loba          | 0.14 | 0.14 | 0.14 | 12184  | 12184  | 12184  |
| COL | Colombia | 13501 | Calamar                   | 0.14 | 0.14 | 0.14 | 18112  | 18112  | 18112  |
| COL | Colombia | 13502 | Cantagallo                | 0.14 | 0.14 | 0.14 | 9433   | 9433   | 9433   |
| COL | Colombia | 13503 | Cartagena (dist. Esp.)    | 0.14 | 0.14 | 0.14 | 616735 | 616735 | 616735 |
| COL | Colombia | 13504 | Cartagena (dist. Esp.) (i | 0.14 | 0.14 | 0.14 | 22757  | 22757  | 22757  |
| COL | Colombia | 13505 | Cicuco                    | 0.14 | 0.14 | 0.14 | 3538   | 3538   | 3538   |
| COL | Colombia | 13506 | Cordoba                   | 0.14 | 0.14 | 0.14 | 6700   | 6700   | 6700   |
| COL | Colombia | 13507 | El Carmen De Bolivar      | 0.14 | 0.14 | 0.14 | 35689  | 35689  | 35689  |
| COL | Colombia | 13508 | El Guamo                  | 0.14 | 0.14 | 0.14 | 5069   | 5069   | 5069   |
| COL | Colombia | 13509 | Hatillo De Loba           | 0.14 | 0.14 | 0.14 | 5836   | 5836   | 5836   |
| COL | Colombia | 13510 | Magangue                  | 0.14 | 0.14 | 0.14 | 81958  | 81958  | 81958  |
| COL | Colombia | 13511 | Mahates                   | 0.14 | 0.14 | 0.14 | 19324  | 19324  | 19324  |
| COL | Colombia | 13512 | Margarita                 | 0.14 | 0.14 | 0.14 | 13366  | 13366  | 13366  |
| COL | Colombia | 13513 | Maria La Baja             | 0.14 | 0.14 | 0.14 | 26105  | 26105  | 26105  |
| COL | Colombia | 13514 | Mompos                    | 0.14 | 0.14 | 0.14 | 24750  | 24750  | 24750  |
| COL | Colombia | 13515 | Montecristo               | 0.14 | 0.14 | 0.14 | 17264  | 17264  | 17264  |
| COL | Colombia | 13516 | Morales                   | 0.14 | 0.14 | 0.14 | 45854  | 45854  | 45854  |
| COL | Colombia | 13517 | Pinillos                  | 0.14 | 0.14 | 0.14 | 67981  | 67981  | 67981  |
| COL | Colombia | 13518 | Rio Viejo                 | 0.14 | 0.14 | 0.14 | 8106   | 8106   | 8106   |
| COL | Colombia | 13519 | San Estanislao            | 0.14 | 0.14 | 0.14 | 9392   | 9392   | 9392   |
| COL | Colombia | 13520 | San Fernando              | 0.14 | 0.14 | 0.14 | 19158  | 19158  | 19158  |
| COL | Colombia | 13521 | San Jacinto               | 0.14 | 0.14 | 0.14 | 13007  | 13007  | 13007  |
| COL | Colombia | 13522 | San Juan Nepomuceno       | 0.14 | 0.14 | 0.14 | 19601  | 19601  | 19601  |
| COL | Colombia | 13523 | San Martin De Loba        | 0.14 | 0.14 | 0.14 | 8085   | 8085   | 8085   |
| COL | Colombia | 13524 | San Pablo                 | 0.14 | 0.14 | 0.14 | 13715  | 13715  | 13715  |
| COL | Colombia | 13525 | Santa Catalina            | 0.14 | 0.14 | 0.14 | 31030  | 31030  | 31030  |
| COL | Colombia | 13526 | Santa Rosa                | 0.14 | 0.14 | 0.14 | 19049  | 19049  | 19049  |
| COL | Colombia | 13527 | Santa Rosa Del Sur        | 0.14 | 0.14 | 0.14 | 30027  | 30027  | 30027  |
| COL | Colombia | 13528 | Simiti                    | 0.14 | 0.14 | 0.14 | 17001  | 17001  | 17001  |
| COL | Colombia | 13529 | Soplaviento               | 0.14 | 0.14 | 0.14 | 7349   | 7349   | 7349   |
| COL | Colombia | 13530 | Talaigua Nuevo            | 0.14 | 0.14 | 0.14 | 3831   | 3831   | 3831   |



|     |          |       |              |      |      |      |       |       |       |
|-----|----------|-------|--------------|------|------|------|-------|-------|-------|
| COL | Colombia | 13531 | Tiquisio     | 0.14 | 0.14 | 0.14 | 69596 | 69596 | 69596 |
| COL | Colombia | 13532 | Turbaco      | 0.14 | 0.14 | 0.14 | 41357 | 41357 | 41357 |
| COL | Colombia | 13533 | Turbana      | 0.14 | 0.14 | 0.14 | 16986 | 16986 | 16986 |
| COL | Colombia | 13534 | Villanueva   | 0.14 | 0.14 | 0.14 | 16076 | 16076 | 16076 |
| COL | Colombia | 13535 | Zambrano     | 0.14 | 0.14 | 0.14 | 6587  | 6587  | 6587  |
| COL | Colombia | 13536 | Almeida      | 0.14 | 0.14 | 0.14 | 738   | 738   | 738   |
| COL | Colombia | 13537 | Aquitania    | 0.14 | 0.14 | 0.14 | 11277 | 11277 | 11277 |
| COL | Colombia | 13538 | Arcabuco     | 0.14 | 0.14 | 0.14 | 6656  | 6656  | 6656  |
| COL | Colombia | 13539 | Belen        | 0.14 | 0.14 | 0.14 | 3905  | 3905  | 3905  |
| COL | Colombia | 13540 | Berbeo       | 0.14 | 0.14 | 0.14 | 1333  | 1333  | 1333  |
| COL | Colombia | 13541 | Beteitiva    | 0.14 | 0.14 | 0.14 | 2627  | 2627  | 2627  |
| COL | Colombia | 13542 | Boavita      | 0.14 | 0.14 | 0.14 | 3837  | 3837  | 3837  |
| COL | Colombia | 13543 | Boyaca       | 0.14 | 0.14 | 0.14 | 4315  | 4315  | 4315  |
| COL | Colombia | 13544 | Briceño      | 0.14 | 0.14 | 0.14 | 1509  | 1509  | 1509  |
| COL | Colombia | 13545 | Buenavista   | 0.14 | 0.14 | 0.14 | 2139  | 2139  | 2139  |
| COL | Colombia | 13546 | Busbanza     | 0.14 | 0.14 | 0.14 | 892   | 892   | 892   |
| COL | Colombia | 13547 | Caldas       | 0.14 | 0.14 | 0.14 | 2612  | 2612  | 2612  |
| COL | Colombia | 13548 | Campohermoso | 0.14 | 0.14 | 0.14 | 2669  | 2669  | 2669  |
| COL | Colombia | 13549 | Cerinza      | 0.14 | 0.14 | 0.14 | 3405  | 3405  | 3405  |
| COL | Colombia | 13550 | Chinavita    | 0.14 | 0.14 | 0.14 | 3870  | 3870  | 3870  |
| COL | Colombia | 13551 | Chiquinquirá | 0.14 | 0.14 | 0.14 | 18045 | 18045 | 18045 |
| COL | Colombia | 13552 | Chiquiza     | 0.14 | 0.14 | 0.14 | 1877  | 1877  | 1877  |
| COL | Colombia | 13553 | Chiscas      | 0.14 | 0.14 | 0.14 | 5210  | 5210  | 5210  |
| COL | Colombia | 13554 | Chita        | 0.14 | 0.14 | 0.14 | 4166  | 4166  | 4166  |
| COL | Colombia | 13555 | Chitaraque   | 0.14 | 0.14 | 0.14 | 3369  | 3369  | 3369  |
| COL | Colombia | 13556 | Chivata      | 0.14 | 0.14 | 0.14 | 4083  | 4083  | 4083  |
| COL | Colombia | 13557 | Chivor       | 0.14 | 0.14 | 0.14 | 1110  | 1110  | 1110  |
| COL | Colombia | 13558 | Cienega      | 0.14 | 0.14 | 0.14 | 2558  | 2558  | 2558  |
| COL | Colombia | 13559 | Combita      | 0.14 | 0.14 | 0.14 | 14996 | 14996 | 14996 |
| COL | Colombia | 13560 | Coper        | 0.14 | 0.14 | 0.14 | 2783  | 2783  | 2783  |
| COL | Colombia | 13561 | Corrales     | 0.14 | 0.14 | 0.14 | 7442  | 7442  | 7442  |
| COL | Colombia | 13562 | Covarachia   | 0.14 | 0.14 | 0.14 | 885   | 885   | 885   |
| COL | Colombia | 13563 | Cubara       | 0.14 | 0.14 | 0.14 | 5386  | 5386  | 5386  |

|     |          |       |                |      |      |      |       |       |       |
|-----|----------|-------|----------------|------|------|------|-------|-------|-------|
| COL | Colombia | 13564 | Cucaita        | 0.14 | 0.14 | 0.14 | 2585  | 2585  | 2585  |
| COL | Colombia | 13565 | Cuitiva        | 0.14 | 0.14 | 0.14 | 661   | 661   | 661   |
| COL | Colombia | 13566 | Duitama        | 0.14 | 0.14 | 0.14 | 56277 | 56277 | 56277 |
| COL | Colombia | 13567 | El Cocuy       | 0.14 | 0.14 | 0.14 | 1991  | 1991  | 1991  |
| COL | Colombia | 13568 | El Espino      | 0.14 | 0.14 | 0.14 | 1880  | 1880  | 1880  |
| COL | Colombia | 13569 | Firavitoba     | 0.14 | 0.14 | 0.14 | 2730  | 2730  | 2730  |
| COL | Colombia | 13570 | Floresta       | 0.14 | 0.14 | 0.14 | 8635  | 8635  | 8635  |
| COL | Colombia | 13571 | Gachantiva     | 0.14 | 0.14 | 0.14 | 2196  | 2196  | 2196  |
| COL | Colombia | 13572 | Gameza         | 0.14 | 0.14 | 0.14 | 2844  | 2844  | 2844  |
| COL | Colombia | 13573 | Garagoa        | 0.14 | 0.14 | 0.14 | 9465  | 9465  | 9465  |
| COL | Colombia | 13574 | Guacamayas     | 0.14 | 0.14 | 0.14 | 1079  | 1079  | 1079  |
| COL | Colombia | 13575 | Guateque       | 0.14 | 0.14 | 0.14 | 2504  | 2504  | 2504  |
| COL | Colombia | 13576 | Guayata        | 0.14 | 0.14 | 0.14 | 1663  | 1663  | 1663  |
| COL | Colombia | 13577 | Guican         | 0.14 | 0.14 | 0.14 | 4668  | 4668  | 4668  |
| COL | Colombia | 13578 | Iza            | 0.14 | 0.14 | 0.14 | 1326  | 1326  | 1326  |
| COL | Colombia | 13579 | Jenesano       | 0.14 | 0.14 | 0.14 | 2929  | 2929  | 2929  |
| COL | Colombia | 13580 | Jerico         | 0.14 | 0.14 | 0.14 | 1677  | 1677  | 1677  |
| COL | Colombia | 13581 | La Capilla     | 0.14 | 0.14 | 0.14 | 2437  | 2437  | 2437  |
| COL | Colombia | 13582 | La Uvita       | 0.14 | 0.14 | 0.14 | 2081  | 2081  | 2081  |
| COL | Colombia | 13583 | La Victoria    | 0.14 | 0.14 | 0.14 | 780   | 780   | 780   |
| COL | Colombia | 13584 | Labranzagrande | 0.14 | 0.14 | 0.14 | 3625  | 3625  | 3625  |
| COL | Colombia | 13585 | Macanal        | 0.14 | 0.14 | 0.14 | 2558  | 2558  | 2558  |
| COL | Colombia | 13586 | Maripi         | 0.14 | 0.14 | 0.14 | 5029  | 5029  | 5029  |
| COL | Colombia | 13587 | Miraflores     | 0.14 | 0.14 | 0.14 | 6852  | 6852  | 6852  |
| COL | Colombia | 13588 | Mongua         | 0.14 | 0.14 | 0.14 | 9160  | 9160  | 9160  |
| COL | Colombia | 13589 | Mongui         | 0.14 | 0.14 | 0.14 | 15331 | 15331 | 15331 |
| COL | Colombia | 13590 | Moniquira      | 0.14 | 0.14 | 0.14 | 13272 | 13272 | 13272 |
| COL | Colombia | 13591 | Motavita       | 0.14 | 0.14 | 0.14 | 2781  | 2781  | 2781  |
| COL | Colombia | 13592 | Muzo           | 0.14 | 0.14 | 0.14 | 4793  | 4793  | 4793  |
| COL | Colombia | 13593 | Nobsa          | 0.14 | 0.14 | 0.14 | 9864  | 9864  | 9864  |
| COL | Colombia | 13594 | Nuevo Colon    | 0.14 | 0.14 | 0.14 | 2129  | 2129  | 2129  |
| COL | Colombia | 13595 | Oicata         | 0.14 | 0.14 | 0.14 | 22596 | 22596 | 22596 |
| COL | Colombia | 13596 | Otanche        | 0.14 | 0.14 | 0.14 | 7483  | 7483  | 7483  |

|     |          |       |                       |      |      |      |       |       |       |
|-----|----------|-------|-----------------------|------|------|------|-------|-------|-------|
| COL | Colombia | 13597 | Pachavita             | 0.14 | 0.14 | 0.14 | 2171  | 2171  | 2171  |
| COL | Colombia | 13598 | Paez                  | 0.14 | 0.14 | 0.14 | 2037  | 2037  | 2037  |
| COL | Colombia | 13599 | Paipa                 | 0.14 | 0.14 | 0.14 | 14769 | 14769 | 14769 |
| COL | Colombia | 13600 | Pajarito              | 0.14 | 0.14 | 0.14 | 7956  | 7956  | 7956  |
| COL | Colombia | 13601 | Panqueba              | 0.14 | 0.14 | 0.14 | 665   | 665   | 665   |
| COL | Colombia | 13602 | Pauna                 | 0.14 | 0.14 | 0.14 | 7782  | 7782  | 7782  |
| COL | Colombia | 13603 | Paya                  | 0.14 | 0.14 | 0.14 | 4717  | 4717  | 4717  |
| COL | Colombia | 13604 | Paz De Rio            | 0.14 | 0.14 | 0.14 | 2207  | 2207  | 2207  |
| COL | Colombia | 13605 | Pesca                 | 0.14 | 0.14 | 0.14 | 5022  | 5022  | 5022  |
| COL | Colombia | 13606 | Pisva                 | 0.14 | 0.14 | 0.14 | 883   | 883   | 883   |
| COL | Colombia | 13607 | Puerto Boyaca         | 0.14 | 0.14 | 0.14 | 42376 | 42376 | 42376 |
| COL | Colombia | 13608 | Quipama               | 0.14 | 0.14 | 0.14 | 1786  | 1786  | 1786  |
| COL | Colombia | 13609 | Ramiriqui             | 0.14 | 0.14 | 0.14 | 6004  | 6004  | 6004  |
| COL | Colombia | 13610 | Raquira               | 0.14 | 0.14 | 0.14 | 7921  | 7921  | 7921  |
| COL | Colombia | 13611 | Rondon                | 0.14 | 0.14 | 0.14 | 2880  | 2880  | 2880  |
| COL | Colombia | 13612 | Saboya                | 0.14 | 0.14 | 0.14 | 21764 | 21764 | 21764 |
| COL | Colombia | 13613 | Sachica               | 0.14 | 0.14 | 0.14 | 2807  | 2807  | 2807  |
| COL | Colombia | 13614 | Samaca                | 0.14 | 0.14 | 0.14 | 11446 | 11446 | 11446 |
| COL | Colombia | 13615 | San Eduardo           | 0.14 | 0.14 | 0.14 | 1328  | 1328  | 1328  |
| COL | Colombia | 13616 | San Jose De Pare      | 0.14 | 0.14 | 0.14 | 10411 | 10411 | 10411 |
| COL | Colombia | 13617 | San Luis De Gaceno    | 0.14 | 0.14 | 0.14 | 1867  | 1867  | 1867  |
| COL | Colombia | 13618 | San Mateo             | 0.14 | 0.14 | 0.14 | 1961  | 1961  | 1961  |
| COL | Colombia | 13619 | San Miguel De Sema    | 0.14 | 0.14 | 0.14 | 8070  | 8070  | 8070  |
| COL | Colombia | 13620 | San Pablo De Borbur   | 0.14 | 0.14 | 0.14 | 5318  | 5318  | 5318  |
| COL | Colombia | 13621 | Santa Rosa De Viterbo | 0.14 | 0.14 | 0.14 | 12778 | 12778 | 12778 |
| COL | Colombia | 13622 | Santa Sofia           | 0.14 | 0.14 | 0.14 | 2141  | 2141  | 2141  |
| COL | Colombia | 13623 | Santamaria            | 0.14 | 0.14 | 0.14 | 4147  | 4147  | 4147  |
| COL | Colombia | 13624 | Santana               | 0.14 | 0.14 | 0.14 | 4208  | 4208  | 4208  |
| COL | Colombia | 13625 | Sativanorte           | 0.14 | 0.14 | 0.14 | 1447  | 1447  | 1447  |
| COL | Colombia | 13626 | Sativasur             | 0.14 | 0.14 | 0.14 | 1085  | 1085  | 1085  |
| COL | Colombia | 13627 | Siachoque             | 0.14 | 0.14 | 0.14 | 5499  | 5499  | 5499  |
| COL | Colombia | 13628 | Soata                 | 0.14 | 0.14 | 0.14 | 2379  | 2379  | 2379  |
| COL | Colombia | 13629 | Socha                 | 0.14 | 0.14 | 0.14 | 4227  | 4227  | 4227  |

|     |          |       |                |      |      |      |        |        |        |
|-----|----------|-------|----------------|------|------|------|--------|--------|--------|
| COL | Colombia | 13630 | Socota         | 0.14 | 0.14 | 0.14 | 5885   | 5885   | 5885   |
| COL | Colombia | 13631 | Sogamoso       | 0.14 | 0.14 | 0.14 | 42813  | 42813  | 42813  |
| COL | Colombia | 13632 | Somondoco      | 0.14 | 0.14 | 0.14 | 2048   | 2048   | 2048   |
| COL | Colombia | 13633 | Sora           | 0.14 | 0.14 | 0.14 | 1064   | 1064   | 1064   |
| COL | Colombia | 13634 | Soraca         | 0.14 | 0.14 | 0.14 | 4870   | 4870   | 4870   |
| COL | Colombia | 13635 | Sotaquira      | 0.14 | 0.14 | 0.14 | 7161   | 7161   | 7161   |
| COL | Colombia | 13636 | Susacon        | 0.14 | 0.14 | 0.14 | 1802   | 1802   | 1802   |
| COL | Colombia | 13637 | Sutamarchan    | 0.14 | 0.14 | 0.14 | 4719   | 4719   | 4719   |
| COL | Colombia | 13638 | Sutatenza      | 0.14 | 0.14 | 0.14 | 3013   | 3013   | 3013   |
| COL | Colombia | 13639 | Tasco          | 0.14 | 0.14 | 0.14 | 4300   | 4300   | 4300   |
| COL | Colombia | 13640 | Tenza          | 0.14 | 0.14 | 0.14 | 3255   | 3255   | 3255   |
| COL | Colombia | 13641 | Tibabosa       | 0.14 | 0.14 | 0.14 | 8725   | 8725   | 8725   |
| COL | Colombia | 13642 | Tibana         | 0.14 | 0.14 | 0.14 | 5383   | 5383   | 5383   |
| COL | Colombia | 13643 | Tinjaca        | 0.14 | 0.14 | 0.14 | 5063   | 5063   | 5063   |
| COL | Colombia | 13644 | Tipacoque      | 0.14 | 0.14 | 0.14 | 1432   | 1432   | 1432   |
| COL | Colombia | 13645 | Toca           | 0.14 | 0.14 | 0.14 | 6488   | 6488   | 6488   |
| COL | Colombia | 13646 | Togui          | 0.14 | 0.14 | 0.14 | 3536   | 3536   | 3536   |
| COL | Colombia | 13647 | Topaga         | 0.14 | 0.14 | 0.14 | 3653   | 3653   | 3653   |
| COL | Colombia | 13648 | Tota           | 0.14 | 0.14 | 0.14 | 3136   | 3136   | 3136   |
| COL | Colombia | 13649 | Tunja          | 0.14 | 0.14 | 0.14 | 100394 | 100394 | 100394 |
| COL | Colombia | 13650 | Tunungua       | 0.14 | 0.14 | 0.14 | 814    | 814    | 814    |
| COL | Colombia | 13651 | Turmeque       | 0.14 | 0.14 | 0.14 | 4292   | 4292   | 4292   |
| COL | Colombia | 13652 | Tuta           | 0.14 | 0.14 | 0.14 | 5688   | 5688   | 5688   |
| COL | Colombia | 13653 | Tutasa         | 0.14 | 0.14 | 0.14 | 2491   | 2491   | 2491   |
| COL | Colombia | 13654 | Umbita         | 0.14 | 0.14 | 0.14 | 6642   | 6642   | 6642   |
| COL | Colombia | 13655 | Ventaquemada   | 0.14 | 0.14 | 0.14 | 11030  | 11030  | 11030  |
| COL | Colombia | 13656 | Villa De Leyva | 0.14 | 0.14 | 0.14 | 7271   | 7271   | 7271   |
| COL | Colombia | 13657 | Viracacha      | 0.14 | 0.14 | 0.14 | 2864   | 2864   | 2864   |
| COL | Colombia | 13658 | Zetaquira      | 0.14 | 0.14 | 0.14 | 4230   | 4230   | 4230   |
| COL | Colombia | 13659 | Isla           | 0.09 | 0.09 | 0.09 | 0      | 0      | 0      |
| COL | Colombia | 13660 | Aguadas        | 0.14 | 0.14 | 0.14 | 13102  | 13102  | 13102  |
| COL | Colombia | 13661 | Anserma        | 0.14 | 0.14 | 0.14 | 17265  | 17265  | 17265  |
| COL | Colombia | 13662 | Aranzazu       | 0.14 | 0.14 | 0.14 | 5828   | 5828   | 5828   |

|     |          |       |                        |      |      |      |        |        |        |
|-----|----------|-------|------------------------|------|------|------|--------|--------|--------|
| COL | Colombia | 13663 | Belalcazar             | 0.14 | 0.14 | 0.14 | 10580  | 10580  | 10580  |
| COL | Colombia | 13664 | Chinchina              | 0.14 | 0.14 | 0.14 | 18988  | 18988  | 18988  |
| COL | Colombia | 13665 | Filadelfia             | 0.14 | 0.14 | 0.14 | 11774  | 11774  | 11774  |
| COL | Colombia | 13666 | La Dorada              | 0.14 | 0.14 | 0.14 | 37508  | 37508  | 37508  |
| COL | Colombia | 13667 | La Merced              | 0.14 | 0.14 | 0.14 | 5520   | 5520   | 5520   |
| COL | Colombia | 13668 | Manizales              | 0.14 | 0.14 | 0.14 | 196275 | 196275 | 196275 |
| COL | Colombia | 13669 | Manzanares             | 0.14 | 0.14 | 0.14 | 8658   | 8658   | 8658   |
| COL | Colombia | 13670 | Marmato                | 0.14 | 0.14 | 0.14 | 5632   | 5632   | 5632   |
| COL | Colombia | 13671 | Marquetalia            | 0.14 | 0.14 | 0.14 | 7200   | 7200   | 7200   |
| COL | Colombia | 13672 | Marulanda              | 0.14 | 0.14 | 0.14 | 7064   | 7064   | 7064   |
| COL | Colombia | 13673 | Neira                  | 0.14 | 0.14 | 0.14 | 62452  | 62452  | 62452  |
| COL | Colombia | 13674 | Pacora                 | 0.14 | 0.14 | 0.14 | 13079  | 13079  | 13079  |
| COL | Colombia | 13675 | Palestina              | 0.14 | 0.14 | 0.14 | 12367  | 12367  | 12367  |
| COL | Colombia | 13676 | Pensilvania            | 0.14 | 0.14 | 0.14 | 17067  | 17067  | 17067  |
| COL | Colombia | 13677 | Riosucio               | 0.14 | 0.14 | 0.14 | 31810  | 31810  | 31810  |
| COL | Colombia | 13678 | Risaralda              | 0.14 | 0.14 | 0.14 | 14808  | 14808  | 14808  |
| COL | Colombia | 13679 | Salamina               | 0.14 | 0.14 | 0.14 | 11022  | 11022  | 11022  |
| COL | Colombia | 13680 | Samana                 | 0.14 | 0.14 | 0.14 | 23420  | 23420  | 23420  |
| COL | Colombia | 13681 | Supia                  | 0.14 | 0.14 | 0.14 | 13024  | 13024  | 13024  |
| COL | Colombia | 13682 | Victoria               | 0.14 | 0.14 | 0.14 | 9555   | 9555   | 9555   |
| COL | Colombia | 13683 | Villamaria             | 0.14 | 0.14 | 0.14 | 49102  | 49102  | 49102  |
| COL | Colombia | 13684 | Viterbo                | 0.14 | 0.14 | 0.14 | 6468   | 6468   | 6468   |
| COL | Colombia | 13685 | Albania                | 0.14 | 0.14 | 0.14 | 2514   | 2514   | 2514   |
| COL | Colombia | 13686 | Belen De Los Andaquies | 0.14 | 0.14 | 0.14 | 6449   | 6449   | 6449   |
| COL | Colombia | 13687 | Cartagena Del Chaira   | 0.14 | 0.14 | 0.14 | 22444  | 22444  | 22444  |
| COL | Colombia | 13688 | Curillo                | 0.14 | 0.14 | 0.14 | 5056   | 5056   | 5056   |
| COL | Colombia | 13689 | El Doncello            | 0.14 | 0.14 | 0.14 | 30953  | 30953  | 30953  |
| COL | Colombia | 13690 | El Paujil              | 0.14 | 0.14 | 0.14 | 14391  | 14391  | 14391  |
| COL | Colombia | 13691 | Florencia              | 0.14 | 0.14 | 0.14 | 81368  | 81368  | 81368  |
| COL | Colombia | 13692 | La Montanita           | 0.14 | 0.14 | 0.14 | 18054  | 18054  | 18054  |
| COL | Colombia | 13693 | Milan                  | 0.14 | 0.14 | 0.14 | 8531   | 8531   | 8531   |
| COL | Colombia | 13694 | Morelia                | 0.14 | 0.14 | 0.14 | 1581   | 1581   | 1581   |
| COL | Colombia | 13695 | Puerto Rico            | 0.14 | 0.14 | 0.14 | 21044  | 21044  | 21044  |

|     |          |       |                        |      |      |      |       |       |       |
|-----|----------|-------|------------------------|------|------|------|-------|-------|-------|
| COL | Colombia | 13696 | San Jose De Fragua     | 0.14 | 0.14 | 0.14 | 5990  | 5990  | 5990  |
| COL | Colombia | 13697 | San Vicente Del Caguan | 0.14 | 0.14 | 0.14 | 61424 | 61424 | 61424 |
| COL | Colombia | 13698 | Solano                 | 0.14 | 0.14 | 0.14 | 41889 | 41889 | 41889 |
| COL | Colombia | 13699 | Valparaiso             | 0.14 | 0.14 | 0.14 | 10826 | 10826 | 10826 |
| COL | Colombia | 13700 | Aguazul                | 0.50 | 0.50 | 0.50 | 13070 | 13070 | 13070 |
| COL | Colombia | 13701 | Chameza                | 0.50 | 0.50 | 0.50 | 1467  | 1467  | 1467  |
| COL | Colombia | 13702 | Hato Corozal           | 0.50 | 0.50 | 0.50 | 4197  | 4197  | 4197  |
| COL | Colombia | 13703 | La Salina              | 0.50 | 0.50 | 0.50 | 396   | 396   | 396   |
| COL | Colombia | 13704 | Mani                   | 0.50 | 0.50 | 0.50 | 5128  | 5128  | 5128  |
| COL | Colombia | 13705 | Monterrey              | 0.50 | 0.50 | 0.50 | 4685  | 4685  | 4685  |
| COL | Colombia | 13706 | Nunchia                | 0.50 | 0.50 | 0.50 | 4315  | 4315  | 4315  |
| COL | Colombia | 13707 | Orocue                 | 0.50 | 0.50 | 0.50 | 3500  | 3500  | 3500  |
| COL | Colombia | 13708 | Paz De Ariporo         | 0.50 | 0.50 | 0.50 | 11221 | 11221 | 11221 |
| COL | Colombia | 13709 | Pore                   | 0.50 | 0.50 | 0.50 | 2358  | 2358  | 2358  |
| COL | Colombia | 13710 | Recetor                | 0.50 | 0.50 | 0.50 | 6389  | 6389  | 6389  |
| COL | Colombia | 13711 | Sabanalarga            | 0.50 | 0.50 | 0.50 | 1610  | 1610  | 1610  |
| COL | Colombia | 13712 | Sacama                 | 0.50 | 0.50 | 0.50 | 400   | 400   | 400   |
| COL | Colombia | 13713 | San Luis De Palenque   | 0.50 | 0.50 | 0.50 | 12470 | 12470 | 12470 |
| COL | Colombia | 13714 | Tamara                 | 0.50 | 0.50 | 0.50 | 2331  | 2331  | 2331  |
| COL | Colombia | 13715 | Tauramena              | 0.50 | 0.50 | 0.50 | 11584 | 11584 | 11584 |
| COL | Colombia | 13716 | Trinidad               | 0.50 | 0.50 | 0.50 | 6409  | 6409  | 6409  |
| COL | Colombia | 13717 | Villanueva             | 0.50 | 0.50 | 0.50 | 5921  | 5921  | 5921  |
| COL | Colombia | 13718 | Yopal                  | 0.50 | 0.50 | 0.50 | 55111 | 55111 | 55111 |
| COL | Colombia | 13719 | Almaguer               | 0.14 | 0.14 | 0.14 | 13550 | 13550 | 13550 |
| COL | Colombia | 13720 | Argelia                | 0.14 | 0.14 | 0.14 | 8633  | 8633  | 8633  |
| COL | Colombia | 13721 | Balboa                 | 0.14 | 0.14 | 0.14 | 15424 | 15424 | 15424 |
| COL | Colombia | 13722 | Bolivar                | 0.14 | 0.14 | 0.14 | 34449 | 34449 | 34449 |
| COL | Colombia | 13723 | Buenos Aires           | 0.14 | 0.14 | 0.14 | 26723 | 26723 | 26723 |
| COL | Colombia | 13724 | Cajibio                | 0.14 | 0.14 | 0.14 | 33225 | 33225 | 33225 |
| COL | Colombia | 13725 | Caldono                | 0.14 | 0.14 | 0.14 | 38303 | 38303 | 38303 |
| COL | Colombia | 13726 | Caloto                 | 0.14 | 0.14 | 0.14 | 34202 | 34202 | 34202 |
| COL | Colombia | 13727 | Corinto                | 0.14 | 0.14 | 0.14 | 21295 | 21295 | 21295 |
| COL | Colombia | 13728 | El Tambo               | 0.14 | 0.14 | 0.14 | 34593 | 34593 | 34593 |

|     |          |       |                        |      |      |      |        |        |        |
|-----|----------|-------|------------------------|------|------|------|--------|--------|--------|
| COL | Colombia | 13729 | Florencia              | 0.14 | 0.14 | 0.14 | 1349   | 1349   | 1349   |
| COL | Colombia | 13730 | Gorgona (is.)          | 0.14 | 0.14 | 0.14 | 118    | 118    | 118    |
| COL | Colombia | 13731 | Guapi                  | 0.14 | 0.14 | 0.14 | 18898  | 18898  | 18898  |
| COL | Colombia | 13732 | Guapi (is.)            | 0.14 | 0.14 | 0.14 | 17     | 17     | 17     |
| COL | Colombia | 13733 | Inza                   | 0.14 | 0.14 | 0.14 | 62487  | 62487  | 62487  |
| COL | Colombia | 13734 | Jambalo                | 0.14 | 0.14 | 0.14 | 16378  | 16378  | 16378  |
| COL | Colombia | 13735 | La Sierra              | 0.14 | 0.14 | 0.14 | 10139  | 10139  | 10139  |
| COL | Colombia | 13736 | La Vega                | 0.14 | 0.14 | 0.14 | 30808  | 30808  | 30808  |
| COL | Colombia | 13737 | Lopez De Micay         | 0.14 | 0.14 | 0.14 | 11688  | 11688  | 11688  |
| COL | Colombia | 13738 | Mercaderes             | 0.14 | 0.14 | 0.14 | 12843  | 12843  | 12843  |
| COL | Colombia | 13739 | Miranda                | 0.14 | 0.14 | 0.14 | 23643  | 23643  | 23643  |
| COL | Colombia | 13740 | Morales                | 0.14 | 0.14 | 0.14 | 12620  | 12620  | 12620  |
| COL | Colombia | 13741 | Padilla                | 0.14 | 0.14 | 0.14 | 12494  | 12494  | 12494  |
| COL | Colombia | 13742 | Paez                   | 0.14 | 0.14 | 0.14 | 21057  | 21057  | 21057  |
| COL | Colombia | 13743 | Patia (el Bordo)       | 0.14 | 0.14 | 0.14 | 23536  | 23536  | 23536  |
| COL | Colombia | 13744 | Piendamó               | 0.14 | 0.14 | 0.14 | 13327  | 13327  | 13327  |
| COL | Colombia | 13745 | Popayan                | 0.14 | 0.14 | 0.14 | 148036 | 148036 | 148036 |
| COL | Colombia | 13746 | Puerto Tejada          | 0.14 | 0.14 | 0.14 | 51454  | 51454  | 51454  |
| COL | Colombia | 13747 | Purace                 | 0.14 | 0.14 | 0.14 | 27736  | 27736  | 27736  |
| COL | Colombia | 13748 | Rosas                  | 0.14 | 0.14 | 0.14 | 6082   | 6082   | 6082   |
| COL | Colombia | 13749 | San Sebastian          | 0.14 | 0.14 | 0.14 | 17486  | 17486  | 17486  |
| COL | Colombia | 13750 | Santa Rosa             | 0.14 | 0.14 | 0.14 | 19497  | 19497  | 19497  |
| COL | Colombia | 13751 | Santander De Quilichao | 0.14 | 0.14 | 0.14 | 63201  | 63201  | 63201  |
| COL | Colombia | 13752 | Silvia                 | 0.14 | 0.14 | 0.14 | 24368  | 24368  | 24368  |
| COL | Colombia | 13753 | Sotara                 | 0.14 | 0.14 | 0.14 | 19876  | 19876  | 19876  |
| COL | Colombia | 13754 | Suarez                 | 0.14 | 0.14 | 0.14 | 5413   | 5413   | 5413   |
| COL | Colombia | 13755 | Timbio                 | 0.14 | 0.14 | 0.14 | 15433  | 15433  | 15433  |
| COL | Colombia | 13756 | Timbiqui               | 0.14 | 0.14 | 0.14 | 10296  | 10296  | 10296  |
| COL | Colombia | 13757 | Timbiqui (is.)         | 0.14 | 0.14 | 0.14 | 21     | 21     | 21     |
| COL | Colombia | 13758 | Toribio                | 0.14 | 0.14 | 0.14 | 19193  | 19193  | 19193  |
| COL | Colombia | 13759 | Aguachica              | 0.53 | 0.72 | 0.90 | 21872  | 6403   | 0      |
| COL | Colombia | 13760 | Agustin Codazzi        | 0.53 | 0.72 | 0.90 | 11527  | 3374   | 0      |
| COL | Colombia | 13761 | Astrea                 | 0.53 | 0.72 | 0.90 | 4382   | 1283   | 0      |

|     |          |       |                           |      |      |      |        |       |       |
|-----|----------|-------|---------------------------|------|------|------|--------|-------|-------|
| COL | Colombia | 13762 | Becerril                  | 0.53 | 0.72 | 0.90 | 5200   | 1522  | 0     |
| COL | Colombia | 13763 | Bosconia                  | 0.53 | 0.72 | 0.90 | 8882   | 2600  | 0     |
| COL | Colombia | 13764 | Chimichagua               | 0.53 | 0.72 | 0.90 | 8806   | 2578  | 0     |
| COL | Colombia | 13765 | Chiriguana                | 0.53 | 0.72 | 0.90 | 5805   | 1699  | 0     |
| COL | Colombia | 13766 | Curumani                  | 0.53 | 0.72 | 0.90 | 5462   | 1599  | 0     |
| COL | Colombia | 13767 | El Copey                  | 0.53 | 0.72 | 0.90 | 6909   | 2023  | 0     |
| COL | Colombia | 13768 | El Paso                   | 0.53 | 0.72 | 0.90 | 5863   | 1716  | 0     |
| COL | Colombia | 13769 | Gamarra                   | 0.53 | 0.72 | 0.90 | 4931   | 1444  | 0     |
| COL | Colombia | 13770 | Gonzalez                  | 0.53 | 0.72 | 0.90 | 1703   | 498   | 0     |
| COL | Colombia | 13771 | La Gloria                 | 0.53 | 0.72 | 0.90 | 3627   | 1062  | 0     |
| COL | Colombia | 13772 | La Jagua De Iribico       | 0.53 | 0.72 | 0.90 | 4960   | 1452  | 0     |
| COL | Colombia | 13773 | La Paz                    | 0.53 | 0.72 | 0.90 | 8544   | 2501  | 0     |
| COL | Colombia | 13774 | Manaure Balcon Del Cesar  | 0.53 | 0.72 | 0.90 | 2869   | 840   | 0     |
| COL | Colombia | 13775 | Pailitas                  | 0.53 | 0.72 | 0.90 | 3641   | 1066  | 0     |
| COL | Colombia | 13776 | Pelaya                    | 0.53 | 0.72 | 0.90 | 4187   | 1226  | 0     |
| COL | Colombia | 13777 | Rio De Oro                | 0.53 | 0.72 | 0.90 | 2528   | 740   | 0     |
| COL | Colombia | 13778 | San Alberto               | 0.53 | 0.72 | 0.90 | 7476   | 2189  | 0     |
| COL | Colombia | 13779 | San Diego                 | 0.53 | 0.72 | 0.90 | 1538   | 450   | 0     |
| COL | Colombia | 13780 | San Martin                | 0.53 | 0.72 | 0.90 | 4584   | 1342  | 0     |
| COL | Colombia | 13781 | Tamalameque               | 0.53 | 0.72 | 0.90 | 5197   | 1521  | 0     |
| COL | Colombia | 13782 | Valledupar                | 0.53 | 0.72 | 0.90 | 117187 | 34304 | 0     |
| COL | Colombia | 13783 | Acandí                    | 0.14 | 0.14 | 0.14 | 6572   | 6572  | 6572  |
| COL | Colombia | 13784 | Alto Baudo (pie De Pato)  | 0.14 | 0.14 | 0.14 | 21992  | 21992 | 21992 |
| COL | Colombia | 13785 | Bagado                    | 0.14 | 0.14 | 0.14 | 11261  | 11261 | 11261 |
| COL | Colombia | 13786 | Bahia Solano (ciudad Muti | 0.14 | 0.14 | 0.14 | 6035   | 6035  | 6035  |
| COL | Colombia | 13787 | Bahia Solano (is.)        | 0.14 | 0.14 | 0.14 | 0      | 0     | 0     |
| COL | Colombia | 13789 | Bajo Baudo (pizarro)      | 0.14 | 0.14 | 0.14 | 20071  | 20071 | 20071 |
| COL | Colombia | 13790 | Bojaya (bella Vista)      | 0.14 | 0.14 | 0.14 | 5695   | 5695  | 5695  |
| COL | Colombia | 13791 | Canton De San Pablo       | 0.14 | 0.14 | 0.14 | 7762   | 7762  | 7762  |
| COL | Colombia | 13792 | Condoto                   | 0.14 | 0.14 | 0.14 | 14540  | 14540 | 14540 |
| COL | Colombia | 13793 | El Carmen                 | 0.14 | 0.14 | 0.14 | 15922  | 15922 | 15922 |
| COL | Colombia | 13794 | Istmina                   | 0.14 | 0.14 | 0.14 | 11691  | 11691 | 11691 |
| COL | Colombia | 13795 | Jurado                    | 0.14 | 0.14 | 0.14 | 2075   | 2075  | 2075  |



|     |          |       |                           |      |      |      |        |        |        |
|-----|----------|-------|---------------------------|------|------|------|--------|--------|--------|
| COL | Colombia | 13796 | Jurado (is.)              | 0.14 | 0.14 | 0.14 | 1      | 1      | 1      |
| COL | Colombia | 13797 | Litoral Del San Juan      | 0.14 | 0.14 | 0.14 | 24953  | 24953  | 24953  |
| COL | Colombia | 13798 | Litoral Del San Juan (is. | 0.14 | 0.14 | 0.14 | 4      | 4      | 4      |
| COL | Colombia | 13799 | Lloro                     | 0.14 | 0.14 | 0.14 | 8691   | 8691   | 8691   |
| COL | Colombia | 13800 | Novita                    | 0.14 | 0.14 | 0.14 | 5411   | 5411   | 5411   |
| COL | Colombia | 13801 | Nuqui                     | 0.14 | 0.14 | 0.14 | 6248   | 6248   | 6248   |
| COL | Colombia | 13802 | Quibdo                    | 0.14 | 0.14 | 0.14 | 107023 | 107023 | 107023 |
| COL | Colombia | 13803 | Riosucio                  | 0.14 | 0.14 | 0.14 | 21867  | 21867  | 21867  |
| COL | Colombia | 13804 | San Jose Del Palmar       | 0.14 | 0.14 | 0.14 | 819    | 819    | 819    |
| COL | Colombia | 13805 | Sipi                      | 0.14 | 0.14 | 0.14 | 3669   | 3669   | 3669   |
| COL | Colombia | 13806 | Tado                      | 0.14 | 0.14 | 0.14 | 13653  | 13653  | 13653  |
| COL | Colombia | 13807 | Unguia                    | 0.14 | 0.14 | 0.14 | 8973   | 8973   | 8973   |
| COL | Colombia | 13808 | Ayapel                    | 0.14 | 0.14 | 0.14 | 43565  | 43565  | 43565  |
| COL | Colombia | 13809 | Buenavista                | 0.14 | 0.14 | 0.14 | 16382  | 16382  | 16382  |
| COL | Colombia | 13810 | Canalete                  | 0.14 | 0.14 | 0.14 | 19536  | 19536  | 19536  |
| COL | Colombia | 13811 | Cerete                    | 0.14 | 0.14 | 0.14 | 48702  | 48702  | 48702  |
| COL | Colombia | 13812 | Chima                     | 0.14 | 0.14 | 0.14 | 14122  | 14122  | 14122  |
| COL | Colombia | 13813 | Chinu                     | 0.14 | 0.14 | 0.14 | 36819  | 36819  | 36819  |
| COL | Colombia | 13814 | Cienaga De Oro            | 0.14 | 0.14 | 0.14 | 42496  | 42496  | 42496  |
| COL | Colombia | 13815 | Lorica                    | 0.14 | 0.14 | 0.14 | 83169  | 83169  | 83169  |
| COL | Colombia | 13816 | Los Cordobas              | 0.14 | 0.14 | 0.14 | 12788  | 12788  | 12788  |
| COL | Colombia | 13817 | Momil                     | 0.14 | 0.14 | 0.14 | 8459   | 8459   | 8459   |
| COL | Colombia | 13819 | Montelibano               | 0.14 | 0.14 | 0.14 | 67675  | 67675  | 67675  |
| COL | Colombia | 13820 | Monteria                  | 0.14 | 0.14 | 0.14 | 276818 | 276818 | 276818 |
| COL | Colombia | 13821 | MoYitos                   | 0.14 | 0.14 | 0.14 | 22262  | 22262  | 22262  |
| COL | Colombia | 13822 | Planeta Rica              | 0.14 | 0.14 | 0.14 | 36435  | 36435  | 36435  |
| COL | Colombia | 13823 | Pueblo Nuevo              | 0.14 | 0.14 | 0.14 | 27867  | 27867  | 27867  |
| COL | Colombia | 13824 | Puerto Escondido          | 0.14 | 0.14 | 0.14 | 24028  | 24028  | 24028  |
| COL | Colombia | 13825 | Puerto Libertador         | 0.14 | 0.14 | 0.14 | 32534  | 32534  | 32534  |
| COL | Colombia | 13826 | Purisima                  | 0.14 | 0.14 | 0.14 | 8069   | 8069   | 8069   |
| COL | Colombia | 13827 | Sahagun                   | 0.14 | 0.14 | 0.14 | 127932 | 127932 | 127932 |
| COL | Colombia | 13828 | San Andres De Sotavento   | 0.14 | 0.14 | 0.14 | 41010  | 41010  | 41010  |
| COL | Colombia | 13829 | San Antero                | 0.14 | 0.14 | 0.14 | 9150   | 9150   | 9150   |

|     |          |       |                        |      |      |      |        |        |        |
|-----|----------|-------|------------------------|------|------|------|--------|--------|--------|
| COL | Colombia | 13830 | San Bernardo El Viento | 0.14 | 0.14 | 0.14 | 28248  | 28248  | 28248  |
| COL | Colombia | 13832 | San Carlos             | 0.14 | 0.14 | 0.14 | 18406  | 18406  | 18406  |
| COL | Colombia | 13833 | San Pelayo             | 0.14 | 0.14 | 0.14 | 36771  | 36771  | 36771  |
| COL | Colombia | 13834 | Tierralta              | 0.14 | 0.14 | 0.14 | 82362  | 82362  | 82362  |
| COL | Colombia | 13835 | Valencia               | 0.14 | 0.14 | 0.14 | 29114  | 29114  | 29114  |
| COL | Colombia | 13836 | Agua De Dios           | 0.14 | 0.14 | 0.14 | 5725   | 5725   | 5725   |
| COL | Colombia | 13837 | Alban                  | 0.14 | 0.14 | 0.14 | 3223   | 3223   | 3223   |
| COL | Colombia | 13838 | Anapoima               | 0.14 | 0.14 | 0.14 | 6991   | 6991   | 6991   |
| COL | Colombia | 13839 | Anolaima               | 0.14 | 0.14 | 0.14 | 7162   | 7162   | 7162   |
| COL | Colombia | 13840 | Apulo (rafael Reyes)   | 0.14 | 0.14 | 0.14 | 4634   | 4634   | 4634   |
| COL | Colombia | 13841 | Arbelaez               | 0.14 | 0.14 | 0.14 | 6352   | 6352   | 6352   |
| COL | Colombia | 13842 | Beltran                | 0.14 | 0.14 | 0.14 | 3216   | 3216   | 3216   |
| COL | Colombia | 13843 | Bituima                | 0.14 | 0.14 | 0.14 | 1437   | 1437   | 1437   |
| COL | Colombia | 13844 | Bojaca                 | 0.14 | 0.14 | 0.14 | 7474   | 7474   | 7474   |
| COL | Colombia | 13845 | Cabrera                | 0.14 | 0.14 | 0.14 | 2947   | 2947   | 2947   |
| COL | Colombia | 13846 | Cachipay               | 0.14 | 0.14 | 0.14 | 5979   | 5979   | 5979   |
| COL | Colombia | 13847 | Cajica                 | 0.14 | 0.14 | 0.14 | 41687  | 41687  | 41687  |
| COL | Colombia | 13848 | Caparrapi              | 0.14 | 0.14 | 0.14 | 10350  | 10350  | 10350  |
| COL | Colombia | 13849 | Caqueza                | 0.14 | 0.14 | 0.14 | 8136   | 8136   | 8136   |
| COL | Colombia | 13850 | Carmen De Carupa       | 0.14 | 0.14 | 0.14 | 5355   | 5355   | 5355   |
| COL | Colombia | 13851 | Chaguani               | 0.14 | 0.14 | 0.14 | 2288   | 2288   | 2288   |
| COL | Colombia | 13852 | Chia                   | 0.14 | 0.14 | 0.14 | 116972 | 116972 | 116972 |
| COL | Colombia | 13853 | Chipaque               | 0.14 | 0.14 | 0.14 | 93961  | 93961  | 93961  |
| COL | Colombia | 13854 | Choachi                | 0.14 | 0.14 | 0.14 | 56015  | 56015  | 56015  |
| COL | Colombia | 13855 | Choconta               | 0.14 | 0.14 | 0.14 | 21005  | 21005  | 21005  |
| COL | Colombia | 13856 | Cogua                  | 0.14 | 0.14 | 0.14 | 28418  | 28418  | 28418  |
| COL | Colombia | 13857 | Cota                   | 0.14 | 0.14 | 0.14 | 23485  | 23485  | 23485  |
| COL | Colombia | 13858 | Cucunuba               | 0.14 | 0.14 | 0.14 | 3519   | 3519   | 3519   |
| COL | Colombia | 13859 | El Colegio             | 0.14 | 0.14 | 0.14 | 12172  | 12172  | 12172  |
| COL | Colombia | 13860 | El Peñon               | 0.14 | 0.14 | 0.14 | 2892   | 2892   | 2892   |
| COL | Colombia | 13861 | Facatativa             | 0.14 | 0.14 | 0.14 | 68959  | 68959  | 68959  |
| COL | Colombia | 13862 | Fomeque                | 0.14 | 0.14 | 0.14 | 8494   | 8494   | 8494   |
| COL | Colombia | 13863 | Fosca                  | 0.14 | 0.14 | 0.14 | 3346   | 3346   | 3346   |

|     |          |       |                     |      |      |      |        |        |        |
|-----|----------|-------|---------------------|------|------|------|--------|--------|--------|
| COL | Colombia | 13864 | Funza               | 0.14 | 0.14 | 0.14 | 52355  | 52355  | 52355  |
| COL | Colombia | 13865 | Fuquene             | 0.14 | 0.14 | 0.14 | 6673   | 6673   | 6673   |
| COL | Colombia | 13866 | Fusagasuga          | 0.14 | 0.14 | 0.14 | 79368  | 79368  | 79368  |
| COL | Colombia | 13867 | Gachala             | 0.14 | 0.14 | 0.14 | 3677   | 3677   | 3677   |
| COL | Colombia | 13868 | Gachancipa          | 0.14 | 0.14 | 0.14 | 14385  | 14385  | 14385  |
| COL | Colombia | 13869 | Gacheta             | 0.14 | 0.14 | 0.14 | 8103   | 8103   | 8103   |
| COL | Colombia | 13870 | Gama                | 0.14 | 0.14 | 0.14 | 1893   | 1893   | 1893   |
| COL | Colombia | 13871 | Girardot            | 0.14 | 0.14 | 0.14 | 43115  | 43115  | 43115  |
| COL | Colombia | 13872 | Guacheta            | 0.14 | 0.14 | 0.14 | 9168   | 9168   | 9168   |
| COL | Colombia | 13873 | Guaduas             | 0.14 | 0.14 | 0.14 | 27371  | 27371  | 27371  |
| COL | Colombia | 13874 | Guasca              | 0.14 | 0.14 | 0.14 | 11644  | 11644  | 11644  |
| COL | Colombia | 13875 | Guataqui            | 0.14 | 0.14 | 0.14 | 1742   | 1742   | 1742   |
| COL | Colombia | 13876 | Guatavita           | 0.14 | 0.14 | 0.14 | 3477   | 3477   | 3477   |
| COL | Colombia | 13877 | Guayabal De Siquima | 0.14 | 0.14 | 0.14 | 1906   | 1906   | 1906   |
| COL | Colombia | 13878 | Guayabetal          | 0.14 | 0.14 | 0.14 | 4060   | 4060   | 4060   |
| COL | Colombia | 13879 | Gutierrez           | 0.14 | 0.14 | 0.14 | 490374 | 490374 | 490374 |
| COL | Colombia | 13880 | Jerusalen           | 0.14 | 0.14 | 0.14 | 1932   | 1932   | 1932   |
| COL | Colombia | 13881 | Junin               | 0.14 | 0.14 | 0.14 | 4697   | 4697   | 4697   |
| COL | Colombia | 13882 | La Calera           | 0.14 | 0.14 | 0.14 | 120277 | 120277 | 120277 |
| COL | Colombia | 13883 | La Mesa             | 0.14 | 0.14 | 0.14 | 18875  | 18875  | 18875  |
| COL | Colombia | 13884 | La Palma            | 0.14 | 0.14 | 0.14 | 4703   | 4703   | 4703   |
| COL | Colombia | 13885 | La Peña             | 0.14 | 0.14 | 0.14 | 4819   | 4819   | 4819   |
| COL | Colombia | 13886 | La Vega             | 0.14 | 0.14 | 0.14 | 13032  | 13032  | 13032  |
| COL | Colombia | 13887 | Lenguazaque         | 0.14 | 0.14 | 0.14 | 7622   | 7622   | 7622   |
| COL | Colombia | 13888 | Macheta             | 0.14 | 0.14 | 0.14 | 6637   | 6637   | 6637   |
| COL | Colombia | 13889 | Madrid              | 0.14 | 0.14 | 0.14 | 48452  | 48452  | 48452  |
| COL | Colombia | 13890 | Manta               | 0.14 | 0.14 | 0.14 | 2048   | 2048   | 2048   |
| COL | Colombia | 13891 | Medina              | 0.14 | 0.14 | 0.14 | 10253  | 10253  | 10253  |
| COL | Colombia | 13892 | Mosquera            | 0.14 | 0.14 | 0.14 | 78884  | 78884  | 78884  |
| COL | Colombia | 13893 | Nariño              | 0.14 | 0.14 | 0.14 | 8641   | 8641   | 8641   |
| COL | Colombia | 13894 | Nemocon             | 0.14 | 0.14 | 0.14 | 15515  | 15515  | 15515  |
| COL | Colombia | 13895 | Nilo                | 0.14 | 0.14 | 0.14 | 19842  | 19842  | 19842  |
| COL | Colombia | 13896 | Nimaima             | 0.14 | 0.14 | 0.14 | 4766   | 4766   | 4766   |

|     |          |       |                           |      |      |      |         |         |         |
|-----|----------|-------|---------------------------|------|------|------|---------|---------|---------|
| COL | Colombia | 13897 | Nocaima                   | 0.14 | 0.14 | 0.14 | 4006    | 4006    | 4006    |
| COL | Colombia | 13898 | Pacho                     | 0.14 | 0.14 | 0.14 | 15066   | 15066   | 15066   |
| COL | Colombia | 13899 | Paime                     | 0.14 | 0.14 | 0.14 | 2890    | 2890    | 2890    |
| COL | Colombia | 13900 | Pandi                     | 0.14 | 0.14 | 0.14 | 3684    | 3684    | 3684    |
| COL | Colombia | 13901 | Paratebueno               | 0.14 | 0.14 | 0.14 | 5773    | 5773    | 5773    |
| COL | Colombia | 13902 | Pasca                     | 0.14 | 0.14 | 0.14 | 6029    | 6029    | 6029    |
| COL | Colombia | 13903 | Puerto Salgar             | 0.14 | 0.14 | 0.14 | 19886   | 19886   | 19886   |
| COL | Colombia | 13904 | Puli                      | 0.14 | 0.14 | 0.14 | 1480    | 1480    | 1480    |
| COL | Colombia | 13905 | Quebradanegra             | 0.14 | 0.14 | 0.14 | 3441    | 3441    | 3441    |
| COL | Colombia | 13906 | Quetame                   | 0.14 | 0.14 | 0.14 | 5573    | 5573    | 5573    |
| COL | Colombia | 13907 | Quipile                   | 0.14 | 0.14 | 0.14 | 3754    | 3754    | 3754    |
| COL | Colombia | 13908 | Ricaurte                  | 0.14 | 0.14 | 0.14 | 17833   | 17833   | 17833   |
| COL | Colombia | 13909 | San Antonio Del Tequendam | 0.14 | 0.14 | 0.14 | 8811    | 8811    | 8811    |
| COL | Colombia | 13910 | San Bernardo              | 0.14 | 0.14 | 0.14 | 58420   | 58420   | 58420   |
| COL | Colombia | 13911 | San Cayetano              | 0.14 | 0.14 | 0.14 | 4022    | 4022    | 4022    |
| COL | Colombia | 13912 | San Francisco             | 0.14 | 0.14 | 0.14 | 11907   | 11907   | 11907   |
| COL | Colombia | 13913 | San Juan De Rio Seco      | 0.14 | 0.14 | 0.14 | 5116    | 5116    | 5116    |
| COL | Colombia | 13914 | Santafe De Bogota D.c.    | 0.14 | 0.14 | 0.14 | 4392570 | 4392570 | 4392570 |
| COL | Colombia | 13915 | Sasaima                   | 0.14 | 0.14 | 0.14 | 9838    | 9838    | 9838    |
| COL | Colombia | 13916 | Sesquile                  | 0.14 | 0.14 | 0.14 | 20942   | 20942   | 20942   |
| COL | Colombia | 13917 | Sibate                    | 0.14 | 0.14 | 0.14 | 22038   | 22038   | 22038   |
| COL | Colombia | 13918 | Silvania                  | 0.14 | 0.14 | 0.14 | 17416   | 17416   | 17416   |
| COL | Colombia | 13919 | Simijaca                  | 0.14 | 0.14 | 0.14 | 8406    | 8406    | 8406    |
| COL | Colombia | 13920 | Soacha                    | 0.14 | 0.14 | 0.14 | 236482  | 236482  | 236482  |
| COL | Colombia | 13921 | Sopo                      | 0.14 | 0.14 | 0.14 | 67118   | 67118   | 67118   |
| COL | Colombia | 13922 | Subachoque                | 0.14 | 0.14 | 0.14 | 33112   | 33112   | 33112   |
| COL | Colombia | 13923 | Suesca                    | 0.14 | 0.14 | 0.14 | 15518   | 15518   | 15518   |
| COL | Colombia | 13924 | Supata                    | 0.14 | 0.14 | 0.14 | 3938    | 3938    | 3938    |
| COL | Colombia | 13925 | Susa                      | 0.14 | 0.14 | 0.14 | 7939    | 7939    | 7939    |
| COL | Colombia | 13926 | Sutatausa                 | 0.14 | 0.14 | 0.14 | 2404    | 2404    | 2404    |
| COL | Colombia | 13927 | Tabio                     | 0.14 | 0.14 | 0.14 | 16070   | 16070   | 16070   |
| COL | Colombia | 13928 | Tausa                     | 0.14 | 0.14 | 0.14 | 10225   | 10225   | 10225   |
| COL | Colombia | 13929 | Tena                      | 0.14 | 0.14 | 0.14 | 9347    | 9347    | 9347    |

|     |          |       |                        |      |      |      |       |       |       |
|-----|----------|-------|------------------------|------|------|------|-------|-------|-------|
| COL | Colombia | 13930 | Tenjo                  | 0.14 | 0.14 | 0.14 | 22479 | 22479 | 22479 |
| COL | Colombia | 13931 | Tibacuy                | 0.14 | 0.14 | 0.14 | 5127  | 5127  | 5127  |
| COL | Colombia | 13932 | Tibirita               | 0.14 | 0.14 | 0.14 | 1413  | 1413  | 1413  |
| COL | Colombia | 13933 | Tocaima                | 0.14 | 0.14 | 0.14 | 19681 | 19681 | 19681 |
| COL | Colombia | 13934 | Tocancipa              | 0.14 | 0.14 | 0.14 | 20845 | 20845 | 20845 |
| COL | Colombia | 13935 | Topaipi                | 0.14 | 0.14 | 0.14 | 2728  | 2728  | 2728  |
| COL | Colombia | 13936 | Ubala                  | 0.14 | 0.14 | 0.14 | 4577  | 4577  | 4577  |
| COL | Colombia | 13937 | Ubaque                 | 0.14 | 0.14 | 0.14 | 18569 | 18569 | 18569 |
| COL | Colombia | 13938 | Ubate                  | 0.14 | 0.14 | 0.14 | 18112 | 18112 | 18112 |
| COL | Colombia | 13939 | Une                    | 0.14 | 0.14 | 0.14 | 21249 | 21249 | 21249 |
| COL | Colombia | 13940 | Utica                  | 0.14 | 0.14 | 0.14 | 2933  | 2933  | 2933  |
| COL | Colombia | 13941 | Venecia (ospina Perez) | 0.14 | 0.14 | 0.14 | 2118  | 2118  | 2118  |
| COL | Colombia | 13942 | Vergara                | 0.14 | 0.14 | 0.14 | 4871  | 4871  | 4871  |
| COL | Colombia | 13943 | Viani                  | 0.14 | 0.14 | 0.14 | 1799  | 1799  | 1799  |
| COL | Colombia | 13944 | Villagomez             | 0.14 | 0.14 | 0.14 | 2238  | 2238  | 2238  |
| COL | Colombia | 13945 | Villapinzon            | 0.14 | 0.14 | 0.14 | 9869  | 9869  | 9869  |
| COL | Colombia | 13946 | Villeta                | 0.14 | 0.14 | 0.14 | 12482 | 12482 | 12482 |
| COL | Colombia | 13947 | Viota                  | 0.14 | 0.14 | 0.14 | 8199  | 8199  | 8199  |
| COL | Colombia | 13948 | Yacopi                 | 0.14 | 0.14 | 0.14 | 10290 | 10290 | 10290 |
| COL | Colombia | 13949 | Zipacon                | 0.14 | 0.14 | 0.14 | 4719  | 4719  | 4719  |
| COL | Colombia | 13950 | Zipaquira              | 0.14 | 0.14 | 0.14 | 66663 | 66663 | 66663 |
| COL | Colombia | 13951 | Barranco Minas         | 0.14 | 0.14 | 0.14 | 12750 | 12750 | 12750 |
| COL | Colombia | 13952 | Cacahual               | 0.14 | 0.14 | 0.14 | 2538  | 2538  | 2538  |
| COL | Colombia | 13953 | Inirida                | 0.14 | 0.14 | 0.14 | 20530 | 20530 | 20530 |
| COL | Colombia | 13954 | La Guadalupe           | 0.14 | 0.14 | 0.14 | 289   | 289   | 289   |
| COL | Colombia | 13955 | Pana Pana              | 0.14 | 0.14 | 0.14 | 2743  | 2743  | 2743  |
| COL | Colombia | 13956 | Puerto Colombia        | 0.14 | 0.14 | 0.14 | 3808  | 3808  | 3808  |
| COL | Colombia | 13957 | San Felipe             | 0.14 | 0.14 | 0.14 | 1872  | 1872  | 1872  |
| COL | Colombia | 13958 | Barrancas              | 0.53 | 0.72 | 0.90 | 6551  | 1918  | 0     |
| COL | Colombia | 13959 | El Molino              | 0.53 | 0.72 | 0.90 | 774   | 226   | 0     |
| COL | Colombia | 13960 | Fonseca                | 0.53 | 0.72 | 0.90 | 8740  | 2558  | 0     |
| COL | Colombia | 13961 | Hato Nuevo             | 0.53 | 0.72 | 0.90 | 5872  | 1719  | 0     |
| COL | Colombia | 13962 | Maicao                 | 0.53 | 0.72 | 0.90 | 45619 | 13354 | 0     |

|     |          |       |                       |      |      |      |        |        |        |
|-----|----------|-------|-----------------------|------|------|------|--------|--------|--------|
| COL | Colombia | 13963 | Manaure               | 0.53 | 0.72 | 0.90 | 42849  | 12543  | 0      |
| COL | Colombia | 13964 | Riohacha              | 0.53 | 0.72 | 0.90 | 96883  | 28361  | 0      |
| COL | Colombia | 13965 | San Juan Del Cesar    | 0.53 | 0.72 | 0.90 | 11470  | 3358   | 0      |
| COL | Colombia | 13966 | Uribia                | 0.53 | 0.72 | 0.90 | 53343  | 15615  | 0      |
| COL | Colombia | 13967 | Urumita               | 0.53 | 0.72 | 0.90 | 7029   | 2058   | 0      |
| COL | Colombia | 13968 | Villanueva            | 0.53 | 0.72 | 0.90 | 7411   | 2169   | 0      |
| COL | Colombia | 13969 | Calamar               | 0.14 | 0.14 | 0.14 | 7235   | 7235   | 7235   |
| COL | Colombia | 13970 | El Retorno            | 0.14 | 0.14 | 0.14 | 9291   | 9291   | 9291   |
| COL | Colombia | 13971 | Miraflores            | 0.14 | 0.14 | 0.14 | 7257   | 7257   | 7257   |
| COL | Colombia | 13972 | San Jose Del Guaviare | 0.14 | 0.14 | 0.14 | 59192  | 59192  | 59192  |
| COL | Colombia | 13973 | Acevedo               | 0.14 | 0.14 | 0.14 | 15479  | 15479  | 15479  |
| COL | Colombia | 13974 | Agrado                | 0.14 | 0.14 | 0.14 | 6657   | 6657   | 6657   |
| COL | Colombia | 13975 | Aipe                  | 0.14 | 0.14 | 0.14 | 30882  | 30882  | 30882  |
| COL | Colombia | 13976 | Algeciras             | 0.14 | 0.14 | 0.14 | 18386  | 18386  | 18386  |
| COL | Colombia | 13977 | Altamira              | 0.14 | 0.14 | 0.14 | 4897   | 4897   | 4897   |
| COL | Colombia | 13978 | Baraya                | 0.14 | 0.14 | 0.14 | 3104   | 3104   | 3104   |
| COL | Colombia | 13979 | Campo Alegre          | 0.14 | 0.14 | 0.14 | 15524  | 15524  | 15524  |
| COL | Colombia | 13980 | Colombia              | 0.14 | 0.14 | 0.14 | 8023   | 8023   | 8023   |
| COL | Colombia | 13981 | Elias                 | 0.14 | 0.14 | 0.14 | 5455   | 5455   | 5455   |
| COL | Colombia | 13982 | Garzon                | 0.14 | 0.14 | 0.14 | 44007  | 44007  | 44007  |
| COL | Colombia | 13983 | Gigante               | 0.14 | 0.14 | 0.14 | 26767  | 26767  | 26767  |
| COL | Colombia | 13984 | Guadalupe             | 0.14 | 0.14 | 0.14 | 27782  | 27782  | 27782  |
| COL | Colombia | 13985 | Hobo                  | 0.14 | 0.14 | 0.14 | 4239   | 4239   | 4239   |
| COL | Colombia | 13986 | Iquira                | 0.14 | 0.14 | 0.14 | 9371   | 9371   | 9371   |
| COL | Colombia | 13987 | Isnos                 | 0.14 | 0.14 | 0.14 | 14685  | 14685  | 14685  |
| COL | Colombia | 13988 | La Argentina          | 0.14 | 0.14 | 0.14 | 7394   | 7394   | 7394   |
| COL | Colombia | 13989 | La Plata              | 0.14 | 0.14 | 0.14 | 40382  | 40382  | 40382  |
| COL | Colombia | 13990 | Nataga                | 0.14 | 0.14 | 0.14 | 6321   | 6321   | 6321   |
| COL | Colombia | 13991 | Neiva                 | 0.14 | 0.14 | 0.14 | 190695 | 190695 | 190695 |
| COL | Colombia | 13992 | Oporapa               | 0.14 | 0.14 | 0.14 | 10305  | 10305  | 10305  |
| COL | Colombia | 13993 | Paicol                | 0.14 | 0.14 | 0.14 | 3057   | 3057   | 3057   |
| COL | Colombia | 13994 | Palermo               | 0.14 | 0.14 | 0.14 | 16910  | 16910  | 16910  |
| COL | Colombia | 13995 | Palestina             | 0.14 | 0.14 | 0.14 | 14030  | 14030  | 14030  |

|     |          |       |                           |      |      |      |        |       |       |
|-----|----------|-------|---------------------------|------|------|------|--------|-------|-------|
| COL | Colombia | 13996 | Pital                     | 0.14 | 0.14 | 0.14 | 8260   | 8260  | 8260  |
| COL | Colombia | 13997 | Pitalito                  | 0.14 | 0.14 | 0.14 | 64574  | 64574 | 64574 |
| COL | Colombia | 13998 | Rivera                    | 0.14 | 0.14 | 0.14 | 26576  | 26576 | 26576 |
| COL | Colombia | 13999 | Salado Blanco             | 0.14 | 0.14 | 0.14 | 10068  | 10068 | 10068 |
| COL | Colombia | 14000 | San Agustin               | 0.14 | 0.14 | 0.14 | 28869  | 28869 | 28869 |
| COL | Colombia | 14001 | Santa Maria               | 0.14 | 0.14 | 0.14 | 6800   | 6800  | 6800  |
| COL | Colombia | 14002 | Suaza                     | 0.14 | 0.14 | 0.14 | 10690  | 10690 | 10690 |
| COL | Colombia | 14003 | Tarqui                    | 0.14 | 0.14 | 0.14 | 11689  | 11689 | 11689 |
| COL | Colombia | 14004 | Tello                     | 0.14 | 0.14 | 0.14 | 20838  | 20838 | 20838 |
| COL | Colombia | 14005 | Teruel                    | 0.14 | 0.14 | 0.14 | 9201   | 9201  | 9201  |
| COL | Colombia | 14006 | Tesalia                   | 0.14 | 0.14 | 0.14 | 9215   | 9215  | 9215  |
| COL | Colombia | 14007 | Timana                    | 0.14 | 0.14 | 0.14 | 18504  | 18504 | 18504 |
| COL | Colombia | 14008 | Villa Vieja               | 0.14 | 0.14 | 0.14 | 7189   | 7189  | 7189  |
| COL | Colombia | 14009 | Yaguara                   | 0.14 | 0.14 | 0.14 | 3837   | 3837  | 3837  |
| COL | Colombia | 14010 | Aracataca                 | 0.53 | 0.72 | 0.90 | 17105  | 5007  | 0     |
| COL | Colombia | 14011 | Ariguani                  | 0.53 | 0.72 | 0.90 | 10832  | 3171  | 0     |
| COL | Colombia | 14012 | Cerro San Antonio         | 0.53 | 0.72 | 0.90 | 4425   | 1295  | 0     |
| COL | Colombia | 14013 | Chivolo                   | 0.53 | 0.72 | 0.90 | 4867   | 1425  | 0     |
| COL | Colombia | 14014 | Cienaga                   | 0.53 | 0.72 | 0.90 | 43931  | 12860 | 0     |
| COL | Colombia | 14015 | El Banco                  | 0.53 | 0.72 | 0.90 | 12215  | 3576  | 0     |
| COL | Colombia | 14016 | El Piñon                  | 0.53 | 0.72 | 0.90 | 5150   | 1507  | 0     |
| COL | Colombia | 14017 | Fundacion                 | 0.53 | 0.72 | 0.90 | 15558  | 4554  | 0     |
| COL | Colombia | 14018 | Guamal                    | 0.53 | 0.72 | 0.90 | 7269   | 2128  | 0     |
| COL | Colombia | 14019 | Pedraza                   | 0.53 | 0.72 | 0.90 | 3650   | 1068  | 0     |
| COL | Colombia | 14020 | Pivijay                   | 0.53 | 0.72 | 0.90 | 13008  | 3808  | 0     |
| COL | Colombia | 14021 | Plato                     | 0.53 | 0.72 | 0.90 | 20382  | 5966  | 0     |
| COL | Colombia | 14022 | Pueblo Viejo              | 0.53 | 0.72 | 0.90 | 6832   | 2000  | 0     |
| COL | Colombia | 14023 | Remolino                  | 0.53 | 0.72 | 0.90 | 2964   | 868   | 0     |
| COL | Colombia | 14024 | Salamina                  | 0.53 | 0.72 | 0.90 | 2016   | 590   | 0     |
| COL | Colombia | 14025 | San Sebastian De Buenavis | 0.53 | 0.72 | 0.90 | 4578   | 1340  | 0     |
| COL | Colombia | 14026 | San Zenon                 | 0.53 | 0.72 | 0.90 | 2980   | 872   | 0     |
| COL | Colombia | 14027 | Santa Ana                 | 0.53 | 0.72 | 0.90 | 15400  | 4508  | 0     |
| COL | Colombia | 14028 | Santa Marta (dist. Esp.)  | 0.53 | 0.72 | 0.90 | 127588 | 37349 | 0     |

|     |          |       |                      |      |      |      |        |        |        |
|-----|----------|-------|----------------------|------|------|------|--------|--------|--------|
| COL | Colombia | 14030 | Tenerife             | 0.53 | 0.72 | 0.90 | 4929   | 1443   | 0      |
| COL | Colombia | 14031 | Acacias              | 0.14 | 0.14 | 0.14 | 38377  | 38377  | 38377  |
| COL | Colombia | 14032 | Barranca De Upia     | 0.14 | 0.14 | 0.14 | 2068   | 2068   | 2068   |
| COL | Colombia | 14033 | Cabuyaro             | 0.14 | 0.14 | 0.14 | 2615   | 2615   | 2615   |
| COL | Colombia | 14034 | Castilla La Nueva    | 0.14 | 0.14 | 0.14 | 7001   | 7001   | 7001   |
| COL | Colombia | 14035 | Cubarral             | 0.14 | 0.14 | 0.14 | 79535  | 79535  | 79535  |
| COL | Colombia | 14036 | Cumaral              | 0.14 | 0.14 | 0.14 | 6451   | 6451   | 6451   |
| COL | Colombia | 14037 | El Calvario          | 0.14 | 0.14 | 0.14 | 2068   | 2068   | 2068   |
| COL | Colombia | 14038 | El Castillo          | 0.14 | 0.14 | 0.14 | 6084   | 6084   | 6084   |
| COL | Colombia | 14039 | El Dorado            | 0.14 | 0.14 | 0.14 | 862    | 862    | 862    |
| COL | Colombia | 14040 | Fuente De Oro        | 0.14 | 0.14 | 0.14 | 13188  | 13188  | 13188  |
| COL | Colombia | 14041 | Granada              | 0.14 | 0.14 | 0.14 | 24141  | 24141  | 24141  |
| COL | Colombia | 14042 | Guamal               | 0.14 | 0.14 | 0.14 | 16394  | 16394  | 16394  |
| COL | Colombia | 14043 | La Macarena          | 0.14 | 0.14 | 0.14 | 29214  | 29214  | 29214  |
| COL | Colombia | 14044 | La Uribe             | 0.14 | 0.14 | 0.14 | 10856  | 10856  | 10856  |
| COL | Colombia | 14045 | Lejanias             | 0.14 | 0.14 | 0.14 | 3960   | 3960   | 3960   |
| COL | Colombia | 14046 | Mapiripan            | 0.14 | 0.14 | 0.14 | 15800  | 15800  | 15800  |
| COL | Colombia | 14047 | Mesetas              | 0.14 | 0.14 | 0.14 | 5218   | 5218   | 5218   |
| COL | Colombia | 14048 | Puerto Concordia     | 0.14 | 0.14 | 0.14 | 8930   | 8930   | 8930   |
| COL | Colombia | 14049 | Puerto Gaitan        | 0.14 | 0.14 | 0.14 | 11630  | 11630  | 11630  |
| COL | Colombia | 14050 | Puerto Lleras        | 0.14 | 0.14 | 0.14 | 5342   | 5342   | 5342   |
| COL | Colombia | 14051 | Puerto Lopez         | 0.14 | 0.14 | 0.14 | 20944  | 20944  | 20944  |
| COL | Colombia | 14052 | Puerto Rico          | 0.14 | 0.14 | 0.14 | 14745  | 14745  | 14745  |
| COL | Colombia | 14053 | Restrepo             | 0.14 | 0.14 | 0.14 | 46466  | 46466  | 46466  |
| COL | Colombia | 14054 | San Carlos De Guaroa | 0.14 | 0.14 | 0.14 | 12931  | 12931  | 12931  |
| COL | Colombia | 14055 | San Juan De Arama    | 0.14 | 0.14 | 0.14 | 3403   | 3403   | 3403   |
| COL | Colombia | 14056 | San Juanito          | 0.14 | 0.14 | 0.14 | 1312   | 1312   | 1312   |
| COL | Colombia | 14057 | San Martin           | 0.14 | 0.14 | 0.14 | 25620  | 25620  | 25620  |
| COL | Colombia | 14058 | Villavicencio        | 0.14 | 0.14 | 0.14 | 266771 | 266771 | 266771 |
| COL | Colombia | 14059 | Vistahermosa         | 0.14 | 0.14 | 0.14 | 14025  | 14025  | 14025  |
| COL | Colombia | 14060 | Alban                | 0.14 | 0.14 | 0.14 | 7641   | 7641   | 7641   |
| COL | Colombia | 14061 | Aldana               | 0.14 | 0.14 | 0.14 | 4010   | 4010   | 4010   |
| COL | Colombia | 14062 | Ancuya               | 0.14 | 0.14 | 0.14 | 4471   | 4471   | 4471   |



|     |          |       |                   |      |      |      |       |       |       |
|-----|----------|-------|-------------------|------|------|------|-------|-------|-------|
| COL | Colombia | 14063 | Arboleda          | 0.14 | 0.14 | 0.14 | 4207  | 4207  | 4207  |
| COL | Colombia | 14064 | Barbacoas         | 0.14 | 0.14 | 0.14 | 31427 | 31427 | 31427 |
| COL | Colombia | 14065 | Belen             | 0.14 | 0.14 | 0.14 | 3075  | 3075  | 3075  |
| COL | Colombia | 14066 | Buesaco           | 0.14 | 0.14 | 0.14 | 19661 | 19661 | 19661 |
| COL | Colombia | 14067 | Chachagui         | 0.14 | 0.14 | 0.14 | 2817  | 2817  | 2817  |
| COL | Colombia | 14068 | Colon             | 0.14 | 0.14 | 0.14 | 4560  | 4560  | 4560  |
| COL | Colombia | 14069 | Consaca           | 0.14 | 0.14 | 0.14 | 5640  | 5640  | 5640  |
| COL | Colombia | 14070 | Contadero         | 0.14 | 0.14 | 0.14 | 5179  | 5179  | 5179  |
| COL | Colombia | 14071 | Cordoba           | 0.14 | 0.14 | 0.14 | 7997  | 7997  | 7997  |
| COL | Colombia | 14072 | Cuaspu            | 0.14 | 0.14 | 0.14 | 4044  | 4044  | 4044  |
| COL | Colombia | 14073 | Cumbal            | 0.14 | 0.14 | 0.14 | 19432 | 19432 | 19432 |
| COL | Colombia | 14074 | Cumbitara         | 0.14 | 0.14 | 0.14 | 6192  | 6192  | 6192  |
| COL | Colombia | 14075 | El Charco         | 0.14 | 0.14 | 0.14 | 15740 | 15740 | 15740 |
| COL | Colombia | 14076 | El Charco (is.)   | 0.14 | 0.14 | 0.14 | 326   | 326   | 326   |
| COL | Colombia | 14077 | El Rosario        | 0.14 | 0.14 | 0.14 | 3751  | 3751  | 3751  |
| COL | Colombia | 14078 | El Tablon         | 0.14 | 0.14 | 0.14 | 28611 | 28611 | 28611 |
| COL | Colombia | 14079 | El Tambo          | 0.14 | 0.14 | 0.14 | 7924  | 7924  | 7924  |
| COL | Colombia | 14080 | Francisco Pizarro | 0.14 | 0.14 | 0.14 | 15607 | 15607 | 15607 |
| COL | Colombia | 14081 | Funes             | 0.14 | 0.14 | 0.14 | 8123  | 8123  | 8123  |
| COL | Colombia | 14082 | Guachucal         | 0.14 | 0.14 | 0.14 | 4912  | 4912  | 4912  |
| COL | Colombia | 14083 | Guaitarilla       | 0.14 | 0.14 | 0.14 | 9196  | 9196  | 9196  |
| COL | Colombia | 14084 | Gualmatan         | 0.14 | 0.14 | 0.14 | 4639  | 4639  | 4639  |
| COL | Colombia | 14085 | Iles              | 0.14 | 0.14 | 0.14 | 7072  | 7072  | 7072  |
| COL | Colombia | 14086 | Imues             | 0.14 | 0.14 | 0.14 | 4406  | 4406  | 4406  |
| COL | Colombia | 14087 | Ipiales           | 0.14 | 0.14 | 0.14 | 88872 | 88872 | 88872 |
| COL | Colombia | 14088 | La Cruz           | 0.14 | 0.14 | 0.14 | 16774 | 16774 | 16774 |
| COL | Colombia | 14089 | La Florida        | 0.14 | 0.14 | 0.14 | 7134  | 7134  | 7134  |
| COL | Colombia | 14090 | La Llanada        | 0.14 | 0.14 | 0.14 | 6456  | 6456  | 6456  |
| COL | Colombia | 14091 | La Tola           | 0.14 | 0.14 | 0.14 | 6465  | 6465  | 6465  |
| COL | Colombia | 14092 | La Union          | 0.14 | 0.14 | 0.14 | 11669 | 11669 | 11669 |
| COL | Colombia | 14093 | Leiva             | 0.14 | 0.14 | 0.14 | 10851 | 10851 | 10851 |
| COL | Colombia | 14094 | Linares           | 0.14 | 0.14 | 0.14 | 3349  | 3349  | 3349  |
| COL | Colombia | 14095 | Los Andes         | 0.14 | 0.14 | 0.14 | 6306  | 6306  | 6306  |

|     |          |       |                      |      |      |      |        |        |        |
|-----|----------|-------|----------------------|------|------|------|--------|--------|--------|
| COL | Colombia | 14096 | Magui                | 0.14 | 0.14 | 0.14 | 37902  | 37902  | 37902  |
| COL | Colombia | 14097 | Mallama              | 0.14 | 0.14 | 0.14 | 6968   | 6968   | 6968   |
| COL | Colombia | 14098 | Mosquera             | 0.14 | 0.14 | 0.14 | 7458   | 7458   | 7458   |
| COL | Colombia | 14099 | Mosquera (is.)       | 0.14 | 0.14 | 0.14 | 720    | 720    | 720    |
| COL | Colombia | 14100 | Olaya Herrera        | 0.14 | 0.14 | 0.14 | 18076  | 18076  | 18076  |
| COL | Colombia | 14101 | Ospina               | 0.14 | 0.14 | 0.14 | 6577   | 6577   | 6577   |
| COL | Colombia | 14102 | Pasto                | 0.14 | 0.14 | 0.14 | 263905 | 263905 | 263905 |
| COL | Colombia | 14103 | Policarpa            | 0.14 | 0.14 | 0.14 | 8353   | 8353   | 8353   |
| COL | Colombia | 14104 | Potosi               | 0.14 | 0.14 | 0.14 | 8939   | 8939   | 8939   |
| COL | Colombia | 14105 | Providencia          | 0.14 | 0.14 | 0.14 | 9439   | 9439   | 9439   |
| COL | Colombia | 14106 | Puerres              | 0.14 | 0.14 | 0.14 | 5331   | 5331   | 5331   |
| COL | Colombia | 14107 | Pupiales             | 0.14 | 0.14 | 0.14 | 12323  | 12323  | 12323  |
| COL | Colombia | 14108 | Ricaurte             | 0.14 | 0.14 | 0.14 | 24771  | 24771  | 24771  |
| COL | Colombia | 14109 | Roberto Payan        | 0.14 | 0.14 | 0.14 | 17013  | 17013  | 17013  |
| COL | Colombia | 14110 | Samaniego            | 0.14 | 0.14 | 0.14 | 19739  | 19739  | 19739  |
| COL | Colombia | 14111 | San Bernardo         | 0.14 | 0.14 | 0.14 | 7695   | 7695   | 7695   |
| COL | Colombia | 14112 | San Lorenzo          | 0.14 | 0.14 | 0.14 | 12707  | 12707  | 12707  |
| COL | Colombia | 14113 | San Pablo            | 0.14 | 0.14 | 0.14 | 8060   | 8060   | 8060   |
| COL | Colombia | 14114 | San Pedro De Cartago | 0.14 | 0.14 | 0.14 | 4198   | 4198   | 4198   |
| COL | Colombia | 14115 | Sandona              | 0.14 | 0.14 | 0.14 | 13296  | 13296  | 13296  |
| COL | Colombia | 14116 | Santa Barbara        | 0.14 | 0.14 | 0.14 | 12330  | 12330  | 12330  |
| COL | Colombia | 14117 | Santa Cruz           | 0.14 | 0.14 | 0.14 | 39067  | 39067  | 39067  |
| COL | Colombia | 14118 | Sapuyes              | 0.14 | 0.14 | 0.14 | 6479   | 6479   | 6479   |
| COL | Colombia | 14119 | Taminango            | 0.14 | 0.14 | 0.14 | 11159  | 11159  | 11159  |
| COL | Colombia | 14120 | Tangua               | 0.14 | 0.14 | 0.14 | 6219   | 6219   | 6219   |
| COL | Colombia | 14121 | Tumaco               | 0.14 | 0.14 | 0.14 | 88936  | 88936  | 88936  |
| COL | Colombia | 14122 | Tumaco (is.)         | 0.14 | 0.14 | 0.14 | 214    | 214    | 214    |
| COL | Colombia | 14123 | Tuquerres            | 0.14 | 0.14 | 0.14 | 20283  | 20283  | 20283  |
| COL | Colombia | 14124 | Yacuanquer           | 0.14 | 0.14 | 0.14 | 5823   | 5823   | 5823   |
| COL | Colombia | 14125 | Abrego               | 0.54 | 0.54 | 0.54 | 12220  | 12220  | 12220  |
| COL | Colombia | 14126 | Arboledas            | 0.54 | 0.54 | 0.54 | 2014   | 2014   | 2014   |
| COL | Colombia | 14127 | Bochalema            | 0.54 | 0.54 | 0.54 | 1523   | 1523   | 1523   |
| COL | Colombia | 14128 | Bucarasica           | 0.54 | 0.54 | 0.54 | 877    | 877    | 877    |

|     |          |       |                  |      |      |      |        |        |        |
|-----|----------|-------|------------------|------|------|------|--------|--------|--------|
| COL | Colombia | 14129 | Cachira          | 0.54 | 0.54 | 0.54 | 3542   | 3542   | 3542   |
| COL | Colombia | 14130 | Cacota           | 0.54 | 0.54 | 0.54 | 447    | 447    | 447    |
| COL | Colombia | 14131 | Chinacota        | 0.54 | 0.54 | 0.54 | 3114   | 3114   | 3114   |
| COL | Colombia | 14132 | Chitaga          | 0.54 | 0.54 | 0.54 | 2655   | 2655   | 2655   |
| COL | Colombia | 14133 | Convencion       | 0.54 | 0.54 | 0.54 | 4115   | 4115   | 4115   |
| COL | Colombia | 14134 | Cucuta           | 0.54 | 0.54 | 0.54 | 137750 | 137750 | 137750 |
| COL | Colombia | 14135 | Cucutilla        | 0.54 | 0.54 | 0.54 | 2907   | 2907   | 2907   |
| COL | Colombia | 14136 | Durania          | 0.54 | 0.54 | 0.54 | 835    | 835    | 835    |
| COL | Colombia | 14137 | El Carmen        | 0.54 | 0.54 | 0.54 | 7387   | 7387   | 7387   |
| COL | Colombia | 14138 | El Tarra         | 0.54 | 0.54 | 0.54 | 2366   | 2366   | 2366   |
| COL | Colombia | 14139 | El Zulia         | 0.54 | 0.54 | 0.54 | 4964   | 4964   | 4964   |
| COL | Colombia | 14140 | Gramalote        | 0.54 | 0.54 | 0.54 | 1205   | 1205   | 1205   |
| COL | Colombia | 14141 | Hacari           | 0.54 | 0.54 | 0.54 | 2204   | 2204   | 2204   |
| COL | Colombia | 14142 | Herran           | 0.54 | 0.54 | 0.54 | 1496   | 1496   | 1496   |
| COL | Colombia | 14143 | La Esperanza     | 0.54 | 0.54 | 0.54 | 2507   | 2507   | 2507   |
| COL | Colombia | 14144 | La Playa         | 0.54 | 0.54 | 0.54 | 3550   | 3550   | 3550   |
| COL | Colombia | 14145 | Labateca         | 0.54 | 0.54 | 0.54 | 3168   | 3168   | 3168   |
| COL | Colombia | 14146 | Los Patios       | 0.54 | 0.54 | 0.54 | 7948   | 7948   | 7948   |
| COL | Colombia | 14147 | Lourdes          | 0.54 | 0.54 | 0.54 | 779    | 779    | 779    |
| COL | Colombia | 14148 | Mutiscua         | 0.54 | 0.54 | 0.54 | 718    | 718    | 718    |
| COL | Colombia | 14149 | Ocaña            | 0.54 | 0.54 | 0.54 | 16232  | 16232  | 16232  |
| COL | Colombia | 14150 | Pamplona         | 0.54 | 0.54 | 0.54 | 8106   | 8106   | 8106   |
| COL | Colombia | 14151 | Pamplonita       | 0.54 | 0.54 | 0.54 | 3610   | 3610   | 3610   |
| COL | Colombia | 14152 | Puerto Santander | 0.54 | 0.54 | 0.54 | 18299  | 18299  | 18299  |
| COL | Colombia | 14153 | Ragonvalia       | 0.54 | 0.54 | 0.54 | 1840   | 1840   | 1840   |
| COL | Colombia | 14154 | Salazar          | 0.54 | 0.54 | 0.54 | 1919   | 1919   | 1919   |
| COL | Colombia | 14155 | San Calixto      | 0.54 | 0.54 | 0.54 | 3817   | 3817   | 3817   |
| COL | Colombia | 14156 | San Cayetano     | 0.54 | 0.54 | 0.54 | 1169   | 1169   | 1169   |
| COL | Colombia | 14157 | Santiago         | 0.54 | 0.54 | 0.54 | 682    | 682    | 682    |
| COL | Colombia | 14158 | Sardinata        | 0.54 | 0.54 | 0.54 | 5364   | 5364   | 5364   |
| COL | Colombia | 14159 | Silos            | 0.54 | 0.54 | 0.54 | 1717   | 1717   | 1717   |
| COL | Colombia | 14160 | Teorama          | 0.54 | 0.54 | 0.54 | 5610   | 5610   | 5610   |
| COL | Colombia | 14161 | Tibu             | 0.54 | 0.54 | 0.54 | 15330  | 15330  | 15330  |

|     |          |       |                          |      |      |      |        |        |        |
|-----|----------|-------|--------------------------|------|------|------|--------|--------|--------|
| COL | Colombia | 14162 | Toledo                   | 0.54 | 0.54 | 0.54 | 5042   | 5042   | 5042   |
| COL | Colombia | 14163 | Villa Caro               | 0.54 | 0.54 | 0.54 | 1434   | 1434   | 1434   |
| COL | Colombia | 14164 | Villa Del Rosario        | 0.54 | 0.54 | 0.54 | 39260  | 39260  | 39260  |
| COL | Colombia | 14165 | Colon                    | 0.14 | 0.14 | 0.14 | 5429   | 5429   | 5429   |
| COL | Colombia | 14166 | Mocoa                    | 0.14 | 0.14 | 0.14 | 23006  | 23006  | 23006  |
| COL | Colombia | 14167 | Orito                    | 0.14 | 0.14 | 0.14 | 43618  | 43618  | 43618  |
| COL | Colombia | 14168 | Puerto Asis              | 0.14 | 0.14 | 0.14 | 41365  | 41365  | 41365  |
| COL | Colombia | 14169 | Puerto Caicedo           | 0.14 | 0.14 | 0.14 | 18926  | 18926  | 18926  |
| COL | Colombia | 14170 | Puerto Guzman            | 0.14 | 0.14 | 0.14 | 14850  | 14850  | 14850  |
| COL | Colombia | 14171 | Puerto Leguizamo         | 0.14 | 0.14 | 0.14 | 9590   | 9590   | 9590   |
| COL | Colombia | 14172 | San Francisco            | 0.14 | 0.14 | 0.14 | 16543  | 16543  | 16543  |
| COL | Colombia | 14173 | Santiago                 | 0.14 | 0.14 | 0.14 | 30398  | 30398  | 30398  |
| COL | Colombia | 14174 | Sibundoy                 | 0.14 | 0.14 | 0.14 | 3959   | 3959   | 3959   |
| COL | Colombia | 14175 | Valle Del Guamez (la Hor | 0.14 | 0.14 | 0.14 | 54504  | 54504  | 54504  |
| COL | Colombia | 14176 | Villagarzon              | 0.14 | 0.14 | 0.14 | 10222  | 10222  | 10222  |
| COL | Colombia | 14177 | Armenia                  | 0.14 | 0.14 | 0.14 | 141946 | 141946 | 141946 |
| COL | Colombia | 14178 | Buenavista               | 0.14 | 0.14 | 0.14 | 8962   | 8962   | 8962   |
| COL | Colombia | 14179 | Calarca                  | 0.14 | 0.14 | 0.14 | 65780  | 65780  | 65780  |
| COL | Colombia | 14180 | Circasia                 | 0.14 | 0.14 | 0.14 | 11903  | 11903  | 11903  |
| COL | Colombia | 14181 | Cordoba                  | 0.14 | 0.14 | 0.14 | 2702   | 2702   | 2702   |
| COL | Colombia | 14182 | Filandia                 | 0.14 | 0.14 | 0.14 | 19467  | 19467  | 19467  |
| COL | Colombia | 14183 | Genova                   | 0.14 | 0.14 | 0.14 | 5714   | 5714   | 5714   |
| COL | Colombia | 14184 | La Tebaida               | 0.14 | 0.14 | 0.14 | 21624  | 21624  | 21624  |
| COL | Colombia | 14185 | Montenegro               | 0.14 | 0.14 | 0.14 | 40254  | 40254  | 40254  |
| COL | Colombia | 14186 | Pijao                    | 0.14 | 0.14 | 0.14 | 4908   | 4908   | 4908   |
| COL | Colombia | 14187 | Quimbaya                 | 0.14 | 0.14 | 0.14 | 11507  | 11507  | 11507  |
| COL | Colombia | 14188 | Salento                  | 0.14 | 0.14 | 0.14 | 39620  | 39620  | 39620  |
| COL | Colombia | 14189 | Apia                     | 0.14 | 0.14 | 0.14 | 8152   | 8152   | 8152   |
| COL | Colombia | 14190 | Balboa                   | 0.14 | 0.14 | 0.14 | 5629   | 5629   | 5629   |
| COL | Colombia | 14191 | Belen De Umbria          | 0.14 | 0.14 | 0.14 | 13568  | 13568  | 13568  |
| COL | Colombia | 14192 | Dos Quebradas            | 0.14 | 0.14 | 0.14 | 81165  | 81165  | 81165  |
| COL | Colombia | 14193 | Guatica                  | 0.14 | 0.14 | 0.14 | 5230   | 5230   | 5230   |
| COL | Colombia | 14194 | La Celia                 | 0.14 | 0.14 | 0.14 | 1882   | 1882   | 1882   |

|     |          |       |                     |      |      |      |        |        |        |
|-----|----------|-------|---------------------|------|------|------|--------|--------|--------|
| COL | Colombia | 14195 | La Virginia         | 0.14 | 0.14 | 0.14 | 10151  | 10151  | 10151  |
| COL | Colombia | 14196 | Marsella            | 0.14 | 0.14 | 0.14 | 31328  | 31328  | 31328  |
| COL | Colombia | 14197 | Mistrato            | 0.14 | 0.14 | 0.14 | 8216   | 8216   | 8216   |
| COL | Colombia | 14198 | Pereira             | 0.14 | 0.14 | 0.14 | 273484 | 273484 | 273484 |
| COL | Colombia | 14199 | Pueblo Rico         | 0.14 | 0.14 | 0.14 | 10338  | 10338  | 10338  |
| COL | Colombia | 14200 | Quinchia            | 0.14 | 0.14 | 0.14 | 17041  | 17041  | 17041  |
| COL | Colombia | 14201 | Santa Rosa De Cabal | 0.14 | 0.14 | 0.14 | 116669 | 116669 | 116669 |
| COL | Colombia | 14202 | Santuario           | 0.14 | 0.14 | 0.14 | 7709   | 7709   | 7709   |
| COL | Colombia | 14206 | Aguada              | 0.14 | 0.14 | 0.14 | 913    | 913    | 913    |
| COL | Colombia | 14207 | Albania             | 0.14 | 0.14 | 0.14 | 5199   | 5199   | 5199   |
| COL | Colombia | 14208 | Aratoca             | 0.14 | 0.14 | 0.14 | 4933   | 4933   | 4933   |
| COL | Colombia | 14209 | Barbosa             | 0.14 | 0.14 | 0.14 | 10429  | 10429  | 10429  |
| COL | Colombia | 14210 | Barichara           | 0.14 | 0.14 | 0.14 | 2709   | 2709   | 2709   |
| COL | Colombia | 14211 | Barrancabermeja     | 0.14 | 0.14 | 0.14 | 114832 | 114832 | 114832 |
| COL | Colombia | 14212 | Betulia             | 0.14 | 0.14 | 0.14 | 3745   | 3745   | 3745   |
| COL | Colombia | 14213 | Bolivar             | 0.14 | 0.14 | 0.14 | 20051  | 20051  | 20051  |
| COL | Colombia | 14214 | Bucaramanga         | 0.14 | 0.14 | 0.14 | 287380 | 287380 | 287380 |
| COL | Colombia | 14215 | Cabrera             | 0.14 | 0.14 | 0.14 | 8424   | 8424   | 8424   |
| COL | Colombia | 14216 | California          | 0.14 | 0.14 | 0.14 | 1251   | 1251   | 1251   |
| COL | Colombia | 14217 | Capitanejo          | 0.14 | 0.14 | 0.14 | 3408   | 3408   | 3408   |
| COL | Colombia | 14218 | Carcasi             | 0.14 | 0.14 | 0.14 | 3196   | 3196   | 3196   |
| COL | Colombia | 14219 | Cepita              | 0.14 | 0.14 | 0.14 | 3411   | 3411   | 3411   |
| COL | Colombia | 14220 | Cerrito             | 0.14 | 0.14 | 0.14 | 4001   | 4001   | 4001   |
| COL | Colombia | 14221 | Charala             | 0.14 | 0.14 | 0.14 | 8361   | 8361   | 8361   |
| COL | Colombia | 14222 | Charta              | 0.14 | 0.14 | 0.14 | 10892  | 10892  | 10892  |
| COL | Colombia | 14223 | Chima               | 0.14 | 0.14 | 0.14 | 2323   | 2323   | 2323   |
| COL | Colombia | 14224 | Chipata             | 0.14 | 0.14 | 0.14 | 3067   | 3067   | 3067   |
| COL | Colombia | 14225 | Cimitarra           | 0.14 | 0.14 | 0.14 | 27339  | 27339  | 27339  |
| COL | Colombia | 14226 | Concepcion          | 0.14 | 0.14 | 0.14 | 8944   | 8944   | 8944   |
| COL | Colombia | 14227 | Confines            | 0.14 | 0.14 | 0.14 | 1466   | 1466   | 1466   |
| COL | Colombia | 14228 | Contratacion        | 0.14 | 0.14 | 0.14 | 1398   | 1398   | 1398   |
| COL | Colombia | 14229 | Coromoro            | 0.14 | 0.14 | 0.14 | 4452   | 4452   | 4452   |
| COL | Colombia | 14230 | Curiti              | 0.14 | 0.14 | 0.14 | 11098  | 11098  | 11098  |

|     |          |       |               |      |      |      |        |        |        |
|-----|----------|-------|---------------|------|------|------|--------|--------|--------|
| COL | Colombia | 14231 | El Carmen     | 0.14 | 0.14 | 0.14 | 15076  | 15076  | 15076  |
| COL | Colombia | 14232 | El Guacamayo  | 0.14 | 0.14 | 0.14 | 1154   | 1154   | 1154   |
| COL | Colombia | 14233 | El Peñon      | 0.14 | 0.14 | 0.14 | 4720   | 4720   | 4720   |
| COL | Colombia | 14234 | El Playon     | 0.14 | 0.14 | 0.14 | 11900  | 11900  | 11900  |
| COL | Colombia | 14235 | Encino        | 0.14 | 0.14 | 0.14 | 12965  | 12965  | 12965  |
| COL | Colombia | 14236 | Enciso        | 0.14 | 0.14 | 0.14 | 5749   | 5749   | 5749   |
| COL | Colombia | 14237 | Florian       | 0.14 | 0.14 | 0.14 | 4053   | 4053   | 4053   |
| COL | Colombia | 14238 | Floridablanca | 0.14 | 0.14 | 0.14 | 153079 | 153079 | 153079 |
| COL | Colombia | 14239 | Galan         | 0.14 | 0.14 | 0.14 | 1690   | 1690   | 1690   |
| COL | Colombia | 14240 | Gambita       | 0.14 | 0.14 | 0.14 | 4611   | 4611   | 4611   |
| COL | Colombia | 14241 | Giron         | 0.14 | 0.14 | 0.14 | 96208  | 96208  | 96208  |
| COL | Colombia | 14242 | Guaca         | 0.14 | 0.14 | 0.14 | 4407   | 4407   | 4407   |
| COL | Colombia | 14243 | Guadalupe     | 0.14 | 0.14 | 0.14 | 3111   | 3111   | 3111   |
| COL | Colombia | 14244 | Guapota       | 0.14 | 0.14 | 0.14 | 1396   | 1396   | 1396   |
| COL | Colombia | 14245 | Guavata       | 0.14 | 0.14 | 0.14 | 2202   | 2202   | 2202   |
| COL | Colombia | 14246 | Guepsa        | 0.14 | 0.14 | 0.14 | 2360   | 2360   | 2360   |
| COL | Colombia | 14247 | Hato          | 0.14 | 0.14 | 0.14 | 1409   | 1409   | 1409   |
| COL | Colombia | 14248 | Jesus Maria   | 0.14 | 0.14 | 0.14 | 2579   | 2579   | 2579   |
| COL | Colombia | 14249 | Jordan        | 0.14 | 0.14 | 0.14 | 1077   | 1077   | 1077   |
| COL | Colombia | 14250 | La Belleza    | 0.14 | 0.14 | 0.14 | 6073   | 6073   | 6073   |
| COL | Colombia | 14251 | La Paz        | 0.14 | 0.14 | 0.14 | 6249   | 6249   | 6249   |
| COL | Colombia | 14252 | Landazuri     | 0.14 | 0.14 | 0.14 | 8918   | 8918   | 8918   |
| COL | Colombia | 14253 | Lebrija       | 0.14 | 0.14 | 0.14 | 34121  | 34121  | 34121  |
| COL | Colombia | 14254 | Los Santos    | 0.14 | 0.14 | 0.14 | 8249   | 8249   | 8249   |
| COL | Colombia | 14255 | Macaravita    | 0.14 | 0.14 | 0.14 | 1961   | 1961   | 1961   |
| COL | Colombia | 14256 | Malaga        | 0.14 | 0.14 | 0.14 | 4467   | 4467   | 4467   |
| COL | Colombia | 14257 | Matanza       | 0.14 | 0.14 | 0.14 | 45527  | 45527  | 45527  |
| COL | Colombia | 14258 | Mogotes       | 0.14 | 0.14 | 0.14 | 9228   | 9228   | 9228   |
| COL | Colombia | 14259 | Molagavita    | 0.14 | 0.14 | 0.14 | 2831   | 2831   | 2831   |
| COL | Colombia | 14260 | Ocamonte      | 0.14 | 0.14 | 0.14 | 1752   | 1752   | 1752   |
| COL | Colombia | 14261 | Oiba          | 0.14 | 0.14 | 0.14 | 6546   | 6546   | 6546   |
| COL | Colombia | 14262 | Onzaga        | 0.14 | 0.14 | 0.14 | 2377   | 2377   | 2377   |
| COL | Colombia | 14263 | Palmar        | 0.14 | 0.14 | 0.14 | 877    | 877    | 877    |

|     |          |       |                        |      |      |      |       |       |       |
|-----|----------|-------|------------------------|------|------|------|-------|-------|-------|
| COL | Colombia | 14264 | Palmas Del Socorro     | 0.14 | 0.14 | 0.14 | 2062  | 2062  | 2062  |
| COL | Colombia | 14265 | Paramo                 | 0.14 | 0.14 | 0.14 | 3753  | 3753  | 3753  |
| COL | Colombia | 14266 | Piedecuesta            | 0.14 | 0.14 | 0.14 | 93832 | 93832 | 93832 |
| COL | Colombia | 14267 | Pinchote               | 0.14 | 0.14 | 0.14 | 3807  | 3807  | 3807  |
| COL | Colombia | 14268 | Puente Nacional        | 0.14 | 0.14 | 0.14 | 8099  | 8099  | 8099  |
| COL | Colombia | 14269 | Puerto Parra           | 0.14 | 0.14 | 0.14 | 6776  | 6776  | 6776  |
| COL | Colombia | 14270 | Puerto Wilches         | 0.14 | 0.14 | 0.14 | 30633 | 30633 | 30633 |
| COL | Colombia | 14271 | Rionegro               | 0.14 | 0.14 | 0.14 | 20718 | 20718 | 20718 |
| COL | Colombia | 14272 | Sabana De Torres       | 0.14 | 0.14 | 0.14 | 11055 | 11055 | 11055 |
| COL | Colombia | 14273 | San Andres             | 0.14 | 0.14 | 0.14 | 4458  | 4458  | 4458  |
| COL | Colombia | 14274 | San Benito             | 0.14 | 0.14 | 0.14 | 1808  | 1808  | 1808  |
| COL | Colombia | 14275 | San Gil                | 0.14 | 0.14 | 0.14 | 24569 | 24569 | 24569 |
| COL | Colombia | 14276 | San Joaquin            | 0.14 | 0.14 | 0.14 | 1455  | 1455  | 1455  |
| COL | Colombia | 14277 | San Jose Miranda       | 0.14 | 0.14 | 0.14 | 1614  | 1614  | 1614  |
| COL | Colombia | 14278 | San Miguel             | 0.14 | 0.14 | 0.14 | 1963  | 1963  | 1963  |
| COL | Colombia | 14279 | San Vicente De Chucuri | 0.14 | 0.14 | 0.14 | 22148 | 22148 | 22148 |
| COL | Colombia | 14280 | Santa Barbara          | 0.14 | 0.14 | 0.14 | 16391 | 16391 | 16391 |
| COL | Colombia | 14281 | Santa Helena De Opon   | 0.14 | 0.14 | 0.14 | 3370  | 3370  | 3370  |
| COL | Colombia | 14282 | Simacota               | 0.14 | 0.14 | 0.14 | 6321  | 6321  | 6321  |
| COL | Colombia | 14283 | Socorro                | 0.14 | 0.14 | 0.14 | 17442 | 17442 | 17442 |
| COL | Colombia | 14284 | Suaita                 | 0.14 | 0.14 | 0.14 | 7900  | 7900  | 7900  |
| COL | Colombia | 14285 | Sucre                  | 0.14 | 0.14 | 0.14 | 4341  | 4341  | 4341  |
| COL | Colombia | 14286 | Surata                 | 0.14 | 0.14 | 0.14 | 2493  | 2493  | 2493  |
| COL | Colombia | 14287 | Tona                   | 0.14 | 0.14 | 0.14 | 63770 | 63770 | 63770 |
| COL | Colombia | 14288 | Valle De San Jose      | 0.14 | 0.14 | 0.14 | 2497  | 2497  | 2497  |
| COL | Colombia | 14289 | Velez                  | 0.14 | 0.14 | 0.14 | 7675  | 7675  | 7675  |
| COL | Colombia | 14290 | Vetas                  | 0.14 | 0.14 | 0.14 | 2385  | 2385  | 2385  |
| COL | Colombia | 14291 | Villanueva             | 0.14 | 0.14 | 0.14 | 3634  | 3634  | 3634  |
| COL | Colombia | 14292 | Zapatoca               | 0.14 | 0.14 | 0.14 | 5891  | 5891  | 5891  |
| COL | Colombia | 14293 | Buenavista             | 0.14 | 0.14 | 0.14 | 6206  | 6206  | 6206  |
| COL | Colombia | 14294 | Caimito                | 0.14 | 0.14 | 0.14 | 7777  | 7777  | 7777  |
| COL | Colombia | 14295 | Chalan                 | 0.14 | 0.14 | 0.14 | 3013  | 3013  | 3013  |
| COL | Colombia | 14296 | Coloso (ricaurte)      | 0.14 | 0.14 | 0.14 | 3638  | 3638  | 3638  |

|     |          |       |                     |      |      |      |        |        |        |
|-----|----------|-------|---------------------|------|------|------|--------|--------|--------|
| COL | Colombia | 14297 | Corozal             | 0.14 | 0.14 | 0.14 | 45580  | 45580  | 45580  |
| COL | Colombia | 14298 | Galeras             | 0.14 | 0.14 | 0.14 | 11378  | 11378  | 11378  |
| COL | Colombia | 14299 | Guaranda            | 0.14 | 0.14 | 0.14 | 15004  | 15004  | 15004  |
| COL | Colombia | 14300 | La Union            | 0.14 | 0.14 | 0.14 | 9837   | 9837   | 9837   |
| COL | Colombia | 14301 | Los Palmitos        | 0.14 | 0.14 | 0.14 | 11948  | 11948  | 11948  |
| COL | Colombia | 14302 | Majagual            | 0.14 | 0.14 | 0.14 | 12669  | 12669  | 12669  |
| COL | Colombia | 14303 | Morroa              | 0.14 | 0.14 | 0.14 | 10300  | 10300  | 10300  |
| COL | Colombia | 14304 | Ovejas              | 0.14 | 0.14 | 0.14 | 14517  | 14517  | 14517  |
| COL | Colombia | 14305 | Palmito             | 0.14 | 0.14 | 0.14 | 18794  | 18794  | 18794  |
| COL | Colombia | 14306 | Sampues             | 0.14 | 0.14 | 0.14 | 26074  | 26074  | 26074  |
| COL | Colombia | 14307 | San Benito Abad     | 0.14 | 0.14 | 0.14 | 20435  | 20435  | 20435  |
| COL | Colombia | 14308 | San Juan De Betulia | 0.14 | 0.14 | 0.14 | 12676  | 12676  | 12676  |
| COL | Colombia | 14309 | San Marcos          | 0.14 | 0.14 | 0.14 | 41472  | 41472  | 41472  |
| COL | Colombia | 14310 | San Onofre          | 0.14 | 0.14 | 0.14 | 31052  | 31052  | 31052  |
| COL | Colombia | 14312 | San Pedro           | 0.14 | 0.14 | 0.14 | 9527   | 9527   | 9527   |
| COL | Colombia | 14313 | Since               | 0.14 | 0.14 | 0.14 | 17838  | 17838  | 17838  |
| COL | Colombia | 14314 | Sincelejo           | 0.14 | 0.14 | 0.14 | 172247 | 172247 | 172247 |
| COL | Colombia | 14315 | Sucre               | 0.14 | 0.14 | 0.14 | 12734  | 12734  | 12734  |
| COL | Colombia | 14316 | Tolu                | 0.14 | 0.14 | 0.14 | 30603  | 30603  | 30603  |
| COL | Colombia | 14317 | Toluviejo           | 0.14 | 0.14 | 0.14 | 11741  | 11741  | 11741  |
| COL | Colombia | 14318 | Alpujarra           | 0.14 | 0.14 | 0.14 | 3754   | 3754   | 3754   |
| COL | Colombia | 14319 | Alvarado            | 0.14 | 0.14 | 0.14 | 19650  | 19650  | 19650  |
| COL | Colombia | 14320 | Ambalema            | 0.14 | 0.14 | 0.14 | 5697   | 5697   | 5697   |
| COL | Colombia | 14321 | Anzoategui          | 0.14 | 0.14 | 0.14 | 41054  | 41054  | 41054  |
| COL | Colombia | 14322 | Armero (guayabal)   | 0.14 | 0.14 | 0.14 | 11981  | 11981  | 11981  |
| COL | Colombia | 14323 | Ataco               | 0.14 | 0.14 | 0.14 | 14389  | 14389  | 14389  |
| COL | Colombia | 14324 | Cajamarca           | 0.14 | 0.14 | 0.14 | 18822  | 18822  | 18822  |
| COL | Colombia | 14325 | Carmen De Apicala   | 0.14 | 0.14 | 0.14 | 5206   | 5206   | 5206   |
| COL | Colombia | 14326 | Casabianca          | 0.14 | 0.14 | 0.14 | 4413   | 4413   | 4413   |
| COL | Colombia | 14327 | Chaparral           | 0.14 | 0.14 | 0.14 | 40950  | 40950  | 40950  |
| COL | Colombia | 14328 | Coello              | 0.14 | 0.14 | 0.14 | 22288  | 22288  | 22288  |
| COL | Colombia | 14329 | Coyaima             | 0.14 | 0.14 | 0.14 | 15391  | 15391  | 15391  |
| COL | Colombia | 14330 | Cunday              | 0.14 | 0.14 | 0.14 | 8393   | 8393   | 8393   |



|     |          |       |                   |      |      |      |        |        |        |
|-----|----------|-------|-------------------|------|------|------|--------|--------|--------|
| COL | Colombia | 14331 | Dolores           | 0.14 | 0.14 | 0.14 | 5547   | 5547   | 5547   |
| COL | Colombia | 14332 | Espinal           | 0.14 | 0.14 | 0.14 | 41104  | 41104  | 41104  |
| COL | Colombia | 14333 | Falan             | 0.14 | 0.14 | 0.14 | 11476  | 11476  | 11476  |
| COL | Colombia | 14334 | Flandes           | 0.14 | 0.14 | 0.14 | 19205  | 19205  | 19205  |
| COL | Colombia | 14335 | Fresno            | 0.14 | 0.14 | 0.14 | 16818  | 16818  | 16818  |
| COL | Colombia | 14336 | Guamo             | 0.14 | 0.14 | 0.14 | 21908  | 21908  | 21908  |
| COL | Colombia | 14337 | Herveo            | 0.14 | 0.14 | 0.14 | 13411  | 13411  | 13411  |
| COL | Colombia | 14338 | Honda             | 0.14 | 0.14 | 0.14 | 14327  | 14327  | 14327  |
| COL | Colombia | 14339 | Ibague            | 0.14 | 0.14 | 0.14 | 281191 | 281191 | 281191 |
| COL | Colombia | 14340 | Icononzo          | 0.14 | 0.14 | 0.14 | 12594  | 12594  | 12594  |
| COL | Colombia | 14341 | Lerida            | 0.14 | 0.14 | 0.14 | 15994  | 15994  | 15994  |
| COL | Colombia | 14342 | Libano            | 0.14 | 0.14 | 0.14 | 16487  | 16487  | 16487  |
| COL | Colombia | 14343 | Mariquita         | 0.14 | 0.14 | 0.14 | 21648  | 21648  | 21648  |
| COL | Colombia | 14344 | Melgar            | 0.14 | 0.14 | 0.14 | 16498  | 16498  | 16498  |
| COL | Colombia | 14345 | Murillo           | 0.14 | 0.14 | 0.14 | 2929   | 2929   | 2929   |
| COL | Colombia | 14346 | Natagaima         | 0.14 | 0.14 | 0.14 | 16732  | 16732  | 16732  |
| COL | Colombia | 14347 | Ortega            | 0.14 | 0.14 | 0.14 | 19858  | 19858  | 19858  |
| COL | Colombia | 14348 | Piedras           | 0.14 | 0.14 | 0.14 | 8869   | 8869   | 8869   |
| COL | Colombia | 14349 | Planadas          | 0.14 | 0.14 | 0.14 | 15987  | 15987  | 15987  |
| COL | Colombia | 14350 | Prado             | 0.14 | 0.14 | 0.14 | 4547   | 4547   | 4547   |
| COL | Colombia | 14351 | Purificacion      | 0.14 | 0.14 | 0.14 | 18985  | 18985  | 18985  |
| COL | Colombia | 14352 | Rioblanco         | 0.14 | 0.14 | 0.14 | 24551  | 24551  | 24551  |
| COL | Colombia | 14353 | Roncesvalles      | 0.14 | 0.14 | 0.14 | 3798   | 3798   | 3798   |
| COL | Colombia | 14354 | Rovira            | 0.14 | 0.14 | 0.14 | 37002  | 37002  | 37002  |
| COL | Colombia | 14355 | Saldaña           | 0.14 | 0.14 | 0.14 | 5319   | 5319   | 5319   |
| COL | Colombia | 14356 | San Antonio       | 0.14 | 0.14 | 0.14 | 7909   | 7909   | 7909   |
| COL | Colombia | 14357 | San Luis          | 0.14 | 0.14 | 0.14 | 12171  | 12171  | 12171  |
| COL | Colombia | 14358 | Santa Isabel      | 0.14 | 0.14 | 0.14 | 12080  | 12080  | 12080  |
| COL | Colombia | 14359 | Suarez            | 0.14 | 0.14 | 0.14 | 7824   | 7824   | 7824   |
| COL | Colombia | 14360 | Valle De San Juan | 0.14 | 0.14 | 0.14 | 3979   | 3979   | 3979   |
| COL | Colombia | 14361 | Venadillo         | 0.14 | 0.14 | 0.14 | 9159   | 9159   | 9159   |
| COL | Colombia | 14362 | Villa Hermosa     | 0.14 | 0.14 | 0.14 | 5311   | 5311   | 5311   |
| COL | Colombia | 14363 | Villarrica        | 0.14 | 0.14 | 0.14 | 4483   | 4483   | 4483   |

|     |          |       |                    |      |      |      |         |         |         |
|-----|----------|-------|--------------------|------|------|------|---------|---------|---------|
| COL | Colombia | 14364 | Alcala             | 0.14 | 0.14 | 0.14 | 22799   | 22799   | 22799   |
| COL | Colombia | 14365 | Andalucia          | 0.14 | 0.14 | 0.14 | 24041   | 24041   | 24041   |
| COL | Colombia | 14366 | Ansermanuevo       | 0.14 | 0.14 | 0.14 | 10635   | 10635   | 10635   |
| COL | Colombia | 14367 | Argelia            | 0.14 | 0.14 | 0.14 | 4771    | 4771    | 4771    |
| COL | Colombia | 14368 | Bolivar            | 0.14 | 0.14 | 0.14 | 9989    | 9989    | 9989    |
| COL | Colombia | 14369 | Buenaventura       | 0.14 | 0.14 | 0.14 | 250282  | 250282  | 250282  |
| COL | Colombia | 14370 | Buenaventura (is.) | 0.14 | 0.14 | 0.14 | 2304    | 2304    | 2304    |
| COL | Colombia | 14371 | Buga               | 0.14 | 0.14 | 0.14 | 92042   | 92042   | 92042   |
| COL | Colombia | 14372 | Bugalagrande       | 0.14 | 0.14 | 0.14 | 14221   | 14221   | 14221   |
| COL | Colombia | 14373 | Caicedonia         | 0.14 | 0.14 | 0.14 | 10624   | 10624   | 10624   |
| COL | Colombia | 14374 | Cali               | 0.14 | 0.14 | 0.14 | 1181123 | 1181123 | 1181123 |
| COL | Colombia | 14375 | Calima (darien)    | 0.14 | 0.14 | 0.14 | 10595   | 10595   | 10595   |
| COL | Colombia | 14376 | Candelaria         | 0.14 | 0.14 | 0.14 | 179407  | 179407  | 179407  |
| COL | Colombia | 14377 | Cartago            | 0.14 | 0.14 | 0.14 | 62212   | 62212   | 62212   |
| COL | Colombia | 14378 | Dagua              | 0.14 | 0.14 | 0.14 | 35182   | 35182   | 35182   |
| COL | Colombia | 14379 | El Aguila          | 0.14 | 0.14 | 0.14 | 4543    | 4543    | 4543    |
| COL | Colombia | 14380 | El Cairo           | 0.14 | 0.14 | 0.14 | 1014    | 1014    | 1014    |
| COL | Colombia | 14381 | El Cerrito         | 0.14 | 0.14 | 0.14 | 48479   | 48479   | 48479   |
| COL | Colombia | 14382 | El Dovio           | 0.14 | 0.14 | 0.14 | 3164    | 3164    | 3164    |
| COL | Colombia | 14383 | Florida            | 0.14 | 0.14 | 0.14 | 48381   | 48381   | 48381   |
| COL | Colombia | 14384 | Ginebra            | 0.14 | 0.14 | 0.14 | 12732   | 12732   | 12732   |
| COL | Colombia | 14385 | Guacari            | 0.14 | 0.14 | 0.14 | 20858   | 20858   | 20858   |
| COL | Colombia | 14386 | Jamundi            | 0.14 | 0.14 | 0.14 | 125066  | 125066  | 125066  |
| COL | Colombia | 14387 | La Cumbre          | 0.14 | 0.14 | 0.14 | 5798    | 5798    | 5798    |
| COL | Colombia | 14388 | La Union           | 0.14 | 0.14 | 0.14 | 16551   | 16551   | 16551   |
| COL | Colombia | 14389 | La Victoria        | 0.14 | 0.14 | 0.14 | 16808   | 16808   | 16808   |
| COL | Colombia | 14391 | Obando             | 0.14 | 0.14 | 0.14 | 8751    | 8751    | 8751    |
| COL | Colombia | 14392 | Palmira            | 0.14 | 0.14 | 0.14 | 259249  | 259249  | 259249  |
| COL | Colombia | 14393 | Pradera            | 0.14 | 0.14 | 0.14 | 44604   | 44604   | 44604   |
| COL | Colombia | 14394 | Restrepo           | 0.14 | 0.14 | 0.14 | 7797    | 7797    | 7797    |
| COL | Colombia | 14395 | Riofrio            | 0.14 | 0.14 | 0.14 | 5950    | 5950    | 5950    |
| COL | Colombia | 14396 | Roldanillo         | 0.14 | 0.14 | 0.14 | 14636   | 14636   | 14636   |
| COL | Colombia | 14397 | San Pedro          | 0.14 | 0.14 | 0.14 | 19125   | 19125   | 19125   |

|     |          |       |                   |      |      |      |        |        |        |
|-----|----------|-------|-------------------|------|------|------|--------|--------|--------|
| COL | Colombia | 14398 | Sevilla           | 0.14 | 0.14 | 0.14 | 52744  | 52744  | 52744  |
| COL | Colombia | 14399 | Toro              | 0.14 | 0.14 | 0.14 | 8791   | 8791   | 8791   |
| COL | Colombia | 14400 | Trujillo          | 0.14 | 0.14 | 0.14 | 6581   | 6581   | 6581   |
| COL | Colombia | 14401 | Tulua             | 0.14 | 0.14 | 0.14 | 74149  | 74149  | 74149  |
| COL | Colombia | 14402 | Ulloa             | 0.14 | 0.14 | 0.14 | 17016  | 17016  | 17016  |
| COL | Colombia | 14403 | Versalles         | 0.14 | 0.14 | 0.14 | 4306   | 4306   | 4306   |
| COL | Colombia | 14404 | Vijes             | 0.14 | 0.14 | 0.14 | 16729  | 16729  | 16729  |
| COL | Colombia | 14405 | Yotoco            | 0.14 | 0.14 | 0.14 | 7889   | 7889   | 7889   |
| COL | Colombia | 14406 | Yumbo             | 0.14 | 0.14 | 0.14 | 84093  | 84093  | 84093  |
| COL | Colombia | 14407 | Zarzal            | 0.14 | 0.14 | 0.14 | 25943  | 25943  | 25943  |
| COL | Colombia | 14408 | Caruru            | 0.14 | 0.14 | 0.14 | 4401   | 4401   | 4401   |
| COL | Colombia | 14409 | Mitu              | 0.14 | 0.14 | 0.14 | 25486  | 25486  | 25486  |
| COL | Colombia | 14410 | Pacoa             | 0.14 | 0.14 | 0.14 | 6192   | 6192   | 6192   |
| COL | Colombia | 14411 | Papunahua         | 0.14 | 0.14 | 0.14 | 4462   | 4462   | 4462   |
| COL | Colombia | 14412 | Taraira           | 0.14 | 0.14 | 0.14 | 1196   | 1196   | 1196   |
| COL | Colombia | 14413 | Yavarate          | 0.14 | 0.14 | 0.14 | 1822   | 1822   | 1822   |
| COL | Colombia | 14414 | Cumaribo          | 0.14 | 0.14 | 0.14 | 7983   | 7983   | 7983   |
| COL | Colombia | 14415 | La Primavera      | 0.14 | 0.14 | 0.14 | 10983  | 10983  | 10983  |
| COL | Colombia | 14416 | Puerto Carreno    | 0.14 | 0.14 | 0.14 | 9044   | 9044   | 9044   |
| COL | Colombia | 14417 | San Jose De Ocune | 0.14 | 0.14 | 0.14 | 10291  | 10291  | 10291  |
| COL | Colombia | 14418 | Santa Rita        | 0.14 | 0.14 | 0.14 | 7834   | 7834   | 7834   |
| COL | Colombia | 14419 | Santa Rosalia     | 0.14 | 0.14 | 0.14 | 2725   | 2725   | 2725   |
| ECU | Ecuador  | 15320 | Chordeleg         | 0.26 | 0.26 | 0.26 | 7107   | 7107   | 7107   |
| ECU | Ecuador  | 15321 | Cuenca            | 0.26 | 0.26 | 0.26 | 301368 | 301368 | 301368 |
| ECU | Ecuador  | 15322 | El Pan            | 0.26 | 0.26 | 0.26 | 2956   | 2956   | 2956   |
| ECU | Ecuador  | 15323 | Giron             | 0.26 | 0.26 | 0.26 | 7858   | 7858   | 7858   |
| ECU | Ecuador  | 15324 | Gualaceo          | 0.26 | 0.26 | 0.26 | 27508  | 27508  | 27508  |
| ECU | Ecuador  | 15325 | Nabon             | 0.26 | 0.26 | 0.26 | 8636   | 8636   | 8636   |
| ECU | Ecuador  | 15326 | Ona               | 0.26 | 0.26 | 0.26 | 2048   | 2048   | 2048   |
| ECU | Ecuador  | 15327 | Paute             | 0.26 | 0.26 | 0.26 | 21638  | 21638  | 21638  |
| ECU | Ecuador  | 15328 | Pucara            | 0.26 | 0.26 | 0.26 | 15960  | 15960  | 15960  |
| ECU | Ecuador  | 15329 | San Fernando      | 0.26 | 0.26 | 0.26 | 2424   | 2424   | 2424   |
| ECU | Ecuador  | 15330 | Santa Isabel      | 0.26 | 0.26 | 0.26 | 11876  | 11876  | 11876  |

|     |         |       |                |      |      |      |        |        |        |
|-----|---------|-------|----------------|------|------|------|--------|--------|--------|
| ECU | Ecuador | 15331 | Sevilla De Oro | 0.26 | 0.26 | 0.26 | 4207   | 4207   | 4207   |
| ECU | Ecuador | 15332 | Sissig         | 0.26 | 0.26 | 0.26 | 14636  | 14636  | 14636  |
| ECU | Ecuador | 15333 | Caluma         | 0.26 | 0.26 | 0.26 | 7408   | 7408   | 7408   |
| ECU | Ecuador | 15334 | Chillanes      | 0.26 | 0.26 | 0.26 | 9677   | 9677   | 9677   |
| ECU | Ecuador | 15335 | Chimbo         | 0.26 | 0.26 | 0.26 | 9184   | 9184   | 9184   |
| ECU | Ecuador | 15336 | Echeandia      | 0.26 | 0.26 | 0.26 | 6997   | 6997   | 6997   |
| ECU | Ecuador | 15337 | Guaranda       | 0.26 | 0.26 | 0.26 | 54751  | 54751  | 54751  |
| ECU | Ecuador | 15338 | Las Naves      | 0.26 | 0.26 | 0.26 | 3452   | 3452   | 3452   |
| ECU | Ecuador | 15339 | San Miguel     | 0.26 | 0.26 | 0.26 | 15191  | 15191  | 15191  |
| ECU | Ecuador | 15340 | Azogues        | 0.26 | 0.26 | 0.26 | 38457  | 38457  | 38457  |
| ECU | Ecuador | 15341 | Biblian        | 0.26 | 0.26 | 0.26 | 11922  | 11922  | 11922  |
| ECU | Ecuador | 15342 | Canar          | 0.26 | 0.26 | 0.26 | 40749  | 40749  | 40749  |
| ECU | Ecuador | 15343 | Deleg          | 0.26 | 0.26 | 0.26 | 3692   | 3692   | 3692   |
| ECU | Ecuador | 15344 | El Tambo       | 0.26 | 0.26 | 0.26 | 4103   | 4103   | 4103   |
| ECU | Ecuador | 15345 | La Troncal     | 0.26 | 0.26 | 0.26 | 30669  | 30669  | 30669  |
| ECU | Ecuador | 15346 | Bolivar        | 0.26 | 0.26 | 0.26 | 8327   | 8327   | 8327   |
| ECU | Ecuador | 15347 | Espejo         | 0.26 | 0.26 | 0.26 | 7662   | 7662   | 7662   |
| ECU | Ecuador | 15348 | Mira           | 0.26 | 0.26 | 0.26 | 6817   | 6817   | 6817   |
| ECU | Ecuador | 15349 | Montufar       | 0.26 | 0.26 | 0.26 | 18144  | 18144  | 18144  |
| ECU | Ecuador | 15350 | Tulcan         | 0.26 | 0.26 | 0.26 | 52631  | 52631  | 52631  |
| ECU | Ecuador | 15351 | Alausi         | 0.26 | 0.26 | 0.26 | 25719  | 25719  | 25719  |
| ECU | Ecuador | 15352 | Chambo         | 0.26 | 0.26 | 0.26 | 7108   | 7108   | 7108   |
| ECU | Ecuador | 15353 | Chunchi        | 0.26 | 0.26 | 0.26 | 8163   | 8163   | 8163   |
| ECU | Ecuador | 15354 | Colta          | 0.26 | 0.26 | 0.26 | 26803  | 26803  | 26803  |
| ECU | Ecuador | 15355 | Cumanda        | 0.26 | 0.26 | 0.26 | 6950   | 6950   | 6950   |
| ECU | Ecuador | 15356 | Guamote        | 0.26 | 0.26 | 0.26 | 25512  | 25512  | 25512  |
| ECU | Ecuador | 15357 | Guano          | 0.26 | 0.26 | 0.26 | 34455  | 34455  | 34455  |
| ECU | Ecuador | 15358 | Pallatanga     | 0.26 | 0.26 | 0.26 | 6447   | 6447   | 6447   |
| ECU | Ecuador | 15359 | Penipe         | 0.26 | 0.26 | 0.26 | 3852   | 3852   | 3852   |
| ECU | Ecuador | 15360 | Riobamba       | 0.26 | 0.26 | 0.26 | 127162 | 127162 | 127162 |
| ECU | Ecuador | 15361 | La Mana        | 0.26 | 0.26 | 0.26 | 20217  | 20217  | 20217  |
| ECU | Ecuador | 15362 | Latacunga      | 0.26 | 0.26 | 0.26 | 94018  | 94018  | 94018  |
| ECU | Ecuador | 15363 | Pangua         | 0.26 | 0.26 | 0.26 | 13421  | 13421  | 13421  |

|     |         |       |                   |      |      |      |        |        |        |
|-----|---------|-------|-------------------|------|------|------|--------|--------|--------|
| ECU | Ecuador | 15364 | Pujili            | 0.26 | 0.26 | 0.26 | 48788  | 48788  | 48788  |
| ECU | Ecuador | 15365 | Salcedo           | 0.26 | 0.26 | 0.26 | 37123  | 37123  | 37123  |
| ECU | Ecuador | 15366 | Saquisili         | 0.26 | 0.26 | 0.26 | 16520  | 16520  | 16520  |
| ECU | Ecuador | 15367 | Sigchos           | 0.26 | 0.26 | 0.26 | 13078  | 13078  | 13078  |
| ECU | Ecuador | 15368 | Arenillas         | 0.26 | 0.26 | 0.26 | 22311  | 22311  | 22311  |
| ECU | Ecuador | 15369 | Atahualpa         | 0.26 | 0.26 | 0.26 | 4990   | 4990   | 4990   |
| ECU | Ecuador | 15370 | Balsas            | 0.26 | 0.26 | 0.26 | 3131   | 3131   | 3131   |
| ECU | Ecuador | 15371 | Chilla            | 0.26 | 0.26 | 0.26 | 3443   | 3443   | 3443   |
| ECU | Ecuador | 15372 | El Guabo          | 0.26 | 0.26 | 0.26 | 28178  | 28178  | 28178  |
| ECU | Ecuador | 15373 | Huaquillas        | 0.26 | 0.26 | 0.26 | 23524  | 23524  | 23524  |
| ECU | Ecuador | 15374 | Isla Correa       | 0.26 | 0.26 | 0.26 | 12     | 12     | 12     |
| ECU | Ecuador | 15375 | Las Lajas         | 0.26 | 0.26 | 0.26 | 3246   | 3246   | 3246   |
| ECU | Ecuador | 15376 | Machala           | 0.26 | 0.26 | 0.26 | 137073 | 137073 | 137073 |
| ECU | Ecuador | 15377 | Marcabeli         | 0.26 | 0.26 | 0.26 | 3291   | 3291   | 3291   |
| ECU | Ecuador | 15379 | Pasaje            | 0.26 | 0.26 | 0.26 | 46398  | 46398  | 46398  |
| ECU | Ecuador | 15380 | Pinas             | 0.26 | 0.26 | 0.26 | 15849  | 15849  | 15849  |
| ECU | Ecuador | 15381 | Portovelo         | 0.26 | 0.26 | 0.26 | 5953   | 5953   | 5953   |
| ECU | Ecuador | 15382 | Santa Rosa        | 0.26 | 0.26 | 0.26 | 41159  | 41159  | 41159  |
| ECU | Ecuador | 15383 | Zaruma            | 0.26 | 0.26 | 0.26 | 14312  | 14312  | 14312  |
| ECU | Ecuador | 15384 | Atacames          | 0.26 | 0.26 | 0.26 | 23473  | 23473  | 23473  |
| ECU | Ecuador | 15385 | Eloy Alfaro       | 0.26 | 0.26 | 0.26 | 20627  | 20627  | 20627  |
| ECU | Ecuador | 15386 | Isla Luis Vargas  | 0.26 | 0.26 | 0.26 | 128480 | 128480 | 128480 |
| ECU | Ecuador | 15387 | La Isla (munisme  | 0.26 | 0.26 | 0.26 | 64     | 64     | 64     |
| ECU | Ecuador | 15388 | Muisne            | 0.26 | 0.26 | 0.26 | 17188  | 17188  | 17188  |
| ECU | Ecuador | 15389 | Quininde          | 0.26 | 0.26 | 0.26 | 63717  | 63717  | 63717  |
| ECU | Ecuador | 15390 | San Lorenzo       | 0.26 | 0.26 | 0.26 | 28966  | 28966  | 28966  |
| ECU | Ecuador | 15391 | San Lorenzo (is)  | 0.26 | 0.26 | 0.26 | 1286   | 1286   | 1286   |
| ECU | Ecuador | 15414 | Alfredo Baqueriz  | 0.26 | 0.26 | 0.26 | 22700  | 22700  | 22700  |
| ECU | Ecuador | 15415 | Balao             | 0.26 | 0.26 | 0.26 | 13145  | 13145  | 13145  |
| ECU | Ecuador | 15416 | Balzar            | 0.26 | 0.26 | 0.26 | 33348  | 33348  | 33348  |
| ECU | Ecuador | 15417 | Colimes           | 0.26 | 0.26 | 0.26 | 14925  | 14925  | 14925  |
| ECU | Ecuador | 15418 | Coronel Marcellin | 0.26 | 0.26 | 0.26 | 10092  | 10092  | 10092  |
| ECU | Ecuador | 15419 | Daule             | 0.26 | 0.26 | 0.26 | 74168  | 74168  | 74168  |

|     |         |       |                  |      |      |      |         |         |         |
|-----|---------|-------|------------------|------|------|------|---------|---------|---------|
| ECU | Ecuador | 15420 | Duran            | 0.26 | 0.26 | 0.26 | 128791  | 128791  | 128791  |
| ECU | Ecuador | 15421 | El Empalme       | 0.26 | 0.26 | 0.26 | 58684   | 58684   | 58684   |
| ECU | Ecuador | 15422 | El Triunfo       | 0.26 | 0.26 | 0.26 | 26823   | 26823   | 26823   |
| ECU | Ecuador | 15423 | Guayaquil        | 0.26 | 0.26 | 0.26 | 1382043 | 1382043 | 1382043 |
| ECU | Ecuador | 15424 | La Libertad      | 0.26 | 0.26 | 0.26 | 44483   | 44483   | 44483   |
| ECU | Ecuador | 15425 | Lomas De Sargent | 0.26 | 0.26 | 0.26 | 16589   | 16589   | 16589   |
| ECU | Ecuador | 15426 | Milagro          | 0.26 | 0.26 | 0.26 | 101466  | 101466  | 101466  |
| ECU | Ecuador | 15427 | Naranjal         | 0.26 | 0.26 | 0.26 | 60645   | 60645   | 60645   |
| ECU | Ecuador | 15428 | Naranjito        | 0.26 | 0.26 | 0.26 | 21656   | 21656   | 21656   |
| ECU | Ecuador | 15429 | Nobol            | 0.26 | 0.26 | 0.26 | 12249   | 12249   | 12249   |
| ECU | Ecuador | 15430 | Palestina        | 0.26 | 0.26 | 0.26 | 9441    | 9441    | 9441    |
| ECU | Ecuador | 15431 | Pedro Carbo      | 0.26 | 0.26 | 0.26 | 24927   | 24927   | 24927   |
| ECU | Ecuador | 15432 | Playas           | 0.26 | 0.26 | 0.26 | 31704   | 31704   | 31704   |
| ECU | Ecuador | 15433 | Salinas          | 0.26 | 0.26 | 0.26 | 56367   | 56367   | 56367   |
| ECU | Ecuador | 15434 | Samborondon      | 0.26 | 0.26 | 0.26 | 39954   | 39954   | 39954   |
| ECU | Ecuador | 15435 | Santa Elena      | 0.26 | 0.26 | 0.26 | 99615   | 99615   | 99615   |
| ECU | Ecuador | 15436 | Santa Lucia      | 0.26 | 0.26 | 0.26 | 19407   | 19407   | 19407   |
| ECU | Ecuador | 15437 | Simon Bolivar    | 0.26 | 0.26 | 0.26 | 15429   | 15429   | 15429   |
| ECU | Ecuador | 15438 | Urbina Jado      | 0.26 | 0.26 | 0.26 | 31773   | 31773   | 31773   |
| ECU | Ecuador | 15439 | Yaguachi         | 0.26 | 0.26 | 0.26 | 47866   | 47866   | 47866   |
| ECU | Ecuador | 15440 | Antonio Ante     | 0.26 | 0.26 | 0.26 | 26854   | 26854   | 26854   |
| ECU | Ecuador | 15441 | Cotacachi        | 0.26 | 0.26 | 0.26 | 24433   | 24433   | 24433   |
| ECU | Ecuador | 15442 | Ibarra           | 0.26 | 0.26 | 0.26 | 104112  | 104112  | 104112  |
| ECU | Ecuador | 15443 | Otavalo          | 0.26 | 0.26 | 0.26 | 61234   | 61234   | 61234   |
| ECU | Ecuador | 15444 | Pimampiro        | 0.26 | 0.26 | 0.26 | 6653    | 6653    | 6653    |
| ECU | Ecuador | 15445 | San Miguel Urcuq | 0.26 | 0.26 | 0.26 | 11779   | 11779   | 11779   |
| ECU | Ecuador | 15446 | Calvas           | 0.26 | 0.26 | 0.26 | 16690   | 16690   | 16690   |
| ECU | Ecuador | 15447 | Catamayo         | 0.26 | 0.26 | 0.26 | 21227   | 21227   | 21227   |
| ECU | Ecuador | 15448 | Celica           | 0.26 | 0.26 | 0.26 | 8568    | 8568    | 8568    |
| ECU | Ecuador | 15449 | Chaguarpamba     | 0.26 | 0.26 | 0.26 | 4750    | 4750    | 4750    |
| ECU | Ecuador | 15450 | Espindola        | 0.26 | 0.26 | 0.26 | 8234    | 8234    | 8234    |
| ECU | Ecuador | 15451 | Gonzanama        | 0.26 | 0.26 | 0.26 | 7899    | 7899    | 7899    |
| ECU | Ecuador | 15452 | Loja             | 0.26 | 0.26 | 0.26 | 122352  | 122352  | 122352  |

|     |         |       |                |      |      |      |        |        |        |
|-----|---------|-------|----------------|------|------|------|--------|--------|--------|
| ECU | Ecuador | 15453 | Macara         | 0.26 | 0.26 | 0.26 | 10887  | 10887  | 10887  |
| ECU | Ecuador | 15454 | Paltas         | 0.26 | 0.26 | 0.26 | 17295  | 17295  | 17295  |
| ECU | Ecuador | 15455 | Pindal         | 0.26 | 0.26 | 0.26 | 4889   | 4889   | 4889   |
| ECU | Ecuador | 15456 | Puyango        | 0.26 | 0.26 | 0.26 | 8735   | 8735   | 8735   |
| ECU | Ecuador | 15457 | Quilanga       | 0.26 | 0.26 | 0.26 | 2565   | 2565   | 2565   |
| ECU | Ecuador | 15458 | Saraguro       | 0.26 | 0.26 | 0.26 | 15398  | 15398  | 15398  |
| ECU | Ecuador | 15459 | Sozoranga      | 0.26 | 0.26 | 0.26 | 4358   | 4358   | 4358   |
| ECU | Ecuador | 15460 | Zapotillo      | 0.26 | 0.26 | 0.26 | 7260   | 7260   | 7260   |
| ECU | Ecuador | 15461 | Baba           | 0.26 | 0.26 | 0.26 | 24154  | 24154  | 24154  |
| ECU | Ecuador | 15462 | Babahoyo       | 0.26 | 0.26 | 0.26 | 83985  | 83985  | 83985  |
| ECU | Ecuador | 15463 | Buena Fe       | 0.26 | 0.26 | 0.26 | 35918  | 35918  | 35918  |
| ECU | Ecuador | 15464 | Montalvo       | 0.26 | 0.26 | 0.26 | 14651  | 14651  | 14651  |
| ECU | Ecuador | 15465 | Palenque       | 0.26 | 0.26 | 0.26 | 13213  | 13213  | 13213  |
| ECU | Ecuador | 15466 | Puebloviejo    | 0.26 | 0.26 | 0.26 | 22614  | 22614  | 22614  |
| ECU | Ecuador | 15467 | Quevedo        | 0.26 | 0.26 | 0.26 | 141323 | 141323 | 141323 |
| ECU | Ecuador | 15468 | Urdaneta       | 0.26 | 0.26 | 0.26 | 20690  | 20690  | 20690  |
| ECU | Ecuador | 15469 | Ventanas       | 0.26 | 0.26 | 0.26 | 51228  | 51228  | 51228  |
| ECU | Ecuador | 15470 | Vinces         | 0.26 | 0.26 | 0.26 | 41621  | 41621  | 41621  |
| ECU | Ecuador | 15471 | 24 De Mayo     | 0.26 | 0.26 | 0.26 | 17144  | 17144  | 17144  |
| ECU | Ecuador | 15472 | Bolivar        | 0.26 | 0.26 | 0.26 | 23615  | 23615  | 23615  |
| ECU | Ecuador | 15473 | Chone          | 0.26 | 0.26 | 0.26 | 74698  | 74698  | 74698  |
| ECU | Ecuador | 15474 | El Carmen      | 0.26 | 0.26 | 0.26 | 53064  | 53064  | 53064  |
| ECU | Ecuador | 15475 | Flavio Alfaro  | 0.26 | 0.26 | 0.26 | 15043  | 15043  | 15043  |
| ECU | Ecuador | 15476 | Isla Del Medio | 0.26 | 0.26 | 0.26 | 33175  | 33175  | 33175  |
| ECU | Ecuador | 15477 | Jipijapa       | 0.26 | 0.26 | 0.26 | 55247  | 55247  | 55247  |
| ECU | Ecuador | 15478 | Junin          | 0.26 | 0.26 | 0.26 | 11721  | 11721  | 11721  |
| ECU | Ecuador | 15479 | Manta          | 0.26 | 0.26 | 0.26 | 131466 | 131466 | 131466 |
| ECU | Ecuador | 15480 | Montecristi    | 0.26 | 0.26 | 0.26 | 58048  | 58048  | 58048  |
| ECU | Ecuador | 15481 | Pajan          | 0.26 | 0.26 | 0.26 | 22541  | 22541  | 22541  |
| ECU | Ecuador | 15482 | Pichincha      | 0.26 | 0.26 | 0.26 | 19191  | 19191  | 19191  |
| ECU | Ecuador | 15483 | Portoviejo     | 0.26 | 0.26 | 0.26 | 153811 | 153811 | 153811 |
| ECU | Ecuador | 15484 | Rocafuerte     | 0.26 | 0.26 | 0.26 | 24985  | 24985  | 24985  |
| ECU | Ecuador | 15485 | Santa Ana      | 0.26 | 0.26 | 0.26 | 38447  | 38447  | 38447  |

|     |         |       |                  |      |      |      |         |         |         |
|-----|---------|-------|------------------|------|------|------|---------|---------|---------|
| ECU | Ecuador | 15486 | Sucre            | 0.26 | 0.26 | 0.26 | 60250   | 60250   | 60250   |
| ECU | Ecuador | 15487 | Tosagua          | 0.26 | 0.26 | 0.26 | 21848   | 21848   | 21848   |
| ECU | Ecuador | 15488 | Gualaquiza       | 0.26 | 0.26 | 0.26 | 10572   | 10572   | 10572   |
| ECU | Ecuador | 15489 | Huamboya         | 0.26 | 0.26 | 0.26 | 6734    | 6734    | 6734    |
| ECU | Ecuador | 15490 | Limon Indanza    | 0.26 | 0.26 | 0.26 | 7900    | 7900    | 7900    |
| ECU | Ecuador | 15491 | Morona           | 0.26 | 0.26 | 0.26 | 42791   | 42791   | 42791   |
| ECU | Ecuador | 15492 | Palora           | 0.26 | 0.26 | 0.26 | 4369    | 4369    | 4369    |
| ECU | Ecuador | 15493 | San Juan Bosco   | 0.26 | 0.26 | 0.26 | 3360    | 3360    | 3360    |
| ECU | Ecuador | 15494 | Santiago         | 0.26 | 0.26 | 0.26 | 8842    | 8842    | 8842    |
| ECU | Ecuador | 15495 | Sucua            | 0.26 | 0.26 | 0.26 | 11294   | 11294   | 11294   |
| ECU | Ecuador | 15496 | Zamora           | 0.26 | 0.26 | 0.26 | 19490   | 19490   | 19490   |
| ECU | Ecuador | 15497 | Archidona        | 0.55 | 0.55 | 0.55 | 7850    | 7850    | 7850    |
| ECU | Ecuador | 15498 | El Chaco         | 0.55 | 0.55 | 0.55 | 2940    | 2940    | 2940    |
| ECU | Ecuador | 15499 | Quijos           | 0.55 | 0.55 | 0.55 | 2034    | 2034    | 2034    |
| ECU | Ecuador | 15500 | Tena             | 0.55 | 0.55 | 0.55 | 22059   | 22059   | 22059   |
| ECU | Ecuador | 15501 | Aguarico         | 0.26 | 0.26 | 0.26 | 3536    | 3536    | 3536    |
| ECU | Ecuador | 15502 | La Joya De Los S | 0.26 | 0.26 | 0.26 | 32780   | 32780   | 32780   |
| ECU | Ecuador | 15503 | Loreto           | 0.26 | 0.26 | 0.26 | 14476   | 14476   | 14476   |
| ECU | Ecuador | 15504 | Orellana         | 0.26 | 0.26 | 0.26 | 40695   | 40695   | 40695   |
| ECU | Ecuador | 15505 | Mera             | 0.26 | 0.26 | 0.26 | 8750    | 8750    | 8750    |
| ECU | Ecuador | 15506 | Pastaza          | 0.26 | 0.26 | 0.26 | 46114   | 46114   | 46114   |
| ECU | Ecuador | 15507 | Santa Clara      | 0.26 | 0.26 | 0.26 | 2386    | 2386    | 2386    |
| ECU | Ecuador | 15508 | Cayambe          | 0.26 | 0.26 | 0.26 | 52323   | 52323   | 52323   |
| ECU | Ecuador | 15509 | Mejia            | 0.26 | 0.26 | 0.26 | 64635   | 64635   | 64635   |
| ECU | Ecuador | 15510 | Pedro Moncayo    | 0.26 | 0.26 | 0.26 | 22396   | 22396   | 22396   |
| ECU | Ecuador | 15511 | Pedro Vicente M. | 0.26 | 0.26 | 0.26 | 8219    | 8219    | 8219    |
| ECU | Ecuador | 15512 | Quito            | 0.26 | 0.26 | 0.26 | 1364683 | 1364683 | 1364683 |
| ECU | Ecuador | 15513 | Ruminahui        | 0.26 | 0.26 | 0.26 | 54310   | 54310   | 54310   |
| ECU | Ecuador | 15514 | Santo Domingo    | 0.26 | 0.26 | 0.26 | 225762  | 225762  | 225762  |
| ECU | Ecuador | 15515 | Sn Miguel Bancos | 0.26 | 0.26 | 0.26 | 32932   | 32932   | 32932   |
| ECU | Ecuador | 15516 | Cascales         | 0.26 | 0.26 | 0.26 | 7160    | 7160    | 7160    |
| ECU | Ecuador | 15517 | Gonzalo Pizarro  | 0.26 | 0.26 | 0.26 | 5752    | 5752    | 5752    |
| ECU | Ecuador | 15518 | Lago Agrio       | 0.26 | 0.26 | 0.26 | 69590   | 69590   | 69590   |



|     |         |       |                  |      |      |      |        |        |        |
|-----|---------|-------|------------------|------|------|------|--------|--------|--------|
| ECU | Ecuador | 15519 | Putumayo         | 0.26 | 0.26 | 0.26 | 7634   | 7634   | 7634   |
| ECU | Ecuador | 15520 | Shushufindi      | 0.26 | 0.26 | 0.26 | 25108  | 25108  | 25108  |
| ECU | Ecuador | 15521 | Sucumbios        | 0.26 | 0.26 | 0.26 | 3489   | 3489   | 3489   |
| ECU | Ecuador | 15522 | Ambato           | 0.26 | 0.26 | 0.26 | 194507 | 194507 | 194507 |
| ECU | Ecuador | 15523 | Banos            | 0.26 | 0.26 | 0.26 | 10110  | 10110  | 10110  |
| ECU | Ecuador | 15524 | Cevallos         | 0.26 | 0.26 | 0.26 | 4472   | 4472   | 4472   |
| ECU | Ecuador | 15525 | Mocha            | 0.26 | 0.26 | 0.26 | 3901   | 3901   | 3901   |
| ECU | Ecuador | 15526 | Patate           | 0.26 | 0.26 | 0.26 | 8094   | 8094   | 8094   |
| ECU | Ecuador | 15527 | Quero            | 0.26 | 0.26 | 0.26 | 10769  | 10769  | 10769  |
| ECU | Ecuador | 15528 | Santiago Pillaro | 0.26 | 0.26 | 0.26 | 24592  | 24592  | 24592  |
| ECU | Ecuador | 15529 | Sn Pedro Pelileo | 0.26 | 0.26 | 0.26 | 35156  | 35156  | 35156  |
| ECU | Ecuador | 15530 | Tisaleo          | 0.26 | 0.26 | 0.26 | 7656   | 7656   | 7656   |
| ECU | Ecuador | 15531 | Chinchipe        | 0.26 | 0.26 | 0.26 | 11844  | 11844  | 11844  |
| ECU | Ecuador | 15532 | El Pangui        | 0.26 | 0.26 | 0.26 | 5527   | 5527   | 5527   |
| ECU | Ecuador | 15533 | Nangaritza       | 0.26 | 0.26 | 0.26 | 4394   | 4394   | 4394   |
| ECU | Ecuador | 15534 | Yacuambi         | 0.26 | 0.26 | 0.26 | 3901   | 3901   | 3901   |
| ECU | Ecuador | 15535 | Yantzaza         | 0.26 | 0.26 | 0.26 | 11381  | 11381  | 11381  |
| ECU | Ecuador | 15536 | El Piedrero      | 0.26 | 0.26 | 0.26 | 4497   | 4497   | 4497   |
| ECU | Ecuador | 15537 | La Concordia     | 0.26 | 0.26 | 0.26 | 34587  | 34587  | 34587  |
| ECU | Ecuador | 15538 | Las Golondrinas  | 0.26 | 0.26 | 0.26 | 2232   | 2232   | 2232   |
| ECU | Ecuador | 15539 | Manga De Cura    | 0.26 | 0.26 | 0.26 | 14417  | 14417  | 14417  |
| ERI | Eritrea | 15835 | Adi Tekeliezan   | 0.00 | 0.00 | 0.00 | 77428  | 77428  | 77428  |
| ERI | Eritrea | 15836 | Asmat            | 0.00 | 0.00 | 0.00 | 165835 | 165835 | 165835 |
| ERI | Eritrea | 15837 | Elabered         | 0.00 | 0.00 | 0.00 | 62225  | 62225  | 62225  |
| ERI | Eritrea | 15838 | Geleb            | 0.00 | 0.00 | 0.00 | 38202  | 38202  | 38202  |
| ERI | Eritrea | 15839 | Habero           | 0.00 | 0.00 | 0.00 | 61537  | 61537  | 61537  |
| ERI | Eritrea | 15840 | Hagaz            | 0.00 | 0.00 | 0.00 | 43885  | 43885  | 43885  |
| ERI | Eritrea | 15841 | Halhal           | 0.00 | 0.00 | 0.00 | 71752  | 71752  | 71752  |
| ERI | Eritrea | 15842 | Hamelmalo        | 0.00 | 0.00 | 0.00 | 45453  | 45453  | 45453  |
| ERI | Eritrea | 15843 | Keren            | 0.00 | 0.00 | 0.00 | 10520  | 10520  | 10520  |
| ERI | Eritrea | 15844 | Kerkebet         | 0.00 | 0.00 | 0.00 | 52966  | 52966  | 52966  |
| ERI | Eritrea | 15845 | Sel'a            | 0.00 | 0.00 | 0.00 | 99396  | 99396  | 99396  |
| ERI | Eritrea | 15847 | Adi Keih         | 0.00 | 0.00 | 0.00 | 70820  | 70820  | 70820  |

|     |         |       |                 |      |      |      |        |        |        |
|-----|---------|-------|-----------------|------|------|------|--------|--------|--------|
| ERI | Eritrea | 15848 | Adi Kuala       | 0.00 | 0.00 | 0.00 | 68011  | 68011  | 68011  |
| ERI | Eritrea | 15849 | Areza           | 0.00 | 0.00 | 0.00 | 125926 | 125926 | 125926 |
| ERI | Eritrea | 15850 | Dbarwa          | 0.00 | 0.00 | 0.00 | 384637 | 384637 | 384637 |
| ERI | Eritrea | 15851 | Dekemhare       | 0.00 | 0.00 | 0.00 | 233579 | 233579 | 233579 |
| ERI | Eritrea | 15852 | Emni Haili      | 0.00 | 0.00 | 0.00 | 25622  | 25622  | 25622  |
| ERI | Eritrea | 15853 | Mai Aini        | 0.00 | 0.00 | 0.00 | 54388  | 54388  | 54388  |
| ERI | Eritrea | 15854 | Mai Mne         | 0.00 | 0.00 | 0.00 | 90114  | 90114  | 90114  |
| ERI | Eritrea | 15855 | Mendefera       | 0.00 | 0.00 | 0.00 | 109804 | 109804 | 109804 |
| ERI | Eritrea | 15856 | Segeneiti       | 0.00 | 0.00 | 0.00 | 75902  | 75902  | 75902  |
| ERI | Eritrea | 15857 | Senafe          | 0.00 | 0.00 | 0.00 | 65836  | 65836  | 65836  |
| ERI | Eritrea | 15858 | Tsorona         | 0.00 | 0.00 | 0.00 | 43194  | 43194  | 43194  |
| ERI | Eritrea | 15863 | Akurdet         | 0.00 | 0.00 | 0.00 | 7118   | 7118   | 7118   |
| ERI | Eritrea | 15864 | Barentu         | 0.00 | 0.00 | 0.00 | 18569  | 18569  | 18569  |
| ERI | Eritrea | 15865 | Dge             | 0.00 | 0.00 | 0.00 | 46432  | 46432  | 46432  |
| ERI | Eritrea | 15866 | Forto           | 0.00 | 0.00 | 0.00 | 45235  | 45235  | 45235  |
| ERI | Eritrea | 15867 | Gonei           | 0.00 | 0.00 | 0.00 | 87934  | 87934  | 87934  |
| ERI | Eritrea | 15868 | Haikota         | 0.00 | 0.00 | 0.00 | 36153  | 36153  | 36153  |
| ERI | Eritrea | 15869 | La'elay Gash    | 0.00 | 0.00 | 0.00 | 107840 | 107840 | 107840 |
| ERI | Eritrea | 15870 | Logo Anseba     | 0.00 | 0.00 | 0.00 | 209186 | 209186 | 209186 |
| ERI | Eritrea | 15871 | Mensura         | 0.00 | 0.00 | 0.00 | 185072 | 185072 | 185072 |
| ERI | Eritrea | 15872 | Mogolo          | 0.00 | 0.00 | 0.00 | 51881  | 51881  | 51881  |
| ERI | Eritrea | 15873 | Molqi           | 0.00 | 0.00 | 0.00 | 282668 | 282668 | 282668 |
| ERI | Eritrea | 15874 | Omhajer         | 0.00 | 0.00 | 0.00 | 93601  | 93601  | 93601  |
| ERI | Eritrea | 15875 | Shambqo         | 0.00 | 0.00 | 0.00 | 80252  | 80252  | 80252  |
| ERI | Eritrea | 15876 | Tesseney        | 0.00 | 0.00 | 0.00 | 22258  | 22258  | 22258  |
| ERI | Eritrea | 15877 | Berik           | 0.00 | 0.00 | 0.00 | 130118 | 130118 | 130118 |
| ERI | Eritrea | 15878 | Gala Nefhi      | 0.00 | 0.00 | 0.00 | 185727 | 185727 | 185727 |
| ERI | Eritrea | 15879 | Northern Asmara | 0.00 | 0.00 | 0.00 | 7013   | 7013   | 7013   |
| ERI | Eritrea | 15880 | Northern Merab  | 0.00 | 0.00 | 0.00 | 18565  | 18565  | 18565  |
| ERI | Eritrea | 15881 | Serejeqa        | 0.00 | 0.00 | 0.00 | 129419 | 129419 | 129419 |
| ERI | Eritrea | 15882 | Southern Asmara | 0.00 | 0.00 | 0.00 | 17645  | 17645  | 17645  |
| ERI | Eritrea | 15883 | Southern Merab  | 0.00 | 0.00 | 0.00 | 28656  | 28656  | 28656  |
| ERI | Eritrea | 15884 | Adobhe          | 0.00 | 0.00 | 0.00 | 81512  | 81512  | 81512  |

|     |          |       |                          |      |      |      |         |         |         |
|-----|----------|-------|--------------------------|------|------|------|---------|---------|---------|
| ERI | Eritrea  | 15885 | Afabet                   | 0.00 | 0.00 | 0.00 | 288763  | 288763  | 288763  |
| ERI | Eritrea  | 15886 | Foro                     | 0.00 | 0.00 | 0.00 | 220950  | 220950  | 220950  |
| ERI | Eritrea  | 15887 | Gel'alo                  | 0.00 | 0.00 | 0.00 | 158377  | 158377  | 158377  |
| ERI | Eritrea  | 15888 | Gindae                   | 0.00 | 0.00 | 0.00 | 237372  | 237372  | 237372  |
| ERI | Eritrea  | 15889 | Massawa                  | 0.00 | 0.00 | 0.00 | 17068   | 17068   | 17068   |
| ERI | Eritrea  | 15890 | Nakfa                    | 0.00 | 0.00 | 0.00 | 89671   | 89671   | 89671   |
| ERI | Eritrea  | 15891 | Quarura                  | 0.00 | 0.00 | 0.00 | 217159  | 217159  | 217159  |
| ERI | Eritrea  | 15892 | Sheb                     | 0.00 | 0.00 | 0.00 | 118466  | 118466  | 118466  |
| ETH | Ethiopia | 40782 | Addis Ababa Zone1        | 0.00 | 0.00 | 0.00 | 451004  | 451004  | 451004  |
| ETH | Ethiopia | 40783 | Addis Ababa Zone2        | 0.00 | 0.00 | 0.00 | 713512  | 713512  | 713512  |
| ETH | Ethiopia | 40784 | Addis Ababa Zone3        | 0.00 | 0.00 | 0.00 | 639391  | 639391  | 639391  |
| ETH | Ethiopia | 40785 | Addis Ababa Zone4        | 0.00 | 0.00 | 0.00 | 834745  | 834745  | 834745  |
| ETH | Ethiopia | 40786 | Addis Ababa Zone5        | 0.00 | 0.00 | 0.00 | 781055  | 781055  | 781055  |
| ETH | Ethiopia | 40788 | Afar Zone 1              | 0.00 | 0.00 | 0.00 | 468686  | 468686  | 468686  |
| ETH | Ethiopia | 40789 | Afar Zone 2              | 0.00 | 0.00 | 0.00 | 305418  | 305418  | 305418  |
| ETH | Ethiopia | 40790 | Afar Zone 4              | 0.00 | 0.00 | 0.00 | 177844  | 177844  | 177844  |
| ETH | Ethiopia | 40791 | Afar Zone 5              | 0.00 | 0.00 | 0.00 | 388093  | 388093  | 388093  |
| ETH | Ethiopia | 40792 | Afar Zone 3              | 0.00 | 0.00 | 0.00 | 222726  | 222726  | 222726  |
| ETH | Ethiopia | 40793 | Admin unit not available | 0.00 | 0.00 | 0.00 | 32854   | 32854   | 32854   |
| ETH | Ethiopia | 40794 | Awi                      | 0.00 | 0.00 | 0.00 | 1068991 | 1068991 | 1068991 |
| ETH | Ethiopia | 40796 | East Gojam               | 0.00 | 0.00 | 0.00 | 2569428 | 2569428 | 2569428 |
| ETH | Ethiopia | 40797 | North Gonder             | 0.00 | 0.00 | 0.00 | 3133196 | 3133196 | 3133196 |
| ETH | Ethiopia | 40799 | North Wollo              | 0.00 | 0.00 | 0.00 | 1875584 | 1875584 | 1875584 |
| ETH | Ethiopia | 40800 | Oromia Zone              | 0.00 | 0.00 | 0.00 | 699372  | 699372  | 699372  |
| ETH | Ethiopia | 40801 | South Gonder             | 0.00 | 0.00 | 0.00 | 2630872 | 2630872 | 2630872 |
| ETH | Ethiopia | 40802 | South Wollo              | 0.00 | 0.00 | 0.00 | 3187493 | 3187493 | 3187493 |
| ETH | Ethiopia | 40803 | Wag Hemira               | 0.00 | 0.00 | 0.00 | 409841  | 409841  | 409841  |
| ETH | Ethiopia | 40804 | West Gojam               | 0.00 | 0.00 | 0.00 | 2629300 | 2629300 | 2629300 |
| ETH | Ethiopia | 40805 | Asosa                    | 0.00 | 0.00 | 0.00 | 347878  | 347878  | 347878  |
| ETH | Ethiopia | 40807 | Metekel                  | 0.00 | 0.00 | 0.00 | 297352  | 297352  | 297352  |
| ETH | Ethiopia | 40809 | Dire Dawa                | 0.00 | 0.00 | 0.00 | 448875  | 448875  | 448875  |
| ETH | Ethiopia | 40814 | Harari                   | 0.00 | 0.00 | 0.00 | 219402  | 219402  | 219402  |
| ETH | Ethiopia | 40820 | East Wellega             | 0.00 | 0.00 | 0.00 | 1885361 | 1885361 | 1885361 |

|     |          |       |                        |      |      |      |         |         |         |
|-----|----------|-------|------------------------|------|------|------|---------|---------|---------|
| ETH | Ethiopia | 40821 | Illubabor              | 0.00 | 0.00 | 0.00 | 1278368 | 1278368 | 1278368 |
| ETH | Ethiopia | 40822 | Jimma                  | 0.00 | 0.00 | 0.00 | 2945777 | 2945777 | 2945777 |
| ETH | Ethiopia | 40824 | West Harerghe          | 0.00 | 0.00 | 0.00 | 1968588 | 1968588 | 1968588 |
| ETH | Ethiopia | 40826 | West Wellega           | 0.00 | 0.00 | 0.00 | 2294059 | 2294059 | 2294059 |
| ETH | Ethiopia | 40827 | Amaro Special Woreda   | 0.00 | 0.00 | 0.00 | 147352  | 147352  | 147352  |
| ETH | Ethiopia | 40829 | Burji Special Woreda   | 0.00 | 0.00 | 0.00 | 59364   | 59364   | 59364   |
| ETH | Ethiopia | 40830 | Derashe Special Woreda | 0.00 | 0.00 | 0.00 | 139245  | 139245  | 139245  |
| ETH | Ethiopia | 40831 | Gedeo                  | 0.00 | 0.00 | 0.00 | 858293  | 858293  | 858293  |
| ETH | Ethiopia | 40833 | Hadiya                 | 0.00 | 0.00 | 0.00 | 1604035 | 1604035 | 1604035 |
| ETH | Ethiopia | 40836 | Konso Special Woreda   | 0.00 | 0.00 | 0.00 | 235523  | 235523  | 235523  |
| ETH | Ethiopia | 40838 | Sidama                 | 0.00 | 0.00 | 0.00 | 3186409 | 3186409 | 3186409 |
| ETH | Ethiopia | 40839 | South Omo              | 0.37 | 0.47 | 0.54 | 267026  | 205069  | 163224  |
| ETH | Ethiopia | 40840 | Yem Special Woreda     | 0.00 | 0.00 | 0.00 | 99052   | 99052   | 99052   |
| ETH | Ethiopia | 40841 | Afder                  | 0.00 | 0.00 | 0.00 | 479247  | 479247  | 479247  |
| ETH | Ethiopia | 40842 | Deghabur               | 0.00 | 0.00 | 0.00 | 417325  | 417325  | 417325  |
| ETH | Ethiopia | 40844 | Gode                   | 0.00 | 0.00 | 0.00 | 444934  | 444934  | 444934  |
| ETH | Ethiopia | 40845 | Jijiga                 | 0.00 | 0.00 | 0.00 | 930441  | 930441  | 930441  |
| ETH | Ethiopia | 40848 | Shinile                | 0.00 | 0.00 | 0.00 | 434475  | 434475  | 434475  |
| ETH | Ethiopia | 40849 | Warder                 | 0.00 | 0.00 | 0.00 | 458265  | 458265  | 458265  |
| ETH | Ethiopia | 40850 | Central Tigray         | 0.00 | 0.00 | 0.00 | 1402618 | 1402618 | 1402618 |
| ETH | Ethiopia | 40851 | Easetern Tigray        | 0.00 | 0.00 | 0.00 | 866047  | 866047  | 866047  |
| ETH | Ethiopia | 40852 | Mekele                 | 0.00 | 0.00 | 0.00 | 174931  | 174931  | 174931  |
| ETH | Ethiopia | 40853 | Southern Tigray        | 0.00 | 0.00 | 0.00 | 1184690 | 1184690 | 1184690 |
| ETH | Ethiopia | 47680 | Addis Ababa Zone6      | 0.00 | 0.00 | 0.00 | 137937  | 137937  | 137937  |
| ETH | Ethiopia | 47681 | Bahir Dar Special Zone | 0.00 | 0.00 | 0.00 | 138607  | 138607  | 138607  |
| ETH | Ethiopia | 47682 | North Shewa (K3)       | 0.00 | 0.00 | 0.00 | 2328416 | 2328416 | 2328416 |
| ETH | Ethiopia | 47683 | Kemashi                | 0.00 | 0.00 | 0.00 | 110350  | 110350  | 110350  |
| ETH | Ethiopia | 47684 | Zone 1                 | 0.00 | 0.00 | 0.00 | 171886  | 171886  | 171886  |
| ETH | Ethiopia | 47685 | Zone 2                 | 0.00 | 0.00 | 0.00 | 100239  | 100239  | 100239  |
| ETH | Ethiopia | 47686 | Arsi                   | 0.00 | 0.00 | 0.00 | 3391333 | 3391333 | 3391333 |
| ETH | Ethiopia | 47687 | Bale                   | 0.00 | 0.00 | 0.00 | 1829828 | 1829828 | 1829828 |
| ETH | Ethiopia | 47688 | Borena                 | 0.00 | 0.00 | 0.00 | 843584  | 843584  | 843584  |
| ETH | Ethiopia | 47689 | East Harerghe          | 0.00 | 0.00 | 0.00 | 2871814 | 2871814 | 2871814 |

|     |          |       |                        |      |      |      |         |         |         |
|-----|----------|-------|------------------------|------|------|------|---------|---------|---------|
| ETH | Ethiopia | 47690 | East Shewa             | 0.00 | 0.00 | 0.00 | 2618483 | 2618483 | 2618483 |
| ETH | Ethiopia | 47691 | Guji                   | 0.00 | 0.00 | 0.00 | 1307193 | 1307193 | 1307193 |
| ETH | Ethiopia | 47692 | North Shewa (K4)       | 0.00 | 0.00 | 0.00 | 1748276 | 1748276 | 1748276 |
| ETH | Ethiopia | 47693 | South West Shewa       | 0.00 | 0.00 | 0.00 | 1234001 | 1234001 | 1234001 |
| ETH | Ethiopia | 47694 | West Shewa             | 0.00 | 0.00 | 0.00 | 2293278 | 2293278 | 2293278 |
| ETH | Ethiopia | 47695 | Alaba Special Wereda   | 0.00 | 0.00 | 0.00 | 290514  | 290514  | 290514  |
| ETH | Ethiopia | 47696 | Basketo Special Woreda | 0.00 | 0.00 | 0.00 | 50870   | 50870   | 50870   |
| ETH | Ethiopia | 47697 | Benchi Maji            | 0.00 | 0.00 | 0.00 | 496988  | 496988  | 496988  |
| ETH | Ethiopia | 47698 | Dawuro                 | 0.00 | 0.00 | 0.00 | 413564  | 413564  | 413564  |
| ETH | Ethiopia | 47699 | Gamo Gofa              | 0.00 | 0.00 | 0.00 | 1652442 | 1652442 | 1652442 |
| ETH | Ethiopia | 47700 | Guraghe                | 0.00 | 0.00 | 0.00 | 1770430 | 1770430 | 1770430 |
| ETH | Ethiopia | 47701 | Kaffa                  | 0.00 | 0.00 | 0.00 | 901310  | 901310  | 901310  |
| ETH | Ethiopia | 47702 | Kembata Alaba Tembaro  | 0.00 | 0.00 | 0.00 | 813783  | 813783  | 813783  |
| ETH | Ethiopia | 47703 | Konta Special Woreda   | 0.00 | 0.00 | 0.00 | 80686   | 80686   | 80686   |
| ETH | Ethiopia | 47704 | Shaka                  | 0.00 | 0.00 | 0.00 | 202220  | 202220  | 202220  |
| ETH | Ethiopia | 47705 | Siltie                 | 0.00 | 0.00 | 0.00 | 596581  | 596581  | 596581  |
| ETH | Ethiopia | 47706 | Wolayita               | 0.00 | 0.00 | 0.00 | 1763121 | 1763121 | 1763121 |
| ETH | Ethiopia | 47707 | Fiq                    | 0.00 | 0.00 | 0.00 | 346945  | 346945  | 346945  |
| ETH | Ethiopia | 47708 | Korahe(Kebri Dehar)    | 0.00 | 0.00 | 0.00 | 350646  | 350646  | 350646  |
| ETH | Ethiopia | 47709 | Liben                  | 0.00 | 0.00 | 0.00 | 687598  | 687598  | 687598  |
| ETH | Ethiopia | 47710 | North Western Tigray   | 0.00 | 0.00 | 0.00 | 780952  | 780952  | 780952  |
| ETH | Ethiopia | 47711 | Western Tigray         | 0.00 | 0.00 | 0.00 | 293499  | 293499  | 293499  |
| GAB | Gabon    | 16357 | Komo                   | 0.23 | 0.25 | 0.26 | 6925    | 6632    | 6481    |
| GAB | Gabon    | 16358 | Komo-Mondah            | 0.23 | 0.25 | 0.26 | 61010   | 58424   | 57095   |
| GAB | Gabon    | 16359 | Libreville             | 0.23 | 0.25 | 0.26 | 379373  | 363292  | 355028  |
| GAB | Gabon    | 16360 | Noya                   | 0.23 | 0.25 | 0.26 | 3369    | 3226    | 3152    |
| GAB | Gabon    | 16361 | Bayi-Brikolo           | 0.23 | 0.25 | 0.26 | 2515    | 2409    | 2354    |
| GAB | Gabon    | 16362 | Djoue                  | 0.23 | 0.25 | 0.26 | 1881    | 1801    | 1760    |
| GAB | Gabon    | 16363 | Djouori-Agnili         | 0.23 | 0.25 | 0.26 | 2372    | 2272    | 2220    |
| GAB | Gabon    | 16364 | Lebombi-Leyou          | 0.23 | 0.25 | 0.26 | 40110   | 38409   | 37536   |
| GAB | Gabon    | 16365 | Lekabi-Lewolo          | 0.23 | 0.25 | 0.26 | 3399    | 3255    | 3181    |
| GAB | Gabon    | 16366 | Lekoko                 | 0.23 | 0.25 | 0.26 | 1868    | 1788    | 1748    |
| GAB | Gabon    | 16367 | Lekoni-Lekori          | 0.23 | 0.25 | 0.26 | 4788    | 4585    | 4481    |

|     |       |       |                  |      |      |      |       |       |       |
|-----|-------|-------|------------------|------|------|------|-------|-------|-------|
| GAB | Gabon | 16368 | Ogooue-Letili    | 0.23 | 0.25 | 0.26 | 2460  | 2356  | 2303  |
| GAB | Gabon | 16369 | Passa            | 0.23 | 0.25 | 0.26 | 91699 | 87812 | 85815 |
| GAB | Gabon | 16370 | Plateaux         | 0.23 | 0.25 | 0.26 | 4816  | 4612  | 4507  |
| GAB | Gabon | 16371 | Sebe-Brikolo     | 0.23 | 0.25 | 0.26 | 6619  | 6339  | 6195  |
| GAB | Gabon | 16372 | Abanga-Bigne     | 0.23 | 0.25 | 0.26 | 7273  | 6965  | 6806  |
| GAB | Gabon | 16373 | Ogooue et Lacs   | 0.23 | 0.25 | 0.26 | 31690 | 30347 | 29657 |
| GAB | Gabon | 16374 | Boumi-Louetsi    | 0.23 | 0.25 | 0.26 | 12257 | 11738 | 11471 |
| GAB | Gabon | 16375 | Dola             | 0.23 | 0.25 | 0.26 | 4593  | 4398  | 4298  |
| GAB | Gabon | 16376 | Douya-Onoye      | 0.23 | 0.25 | 0.26 | 14227 | 13624 | 13314 |
| GAB | Gabon | 16377 | Louetsi-Bibaka   | 0.23 | 0.25 | 0.26 | 1979  | 1895  | 1852  |
| GAB | Gabon | 16378 | Louetsi-Wano     | 0.23 | 0.25 | 0.26 | 8368  | 8013  | 7831  |
| GAB | Gabon | 16379 | Mougalaba        | 0.23 | 0.25 | 0.26 | 1442  | 1381  | 1350  |
| GAB | Gabon | 16380 | Ndolou           | 0.23 | 0.25 | 0.26 | 3106  | 2974  | 2906  |
| GAB | Gabon | 16381 | Ogoulou          | 0.23 | 0.25 | 0.26 | 5460  | 5229  | 5110  |
| GAB | Gabon | 16382 | Tsamba-Magotsi   | 0.23 | 0.25 | 0.26 | 8656  | 8289  | 8100  |
| GAB | Gabon | 16383 | Basse-Banio      | 0.23 | 0.25 | 0.26 | 4999  | 4787  | 4678  |
| GAB | Gabon | 16384 | Douigni          | 0.23 | 0.25 | 0.26 | 3946  | 3779  | 3693  |
| GAB | Gabon | 16385 | Doutsila         | 0.23 | 0.25 | 0.26 | 2163  | 2071  | 2024  |
| GAB | Gabon | 16386 | Haute-Banio      | 0.23 | 0.25 | 0.26 | 991   | 949   | 927   |
| GAB | Gabon | 16387 | Mongo            | 0.23 | 0.25 | 0.26 | 2037  | 1950  | 1906  |
| GAB | Gabon | 16388 | Mougoutsi        | 0.23 | 0.25 | 0.26 | 14822 | 14193 | 13870 |
| GAB | Gabon | 16389 | Ivindo           | 0.23 | 0.25 | 0.26 | 18911 | 18110 | 17698 |
| GAB | Gabon | 16390 | Lope             | 0.23 | 0.25 | 0.26 | 9855  | 9437  | 9222  |
| GAB | Gabon | 16391 | Mvoung           | 0.23 | 0.25 | 0.26 | 3133  | 3000  | 2932  |
| GAB | Gabon | 16392 | Zadie            | 0.23 | 0.25 | 0.26 | 9467  | 9065  | 8859  |
| GAB | Gabon | 16393 | Lolo-Bouenguidi  | 0.23 | 0.25 | 0.26 | 19399 | 18577 | 18155 |
| GAB | Gabon | 16394 | Lombo-Bouenguidi | 0.23 | 0.25 | 0.26 | 2949  | 2824  | 2760  |
| GAB | Gabon | 16395 | Mouloundou       | 0.23 | 0.25 | 0.26 | 16440 | 15743 | 15385 |
| GAB | Gabon | 16396 | Offoue-Onoye     | 0.23 | 0.25 | 0.26 | 2957  | 2832  | 2768  |
| GAB | Gabon | 16397 | Bendje           | 0.23 | 0.25 | 0.26 | 87839 | 84115 | 82202 |
| GAB | Gabon | 16398 | Etimboue         | 0.23 | 0.25 | 0.26 | 3798  | 3637  | 3554  |
| GAB | Gabon | 16399 | Ndougou          | 0.23 | 0.25 | 0.26 | 5297  | 5073  | 4957  |
| GAB | Gabon | 16400 | Haut-Komo        | 0.23 | 0.25 | 0.26 | 3322  | 3181  | 3108  |

|     |       |       |                   |      |      |      |        |        |        |
|-----|-------|-------|-------------------|------|------|------|--------|--------|--------|
| GAB | Gabon | 16401 | Haut-Ntem         | 0.23 | 0.25 | 0.26 | 9128   | 8741   | 8542   |
| GAB | Gabon | 16402 | Ntem              | 0.23 | 0.25 | 0.26 | 26228  | 25116  | 24545  |
| GAB | Gabon | 16403 | Okano             | 0.23 | 0.25 | 0.26 | 9936   | 9514   | 9298   |
| GAB | Gabon | 16404 | Woleu             | 0.23 | 0.25 | 0.26 | 49006  | 46929  | 45861  |
| GHA | Ghana | 16564 | Adansi East       | 0.49 | 0.53 | 0.54 | 44895  | 40112  | 37786  |
| GHA | Ghana | 16565 | Adansi West       | 0.49 | 0.53 | 0.54 | 82707  | 73896  | 69611  |
| GHA | Ghana | 16566 | Afigya Sekyere    | 0.49 | 0.53 | 0.54 | 71162  | 63581  | 59894  |
| GHA | Ghana | 16567 | Ahafo Ano North   | 0.49 | 0.53 | 0.54 | 35133  | 31390  | 29570  |
| GHA | Ghana | 16568 | Ahafo Ano South   | 0.49 | 0.53 | 0.54 | 36160  | 32308  | 30434  |
| GHA | Ghana | 16569 | Amansie East      | 0.49 | 0.53 | 0.54 | 96160  | 85916  | 80934  |
| GHA | Ghana | 16570 | Amansie West      | 0.49 | 0.53 | 0.54 | 40020  | 35757  | 33683  |
| GHA | Ghana | 16571 | Asante Akim North | 0.49 | 0.53 | 0.54 | 51028  | 45592  | 42948  |
| GHA | Ghana | 16572 | Asante Akim South | 0.49 | 0.53 | 0.54 | 39346  | 35155  | 33116  |
| GHA | Ghana | 16573 | Atwima            | 0.49 | 0.53 | 0.54 | 101200 | 90419  | 85175  |
| GHA | Ghana | 16574 | Bosomtwi Kwanwoma | 0.49 | 0.53 | 0.54 | 126777 | 113272 | 106703 |
| GHA | Ghana | 16575 | Ejura-Sekyedumasi | 0.49 | 0.53 | 0.54 | 31855  | 28462  | 26811  |
| GHA | Ghana | 16576 | Ejusu/Juaben      | 0.49 | 0.53 | 0.54 | 66031  | 58997  | 55575  |
| GHA | Ghana | 16577 | Kumasi            | 0.49 | 0.53 | 0.54 | 661414 | 590953 | 556682 |
| GHA | Ghana | 16578 | Kwabere           | 0.49 | 0.53 | 0.54 | 57600  | 51464  | 48479  |
| GHA | Ghana | 16579 | Offinso           | 0.49 | 0.53 | 0.54 | 47100  | 42082  | 39642  |
| GHA | Ghana | 16580 | Sekyere East      | 0.49 | 0.53 | 0.54 | 49689  | 44396  | 41821  |
| GHA | Ghana | 16581 | Sekyere West      | 0.49 | 0.53 | 0.54 | 49690  | 44397  | 41822  |
| GHA | Ghana | 16582 | Asunafo           | 0.62 | 0.65 | 0.67 | 41341  | 35782  | 30279  |
| GHA | Ghana | 16583 | Asutifi           | 0.62 | 0.65 | 0.67 | 22628  | 19585  | 16573  |
| GHA | Ghana | 16584 | Atebubu           | 0.62 | 0.65 | 0.67 | 44034  | 38112  | 32250  |
| GHA | Ghana | 16585 | Berekum           | 0.62 | 0.65 | 0.67 | 27156  | 23504  | 19889  |
| GHA | Ghana | 16586 | Dormaa            | 0.62 | 0.65 | 0.67 | 41719  | 36109  | 30555  |
| GHA | Ghana | 16587 | Jaman             | 0.62 | 0.65 | 0.67 | 32749  | 28345  | 23986  |
| GHA | Ghana | 16588 | Kintampo          | 0.89 | 0.94 | 0.96 | 0      | 0      | 0      |
| GHA | Ghana | 16589 | Nkoranza          | 0.62 | 0.65 | 0.67 | 33765  | 29224  | 24729  |
| GHA | Ghana | 16590 | Sene              | 0.94 | 0.95 | 0.96 | 0      | 0      | 0      |
| GHA | Ghana | 16591 | Sunyani           | 0.62 | 0.65 | 0.67 | 40966  | 35457  | 30004  |
| GHA | Ghana | 16592 | Tano              | 0.62 | 0.65 | 0.67 | 29605  | 25624  | 21683  |

|     |       |       |                            |      |      |      |        |        |        |
|-----|-------|-------|----------------------------|------|------|------|--------|--------|--------|
| GHA | Ghana | 16593 | Techiman                   | 0.62 | 0.65 | 0.67 | 39219  | 33945  | 28724  |
| GHA | Ghana | 16594 | Wenchi                     | 0.62 | 0.65 | 0.67 | 37440  | 32405  | 27421  |
| GHA | Ghana | 16595 | Abura/Asebu/Kwamankese     | 0.49 | 0.53 | 0.54 | 42324  | 37815  | 35622  |
| GHA | Ghana | 16596 | Agona                      | 0.49 | 0.53 | 0.54 | 77708  | 69430  | 65403  |
| GHA | Ghana | 16597 | Ajumako Enyan              | 0.49 | 0.53 | 0.54 | 43408  | 38784  | 36535  |
| GHA | Ghana | 16598 | Asikuma/Odoben/Brakwa      | 0.49 | 0.53 | 0.54 | 37624  | 33616  | 31667  |
| GHA | Ghana | 16599 | Assin                      | 0.49 | 0.53 | 0.54 | 92722  | 82844  | 78040  |
| GHA | Ghana | 16600 | Awutu/Efutu/Senya          | 0.49 | 0.53 | 0.54 | 115803 | 103466 | 97466  |
| GHA | Ghana | 16601 | Cape Coast                 | 0.49 | 0.53 | 0.54 | 60788  | 54312  | 51162  |
| GHA | Ghana | 16602 | Komenda/Edina Aguafu       | 0.49 | 0.53 | 0.54 | 46924  | 41926  | 39494  |
| GHA | Ghana | 16603 | Mfantiman                  | 0.49 | 0.53 | 0.54 | 59441  | 53109  | 50029  |
| GHA | Ghana | 16604 | Twifu Heman/Lower Denkyira | 0.49 | 0.53 | 0.54 | 36186  | 32331  | 30456  |
| GHA | Ghana | 16605 | Upper Denkyira             | 0.49 | 0.53 | 0.54 | 42133  | 37645  | 35462  |
| GHA | Ghana | 16606 | Afram Plains               | 0.67 | 0.67 | 0.68 | 30792  | 29817  | 29225  |
| GHA | Ghana | 16607 | Akwapim North              | 0.67 | 0.67 | 0.68 | 21356  | 20680  | 20269  |
| GHA | Ghana | 16608 | Akwapim South              | 0.67 | 0.67 | 0.68 | 21836  | 21145  | 20724  |
| GHA | Ghana | 16609 | Asuogyaman                 | 0.67 | 0.67 | 0.68 | 14884  | 14413  | 14127  |
| GHA | Ghana | 16610 | Birim North                | 0.67 | 0.67 | 0.68 | 24876  | 24089  | 23610  |
| GHA | Ghana | 16611 | Birim South                | 0.67 | 0.67 | 0.68 | 37600  | 36410  | 35686  |
| GHA | Ghana | 16612 | East Akim                  | 0.67 | 0.67 | 0.68 | 39838  | 38578  | 37811  |
| GHA | Ghana | 16613 | Fanteakwa                  | 0.67 | 0.67 | 0.68 | 15401  | 14914  | 14617  |
| GHA | Ghana | 16614 | Kwaebirem                  | 0.67 | 0.67 | 0.68 | 26751  | 25905  | 25390  |
| GHA | Ghana | 16615 | Kwahu South                | 0.67 | 0.67 | 0.68 | 35160  | 34047  | 33370  |
| GHA | Ghana | 16616 | Manya Krobo                | 0.67 | 0.67 | 0.68 | 20847  | 20188  | 19786  |
| GHA | Ghana | 16617 | New Juaben                 | 0.67 | 0.67 | 0.68 | 27913  | 27029  | 26492  |
| GHA | Ghana | 16618 | Suhum/Krabo/Coaltar        | 0.67 | 0.67 | 0.68 | 25030  | 24238  | 23756  |
| GHA | Ghana | 16619 | West Akim                  | 0.67 | 0.67 | 0.68 | 29186  | 28262  | 27700  |
| GHA | Ghana | 16620 | Yilo Krobo                 | 0.67 | 0.67 | 0.68 | 15860  | 15358  | 15052  |
| GHA | Ghana | 16621 | Accra                      | 0.49 | 0.53 | 0.54 | 802375 | 716898 | 675322 |
| GHA | Ghana | 16622 | Dangbe East                | 0.49 | 0.53 | 0.54 | 44884  | 40102  | 37777  |
| GHA | Ghana | 16623 | Dangbe West                | 0.49 | 0.53 | 0.54 | 37638  | 33629  | 31679  |
| GHA | Ghana | 16624 | Ga                         | 0.49 | 0.53 | 0.54 | 305337 | 272809 | 256988 |
| GHA | Ghana | 16625 | Tema                       | 0.49 | 0.53 | 0.54 | 242073 | 216285 | 203742 |



|     |       |       |                  |      |      |      |        |       |       |
|-----|-------|-------|------------------|------|------|------|--------|-------|-------|
| GHA | Ghana | 16626 | Bole             | 0.54 | 0.60 | 0.65 | 47426  | 35936 | 26362 |
| GHA | Ghana | 16627 | East Gonja       | 0.54 | 0.60 | 0.65 | 71683  | 54316 | 39846 |
| GHA | Ghana | 16628 | East Mamprusi    | 0.54 | 0.60 | 0.65 | 68306  | 51757 | 37969 |
| GHA | Ghana | 16629 | Gushiegu/Karaga  | 0.54 | 0.60 | 0.65 | 53017  | 40172 | 29470 |
| GHA | Ghana | 16630 | Nanumba          | 0.54 | 0.60 | 0.65 | 68391  | 51821 | 38016 |
| GHA | Ghana | 16631 | Saboba/Chereponi | 0.54 | 0.60 | 0.65 | 34731  | 26316 | 19305 |
| GHA | Ghana | 16632 | Savelgu/Nanton   | 0.54 | 0.60 | 0.65 | 43158  | 32701 | 23990 |
| GHA | Ghana | 16633 | Tamale           | 0.54 | 0.60 | 0.65 | 108496 | 82209 | 60308 |
| GHA | Ghana | 16634 | Tolon/Kumbungu   | 0.54 | 0.60 | 0.65 | 31039  | 23519 | 17253 |
| GHA | Ghana | 16635 | West Gonja       | 0.54 | 0.60 | 0.65 | 48316  | 36610 | 26857 |
| GHA | Ghana | 16636 | West Mamprusi    | 0.54 | 0.60 | 0.65 | 48019  | 36385 | 26692 |
| GHA | Ghana | 16637 | Yendi            | 0.54 | 0.60 | 0.65 | 58987  | 44695 | 32788 |
| GHA | Ghana | 16638 | Zabzugu/Tatale   | 0.54 | 0.60 | 0.65 | 34975  | 26501 | 19441 |
| GHA | Ghana | 16639 | Bawku East       | 0.65 | 0.73 | 0.76 | 55739  | 26477 | 14127 |
| GHA | Ghana | 16640 | Bawku West       | 0.65 | 0.73 | 0.76 | 14113  | 6704  | 3577  |
| GHA | Ghana | 16641 | Bolgatanga       | 0.65 | 0.73 | 0.76 | 38397  | 18239 | 9732  |
| GHA | Ghana | 16642 | Bongo            | 0.65 | 0.73 | 0.76 | 14527  | 6901  | 3682  |
| GHA | Ghana | 16643 | Builsa           | 0.89 | 0.95 | 0.99 | 0      | 0     | 0     |
| GHA | Ghana | 16644 | Kasena/Nankani   | 0.89 | 0.95 | 0.99 | 0      | 0     | 0     |
| GHA | Ghana | 16645 | Jirapa/Lambussie | 0.62 | 0.64 | 0.67 | 26671  | 22948 | 19181 |
| GHA | Ghana | 16646 | Lawra            | 0.62 | 0.64 | 0.67 | 18959  | 16313 | 13635 |
| GHA | Ghana | 16647 | Nadowli          | 0.62 | 0.64 | 0.67 | 18906  | 16267 | 13597 |
| GHA | Ghana | 16648 | Sissala          | 0.62 | 0.64 | 0.67 | 20866  | 17954 | 15007 |
| GHA | Ghana | 16649 | Wa               | 0.62 | 0.64 | 0.67 | 50816  | 43723 | 36546 |
| GHA | Ghana | 16650 | Akatsi           | 0.67 | 0.67 | 0.68 | 16504  | 15982 | 15664 |
| GHA | Ghana | 16651 | Ho               | 0.67 | 0.67 | 0.68 | 48273  | 46745 | 45816 |
| GHA | Ghana | 16652 | Hohoe            | 0.67 | 0.67 | 0.68 | 36687  | 35526 | 34819 |
| GHA | Ghana | 16653 | Jasikan          | 0.67 | 0.67 | 0.68 | 17524  | 16969 | 16632 |
| GHA | Ghana | 16654 | Kadjebi          | 0.67 | 0.67 | 0.68 | 9806   | 9495  | 9307  |
| GHA | Ghana | 16655 | Kete-Krachi      | 0.67 | 0.67 | 0.68 | 35275  | 34158 | 33479 |
| GHA | Ghana | 16656 | Ketu             | 0.67 | 0.67 | 0.68 | 47222  | 45728 | 44818 |
| GHA | Ghana | 16657 | Kpandu           | 0.67 | 0.67 | 0.68 | 18359  | 17778 | 17424 |
| GHA | Ghana | 16658 | Nkwanta          | 0.67 | 0.67 | 0.68 | 23834  | 23080 | 22621 |

|     |        |       |                         |      |      |      |        |        |        |
|-----|--------|-------|-------------------------|------|------|------|--------|--------|--------|
| GHA | Ghana  | 16659 | North Tongu             | 0.67 | 0.67 | 0.68 | 21078  | 20410  | 20005  |
| GHA | Ghana  | 16661 | South Tongu             | 0.67 | 0.67 | 0.68 | 11748  | 11376  | 11150  |
| GHA | Ghana  | 16662 | Ahanta West             | 0.49 | 0.53 | 0.54 | 29477  | 26337  | 24810  |
| GHA | Ghana  | 16663 | Aowin Suaman            | 0.49 | 0.53 | 0.54 | 39222  | 35044  | 33011  |
| GHA | Ghana  | 16664 | Bibiani Anhwiaso-Bekwai | 0.49 | 0.53 | 0.54 | 44307  | 39587  | 37291  |
| GHA | Ghana  | 16665 | Jomoro                  | 0.49 | 0.53 | 0.54 | 47766  | 42678  | 40203  |
| GHA | Ghana  | 16666 | Juabeso-Bia             | 0.49 | 0.53 | 0.54 | 77838  | 69546  | 65513  |
| GHA | Ghana  | 16667 | Mpohor Wassa            | 0.49 | 0.53 | 0.54 | 49090  | 43860  | 41317  |
| GHA | Ghana  | 16668 | Nzema East              | 0.49 | 0.53 | 0.54 | 47643  | 42568  | 40099  |
| GHA | Ghana  | 16669 | Sefwi-Wiawso            | 0.49 | 0.53 | 0.54 | 75302  | 67280  | 63378  |
| GHA | Ghana  | 16670 | Shama Ahanta East       | 0.49 | 0.53 | 0.54 | 218240 | 194991 | 183683 |
| GHA | Ghana  | 16671 | Wassa Amenfi            | 0.49 | 0.53 | 0.54 | 85487  | 76380  | 71950  |
| GHA | Ghana  | 16672 | Wassa West              | 0.49 | 0.53 | 0.54 | 84377  | 75389  | 71017  |
| GHA | Ghana  | 33108 | Keta                    | 0.67 | 0.67 | 0.68 | 24118  | 23355  | 22891  |
| GHA | Ghana  | 33109 | Gomoa                   | 0.49 | 0.53 | 0.54 | 82027  | 73289  | 69038  |
| GIN | Guinea | 40708 | Boffa                   | 0.57 | 0.67 | 0.78 | 52824  | 29751  | 4745   |
| GIN | Guinea | 40709 | Boke                    | 0.57 | 0.67 | 0.78 | 126676 | 71346  | 11379  |
| GIN | Guinea | 40710 | Gaoual                  | 0.57 | 0.67 | 0.78 | 46528  | 26206  | 4179   |
| GIN | Guinea | 40711 | Koundara                | 0.57 | 0.67 | 0.78 | 30166  | 16990  | 2710   |
| GIN | Guinea | 40712 | Dixinn                  | 0.57 | 0.67 | 0.78 | 86711  | 48837  | 7789   |
| GIN | Guinea | 40713 | Kaloum                  | 0.57 | 0.67 | 0.78 | 77324  | 43550  | 6946   |
| GIN | Guinea | 40714 | Matam                   | 0.57 | 0.67 | 0.78 | 96099  | 54125  | 8632   |
| GIN | Guinea | 40715 | Matoto                  | 0.57 | 0.67 | 0.78 | 104725 | 58983  | 9407   |
| GIN | Guinea | 40716 | Ratoma                  | 0.57 | 0.67 | 0.78 | 89893  | 50630  | 8075   |
| GIN | Guinea | 40717 | Dabola                  | 0.57 | 0.67 | 0.78 | 43004  | 24221  | 3863   |
| GIN | Guinea | 40718 | Dinguiraye              | 0.57 | 0.67 | 0.78 | 48291  | 27198  | 4338   |
| GIN | Guinea | 40719 | Faranah                 | 0.57 | 0.72 | 0.91 | 52273  | 18698  | 0      |
| GIN | Guinea | 40720 | Kissidougou             | 0.57 | 0.67 | 0.78 | 76981  | 43357  | 6915   |
| GIN | Guinea | 40721 | Kankan                  | 0.57 | 0.67 | 0.78 | 105697 | 59531  | 9494   |
| GIN | Guinea | 40722 | Kerouane                | 0.57 | 0.67 | 0.78 | 69227  | 38990  | 6218   |
| GIN | Guinea | 40723 | Kouroussa               | 0.57 | 0.67 | 0.78 | 53293  | 30016  | 4787   |
| GIN | Guinea | 40724 | Mandiana                | 0.87 | 0.90 | 0.91 | 0      | 0      | 0      |
| GIN | Guinea | 40725 | Siguiiri                | 0.57 | 0.67 | 0.78 | 114852 | 64687  | 10317  |

|     |        |       |                  |      |      |      |        |        |       |
|-----|--------|-------|------------------|------|------|------|--------|--------|-------|
| GIN | Guinea | 40726 | Coyah            | 0.57 | 0.67 | 0.78 | 100952 | 56858  | 9068  |
| GIN | Guinea | 40727 | Dubreka          | 0.57 | 0.67 | 0.78 | 47304  | 26643  | 4249  |
| GIN | Guinea | 40728 | Forecariah       | 0.57 | 0.67 | 0.78 | 102279 | 57605  | 9187  |
| GIN | Guinea | 40729 | Fria             | 0.57 | 0.67 | 0.78 | 33638  | 18946  | 3022  |
| GIN | Guinea | 40730 | Kindia           | 0.57 | 0.67 | 0.78 | 130267 | 73369  | 11702 |
| GIN | Guinea | 40731 | Telemele         | 0.57 | 0.67 | 0.78 | 70363  | 39630  | 6321  |
| GIN | Guinea | 40732 | Koubia           | 0.57 | 0.67 | 0.78 | 31115  | 17524  | 2795  |
| GIN | Guinea | 40733 | Labe             | 0.57 | 0.67 | 0.78 | 88010  | 49569  | 7906  |
| GIN | Guinea | 40734 | Lelouma          | 0.57 | 0.67 | 0.78 | 38580  | 21729  | 3466  |
| GIN | Guinea | 40735 | Mali             | 0.57 | 0.67 | 0.78 | 57240  | 32239  | 5142  |
| GIN | Guinea | 40736 | Tougue           | 0.57 | 0.67 | 0.78 | 43535  | 24520  | 3911  |
| GIN | Guinea | 40737 | Dalaba           | 0.57 | 0.67 | 0.78 | 49941  | 28128  | 4486  |
| GIN | Guinea | 40738 | Mamou            | 0.57 | 0.67 | 0.78 | 101750 | 57308  | 9140  |
| GIN | Guinea | 40739 | Pita             | 0.57 | 0.67 | 0.78 | 72220  | 40675  | 6487  |
| GIN | Guinea | 40740 | Beyla            | 0.57 | 0.67 | 0.78 | 58944  | 33198  | 5295  |
| GIN | Guinea | 40741 | Gueckedou        | 0.57 | 0.67 | 0.78 | 191638 | 107934 | 17214 |
| GIN | Guinea | 40742 | Lola             | 0.57 | 0.67 | 0.78 | 57852  | 32583  | 5197  |
| GIN | Guinea | 40743 | Macenta          | 0.57 | 0.69 | 0.83 | 132825 | 65123  | 0     |
| GIN | Guinea | 40744 | N'Zerekore       | 0.57 | 0.69 | 0.83 | 106815 | 52371  | 0     |
| GIN | Guinea | 40745 | Yomou            | 0.57 | 0.67 | 0.78 | 77888  | 43868  | 6996  |
| GMB | Gambia | 16405 | Banjul           | 0.76 | 0.77 | 0.77 | 711    | 565    | 558   |
| GMB | Gambia | 16406 | Fulladu West     | 0.76 | 0.77 | 0.77 | 3773   | 3001   | 2960  |
| GMB | Gambia | 16407 | Janjanbureh      | 0.76 | 0.77 | 0.77 | 139    | 110    | 109   |
| GMB | Gambia | 16408 | Lower Saloum     | 0.76 | 0.77 | 0.77 | 712    | 566    | 558   |
| GMB | Gambia | 16409 | Niamina Dankunku | 0.76 | 0.77 | 0.77 | 364    | 289    | 285   |
| GMB | Gambia | 16410 | Niamina East     | 0.76 | 0.77 | 0.77 | 1028   | 818    | 807   |
| GMB | Gambia | 16411 | Niamina West     | 0.76 | 0.77 | 0.77 | 371    | 295    | 291   |
| GMB | Gambia | 16412 | Niani            | 0.76 | 0.77 | 0.77 | 1489   | 1184   | 1168  |
| GMB | Gambia | 16413 | Nianija          | 0.76 | 0.77 | 0.77 | 424    | 337    | 333   |
| GMB | Gambia | 16414 | Sami             | 0.76 | 0.77 | 0.77 | 1278   | 1017   | 1003  |
| GMB | Gambia | 16415 | Upper Saloum     | 0.76 | 0.77 | 0.77 | 853    | 679    | 669   |
| GMB | Gambia | 16416 | Kombo Saint Mary | 0.76 | 0.77 | 0.77 | 23938  | 19040  | 18782 |
| GMB | Gambia | 16417 | Jarra Central    | 0.76 | 0.77 | 0.77 | 339    | 270    | 266   |

|     |               |       |                      |      |      |      |       |       |       |
|-----|---------------|-------|----------------------|------|------|------|-------|-------|-------|
| GMB | Gambia        | 16418 | Jarra East           | 0.76 | 0.77 | 0.77 | 745   | 593   | 585   |
| GMB | Gambia        | 16419 | Jarra West           | 0.76 | 0.77 | 0.77 | 1372  | 1091  | 1076  |
| GMB | Gambia        | 16420 | Kiang Central        | 0.76 | 0.77 | 0.77 | 379   | 302   | 298   |
| GMB | Gambia        | 16421 | Kiang East           | 0.76 | 0.77 | 0.77 | 347   | 276   | 273   |
| GMB | Gambia        | 16422 | Kiang West           | 0.76 | 0.77 | 0.77 | 867   | 689   | 680   |
| GMB | Gambia        | 16423 | Central Baddibu      | 0.76 | 0.77 | 0.77 | 1119  | 890   | 878   |
| GMB | Gambia        | 16424 | Jokadu               | 0.76 | 0.77 | 0.77 | 1131  | 900   | 888   |
| GMB | Gambia        | 16425 | Lower Baddibu        | 0.76 | 0.77 | 0.77 | 1061  | 844   | 833   |
| GMB | Gambia        | 16426 | Lower Niumi          | 0.76 | 0.77 | 0.77 | 2569  | 2044  | 2016  |
| GMB | Gambia        | 16427 | Upper Baddibu        | 0.76 | 0.77 | 0.77 | 4052  | 3223  | 3179  |
| GMB | Gambia        | 16428 | Upper Niumi          | 0.76 | 0.77 | 0.77 | 1341  | 1067  | 1052  |
| GMB | Gambia        | 16429 | Fulladu East         | 0.76 | 0.77 | 0.77 | 5614  | 4465  | 4405  |
| GMB | Gambia        | 16430 | Kantora              | 0.76 | 0.77 | 0.77 | 2027  | 1612  | 1590  |
| GMB | Gambia        | 16431 | Sandu                | 0.76 | 0.77 | 0.77 | 940   | 747   | 737   |
| GMB | Gambia        | 16432 | Wuli                 | 0.76 | 0.77 | 0.77 | 2081  | 1655  | 1633  |
| GMB | Gambia        | 16433 | Foni Bintang-karenai | 0.76 | 0.77 | 0.77 | 827   | 658   | 649   |
| GMB | Gambia        | 16434 | Foni Bondali         | 0.76 | 0.77 | 0.77 | 312   | 248   | 245   |
| GMB | Gambia        | 16435 | Foni Brefet          | 0.76 | 0.77 | 0.77 | 634   | 504   | 498   |
| GMB | Gambia        | 16436 | Foni Jarrol          | 0.76 | 0.77 | 0.77 | 304   | 242   | 238   |
| GMB | Gambia        | 16437 | Foni Kansala         | 0.76 | 0.77 | 0.77 | 665   | 529   | 522   |
| GMB | Gambia        | 16438 | Kombo Central        | 0.76 | 0.77 | 0.77 | 6011  | 4781  | 4716  |
| GMB | Gambia        | 16439 | Kombo East           | 0.76 | 0.77 | 0.77 | 1472  | 1170  | 1155  |
| GMB | Gambia        | 16440 | Kombo North          | 0.76 | 0.77 | 0.77 | 10632 | 8456  | 8342  |
| GMB | Gambia        | 16441 | Kombo South          | 0.76 | 0.77 | 0.77 | 3708  | 2949  | 2909  |
| GNB | Guinea-Bissau | 17068 | Bafata               | 0.18 | 0.18 | 0.18 | 63562 | 63562 | 63562 |
| GNB | Guinea-Bissau | 17069 | Bambadinca           | 0.18 | 0.18 | 0.18 | 23455 | 23455 | 23455 |
| GNB | Guinea-Bissau | 17070 | Contuboe             | 0.18 | 0.18 | 0.18 | 32465 | 32465 | 32465 |
| GNB | Guinea-Bissau | 17071 | Galomaro/cosse       | 0.18 | 0.18 | 0.18 | 11049 | 11049 | 11049 |
| GNB | Guinea-Bissau | 17072 | Gamamudo/ganadu      | 0.18 | 0.18 | 0.18 | 18417 | 18417 | 18417 |
| GNB | Guinea-Bissau | 17073 | Xitole               | 0.18 | 0.18 | 0.18 | 13539 | 13539 | 13539 |
| GNB | Guinea-Bissau | 17074 | Prabis               | 0.18 | 0.18 | 0.18 | 21688 | 21688 | 21688 |
| GNB | Guinea-Bissau | 17075 | Quinhamel            | 0.18 | 0.18 | 0.18 | 31761 | 31761 | 31761 |
| GNB | Guinea-Bissau | 17076 | Safim                | 0.18 | 0.18 | 0.18 | 15441 | 15441 | 15441 |

|     |                   |       |                           |      |      |      |        |        |        |
|-----|-------------------|-------|---------------------------|------|------|------|--------|--------|--------|
| GNB | Guinea-Bissau     | 17077 | Bolama                    | 0.18 | 0.18 | 0.18 | 6403   | 6403   | 6403   |
| GNB | Guinea-Bissau     | 17078 | Bubaque                   | 0.18 | 0.18 | 0.18 | 7321   | 7321   | 7321   |
| GNB | Guinea-Bissau     | 17079 | Caravela                  | 0.18 | 0.18 | 0.18 | 3028   | 3028   | 3028   |
| GNB | Guinea-Bissau     | 17080 | Uno                       | 0.18 | 0.18 | 0.18 | 5031   | 5031   | 5031   |
| GNB | Guinea-Bissau     | 17081 | Bigene                    | 0.18 | 0.18 | 0.18 | 39741  | 39741  | 39741  |
| GNB | Guinea-Bissau     | 17082 | Bula                      | 0.18 | 0.18 | 0.18 | 20985  | 20985  | 20985  |
| GNB | Guinea-Bissau     | 17083 | Cacheu/calequisse         | 0.18 | 0.18 | 0.18 | 16801  | 16801  | 16801  |
| GNB | Guinea-Bissau     | 17084 | Caio                      | 0.18 | 0.18 | 0.18 | 9661   | 9661   | 9661   |
| GNB | Guinea-Bissau     | 17085 | Canchungo                 | 0.18 | 0.18 | 0.18 | 31965  | 31965  | 31965  |
| GNB | Guinea-Bissau     | 17086 | Sao Domingos              | 0.18 | 0.18 | 0.18 | 25238  | 25238  | 25238  |
| GNB | Guinea-Bissau     | 17087 | Boe                       | 0.18 | 0.18 | 0.18 | 7968   | 7968   | 7968   |
| GNB | Guinea-Bissau     | 17088 | Gabu                      | 0.18 | 0.18 | 0.18 | 61441  | 61441  | 61441  |
| GNB | Guinea-Bissau     | 17089 | Pirada                    | 0.18 | 0.18 | 0.18 | 22931  | 22931  | 22931  |
| GNB | Guinea-Bissau     | 17090 | Pitche                    | 0.18 | 0.18 | 0.18 | 32209  | 32209  | 32209  |
| GNB | Guinea-Bissau     | 17091 | Sonaco                    | 0.18 | 0.18 | 0.18 | 27793  | 27793  | 27793  |
| GNB | Guinea-Bissau     | 17092 | Bissora                   | 0.18 | 0.18 | 0.18 | 39992  | 39992  | 39992  |
| GNB | Guinea-Bissau     | 17093 | Farim                     | 0.18 | 0.18 | 0.18 | 33867  | 33867  | 33867  |
| GNB | Guinea-Bissau     | 17094 | Mansaba                   | 0.18 | 0.18 | 0.18 | 36417  | 36417  | 36417  |
| GNB | Guinea-Bissau     | 17095 | Mansoa                    | 0.18 | 0.18 | 0.18 | 35381  | 35381  | 35381  |
| GNB | Guinea-Bissau     | 17096 | Nhacra                    | 0.18 | 0.18 | 0.18 | 15020  | 15020  | 15020  |
| GNB | Guinea-Bissau     | 17097 | Buba                      | 0.18 | 0.18 | 0.18 | 12402  | 12402  | 12402  |
| GNB | Guinea-Bissau     | 17098 | Empada                    | 0.18 | 0.18 | 0.18 | 11466  | 11466  | 11466  |
| GNB | Guinea-Bissau     | 17099 | Fulacunda                 | 0.18 | 0.18 | 0.18 | 10823  | 10823  | 10823  |
| GNB | Guinea-Bissau     | 17100 | Tite                      | 0.18 | 0.18 | 0.18 | 10484  | 10484  | 10484  |
| GNB | Guinea-Bissau     | 17101 | Sector Autonomo De Bissau | 0.18 | 0.18 | 0.18 | 305434 | 305434 | 305434 |
| GNB | Guinea-Bissau     | 17102 | Bedanda                   | 0.18 | 0.18 | 0.18 | 19647  | 19647  | 19647  |
| GNB | Guinea-Bissau     | 17103 | Cacine                    | 0.18 | 0.18 | 0.18 | 10805  | 10805  | 10805  |
| GNB | Guinea-Bissau     | 17104 | Catio                     | 0.18 | 0.18 | 0.18 | 24532  | 24532  | 24532  |
| GNB | Guinea-Bissau     | 17105 | Komo                      | 0.18 | 0.18 | 0.18 | 7216   | 7216   | 7216   |
| GNB | Guinea-Bissau     | 17106 | Quebo                     | 0.18 | 0.18 | 0.18 | 11096  | 11096  | 11096  |
| GNQ | Equatorial Guinea | 15829 | Admin unit not available  | 0.00 | 0.00 | 0.00 | 145100 | 145100 | 145100 |
| GNQ | Equatorial Guinea | 15830 | Admin unit not available  | 0.00 | 0.00 | 0.00 | 19716  | 19716  | 19716  |
| GNQ | Equatorial Guinea | 15831 | Admin unit not available  | 0.00 | 0.00 | 0.00 | 83204  | 83204  | 83204  |

|     |                   |       |                                            |      |      |      |        |        |        |
|-----|-------------------|-------|--------------------------------------------|------|------|------|--------|--------|--------|
| GNQ | Equatorial Guinea | 15832 | Admin unit not available                   | 0.00 | 0.00 | 0.00 | 109932 | 109932 | 109932 |
| GNQ | Equatorial Guinea | 15833 | Admin unit not available                   | 0.00 | 0.00 | 0.00 | 190273 | 190273 | 190273 |
| GNQ | Equatorial Guinea | 15834 | Admin unit not available                   | 0.00 | 0.00 | 0.00 | 104070 | 104070 | 104070 |
| GUF | French Guiana     | 16334 | Camopi                                     | 0.00 | 0.00 | 0.00 | 1722   | 1722   | 1722   |
| GUF | French Guiana     | 16335 | Iracoubo                                   | 0.00 | 0.00 | 0.00 | 1923   | 1923   | 1923   |
| GUF | French Guiana     | 16336 | Kourou                                     | 0.00 | 0.00 | 0.00 | 23244  | 23244  | 23244  |
| GUF | French Guiana     | 16337 | Matoury                                    | 0.00 | 0.00 | 0.00 | 26132  | 26132  | 26132  |
| GUF | French Guiana     | 16338 | Montsinery                                 | 0.00 | 0.00 | 0.00 | 3233   | 3233   | 3233   |
| GUF | French Guiana     | 16339 | Ouanary                                    | 0.00 | 0.00 | 0.00 | 72     | 72     | 72     |
| GUF | French Guiana     | 16340 | Regina                                     | 0.00 | 0.00 | 0.00 | 739    | 739    | 739    |
| GUF | French Guiana     | 16341 | Remire (montjoly)                          | 0.00 | 0.00 | 0.00 | 61298  | 61298  | 61298  |
| GUF | French Guiana     | 16342 | Roura                                      | 0.00 | 0.00 | 0.00 | 2887   | 2887   | 2887   |
| GUF | French Guiana     | 16343 | Saint Georges                              | 0.00 | 0.00 | 0.00 | 6067   | 6067   | 6067   |
| GUF | French Guiana     | 16344 | Saint-elie                                 | 0.00 | 0.00 | 0.00 | 782    | 782    | 782    |
| GUF | French Guiana     | 16345 | Sinnamary                                  | 0.00 | 0.00 | 0.00 | 2715   | 2715   | 2715   |
| GUF | French Guiana     | 16346 | Tonate (macouria)                          | 0.00 | 0.00 | 0.00 | 9793   | 9793   | 9793   |
| GUF | French Guiana     | 16347 | Apatou                                     | 0.00 | 0.00 | 0.00 | 7392   | 7392   | 7392   |
| GUF | French Guiana     | 16348 | Awala-yalimapo                             | 0.00 | 0.00 | 0.00 | 1233   | 1233   | 1233   |
| GUF | French Guiana     | 16349 | Grand-santi                                | 0.00 | 0.00 | 0.00 | 4475   | 4475   | 4475   |
| GUF | French Guiana     | 16350 | Mana                                       | 0.00 | 0.00 | 0.00 | 9278   | 9278   | 9278   |
| GUF | French Guiana     | 16351 | Maripasoula                                | 0.00 | 0.00 | 0.00 | 9086   | 9086   | 9086   |
| GUF | French Guiana     | 16352 | Papaichton (pompidou)                      | 0.00 | 0.00 | 0.00 | 5352   | 5352   | 5352   |
| GUF | French Guiana     | 16353 | Saint-laurent-du-maroni                    | 0.00 | 0.00 | 0.00 | 43069  | 43069  | 43069  |
| GUF | French Guiana     | 16354 | Saul                                       | 0.00 | 0.00 | 0.00 | 158    | 158    | 158    |
| GUY | Guyana            | 17140 | Barima/amakura                             | 0.25 | 0.25 | 0.25 | 9403   | 9403   | 9403   |
| GUY | Guyana            | 17141 | Waini                                      | 0.25 | 0.25 | 0.25 | 5975   | 5975   | 5975   |
| GUY | Guyana            | 17142 | Cuyuni                                     | 0.25 | 0.25 | 0.25 | 2501   | 2501   | 2501   |
| GUY | Guyana            | 17143 | Mazaruni/left Bank Essequibo River         | 0.25 | 0.25 | 0.25 | 9610   | 9610   | 9610   |
| GUY | Guyana            | 17144 | Buxton/mahaica                             | 0.25 | 0.25 | 0.25 | 43071  | 43071  | 43071  |
| GUY | Guyana            | 17145 | Moblissa/la Reconnaissance                 | 0.25 | 0.25 | 0.25 | 129131 | 129131 | 129131 |
| GUY | Guyana            | 17146 | Black Bush Polder Frontlands And Extension | 0.25 | 0.25 | 0.25 | 12575  | 12575  | 12575  |
| GUY | Guyana            | 17147 | East Berbice/west Canje                    | 0.25 | 0.25 | 0.25 | 10790  | 10790  | 10790  |
| GUY | Guyana            | 17148 | East Canje/east Coast Berbice              | 0.25 | 0.25 | 0.25 | 23006  | 23006  | 23006  |

|     |        |       |                                             |      |      |      |         |         |         |
|-----|--------|-------|---------------------------------------------|------|------|------|---------|---------|---------|
| GUY | Guyana | 17149 | Left Bank Upper Canje/ikuruwa/corentyne     | 0.25 | 0.25 | 0.25 | 314     | 314     | 314     |
| GUY | Guyana | 17150 | Lower Corentyne River/canje                 | 0.25 | 0.25 | 0.25 | 9426    | 9426    | 9426    |
| GUY | Guyana | 17151 | Upper Canje/corentyne                       | 0.25 | 0.25 | 0.25 | 540     | 540     | 540     |
| GUY | Guyana | 17152 | Upper Corentyne                             | 0.25 | 0.25 | 0.25 | 582     | 582     | 582     |
| GUY | Guyana | 17153 | Bonasika/boerasirie                         | 0.25 | 0.25 | 0.25 | 23584   | 23584   | 23584   |
| GUY | Guyana | 17154 | Essequibo Islands/left Bank Essequibo River | 0.25 | 0.25 | 0.25 | 6761    | 6761    | 6761    |
| GUY | Guyana | 17155 | Lower West Demerara River                   | 0.25 | 0.25 | 0.25 | 33530   | 33530   | 33530   |
| GUY | Guyana | 17156 | Mahaica/mahaicony                           | 0.25 | 0.25 | 0.25 | 4884    | 4884    | 4884    |
| GUY | Guyana | 17157 | Mahaicony/berbice                           | 0.25 | 0.25 | 0.25 | 25351   | 25351   | 25351   |
| GUY | Guyana | 17158 | Moruka/pomeroon                             | 0.25 | 0.25 | 0.25 | 6173    | 6173    | 6173    |
| GUY | Guyana | 17159 | Somerset And Berks/supenaam River           | 0.25 | 0.25 | 0.25 | 19229   | 19229   | 19229   |
| GUY | Guyana | 17160 | Ireng/upper Potaro                          | 0.25 | 0.25 | 0.25 | 3307    | 3307    | 3307    |
| GUY | Guyana | 17161 | Lower Potaro/lower Lady Smith Creek         | 0.25 | 0.25 | 0.25 | 3243    | 3243    | 3243    |
| GUY | Guyana | 17162 | Right Bank Essequibo/upper Demerara         | 0.25 | 0.25 | 0.25 | 18549   | 18549   | 18549   |
| GUY | Guyana | 17163 | Torani/bulletwood                           | 0.25 | 0.25 | 0.25 | 3659    | 3659    | 3659    |
| GUY | Guyana | 17164 | Rupununi West                               | 0.25 | 0.25 | 0.25 | 12929   | 12929   | 12929   |
| GUY | Guyana | 17165 | Rewai/upper Essequibo                       | 0.25 | 0.25 | 0.25 | 1359    | 1359    | 1359    |
| KEN | Kenya  | 61034 | Admin unit not available                    | 0.00 | 0.00 | 0.00 | 14809   | 14809   | 14809   |
| KEN | Kenya  | 51334 | Kirinyaga                                   | 0.00 | 0.00 | 0.00 | 520224  | 520224  | 520224  |
| KEN | Kenya  | 51337 | Nyandarua                                   | 0.00 | 0.00 | 0.00 | 578584  | 578584  | 578584  |
| KEN | Kenya  | 51338 | Nyeri                                       | 0.00 | 0.00 | 0.00 | 685906  | 685906  | 685906  |
| KEN | Kenya  | 51341 | Kwale                                       | 0.00 | 0.00 | 0.00 | 626147  | 626147  | 626147  |
| KEN | Kenya  | 51342 | Lamu                                        | 0.00 | 0.00 | 0.00 | 89187   | 89187   | 89187   |
| KEN | Kenya  | 51343 | Malindi                                     | 0.00 | 0.00 | 0.00 | 388851  | 388851  | 388851  |
| KEN | Kenya  | 51345 | Taita Taveta                                | 0.00 | 0.00 | 0.00 | 284844  | 284844  | 284844  |
| KEN | Kenya  | 51346 | Tana River                                  | 0.00 | 0.00 | 0.00 | 234071  | 234071  | 234071  |
| KEN | Kenya  | 51348 | Isiolo                                      | 0.00 | 0.00 | 0.00 | 142907  | 142907  | 142907  |
| KEN | Kenya  | 51350 | Machakos                                    | 0.00 | 0.00 | 0.00 | 1087505 | 1087505 | 1087505 |
| KEN | Kenya  | 51351 | Makueni                                     | 0.00 | 0.00 | 0.00 | 858963  | 858963  | 858963  |
| KEN | Kenya  | 51360 | Nairobi                                     | 0.00 | 0.00 | 0.00 | 3487590 | 3487590 | 3487590 |
| KEN | Kenya  | 51363 | Mandera                                     | 0.00 | 0.00 | 0.00 | 984372  | 984372  | 984372  |
| KEN | Kenya  | 51364 | Wajir                                       | 0.00 | 0.00 | 0.00 | 652102  | 652102  | 652102  |
| KEN | Kenya  | 51372 | Nyamira                                     | 0.00 | 0.00 | 0.00 | 581362  | 581362  | 581362  |

|     |       |         |                          |      |      |      |         |         |         |
|-----|-------|---------|--------------------------|------|------|------|---------|---------|---------|
| KEN | Kenya | 51380   | Kajiado                  | 0.00 | 0.00 | 0.00 | 678246  | 678246  | 678246  |
| KEN | Kenya | 51382   | Kericho                  | 0.00 | 0.00 | 0.00 | 576395  | 576395  | 576395  |
| KEN | Kenya | 51384   | Laikipia                 | 0.00 | 0.00 | 0.00 | 398425  | 398425  | 398425  |
| KEN | Kenya | 51386   | Nakuru                   | 0.00 | 0.00 | 0.00 | 1624299 | 1624299 | 1624299 |
| KEN | Kenya | 51389   | Samburu                  | 0.00 | 0.00 | 0.00 | 218820  | 218820  | 218820  |
| KEN | Kenya | 51391   | Trans Nzoia              | 0.00 | 0.00 | 0.00 | 814027  | 814027  | 814027  |
| KEN | Kenya | 51392   | Turkana                  | 0.00 | 0.00 | 0.00 | 785345  | 785345  | 785345  |
| KEN | Kenya | 51393   | Uasin Gishu              | 0.00 | 0.00 | 0.00 | 916044  | 916044  | 916044  |
| KEN | Kenya | 51394   | West Pokot               | 0.00 | 0.00 | 0.00 | 498760  | 498760  | 498760  |
| KEN | Kenya | 61001   | Admin unit not available | 0.00 | 0.00 | 0.00 | 1503    | 1503    | 1503    |
| KEN | Kenya | 61005   | Admin unit not available | 0.00 | 0.00 | 0.00 | 7370    | 7370    | 7370    |
| KEN | Kenya | 61009   | Admin unit not available | 0.00 | 0.00 | 0.00 | 56880   | 56880   | 56880   |
| KEN | Kenya | 1013969 | Baringo                  | 0.63 | 0.63 | 0.63 | 112712  | 112712  | 112712  |
| KEN | Kenya | 1013970 | Bomet                    | 0.00 | 0.00 | 0.00 | 865355  | 865355  | 865355  |
| KEN | Kenya | 1013971 | Bungoma                  | 0.00 | 0.00 | 0.00 | 1358527 | 1358527 | 1358527 |
| KEN | Kenya | 1013972 | Busia                    | 0.00 | 0.00 | 0.00 | 673078  | 673078  | 673078  |
| KEN | Kenya | 1013973 | Elgeyo Marakwet          | 0.63 | 0.63 | 0.63 | 75283   | 75283   | 75283   |
| KEN | Kenya | 1013974 | Embu                     | 0.00 | 0.00 | 0.00 | 508229  | 508229  | 508229  |
| KEN | Kenya | 1013975 | Garissa                  | 0.00 | 0.00 | 0.00 | 617117  | 617117  | 617117  |
| KEN | Kenya | 1013976 | Homa Bay                 | 0.00 | 0.00 | 0.00 | 899250  | 899250  | 899250  |
| KEN | Kenya | 1013977 | Kiambu                   | 0.00 | 0.00 | 0.00 | 1865247 | 1865247 | 1865247 |
| KEN | Kenya | 1013978 | Kisumu                   | 0.00 | 0.00 | 0.00 | 974966  | 974966  | 974966  |
| KEN | Kenya | 1013979 | Kitui                    | 0.00 | 0.00 | 0.00 | 991566  | 991566  | 991566  |
| KEN | Kenya | 1013980 | Marsabit                 | 0.00 | 0.00 | 0.00 | 279292  | 279292  | 279292  |
| KEN | Kenya | 1013981 | Mombasa                  | 0.00 | 0.00 | 0.00 | 1600430 | 1600430 | 1600430 |
| KEN | Kenya | 1013982 | Muranga                  | 0.00 | 0.00 | 0.00 | 733644  | 733644  | 733644  |
| KEN | Kenya | 1013983 | Narok                    | 0.00 | 0.00 | 0.00 | 830680  | 830680  | 830680  |
| KEN | Kenya | 1013984 | Siaya                    | 0.00 | 0.00 | 0.00 | 789973  | 789973  | 789973  |
| KEN | Kenya | 1013985 | Tharaka                  | 0.00 | 0.00 | 0.00 | 359024  | 359024  | 359024  |
| KEN | Kenya | 1013986 | Nandi                    | 0.00 | 0.00 | 0.00 | 747614  | 747614  | 747614  |
| KEN | Kenya | 1013987 | Meru                     | 0.00 | 0.00 | 0.00 | 1323922 | 1323922 | 1323922 |
| KEN | Kenya | 1013988 | Migori                   | 0.00 | 0.00 | 0.00 | 878164  | 878164  | 878164  |
| KEN | Kenya | 1013989 | Kisii                    | 0.00 | 0.00 | 0.00 | 1123555 | 1123555 | 1123555 |



|     |         |         |                 |      |      |      |         |         |         |
|-----|---------|---------|-----------------|------|------|------|---------|---------|---------|
| KEN | Kenya   | 1013990 | Kakamega        | 0.00 | 0.00 | 0.00 | 1394543 | 1394543 | 1394543 |
| KEN | Kenya   | 1013991 | Vihiga          | 0.00 | 0.00 | 0.00 | 771923  | 771923  | 771923  |
| LBR | Liberia | 39172   | Klay            | 0.22 | 0.22 | 0.22 | 82961   | 82961   | 82961   |
| LBR | Liberia | 39173   | Mecca           | 0.22 | 0.22 | 0.22 | 5754    | 5754    | 5754    |
| LBR | Liberia | 39174   | Fuamah          | 0.37 | 0.38 | 0.38 | 17888   | 17385   | 17219   |
| LBR | Liberia | 39175   | Jorquelleh      | 0.37 | 0.38 | 0.38 | 45008   | 43744   | 43325   |
| LBR | Liberia | 39176   | Kokoyah         | 0.37 | 0.38 | 0.38 | 15335   | 14904   | 14762   |
| LBR | Liberia | 39177   | Panta-Kpa       | 0.37 | 0.38 | 0.38 | 22442   | 21811   | 21603   |
| LBR | Liberia | 39178   | Salala          | 0.37 | 0.38 | 0.38 | 21157   | 20562   | 20366   |
| LBR | Liberia | 39179   | Sanayea         | 0.37 | 0.38 | 0.38 | 17432   | 16943   | 16780   |
| LBR | Liberia | 39180   | Suakoko         | 0.37 | 0.38 | 0.38 | 34992   | 34009   | 33684   |
| LBR | Liberia | 39181   | Zota            | 0.37 | 0.38 | 0.38 | 9932    | 9653    | 9561    |
| LBR | Liberia | 39182   | Belle Yella     | 0.22 | 0.22 | 0.22 | 13946   | 13946   | 13946   |
| LBR | Liberia | 39183   | Bokomu          | 0.22 | 0.22 | 0.22 | 14056   | 14056   | 14056   |
| LBR | Liberia | 39184   | Bopolu          | 0.22 | 0.22 | 0.22 | 14707   | 14707   | 14707   |
| LBR | Liberia | 39185   | Gbarma          | 0.22 | 0.22 | 0.22 | 12111   | 12111   | 12111   |
| LBR | Liberia | 39186   | Kongba          | 0.22 | 0.22 | 0.22 | 9130    | 9130    | 9130    |
| LBR | Liberia | 39187   | District #1     | 0.85 | 0.85 | 0.86 | 0       | 0       | 0       |
| LBR | Liberia | 39188   | District #2     | 0.85 | 0.85 | 0.86 | 0       | 0       | 0       |
| LBR | Liberia | 39189   | District #3     | 0.85 | 0.85 | 0.86 | 0       | 0       | 0       |
| LBR | Liberia | 39190   | District #4     | 0.85 | 0.85 | 0.86 | 0       | 0       | 0       |
| LBR | Liberia | 39191   | Garwula         | 0.22 | 0.22 | 0.22 | 26916   | 26916   | 26916   |
| LBR | Liberia | 39192   | Gola Konneh     | 0.22 | 0.22 | 0.22 | 22236   | 22236   | 22236   |
| LBR | Liberia | 39193   | Porkpa          | 0.22 | 0.22 | 0.22 | 28684   | 28684   | 28684   |
| LBR | Liberia | 39194   | Robertsport     | 0.22 | 0.22 | 0.22 | 4541    | 4541    | 4541    |
| LBR | Liberia | 39195   | Tewor           | 0.22 | 0.22 | 0.22 | 11773   | 11773   | 11773   |
| LBR | Liberia | 39196   | Gbarzon         | 0.85 | 0.85 | 0.85 | 0       | 0       | 0       |
| LBR | Liberia | 39197   | Konobo          | 0.85 | 0.85 | 0.85 | 0       | 0       | 0       |
| LBR | Liberia | 39198   | Tchien          | 0.85 | 0.85 | 0.85 | 0       | 0       | 0       |
| LBR | Liberia | 39199   | Buah            | 0.22 | 0.22 | 0.22 | 6102    | 6102    | 6102    |
| LBR | Liberia | 39200   | Sasstown        | 0.22 | 0.22 | 0.22 | 9569    | 9569    | 9569    |
| LBR | Liberia | 39201   | Trehn           | 0.22 | 0.22 | 0.22 | 10912   | 10912   | 10912   |
| LBR | Liberia | 39202   | Upper Kru Coast | 0.22 | 0.22 | 0.22 | 18206   | 18206   | 18206   |

|     |         |       |                     |      |      |      |        |        |        |
|-----|---------|-------|---------------------|------|------|------|--------|--------|--------|
| LBR | Liberia | 39203 | Foya                | 0.50 | 0.50 | 0.50 | 25651  | 25651  | 25651  |
| LBR | Liberia | 39204 | Kolahun             | 0.50 | 0.50 | 0.50 | 28872  | 28872  | 28872  |
| LBR | Liberia | 39205 | Salayea             | 0.22 | 0.22 | 0.22 | 21929  | 21929  | 21929  |
| LBR | Liberia | 39206 | Vahun               | 0.22 | 0.22 | 0.22 | 12919  | 12919  | 12919  |
| LBR | Liberia | 39207 | Voinjama            | 0.82 | 0.85 | 0.88 | 0      | 0      | 0      |
| LBR | Liberia | 39208 | Zorzor              | 0.65 | 0.68 | 0.71 | 8179   | 6502   | 4840   |
| LBR | Liberia | 39209 | Firestone           | 0.85 | 0.85 | 0.85 | 0      | 0      | 0      |
| LBR | Liberia | 39210 | Gibi                | 0.85 | 0.85 | 0.85 | 0      | 0      | 0      |
| LBR | Liberia | 39211 | Kakata              | 0.85 | 0.85 | 0.85 | 0      | 0      | 0      |
| LBR | Liberia | 39212 | Mambah-Kaba         | 0.85 | 0.85 | 0.85 | 0      | 0      | 0      |
| LBR | Liberia | 39213 | Barrobo             | 0.22 | 0.22 | 0.22 | 21813  | 21813  | 21813  |
| LBR | Liberia | 39214 | Pleebo/Sodeken      | 0.22 | 0.22 | 0.22 | 77015  | 77015  | 77015  |
| LBR | Liberia | 39215 | Careysburg          | 0.22 | 0.22 | 0.22 | 13205  | 13205  | 13205  |
| LBR | Liberia | 39216 | Greater Monrovia    | 0.22 | 0.22 | 0.22 | 499053 | 499053 | 499053 |
| LBR | Liberia | 39217 | St Paul River       | 0.22 | 0.22 | 0.22 | 164332 | 164332 | 164332 |
| LBR | Liberia | 39218 | Todee               | 0.22 | 0.22 | 0.22 | 43525  | 43525  | 43525  |
| LBR | Liberia | 39219 | Gbehlageh           | 0.82 | 0.86 | 0.90 | 0      | 0      | 0      |
| LBR | Liberia | 39220 | Saclepea-Mah        | 0.82 | 0.86 | 0.90 | 0      | 0      | 0      |
| LBR | Liberia | 39221 | Sanniquelleh-Mahn   | 0.82 | 0.86 | 0.90 | 0      | 0      | 0      |
| LBR | Liberia | 39222 | Tappita             | 0.82 | 0.86 | 0.90 | 0      | 0      | 0      |
| LBR | Liberia | 39223 | Yarwein-Mehnsohnnoh | 0.82 | 0.86 | 0.90 | 0      | 0      | 0      |
| LBR | Liberia | 39224 | Zoegeh              | 0.82 | 0.86 | 0.90 | 0      | 0      | 0      |
| LBR | Liberia | 39225 | Gbeapo              | 0.22 | 0.22 | 0.22 | 40755  | 40755  | 40755  |
| LBR | Liberia | 39226 | Webbo               | 0.22 | 0.22 | 0.22 | 20428  | 20428  | 20428  |
| LBR | Liberia | 39227 | Morweh              | 0.22 | 0.22 | 0.22 | 17674  | 17674  | 17674  |
| LBR | Liberia | 39228 | Timbo               | 0.22 | 0.22 | 0.22 | 36337  | 36337  | 36337  |
| LBR | Liberia | 39229 | Butaw               | 0.22 | 0.22 | 0.22 | 12830  | 12830  | 12830  |
| LBR | Liberia | 39230 | Dugbe River         | 0.22 | 0.22 | 0.22 | 3821   | 3821   | 3821   |
| LBR | Liberia | 39231 | Greenville          | 0.22 | 0.22 | 0.22 | 11172  | 11172  | 11172  |
| LBR | Liberia | 39232 | Jaedae Jaedepo      | 0.22 | 0.22 | 0.22 | 14683  | 14683  | 14683  |
| LBR | Liberia | 39233 | Juarzon             | 0.22 | 0.22 | 0.22 | 15892  | 15892  | 15892  |
| LBR | Liberia | 39234 | Kpayan              | 0.22 | 0.22 | 0.22 | 7257   | 7257   | 7257   |
| LBR | Liberia | 39235 | Pyneston            | 0.22 | 0.22 | 0.22 | 7229   | 7229   | 7229   |

|     |      |       |            |      |      |      |        |        |        |
|-----|------|-------|------------|------|------|------|--------|--------|--------|
| MLI | Mali | 19366 | Commune 1  | 0.38 | 0.45 | 0.48 | 168035 | 138290 | 125699 |
| MLI | Mali | 19367 | Commune 2  | 0.38 | 0.45 | 0.48 | 79327  | 65285  | 59341  |
| MLI | Mali | 19368 | Commune 3  | 0.38 | 0.45 | 0.48 | 95016  | 78197  | 71077  |
| MLI | Mali | 19369 | Commune 4  | 0.38 | 0.45 | 0.48 | 137071 | 112807 | 102536 |
| MLI | Mali | 19370 | Commune 5  | 0.38 | 0.45 | 0.48 | 179536 | 147755 | 134303 |
| MLI | Mali | 19371 | Commune 6  | 0.38 | 0.45 | 0.48 | 285976 | 235354 | 213925 |
| MLI | Mali | 19372 | Ansongo    | 0.38 | 0.45 | 0.48 | 63378  | 52159  | 47410  |
| MLI | Mali | 19373 | Bourem     | 0.38 | 0.45 | 0.48 | 53917  | 44373  | 40333  |
| MLI | Mali | 19374 | Gao        | 0.38 | 0.45 | 0.48 | 119084 | 98005  | 89081  |
| MLI | Mali | 19375 | Menaka     | 0.38 | 0.45 | 0.48 | 23618  | 19437  | 17667  |
| MLI | Mali | 19376 | Bafoulabe  | 0.70 | 0.76 | 0.85 | 26893  | 10614  | 0      |
| MLI | Mali | 19377 | Diema      | 0.50 | 0.57 | 0.60 | 72121  | 56825  | 49783  |
| MLI | Mali | 19378 | Kayes      | 0.69 | 0.75 | 0.86 | 66875  | 30350  | 0      |
| MLI | Mali | 19379 | Kenieba    | 0.73 | 0.78 | 0.86 | 14673  | 4163   | 0      |
| MLI | Mali | 19380 | Kita       | 0.76 | 0.83 | 0.86 | 17953  | 0      | 0      |
| MLI | Mali | 19381 | Nioro      | 0.50 | 0.57 | 0.60 | 77654  | 61185  | 53602  |
| MLI | Mali | 19382 | Yelimane   | 0.50 | 0.57 | 0.60 | 57948  | 45658  | 39999  |
| MLI | Mali | 19383 | Abeibara   | 0.38 | 0.45 | 0.48 | 4300   | 3539   | 3217   |
| MLI | Mali | 19384 | Kidal      | 0.38 | 0.45 | 0.48 | 13228  | 10886  | 9895   |
| MLI | Mali | 19385 | Tessalit   | 0.38 | 0.45 | 0.48 | 9329   | 7677   | 6978   |
| MLI | Mali | 19386 | Tin-essako | 0.38 | 0.45 | 0.48 | 3848   | 3167   | 2878   |
| MLI | Mali | 19387 | Banamba    | 0.50 | 0.57 | 0.60 | 61501  | 48458  | 42452  |
| MLI | Mali | 19388 | Dioila     | 0.50 | 0.57 | 0.60 | 164645 | 129727 | 113649 |
| MLI | Mali | 19389 | Kangaba    | 0.76 | 0.80 | 0.86 | 4128   | 54     | 0      |
| MLI | Mali | 19390 | Kati       | 0.76 | 0.80 | 0.86 | 44505  | 583    | 0      |
| MLI | Mali | 19391 | Kolokani   | 0.60 | 0.64 | 0.66 | 54921  | 43787  | 37674  |
| MLI | Mali | 19392 | Koulikoro  | 0.50 | 0.57 | 0.60 | 74291  | 58535  | 51280  |
| MLI | Mali | 19393 | Nara       | 0.50 | 0.57 | 0.60 | 80956  | 63786  | 55881  |
| MLI | Mali | 19394 | Bandiagara | 0.50 | 0.57 | 0.60 | 105232 | 82914  | 72638  |
| MLI | Mali | 19395 | Bankass    | 0.50 | 0.57 | 0.60 | 85074  | 67031  | 58724  |
| MLI | Mali | 19396 | Djenne     | 0.50 | 0.57 | 0.60 | 67836  | 53449  | 46825  |
| MLI | Mali | 19397 | Douentza   | 0.50 | 0.57 | 0.60 | 85864  | 67653  | 59269  |
| MLI | Mali | 19398 | Koro       | 0.50 | 0.57 | 0.60 | 118361 | 93259  | 81701  |

|     |            |       |                   |      |      |      |        |        |        |
|-----|------------|-------|-------------------|------|------|------|--------|--------|--------|
| MLI | Mali       | 19399 | Mopti             | 0.50 | 0.57 | 0.60 | 126677 | 99811  | 87441  |
| MLI | Mali       | 19400 | Tenenkou          | 0.50 | 0.57 | 0.60 | 59862  | 47167  | 41321  |
| MLI | Mali       | 19401 | Youwarou          | 0.50 | 0.57 | 0.60 | 34996  | 27574  | 24157  |
| MLI | Mali       | 19402 | Baroueli          | 0.50 | 0.57 | 0.60 | 71241  | 56132  | 49175  |
| MLI | Mali       | 19403 | Bla               | 0.50 | 0.57 | 0.60 | 93726  | 73848  | 64696  |
| MLI | Mali       | 19404 | Ke-macina         | 0.50 | 0.57 | 0.60 | 75747  | 59682  | 52285  |
| MLI | Mali       | 19405 | Niono             | 0.50 | 0.57 | 0.60 | 126214 | 99446  | 87121  |
| MLI | Mali       | 19406 | San               | 0.50 | 0.57 | 0.60 | 112573 | 88698  | 77705  |
| MLI | Mali       | 19407 | Segou             | 0.50 | 0.57 | 0.60 | 231626 | 182502 | 159884 |
| MLI | Mali       | 19408 | Tomnian           | 0.50 | 0.57 | 0.60 | 71349  | 56217  | 49250  |
| MLI | Mali       | 19409 | Bougouni          | 0.50 | 0.57 | 0.60 | 152066 | 119815 | 104966 |
| MLI | Mali       | 19410 | Kadiolo           | 0.50 | 0.58 | 0.61 | 80326  | 60335  | 50881  |
| MLI | Mali       | 19411 | Kolondieba        | 0.50 | 0.58 | 0.61 | 65233  | 48998  | 41320  |
| MLI | Mali       | 19412 | Koutiala          | 0.50 | 0.57 | 0.60 | 191650 | 151004 | 132290 |
| MLI | Mali       | 19413 | Sikasso           | 0.50 | 0.57 | 0.60 | 247261 | 194821 | 170676 |
| MLI | Mali       | 19414 | Yanfolila         | 0.58 | 0.63 | 0.68 | 53599  | 39737  | 27976  |
| MLI | Mali       | 19415 | Yorosso           | 0.50 | 0.57 | 0.60 | 69976  | 55136  | 48302  |
| MLI | Mali       | 19416 | Dire              | 0.38 | 0.45 | 0.48 | 50312  | 41406  | 37636  |
| MLI | Mali       | 19417 | Goundam           | 0.38 | 0.45 | 0.48 | 73449  | 60447  | 54943  |
| MLI | Mali       | 19418 | Gourma-rharous    | 0.38 | 0.45 | 0.48 | 54484  | 44839  | 40757  |
| MLI | Mali       | 19419 | Niafunke          | 0.38 | 0.45 | 0.48 | 85409  | 70290  | 63891  |
| MLI | Mali       | 19420 | Tombouctou        | 0.38 | 0.45 | 0.48 | 62163  | 51159  | 46501  |
| MRT | Mauritania | 19490 | Aoujeft           | 0.02 | 0.04 | 0.04 | 25804  | 25274  | 25072  |
| MRT | Mauritania | 19491 | Atar              | 0.02 | 0.04 | 0.04 | 49511  | 48495  | 48107  |
| MRT | Mauritania | 19492 | Chinguetti        | 0.02 | 0.04 | 0.04 | 8549   | 8374   | 8307   |
| MRT | Mauritania | 19493 | Ouadane           | 0.02 | 0.04 | 0.04 | 4842   | 4743   | 4705   |
| MRT | Mauritania | 19494 | Aftout (barkewol) | 0.02 | 0.04 | 0.04 | 79541  | 77909  | 77285  |
| MRT | Mauritania | 19495 | Boumdeid          | 0.02 | 0.04 | 0.04 | 11124  | 10895  | 10808  |
| MRT | Mauritania | 19496 | Guerou            | 0.02 | 0.04 | 0.04 | 39959  | 39139  | 38825  |
| MRT | Mauritania | 19497 | Kankossa          | 0.02 | 0.04 | 0.04 | 80598  | 78944  | 78312  |
| MRT | Mauritania | 19498 | Kiffa             | 0.02 | 0.04 | 0.04 | 97785  | 95778  | 95011  |
| MRT | Mauritania | 19499 | Aleg              | 0.02 | 0.04 | 0.04 | 86816  | 85034  | 84353  |
| MRT | Mauritania | 19500 | Bababe            | 0.02 | 0.04 | 0.04 | 43144  | 42258  | 41920  |

|     |            |       |                 |      |      |      |        |        |        |
|-----|------------|-------|-----------------|------|------|------|--------|--------|--------|
| MRT | Mauritania | 19501 | Boghe           | 0.02 | 0.04 | 0.04 | 80080  | 78436  | 77808  |
| MRT | Mauritania | 19502 | M Bagne         | 0.02 | 0.04 | 0.04 | 46130  | 45183  | 44821  |
| MRT | Mauritania | 19503 | Magta-lahjar    | 0.02 | 0.04 | 0.04 | 60399  | 59160  | 58686  |
| MRT | Mauritania | 19504 | Nouadhibou      | 0.02 | 0.04 | 0.04 | 99923  | 97872  | 97088  |
| MRT | Mauritania | 19505 | Kaedi           | 0.02 | 0.04 | 0.04 | 106167 | 103988 | 103155 |
| MRT | Mauritania | 19506 | M Bout          | 0.02 | 0.04 | 0.04 | 99270  | 97232  | 96453  |
| MRT | Mauritania | 19507 | Maghama         | 0.02 | 0.04 | 0.04 | 56170  | 55017  | 54576  |
| MRT | Mauritania | 19508 | Monguel         | 0.02 | 0.04 | 0.04 | 41226  | 40380  | 40056  |
| MRT | Mauritania | 19509 | Ould Yenge      | 0.02 | 0.04 | 0.04 | 62724  | 61436  | 60944  |
| MRT | Mauritania | 19510 | Selibaby        | 0.02 | 0.04 | 0.04 | 160411 | 157118 | 155860 |
| MRT | Mauritania | 19511 | Amourj          | 0.02 | 0.04 | 0.04 | 88969  | 87143  | 86445  |
| MRT | Mauritania | 19512 | Bassikounou     | 0.02 | 0.04 | 0.04 | 45641  | 44704  | 44346  |
| MRT | Mauritania | 19513 | Djigueni        | 0.02 | 0.04 | 0.04 | 56048  | 54897  | 54457  |
| MRT | Mauritania | 19514 | Nema            | 0.02 | 0.04 | 0.04 | 80631  | 78976  | 78344  |
| MRT | Mauritania | 19515 | Oualata         | 0.02 | 0.04 | 0.04 | 15511  | 15193  | 15071  |
| MRT | Mauritania | 19516 | Timbedra        | 0.02 | 0.04 | 0.04 | 72131  | 70650  | 70084  |
| MRT | Mauritania | 19517 | Aioun Al Atrous | 0.02 | 0.04 | 0.04 | 59251  | 58035  | 57570  |
| MRT | Mauritania | 19518 | Kobenni         | 0.02 | 0.04 | 0.04 | 90786  | 88923  | 88211  |
| MRT | Mauritania | 19519 | Tamchekket      | 0.02 | 0.04 | 0.04 | 39465  | 38655  | 38345  |
| MRT | Mauritania | 19520 | Tintane         | 0.02 | 0.04 | 0.04 | 81012  | 79350  | 78714  |
| MRT | Mauritania | 19521 | Akjoujt         | 0.02 | 0.04 | 0.04 | 14965  | 14658  | 14541  |
| MRT | Mauritania | 19522 | Nouakchott      | 0.02 | 0.04 | 0.04 | 771418 | 755585 | 749532 |
| MRT | Mauritania | 19523 | Moudjeria       | 0.02 | 0.04 | 0.04 | 46914  | 45951  | 45583  |
| MRT | Mauritania | 19524 | Tichit          | 0.02 | 0.04 | 0.04 | 6130   | 6004   | 5956   |
| MRT | Mauritania | 19525 | Tidjikja        | 0.02 | 0.04 | 0.04 | 45053  | 44128  | 43775  |
| MRT | Mauritania | 19526 | Bir Mogrein     | 0.02 | 0.04 | 0.04 | 3513   | 3441   | 3414   |
| MRT | Mauritania | 19527 | F Derik         | 0.02 | 0.04 | 0.04 | 7219   | 7071   | 7014   |
| MRT | Mauritania | 19528 | Zouerate        | 0.02 | 0.04 | 0.04 | 41736  | 40879  | 40552  |
| MRT | Mauritania | 19529 | Boutilimit      | 0.02 | 0.04 | 0.04 | 72552  | 71063  | 70493  |
| MRT | Mauritania | 19530 | Keur Massene    | 0.02 | 0.04 | 0.04 | 36950  | 36191  | 35901  |
| MRT | Mauritania | 19531 | Mederdra        | 0.02 | 0.04 | 0.04 | 39852  | 39034  | 38721  |
| MRT | Mauritania | 19532 | Ouad Naga       | 0.02 | 0.04 | 0.04 | 34547  | 33838  | 33567  |
| MRT | Mauritania | 19533 | R Kiz           | 0.02 | 0.04 | 0.04 | 90317  | 88463  | 87754  |

|     |            |       |                  |      |      |      |        |        |        |
|-----|------------|-------|------------------|------|------|------|--------|--------|--------|
| MRT | Mauritania | 19534 | Rosso            | 0.02 | 0.04 | 0.04 | 72018  | 70540  | 69975  |
| NER | Niger      | 22551 | Arlit            | 0.31 | 0.32 | 0.33 | 101365 | 98765  | 97723  |
| NER | Niger      | 22552 | Bilma            | 0.31 | 0.32 | 0.33 | 16850  | 16417  | 16244  |
| NER | Niger      | 22553 | Tchighozerine    | 0.31 | 0.32 | 0.33 | 209061 | 203699 | 201550 |
| NER | Niger      | 22554 | Diffa            | 0.31 | 0.32 | 0.33 | 110494 | 107660 | 106524 |
| NER | Niger      | 22555 | Maine-soroa      | 0.31 | 0.32 | 0.33 | 104400 | 101723 | 100649 |
| NER | Niger      | 22556 | N'guigmi         | 0.31 | 0.32 | 0.33 | 49487  | 48217  | 47709  |
| NER | Niger      | 22557 | Birni N'gaoure   | 0.31 | 0.32 | 0.33 | 230672 | 224755 | 222384 |
| NER | Niger      | 22558 | Dogondoutchi     | 0.31 | 0.32 | 0.33 | 450316 | 438766 | 434137 |
| NER | Niger      | 22559 | Dosso            | 0.31 | 0.32 | 0.33 | 268965 | 262066 | 259302 |
| NER | Niger      | 22560 | Gaya             | 0.31 | 0.32 | 0.33 | 214023 | 208534 | 206334 |
| NER | Niger      | 22561 | Loga             | 0.31 | 0.32 | 0.33 | 170171 | 165806 | 164057 |
| NER | Niger      | 22562 | Aguie            | 0.31 | 0.32 | 0.33 | 307784 | 299890 | 296726 |
| NER | Niger      | 22563 | Dakoro           | 0.31 | 0.32 | 0.33 | 343318 | 334513 | 330983 |
| NER | Niger      | 22564 | Guidan Roumji    | 0.31 | 0.32 | 0.33 | 285581 | 278256 | 275320 |
| NER | Niger      | 22565 | Madarounfa       | 0.31 | 0.32 | 0.33 | 452074 | 440479 | 435832 |
| NER | Niger      | 22566 | Mayahi           | 0.31 | 0.32 | 0.33 | 330978 | 322489 | 319087 |
| NER | Niger      | 22567 | Tessaoua         | 0.31 | 0.32 | 0.33 | 320467 | 312248 | 308954 |
| NER | Niger      | 22568 | Commune 1        | 0.31 | 0.32 | 0.33 | 380416 | 370659 | 366749 |
| NER | Niger      | 22569 | Commune 2        | 0.31 | 0.32 | 0.33 | 354260 | 345174 | 341533 |
| NER | Niger      | 22570 | Commune 3        | 0.31 | 0.32 | 0.33 | 121942 | 118814 | 117561 |
| NER | Niger      | 22571 | Birni N'konni    | 0.31 | 0.32 | 0.33 | 306713 | 298847 | 295694 |
| NER | Niger      | 22572 | Bouza            | 0.31 | 0.32 | 0.33 | 238777 | 232653 | 230198 |
| NER | Niger      | 22573 | Illela           | 0.31 | 0.32 | 0.33 | 228338 | 222482 | 220134 |
| NER | Niger      | 22574 | Keita            | 0.31 | 0.32 | 0.33 | 211544 | 206119 | 203944 |
| NER | Niger      | 22575 | Madaoua          | 0.31 | 0.32 | 0.33 | 220842 | 215178 | 212908 |
| NER | Niger      | 22576 | Tahoua           | 0.31 | 0.32 | 0.33 | 280358 | 273168 | 270286 |
| NER | Niger      | 22577 | Tchin Tabaradene | 0.31 | 0.32 | 0.33 | 161415 | 157276 | 155616 |
| NER | Niger      | 22578 | Filingue         | 0.31 | 0.32 | 0.33 | 342111 | 333337 | 329820 |
| NER | Niger      | 22579 | Kollo            | 0.31 | 0.32 | 0.33 | 258879 | 252239 | 249578 |
| NER | Niger      | 22580 | Ouallam          | 0.31 | 0.32 | 0.33 | 238867 | 232740 | 230285 |
| NER | Niger      | 22581 | Say              | 0.31 | 0.32 | 0.33 | 233848 | 227850 | 225446 |
| NER | Niger      | 22582 | Tera             | 0.31 | 0.32 | 0.33 | 359474 | 350254 | 346559 |

|     |         |       |             |      |      |      |        |        |        |
|-----|---------|-------|-------------|------|------|------|--------|--------|--------|
| NER | Niger   | 22583 | Tillaberi   | 0.31 | 0.32 | 0.33 | 187500 | 182691 | 180764 |
| NER | Niger   | 22584 | Goure       | 0.31 | 0.32 | 0.33 | 200195 | 195060 | 193002 |
| NER | Niger   | 22585 | Magaria     | 0.31 | 0.32 | 0.33 | 399297 | 389056 | 384951 |
| NER | Niger   | 22586 | Matamey     | 0.31 | 0.32 | 0.33 | 218189 | 212593 | 210350 |
| NER | Niger   | 22587 | Miria       | 0.31 | 0.32 | 0.33 | 683437 | 665909 | 658883 |
| NER | Niger   | 22588 | Tanout      | 0.31 | 0.32 | 0.33 | 247130 | 240792 | 238251 |
| NGA | Nigeria | 22589 | Aba         | 0.15 | 0.15 | 0.15 | 449993 | 449993 | 449993 |
| NGA | Nigeria | 22590 | Afikpo      | 0.15 | 0.15 | 0.15 | 131509 | 131509 | 131509 |
| NGA | Nigeria | 22591 | Afikposo    | 0.15 | 0.15 | 0.15 | 132841 | 132841 | 132841 |
| NGA | Nigeria | 22592 | Arochukw    | 0.15 | 0.15 | 0.15 | 135145 | 135145 | 135145 |
| NGA | Nigeria | 22593 | Bende       | 0.15 | 0.15 | 0.15 | 159461 | 159461 | 159461 |
| NGA | Nigeria | 22594 | Ikwuano     | 0.15 | 0.15 | 0.15 | 118249 | 118249 | 118249 |
| NGA | Nigeria | 22595 | Isiala-n    | 0.15 | 0.15 | 0.15 | 172776 | 172776 | 172776 |
| NGA | Nigeria | 22596 | Isuikwua    | 0.15 | 0.15 | 0.15 | 197923 | 197923 | 197923 |
| NGA | Nigeria | 22597 | Obioma-n    | 0.15 | 0.15 | 0.15 | 457677 | 457677 | 457677 |
| NGA | Nigeria | 22598 | Ohafia Abia | 0.15 | 0.15 | 0.15 | 197728 | 197728 | 197728 |
| NGA | Nigeria | 22599 | Ohaozara    | 0.15 | 0.15 | 0.15 | 194942 | 194942 | 194942 |
| NGA | Nigeria | 22600 | Onicha      | 0.15 | 0.15 | 0.15 | 164838 | 164838 | 164838 |
| NGA | Nigeria | 22601 | Ukwa        | 0.15 | 0.15 | 0.15 | 84892  | 84892  | 84892  |
| NGA | Nigeria | 22602 | Ukwaeast    | 0.15 | 0.15 | 0.15 | 143303 | 143303 | 143303 |
| NGA | Nigeria | 22603 | Umuahia     | 0.15 | 0.15 | 0.15 | 337953 | 337953 | 337953 |
| NGA | Nigeria | 22604 | Fufore      | 0.20 | 0.27 | 0.30 | 138110 | 121237 | 114353 |
| NGA | Nigeria | 22605 | Ganye       | 0.20 | 0.27 | 0.30 | 158421 | 139066 | 131170 |
| NGA | Nigeria | 22606 | Gombi       | 0.20 | 0.27 | 0.30 | 98093  | 86108  | 81219  |
| NGA | Nigeria | 22607 | Guyuk       | 0.20 | 0.27 | 0.30 | 123501 | 108412 | 102256 |
| NGA | Nigeria | 22608 | Hong        | 0.20 | 0.27 | 0.30 | 142564 | 125147 | 118041 |
| NGA | Nigeria | 22609 | Jada        | 0.20 | 0.27 | 0.30 | 98458  | 86429  | 81521  |
| NGA | Nigeria | 22610 | Madagali    | 0.20 | 0.27 | 0.30 | 93907  | 82433  | 77753  |
| NGA | Nigeria | 22611 | Maiha       | 0.20 | 0.27 | 0.30 | 100432 | 88162  | 83156  |
| NGA | Nigeria | 22612 | Mayo-bel    | 0.20 | 0.27 | 0.30 | 110622 | 97106  | 91593  |
| NGA | Nigeria | 22613 | Michika     | 0.20 | 0.27 | 0.30 | 99625  | 87453  | 82487  |
| NGA | Nigeria | 22614 | Mubi        | 0.20 | 0.27 | 0.30 | 176467 | 154907 | 146111 |
| NGA | Nigeria | 22615 | Numan       | 0.20 | 0.27 | 0.30 | 302867 | 265864 | 250768 |

|     |         |       |          |      |      |      |        |        |        |
|-----|---------|-------|----------|------|------|------|--------|--------|--------|
| NGA | Nigeria | 22616 | Shelleng | 0.20 | 0.27 | 0.30 | 125401 | 110080 | 103830 |
| NGA | Nigeria | 22617 | Song     | 0.20 | 0.27 | 0.30 | 260730 | 228876 | 215880 |
| NGA | Nigeria | 22618 | Yola     | 0.20 | 0.27 | 0.30 | 355150 | 311759 | 294057 |
| NGA | Nigeria | 22619 | Abak     | 0.56 | 0.65 | 0.76 | 32699  | 19995  | 5429   |
| NGA | Nigeria | 22620 | Eket     | 0.56 | 0.65 | 0.76 | 51360  | 31406  | 8527   |
| NGA | Nigeria | 22621 | Ekpe-ata | 0.56 | 0.65 | 0.76 | 32628  | 19952  | 5417   |
| NGA | Nigeria | 22622 | Essien-u | 0.56 | 0.65 | 0.76 | 49305  | 30149  | 8186   |
| NGA | Nigeria | 22623 | Etimekpo | 0.56 | 0.65 | 0.76 | 36351  | 22228  | 6035   |
| NGA | Nigeria | 22624 | Etinan   | 0.56 | 0.65 | 0.76 | 38499  | 23542  | 6392   |
| NGA | Nigeria | 22625 | Ikono    | 0.56 | 0.65 | 0.76 | 48703  | 29781  | 8086   |
| NGA | Nigeria | 22626 | Ikot-aba | 0.56 | 0.65 | 0.76 | 51199  | 31307  | 8501   |
| NGA | Nigeria | 22627 | Ikot-ekp | 0.56 | 0.65 | 0.76 | 77558  | 47426  | 12877  |
| NGA | Nigeria | 22628 | Ini      | 0.56 | 0.65 | 0.76 | 34859  | 21316  | 5788   |
| NGA | Nigeria | 22629 | Itu      | 0.56 | 0.65 | 0.76 | 94972  | 58074  | 15768  |
| NGA | Nigeria | 22630 | Mbo      | 0.56 | 0.65 | 0.76 | 33929  | 20747  | 5633   |
| NGA | Nigeria | 22631 | Mkpat-en | 0.56 | 0.65 | 0.76 | 40233  | 24602  | 6680   |
| NGA | Nigeria | 22632 | Nsit-ibo | 0.56 | 0.65 | 0.76 | 51249  | 31338  | 8509   |
| NGA | Nigeria | 22633 | Nsit-ubi | 0.56 | 0.65 | 0.76 | 35653  | 21801  | 5920   |
| NGA | Nigeria | 22634 | Okobo    | 0.56 | 0.65 | 0.76 | 47390  | 28979  | 7868   |
| NGA | Nigeria | 22635 | Onna     | 0.56 | 0.65 | 0.76 | 41093  | 25128  | 6823   |
| NGA | Nigeria | 22636 | Oron     | 0.56 | 0.65 | 0.76 | 56807  | 34737  | 9432   |
| NGA | Nigeria | 22637 | Oruk-ana | 0.56 | 0.65 | 0.76 | 47970  | 29333  | 7965   |
| NGA | Nigeria | 22638 | Ukanafun | 0.56 | 0.65 | 0.76 | 40601  | 24827  | 6741   |
| NGA | Nigeria | 22639 | Uquoiben | 0.56 | 0.65 | 0.76 | 46850  | 28648  | 7779   |
| NGA | Nigeria | 22640 | Uruan    | 0.56 | 0.65 | 0.76 | 64364  | 39358  | 10687  |
| NGA | Nigeria | 22641 | Urueoffo | 0.56 | 0.65 | 0.76 | 20046  | 12258  | 3328   |
| NGA | Nigeria | 22642 | Uyo      | 0.56 | 0.65 | 0.76 | 126819 | 77548  | 21056  |
| NGA | Nigeria | 22643 | Aguata   | 0.20 | 0.28 | 0.32 | 319952 | 276319 | 256630 |
| NGA | Nigeria | 22644 | Anambra  | 0.20 | 0.28 | 0.32 | 117868 | 101794 | 94540  |
| NGA | Nigeria | 22645 | Anaocha  | 0.20 | 0.28 | 0.32 | 243179 | 210016 | 195051 |
| NGA | Nigeria | 22646 | Awkanort | 0.20 | 0.28 | 0.32 | 124405 | 107440 | 99784  |
| NGA | Nigeria | 22647 | Awkasout | 0.20 | 0.28 | 0.32 | 207411 | 179125 | 166362 |
| NGA | Nigeria | 22648 | Idemili  | 0.20 | 0.28 | 0.32 | 558269 | 482135 | 447781 |



|     |         |       |           |      |      |      |        |        |        |
|-----|---------|-------|-----------|------|------|------|--------|--------|--------|
| NGA | Nigeria | 22649 | Ihiala    | 0.20 | 0.28 | 0.32 | 254891 | 220131 | 204445 |
| NGA | Nigeria | 22650 | Njikoka   | 0.20 | 0.28 | 0.32 | 245417 | 211948 | 196846 |
| NGA | Nigeria | 22651 | Nnewinort | 0.20 | 0.28 | 0.32 | 185078 | 159838 | 148449 |
| NGA | Nigeria | 22652 | Nnewisou  | 0.20 | 0.28 | 0.32 | 211025 | 182246 | 169260 |
| NGA | Nigeria | 22653 | Ogbaru    | 0.20 | 0.28 | 0.32 | 61775  | 53350  | 49549  |
| NGA | Nigeria | 22654 | Onitshan  | 0.20 | 0.28 | 0.32 | 320050 | 276403 | 256708 |
| NGA | Nigeria | 22655 | Orumbano  | 0.20 | 0.28 | 0.32 | 193325 | 166961 | 155064 |
| NGA | Nigeria | 22656 | Orumbaso  | 0.20 | 0.28 | 0.32 | 147830 | 127669 | 118572 |
| NGA | Nigeria | 22657 | Oyi       | 0.20 | 0.28 | 0.32 | 299751 | 258872 | 240427 |
| NGA | Nigeria | 22658 | Akko      | 0.13 | 0.13 | 0.13 | 248444 | 248444 | 248444 |
| NGA | Nigeria | 22659 | Alkaleri  | 0.20 | 0.28 | 0.32 | 346747 | 299342 | 277908 |
| NGA | Nigeria | 22660 | Balanga   | 0.13 | 0.13 | 0.13 | 188504 | 188504 | 188504 |
| NGA | Nigeria | 22661 | Bauchi    | 0.20 | 0.28 | 0.32 | 459766 | 396910 | 368489 |
| NGA | Nigeria | 22662 | Billiri   | 0.13 | 0.13 | 0.13 | 176591 | 176591 | 176591 |
| NGA | Nigeria | 22663 | Darazo    | 0.20 | 0.28 | 0.32 | 193854 | 167352 | 155369 |
| NGA | Nigeria | 22664 | Dass      | 0.20 | 0.28 | 0.32 | 63221  | 54578  | 50670  |
| NGA | Nigeria | 22665 | Dukku     | 0.13 | 0.13 | 0.13 | 179970 | 179970 | 179970 |
| NGA | Nigeria | 22666 | Gamawa    | 0.20 | 0.28 | 0.32 | 214933 | 185549 | 172263 |
| NGA | Nigeria | 22667 | Gamjuwa   | 0.20 | 0.28 | 0.32 | 214059 | 184794 | 171562 |
| NGA | Nigeria | 22668 | Gombe     | 0.13 | 0.13 | 0.13 | 424228 | 424228 | 424228 |
| NGA | Nigeria | 22669 | Itas/gad  | 0.20 | 0.28 | 0.32 | 135864 | 117289 | 108891 |
| NGA | Nigeria | 22670 | Jama'are  | 0.20 | 0.28 | 0.32 | 100123 | 86435  | 80246  |
| NGA | Nigeria | 22671 | Kaltungo  | 0.13 | 0.13 | 0.13 | 251620 | 251620 | 251620 |
| NGA | Nigeria | 22672 | Katagum   | 0.20 | 0.28 | 0.32 | 233560 | 201629 | 187192 |
| NGA | Nigeria | 22673 | Misau     | 0.20 | 0.28 | 0.32 | 309644 | 267312 | 248171 |
| NGA | Nigeria | 22674 | Nafada/b  | 0.13 | 0.13 | 0.13 | 357150 | 357150 | 357150 |
| NGA | Nigeria | 22675 | Ningi     | 0.20 | 0.28 | 0.32 | 346946 | 299514 | 278068 |
| NGA | Nigeria | 22676 | Shira     | 0.20 | 0.28 | 0.32 | 306235 | 264368 | 245438 |
| NGA | Nigeria | 22677 | Tafawa-b  | 0.20 | 0.28 | 0.32 | 185889 | 160475 | 148984 |
| NGA | Nigeria | 22678 | Toro      | 0.20 | 0.28 | 0.32 | 285065 | 246093 | 228472 |
| NGA | Nigeria | 22679 | Yamaltu/  | 0.13 | 0.13 | 0.13 | 228703 | 228703 | 228703 |
| NGA | Nigeria | 22680 | Zaki      | 0.20 | 0.28 | 0.32 | 142395 | 122928 | 114126 |
| NGA | Nigeria | 22681 | Ado       | 0.20 | 0.27 | 0.30 | 162360 | 142524 | 134431 |

|     |         |       |                 |      |      |      |        |        |        |
|-----|---------|-------|-----------------|------|------|------|--------|--------|--------|
| NGA | Nigeria | 22682 | Apa             | 0.20 | 0.27 | 0.30 | 142396 | 124998 | 117901 |
| NGA | Nigeria | 22683 | Buruku          | 0.20 | 0.27 | 0.30 | 172264 | 151217 | 142631 |
| NGA | Nigeria | 22684 | Gboko           | 0.20 | 0.27 | 0.30 | 378809 | 332528 | 313647 |
| NGA | Nigeria | 22685 | Guma            | 0.20 | 0.27 | 0.30 | 129007 | 113246 | 106816 |
| NGA | Nigeria | 22686 | Gwer            | 0.20 | 0.27 | 0.30 | 124131 | 108965 | 102778 |
| NGA | Nigeria | 22687 | Gwerwest        | 0.20 | 0.27 | 0.30 | 92128  | 80873  | 76281  |
| NGA | Nigeria | 22688 | Katsina (benue) | 0.20 | 0.27 | 0.30 | 296789 | 260529 | 245735 |
| NGA | Nigeria | 22689 | Konshish        | 0.20 | 0.27 | 0.30 | 201008 | 176450 | 166431 |
| NGA | Nigeria | 22690 | Kwande          | 0.20 | 0.27 | 0.30 | 210909 | 185141 | 174629 |
| NGA | Nigeria | 22691 | Makurdi         | 0.20 | 0.27 | 0.30 | 283901 | 249216 | 235065 |
| NGA | Nigeria | 22692 | Ogbadibo        | 0.20 | 0.27 | 0.30 | 86002  | 75495  | 71208  |
| NGA | Nigeria | 22693 | Oju             | 0.20 | 0.27 | 0.30 | 218698 | 191979 | 181078 |
| NGA | Nigeria | 22694 | Okpokwu         | 0.20 | 0.27 | 0.30 | 127826 | 112209 | 105838 |
| NGA | Nigeria | 22695 | Oturkpo         | 0.20 | 0.27 | 0.30 | 302447 | 265495 | 250420 |
| NGA | Nigeria | 22696 | Ukum            | 0.20 | 0.27 | 0.30 | 151814 | 133266 | 125699 |
| NGA | Nigeria | 22697 | Ushongo         | 0.20 | 0.27 | 0.30 | 131122 | 115102 | 108566 |
| NGA | Nigeria | 22698 | Vandeiky        | 0.20 | 0.27 | 0.30 | 175816 | 154336 | 145572 |
| NGA | Nigeria | 22699 | Askira/u        | 0.20 | 0.27 | 0.30 | 115106 | 101043 | 95306  |
| NGA | Nigeria | 22700 | Bama            | 0.20 | 0.27 | 0.30 | 282346 | 247850 | 233777 |
| NGA | Nigeria | 22701 | Biu             | 0.20 | 0.27 | 0.30 | 279489 | 245343 | 231412 |
| NGA | Nigeria | 22702 | Dambo           | 0.20 | 0.27 | 0.30 | 250098 | 219542 | 207076 |
| NGA | Nigeria | 22703 | Dikwa           | 0.20 | 0.27 | 0.30 | 75570  | 66338  | 62571  |
| NGA | Nigeria | 22704 | Gwoza           | 0.20 | 0.27 | 0.30 | 167644 | 147162 | 138806 |
| NGA | Nigeria | 22705 | Kaga            | 0.20 | 0.27 | 0.30 | 194781 | 170984 | 161275 |
| NGA | Nigeria | 22706 | Konduga         | 0.20 | 0.27 | 0.30 | 217968 | 191338 | 180474 |
| NGA | Nigeria | 22707 | Kukawa          | 0.20 | 0.27 | 0.30 | 269467 | 236545 | 223114 |
| NGA | Nigeria | 22708 | Maidugur        | 0.20 | 0.27 | 0.30 | 671837 | 589756 | 556269 |
| NGA | Nigeria | 22709 | Mobbar          | 0.20 | 0.27 | 0.30 | 291111 | 255544 | 241034 |
| NGA | Nigeria | 22710 | Monguno         | 0.20 | 0.27 | 0.30 | 178657 | 156829 | 147924 |
| NGA | Nigeria | 22711 | Ngala           | 0.20 | 0.27 | 0.30 | 241843 | 212296 | 200242 |
| NGA | Nigeria | 22712 | Shani           | 0.20 | 0.27 | 0.30 | 176401 | 154849 | 146057 |
| NGA | Nigeria | 22713 | Abi             | 0.56 | 0.65 | 0.76 | 78056  | 47730  | 12960  |
| NGA | Nigeria | 22714 | Akamkpa         | 0.56 | 0.65 | 0.76 | 46792  | 28613  | 7769   |

|     |         |       |            |      |      |      |        |        |        |
|-----|---------|-------|------------|------|------|------|--------|--------|--------|
| NGA | Nigeria | 22715 | Akpabuyo   | 0.56 | 0.65 | 0.76 | 77869  | 47616  | 12929  |
| NGA | Nigeria | 22716 | Biase      | 0.56 | 0.65 | 0.76 | 57048  | 34884  | 9472   |
| NGA | Nigeria | 22717 | Boki       | 0.56 | 0.65 | 0.76 | 51122  | 31261  | 8488   |
| NGA | Nigeria | 22718 | Calabar    | 0.56 | 0.65 | 0.76 | 134928 | 82507  | 22402  |
| NGA | Nigeria | 22719 | Ikom       | 0.56 | 0.65 | 0.76 | 84953  | 51947  | 14105  |
| NGA | Nigeria | 22720 | Obanliku   | 0.56 | 0.65 | 0.76 | 31482  | 19251  | 5227   |
| NGA | Nigeria | 22721 | Obubra     | 0.56 | 0.65 | 0.76 | 48379  | 29583  | 8032   |
| NGA | Nigeria | 22722 | Obudu      | 0.56 | 0.65 | 0.76 | 43495  | 26597  | 7222   |
| NGA | Nigeria | 22723 | Odukpani   | 0.56 | 0.65 | 0.76 | 72777  | 44502  | 12083  |
| NGA | Nigeria | 22724 | Ogoja      | 0.56 | 0.65 | 0.76 | 85978  | 52575  | 14275  |
| NGA | Nigeria | 22725 | Yakurr     | 0.56 | 0.65 | 0.76 | 59128  | 36156  | 9817   |
| NGA | Nigeria | 22726 | Yala Cross | 0.56 | 0.65 | 0.76 | 50652  | 30973  | 8410   |
| NGA | Nigeria | 22727 | Aniochan   | 0.20 | 0.28 | 0.32 | 79993  | 69084  | 64162  |
| NGA | Nigeria | 22728 | Aniochas   | 0.20 | 0.28 | 0.32 | 105491 | 91105  | 84613  |
| NGA | Nigeria | 22729 | Bomadi     | 0.20 | 0.28 | 0.32 | 88367  | 76316  | 70878  |
| NGA | Nigeria | 22730 | Burutu     | 0.20 | 0.28 | 0.32 | 189562 | 163711 | 152046 |
| NGA | Nigeria | 22731 | Ethiopee   | 0.20 | 0.28 | 0.32 | 86243  | 74482  | 69175  |
| NGA | Nigeria | 22732 | Ethiopew   | 0.20 | 0.28 | 0.32 | 140317 | 121181 | 112547 |
| NGA | Nigeria | 22733 | Ikanorth   | 0.20 | 0.28 | 0.32 | 159585 | 137822 | 128001 |
| NGA | Nigeria | 22734 | Ikasouth   | 0.20 | 0.28 | 0.32 | 101831 | 87944  | 81677  |
| NGA | Nigeria | 22735 | Isokonor   | 0.20 | 0.28 | 0.32 | 80970  | 69928  | 64945  |
| NGA | Nigeria | 22736 | Isokosou   | 0.20 | 0.28 | 0.32 | 177713 | 153477 | 142541 |
| NGA | Nigeria | 22737 | Ndokwaea   | 0.20 | 0.28 | 0.32 | 105307 | 90946  | 84466  |
| NGA | Nigeria | 22738 | Ndokwawe   | 0.20 | 0.28 | 0.32 | 174260 | 150495 | 139772 |
| NGA | Nigeria | 22739 | Okpe       | 0.20 | 0.28 | 0.32 | 287825 | 248573 | 230861 |
| NGA | Nigeria | 22740 | Oshimill   | 0.20 | 0.28 | 0.32 | 178553 | 154203 | 143215 |
| NGA | Nigeria | 22741 | Sapele     | 0.20 | 0.28 | 0.32 | 182035 | 157210 | 146008 |
| NGA | Nigeria | 22742 | Ughelino   | 0.20 | 0.28 | 0.32 | 314454 | 271570 | 252220 |
| NGA | Nigeria | 22743 | Ugheliso   | 0.20 | 0.28 | 0.32 | 169593 | 146465 | 136028 |
| NGA | Nigeria | 22744 | Warrinorth | 0.20 | 0.28 | 0.32 | 115609 | 99843  | 92729  |
| NGA | Nigeria | 22745 | Warrisouth | 0.20 | 0.28 | 0.32 | 419746 | 362503 | 336673 |
| NGA | Nigeria | 22746 | Akoko-ed   | 0.20 | 0.27 | 0.30 | 191041 | 167701 | 158178 |
| NGA | Nigeria | 22747 | Esacent    | 0.20 | 0.27 | 0.30 | 111554 | 97925  | 92365  |

|     |         |       |                |      |      |      |        |        |        |
|-----|---------|-------|----------------|------|------|------|--------|--------|--------|
| NGA | Nigeria | 22748 | Esannort       | 0.20 | 0.27 | 0.30 | 102140 | 89661  | 84570  |
| NGA | Nigeria | 22749 | Esansout       | 0.20 | 0.27 | 0.30 | 143493 | 125962 | 118809 |
| NGA | Nigeria | 22750 | Esanwest       | 0.20 | 0.27 | 0.30 | 126424 | 110978 | 104676 |
| NGA | Nigeria | 22751 | Etsakoea       | 0.20 | 0.27 | 0.30 | 167619 | 147140 | 138785 |
| NGA | Nigeria | 22752 | Etsakowe       | 0.20 | 0.27 | 0.30 | 213435 | 187359 | 176720 |
| NGA | Nigeria | 22753 | Oredo Edo      | 0.20 | 0.27 | 0.30 | 965075 | 847167 | 799064 |
| NGA | Nigeria | 22754 | Orhionmw       | 0.20 | 0.27 | 0.30 | 260355 | 228546 | 215569 |
| NGA | Nigeria | 22755 | Ovianort       | 0.20 | 0.27 | 0.30 | 118548 | 104065 | 98156  |
| NGA | Nigeria | 22756 | Oviasouth-west | 0.20 | 0.27 | 0.30 | 127020 | 111501 | 105170 |
| NGA | Nigeria | 22757 | Owanwest       | 0.20 | 0.27 | 0.30 | 176289 | 154751 | 145964 |
| NGA | Nigeria | 22758 | Abakalik       | 0.15 | 0.15 | 0.15 | 320903 | 320903 | 320903 |
| NGA | Nigeria | 22759 | Awgu           | 0.15 | 0.15 | 0.15 | 286160 | 286160 | 286160 |
| NGA | Nigeria | 22760 | Enugusou       | 0.15 | 0.15 | 0.15 | 694015 | 694015 | 694015 |
| NGA | Nigeria | 22761 | Ezeagu         | 0.15 | 0.15 | 0.15 | 151239 | 151239 | 151239 |
| NGA | Nigeria | 22762 | Ezza           | 0.15 | 0.15 | 0.15 | 193557 | 193557 | 193557 |
| NGA | Nigeria | 22763 | Igbo-eti       | 0.15 | 0.15 | 0.15 | 189654 | 189654 | 189654 |
| NGA | Nigeria | 22764 | Igbo-eze       | 0.15 | 0.15 | 0.15 | 298493 | 298493 | 298493 |
| NGA | Nigeria | 22765 | Ikwo           | 0.15 | 0.15 | 0.15 | 193921 | 193921 | 193921 |
| NGA | Nigeria | 22766 | Ishielu        | 0.15 | 0.15 | 0.15 | 101767 | 101767 | 101767 |
| NGA | Nigeria | 22767 | Isi-uzo        | 0.15 | 0.15 | 0.15 | 279338 | 279338 | 279338 |
| NGA | Nigeria | 22768 | Izzi           | 0.15 | 0.15 | 0.15 | 191656 | 191656 | 191656 |
| NGA | Nigeria | 22769 | Nkanu          | 0.15 | 0.15 | 0.15 | 280928 | 280928 | 280928 |
| NGA | Nigeria | 22770 | Nsukka         | 0.15 | 0.15 | 0.15 | 291508 | 291508 | 291508 |
| NGA | Nigeria | 22771 | Ohaukwu        | 0.15 | 0.15 | 0.15 | 150842 | 150842 | 150842 |
| NGA | Nigeria | 22772 | Oji-river      | 0.15 | 0.15 | 0.15 | 95805  | 95805  | 95805  |
| NGA | Nigeria | 22773 | Udi            | 0.15 | 0.15 | 0.15 | 206096 | 206096 | 206096 |
| NGA | Nigeria | 22774 | Uzo-uwani      | 0.15 | 0.15 | 0.15 | 75697  | 75697  | 75697  |
| NGA | Nigeria | 22775 | Abaji          | 0.20 | 0.27 | 0.30 | 32315  | 28367  | 26757  |
| NGA | Nigeria | 22776 | Abujamun       | 0.20 | 0.27 | 0.30 | 702959 | 617074 | 582036 |
| NGA | Nigeria | 22777 | Gwagwala       | 0.20 | 0.27 | 0.30 | 179634 | 157687 | 148733 |
| NGA | Nigeria | 22778 | Kuje           | 0.20 | 0.27 | 0.30 | 72521  | 63661  | 60046  |
| NGA | Nigeria | 22779 | Aboh-mba       | 0.20 | 0.28 | 0.32 | 123252 | 106443 | 98859  |
| NGA | Nigeria | 22780 | Ahizu-mb       | 0.20 | 0.28 | 0.32 | 92224  | 79647  | 73972  |

|     |         |       |          |      |      |      |        |        |        |
|-----|---------|-------|----------|------|------|------|--------|--------|--------|
| NGA | Nigeria | 22781 | Ehime-mb | 0.20 | 0.28 | 0.32 | 107167 | 92552  | 85957  |
| NGA | Nigeria | 22782 | Ezinihit | 0.20 | 0.28 | 0.32 | 143354 | 123804 | 114983 |
| NGA | Nigeria | 22783 | Ideato   | 0.20 | 0.28 | 0.32 | 122020 | 105380 | 97871  |
| NGA | Nigeria | 22784 | Ideatono | 0.20 | 0.28 | 0.32 | 156160 | 134864 | 125254 |
| NGA | Nigeria | 22785 | Ihitte/u | 0.20 | 0.28 | 0.32 | 171911 | 148466 | 137888 |
| NGA | Nigeria | 22786 | Ikeduru  | 0.20 | 0.28 | 0.32 | 105398 | 91024  | 84538  |
| NGA | Nigeria | 22787 | Isialamb | 0.20 | 0.28 | 0.32 | 181586 | 156823 | 145648 |
| NGA | Nigeria | 22788 | Isu      | 0.20 | 0.28 | 0.32 | 100967 | 87198  | 80985  |
| NGA | Nigeria | 22789 | Mbaitoli | 0.20 | 0.28 | 0.32 | 169228 | 146150 | 135736 |
| NGA | Nigeria | 22790 | Ngor-okp | 0.20 | 0.28 | 0.32 | 148264 | 128045 | 118921 |
| NGA | Nigeria | 22791 | Nkwerre  | 0.20 | 0.28 | 0.32 | 198051 | 171042 | 158854 |
| NGA | Nigeria | 22792 | Obowo    | 0.20 | 0.28 | 0.32 | 120406 | 103986 | 96577  |
| NGA | Nigeria | 22793 | Oguta    | 0.20 | 0.28 | 0.32 | 58811  | 50790  | 47171  |
| NGA | Nigeria | 22794 | Ohaji/eg | 0.20 | 0.28 | 0.32 | 159873 | 138070 | 128232 |
| NGA | Nigeria | 22795 | Okigwe   | 0.20 | 0.28 | 0.32 | 267101 | 230675 | 214238 |
| NGA | Nigeria | 22796 | Orlu     | 0.20 | 0.28 | 0.32 | 172376 | 148869 | 138261 |
| NGA | Nigeria | 22797 | Orsu     | 0.25 | 0.36 | 0.44 | 70911  | 57023  | 46726  |
| NGA | Nigeria | 22798 | Oru      | 0.20 | 0.28 | 0.32 | 150733 | 130177 | 120901 |
| NGA | Nigeria | 22799 | Owerri   | 0.20 | 0.28 | 0.32 | 277083 | 239296 | 222245 |
| NGA | Nigeria | 22800 | Babura   | 0.13 | 0.13 | 0.13 | 203085 | 203085 | 203085 |
| NGA | Nigeria | 22801 | Biriniwa | 0.13 | 0.13 | 0.13 | 147204 | 147204 | 147204 |
| NGA | Nigeria | 22802 | Birninku | 0.13 | 0.13 | 0.13 | 522743 | 522743 | 522743 |
| NGA | Nigeria | 22803 | Dutse    | 0.13 | 0.13 | 0.13 | 245360 | 245360 | 245360 |
| NGA | Nigeria | 22804 | Garki    | 0.13 | 0.13 | 0.13 | 125328 | 125328 | 125328 |
| NGA | Nigeria | 22805 | Gumel    | 0.13 | 0.13 | 0.13 | 187913 | 187913 | 187913 |
| NGA | Nigeria | 22806 | Gwaram   | 0.13 | 0.13 | 0.13 | 201112 | 201112 | 201112 |
| NGA | Nigeria | 22807 | Hadejia  | 0.13 | 0.13 | 0.13 | 256988 | 256988 | 256988 |
| NGA | Nigeria | 22808 | Jahun    | 0.13 | 0.13 | 0.13 | 285031 | 285031 | 285031 |
| NGA | Nigeria | 22809 | Kafinhau | 0.13 | 0.13 | 0.13 | 180876 | 180876 | 180876 |
| NGA | Nigeria | 22810 | Kazaure  | 0.13 | 0.13 | 0.13 | 242923 | 242923 | 242923 |
| NGA | Nigeria | 22811 | Kirikasa | 0.13 | 0.13 | 0.13 | 181421 | 181421 | 181421 |
| NGA | Nigeria | 22812 | Kiyawa   | 0.13 | 0.13 | 0.13 | 125469 | 125469 | 125469 |
| NGA | Nigeria | 22813 | Malammad | 0.13 | 0.13 | 0.13 | 153100 | 153100 | 153100 |

|     |         |       |          |      |      |      |        |        |        |
|-----|---------|-------|----------|------|------|------|--------|--------|--------|
| NGA | Nigeria | 22814 | Ringim   | 0.13 | 0.13 | 0.13 | 303179 | 303179 | 303179 |
| NGA | Nigeria | 22815 | Roni     | 0.13 | 0.13 | 0.13 | 167320 | 167320 | 167320 |
| NGA | Nigeria | 22816 | Sule-tan | 0.13 | 0.13 | 0.13 | 301253 | 301253 | 301253 |
| NGA | Nigeria | 22817 | Birnin-g | 0.20 | 0.27 | 0.30 | 205898 | 180742 | 170480 |
| NGA | Nigeria | 22818 | Chikun   | 0.20 | 0.27 | 0.30 | 465564 | 408684 | 385478 |
| NGA | Nigeria | 22819 | Doka/kaw | 0.20 | 0.27 | 0.30 | 454610 | 399068 | 376408 |
| NGA | Nigeria | 22820 | Giwa     | 0.20 | 0.27 | 0.30 | 208235 | 182794 | 172415 |
| NGA | Nigeria | 22821 | Igabi    | 0.20 | 0.27 | 0.30 | 390770 | 343028 | 323550 |
| NGA | Nigeria | 22822 | Ikara    | 0.20 | 0.27 | 0.30 | 432897 | 380008 | 358431 |
| NGA | Nigeria | 22823 | Jaba     | 0.20 | 0.27 | 0.30 | 107115 | 94028  | 88689  |
| NGA | Nigeria | 22824 | Jema'a   | 0.20 | 0.27 | 0.30 | 317772 | 278948 | 263109 |
| NGA | Nigeria | 22825 | Kachia   | 0.20 | 0.27 | 0.30 | 417485 | 366479 | 345670 |
| NGA | Nigeria | 22826 | Kaura    | 0.20 | 0.27 | 0.30 | 166217 | 145909 | 137624 |
| NGA | Nigeria | 22827 | Kauru    | 0.20 | 0.27 | 0.30 | 82983  | 72844  | 68708  |
| NGA | Nigeria | 22828 | Lere     | 0.20 | 0.27 | 0.30 | 276736 | 242925 | 229132 |
| NGA | Nigeria | 22829 | Makarfi  | 0.20 | 0.27 | 0.30 | 259651 | 227928 | 214986 |
| NGA | Nigeria | 22830 | Sabon-ga | 0.20 | 0.27 | 0.30 | 402221 | 353079 | 333031 |
| NGA | Nigeria | 22831 | Soba     | 0.20 | 0.27 | 0.30 | 193348 | 169725 | 160088 |
| NGA | Nigeria | 22832 | Tudun    | 0.20 | 0.27 | 0.30 | 152028 | 133454 | 125876 |
| NGA | Nigeria | 22833 | Zangonka | 0.20 | 0.27 | 0.30 | 261385 | 229450 | 216422 |
| NGA | Nigeria | 22834 | Zaria    | 0.20 | 0.27 | 0.30 | 50819  | 44610  | 42077  |
| NGA | Nigeria | 22835 | Albasu   | 0.20 | 0.27 | 0.30 | 102272 | 89777  | 84679  |
| NGA | Nigeria | 22836 | Bagwai   | 0.20 | 0.27 | 0.30 | 121390 | 106559 | 100509 |
| NGA | Nigeria | 22837 | Bebeji   | 0.20 | 0.27 | 0.30 | 333947 | 293147 | 276502 |
| NGA | Nigeria | 22838 | Bichi    | 0.20 | 0.27 | 0.30 | 243996 | 214186 | 202024 |
| NGA | Nigeria | 22839 | Bunkure  | 0.20 | 0.27 | 0.30 | 139831 | 122747 | 115777 |
| NGA | Nigeria | 22840 | Dala     | 0.20 | 0.27 | 0.30 | 439664 | 385948 | 364033 |
| NGA | Nigeria | 22841 | Dambatta | 0.20 | 0.27 | 0.30 | 328922 | 288736 | 272341 |
| NGA | Nigeria | 22842 | Dawakink | 0.20 | 0.27 | 0.30 | 266376 | 233831 | 220554 |
| NGA | Nigeria | 22843 | Dawakint | 0.20 | 0.27 | 0.30 | 199152 | 174820 | 164894 |
| NGA | Nigeria | 22844 | Gabasawa | 0.20 | 0.27 | 0.30 | 181869 | 159649 | 150584 |
| NGA | Nigeria | 22845 | Gaya     | 0.20 | 0.27 | 0.30 | 386426 | 339214 | 319953 |
| NGA | Nigeria | 22846 | Gezawa   | 0.20 | 0.27 | 0.30 | 288394 | 253160 | 238785 |

|     |         |       |             |      |      |      |         |         |         |
|-----|---------|-------|-------------|------|------|------|---------|---------|---------|
| NGA | Nigeria | 22847 | Gwarzo      | 0.20 | 0.27 | 0.30 | 128733  | 113005  | 106588  |
| NGA | Nigeria | 22848 | Kabo        | 0.20 | 0.27 | 0.30 | 100857  | 88535   | 83508   |
| NGA | Nigeria | 22849 | Kano        | 0.20 | 0.27 | 0.30 | 210820  | 185063  | 174555  |
| NGA | Nigeria | 22850 | Karaye      | 0.20 | 0.27 | 0.30 | 276207  | 242461  | 228694  |
| NGA | Nigeria | 22851 | Kumbotso    | 0.20 | 0.27 | 0.30 | 141232  | 123977  | 116937  |
| NGA | Nigeria | 22852 | Kura        | 0.20 | 0.27 | 0.30 | 257564  | 226096  | 213258  |
| NGA | Nigeria | 22853 | Minjibir    | 0.20 | 0.27 | 0.30 | 168720  | 148107  | 139697  |
| NGA | Nigeria | 22854 | Nassaraw    | 0.20 | 0.27 | 0.30 | 1210419 | 1062536 | 1002204 |
| NGA | Nigeria | 22855 | Rano        | 0.20 | 0.27 | 0.30 | 214122  | 187961  | 177289  |
| NGA | Nigeria | 22856 | Rimingad    | 0.20 | 0.27 | 0.30 | 204452  | 179473  | 169283  |
| NGA | Nigeria | 22857 | Shanono     | 0.20 | 0.27 | 0.30 | 127065  | 111541  | 105207  |
| NGA | Nigeria | 22858 | Sumaila     | 0.20 | 0.27 | 0.30 | 170818  | 149948  | 141434  |
| NGA | Nigeria | 22859 | Takai       | 0.20 | 0.27 | 0.30 | 194822  | 171020  | 161309  |
| NGA | Nigeria | 22860 | Tsanyawa    | 0.20 | 0.27 | 0.30 | 179233  | 157336  | 148402  |
| NGA | Nigeria | 22861 | Tudunwad    | 0.20 | 0.27 | 0.30 | 290713  | 255195  | 240705  |
| NGA | Nigeria | 22862 | Ungogo      | 0.20 | 0.27 | 0.30 | 608184  | 533879  | 503565  |
| NGA | Nigeria | 22863 | Wudil       | 0.20 | 0.27 | 0.30 | 273797  | 240346  | 226699  |
| NGA | Nigeria | 22864 | Bakori      | 0.20 | 0.27 | 0.30 | 242103  | 212524  | 200457  |
| NGA | Nigeria | 22865 | Batsari     | 0.20 | 0.27 | 0.30 | 118156  | 103720  | 97831   |
| NGA | Nigeria | 22866 | Bindawa     | 0.20 | 0.27 | 0.30 | 122427  | 107470  | 101368  |
| NGA | Nigeria | 22867 | Daura       | 0.20 | 0.27 | 0.30 | 509289  | 447066  | 421682  |
| NGA | Nigeria | 22868 | Dutsin-m    | 0.20 | 0.27 | 0.30 | 297932  | 261532  | 246682  |
| NGA | Nigeria | 22869 | Faskari     | 0.20 | 0.27 | 0.30 | 265599  | 233150  | 219911  |
| NGA | Nigeria | 22870 | Funtua      | 0.20 | 0.27 | 0.30 | 296721  | 260469  | 245679  |
| NGA | Nigeria | 22871 | Ingawa      | 0.20 | 0.27 | 0.30 | 132952  | 116709  | 110082  |
| NGA | Nigeria | 22872 | Jibia       | 0.20 | 0.27 | 0.30 | 133953  | 117587  | 110910  |
| NGA | Nigeria | 22873 | Kaita       | 0.20 | 0.27 | 0.30 | 115003  | 100952  | 95220   |
| NGA | Nigeria | 22874 | Kankara     | 0.20 | 0.27 | 0.30 | 192740  | 169192  | 159585  |
| NGA | Nigeria | 22875 | Kankiya     | 0.20 | 0.27 | 0.30 | 239306  | 210069  | 198141  |
| NGA | Nigeria | 22876 | Katsina (k) | 0.20 | 0.27 | 0.30 | 409083  | 359103  | 338713  |
| NGA | Nigeria | 22877 | Malumfas    | 0.20 | 0.27 | 0.30 | 354196  | 310922  | 293268  |
| NGA | Nigeria | 22878 | Mani        | 0.20 | 0.27 | 0.30 | 157179  | 137976  | 130142  |
| NGA | Nigeria | 22879 | Mashi       | 0.20 | 0.27 | 0.30 | 217966  | 191336  | 180472  |

|     |         |       |          |      |      |      |        |        |        |
|-----|---------|-------|----------|------|------|------|--------|--------|--------|
| NGA | Nigeria | 22880 | Musawa   | 0.20 | 0.27 | 0.30 | 167487 | 147024 | 138676 |
| NGA | Nigeria | 22881 | Rimi     | 0.20 | 0.27 | 0.30 | 211205 | 185401 | 174874 |
| NGA | Nigeria | 22882 | Safana   | 0.20 | 0.27 | 0.30 | 209276 | 183708 | 173277 |
| NGA | Nigeria | 22883 | Zango    | 0.20 | 0.27 | 0.30 | 315441 | 276902 | 261179 |
| NGA | Nigeria | 22884 | Arewa    | 0.13 | 0.13 | 0.13 | 233448 | 233448 | 233448 |
| NGA | Nigeria | 22885 | Argungu  | 0.13 | 0.13 | 0.13 | 298624 | 298624 | 298624 |
| NGA | Nigeria | 22886 | Bagudo   | 0.13 | 0.13 | 0.13 | 237871 | 237871 | 237871 |
| NGA | Nigeria | 22887 | Birninke | 0.13 | 0.13 | 0.13 | 239105 | 239105 | 239105 |
| NGA | Nigeria | 22888 | Bunza    | 0.13 | 0.13 | 0.13 | 149905 | 149905 | 149905 |
| NGA | Nigeria | 22889 | Dandi    | 0.13 | 0.13 | 0.13 | 144662 | 144662 | 144662 |
| NGA | Nigeria | 22890 | Gwandu   | 0.13 | 0.13 | 0.13 | 76078  | 76078  | 76078  |
| NGA | Nigeria | 22891 | Jega     | 0.13 | 0.13 | 0.13 | 220053 | 220053 | 220053 |
| NGA | Nigeria | 22892 | Koko/bes | 0.13 | 0.13 | 0.13 | 132039 | 132039 | 132039 |
| NGA | Nigeria | 22893 | Maiyama  | 0.13 | 0.13 | 0.13 | 160737 | 160737 | 160737 |
| NGA | Nigeria | 22894 | Ngaski   | 0.13 | 0.13 | 0.13 | 113959 | 113959 | 113959 |
| NGA | Nigeria | 22895 | Sakaba   | 0.13 | 0.13 | 0.13 | 288451 | 288451 | 288451 |
| NGA | Nigeria | 22896 | Suru     | 0.13 | 0.13 | 0.13 | 149560 | 149560 | 149560 |
| NGA | Nigeria | 22897 | Yauri    | 0.13 | 0.13 | 0.13 | 183091 | 183091 | 183091 |
| NGA | Nigeria | 22898 | Zuru     | 0.13 | 0.13 | 0.13 | 208585 | 208585 | 208585 |
| NGA | Nigeria | 22899 | Adavi    | 0.13 | 0.13 | 0.13 | 129809 | 129809 | 129809 |
| NGA | Nigeria | 22900 | Ajaokuta | 0.13 | 0.13 | 0.13 | 480674 | 480674 | 480674 |
| NGA | Nigeria | 22901 | Ankpa    | 0.13 | 0.13 | 0.13 | 348680 | 348680 | 348680 |
| NGA | Nigeria | 22902 | Bassa    | 0.13 | 0.13 | 0.13 | 111076 | 111076 | 111076 |
| NGA | Nigeria | 22903 | Dekina   | 0.13 | 0.13 | 0.13 | 230123 | 230123 | 230123 |
| NGA | Nigeria | 22904 | Ijumu    | 0.13 | 0.13 | 0.13 | 88480  | 88480  | 88480  |
| NGA | Nigeria | 22905 | Kabba/bu | 0.13 | 0.13 | 0.13 | 130124 | 130124 | 130124 |
| NGA | Nigeria | 22906 | Kogi     | 0.13 | 0.13 | 0.13 | 92757  | 92757  | 92757  |
| NGA | Nigeria | 22907 | Kotonkar | 0.13 | 0.13 | 0.13 | 157726 | 157726 | 157726 |
| NGA | Nigeria | 22908 | Ofu      | 0.13 | 0.13 | 0.13 | 113605 | 113605 | 113605 |
| NGA | Nigeria | 22909 | Okehi    | 0.13 | 0.13 | 0.13 | 220308 | 220308 | 220308 |
| NGA | Nigeria | 22910 | Okene    | 0.13 | 0.13 | 0.13 | 360167 | 360167 | 360167 |
| NGA | Nigeria | 22911 | Olamabor | 0.13 | 0.13 | 0.13 | 117117 | 117117 | 117117 |
| NGA | Nigeria | 22912 | Yagbaeas | 0.13 | 0.13 | 0.13 | 145496 | 145496 | 145496 |



|     |         |       |              |      |      |      |         |         |         |
|-----|---------|-------|--------------|------|------|------|---------|---------|---------|
| NGA | Nigeria | 22913 | Yagbawes     | 0.13 | 0.13 | 0.13 | 131270  | 131270  | 131270  |
| NGA | Nigeria | 22914 | Asa          | 0.20 | 0.27 | 0.30 | 116057  | 101877  | 96093   |
| NGA | Nigeria | 22915 | Baruten      | 0.20 | 0.27 | 0.30 | 150063  | 131729  | 124249  |
| NGA | Nigeria | 22916 | Edu          | 0.20 | 0.27 | 0.30 | 239640  | 210362  | 198417  |
| NGA | Nigeria | 22917 | Ifelodun     | 0.20 | 0.27 | 0.30 | 158730  | 139337  | 131426  |
| NGA | Nigeria | 22918 | Ilorinwe     | 0.20 | 0.27 | 0.30 | 699640  | 614161  | 579289  |
| NGA | Nigeria | 22919 | Irepodun     | 0.20 | 0.27 | 0.30 | 257530  | 226066  | 213230  |
| NGA | Nigeria | 22920 | Irepodun (b) | 0.13 | 0.13 | 0.13 | 196083  | 196083  | 196083  |
| NGA | Nigeria | 22921 | Kaiama       | 0.20 | 0.27 | 0.30 | 95355   | 83705   | 78952   |
| NGA | Nigeria | 22922 | Moro         | 0.20 | 0.27 | 0.30 | 86001   | 75493   | 71207   |
| NGA | Nigeria | 22923 | Offa         | 0.20 | 0.27 | 0.30 | 102080  | 89608   | 84520   |
| NGA | Nigeria | 22924 | Oyun         | 0.20 | 0.27 | 0.30 | 62257   | 54650   | 51547   |
| NGA | Nigeria | 22925 | Agege        | 0.20 | 0.27 | 0.30 | 698463  | 613128  | 578315  |
| NGA | Nigeria | 22926 | Badagary     | 0.20 | 0.27 | 0.30 | 254351  | 223275  | 210598  |
| NGA | Nigeria | 22927 | Epe          | 0.20 | 0.27 | 0.30 | 154110  | 135281  | 127600  |
| NGA | Nigeria | 22928 | Eti-osa      | 0.20 | 0.27 | 0.30 | 185914  | 163200  | 153934  |
| NGA | Nigeria | 22929 | Ibeju/lekki  | 0.20 | 0.27 | 0.30 | 87807   | 77079   | 72703   |
| NGA | Nigeria | 22930 | Ikeja        | 0.20 | 0.27 | 0.30 | 2077376 | 1823572 | 1720028 |
| NGA | Nigeria | 22931 | Ikorodu      | 0.20 | 0.27 | 0.30 | 431563  | 378837  | 357326  |
| NGA | Nigeria | 22932 | Lagosisland  | 0.20 | 0.27 | 0.30 | 853456  | 749185  | 706646  |
| NGA | Nigeria | 22933 | Mainland     | 0.20 | 0.27 | 0.30 | 892060  | 783073  | 738609  |
| NGA | Nigeria | 22934 | Mushin       | 0.20 | 0.27 | 0.30 | 914516  | 802784  | 757202  |
| NGA | Nigeria | 22935 | Ojo          | 0.20 | 0.27 | 0.30 | 1912953 | 1679238 | 1583889 |
| NGA | Nigeria | 22936 | Shomolu      | 0.20 | 0.27 | 0.30 | 358870  | 315025  | 297137  |
| NGA | Nigeria | 22937 | Agaie        | 0.20 | 0.27 | 0.30 | 96753   | 84932   | 80110   |
| NGA | Nigeria | 22938 | Agwara       | 0.20 | 0.27 | 0.30 | 38099   | 33444   | 31545   |
| NGA | Nigeria | 22939 | Bida         | 0.20 | 0.27 | 0.30 | 261258  | 229339  | 216317  |
| NGA | Nigeria | 22940 | Borgu        | 0.20 | 0.27 | 0.30 | 131339  | 115292  | 108746  |
| NGA | Nigeria | 22941 | Bosso        | 0.20 | 0.27 | 0.30 | 283003  | 248427  | 234322  |
| NGA | Nigeria | 22942 | Gbako        | 0.20 | 0.27 | 0.30 | 164219  | 144156  | 135970  |
| NGA | Nigeria | 22943 | Gurara       | 0.20 | 0.27 | 0.30 | 177816  | 156091  | 147228  |
| NGA | Nigeria | 22944 | Kontogur     | 0.20 | 0.27 | 0.30 | 288725  | 253450  | 239059  |
| NGA | Nigeria | 22945 | Lapai        | 0.20 | 0.27 | 0.30 | 90693   | 79612   | 75092   |

|     |         |       |                 |      |      |      |        |        |        |
|-----|---------|-------|-----------------|------|------|------|--------|--------|--------|
| NGA | Nigeria | 22946 | Lavun           | 0.20 | 0.27 | 0.30 | 251497 | 220770 | 208234 |
| NGA | Nigeria | 22947 | Magama          | 0.20 | 0.27 | 0.30 | 137152 | 120396 | 113559 |
| NGA | Nigeria | 22948 | Mokwa           | 0.20 | 0.27 | 0.30 | 151526 | 133014 | 125461 |
| NGA | Nigeria | 22949 | Paikoro         | 0.20 | 0.27 | 0.30 | 120191 | 105506 | 99516  |
| NGA | Nigeria | 22950 | Rafi            | 0.20 | 0.27 | 0.30 | 128144 | 112488 | 106100 |
| NGA | Nigeria | 22951 | Rijau           | 0.20 | 0.27 | 0.30 | 116326 | 102114 | 96316  |
| NGA | Nigeria | 22952 | Shiroro         | 0.20 | 0.27 | 0.30 | 277330 | 243447 | 229624 |
| NGA | Nigeria | 22953 | Suleja          | 0.20 | 0.27 | 0.30 | 231689 | 203382 | 191834 |
| NGA | Nigeria | 22954 | Wushishi        | 0.20 | 0.27 | 0.30 | 233685 | 205135 | 193487 |
| NGA | Nigeria | 22955 | Abeokutanorth   | 0.20 | 0.27 | 0.30 | 395143 | 346866 | 327171 |
| NGA | Nigeria | 22956 | Adoodo/ota      | 0.20 | 0.27 | 0.30 | 286992 | 251928 | 237624 |
| NGA | Nigeria | 22957 | Egbadonorth     | 0.20 | 0.27 | 0.30 | 203870 | 178962 | 168801 |
| NGA | Nigeria | 22958 | Egbadosouth     | 0.20 | 0.27 | 0.30 | 214287 | 188106 | 177426 |
| NGA | Nigeria | 22959 | Ifo             | 0.20 | 0.27 | 0.30 | 366223 | 321479 | 303225 |
| NGA | Nigeria | 22960 | Ijebueast       | 0.20 | 0.27 | 0.30 | 85391  | 74959  | 70702  |
| NGA | Nigeria | 22961 | Ijebunorth      | 0.20 | 0.27 | 0.30 | 237154 | 208180 | 196359 |
| NGA | Nigeria | 22962 | Ijebuode        | 0.20 | 0.27 | 0.30 | 281799 | 247371 | 233325 |
| NGA | Nigeria | 22963 | Obafemi-owode   | 0.20 | 0.27 | 0.30 | 156291 | 137197 | 129406 |
| NGA | Nigeria | 22964 | Odeda           | 0.20 | 0.27 | 0.30 | 84713  | 74363  | 70141  |
| NGA | Nigeria | 22965 | Ogunwaterside   | 0.20 | 0.27 | 0.30 | 60342  | 52970  | 49962  |
| NGA | Nigeria | 22966 | Shagamu         | 0.20 | 0.27 | 0.30 | 335043 | 294109 | 277410 |
| NGA | Nigeria | 22967 | Ado-ekiti       | 0.13 | 0.13 | 0.13 | 296056 | 296056 | 296056 |
| NGA | Nigeria | 22968 | Akokonorth      | 0.20 | 0.27 | 0.30 | 170265 | 149463 | 140977 |
| NGA | Nigeria | 22969 | Akokonorthwest  | 0.20 | 0.27 | 0.30 | 144888 | 127186 | 119965 |
| NGA | Nigeria | 22970 | Akokosou        | 0.20 | 0.27 | 0.30 | 230805 | 202607 | 191103 |
| NGA | Nigeria | 22971 | Akure           | 0.20 | 0.27 | 0.30 | 437280 | 383856 | 362060 |
| NGA | Nigeria | 22972 | Ekitieas        | 0.13 | 0.13 | 0.13 | 311481 | 311481 | 311481 |
| NGA | Nigeria | 22973 | Ekitisouth-west | 0.13 | 0.13 | 0.13 | 117722 | 117722 | 117722 |
| NGA | Nigeria | 22974 | Ekitiwest       | 0.13 | 0.13 | 0.13 | 237814 | 237814 | 237814 |
| NGA | Nigeria | 22975 | Emure/ise/orun  | 0.13 | 0.13 | 0.13 | 244990 | 244990 | 244990 |
| NGA | Nigeria | 22976 | Idanre          | 0.20 | 0.27 | 0.30 | 94514  | 82966  | 78256  |
| NGA | Nigeria | 22977 | Ido/osi         | 0.13 | 0.13 | 0.13 | 141405 | 141405 | 141405 |
| NGA | Nigeria | 22978 | Ifedore         | 0.20 | 0.27 | 0.30 | 128946 | 113192 | 106765 |

|     |         |       |                  |      |      |      |        |        |        |
|-----|---------|-------|------------------|------|------|------|--------|--------|--------|
| NGA | Nigeria | 22979 | Ijero            | 0.13 | 0.13 | 0.13 | 226467 | 226467 | 226467 |
| NGA | Nigeria | 22980 | Ikale            | 0.20 | 0.27 | 0.30 | 220442 | 193509 | 182521 |
| NGA | Nigeria | 22981 | Ikere            | 0.13 | 0.13 | 0.13 | 142621 | 142621 | 142621 |
| NGA | Nigeria | 22982 | Ikole            | 0.13 | 0.13 | 0.13 | 148951 | 148951 | 148951 |
| NGA | Nigeria | 22983 | Ilajeeseodo      | 0.20 | 0.27 | 0.30 | 304565 | 267354 | 252174 |
| NGA | Nigeria | 22984 | Ileoluji/okeigbo | 0.20 | 0.27 | 0.30 | 148420 | 130287 | 122889 |
| NGA | Nigeria | 22985 | Irele            | 0.20 | 0.27 | 0.30 | 92867  | 81521  | 76892  |
| NGA | Nigeria | 22986 | Moba             | 0.13 | 0.13 | 0.13 | 137042 | 137042 | 137042 |
| NGA | Nigeria | 22987 | Odigbo           | 0.20 | 0.27 | 0.30 | 180724 | 158644 | 149636 |
| NGA | Nigeria | 22988 | Ondo             | 0.20 | 0.27 | 0.30 | 330144 | 289809 | 273353 |
| NGA | Nigeria | 22989 | Ose              | 0.20 | 0.27 | 0.30 | 119806 | 105169 | 99197  |
| NGA | Nigeria | 22990 | Owo              | 0.20 | 0.27 | 0.30 | 194293 | 170555 | 160871 |
| NGA | Nigeria | 22991 | Oye              | 0.13 | 0.13 | 0.13 | 110472 | 110472 | 110472 |
| NGA | Nigeria | 22992 | Atakumosa        | 0.13 | 0.13 | 0.13 | 177853 | 177853 | 177853 |
| NGA | Nigeria | 22993 | Ayedaade         | 0.13 | 0.13 | 0.13 | 86744  | 86744  | 86744  |
| NGA | Nigeria | 22994 | Ayedire          | 0.13 | 0.13 | 0.13 | 55080  | 55080  | 55080  |
| NGA | Nigeria | 22995 | Boripe           | 0.13 | 0.13 | 0.13 | 166999 | 166999 | 166999 |
| NGA | Nigeria | 22996 | Ede              | 0.13 | 0.13 | 0.13 | 92160  | 92160  | 92160  |
| NGA | Nigeria | 22997 | Egbedore         | 0.13 | 0.13 | 0.13 | 79057  | 79057  | 79057  |
| NGA | Nigeria | 22998 | Ejigbo           | 0.13 | 0.13 | 0.13 | 127313 | 127313 | 127313 |
| NGA | Nigeria | 22999 | Ifecentral       | 0.13 | 0.13 | 0.13 | 418044 | 418044 | 418044 |
| NGA | Nigeria | 23000 | Ifelodun         | 0.13 | 0.13 | 0.13 | 134978 | 134978 | 134978 |
| NGA | Nigeria | 23001 | Ifenorth         | 0.13 | 0.13 | 0.13 | 95206  | 95206  | 95206  |
| NGA | Nigeria | 23002 | Ifesouth         | 0.13 | 0.13 | 0.13 | 102783 | 102783 | 102783 |
| NGA | Nigeria | 23003 | Ila              | 0.13 | 0.13 | 0.13 | 126925 | 126925 | 126925 |
| NGA | Nigeria | 23004 | Ilesa            | 0.13 | 0.13 | 0.13 | 144254 | 144254 | 144254 |
| NGA | Nigeria | 23005 | Irewole          | 0.13 | 0.13 | 0.13 | 274215 | 274215 | 274215 |
| NGA | Nigeria | 23006 | Iwo              | 0.13 | 0.13 | 0.13 | 201354 | 201354 | 201354 |
| NGA | Nigeria | 23007 | Obokun           | 0.13 | 0.13 | 0.13 | 113427 | 113427 | 113427 |
| NGA | Nigeria | 23008 | Odo0tin          | 0.13 | 0.13 | 0.13 | 134894 | 134894 | 134894 |
| NGA | Nigeria | 23009 | Ola-oluwa        | 0.13 | 0.13 | 0.13 | 63719  | 63719  | 63719  |
| NGA | Nigeria | 23010 | Olorunda         | 0.13 | 0.13 | 0.13 | 131437 | 131437 | 131437 |
| NGA | Nigeria | 23011 | Oriade           | 0.13 | 0.13 | 0.13 | 226406 | 226406 | 226406 |

|     |         |       |                  |      |      |      |        |        |        |
|-----|---------|-------|------------------|------|------|------|--------|--------|--------|
| NGA | Nigeria | 23012 | Osogbo           | 0.13 | 0.13 | 0.13 | 138767 | 138767 | 138767 |
| NGA | Nigeria | 23013 | Afijio           | 0.20 | 0.27 | 0.30 | 88959  | 78090  | 73656  |
| NGA | Nigeria | 23014 | Akinyele         | 0.20 | 0.27 | 0.30 | 114074 | 100137 | 94451  |
| NGA | Nigeria | 23015 | Egbeda           | 0.20 | 0.27 | 0.30 | 64461  | 56585  | 53372  |
| NGA | Nigeria | 23016 | Ibadannorth      | 0.20 | 0.27 | 0.30 | 769886 | 675825 | 637451 |
| NGA | Nigeria | 23017 | Ibadannorth-east | 0.20 | 0.27 | 0.30 | 666524 | 585091 | 551869 |
| NGA | Nigeria | 23018 | Ibadannorth-west | 0.20 | 0.27 | 0.30 | 31320  | 27493  | 25932  |
| NGA | Nigeria | 23019 | Ibadansouth-east | 0.20 | 0.27 | 0.30 | 179921 | 157939 | 148971 |
| NGA | Nigeria | 23020 | Ibadansouth-west | 0.20 | 0.27 | 0.30 | 115398 | 101299 | 95547  |
| NGA | Nigeria | 23021 | Ibarapa          | 0.20 | 0.27 | 0.30 | 84439  | 74123  | 69914  |
| NGA | Nigeria | 23022 | Ido              | 0.20 | 0.27 | 0.30 | 42336  | 37164  | 35054  |
| NGA | Nigeria | 23023 | Ifedapo          | 0.20 | 0.27 | 0.30 | 395661 | 347321 | 327600 |
| NGA | Nigeria | 23024 | Ifeloju          | 0.20 | 0.27 | 0.30 | 167021 | 146615 | 138290 |
| NGA | Nigeria | 23025 | Irepo            | 0.20 | 0.27 | 0.30 | 162384 | 142544 | 134451 |
| NGA | Nigeria | 23026 | Iseyin           | 0.20 | 0.27 | 0.30 | 300343 | 263648 | 248678 |
| NGA | Nigeria | 23027 | Kajola           | 0.20 | 0.27 | 0.30 | 230662 | 202481 | 190984 |
| NGA | Nigeria | 23028 | Lagelu           | 0.20 | 0.27 | 0.30 | 90686  | 79606  | 75086  |
| NGA | Nigeria | 23029 | Ogbomoso         | 0.20 | 0.27 | 0.30 | 277557 | 243646 | 229812 |
| NGA | Nigeria | 23030 | Ogo-oluw         | 0.20 | 0.27 | 0.30 | 51896  | 45556  | 42969  |
| NGA | Nigeria | 23031 | Oluyole          | 0.20 | 0.27 | 0.30 | 71500  | 62764  | 59201  |
| NGA | Nigeria | 23032 | Ona-ara          | 0.20 | 0.27 | 0.30 | 123659 | 108551 | 102387 |
| NGA | Nigeria | 23033 | Orelope          | 0.20 | 0.27 | 0.30 | 79052  | 69394  | 65454  |
| NGA | Nigeria | 23034 | Orire            | 0.20 | 0.27 | 0.30 | 106308 | 93320  | 88021  |
| NGA | Nigeria | 23035 | Oyo              | 0.20 | 0.27 | 0.30 | 362317 | 318051 | 299992 |
| NGA | Nigeria | 23036 | Surulere         | 0.20 | 0.27 | 0.30 | 94000  | 82516  | 77830  |
| NGA | Nigeria | 23037 | Akwanga          | 0.54 | 0.57 | 0.62 | 47938  | 41825  | 32353  |
| NGA | Nigeria | 23038 | Awe              | 0.54 | 0.57 | 0.62 | 62078  | 54161  | 41896  |
| NGA | Nigeria | 23039 | Barinkil         | 0.20 | 0.28 | 0.32 | 222668 | 192226 | 178462 |
| NGA | Nigeria | 23040 | Bassa            | 0.20 | 0.28 | 0.32 | 133928 | 115619 | 107340 |
| NGA | Nigeria | 23041 | Doma             | 0.54 | 0.57 | 0.62 | 46959  | 40971  | 31692  |
| NGA | Nigeria | 23042 | Josnorth         | 0.20 | 0.28 | 0.32 | 718496 | 620268 | 575854 |
| NGA | Nigeria | 23043 | Kanam            | 0.20 | 0.28 | 0.32 | 137610 | 118797 | 110290 |
| NGA | Nigeria | 23044 | Keffi            | 0.54 | 0.57 | 0.62 | 144949 | 126464 | 97825  |

|     |         |       |              |      |      |      |        |        |        |
|-----|---------|-------|--------------|------|------|------|--------|--------|--------|
| NGA | Nigeria | 23045 | Lafia        | 0.54 | 0.57 | 0.62 | 170897 | 149104 | 115337 |
| NGA | Nigeria | 23046 | Langtang     | 0.20 | 0.28 | 0.32 | 116241 | 100349 | 93164  |
| NGA | Nigeria | 23047 | Langtang (b) | 0.20 | 0.28 | 0.32 | 81055  | 69974  | 64963  |
| NGA | Nigeria | 23048 | Mangu        | 0.20 | 0.28 | 0.32 | 361592 | 312158 | 289806 |
| NGA | Nigeria | 23049 | Nasarawa     | 0.54 | 0.57 | 0.62 | 146525 | 127839 | 98888  |
| NGA | Nigeria | 23050 | Pankshin     | 0.20 | 0.28 | 0.32 | 235335 | 203161 | 188614 |
| NGA | Nigeria | 23051 | Qua'anpa     | 0.20 | 0.28 | 0.32 | 146851 | 126774 | 117697 |
| NGA | Nigeria | 23052 | Shendam      | 0.20 | 0.28 | 0.32 | 230473 | 198964 | 184717 |
| NGA | Nigeria | 23053 | Wase         | 0.20 | 0.28 | 0.32 | 116594 | 100654 | 93447  |
| NGA | Nigeria | 23054 | Abua/odu     | 0.20 | 0.28 | 0.32 | 218202 | 188445 | 175017 |
| NGA | Nigeria | 23055 | Ahoda        | 0.20 | 0.28 | 0.32 | 289185 | 249748 | 231952 |
| NGA | Nigeria | 23056 | Akukutor     | 0.20 | 0.28 | 0.32 | 106453 | 91936  | 85385  |
| NGA | Nigeria | 23057 | Andoni/o     | 0.20 | 0.28 | 0.32 | 123542 | 106694 | 99092  |
| NGA | Nigeria | 23058 | Asari-to     | 0.20 | 0.28 | 0.32 | 60160  | 51955  | 48253  |
| NGA | Nigeria | 23059 | Bonny        | 0.20 | 0.28 | 0.32 | 148502 | 128250 | 119112 |
| NGA | Nigeria | 23060 | Brass        | 0.13 | 0.13 | 0.13 | 385967 | 385967 | 385967 |
| NGA | Nigeria | 23061 | Degema       | 0.20 | 0.28 | 0.32 | 241442 | 208515 | 193658 |
| NGA | Nigeria | 23062 | Ekeremor     | 0.13 | 0.13 | 0.13 | 174662 | 174662 | 174662 |
| NGA | Nigeria | 23063 | Emuoha       | 0.20 | 0.28 | 0.32 | 148899 | 128593 | 119430 |
| NGA | Nigeria | 23064 | Etche        | 0.20 | 0.28 | 0.32 | 321630 | 277768 | 257975 |
| NGA | Nigeria | 23065 | Gokana       | 0.20 | 0.28 | 0.32 | 81012  | 69964  | 64979  |
| NGA | Nigeria | 23066 | Ikwerre      | 0.20 | 0.28 | 0.32 | 212154 | 183222 | 170166 |
| NGA | Nigeria | 23067 | Khana        | 0.20 | 0.28 | 0.32 | 522403 | 451160 | 419013 |
| NGA | Nigeria | 23068 | Northern     | 0.13 | 0.13 | 0.13 | 358632 | 358632 | 358632 |
| NGA | Nigeria | 23069 | Obio/akp     | 0.20 | 0.28 | 0.32 | 636896 | 550039 | 510847 |
| NGA | Nigeria | 23070 | Ogba/egbe    | 0.20 | 0.28 | 0.32 | 203561 | 175800 | 163274 |
| NGA | Nigeria | 23071 | Okrika       | 0.20 | 0.28 | 0.32 | 164513 | 142078 | 131954 |
| NGA | Nigeria | 23072 | Portharcourt | 0.20 | 0.28 | 0.32 | 144693 | 124960 | 116056 |
| NGA | Nigeria | 23073 | Sagbama      | 0.13 | 0.13 | 0.13 | 136026 | 136026 | 136026 |
| NGA | Nigeria | 23074 | Southernijaw | 0.13 | 0.13 | 0.13 | 288400 | 288400 | 288400 |
| NGA | Nigeria | 23075 | Tai/ekem     | 0.20 | 0.28 | 0.32 | 408541 | 352826 | 327686 |
| NGA | Nigeria | 23076 | Anka         | 0.13 | 0.13 | 0.13 | 368454 | 368454 | 368454 |
| NGA | Nigeria | 23077 | Bakura       | 0.13 | 0.13 | 0.13 | 185782 | 185782 | 185782 |

|     |         |       |          |      |      |      |        |        |        |
|-----|---------|-------|----------|------|------|------|--------|--------|--------|
| NGA | Nigeria | 23078 | Binji    | 0.20 | 0.27 | 0.30 | 83816  | 73575  | 69398  |
| NGA | Nigeria | 23079 | Bodinga  | 0.20 | 0.27 | 0.30 | 111800 | 98141  | 92568  |
| NGA | Nigeria | 23080 | Bungudu  | 0.13 | 0.13 | 0.13 | 392930 | 392930 | 392930 |
| NGA | Nigeria | 23081 | Dange-sh | 0.20 | 0.27 | 0.30 | 100987 | 88649  | 83615  |
| NGA | Nigeria | 23082 | Gada     | 0.20 | 0.27 | 0.30 | 220018 | 193137 | 182170 |
| NGA | Nigeria | 23083 | Goronyo  | 0.20 | 0.27 | 0.30 | 94389  | 82857  | 78152  |
| NGA | Nigeria | 23084 | Gummi    | 0.13 | 0.13 | 0.13 | 471300 | 471300 | 471300 |
| NGA | Nigeria | 23085 | Gusau    | 0.13 | 0.13 | 0.13 | 254698 | 254698 | 254698 |
| NGA | Nigeria | 23086 | Gwadabaw | 0.20 | 0.27 | 0.30 | 254461 | 223372 | 210689 |
| NGA | Nigeria | 23087 | Illela   | 0.20 | 0.27 | 0.30 | 156375 | 137270 | 129475 |
| NGA | Nigeria | 23088 | Isa      | 0.13 | 0.13 | 0.13 | 292183 | 292183 | 292183 |
| NGA | Nigeria | 23089 | Kaura-na | 0.13 | 0.13 | 0.13 | 370764 | 370764 | 370764 |
| NGA | Nigeria | 23090 | Kware    | 0.20 | 0.27 | 0.30 | 192942 | 169369 | 159752 |
| NGA | Nigeria | 23091 | Maradun  | 0.13 | 0.13 | 0.13 | 149364 | 149364 | 149364 |
| NGA | Nigeria | 23092 | Rabah    | 0.20 | 0.27 | 0.30 | 124218 | 109041 | 102850 |
| NGA | Nigeria | 23093 | Sabonbir | 0.20 | 0.27 | 0.30 | 161641 | 141892 | 133836 |
| NGA | Nigeria | 23094 | Silame   | 0.20 | 0.27 | 0.30 | 49312  | 43288  | 40830  |
| NGA | Nigeria | 23095 | Sokoto   | 0.20 | 0.27 | 0.30 | 348472 | 305897 | 288528 |
| NGA | Nigeria | 23096 | Talatar  | 0.13 | 0.13 | 0.13 | 177241 | 177241 | 177241 |
| NGA | Nigeria | 23097 | Tambawal | 0.20 | 0.27 | 0.30 | 258681 | 227076 | 214183 |
| NGA | Nigeria | 23098 | Tangazar | 0.20 | 0.27 | 0.30 | 182578 | 160272 | 151171 |
| NGA | Nigeria | 23099 | Tsafe    | 0.13 | 0.13 | 0.13 | 166359 | 166359 | 166359 |
| NGA | Nigeria | 23100 | Wamakko  | 0.20 | 0.27 | 0.30 | 240666 | 211262 | 199267 |
| NGA | Nigeria | 23101 | Wurno    | 0.20 | 0.27 | 0.30 | 47537  | 41729  | 39359  |
| NGA | Nigeria | 23102 | Yabo     | 0.20 | 0.27 | 0.30 | 181384 | 159224 | 150183 |
| NGA | Nigeria | 23103 | Zurmi    | 0.13 | 0.13 | 0.13 | 240812 | 240812 | 240812 |
| NGA | Nigeria | 23104 | Bali     | 0.20 | 0.27 | 0.30 | 333884 | 293092 | 276450 |
| NGA | Nigeria | 23105 | Donga    | 0.20 | 0.27 | 0.30 | 95155  | 83530  | 78787  |
| NGA | Nigeria | 23106 | Gashaka  | 0.20 | 0.27 | 0.30 | 69056  | 60619  | 57177  |
| NGA | Nigeria | 23107 | Ibi      | 0.20 | 0.27 | 0.30 | 47288  | 41510  | 39153  |
| NGA | Nigeria | 23108 | Jalingo  | 0.20 | 0.27 | 0.30 | 137563 | 120756 | 113899 |
| NGA | Nigeria | 23109 | Karim-la | 0.20 | 0.27 | 0.30 | 130497 | 114553 | 108049 |
| NGA | Nigeria | 23110 | Lau      | 0.20 | 0.27 | 0.30 | 40682  | 35711  | 33684  |

|     |         |         |                     |      |      |      |         |         |         |
|-----|---------|---------|---------------------|------|------|------|---------|---------|---------|
| NGA | Nigeria | 23111   | Sardauna            | 0.20 | 0.27 | 0.30 | 235867  | 207050  | 195293  |
| NGA | Nigeria | 23112   | Takum               | 0.20 | 0.27 | 0.30 | 137546  | 120742  | 113886  |
| NGA | Nigeria | 23113   | Wukari              | 0.20 | 0.27 | 0.30 | 201008  | 176450  | 166431  |
| NGA | Nigeria | 23114   | Yorro               | 0.20 | 0.27 | 0.30 | 164428  | 144339  | 136144  |
| NGA | Nigeria | 23115   | Zing                | 0.20 | 0.27 | 0.30 | 95521   | 83851   | 79090   |
| NGA | Nigeria | 23116   | Bade                | 0.13 | 0.13 | 0.13 | 412764  | 412764  | 412764  |
| NGA | Nigeria | 23117   | Damaturu            | 0.13 | 0.13 | 0.13 | 229273  | 229273  | 229273  |
| NGA | Nigeria | 23118   | Fika                | 0.13 | 0.13 | 0.13 | 177115  | 177115  | 177115  |
| NGA | Nigeria | 23119   | Fune                | 0.13 | 0.13 | 0.13 | 257392  | 257392  | 257392  |
| NGA | Nigeria | 23120   | Geidam              | 0.13 | 0.13 | 0.13 | 135349  | 135349  | 135349  |
| NGA | Nigeria | 23121   | Gujba               | 0.13 | 0.13 | 0.13 | 168499  | 168499  | 168499  |
| NGA | Nigeria | 23122   | Nangere             | 0.13 | 0.13 | 0.13 | 294709  | 294709  | 294709  |
| NGA | Nigeria | 23123   | Nguru               | 0.13 | 0.13 | 0.13 | 221141  | 221141  | 221141  |
| NGA | Nigeria | 23124   | Yunusari            | 0.13 | 0.13 | 0.13 | 100615  | 100615  | 100615  |
| NGA | Nigeria | 23125   | Yusufari            | 0.13 | 0.13 | 0.13 | 83990   | 83990   | 83990   |
| PAN | Panama  | 23719   | Colon               | 0.16 | 0.16 | 0.16 | 88361   | 88361   | 88361   |
| PAN | Panama  | 23721   | Portobelo           | 0.16 | 0.16 | 0.16 | 24418   | 24418   | 24418   |
| PAN | Panama  | 23722   | Santa Isabel        | 0.16 | 0.16 | 0.16 | 6679    | 6679    | 6679    |
| PAN | Panama  | 23723   | Comarca De San Blas | 0.16 | 0.16 | 0.16 | 21507   | 21507   | 21507   |
| PAN | Panama  | 23724   | Cemaco              | 0.16 | 0.16 | 0.16 | 5956    | 5956    | 5956    |
| PAN | Panama  | 23725   | Chepigana           | 0.16 | 0.16 | 0.16 | 22334   | 22334   | 22334   |
| PAN | Panama  | 23726   | Pinogana            | 0.16 | 0.16 | 0.16 | 13469   | 13469   | 13469   |
| PAN | Panama  | 23727   | Sambu               | 0.00 | 0.00 | 0.00 | 2707    | 2707    | 2707    |
| PAN | Panama  | 23746   | Chepo               | 0.16 | 0.16 | 0.16 | 37480   | 37480   | 37480   |
| PAN | Panama  | 23747   | Chiman              | 0.16 | 0.16 | 0.16 | 2634    | 2634    | 2634    |
| PAN | Panama  | 23749   | Panama              | 0.16 | 0.16 | 0.16 | 770227  | 770227  | 770227  |
| PER | Peru    | 1011922 | CARAVELI            | 0.15 | 0.15 | 0.15 | 29156   | 29156   | 29156   |
| PER | Peru    | 1011848 | SAN PABLO           | 0.15 | 0.15 | 0.15 | 16107   | 16107   | 16107   |
| PER | Peru    | 1011849 | LIMA                | 0.15 | 0.15 | 0.15 | 5878766 | 5878766 | 5878766 |
| PER | Peru    | 1011850 | OXAPAMPA            | 0.51 | 0.77 | 0.92 | 28519   | 2634    | 0       |
| PER | Peru    | 1011851 | CALLAO              | 0.15 | 0.15 | 0.15 | 470454  | 470454  | 470454  |
| PER | Peru    | 1011854 | LA UNION            | 0.15 | 0.15 | 0.15 | 9560    | 9560    | 9560    |
| PER | Peru    | 1011855 | CASTILLA            | 0.15 | 0.15 | 0.15 | 31649   | 31649   | 31649   |

|     |      |         |                      |      |      |      |        |        |        |
|-----|------|---------|----------------------|------|------|------|--------|--------|--------|
| PER | Peru | 1011857 | SANTIAGO DE CHUCO    | 0.15 | 0.15 | 0.15 | 40309  | 40309  | 40309  |
| PER | Peru | 1011860 | CANAS                | 0.15 | 0.15 | 0.15 | 24368  | 24368  | 24368  |
| PER | Peru | 1011863 | MANU                 | 0.32 | 0.68 | 0.88 | 14209  | 3642   | 0      |
| PER | Peru | 1011864 | ANDAHUAYLAS          | 0.15 | 0.15 | 0.15 | 100203 | 100203 | 100203 |
| PER | Peru | 1011866 | MARISCAL LUZURIAGA   | 0.15 | 0.15 | 0.15 | 14987  | 14987  | 14987  |
| PER | Peru | 1011867 | VIRU                 | 0.15 | 0.15 | 0.15 | 78279  | 78279  | 78279  |
| PER | Peru | 1011868 | CANTA                | 0.15 | 0.15 | 0.15 | 13813  | 13813  | 13813  |
| PER | Peru | 1011869 | TOCACHE              | 0.32 | 0.68 | 0.88 | 35197  | 9022   | 0      |
| PER | Peru | 1011872 | LA CONVENCION        | 0.32 | 0.68 | 0.88 | 83410  | 21380  | 0      |
| PER | Peru | 1011873 | TAYACAJA             | 0.32 | 0.68 | 0.88 | 53977  | 13835  | 0      |
| PER | Peru | 1011874 | HUANCAYO             | 0.15 | 0.15 | 0.15 | 334116 | 334116 | 334116 |
| PER | Peru | 1011878 | VICTOR FAJARDO       | 0.15 | 0.15 | 0.15 | 16220  | 16220  | 16220  |
| PER | Peru | 1011880 | PUERTO INCA          | 0.32 | 0.68 | 0.88 | 14797  | 3793   | 0      |
| PER | Peru | 1011881 | CHINCHA              | 0.15 | 0.15 | 0.15 | 144815 | 144815 | 144815 |
| PER | Peru | 1011883 | YAROWILCA            | 0.15 | 0.15 | 0.15 | 21065  | 21065  | 21065  |
| PER | Peru | 1011886 | SANDIA               | 0.32 | 0.68 | 0.88 | 32530  | 8338   | 0      |
| PER | Peru | 1011887 | PISCO                | 0.15 | 0.15 | 0.15 | 91739  | 91739  | 91739  |
| PER | Peru | 1011888 | SAN ANTONIO DE PUTIN | 0.15 | 0.15 | 0.15 | 45890  | 45890  | 45890  |
| PER | Peru | 1011892 | ESPINAR              | 0.15 | 0.15 | 0.15 | 42664  | 42664  | 42664  |
| PER | Peru | 1011893 | HUAURA               | 0.15 | 0.15 | 0.15 | 143013 | 143013 | 143013 |
| PER | Peru | 1011897 | MAYNAS               | 0.33 | 0.69 | 0.88 | 426970 | 98284  | 0      |
| PER | Peru | 1011898 | HUANTA               | 0.32 | 0.68 | 0.88 | 55877  | 14322  | 0      |
| PER | Peru | 1011900 | GRAN CHIMU           | 0.15 | 0.15 | 0.15 | 20178  | 20178  | 20178  |
| PER | Peru | 1011901 | AZANGARO             | 0.15 | 0.15 | 0.15 | 87902  | 87902  | 87902  |
| PER | Peru | 1011920 | SAN MARCOS           | 0.15 | 0.15 | 0.15 | 34080  | 34080  | 34080  |
| PER | Peru | 1011924 | SIHUAS               | 0.15 | 0.15 | 0.15 | 19339  | 19339  | 19339  |
| PER | Peru | 1011925 | CELENDIN             | 0.15 | 0.15 | 0.15 | 59896  | 59896  | 59896  |
| PER | Peru | 1011926 | TARMA                | 0.51 | 0.77 | 0.92 | 31579  | 2916   | 0      |
| PER | Peru | 1011927 | CHURCAMPA            | 0.32 | 0.68 | 0.88 | 22221  | 5696   | 0      |
| PER | Peru | 1011930 | CAJATAMBO            | 0.15 | 0.15 | 0.15 | 5268   | 5268   | 5268   |
| PER | Peru | 1011933 | CHACHAPOYAS          | 0.32 | 0.68 | 0.88 | 25310  | 6487   | 0      |
| PER | Peru | 1011935 | TAHUAMANU            | 0.32 | 0.68 | 0.88 | 6891   | 1766   | 0      |
| PER | Peru | 1011936 | MOYOBAMBA            | 0.32 | 0.68 | 0.88 | 72732  | 18643  | 0      |



|     |      |         |                      |      |      |      |        |        |        |
|-----|------|---------|----------------------|------|------|------|--------|--------|--------|
| PER | Peru | 1011938 | CAJABAMBA            | 0.15 | 0.15 | 0.15 | 49714  | 49714  | 49714  |
| PER | Peru | 1011940 | YAUUYOS              | 0.15 | 0.15 | 0.15 | 18643  | 18643  | 18643  |
| PER | Peru | 1011943 | RECUAY               | 0.15 | 0.15 | 0.15 | 12663  | 12663  | 12663  |
| PER | Peru | 1011945 | PACASMAYO            | 0.15 | 0.15 | 0.15 | 65276  | 65276  | 65276  |
| PER | Peru | 1011961 | TACNA                | 0.15 | 0.15 | 0.15 | 206800 | 206800 | 206800 |
| PER | Peru | 1011962 | CARLOS F. FITZCARRAL | 0.15 | 0.15 | 0.15 | 13752  | 13752  | 13752  |
| PER | Peru | 1011965 | ANTA                 | 0.15 | 0.15 | 0.15 | 35853  | 35853  | 35853  |
| PER | Peru | 1011966 | EL COLLAO            | 0.15 | 0.15 | 0.15 | 54080  | 54080  | 54080  |
| PER | Peru | 1011968 | JULCAN               | 0.15 | 0.15 | 0.15 | 20413  | 20413  | 20413  |
| PER | Peru | 1011969 | BARRANCA             | 0.15 | 0.15 | 0.15 | 94141  | 94141  | 94141  |
| PER | Peru | 1011970 | FERREÑAFE            | 0.32 | 0.68 | 0.88 | 49627  | 12720  | 0      |
| PER | Peru | 1011971 | AJJA                 | 0.15 | 0.15 | 0.15 | 5174   | 5174   | 5174   |
| PER | Peru | 1011977 | EL DORADO            | 0.32 | 0.68 | 0.88 | 21374  | 5478   | 0      |
| PER | Peru | 1011978 | CAMANA               | 0.15 | 0.15 | 0.15 | 44773  | 44773  | 44773  |
| PER | Peru | 1011979 | ISLAY                | 0.15 | 0.15 | 0.15 | 35154  | 35154  | 35154  |
| PER | Peru | 1011980 | MORROPON             | 0.32 | 0.68 | 0.88 | 74668  | 19139  | 0      |
| PER | Peru | 1011981 | SATIPO               | 0.51 | 0.77 | 0.92 | 87266  | 8059   | 0      |
| PER | Peru | 1011985 | SULLANA              | 0.32 | 0.68 | 0.88 | 154486 | 39598  | 0      |
| PER | Peru | 1011986 | POMABAMBA            | 0.15 | 0.15 | 0.15 | 18588  | 18588  | 18588  |
| PER | Peru | 1011988 | TRUJILLO             | 0.15 | 0.15 | 0.15 | 630614 | 630614 | 630614 |
| PER | Peru | 1011990 | ANTONIO RAYMONDI     | 0.15 | 0.15 | 0.15 | 10253  | 10253  | 10253  |
| PER | Peru | 1011991 | CUTERVO              | 0.32 | 0.68 | 0.88 | 63947  | 16391  | 0      |
| PER | Peru | 1012011 | GENERAL SANCHEZ CERR | 0.15 | 0.15 | 0.15 | 19358  | 19358  | 19358  |
| PER | Peru | 1012012 | CORONEL PORTILLO     | 0.32 | 0.68 | 0.88 | 194589 | 49877  | 0      |
| PER | Peru | 1012013 | MARISCAL RAMON CASTI | 0.32 | 0.68 | 0.88 | 34178  | 8760   | 0      |
| PER | Peru | 1012014 | CHUCUITO             | 0.15 | 0.15 | 0.15 | 104949 | 104949 | 104949 |
| PER | Peru | 1012015 | MARISCAL NIETO       | 0.15 | 0.15 | 0.15 | 53690  | 53690  | 53690  |
| PER | Peru | 1012016 | OCROS                | 0.15 | 0.15 | 0.15 | 8598   | 8598   | 8598   |
| PER | Peru | 1012018 | HUARMEY              | 0.15 | 0.15 | 0.15 | 19914  | 19914  | 19914  |
| PER | Peru | 1012019 | SAN ROMAN            | 0.15 | 0.15 | 0.15 | 186461 | 186461 | 186461 |
| PER | Peru | 1012021 | CARHUAZ              | 0.15 | 0.15 | 0.15 | 29993  | 29993  | 29993  |
| PER | Peru | 1012022 | AMBO                 | 0.15 | 0.15 | 0.15 | 37128  | 37128  | 37128  |
| PER | Peru | 1012023 | PALLASCA             | 0.15 | 0.15 | 0.15 | 19699  | 19699  | 19699  |

|     |      |         |                  |      |      |      |        |        |        |
|-----|------|---------|------------------|------|------|------|--------|--------|--------|
| PER | Peru | 1012025 | PAITA            | 0.32 | 0.68 | 0.88 | 63893  | 16377  | 0      |
| PER | Peru | 1012038 | REQUENA          | 0.33 | 0.69 | 0.88 | 34091  | 7847   | 0      |
| PER | Peru | 1012039 | HUARI            | 0.15 | 0.15 | 0.15 | 40434  | 40434  | 40434  |
| PER | Peru | 1012040 | ATALAYA          | 0.32 | 0.68 | 0.88 | 27015  | 6924   | 0      |
| PER | Peru | 1012041 | UTCUBAMBA        | 0.32 | 0.68 | 0.88 | 53537  | 13723  | 0      |
| PER | Peru | 1012043 | ANTABAMBA        | 0.15 | 0.15 | 0.15 | 8040   | 8040   | 8040   |
| PER | Peru | 1012044 | CHUMBIVILCAS     | 0.15 | 0.15 | 0.15 | 50937  | 50937  | 50937  |
| PER | Peru | 1012045 | HUAROCHIRI       | 0.15 | 0.15 | 0.15 | 78721  | 78721  | 78721  |
| PER | Peru | 1012047 | MARISCAL CACERES | 0.32 | 0.68 | 0.88 | 24652  | 6319   | 0      |
| PER | Peru | 1012049 | MELGAR           | 0.15 | 0.15 | 0.15 | 49671  | 49671  | 49671  |
| PER | Peru | 1012051 | SANTA            | 0.15 | 0.15 | 0.15 | 275248 | 275248 | 275248 |
| PER | Peru | 1012052 | SAN IGNACIO      | 0.32 | 0.68 | 0.88 | 67531  | 17310  | 0      |
| PER | Peru | 1012053 | CONTUMAZA        | 0.15 | 0.15 | 0.15 | 20707  | 20707  | 20707  |
| PER | Peru | 1012055 | PASCO            | 0.15 | 0.15 | 0.15 | 109250 | 109250 | 109250 |
| PER | Peru | 1012057 | BAGUA            | 0.32 | 0.68 | 0.88 | 34578  | 8863   | 0      |
| PER | Peru | 1012058 | PACHITEA         | 0.32 | 0.68 | 0.88 | 33365  | 8552   | 0      |
| PER | Peru | 1011823 | VILCAS HUAMAN    | 0.15 | 0.15 | 0.15 | 15978  | 15978  | 15978  |
| PER | Peru | 1011824 | QUISPICANCHI     | 0.32 | 0.68 | 0.88 | 42144  | 10802  | 0      |
| PER | Peru | 1011826 | HUAMANGA         | 0.15 | 0.15 | 0.15 | 176626 | 176626 | 176626 |
| PER | Peru | 1011827 | ILO              | 0.15 | 0.15 | 0.15 | 46285  | 46285  | 46285  |
| PER | Peru | 1011841 | HUANCA SANCOS    | 0.15 | 0.15 | 0.15 | 7023   | 7023   | 7023   |
| PER | Peru | 1011844 | CANDARAVE        | 0.15 | 0.15 | 0.15 | 5106   | 5106   | 5106   |
| PER | Peru | 1011862 | PALPA            | 0.15 | 0.15 | 0.15 | 8069   | 8069   | 8069   |
| PER | Peru | 1011877 | HUANCAVELICA     | 0.15 | 0.15 | 0.15 | 104796 | 104796 | 104796 |
| PER | Peru | 1011894 | SANTA CRUZ       | 0.32 | 0.68 | 0.88 | 20960  | 5372   | 0      |
| PER | Peru | 1011905 | CHANCHAMAYO      | 0.32 | 0.68 | 0.88 | 103810 | 26609  | 0      |
| PER | Peru | 1011948 | CARABAYA         | 0.32 | 0.68 | 0.88 | 48822  | 12514  | 0      |
| PER | Peru | 1011952 | BONGARA          | 0.32 | 0.68 | 0.88 | 15715  | 4028   | 0      |
| PER | Peru | 1011958 | LA MAR           | 0.32 | 0.68 | 0.88 | 45061  | 11550  | 0      |
| PER | Peru | 1011976 | TARATA           | 0.15 | 0.15 | 0.15 | 5309   | 5309   | 5309   |
| PER | Peru | 1011982 | SAN MARTIN       | 0.32 | 0.68 | 0.88 | 94121  | 24125  | 0      |
| PER | Peru | 1011983 | CORONGO          | 0.15 | 0.15 | 0.15 | 5355   | 5355   | 5355   |
| PER | Peru | 1011984 | RIOJA            | 0.32 | 0.68 | 0.88 | 63709  | 16330  | 0      |

|     |      |         |                      |      |      |      |        |        |        |
|-----|------|---------|----------------------|------|------|------|--------|--------|--------|
| PER | Peru | 1012000 | URUBAMBA             | 0.15 | 0.15 | 0.15 | 40906  | 40906  | 40906  |
| PER | Peru | 1012028 | MOHO                 | 0.15 | 0.15 | 0.15 | 14014  | 14014  | 14014  |
| PER | Peru | 1011833 | HUACAYBAMBA          | 0.32 | 0.68 | 0.88 | 10555  | 2705   | 0      |
| PER | Peru | 1011836 | CAJAMARCA            | 0.15 | 0.15 | 0.15 | 246031 | 246031 | 246031 |
| PER | Peru | 1011871 | LAMPA                | 0.15 | 0.15 | 0.15 | 38880  | 38880  | 38880  |
| PER | Peru | 1011876 | JUNIN                | 0.32 | 0.68 | 0.88 | 12430  | 3186   | 0      |
| PER | Peru | 1011879 | CHEPEN               | 0.15 | 0.15 | 0.15 | 56804  | 56804  | 56804  |
| PER | Peru | 1011891 | GRAU                 | 0.15 | 0.15 | 0.15 | 15752  | 15752  | 15752  |
| PER | Peru | 1011904 | TUMBES               | 0.32 | 0.68 | 0.88 | 73812  | 18919  | 0      |
| PER | Peru | 1011913 | JAUJA                | 0.15 | 0.15 | 0.15 | 56215  | 56215  | 56215  |
| PER | Peru | 1011921 | SUCRE                | 0.15 | 0.15 | 0.15 | 8247   | 8247   | 8247   |
| PER | Peru | 1011923 | YUNGUYO              | 0.15 | 0.15 | 0.15 | 29679  | 29679  | 29679  |
| PER | Peru | 1011931 | PAUCARTAMBO          | 0.32 | 0.68 | 0.88 | 23461  | 6013   | 0      |
| PER | Peru | 1011820 | LUYA                 | 0.32 | 0.68 | 0.88 | 23969  | 6144   | 0      |
| PER | Peru | 1011834 | PADRE ABAD           | 0.32 | 0.68 | 0.88 | 30120  | 7720   | 0      |
| PER | Peru | 1011843 | HUANCABAMBA          | 0.32 | 0.68 | 0.88 | 60612  | 15536  | 0      |
| PER | Peru | 1011852 | LAMAS                | 0.32 | 0.68 | 0.88 | 42773  | 10964  | 0      |
| PER | Peru | 1011853 | CHOTA                | 0.32 | 0.68 | 0.88 | 75650  | 19391  | 0      |
| PER | Peru | 1011865 | DOS DE MAYO          | 0.15 | 0.15 | 0.15 | 35476  | 35476  | 35476  |
| PER | Peru | 1011912 | AYMARAES             | 0.15 | 0.15 | 0.15 | 19745  | 19745  | 19745  |
| PER | Peru | 1011914 | CONTRALMIRANTE VILLA | 0.32 | 0.68 | 0.88 | 9620   | 2466   | 0      |
| PER | Peru | 1011932 | ACOMAYO              | 0.15 | 0.15 | 0.15 | 17190  | 17190  | 17190  |
| PER | Peru | 1011942 | RODRIGUEZ DE MENDO   | 0.32 | 0.68 | 0.88 | 16184  | 4148   | 0      |
| PER | Peru | 1011944 | UCAYALI              | 0.32 | 0.68 | 0.88 | 36431  | 9338   | 0      |
| PER | Peru | 1011974 | TAMBOPATA            | 0.32 | 0.68 | 0.88 | 48868  | 12526  | 0      |
| PER | Peru | 1012017 | AYABACA              | 0.32 | 0.68 | 0.88 | 68762  | 17625  | 0      |
| PER | Peru | 1012036 | PUNO                 | 0.15 | 0.15 | 0.15 | 157588 | 157588 | 157588 |
| PER | Peru | 1012037 | CAYLLOMA             | 0.15 | 0.15 | 0.15 | 73844  | 73844  | 73844  |
| PER | Peru | 1011801 | SANCHEZ CARRION      | 0.15 | 0.15 | 0.15 | 99855  | 99855  | 99855  |
| PER | Peru | 1011804 | PIURA                | 0.32 | 0.68 | 0.88 | 368655 | 94494  | 0      |
| PER | Peru | 1011809 | HUARAZ               | 0.15 | 0.15 | 0.15 | 106116 | 106116 | 106116 |
| PER | Peru | 1011847 | HUAYTARA             | 0.15 | 0.15 | 0.15 | 15822  | 15822  | 15822  |
| PER | Peru | 1011856 | ABANCAY              | 0.15 | 0.15 | 0.15 | 62352  | 62352  | 62352  |

|     |      |         |                |      |      |      |        |        |        |
|-----|------|---------|----------------|------|------|------|--------|--------|--------|
| PER | Peru | 1011957 | HUAMALIES      | 0.32 | 0.68 | 0.88 | 38131  | 9774   | 0      |
| PER | Peru | 1011964 | PURUS          | 0.32 | 0.68 | 0.88 | 2246   | 576    | 0      |
| PER | Peru | 1011967 | COTABAMBAS     | 0.15 | 0.15 | 0.15 | 30811  | 30811  | 30811  |
| PER | Peru | 1011996 | LAMBAYEQUE     | 0.32 | 0.68 | 0.88 | 141928 | 36379  | 0      |
| PER | Peru | 1011998 | ANGARAES       | 0.15 | 0.15 | 0.15 | 45967  | 45967  | 45967  |
| PER | Peru | 1011802 | YUNGAY         | 0.15 | 0.15 | 0.15 | 37502  | 37502  | 37502  |
| PER | Peru | 1011805 | ACOBAMBA       | 0.15 | 0.15 | 0.15 | 54946  | 54946  | 54946  |
| PER | Peru | 1011806 | CALCA          | 0.32 | 0.68 | 0.88 | 35778  | 9171   | 0      |
| PER | Peru | 1011811 | CUSCO          | 0.15 | 0.15 | 0.15 | 288578 | 288578 | 288578 |
| PER | Peru | 1011812 | CAÑETE         | 0.15 | 0.15 | 0.15 | 152620 | 152620 | 152620 |
| PER | Peru | 1011813 | YAULI          | 0.15 | 0.15 | 0.15 | 28331  | 28331  | 28331  |
| PER | Peru | 1011816 | CANGALLO       | 0.15 | 0.15 | 0.15 | 22645  | 22645  | 22645  |
| PER | Peru | 1011819 | ICA            | 0.15 | 0.15 | 0.15 | 240972 | 240972 | 240972 |
| PER | Peru | 1011821 | OYON           | 0.15 | 0.15 | 0.15 | 14673  | 14673  | 14673  |
| PER | Peru | 1011822 | CONDESUYOS     | 0.15 | 0.15 | 0.15 | 12530  | 12530  | 12530  |
| PER | Peru | 1011825 | HUALLAGA       | 0.32 | 0.68 | 0.88 | 12909  | 3309   | 0      |
| PER | Peru | 1011828 | CONCEPCION     | 0.15 | 0.15 | 0.15 | 37425  | 37425  | 37425  |
| PER | Peru | 1011830 | CASTROVIRREYNA | 0.15 | 0.15 | 0.15 | 12901  | 12901  | 12901  |
| PER | Peru | 1011831 | JAEN           | 0.32 | 0.68 | 0.88 | 91769  | 23522  | 0      |
| PER | Peru | 1011835 | SECHURA        | 0.32 | 0.68 | 0.88 | 37051  | 9497   | 0      |
| PER | Peru | 1011837 | JORGE BASADRE  | 0.15 | 0.15 | 0.15 | 6438   | 6438   | 6438   |
| PER | Peru | 1011838 | PARINACOCHAS   | 0.15 | 0.15 | 0.15 | 23533  | 23533  | 23533  |
| PER | Peru | 1011839 | LEONCIO PRADO  | 0.32 | 0.68 | 0.88 | 60663  | 15549  | 0      |
| PER | Peru | 1011840 | BOLOGNESI      | 0.15 | 0.15 | 0.15 | 23053  | 23053  | 23053  |
| PER | Peru | 1011845 | AREQUIPA       | 0.15 | 0.15 | 0.15 | 652112 | 652112 | 652112 |
| PER | Peru | 1011902 | CHINCHEROS     | 0.32 | 0.68 | 0.88 | 25333  | 6493   | 0      |
| PER | Peru | 1011903 | LORETO         | 0.32 | 0.68 | 0.88 | 34902  | 8946   | 0      |
| PER | Peru | 1011906 | HUARAL         | 0.15 | 0.15 | 0.15 | 124038 | 124038 | 124038 |
| PER | Peru | 1011910 | MARAYON        | 0.32 | 0.68 | 0.88 | 15776  | 4044   | 0      |
| PER | Peru | 1011911 | OTUZCO         | 0.15 | 0.15 | 0.15 | 58802  | 58802  | 58802  |
| PER | Peru | 1011917 | TALARA         | 0.32 | 0.68 | 0.88 | 63208  | 16201  | 0      |
| PER | Peru | 1011918 | ZARUMILLA      | 0.32 | 0.68 | 0.88 | 26093  | 6688   | 0      |
| PER | Peru | 1011919 | HUAYLAS        | 0.15 | 0.15 | 0.15 | 36393  | 36393  | 36393  |

|     |          |         |                          |      |      |      |        |        |       |
|-----|----------|---------|--------------------------|------|------|------|--------|--------|-------|
| PER | Peru     | 1011946 | HUANCANE                 | 0.15 | 0.15 | 0.15 | 41471  | 41471  | 41471 |
| PER | Peru     | 1011950 | CHUPACA                  | 0.15 | 0.15 | 0.15 | 35855  | 35855  | 35855 |
| PER | Peru     | 1011951 | DANIEL ALCIDES CARRI     | 0.15 | 0.15 | 0.15 | 38148  | 38148  | 38148 |
| PER | Peru     | 1011953 | CANCHIS                  | 0.15 | 0.15 | 0.15 | 62924  | 62924  | 62924 |
| PER | Peru     | 1011954 | PARURO                   | 0.15 | 0.15 | 0.15 | 20887  | 20887  | 20887 |
| PER | Peru     | 1011956 | LAURICOCHA               | 0.15 | 0.15 | 0.15 | 23254  | 23254  | 23254 |
| PER | Peru     | 1011959 | BOLIVAR                  | 0.32 | 0.68 | 0.88 | 7923   | 2031   | 0     |
| PER | Peru     | 1011992 | ALTO AMAZONAS            | 0.32 | 0.68 | 0.88 | 90263  | 23136  | 0     |
| PER | Peru     | 1011993 | ASUNCION                 | 0.15 | 0.15 | 0.15 | 5795   | 5795   | 5795  |
| PER | Peru     | 1011997 | SAN MIGUEL               | 0.15 | 0.15 | 0.15 | 35004  | 35004  | 35004 |
| PER | Peru     | 1011999 | PICOTA                   | 0.32 | 0.68 | 0.88 | 22067  | 5656   | 0     |
| PER | Peru     | 1012003 | NAZCA                    | 0.15 | 0.15 | 0.15 | 39035  | 39035  | 39035 |
| PER | Peru     | 1012005 | CASMA                    | 0.15 | 0.15 | 0.15 | 30180  | 30180  | 30180 |
| PER | Peru     | 1012006 | PAUCAR DEL SARA SARA     | 0.15 | 0.15 | 0.15 | 7534   | 7534   | 7534  |
| PER | Peru     | 1012008 | ASCOPE                   | 0.15 | 0.15 | 0.15 | 77762  | 77762  | 77762 |
| PER | Peru     | 1012027 | CHICLAYO                 | 0.32 | 0.68 | 0.88 | 395021 | 101252 | 0     |
| PER | Peru     | 1012029 | CONDORCANQUI             | 0.32 | 0.68 | 0.88 | 24890  | 6380   | 0     |
| PER | Peru     | 1012030 | HUANUCO                  | 0.32 | 0.68 | 0.88 | 141301 | 36218  | 0     |
| PER | Peru     | 1012031 | PATAZ                    | 0.32 | 0.68 | 0.88 | 42655  | 10933  | 0     |
| PER | Peru     | 1012032 | LUCANAS                  | 0.15 | 0.15 | 0.15 | 48073  | 48073  | 48073 |
| PER | Peru     | 1012033 | HUALGAYOC                | 0.15 | 0.15 | 0.15 | 63027  | 63027  | 63027 |
| PER | Peru     | 1012034 | BELLAVISTA               | 0.33 | 0.69 | 0.88 | 30936  | 7121   | 0     |
| PER | Peru     | 68764   | Admin unit not available | 0.15 | 0.15 | 0.15 | 673    | 673    | 673   |
| PER | Peru     | 24177   | Admin unit not available | 0.15 | 0.15 | 0.15 | 2446   | 2446   | 2446  |
| PRY | Paraguay | 23785   | Fuerte Olimpo            | 0.73 | 0.73 | 0.74 | 163    | 152    | 128   |
| PRY | Paraguay | 23786   | La Victoria              | 0.73 | 0.73 | 0.74 | 450    | 418    | 353   |
| PRY | Paraguay | 23787   | Mayor Pablo La Gerenza   | 0.73 | 0.73 | 0.74 | 320    | 298    | 251   |
| PRY | Paraguay | 23788   | Ciudad Del Este          | 0.73 | 0.73 | 0.74 | 20862  | 19406  | 16366 |
| PRY | Paraguay | 23789   | D. M. Irala              | 0.73 | 0.73 | 0.74 | 908    | 845    | 712   |
| PRY | Paraguay | 23790   | Hernandarias             | 0.73 | 0.73 | 0.74 | 7454   | 6933   | 5847  |
| PRY | Paraguay | 23791   | Itakyry                  | 0.73 | 0.73 | 0.74 | 2600   | 2419   | 2040  |
| PRY | Paraguay | 23792   | J.e. Oleary              | 0.73 | 0.73 | 0.74 | 1745   | 1624   | 1369  |
| PRY | Paraguay | 23793   | Los Cedrales             | 0.73 | 0.73 | 0.74 | 1481   | 1378   | 1162  |

|     |          |       |                         |      |      |      |      |      |      |
|-----|----------|-------|-------------------------|------|------|------|------|------|------|
| PRY | Paraguay | 23794 | Mallorquin              | 0.73 | 0.73 | 0.74 | 1795 | 1670 | 1409 |
| PRY | Paraguay | 23795 | Mbaracayu               | 0.73 | 0.73 | 0.74 | 1248 | 1161 | 979  |
| PRY | Paraguay | 23796 | Minga Guazu             | 0.73 | 0.73 | 0.74 | 5110 | 4754 | 4009 |
| PRY | Paraguay | 23797 | Minga Pora              | 0.73 | 0.73 | 0.74 | 1350 | 1256 | 1059 |
| PRY | Paraguay | 23798 | Nacunday                | 0.73 | 0.73 | 0.74 | 1532 | 1425 | 1201 |
| PRY | Paraguay | 23799 | Naranjal                | 0.73 | 0.73 | 0.74 | 1109 | 1031 | 870  |
| PRY | Paraguay | 23800 | Pte. Franco             | 0.73 | 0.73 | 0.74 | 5133 | 4775 | 4027 |
| PRY | Paraguay | 23801 | San Alberto             | 0.73 | 0.73 | 0.74 | 1429 | 1330 | 1121 |
| PRY | Paraguay | 23802 | San Cristobal           | 0.73 | 0.73 | 0.74 | 919  | 855  | 721  |
| PRY | Paraguay | 23803 | Santa Rita              | 0.73 | 0.73 | 0.74 | 1499 | 1394 | 1176 |
| PRY | Paraguay | 23804 | Santa Rosa              | 0.73 | 0.73 | 0.74 | 1440 | 1339 | 1129 |
| PRY | Paraguay | 23805 | Yguazu                  | 0.73 | 0.73 | 0.74 | 1156 | 1075 | 907  |
| PRY | Paraguay | 23806 | Bella Vista             | 0.73 | 0.73 | 0.74 | 802  | 746  | 629  |
| PRY | Paraguay | 23807 | Capitan Bado            | 0.73 | 0.73 | 0.74 | 1381 | 1284 | 1083 |
| PRY | Paraguay | 23808 | Pedro Juan Caballero    | 0.73 | 0.73 | 0.74 | 6770 | 6298 | 5311 |
| PRY | Paraguay | 23809 | Gral. Eugenio A. Garay  | 0.73 | 0.73 | 0.74 | 2189 | 2036 | 1717 |
| PRY | Paraguay | 23810 | Mcal. Estigarribia      | 0.73 | 0.73 | 0.74 | 665  | 618  | 521  |
| PRY | Paraguay | 23811 | Pedro P. Pena           | 0.73 | 0.73 | 0.74 | 1685 | 1568 | 1322 |
| PRY | Paraguay | 23812 | 3 De Febrero            | 0.73 | 0.73 | 0.74 | 637  | 593  | 500  |
| PRY | Paraguay | 23813 | Caaguazu                | 0.73 | 0.73 | 0.74 | 7269 | 6761 | 5702 |
| PRY | Paraguay | 23814 | Carayao                 | 0.73 | 0.73 | 0.74 | 1119 | 1041 | 878  |
| PRY | Paraguay | 23815 | Cecilio Baez            | 0.73 | 0.73 | 0.74 | 447  | 416  | 351  |
| PRY | Paraguay | 23816 | Coronel Oviedo          | 0.73 | 0.73 | 0.74 | 5983 | 5566 | 4694 |
| PRY | Paraguay | 23817 | J.e. Estigarribia       | 0.73 | 0.73 | 0.74 | 1764 | 1641 | 1384 |
| PRY | Paraguay | 23818 | Jose D. Ocampos         | 0.73 | 0.73 | 0.74 | 689  | 641  | 540  |
| PRY | Paraguay | 23819 | Juan M. Frutos          | 0.73 | 0.73 | 0.74 | 1599 | 1487 | 1254 |
| PRY | Paraguay | 23820 | La Pastora              | 0.73 | 0.73 | 0.74 | 387  | 360  | 304  |
| PRY | Paraguay | 23821 | Mcal. Fco. Solano Lopez | 0.73 | 0.73 | 0.74 | 688  | 640  | 540  |
| PRY | Paraguay | 23822 | Nueva Londres           | 0.73 | 0.73 | 0.74 | 356  | 331  | 280  |
| PRY | Paraguay | 23823 | R.i. 3 Corrales         | 0.73 | 0.73 | 0.74 | 716  | 666  | 561  |
| PRY | Paraguay | 23824 | Raul A. Oviedo          | 0.73 | 0.73 | 0.74 | 2300 | 2139 | 1804 |
| PRY | Paraguay | 23825 | Repatriacion            | 0.73 | 0.73 | 0.74 | 2292 | 2132 | 1798 |
| PRY | Paraguay | 23826 | San Joaquin             | 0.73 | 0.73 | 0.74 | 1292 | 1202 | 1014 |

|     |          |       |                         |      |      |      |       |       |       |
|-----|----------|-------|-------------------------|------|------|------|-------|-------|-------|
| PRY | Paraguay | 23827 | San Jose De Los Arroyos | 0.73 | 0.73 | 0.74 | 1266  | 1177  | 993   |
| PRY | Paraguay | 23828 | Santa Rosa Del Mbutuy   | 0.73 | 0.73 | 0.74 | 884   | 822   | 694   |
| PRY | Paraguay | 23829 | Simon Bolivar           | 0.73 | 0.73 | 0.74 | 395   | 368   | 310   |
| PRY | Paraguay | 23830 | Yhu                     | 0.73 | 0.73 | 0.74 | 3208  | 2984  | 2517  |
| PRY | Paraguay | 23831 | Abai                    | 0.73 | 0.73 | 0.74 | 1791  | 1666  | 1405  |
| PRY | Paraguay | 23832 | Buena Vista             | 0.73 | 0.73 | 0.74 | 401   | 373   | 315   |
| PRY | Paraguay | 23833 | Caazapa                 | 0.73 | 0.73 | 0.74 | 1631  | 1517  | 1280  |
| PRY | Paraguay | 23834 | Dr. Moises Bertoni      | 0.73 | 0.73 | 0.74 | 348   | 324   | 273   |
| PRY | Paraguay | 23835 | Fulgencio Yegros        | 0.73 | 0.73 | 0.74 | 482   | 449   | 378   |
| PRY | Paraguay | 23836 | Gral. Higinio Morinigo  | 0.73 | 0.73 | 0.74 | 437   | 407   | 343   |
| PRY | Paraguay | 23837 | Maciel                  | 0.73 | 0.73 | 0.74 | 307   | 286   | 241   |
| PRY | Paraguay | 23838 | San Juan Nepomuceno     | 0.73 | 0.73 | 0.74 | 1822  | 1694  | 1429  |
| PRY | Paraguay | 23839 | Tavai                   | 0.73 | 0.73 | 0.74 | 1060  | 986   | 832   |
| PRY | Paraguay | 23840 | Yuty                    | 0.73 | 0.73 | 0.74 | 2152  | 2002  | 1689  |
| PRY | Paraguay | 23841 | Corpus Christi          | 0.73 | 0.73 | 0.74 | 1576  | 1466  | 1236  |
| PRY | Paraguay | 23842 | Curuguaty               | 0.73 | 0.73 | 0.74 | 5013  | 4663  | 3932  |
| PRY | Paraguay | 23843 | F. Caballero Alvarez    | 0.73 | 0.73 | 0.74 | 4182  | 3890  | 3281  |
| PRY | Paraguay | 23844 | Itanara                 | 0.73 | 0.73 | 0.74 | 202   | 188   | 158   |
| PRY | Paraguay | 23845 | Salto Del Guaira        | 0.73 | 0.73 | 0.74 | 1446  | 1345  | 1134  |
| PRY | Paraguay | 23846 | Villa Igatimi           | 0.73 | 0.73 | 0.74 | 1422  | 1322  | 1115  |
| PRY | Paraguay | 23847 | Ypejhu                  | 0.73 | 0.73 | 0.74 | 550   | 511   | 431   |
| PRY | Paraguay | 23848 | Aregua                  | 0.73 | 0.73 | 0.74 | 6908  | 6426  | 5419  |
| PRY | Paraguay | 23849 | Asuncion                | 0.73 | 0.73 | 0.74 | 34683 | 32262 | 27209 |
| PRY | Paraguay | 23850 | Capiata                 | 0.73 | 0.73 | 0.74 | 18105 | 16842 | 14204 |
| PRY | Paraguay | 23851 | Fdo. De La Mora         | 0.73 | 0.73 | 0.74 | 13756 | 12796 | 10792 |
| PRY | Paraguay | 23852 | Guarambare              | 0.73 | 0.73 | 0.74 | 2358  | 2193  | 1850  |
| PRY | Paraguay | 23853 | Ita                     | 0.73 | 0.73 | 0.74 | 7687  | 7151  | 6031  |
| PRY | Paraguay | 23854 | Itaugua                 | 0.73 | 0.73 | 0.74 | 8325  | 7744  | 6531  |
| PRY | Paraguay | 23855 | J. A. Saldivar          | 0.73 | 0.73 | 0.74 | 5250  | 4884  | 4119  |
| PRY | Paraguay | 23856 | Lambare                 | 0.73 | 0.73 | 0.74 | 14269 | 13273 | 11194 |
| PRY | Paraguay | 23857 | Limpio                  | 0.73 | 0.73 | 0.74 | 7513  | 6989  | 5894  |
| PRY | Paraguay | 23858 | Luque                   | 0.73 | 0.73 | 0.74 | 28520 | 26529 | 22374 |
| PRY | Paraguay | 23859 | M. Roque Alonso         | 0.73 | 0.73 | 0.74 | 7509  | 6984  | 5890  |

|     |          |       |                           |      |      |      |       |       |       |
|-----|----------|-------|---------------------------|------|------|------|-------|-------|-------|
| PRY | Paraguay | 23860 | Nemby                     | 0.73 | 0.73 | 0.74 | 6582  | 6122  | 5163  |
| PRY | Paraguay | 23861 | Nueva Italia              | 0.73 | 0.73 | 0.74 | 1410  | 1311  | 1106  |
| PRY | Paraguay | 23862 | San Antonio               | 0.73 | 0.73 | 0.74 | 2879  | 2678  | 2259  |
| PRY | Paraguay | 23863 | San Lorenzo               | 0.73 | 0.73 | 0.74 | 25139 | 23384 | 19722 |
| PRY | Paraguay | 23864 | Villa Elisa               | 0.73 | 0.73 | 0.74 | 5790  | 5386  | 4542  |
| PRY | Paraguay | 23865 | Villeta                   | 0.73 | 0.73 | 0.74 | 3701  | 3443  | 2904  |
| PRY | Paraguay | 23866 | Ypacarai                  | 0.73 | 0.73 | 0.74 | 3055  | 2842  | 2397  |
| PRY | Paraguay | 23867 | Ypane                     | 0.73 | 0.73 | 0.74 | 3059  | 2845  | 2400  |
| PRY | Paraguay | 23868 | Belen                     | 0.73 | 0.73 | 0.74 | 660   | 614   | 518   |
| PRY | Paraguay | 23869 | Concepcion                | 0.73 | 0.73 | 0.74 | 4427  | 4118  | 3473  |
| PRY | Paraguay | 23870 | Horqueta                  | 0.73 | 0.73 | 0.74 | 3755  | 3493  | 2946  |
| PRY | Paraguay | 23871 | Loreto                    | 0.73 | 0.73 | 0.74 | 1181  | 1098  | 926   |
| PRY | Paraguay | 23872 | San Carlos                | 0.73 | 0.73 | 0.74 | 719   | 669   | 564   |
| PRY | Paraguay | 23873 | San Lazaro                | 0.73 | 0.73 | 0.74 | 585   | 545   | 459   |
| PRY | Paraguay | 23874 | Yby Yau                   | 0.73 | 0.73 | 0.74 | 1490  | 1386  | 1169  |
| PRY | Paraguay | 23875 | 1 De Marzo                | 0.73 | 0.73 | 0.74 | 521   | 484   | 408   |
| PRY | Paraguay | 23876 | Altos                     | 0.73 | 0.73 | 0.74 | 964   | 896   | 756   |
| PRY | Paraguay | 23877 | Arroyos Y Esteros         | 0.73 | 0.73 | 0.74 | 1743  | 1621  | 1367  |
| PRY | Paraguay | 23878 | Atyra                     | 0.73 | 0.73 | 0.74 | 1177  | 1095  | 923   |
| PRY | Paraguay | 23879 | Caacupe                   | 0.73 | 0.73 | 0.74 | 3281  | 3052  | 2574  |
| PRY | Paraguay | 23880 | Caragutatay               | 0.73 | 0.73 | 0.74 | 1079  | 1003  | 846   |
| PRY | Paraguay | 23881 | Emboscada                 | 0.73 | 0.73 | 0.74 | 1596  | 1485  | 1252  |
| PRY | Paraguay | 23882 | Eusebio Ayala             | 0.73 | 0.73 | 0.74 | 1591  | 1480  | 1248  |
| PRY | Paraguay | 23883 | Isla Pucu                 | 0.73 | 0.73 | 0.74 | 593   | 552   | 465   |
| PRY | Paraguay | 23884 | Itacurubi De La Cordiller | 0.73 | 0.73 | 0.74 | 742   | 690   | 582   |
| PRY | Paraguay | 23885 | Juan De Mena              | 0.73 | 0.73 | 0.74 | 513   | 477   | 402   |
| PRY | Paraguay | 23886 | Loma Grande               | 0.73 | 0.73 | 0.74 | 256   | 238   | 201   |
| PRY | Paraguay | 23887 | Mbacayaty Del Yhaguy      | 0.73 | 0.73 | 0.74 | 399   | 372   | 313   |
| PRY | Paraguay | 23888 | Nueva Colombia            | 0.73 | 0.73 | 0.74 | 339   | 316   | 266   |
| PRY | Paraguay | 23889 | Piribebuy                 | 0.73 | 0.73 | 0.74 | 1660  | 1544  | 1302  |
| PRY | Paraguay | 23890 | San Bernardino            | 0.73 | 0.73 | 0.74 | 1071  | 996   | 840   |
| PRY | Paraguay | 23891 | San Jose Obrero           | 0.73 | 0.73 | 0.74 | 398   | 370   | 312   |
| PRY | Paraguay | 23892 | Santa Elena               | 0.73 | 0.73 | 0.74 | 523   | 486   | 410   |



|     |          |       |                       |      |      |      |      |      |      |
|-----|----------|-------|-----------------------|------|------|------|------|------|------|
| PRY | Paraguay | 23893 | Tobati                | 0.73 | 0.73 | 0.74 | 2013 | 1873 | 1579 |
| PRY | Paraguay | 23894 | Valenzuela            | 0.73 | 0.73 | 0.74 | 514  | 478  | 403  |
| PRY | Paraguay | 23895 | Borja                 | 0.73 | 0.73 | 0.74 | 694  | 645  | 544  |
| PRY | Paraguay | 23896 | Capitan Troche        | 0.73 | 0.73 | 0.74 | 508  | 473  | 399  |
| PRY | Paraguay | 23897 | Cnel Martinez         | 0.73 | 0.73 | 0.74 | 176  | 164  | 138  |
| PRY | Paraguay | 23898 | Cnel. Martinez        | 0.73 | 0.73 | 0.74 | 302  | 281  | 237  |
| PRY | Paraguay | 23899 | Colonia Independencia | 0.73 | 0.73 | 0.74 | 3392 | 3156 | 2661 |
| PRY | Paraguay | 23900 | Dr. Bottrell          | 0.73 | 0.73 | 0.74 | 122  | 114  | 96   |
| PRY | Paraguay | 23901 | Gral Garay            | 0.73 | 0.73 | 0.74 | 552  | 513  | 433  |
| PRY | Paraguay | 23902 | Itape                 | 0.73 | 0.73 | 0.74 | 506  | 471  | 397  |
| PRY | Paraguay | 23903 | Iturbe                | 0.73 | 0.73 | 0.74 | 645  | 600  | 506  |
| PRY | Paraguay | 23904 | Jose Fassardi         | 0.73 | 0.73 | 0.74 | 1103 | 1026 | 865  |
| PRY | Paraguay | 23905 | Mbocayati             | 0.73 | 0.73 | 0.74 | 529  | 492  | 415  |
| PRY | Paraguay | 23906 | Natalicio Talavera    | 0.73 | 0.73 | 0.74 | 245  | 228  | 192  |
| PRY | Paraguay | 23907 | Numi                  | 0.73 | 0.73 | 0.74 | 257  | 239  | 201  |
| PRY | Paraguay | 23908 | San Salvador          | 0.73 | 0.73 | 0.74 | 260  | 242  | 204  |
| PRY | Paraguay | 23909 | Villarica             | 0.73 | 0.73 | 0.74 | 3631 | 3377 | 2848 |
| PRY | Paraguay | 23910 | Yataity               | 0.73 | 0.73 | 0.74 | 651  | 605  | 510  |
| PRY | Paraguay | 23911 | Alto Vera             | 0.73 | 0.73 | 0.74 | 1845 | 1716 | 1447 |
| PRY | Paraguay | 23912 | Bella Vista           | 0.73 | 0.73 | 0.74 | 782  | 727  | 613  |
| PRY | Paraguay | 23913 | Cambyreta             | 0.73 | 0.73 | 0.74 | 2056 | 1912 | 1613 |
| PRY | Paraguay | 23914 | Capitan Meza          | 0.73 | 0.73 | 0.74 | 1459 | 1357 | 1145 |
| PRY | Paraguay | 23915 | Capitan Miranda       | 0.73 | 0.73 | 0.74 | 841  | 783  | 660  |
| PRY | Paraguay | 23916 | Carlos A Lopez        | 0.73 | 0.73 | 0.74 | 1457 | 1356 | 1143 |
| PRY | Paraguay | 23917 | Carmen Del Parana     | 0.73 | 0.73 | 0.74 | 522  | 486  | 410  |
| PRY | Paraguay | 23918 | Coronel Bogado        | 0.73 | 0.73 | 0.74 | 1361 | 1266 | 1067 |
| PRY | Paraguay | 23919 | Edelira               | 0.73 | 0.73 | 0.74 | 2089 | 1943 | 1639 |
| PRY | Paraguay | 23920 | Encarnacion           | 0.73 | 0.73 | 0.74 | 7274 | 6767 | 5707 |
| PRY | Paraguay | 23921 | Fram                  | 0.73 | 0.73 | 0.74 | 662  | 616  | 519  |
| PRY | Paraguay | 23922 | Gral Artigas          | 0.73 | 0.73 | 0.74 | 1048 | 974  | 822  |
| PRY | Paraguay | 23923 | Gral. Delgado         | 0.73 | 0.73 | 0.74 | 594  | 552  | 466  |
| PRY | Paraguay | 23924 | Hohenau               | 0.73 | 0.73 | 0.74 | 799  | 743  | 627  |
| PRY | Paraguay | 23925 | Isla                  | 0.73 | 0.73 | 0.74 | 4    | 3    | 3    |

|     |          |       |                       |      |      |      |      |      |      |
|-----|----------|-------|-----------------------|------|------|------|------|------|------|
| PRY | Paraguay | 23926 | Isla Yacyreta         | 0.73 | 0.73 | 0.74 | 239  | 222  | 187  |
| PRY | Paraguay | 23927 | Jesus                 | 0.73 | 0.73 | 0.74 | 479  | 446  | 376  |
| PRY | Paraguay | 23928 | La Paz                | 0.73 | 0.73 | 0.74 | 280  | 261  | 220  |
| PRY | Paraguay | 23929 | Leandro Oviedo        | 0.73 | 0.73 | 0.74 | 367  | 342  | 288  |
| PRY | Paraguay | 23930 | Mayor Otano           | 0.73 | 0.73 | 0.74 | 986  | 917  | 773  |
| PRY | Paraguay | 23931 | Natalio               | 0.73 | 0.73 | 0.74 | 1420 | 1321 | 1114 |
| PRY | Paraguay | 23932 | Nueva Alborada        | 0.73 | 0.73 | 0.74 | 636  | 592  | 499  |
| PRY | Paraguay | 23933 | Obligado              | 0.73 | 0.73 | 0.74 | 963  | 895  | 755  |
| PRY | Paraguay | 23934 | Pirapo                | 0.73 | 0.73 | 0.74 | 513  | 477  | 402  |
| PRY | Paraguay | 23935 | San Cosme Y Damian    | 0.73 | 0.73 | 0.74 | 578  | 538  | 453  |
| PRY | Paraguay | 23936 | San Juan              | 0.73 | 0.73 | 0.74 | 488  | 454  | 383  |
| PRY | Paraguay | 23937 | San Pedro Del Parana  | 0.73 | 0.73 | 0.74 | 2631 | 2447 | 2064 |
| PRY | Paraguay | 23938 | San Rafael Del Parana | 0.73 | 0.73 | 0.74 | 1826 | 1698 | 1432 |
| PRY | Paraguay | 23939 | Tomas Romero P.       | 0.73 | 0.73 | 0.74 | 2478 | 2305 | 1944 |
| PRY | Paraguay | 23940 | Trinidad              | 0.73 | 0.73 | 0.74 | 542  | 504  | 425  |
| PRY | Paraguay | 23941 | Yatytyay              | 0.73 | 0.73 | 0.74 | 1310 | 1218 | 1028 |
| PRY | Paraguay | 23942 | Ayolas                | 0.73 | 0.73 | 0.74 | 787  | 732  | 617  |
| PRY | Paraguay | 23944 | San Ignacio           | 0.73 | 0.73 | 0.74 | 1899 | 1766 | 1489 |
| PRY | Paraguay | 23945 | San Juan Bautista     | 0.73 | 0.73 | 0.74 | 1324 | 1231 | 1038 |
| PRY | Paraguay | 23946 | San Miguel            | 0.73 | 0.73 | 0.74 | 454  | 422  | 356  |
| PRY | Paraguay | 23947 | San Patricio          | 0.73 | 0.73 | 0.74 | 267  | 249  | 210  |
| PRY | Paraguay | 23948 | Santa Maria           | 0.73 | 0.73 | 0.74 | 613  | 570  | 481  |
| PRY | Paraguay | 23949 | Santa Rosa            | 0.73 | 0.73 | 0.74 | 1482 | 1379 | 1163 |
| PRY | Paraguay | 23950 | Santiago              | 0.73 | 0.73 | 0.74 | 579  | 539  | 454  |
| PRY | Paraguay | 23951 | Villa Florida         | 0.73 | 0.73 | 0.74 | 187  | 174  | 147  |
| PRY | Paraguay | 23952 | Yabebyry              | 0.73 | 0.73 | 0.74 | 260  | 242  | 204  |
| PRY | Paraguay | 23953 | Alberdi               | 0.73 | 0.73 | 0.74 | 489  | 455  | 383  |
| PRY | Paraguay | 23954 | Cerrito               | 0.73 | 0.73 | 0.74 | 317  | 295  | 249  |
| PRY | Paraguay | 23955 | Desmochados           | 0.73 | 0.73 | 0.74 | 141  | 131  | 111  |
| PRY | Paraguay | 23956 | Gral. Jose E. Diaz    | 0.73 | 0.73 | 0.74 | 281  | 261  | 220  |
| PRY | Paraguay | 23957 | Guazucua              | 0.73 | 0.73 | 0.74 | 270  | 251  | 212  |
| PRY | Paraguay | 23958 | Humaita               | 0.73 | 0.73 | 0.74 | 229  | 213  | 180  |
| PRY | Paraguay | 23959 | Isla Umbu             | 0.73 | 0.73 | 0.74 | 252  | 235  | 198  |

|     |          |       |                           |      |      |      |      |      |      |
|-----|----------|-------|---------------------------|------|------|------|------|------|------|
| PRY | Paraguay | 23960 | Laureles                  | 0.73 | 0.73 | 0.74 | 268  | 249  | 210  |
| PRY | Paraguay | 23961 | Mayor Martinez            | 0.73 | 0.73 | 0.74 | 287  | 267  | 225  |
| PRY | Paraguay | 23962 | Paso De Patria            | 0.73 | 0.73 | 0.74 | 125  | 116  | 98   |
| PRY | Paraguay | 23963 | Pilar                     | 0.73 | 0.73 | 0.74 | 1839 | 1710 | 1442 |
| PRY | Paraguay | 23964 | San Juan Bta. Del Neembuc | 0.73 | 0.73 | 0.74 | 431  | 401  | 338  |
| PRY | Paraguay | 23965 | Tacuaras                  | 0.73 | 0.73 | 0.74 | 261  | 243  | 205  |
| PRY | Paraguay | 23966 | Villa Franca              | 0.73 | 0.73 | 0.74 | 92   | 86   | 73   |
| PRY | Paraguay | 23967 | Villa Oliva               | 0.73 | 0.73 | 0.74 | 324  | 302  | 254  |
| PRY | Paraguay | 23968 | Villalvin                 | 0.73 | 0.73 | 0.74 | 173  | 161  | 135  |
| PRY | Paraguay | 23969 | Acahay                    | 0.73 | 0.73 | 0.74 | 1091 | 1015 | 856  |
| PRY | Paraguay | 23970 | Caapucu                   | 0.73 | 0.73 | 0.74 | 557  | 518  | 437  |
| PRY | Paraguay | 23971 | Caballero                 | 0.73 | 0.73 | 0.74 | 488  | 454  | 383  |
| PRY | Paraguay | 23972 | Carapegua                 | 0.73 | 0.73 | 0.74 | 2240 | 2084 | 1757 |
| PRY | Paraguay | 23973 | Escobar                   | 0.73 | 0.73 | 0.74 | 631  | 587  | 495  |
| PRY | Paraguay | 23974 | La Colmena                | 0.73 | 0.73 | 0.74 | 367  | 341  | 288  |
| PRY | Paraguay | 23975 | Mbuyapey                  | 0.73 | 0.73 | 0.74 | 961  | 894  | 754  |
| PRY | Paraguay | 23976 | Paraguari                 | 0.73 | 0.73 | 0.74 | 1590 | 1479 | 1247 |
| PRY | Paraguay | 23977 | Pirayu                    | 0.73 | 0.73 | 0.74 | 1133 | 1054 | 889  |
| PRY | Paraguay | 23978 | Quiindy                   | 0.73 | 0.73 | 0.74 | 1321 | 1229 | 1037 |
| PRY | Paraguay | 23979 | Quyquyho                  | 0.73 | 0.73 | 0.74 | 518  | 482  | 407  |
| PRY | Paraguay | 23980 | San Roque Gonzalez        | 0.73 | 0.73 | 0.74 | 786  | 731  | 616  |
| PRY | Paraguay | 23981 | Sapucaí                   | 0.73 | 0.73 | 0.74 | 456  | 424  | 357  |
| PRY | Paraguay | 23982 | Tebicuarymi               | 0.73 | 0.73 | 0.74 | 287  | 267  | 225  |
| PRY | Paraguay | 23983 | Yaguaron                  | 0.73 | 0.73 | 0.74 | 1895 | 1763 | 1487 |
| PRY | Paraguay | 23984 | Ybycui                    | 0.73 | 0.73 | 0.74 | 1579 | 1469 | 1239 |
| PRY | Paraguay | 23985 | Ybytymi                   | 0.73 | 0.73 | 0.74 | 535  | 498  | 420  |
| PRY | Paraguay | 23986 | Benjamin Aceval           | 0.73 | 0.73 | 0.74 | 1413 | 1315 | 1109 |
| PRY | Paraguay | 23987 | Pozo Colorado             | 0.73 | 0.73 | 0.74 | 2640 | 2456 | 2071 |
| PRY | Paraguay | 23988 | Puerto Pinasco            | 0.73 | 0.73 | 0.74 | 390  | 363  | 306  |
| PRY | Paraguay | 23989 | Villa Hayes               | 0.73 | 0.73 | 0.74 | 4688 | 4361 | 3678 |
| PRY | Paraguay | 23990 | 25 De Diciembre           | 0.73 | 0.73 | 0.74 | 740  | 688  | 580  |
| PRY | Paraguay | 23991 | Antequera                 | 0.73 | 0.73 | 0.74 | 263  | 245  | 207  |
| PRY | Paraguay | 23992 | Chore                     | 0.73 | 0.73 | 0.74 | 2964 | 2757 | 2325 |

|     |          |       |                       |      |      |      |        |        |        |
|-----|----------|-------|-----------------------|------|------|------|--------|--------|--------|
| PRY | Paraguay | 23993 | Elizardo Aquino       | 0.73 | 0.73 | 0.74 | 1755   | 1633   | 1377   |
| PRY | Paraguay | 23994 | Isidoro Resquin       | 0.73 | 0.73 | 0.74 | 1725   | 1605   | 1353   |
| PRY | Paraguay | 23995 | Itacurubi Del Rosario | 0.73 | 0.73 | 0.74 | 933    | 868    | 732    |
| PRY | Paraguay | 23996 | Lima                  | 0.73 | 0.73 | 0.74 | 791    | 736    | 621    |
| PRY | Paraguay | 23997 | Nueva Germania        | 0.73 | 0.73 | 0.74 | 1807   | 1681   | 1417   |
| PRY | Paraguay | 23998 | S.pedro De Ycuamandyu | 0.73 | 0.73 | 0.74 | 2344   | 2180   | 1839   |
| PRY | Paraguay | 23999 | San Estanislao        | 0.73 | 0.73 | 0.74 | 8099   | 7534   | 6354   |
| PRY | Paraguay | 24000 | San Pablo             | 0.73 | 0.73 | 0.74 | 321    | 299    | 252    |
| PRY | Paraguay | 24001 | Tacuati               | 0.73 | 0.73 | 0.74 | 743    | 691    | 583    |
| PRY | Paraguay | 24002 | Union                 | 0.73 | 0.73 | 0.74 | 470    | 437    | 368    |
| PRY | Paraguay | 24003 | Villa Del Rosario     | 0.73 | 0.73 | 0.74 | 985    | 916    | 773    |
| PRY | Paraguay | 24004 | Yataity Del Norte     | 0.73 | 0.73 | 0.74 | 1015   | 944    | 796    |
| RWA | Rwanda   | 21974 | Bugesera              | 0.00 | 0.00 | 0.00 | 349222 | 349222 | 349222 |
| RWA | Rwanda   | 21975 | Burera                | 0.00 | 0.00 | 0.00 | 317177 | 317177 | 317177 |
| RWA | Rwanda   | 21976 | Gakenke               | 0.00 | 0.00 | 0.00 | 326227 | 326227 | 326227 |
| RWA | Rwanda   | 21977 | Gasabo                | 0.00 | 0.00 | 0.00 | 551806 | 551806 | 551806 |
| RWA | Rwanda   | 21978 | Gatsibo               | 0.00 | 0.00 | 0.00 | 418800 | 418800 | 418800 |
| RWA | Rwanda   | 21979 | Gicumbi               | 0.00 | 0.00 | 0.00 | 390287 | 390287 | 390287 |
| RWA | Rwanda   | 21980 | Gisagara              | 0.00 | 0.00 | 0.00 | 311422 | 311422 | 311422 |
| RWA | Rwanda   | 21981 | Huye                  | 0.00 | 0.00 | 0.00 | 318639 | 318639 | 318639 |
| RWA | Rwanda   | 21982 | Kamonyi               | 0.00 | 0.00 | 0.00 | 338630 | 338630 | 338630 |
| RWA | Rwanda   | 21983 | Karongi               | 0.00 | 0.00 | 0.00 | 317035 | 317035 | 317035 |
| RWA | Rwanda   | 21984 | Kayonza               | 0.00 | 0.00 | 0.00 | 336016 | 336016 | 336016 |
| RWA | Rwanda   | 21985 | Kicukiro              | 0.00 | 0.00 | 0.00 | 314866 | 314866 | 314866 |
| RWA | Rwanda   | 21986 | Kirehe                | 0.00 | 0.00 | 0.00 | 324479 | 324479 | 324479 |
| RWA | Rwanda   | 21987 | Muhanga               | 0.00 | 0.00 | 0.00 | 304288 | 304288 | 304288 |
| RWA | Rwanda   | 21988 | Musanze               | 0.00 | 0.00 | 0.00 | 361496 | 361496 | 361496 |
| RWA | Rwanda   | 21989 | Ngoma                 | 0.00 | 0.00 | 0.00 | 329456 | 329456 | 329456 |
| RWA | Rwanda   | 21990 | Ngororero             | 0.00 | 0.00 | 0.00 | 315944 | 315944 | 315944 |
| RWA | Rwanda   | 21991 | Nyabihu               | 0.00 | 0.00 | 0.00 | 284048 | 284048 | 284048 |
| RWA | Rwanda   | 21992 | Nyagatare             | 0.00 | 0.00 | 0.00 | 442698 | 442698 | 442698 |
| RWA | Rwanda   | 21993 | Nyamagabe             | 0.00 | 0.00 | 0.00 | 326436 | 326436 | 326436 |
| RWA | Rwanda   | 21994 | Nyamasheke            | 0.00 | 0.00 | 0.00 | 369967 | 369967 | 369967 |

|     |        |       |                          |      |      |      |         |         |         |
|-----|--------|-------|--------------------------|------|------|------|---------|---------|---------|
| RWA | Rwanda | 21995 | Nyanza                   | 0.00 | 0.00 | 0.00 | 311180  | 311180  | 311180  |
| RWA | Rwanda | 21996 | Nyarugenge               | 0.00 | 0.00 | 0.00 | 268621  | 268621  | 268621  |
| RWA | Rwanda | 21997 | Nyaruguru                | 0.00 | 0.00 | 0.00 | 279312  | 279312  | 279312  |
| RWA | Rwanda | 21998 | Rubavu                   | 0.00 | 0.00 | 0.00 | 396133  | 396133  | 396133  |
| RWA | Rwanda | 21999 | Ruhango                  | 0.00 | 0.00 | 0.00 | 311425  | 311425  | 311425  |
| RWA | Rwanda | 22000 | Rulindo                  | 0.00 | 0.00 | 0.00 | 277736  | 277736  | 277736  |
| RWA | Rwanda | 22001 | Rusizi                   | 0.00 | 0.00 | 0.00 | 392096  | 392096  | 392096  |
| RWA | Rwanda | 22002 | Rutsiro                  | 0.00 | 0.00 | 0.00 | 310939  | 310939  | 310939  |
| RWA | Rwanda | 22003 | Rwamagana                | 0.00 | 0.00 | 0.00 | 302298  | 302298  | 302298  |
| SDN | Sudan  | 125   | Admin unit not available | 0.07 | 0.07 | 0.07 | 56617   | 56617   | 56617   |
| SDN | Sudan  | 4151  | Abyei                    | 0.41 | 0.44 | 0.47 | 134532  | 125304  | 112808  |
| SDN | Sudan  | 37026 | Al Hasaheisa             | 0.07 | 0.07 | 0.07 | 373633  | 373633  | 373633  |
| SDN | Sudan  | 37027 | Al Kamlin                | 0.00 | 0.00 | 0.00 | 317074  | 317074  | 317074  |
| SDN | Sudan  | 37028 | Al Managil               | 0.07 | 0.07 | 0.07 | 474106  | 474106  | 474106  |
| SDN | Sudan  | 37029 | East Al Jazeera          | 0.07 | 0.07 | 0.07 | 503025  | 503025  | 503025  |
| SDN | Sudan  | 37030 | North Al Jazeera         | 0.07 | 0.07 | 0.07 | 321621  | 321621  | 321621  |
| SDN | Sudan  | 37031 | South Al Jazeera         | 0.07 | 0.07 | 0.07 | 311343  | 311343  | 311343  |
| SDN | Sudan  | 37032 | Um Al Gura               | 0.07 | 0.07 | 0.07 | 354774  | 354774  | 354774  |
| SDN | Sudan  | 37037 | Ad Damazin               | 0.07 | 0.07 | 0.07 | 172199  | 172199  | 172199  |
| SDN | Sudan  | 37038 | Al Kurumuk               | 0.07 | 0.07 | 0.07 | 120132  | 120132  | 120132  |
| SDN | Sudan  | 37039 | Al Roseires              | 0.07 | 0.07 | 0.07 | 172626  | 172626  | 172626  |
| SDN | Sudan  | 37040 | Baw                      | 0.07 | 0.07 | 0.07 | 117503  | 117503  | 117503  |
| SDN | Sudan  | 37041 | Geissan                  | 0.07 | 0.07 | 0.07 | 115276  | 115276  | 115276  |
| SDN | Sudan  | 37046 | Al Faw                   | 0.92 | 0.92 | 0.96 | 0       | 0       | 0       |
| SDN | Sudan  | 37048 | Al Gadaref               | 0.92 | 0.92 | 0.96 | 0       | 0       | 0       |
| SDN | Sudan  | 37049 | Al Galabat               | 0.92 | 0.92 | 0.96 | 0       | 0       | 0       |
| SDN | Sudan  | 37050 | Al Rahd                  | 0.92 | 0.92 | 0.96 | 0       | 0       | 0       |
| SDN | Sudan  | 37058 | Al Gash                  | 0.95 | 0.95 | 0.97 | 0       | 0       | 0       |
| SDN | Sudan  | 37059 | Hamashkorieb             | 0.95 | 0.95 | 0.97 | 0       | 0       | 0       |
| SDN | Sudan  | 37060 | Kassala                  | 0.95 | 0.95 | 0.97 | 0       | 0       | 0       |
| SDN | Sudan  | 37061 | Nahr Atbara              | 0.95 | 0.95 | 0.97 | 0       | 0       | 0       |
| SDN | Sudan  | 37062 | Butana                   | 0.95 | 0.95 | 0.97 | 0       | 0       | 0       |
| SDN | Sudan  | 37063 | Jabal Aulia              | 0.00 | 0.00 | 0.00 | 1406292 | 1406292 | 1406292 |

|     |       |       |                  |      |      |      |         |         |         |
|-----|-------|-------|------------------|------|------|------|---------|---------|---------|
| SDN | Sudan | 37064 | Karary           | 0.00 | 0.00 | 0.00 | 1240811 | 1240811 | 1240811 |
| SDN | Sudan | 37065 | Khartoum         | 0.00 | 0.00 | 0.00 | 671856  | 671856  | 671856  |
| SDN | Sudan | 37066 | Khartoum Bahri   | 0.07 | 0.07 | 0.07 | 402157  | 402157  | 402157  |
| SDN | Sudan | 37067 | Sharg En Nile    | 0.07 | 0.07 | 0.07 | 328480  | 328480  | 328480  |
| SDN | Sudan | 37068 | Um Badda         | 0.00 | 0.00 | 0.00 | 642484  | 642484  | 642484  |
| SDN | Sudan | 37069 | Um Durman        | 0.00 | 0.00 | 0.00 | 440142  | 440142  | 440142  |
| SDN | Sudan | 37070 | Abu Hamad        | 0.00 | 0.00 | 0.00 | 264492  | 264492  | 264492  |
| SDN | Sudan | 37071 | Ad Damer         | 0.00 | 0.00 | 0.00 | 170458  | 170458  | 170458  |
| SDN | Sudan | 37072 | Al Matammah      | 0.00 | 0.00 | 0.00 | 255680  | 255680  | 255680  |
| SDN | Sudan | 37073 | Atbara           | 0.00 | 0.00 | 0.00 | 225835  | 225835  | 225835  |
| SDN | Sudan | 37074 | Barbar           | 0.00 | 0.00 | 0.00 | 49465   | 49465   | 49465   |
| SDN | Sudan | 37075 | Shendi           | 0.07 | 0.07 | 0.07 | 380721  | 380721  | 380721  |
| SDN | Sudan | 37080 | Al Fasher        | 0.40 | 0.44 | 0.47 | 389681  | 353989  | 323739  |
| SDN | Sudan | 37081 | Kabkabiya        | 0.40 | 0.44 | 0.47 | 125534  | 114036  | 104291  |
| SDN | Sudan | 37082 | Kutum            | 0.40 | 0.44 | 0.47 | 125160  | 113696  | 103980  |
| SDN | Sudan | 37083 | Mellit           | 0.40 | 0.44 | 0.47 | 252068  | 228981  | 209414  |
| SDN | Sudan | 37084 | Um Kadada        | 0.40 | 0.44 | 0.47 | 152065  | 138137  | 126333  |
| SDN | Sudan | 37085 | Bara             | 0.79 | 0.80 | 0.86 | 5769    | 0       | 0       |
| SDN | Sudan | 37086 | Jebrat Al Sheikh | 0.79 | 0.80 | 0.86 | 5006    | 0       | 0       |
| SDN | Sudan | 37087 | Sheikan          | 0.79 | 0.80 | 0.86 | 7645    | 0       | 0       |
| SDN | Sudan | 37088 | Sowdari          | 0.79 | 0.80 | 0.86 | 5676    | 0       | 0       |
| SDN | Sudan | 37089 | Um Rawaba        | 0.79 | 0.80 | 0.86 | 14649   | 0       | 0       |
| SDN | Sudan | 37090 | Addabah          | 0.00 | 0.00 | 0.00 | 183399  | 183399  | 183399  |
| SDN | Sudan | 37091 | Dongola          | 0.00 | 0.00 | 0.00 | 446347  | 446347  | 446347  |
| SDN | Sudan | 37092 | Merawi           | 0.00 | 0.00 | 0.00 | 110623  | 110623  | 110623  |
| SDN | Sudan | 37093 | Wadi Halfa       | 0.00 | 0.00 | 0.00 | 110140  | 110140  | 110140  |
| SDN | Sudan | 37095 | Port Sudan       | 0.93 | 0.93 | 0.93 | 0       | 0       | 0       |
| SDN | Sudan | 37096 | Sinkat           | 0.93 | 0.93 | 0.93 | 0       | 0       | 0       |
| SDN | Sudan | 37097 | Tokar            | 0.93 | 0.93 | 0.93 | 0       | 0       | 0       |
| SDN | Sudan | 37098 | Ad Dinder        | 0.07 | 0.07 | 0.07 | 383941  | 383941  | 383941  |
| SDN | Sudan | 37099 | Sennar           | 0.07 | 0.07 | 0.07 | 967360  | 967360  | 967360  |
| SDN | Sudan | 37100 | Singa            | 0.07 | 0.07 | 0.07 | 419050  | 419050  | 419050  |
| SDN | Sudan | 37101 | Adayala          | 0.40 | 0.44 | 0.47 | 54903   | 49874   | 45612   |

|     |         |       |                |      |      |      |        |        |        |
|-----|---------|-------|----------------|------|------|------|--------|--------|--------|
| SDN | Sudan   | 37102 | Al Deain       | 0.40 | 0.44 | 0.47 | 312694 | 284053 | 259780 |
| SDN | Sudan   | 37103 | Buram          | 0.40 | 0.44 | 0.47 | 205615 | 186782 | 170821 |
| SDN | Sudan   | 37104 | Edd al Fursan  | 0.40 | 0.44 | 0.47 | 101602 | 92296  | 84409  |
| SDN | Sudan   | 37105 | Kas            | 0.40 | 0.44 | 0.47 | 106731 | 96955  | 88670  |
| SDN | Sudan   | 37106 | Nyala          | 0.40 | 0.44 | 0.47 | 344087 | 312571 | 285861 |
| SDN | Sudan   | 37107 | Rehed Al Birdi | 0.40 | 0.44 | 0.47 | 97788  | 88831  | 81240  |
| SDN | Sudan   | 37108 | Shearia        | 0.40 | 0.44 | 0.47 | 191767 | 174202 | 159316 |
| SDN | Sudan   | 37109 | Tulus          | 0.40 | 0.44 | 0.47 | 11064  | 10050  | 9191   |
| SDN | Sudan   | 37110 | Abu Jubaiyah   | 0.41 | 0.44 | 0.47 | 110746 | 103150 | 92863  |
| SDN | Sudan   | 37111 | Delling        | 0.41 | 0.44 | 0.47 | 140939 | 131272 | 118180 |
| SDN | Sudan   | 37112 | Kadugli        | 0.41 | 0.44 | 0.47 | 332653 | 309837 | 278938 |
| SDN | Sudan   | 37113 | Rashad         | 0.41 | 0.44 | 0.47 | 97321  | 90646  | 81606  |
| SDN | Sudan   | 37114 | Talodi         | 0.41 | 0.44 | 0.47 | 98160  | 91427  | 82309  |
| SDN | Sudan   | 37134 | Al Geneina     | 0.40 | 0.44 | 0.47 | 244130 | 221770 | 202819 |
| SDN | Sudan   | 37135 | Habillah       | 0.40 | 0.44 | 0.47 | 95300  | 86572  | 79174  |
| SDN | Sudan   | 37136 | Jebel Marra    | 0.40 | 0.44 | 0.47 | 65283  | 59303  | 54236  |
| SDN | Sudan   | 37137 | Kulbus         | 0.40 | 0.44 | 0.47 | 195081 | 177213 | 162070 |
| SDN | Sudan   | 37138 | Mukjar         | 0.40 | 0.44 | 0.47 | 103754 | 94251  | 86197  |
| SDN | Sudan   | 37139 | Wadi Salih     | 0.40 | 0.44 | 0.47 | 91308  | 82945  | 75857  |
| SDN | Sudan   | 37140 | Zallingi       | 0.40 | 0.44 | 0.47 | 146784 | 133340 | 121945 |
| SDN | Sudan   | 37146 | As Salam       | 0.41 | 0.44 | 0.47 | 49391  | 46003  | 41415  |
| SDN | Sudan   | 37147 | En Nuhud       | 0.79 | 0.80 | 0.86 | 11050  | 0      | 0      |
| SDN | Sudan   | 37148 | Ghebeish       | 0.79 | 0.80 | 0.86 | 6033   | 0      | 0      |
| SDN | Sudan   | 37149 | Lagawa         | 0.41 | 0.44 | 0.47 | 135065 | 125801 | 113255 |
| SDN | Sudan   | 37150 | Ad Douiem      | 0.07 | 0.07 | 0.07 | 468717 | 468717 | 468717 |
| SDN | Sudan   | 37151 | Al Gutaina     | 0.07 | 0.07 | 0.07 | 826790 | 826790 | 826790 |
| SDN | Sudan   | 37152 | Al Jabalian    | 0.07 | 0.07 | 0.07 | 301310 | 301310 | 301310 |
| SDN | Sudan   | 37153 | Kosti          | 0.07 | 0.07 | 0.07 | 800531 | 800531 | 800531 |
| SDN | Sudan   | 40771 | Halayeb        | 0.93 | 0.93 | 0.93 | 0      | 0      | 0      |
| SDN | Sudan   | 68803 | Seteet         | 0.95 | 0.95 | 0.97 | 0      | 0      | 0      |
| SDN | Sudan   | 68804 | Al Fushqa      | 0.92 | 0.92 | 0.96 | 0      | 0      | 0      |
| SEN | Senegal | 1379  | Bakel          | 0.92 | 0.92 | 0.92 | 0      | 0      | 0      |
| SEN | Senegal | 1380  | Birkilane      | 0.61 | 0.75 | 0.86 | 16731  | 4165   | 0      |

|     |         |       |                   |      |      |      |        |        |   |
|-----|---------|-------|-------------------|------|------|------|--------|--------|---|
| SEN | Senegal | 1381  | Boukiling         | 0.61 | 0.75 | 0.86 | 26803  | 6672   | 0 |
| SEN | Senegal | 1382  | Dakar             | 0.51 | 0.69 | 0.81 | 917662 | 338772 | 0 |
| SEN | Senegal | 1383  | Gossas            | 0.61 | 0.75 | 0.86 | 23831  | 5932   | 0 |
| SEN | Senegal | 1384  | Goudiry           | 0.61 | 0.75 | 0.86 | 25403  | 6324   | 0 |
| SEN | Senegal | 1394  | Goudomp           | 0.61 | 0.75 | 0.86 | 38905  | 9685   | 0 |
| SEN | Senegal | 1395  | Guinguineo        | 0.80 | 0.90 | 0.94 | 0      | 0      | 0 |
| SEN | Senegal | 1396  | Kaffrine          | 0.61 | 0.75 | 0.86 | 47024  | 11706  | 0 |
| SEN | Senegal | 1397  | Kedougou          | 0.91 | 0.97 | 0.97 | 0      | 0      | 0 |
| SEN | Senegal | 1408  | Kolda             | 0.61 | 0.75 | 0.86 | 60297  | 15010  | 0 |
| SEN | Senegal | 1486  | Koungueul         | 0.61 | 0.75 | 0.86 | 32545  | 8101   | 0 |
| SEN | Senegal | 1488  | Koupentoum        | 0.61 | 0.75 | 0.86 | 35545  | 8848   | 0 |
| SEN | Senegal | 1497  | Maleme hodar      | 0.61 | 0.75 | 0.86 | 24016  | 5978   | 0 |
| SEN | Senegal | 1499  | Medina yoro foula | 0.61 | 0.75 | 0.86 | 23770  | 5917   | 0 |
| SEN | Senegal | 1510  | Salemata          | 0.91 | 0.95 | 0.97 | 0      | 0      | 0 |
| SEN | Senegal | 1538  | Saraya            | 0.91 | 0.97 | 0.97 | 0      | 0      | 0 |
| SEN | Senegal | 1609  | Sedhiou           | 0.61 | 0.75 | 0.86 | 38098  | 9484   | 0 |
| SEN | Senegal | 1649  | Tambacounda       | 0.61 | 0.75 | 0.86 | 37296  | 9284   | 0 |
| SEN | Senegal | 25321 | Rufisque          | 0.51 | 0.69 | 0.81 | 112659 | 41590  | 0 |
| SEN | Senegal | 25322 | Bambey            | 0.90 | 0.90 | 0.91 | 0      | 0      | 0 |
| SEN | Senegal | 25323 | Diourbel          | 0.51 | 0.69 | 0.81 | 86974  | 32108  | 0 |
| SEN | Senegal | 25325 | Fatick            | 0.61 | 0.75 | 0.86 | 66988  | 16675  | 0 |
| SEN | Senegal | 25326 | Foundiougne       | 0.82 | 0.91 | 0.94 | 0      | 0      | 0 |
| SEN | Senegal | 25329 | Kaolack           | 0.81 | 0.90 | 0.94 | 0      | 0      | 0 |
| SEN | Senegal | 25330 | Nioro du rip      | 0.61 | 0.75 | 0.86 | 71637  | 17833  | 0 |
| SEN | Senegal | 25333 | Velingara         | 0.61 | 0.75 | 0.86 | 56547  | 14076  | 0 |
| SEN | Senegal | 25334 | Kebemer           | 0.51 | 0.69 | 0.81 | 82754  | 30550  | 0 |
| SEN | Senegal | 25336 | Louga             | 0.80 | 0.89 | 0.94 | 641    | 0      | 0 |
| SEN | Senegal | 25343 | Mbour             | 0.83 | 0.90 | 0.94 | 0      | 0      | 0 |
| SEN | Senegal | 25344 | Thies             | 0.84 | 0.91 | 0.94 | 0      | 0      | 0 |
| SEN | Senegal | 25345 | Tivaoune          | 0.84 | 0.91 | 0.94 | 0      | 0      | 0 |
| SEN | Senegal | 25346 | Bignona           | 0.61 | 0.75 | 0.86 | 57984  | 14434  | 0 |
| SEN | Senegal | 25347 | Oussouye          | 0.61 | 0.75 | 0.86 | 8958   | 2230   | 0 |
| SEN | Senegal | 25348 | Ziguinchor        | 0.61 | 0.75 | 0.86 | 51389  | 12792  | 0 |



|     |              |       |               |      |      |      |        |        |        |
|-----|--------------|-------|---------------|------|------|------|--------|--------|--------|
| SEN | Senegal      | 47590 | Dagana        | 0.80 | 0.89 | 0.94 | 1027   | 0      | 0      |
| SEN | Senegal      | 47593 | Kanel         | 0.51 | 0.69 | 0.81 | 84044  | 31026  | 0      |
| SEN | Senegal      | 47594 | Linguere      | 0.80 | 0.89 | 0.94 | 0      | 0      | 0      |
| SEN | Senegal      | 47595 | Matam         | 0.51 | 0.69 | 0.81 | 97071  | 35836  | 0      |
| SEN | Senegal      | 47596 | Mbacke        | 0.90 | 0.90 | 0.91 | 0      | 0      | 0      |
| SEN | Senegal      | 47598 | Podor         | 0.81 | 0.89 | 0.94 | 0      | 0      | 0      |
| SEN | Senegal      | 47599 | Ranerou       | 0.51 | 0.69 | 0.81 | 23836  | 8799   | 0      |
| SEN | Senegal      | 47600 | Saint louis   | 0.82 | 0.90 | 0.94 | 0      | 0      | 0      |
| SLE | Sierra Leone | 25406 | Kailahun      | 0.30 | 0.30 | 0.30 | 235247 | 235247 | 235247 |
| SLE | Sierra Leone | 25407 | Kenema        | 0.75 | 0.75 | 0.75 | 32263  | 32263  | 32263  |
| SLE | Sierra Leone | 25408 | Kono          | 0.30 | 0.30 | 0.30 | 251458 | 251458 | 251458 |
| SLE | Sierra Leone | 25409 | Bombali       | 0.30 | 0.30 | 0.30 | 251116 | 251116 | 251116 |
| SLE | Sierra Leone | 25410 | Kambia        | 0.30 | 0.30 | 0.30 | 159711 | 159711 | 159711 |
| SLE | Sierra Leone | 25411 | Koinadugu     | 0.30 | 0.30 | 0.30 | 170102 | 170102 | 170102 |
| SLE | Sierra Leone | 25412 | Port Loko     | 0.30 | 0.30 | 0.30 | 285514 | 285514 | 285514 |
| SLE | Sierra Leone | 25413 | Tonkolili     | 0.66 | 0.67 | 0.68 | 57424  | 53148  | 50168  |
| SLE | Sierra Leone | 25414 | Bo            | 0.71 | 0.74 | 0.76 | 54346  | 33976  | 21025  |
| SLE | Sierra Leone | 25415 | Bonthe        | 0.30 | 0.30 | 0.30 | 82183  | 82183  | 82183  |
| SLE | Sierra Leone | 25416 | Moyamba       | 0.30 | 0.30 | 0.30 | 178790 | 178790 | 178790 |
| SLE | Sierra Leone | 25417 | Pujehun       | 0.30 | 0.30 | 0.30 | 154479 | 154479 | 154479 |
| SLE | Sierra Leone | 25418 | Western Area  | 0.30 | 0.30 | 0.30 | 606261 | 606261 | 606261 |
| SOM | Somalia      | 25657 | Ceel Barde    | 0.00 | 0.00 | 0.00 | 34312  | 34312  | 34312  |
| SOM | Somalia      | 25658 | Rab Dhuure    | 0.00 | 0.00 | 0.00 | 43933  | 43933  | 43933  |
| SOM | Somalia      | 25659 | Tayeeglow     | 0.00 | 0.00 | 0.00 | 94375  | 94375  | 94375  |
| SOM | Somalia      | 25660 | Waajid        | 0.00 | 0.00 | 0.00 | 81641  | 81641  | 81641  |
| SOM | Somalia      | 25661 | Xudur         | 0.00 | 0.00 | 0.00 | 108565 | 108565 | 108565 |
| SOM | Somalia      | 25668 | Baydhaba      | 0.00 | 0.00 | 0.00 | 398905 | 398905 | 398905 |
| SOM | Somalia      | 25669 | Buur Hakaba   | 0.00 | 0.00 | 0.00 | 146670 | 146670 | 146670 |
| SOM | Somalia      | 25670 | Diinsoor      | 0.00 | 0.00 | 0.00 | 88503  | 88503  | 88503  |
| SOM | Somalia      | 25671 | Qansax Dheere | 0.00 | 0.00 | 0.00 | 115127 | 115127 | 115127 |
| SOM | Somalia      | 25673 | Cabudwaaq     | 0.00 | 0.00 | 0.00 | 47513  | 47513  | 47513  |
| SOM | Somalia      | 25674 | Cadaado       | 0.00 | 0.00 | 0.00 | 53673  | 53673  | 53673  |
| SOM | Somalia      | 25675 | Ceel Buur     | 0.00 | 0.00 | 0.00 | 92164  | 92164  | 92164  |

|     |             |       |               |      |      |      |        |        |        |
|-----|-------------|-------|---------------|------|------|------|--------|--------|--------|
| SOM | Somalia     | 25676 | Ceel Dheer    | 0.00 | 0.00 | 0.00 | 85174  | 85174  | 85174  |
| SOM | Somalia     | 25677 | Dhuusamarreeb | 0.00 | 0.00 | 0.00 | 106871 | 106871 | 106871 |
| SOM | Somalia     | 25678 | Baardheere    | 0.00 | 0.00 | 0.00 | 123727 | 123727 | 123727 |
| SOM | Somalia     | 25679 | Belet Xaawo   | 0.00 | 0.00 | 0.00 | 60757  | 60757  | 60757  |
| SOM | Somalia     | 25680 | Ceel Waaq     | 0.00 | 0.00 | 0.00 | 23243  | 23243  | 23243  |
| SOM | Somalia     | 25681 | Doolow        | 0.00 | 0.00 | 0.00 | 27498  | 27498  | 27498  |
| SOM | Somalia     | 25682 | Garbahaarey   | 0.00 | 0.00 | 0.00 | 66824  | 66824  | 66824  |
| SOM | Somalia     | 25683 | Luuq          | 0.00 | 0.00 | 0.00 | 73148  | 73148  | 73148  |
| SOM | Somalia     | 25684 | Belet Weyne   | 0.00 | 0.00 | 0.00 | 201178 | 201178 | 201178 |
| SOM | Somalia     | 25685 | Bulo Burto    | 0.00 | 0.00 | 0.00 | 129887 | 129887 | 129887 |
| SOM | Somalia     | 25686 | Jalalaqsi     | 0.00 | 0.00 | 0.00 | 54993  | 54993  | 54993  |
| SOM | Somalia     | 25687 | Afmadow       | 0.00 | 0.00 | 0.00 | 60669  | 60669  | 60669  |
| SOM | Somalia     | 25688 | Badhaadhe     | 0.00 | 0.00 | 0.00 | 45941  | 45941  | 45941  |
| SOM | Somalia     | 25689 | Jamaame       | 0.00 | 0.00 | 0.00 | 161270 | 161270 | 161270 |
| SOM | Somalia     | 25690 | Kismaayo      | 0.00 | 0.00 | 0.00 | 194888 | 194888 | 194888 |
| SOM | Somalia     | 25691 | Afgooye       | 0.00 | 0.00 | 0.00 | 303398 | 303398 | 303398 |
| SOM | Somalia     | 25692 | Baraawe       | 0.00 | 0.00 | 0.00 | 66617  | 66617  | 66617  |
| SOM | Somalia     | 25693 | Kurtunwaarey  | 0.00 | 0.00 | 0.00 | 64657  | 64657  | 64657  |
| SOM | Somalia     | 25694 | Marka         | 0.00 | 0.00 | 0.00 | 221467 | 221467 | 221467 |
| SOM | Somalia     | 25695 | Qoryooley     | 0.00 | 0.00 | 0.00 | 159869 | 159869 | 159869 |
| SOM | Somalia     | 25696 | Sablaale      | 0.00 | 0.00 | 0.00 | 50349  | 50349  | 50349  |
| SOM | Somalia     | 25697 | Wanla Weyn    | 0.00 | 0.00 | 0.00 | 181806 | 181806 | 181806 |
| SOM | Somalia     | 25698 | Bu'aale       | 0.00 | 0.00 | 0.00 | 69658  | 69658  | 69658  |
| SOM | Somalia     | 25699 | Jilib         | 0.00 | 0.00 | 0.00 | 132792 | 132792 | 132792 |
| SOM | Somalia     | 25700 | Saakow        | 0.00 | 0.00 | 0.00 | 77192  | 77192  | 77192  |
| SOM | Somalia     | 25701 | Adan Yabaal   | 0.00 | 0.00 | 0.00 | 73232  | 73232  | 73232  |
| SOM | Somalia     | 25702 | Balcad        | 0.00 | 0.00 | 0.00 | 158328 | 158328 | 158328 |
| SOM | Somalia     | 25703 | Cadale        | 0.00 | 0.00 | 0.00 | 53499  | 53499  | 53499  |
| SOM | Somalia     | 25704 | Jowhar        | 0.00 | 0.00 | 0.00 | 327854 | 327854 | 327854 |
| SSD | South Sudan | 37022 | Aliab         | 0.00 | 0.00 | 0.00 | 59120  | 59120  | 59120  |
| SSD | South Sudan | 37023 | Rumbek        | 0.00 | 0.00 | 0.00 | 435080 | 435080 | 435080 |
| SSD | South Sudan | 37024 | Shobet        | 0.00 | 0.00 | 0.00 | 152982 | 152982 | 152982 |
| SSD | South Sudan | 37025 | Yerol         | 0.00 | 0.00 | 0.00 | 196555 | 196555 | 196555 |

|     |             |       |               |      |      |      |        |        |        |
|-----|-------------|-------|---------------|------|------|------|--------|--------|--------|
| SSD | South Sudan | 37033 | Bahr Al Jabal | 0.00 | 0.00 | 0.00 | 431168 | 431168 | 431168 |
| SSD | South Sudan | 37034 | Kajo Kaji     | 0.00 | 0.00 | 0.00 | 201984 | 201984 | 201984 |
| SSD | South Sudan | 37035 | Nahr Yei      | 0.00 | 0.00 | 0.00 | 520006 | 520006 | 520006 |
| SSD | South Sudan | 37036 | Terkaka       | 0.00 | 0.00 | 0.00 | 176914 | 176914 | 176914 |
| SSD | South Sudan | 37042 | Amatonge      | 0.00 | 0.00 | 0.00 | 272740 | 272740 | 272740 |
| SSD | South Sudan | 37043 | Kapoeta       | 0.00 | 0.00 | 0.00 | 347829 | 347829 | 347829 |
| SSD | South Sudan | 37044 | Magwi         | 0.00 | 0.00 | 0.00 | 208616 | 208616 | 208616 |
| SSD | South Sudan | 37045 | Shokodom      | 0.00 | 0.00 | 0.00 | 183593 | 183593 | 183593 |
| SSD | South Sudan | 37051 | Akobo         | 0.00 | 0.00 | 0.00 | 223966 | 223966 | 223966 |
| SSD | South Sudan | 37052 | Ayod          | 0.00 | 0.00 | 0.00 | 275196 | 275196 | 275196 |
| SSD | South Sudan | 37053 | Bor           | 0.00 | 0.00 | 0.00 | 178478 | 178478 | 178478 |
| SSD | South Sudan | 37054 | Fam Al Zaraf  | 0.00 | 0.00 | 0.00 | 149874 | 149874 | 149874 |
| SSD | South Sudan | 37055 | Nahr Atiem    | 0.00 | 0.00 | 0.00 | 264581 | 264581 | 264581 |
| SSD | South Sudan | 37056 | Pibor         | 0.00 | 0.00 | 0.00 | 302750 | 302750 | 302750 |
| SSD | South Sudan | 37057 | Wat           | 0.00 | 0.00 | 0.00 | 235553 | 235553 | 235553 |
| SSD | South Sudan | 37076 | Aryat         | 0.00 | 0.00 | 0.00 | 59195  | 59195  | 59195  |
| SSD | South Sudan | 37077 | Aweil         | 0.00 | 0.00 | 0.00 | 401363 | 401363 | 401363 |
| SSD | South Sudan | 37078 | Malek         | 0.00 | 0.00 | 0.00 | 98109  | 98109  | 98109  |
| SSD | South Sudan | 37079 | Wanjuk        | 0.00 | 0.00 | 0.00 | 308621 | 308621 | 308621 |
| SSD | South Sudan | 37115 | Al Leiri      | 0.00 | 0.00 | 0.00 | 258967 | 258967 | 258967 |
| SSD | South Sudan | 37116 | Al Mayom      | 0.00 | 0.00 | 0.00 | 140536 | 140536 | 140536 |
| SSD | South Sudan | 37117 | Faring        | 0.00 | 0.00 | 0.00 | 43360  | 43360  | 43360  |
| SSD | South Sudan | 37118 | Rabkona       | 0.00 | 0.00 | 0.00 | 271242 | 271242 | 271242 |
| SSD | South Sudan | 37119 | Al Mabien     | 0.00 | 0.00 | 0.00 | 39939  | 39939  | 39939  |
| SSD | South Sudan | 37120 | Al Renk       | 0.00 | 0.00 | 0.00 | 168625 | 168625 | 168625 |
| SSD | South Sudan | 37121 | Baleit        | 0.00 | 0.00 | 0.00 | 83436  | 83436  | 83436  |
| SSD | South Sudan | 37122 | Fashooda      | 0.00 | 0.00 | 0.00 | 75072  | 75072  | 75072  |
| SSD | South Sudan | 37123 | Malut         | 0.00 | 0.00 | 0.00 | 99208  | 99208  | 99208  |
| SSD | South Sudan | 37124 | Mayot         | 0.00 | 0.00 | 0.00 | 205268 | 205268 | 205268 |
| SSD | South Sudan | 37125 | Sobat         | 0.00 | 0.00 | 0.00 | 326144 | 326144 | 326144 |
| SSD | South Sudan | 37126 | Tonga         | 0.00 | 0.00 | 0.00 | 214109 | 214109 | 214109 |
| SSD | South Sudan | 37127 | Gogrial       | 0.00 | 0.00 | 0.00 | 370861 | 370861 | 370861 |
| SSD | South Sudan | 37128 | Nahr Lol      | 0.00 | 0.00 | 0.00 | 270379 | 270379 | 270379 |

|     |                       |       |                          |      |      |      |        |        |        |
|-----|-----------------------|-------|--------------------------|------|------|------|--------|--------|--------|
| SSD | South Sudan           | 37129 | Tonj                     | 0.00 | 0.00 | 0.00 | 255303 | 255303 | 255303 |
| SSD | South Sudan           | 37130 | Warab                    | 0.00 | 0.00 | 0.00 | 233629 | 233629 | 233629 |
| SSD | South Sudan           | 37131 | Nahr Jur                 | 0.00 | 0.00 | 0.00 | 68785  | 68785  | 68785  |
| SSD | South Sudan           | 37132 | Raja                     | 0.00 | 0.00 | 0.00 | 51697  | 51697  | 51697  |
| SSD | South Sudan           | 37133 | Wau                      | 0.00 | 0.00 | 0.00 | 245246 | 245246 | 245246 |
| SSD | South Sudan           | 37141 | Meridi                   | 0.00 | 0.00 | 0.00 | 176986 | 176986 | 176986 |
| SSD | South Sudan           | 37142 | Mundri                   | 0.00 | 0.00 | 0.00 | 159016 | 159016 | 159016 |
| SSD | South Sudan           | 37143 | Tombura                  | 0.00 | 0.00 | 0.00 | 148717 | 148717 | 148717 |
| SSD | South Sudan           | 37144 | Yambio                   | 0.00 | 0.00 | 0.00 | 255599 | 255599 | 255599 |
| STP | Sao Tome and Principe | 25303 | Admin unit not available | 0.32 | 0.32 | 0.32 | 3555   | 3555   | 3555   |
| STP | Sao Tome and Principe | 25304 | Admin unit not available | 0.32 | 0.32 | 0.32 | 88005  | 88005  | 88005  |
| SUR | Suriname              | 25880 | Brownsweg                | 0.14 | 0.14 | 0.14 | 1038   | 1038   | 1038   |
| SUR | Suriname              | 25881 | Centrum                  | 0.14 | 0.14 | 0.14 | 3215   | 3215   | 3215   |
| SUR | Suriname              | 25882 | Klaaskreek               | 0.14 | 0.14 | 0.14 | 1585   | 1585   | 1585   |
| SUR | Suriname              | 25883 | Kwakoegrn                | 0.14 | 0.14 | 0.14 | 203    | 203    | 203    |
| SUR | Suriname              | 25884 | Marchalkreek             | 0.14 | 0.14 | 0.14 | 531    | 531    | 531    |
| SUR | Suriname              | 25885 | Sarakreek                | 0.14 | 0.14 | 0.14 | 1696   | 1696   | 1696   |
| SUR | Suriname              | 25886 | Alkmaar                  | 0.14 | 0.14 | 0.14 | 3717   | 3717   | 3717   |
| SUR | Suriname              | 25887 | Bakki                    | 0.14 | 0.14 | 0.14 | 321    | 321    | 321    |
| SUR | Suriname              | 25888 | Margaretha               | 0.14 | 0.14 | 0.14 | 804    | 804    | 804    |
| SUR | Suriname              | 25889 | Meerzorg                 | 0.14 | 0.14 | 0.14 | 10402  | 10402  | 10402  |
| SUR | Suriname              | 25890 | Nieuw Amsterdam          | 0.14 | 0.14 | 0.14 | 3520   | 3520   | 3520   |
| SUR | Suriname              | 25891 | Tamanredjo               | 0.14 | 0.14 | 0.14 | 4591   | 4591   | 4591   |
| SUR | Suriname              | 25892 | Johanna Maria            | 0.14 | 0.14 | 0.14 | 532    | 532    | 532    |
| SUR | Suriname              | 25893 | Totness                  | 0.14 | 0.14 | 0.14 | 1397   | 1397   | 1397   |
| SUR | Suriname              | 25894 | Welgelegen               | 0.14 | 0.14 | 0.14 | 11258  | 11258  | 11258  |
| SUR | Suriname              | 25895 | Albina                   | 0.14 | 0.14 | 0.14 | 3299   | 3299   | 3299   |
| SUR | Suriname              | 25896 | Galibi                   | 0.14 | 0.14 | 0.14 | 499    | 499    | 499    |
| SUR | Suriname              | 25897 | Moengo                   | 0.14 | 0.14 | 0.14 | 7095   | 7095   | 7095   |
| SUR | Suriname              | 25898 | Moengotapoe              | 0.14 | 0.14 | 0.14 | 489    | 489    | 489    |
| SUR | Suriname              | 25899 | Patamacca                | 0.14 | 0.14 | 0.14 | 353    | 353    | 353    |
| SUR | Suriname              | 25900 | Wanhatti                 | 0.14 | 0.14 | 0.14 | 353    | 353    | 353    |
| SUR | Suriname              | 25901 | Groot Henar              | 0.14 | 0.14 | 0.14 | 1711   | 1711   | 1711   |

|     |          |       |                    |      |      |      |       |       |       |
|-----|----------|-------|--------------------|------|------|------|-------|-------|-------|
| SUR | Suriname | 25902 | Nieuw Nickerie     | 0.14 | 0.14 | 0.14 | 6758  | 6758  | 6758  |
| SUR | Suriname | 25903 | Oostelijke Polders | 0.14 | 0.14 | 0.14 | 5102  | 5102  | 5102  |
| SUR | Suriname | 25904 | Wageningen         | 0.14 | 0.14 | 0.14 | 1736  | 1736  | 1736  |
| SUR | Suriname | 25905 | Westelijke Polders | 0.14 | 0.14 | 0.14 | 4979  | 4979  | 4979  |
| SUR | Suriname | 25906 | Bigi Poika         | 0.14 | 0.14 | 0.14 | 434   | 434   | 434   |
| SUR | Suriname | 25907 | Carolina           | 0.14 | 0.14 | 0.14 | 3445  | 3445  | 3445  |
| SUR | Suriname | 25908 | Noord              | 0.14 | 0.14 | 0.14 | 7150  | 7150  | 7150  |
| SUR | Suriname | 25909 | Oost               | 0.14 | 0.14 | 0.14 | 5762  | 5762  | 5762  |
| SUR | Suriname | 25910 | Zuid               | 0.14 | 0.14 | 0.14 | 4613  | 4613  | 4613  |
| SUR | Suriname | 25911 | Beekhuizen         | 0.14 | 0.14 | 0.14 | 9476  | 9476  | 9476  |
| SUR | Suriname | 25912 | Blauwgrond         | 0.14 | 0.14 | 0.14 | 19955 | 19955 | 19955 |
| SUR | Suriname | 25913 | Centrum            | 0.14 | 0.14 | 0.14 | 10919 | 10919 | 10919 |
| SUR | Suriname | 25914 | Flora              | 0.14 | 0.14 | 0.14 | 11129 | 11129 | 11129 |
| SUR | Suriname | 25915 | Latour             | 0.14 | 0.14 | 0.14 | 17457 | 17457 | 17457 |
| SUR | Suriname | 25916 | Livorno            | 0.14 | 0.14 | 0.14 | 6344  | 6344  | 6344  |
| SUR | Suriname | 25917 | Munder             | 0.14 | 0.14 | 0.14 | 9571  | 9571  | 9571  |
| SUR | Suriname | 25918 | Pontbuiten         | 0.14 | 0.14 | 0.14 | 14546 | 14546 | 14546 |
| SUR | Suriname | 25919 | Rainville          | 0.14 | 0.14 | 0.14 | 13202 | 13202 | 13202 |
| SUR | Suriname | 25920 | Tammenga           | 0.14 | 0.14 | 0.14 | 9720  | 9720  | 9720  |
| SUR | Suriname | 25921 | Weg Naar Zee       | 0.14 | 0.14 | 0.14 | 10479 | 10479 | 10479 |
| SUR | Suriname | 25922 | Welgelegen         | 0.14 | 0.14 | 0.14 | 1641  | 1641  | 1641  |
| SUR | Suriname | 25923 | Calcutta           | 0.14 | 0.14 | 0.14 | 353   | 353   | 353   |
| SUR | Suriname | 25924 | Groningen          | 0.14 | 0.14 | 0.14 | 1641  | 1641  | 1641  |
| SUR | Suriname | 25925 | Jarikaba           | 0.14 | 0.14 | 0.14 | 4375  | 4375  | 4375  |
| SUR | Suriname | 25926 | Kampong Baroe      | 0.14 | 0.14 | 0.14 | 2140  | 2140  | 2140  |
| SUR | Suriname | 25927 | Tijgerkreek        | 0.14 | 0.14 | 0.14 | 2186  | 2186  | 2186  |
| SUR | Suriname | 25928 | Wayamboweg         | 0.14 | 0.14 | 0.14 | 1410  | 1410  | 1410  |
| SUR | Suriname | 25929 | Boven Suriname     | 0.14 | 0.14 | 0.14 | 12130 | 12130 | 12130 |
| SUR | Suriname | 25930 | Coeroeni           | 0.14 | 0.14 | 0.14 | 633   | 633   | 633   |
| SUR | Suriname | 25931 | Coppename          | 0.14 | 0.14 | 0.14 | 431   | 431   | 431   |
| SUR | Suriname | 25932 | Kabalebo           | 0.14 | 0.14 | 0.14 | 1572  | 1572  | 1572  |
| SUR | Suriname | 25933 | Saramacca          | 0.14 | 0.14 | 0.14 | 913   | 913   | 913   |
| SUR | Suriname | 25934 | Tapanahony         | 0.14 | 0.14 | 0.14 | 8917  | 8917  | 8917  |

|     |          |       |                      |      |      |      |       |       |       |
|-----|----------|-------|----------------------|------|------|------|-------|-------|-------|
| SUR | Suriname | 25935 | De Nieuwe Grond      | 0.14 | 0.14 | 0.14 | 20199 | 20199 | 20199 |
| SUR | Suriname | 25936 | Domburg              | 0.14 | 0.14 | 0.14 | 3519  | 3519  | 3519  |
| SUR | Suriname | 25937 | Houttuin             | 0.14 | 0.14 | 0.14 | 11700 | 11700 | 11700 |
| SUR | Suriname | 25938 | Koewarasan           | 0.14 | 0.14 | 0.14 | 22576 | 22576 | 22576 |
| SUR | Suriname | 25939 | Kwatta               | 0.14 | 0.14 | 0.14 | 10007 | 10007 | 10007 |
| SUR | Suriname | 25940 | Lelydorp             | 0.14 | 0.14 | 0.14 | 13897 | 13897 | 13897 |
| SUR | Suriname | 25941 | Saramacca Polder     | 0.14 | 0.14 | 0.14 | 7672  | 7672  | 7672  |
| TCD | Chad     | 65351 | Abker                | 0.18 | 0.19 | 0.19 | 29053 | 28518 | 28242 |
| TCD | Chad     | 65352 | Abou-charib-i        | 0.39 | 0.47 | 0.53 | 11514 | 9184  | 7627  |
| TCD | Chad     | 65353 | Abou-charib-ii       | 0.39 | 0.47 | 0.53 | 4438  | 3540  | 2940  |
| TCD | Chad     | 65354 | Afrouk               | 0.18 | 0.19 | 0.19 | 11673 | 11457 | 11347 |
| TCD | Chad     | 65355 | Alako                | 0.18 | 0.19 | 0.19 | 8434  | 8279  | 8199  |
| TCD | Chad     | 65356 | Am-timan             | 0.18 | 0.19 | 0.19 | 36734 | 36057 | 35709 |
| TCD | Chad     | 65357 | Amdobak              | 0.18 | 0.19 | 0.19 | 16883 | 16572 | 16412 |
| TCD | Chad     | 65358 | Amladoba             | 0.18 | 0.19 | 0.19 | 17966 | 17635 | 17465 |
| TCD | Chad     | 65359 | Andoum               | 0.18 | 0.19 | 0.19 | 18030 | 17698 | 17527 |
| TCD | Chad     | 65360 | Arada                | 0.39 | 0.47 | 0.53 | 39981 | 31892 | 26485 |
| TCD | Chad     | 65361 | Autochtone           | 0.18 | 0.19 | 0.19 | 19935 | 19568 | 19379 |
| TCD | Chad     | 65362 | Ba-illi              | 0.18 | 0.19 | 0.19 | 42053 | 41278 | 40880 |
| TCD | Chad     | 65363 | Bagaye               | 0.18 | 0.19 | 0.19 | 13682 | 13430 | 13301 |
| TCD | Chad     | 65364 | Bah                  | 0.18 | 0.19 | 0.19 | 7104  | 6973  | 6906  |
| TCD | Chad     | 65365 | Bakhat               | 0.18 | 0.19 | 0.19 | 4556  | 4472  | 4429  |
| TCD | Chad     | 65366 | Bale                 | 0.18 | 0.19 | 0.19 | 10566 | 10372 | 10272 |
| TCD | Chad     | 65367 | Bali                 | 0.39 | 0.47 | 0.53 | 3574  | 2851  | 2368  |
| TCD | Chad     | 65368 | Balimba              | 0.18 | 0.19 | 0.19 | 27531 | 27023 | 26762 |
| TCD | Chad     | 65369 | Baltoubaye           | 0.18 | 0.19 | 0.19 | 7018  | 6888  | 6822  |
| TCD | Chad     | 65370 | Banda                | 0.18 | 0.19 | 0.19 | 7505  | 7366  | 7295  |
| TCD | Chad     | 65371 | Bandala              | 0.18 | 0.19 | 0.19 | 4087  | 4012  | 3973  |
| TCD | Chad     | 65372 | Bangoul              | 0.18 | 0.19 | 0.19 | 6651  | 6528  | 6465  |
| TCD | Chad     | 65373 | Bao                  | 0.18 | 0.19 | 0.19 | 12198 | 11973 | 11857 |
| TCD | Chad     | 65374 | Barde                | 0.39 | 0.47 | 0.53 | 21449 | 17109 | 14208 |
| TCD | Chad     | 65375 | Barh-azoum-am-timan  | 0.18 | 0.19 | 0.19 | 9774  | 9594  | 9501  |
| TCD | Chad     | 65376 | Barh-azoum-goz-beida | 0.39 | 0.47 | 0.53 | 21233 | 16937 | 14065 |

|     |      |       |                  |      |      |      |       |       |       |
|-----|------|-------|------------------|------|------|------|-------|-------|-------|
| TCD | Chad | 65377 | Batha-lairi      | 0.18 | 0.19 | 0.19 | 18871 | 18523 | 18345 |
| TCD | Chad | 65378 | Bebalem          | 0.18 | 0.19 | 0.19 | 12998 | 12759 | 12636 |
| TCD | Chad | 65379 | Bebedjia         | 0.18 | 0.19 | 0.19 | 34097 | 33468 | 33145 |
| TCD | Chad | 65380 | Bebo-pen         | 0.18 | 0.19 | 0.19 | 19902 | 19535 | 19347 |
| TCD | Chad | 65381 | Beboni           | 0.18 | 0.19 | 0.19 | 22152 | 21743 | 21534 |
| TCD | Chad | 65382 | Beboro           | 0.18 | 0.19 | 0.19 | 9028  | 8861  | 8776  |
| TCD | Chad | 65383 | Beboto           | 0.18 | 0.19 | 0.19 | 43692 | 42886 | 42473 |
| TCD | Chad | 65384 | Bedaya           | 0.18 | 0.19 | 0.19 | 19516 | 19156 | 18971 |
| TCD | Chad | 65385 | Bedjondo         | 0.18 | 0.19 | 0.19 | 27344 | 26840 | 26581 |
| TCD | Chad | 65386 | Begara           | 0.18 | 0.19 | 0.19 | 6114  | 6001  | 5943  |
| TCD | Chad | 65387 | Beinamar         | 0.18 | 0.19 | 0.19 | 23601 | 23165 | 22942 |
| TCD | Chad | 65388 | Beissa           | 0.18 | 0.19 | 0.19 | 7984  | 7837  | 7761  |
| TCD | Chad | 65389 | Bekamba-koumra   | 0.18 | 0.19 | 0.19 | 15877 | 15584 | 15434 |
| TCD | Chad | 65390 | Bekamba-moissala | 0.18 | 0.19 | 0.19 | 11733 | 11516 | 11405 |
| TCD | Chad | 65391 | Bekan            | 0.18 | 0.19 | 0.19 | 21378 | 20984 | 20782 |
| TCD | Chad | 65392 | Bekourou         | 0.18 | 0.19 | 0.19 | 5286  | 5189  | 5139  |
| TCD | Chad | 65393 | Beladjia         | 0.18 | 0.19 | 0.19 | 4313  | 4234  | 4193  |
| TCD | Chad | 65394 | Bengoro          | 0.18 | 0.19 | 0.19 | 18269 | 17932 | 17759 |
| TCD | Chad | 65395 | Benoye           | 0.18 | 0.19 | 0.19 | 44462 | 43642 | 43221 |
| TCD | Chad | 65396 | Bere-tchad       | 0.18 | 0.19 | 0.19 | 35088 | 34441 | 34109 |
| TCD | Chad | 65397 | Berem            | 0.18 | 0.19 | 0.19 | 39312 | 38587 | 38215 |
| TCD | Chad | 65398 | Bero             | 0.18 | 0.19 | 0.19 | 8975  | 8809  | 8724  |
| TCD | Chad | 65399 | Bessada          | 0.18 | 0.19 | 0.19 | 23331 | 22901 | 22680 |
| TCD | Chad | 65400 | Bessao           | 0.18 | 0.19 | 0.19 | 23960 | 23518 | 23291 |
| TCD | Chad | 65401 | Bessara          | 0.18 | 0.19 | 0.19 | 4016  | 3942  | 3904  |
| TCD | Chad | 65402 | Besseye          | 0.18 | 0.19 | 0.19 | 8328  | 8175  | 8096  |
| TCD | Chad | 65403 | Beti             | 0.18 | 0.19 | 0.19 | 23435 | 23003 | 22781 |
| TCD | Chad | 65404 | Bidio            | 0.18 | 0.19 | 0.19 | 18799 | 18452 | 18274 |
| TCD | Chad | 65405 | Binder           | 0.18 | 0.19 | 0.19 | 47357 | 46484 | 46036 |
| TCD | Chad | 65406 | Bipare           | 0.18 | 0.19 | 0.19 | 5086  | 4993  | 4944  |
| TCD | Chad | 65407 | Birak            | 0.39 | 0.47 | 0.53 | 6774  | 5403  | 4487  |
| TCD | Chad | 65408 | Biramanda        | 0.18 | 0.19 | 0.19 | 13582 | 13331 | 13203 |
| TCD | Chad | 65409 | Birguit          | 0.18 | 0.19 | 0.19 | 12945 | 12706 | 12583 |

|     |      |       |              |      |      |      |        |        |        |
|-----|------|-------|--------------|------|------|------|--------|--------|--------|
| TCD | Chad | 65410 | Bitkine      | 0.18 | 0.19 | 0.19 | 25937  | 25459  | 25213  |
| TCD | Chad | 65411 | Bodo         | 0.18 | 0.19 | 0.19 | 53565  | 52577  | 52070  |
| TCD | Chad | 65412 | Bogomoro     | 0.18 | 0.19 | 0.19 | 11340  | 11130  | 11023  |
| TCD | Chad | 65413 | Bohobe       | 0.18 | 0.19 | 0.19 | 2986   | 2931   | 2902   |
| TCD | Chad | 65414 | Bokoro/tania | 0.18 | 0.19 | 0.19 | 31225  | 30649  | 30353  |
| TCD | Chad | 65415 | Bol          | 0.18 | 0.19 | 0.19 | 180982 | 177644 | 175931 |
| TCD | Chad | 65416 | Bongor       | 0.18 | 0.19 | 0.19 | 47095  | 46227  | 45781  |
| TCD | Chad | 65417 | Borkou       | 0.18 | 0.19 | 0.19 | 81282  | 79783  | 79014  |
| TCD | Chad | 65418 | Boro         | 0.18 | 0.19 | 0.19 | 80333  | 78851  | 78091  |
| TCD | Chad | 65419 | Bougoumene   | 0.18 | 0.19 | 0.19 | 20425  | 20048  | 19855  |
| TCD | Chad | 65420 | Boum-kebir   | 0.18 | 0.19 | 0.19 | 20757  | 20374  | 20178  |
| TCD | Chad | 65421 | Bourou       | 0.18 | 0.19 | 0.19 | 5955   | 5845   | 5789   |
| TCD | Chad | 65422 | Bourtail     | 0.18 | 0.19 | 0.19 | 16107  | 15810  | 15658  |
| TCD | Chad | 65423 | Bousso       | 0.18 | 0.19 | 0.19 | 59903  | 58798  | 58231  |
| TCD | Chad | 65424 | Boye-bessao  | 0.18 | 0.19 | 0.19 | 16175  | 15876  | 15723  |
| TCD | Chad | 65425 | Dababa       | 0.18 | 0.19 | 0.19 | 18585  | 18242  | 18066  |
| TCD | Chad | 65426 | Dadjile      | 0.18 | 0.19 | 0.19 | 9116   | 8948   | 8862   |
| TCD | Chad | 65427 | Dadjo        | 0.18 | 0.19 | 0.19 | 5798   | 5691   | 5636   |
| TCD | Chad | 65428 | Dadjo-i      | 0.18 | 0.19 | 0.19 | 80937  | 79444  | 78678  |
| TCD | Chad | 65429 | Dadjo-ii     | 0.18 | 0.19 | 0.19 | 30278  | 29720  | 29433  |
| TCD | Chad | 65430 | Dagal        | 0.18 | 0.19 | 0.19 | 31308  | 30731  | 30434  |
| TCD | Chad | 65431 | Daguela      | 0.18 | 0.19 | 0.19 | 31784  | 31198  | 30897  |
| TCD | Chad | 65432 | Dangaleat    | 0.18 | 0.19 | 0.19 | 6534   | 6414   | 6352   |
| TCD | Chad | 65433 | Dar-salim    | 0.18 | 0.19 | 0.19 | 13391  | 13144  | 13017  |
| TCD | Chad | 65434 | Darbe        | 0.18 | 0.19 | 0.19 | 3189   | 3131   | 3100   |
| TCD | Chad | 65435 | Dari         | 0.18 | 0.19 | 0.19 | 15367  | 15084  | 14938  |
| TCD | Chad | 65436 | Dekakire     | 0.18 | 0.19 | 0.19 | 2560   | 2513   | 2489   |
| TCD | Chad | 65437 | Delbian      | 0.18 | 0.19 | 0.19 | 23888  | 23447  | 23221  |
| TCD | Chad | 65438 | Deli         | 0.18 | 0.19 | 0.19 | 10032  | 9847   | 9752   |
| TCD | Chad | 65439 | Dembo        | 0.18 | 0.19 | 0.19 | 14613  | 14343  | 14205  |
| TCD | Chad | 65440 | Deredia      | 0.18 | 0.19 | 0.19 | 10911  | 10710  | 10607  |
| TCD | Chad | 65441 | Deressia     | 0.18 | 0.19 | 0.19 | 17251  | 16933  | 16769  |
| TCD | Chad | 65442 | Dhok/dopdop  | 0.18 | 0.19 | 0.19 | 9324   | 9152   | 9064   |



|     |      |       |                     |      |      |      |        |        |        |
|-----|------|-------|---------------------|------|------|------|--------|--------|--------|
| TCD | Chad | 65443 | Dilingala           | 0.18 | 0.19 | 0.19 | 15479  | 15193  | 15047  |
| TCD | Chad | 65444 | Dindje              | 0.18 | 0.19 | 0.19 | 5170   | 5074   | 5026   |
| TCD | Chad | 65445 | Djaatne             | 0.18 | 0.19 | 0.19 | 2663   | 2614   | 2588   |
| TCD | Chad | 65446 | Djarao              | 0.18 | 0.19 | 0.19 | 11242  | 11035  | 10928  |
| TCD | Chad | 65447 | Djimeze             | 0.39 | 0.47 | 0.53 | 6300   | 5026   | 4174   |
| TCD | Chad | 65448 | Djoli               | 0.18 | 0.19 | 0.19 | 7810   | 7666   | 7592   |
| TCD | Chad | 65449 | Djonkor-aboutelfane | 0.18 | 0.19 | 0.19 | 25400  | 24931  | 24691  |
| TCD | Chad | 65450 | Djonkor-guera       | 0.18 | 0.19 | 0.19 | 7157   | 7025   | 6958   |
| TCD | Chad | 65451 | Djoumane            | 0.18 | 0.19 | 0.19 | 3858   | 3787   | 3750   |
| TCD | Chad | 65452 | Doba                | 0.18 | 0.19 | 0.19 | 34554  | 33917  | 33590  |
| TCD | Chad | 65453 | Dobo                | 0.18 | 0.19 | 0.19 | 14180  | 13919  | 13784  |
| TCD | Chad | 65454 | Dodinda             | 0.18 | 0.19 | 0.19 | 7437   | 7300   | 7229   |
| TCD | Chad | 65455 | Dokora              | 0.18 | 0.19 | 0.19 | 5592   | 5489   | 5436   |
| TCD | Chad | 65456 | Domo                | 0.18 | 0.19 | 0.19 | 15421  | 15137  | 14991  |
| TCD | Chad | 65457 | Dormon              | 0.18 | 0.19 | 0.19 | 3223   | 3163   | 3133   |
| TCD | Chad | 65458 | Doubadene           | 0.18 | 0.19 | 0.19 | 6615   | 6493   | 6430   |
| TCD | Chad | 65459 | Doudeye             | 0.18 | 0.19 | 0.19 | 19584  | 19222  | 19037  |
| TCD | Chad | 65460 | Doue                | 0.18 | 0.19 | 0.19 | 31507  | 30926  | 30628  |
| TCD | Chad | 65461 | Dourbali/abouguerne | 0.18 | 0.19 | 0.19 | 54290  | 53289  | 52775  |
| TCD | Chad | 65462 | Dourene             | 0.39 | 0.47 | 0.53 | 8903   | 7101   | 5897   |
| TCD | Chad | 65463 | El-fass             | 0.18 | 0.19 | 0.19 | 8996   | 8830   | 8745   |
| TCD | Chad | 65464 | Ennedi              | 0.18 | 0.19 | 0.19 | 119793 | 117584 | 116450 |
| TCD | Chad | 65465 | Erde-pala           | 0.18 | 0.19 | 0.19 | 81261  | 79762  | 78993  |
| TCD | Chad | 65466 | Ere                 | 0.18 | 0.19 | 0.19 | 2235   | 2194   | 2173   |
| TCD | Chad | 65467 | Fare                | 0.39 | 0.47 | 0.53 | 2530   | 2018   | 1676   |
| TCD | Chad | 65468 | Fianga              | 0.18 | 0.19 | 0.19 | 33125  | 32514  | 32200  |
| TCD | Chad | 65469 | Fitri               | 0.18 | 0.19 | 0.19 | 90881  | 89205  | 88344  |
| TCD | Chad | 65470 | Fongoro             | 0.39 | 0.47 | 0.53 | 22874  | 18246  | 15152  |
| TCD | Chad | 65471 | Gabian              | 0.18 | 0.19 | 0.19 | 16808  | 16498  | 16339  |
| TCD | Chad | 65472 | Gabri-ngolo         | 0.18 | 0.19 | 0.19 | 6508   | 6388   | 6326   |
| TCD | Chad | 65473 | Gadjibian           | 0.18 | 0.19 | 0.19 | 18506  | 18165  | 17989  |
| TCD | Chad | 65474 | Gagal               | 0.18 | 0.19 | 0.19 | 25695  | 25221  | 24978  |
| TCD | Chad | 65475 | Gami                | 0.18 | 0.19 | 0.19 | 18414  | 18074  | 17900  |

|     |      |       |                    |      |      |      |        |        |        |
|-----|------|-------|--------------------|------|------|------|--------|--------|--------|
| TCD | Chad | 65476 | Gnere              | 0.39 | 0.47 | 0.53 | 7974   | 6361   | 5282   |
| TCD | Chad | 65477 | Gogmi              | 0.18 | 0.19 | 0.19 | 7465   | 7327   | 7256   |
| TCD | Chad | 65478 | Gon                | 0.18 | 0.19 | 0.19 | 7668   | 7526   | 7454   |
| TCD | Chad | 65479 | Gore               | 0.18 | 0.19 | 0.19 | 14342  | 14078  | 13942  |
| TCD | Chad | 65480 | Gore-loc           | 0.18 | 0.19 | 0.19 | 14367  | 14102  | 13966  |
| TCD | Chad | 65481 | Gouey-goudoum      | 0.18 | 0.19 | 0.19 | 8818   | 8655   | 8571   |
| TCD | Chad | 65482 | Gouin              | 0.18 | 0.19 | 0.19 | 6929   | 6801   | 6736   |
| TCD | Chad | 65483 | Goulaye            | 0.18 | 0.19 | 0.19 | 32411  | 31813  | 31507  |
| TCD | Chad | 65484 | Goumadji           | 0.18 | 0.19 | 0.19 | 9025   | 8858   | 8773   |
| TCD | Chad | 65485 | Goundi             | 0.18 | 0.19 | 0.19 | 34162  | 33532  | 33209  |
| TCD | Chad | 65486 | Gounou             | 0.18 | 0.19 | 0.19 | 22370  | 21958  | 21746  |
| TCD | Chad | 65487 | Gounou-gaya        | 0.18 | 0.19 | 0.19 | 13952  | 13695  | 13562  |
| TCD | Chad | 65488 | Gourouf            | 0.39 | 0.47 | 0.53 | 4284   | 3417   | 2838   |
| TCD | Chad | 65489 | Goz-beida          | 0.39 | 0.47 | 0.53 | 9589   | 7649   | 6352   |
| TCD | Chad | 65490 | Guegou             | 0.18 | 0.19 | 0.19 | 3092   | 3035   | 3005   |
| TCD | Chad | 65491 | Guereda            | 0.39 | 0.47 | 0.53 | 4198   | 3349   | 2781   |
| TCD | Chad | 65492 | Guergne            | 0.39 | 0.47 | 0.53 | 25377  | 20242  | 16810  |
| TCD | Chad | 65493 | Guerra             | 0.18 | 0.19 | 0.19 | 34503  | 33866  | 33540  |
| TCD | Chad | 65494 | Ham                | 0.18 | 0.19 | 0.19 | 4926   | 4835   | 4788   |
| TCD | Chad | 65495 | Hemat-am-timan     | 0.18 | 0.19 | 0.19 | 10487  | 10293  | 10194  |
| TCD | Chad | 65496 | Hemat-haraze       | 0.18 | 0.19 | 0.19 | 7424   | 7287   | 7217   |
| TCD | Chad | 65497 | Illili             | 0.18 | 0.19 | 0.19 | 5141   | 5047   | 4998   |
| TCD | Chad | 65498 | Kaba-donia         | 0.18 | 0.19 | 0.19 | 6434   | 6315   | 6254   |
| TCD | Chad | 65499 | Kaba-roangar       | 0.18 | 0.19 | 0.19 | 8082   | 7933   | 7856   |
| TCD | Chad | 65500 | Kabalaye           | 0.18 | 0.19 | 0.19 | 12157  | 11932  | 11817  |
| TCD | Chad | 65501 | Kachimel-abeche    | 0.18 | 0.19 | 0.19 | 104917 | 102982 | 101989 |
| TCD | Chad | 65502 | Kadada             | 0.18 | 0.19 | 0.19 | 121356 | 119118 | 117969 |
| TCD | Chad | 65503 | Kadjeske-am-dam    | 0.18 | 0.19 | 0.19 | 45213  | 44379  | 43951  |
| TCD | Chad | 65504 | Kadjeske-goz-beida | 0.39 | 0.47 | 0.53 | 9281   | 7404   | 6148   |
| TCD | Chad | 65505 | Kado               | 0.39 | 0.47 | 0.53 | 21672  | 17288  | 14356  |
| TCD | Chad | 65506 | Kaga               | 0.18 | 0.19 | 0.19 | 2617   | 2569   | 2544   |
| TCD | Chad | 65507 | Kapka-bakaore      | 0.39 | 0.47 | 0.53 | 16759  | 13368  | 11102  |
| TCD | Chad | 65508 | Kara/maibo-goulaye | 0.18 | 0.19 | 0.19 | 47513  | 46637  | 46187  |

|     |      |       |                 |      |      |      |       |       |       |
|-----|------|-------|-----------------|------|------|------|-------|-------|-------|
| TCD | Chad | 65509 | Kariade-boum    | 0.18 | 0.19 | 0.19 | 10801 | 10602 | 10500 |
| TCD | Chad | 65510 | Kassine         | 0.39 | 0.47 | 0.53 | 7477  | 5964  | 4953  |
| TCD | Chad | 65511 | Katoa           | 0.18 | 0.19 | 0.19 | 23119 | 22693 | 22474 |
| TCD | Chad | 65512 | Kelo            | 0.18 | 0.19 | 0.19 | 57616 | 56554 | 56008 |
| TCD | Chad | 65513 | Kenga           | 0.18 | 0.19 | 0.19 | 82070 | 80557 | 79780 |
| TCD | Chad | 65514 | Kera            | 0.18 | 0.19 | 0.19 | 29427 | 28885 | 28606 |
| TCD | Chad | 65515 | Keuni           | 0.18 | 0.19 | 0.19 | 22092 | 21685 | 21476 |
| TCD | Chad | 65516 | Khozam          | 0.18 | 0.19 | 0.19 | 7994  | 7846  | 7770  |
| TCD | Chad | 65517 | Kibet-angreb    | 0.18 | 0.19 | 0.19 | 7066  | 6935  | 6868  |
| TCD | Chad | 65518 | Kibet-soum-soum | 0.18 | 0.19 | 0.19 | 2953  | 2899  | 2871  |
| TCD | Chad | 65519 | Kim             | 0.18 | 0.19 | 0.19 | 28940 | 28406 | 28132 |
| TCD | Chad | 65520 | Kimre           | 0.18 | 0.19 | 0.19 | 5243  | 5146  | 5096  |
| TCD | Chad | 65521 | Kobe-nord-est   | 0.39 | 0.47 | 0.53 | 24843 | 19817 | 16457 |
| TCD | Chad | 65522 | Kobe-nord-ouest | 0.39 | 0.47 | 0.53 | 14408 | 11493 | 9544  |
| TCD | Chad | 65523 | Kobe-sud        | 0.39 | 0.47 | 0.53 | 17558 | 14005 | 11631 |
| TCD | Chad | 65524 | Kodoye-i        | 0.39 | 0.47 | 0.53 | 1954  | 1559  | 1294  |
| TCD | Chad | 65525 | Kodoye-ii       | 0.39 | 0.47 | 0.53 | 689   | 550   | 456   |
| TCD | Chad | 65526 | Koffa           | 0.18 | 0.19 | 0.19 | 14713 | 14442 | 14303 |
| TCD | Chad | 65527 | Kognere         | 0.18 | 0.19 | 0.19 | 28353 | 27830 | 27562 |
| TCD | Chad | 65528 | Kokaga          | 0.18 | 0.19 | 0.19 | 25327 | 24860 | 24620 |
| TCD | Chad | 65529 | Koldaga         | 0.18 | 0.19 | 0.19 | 14202 | 13940 | 13806 |
| TCD | Chad | 65530 | Kolobo          | 0.18 | 0.19 | 0.19 | 834   | 819   | 811   |
| TCD | Chad | 65531 | Kolon           | 0.18 | 0.19 | 0.19 | 30200 | 29643 | 29357 |
| TCD | Chad | 65532 | Kolonga         | 0.39 | 0.47 | 0.53 | 7571  | 6039  | 5015  |
| TCD | Chad | 65533 | Koloye          | 0.39 | 0.47 | 0.53 | 14898 | 11883 | 9869  |
| TCD | Chad | 65534 | Kome/ndobebe    | 0.18 | 0.19 | 0.19 | 24701 | 24245 | 24011 |
| TCD | Chad | 65535 | Korbo/kordo     | 0.18 | 0.19 | 0.19 | 10092 | 9906  | 9811  |
| TCD | Chad | 65536 | Korbol          | 0.18 | 0.19 | 0.19 | 55269 | 54249 | 53726 |
| TCD | Chad | 65537 | Korio           | 0.18 | 0.19 | 0.19 | 32188 | 31594 | 31289 |
| TCD | Chad | 65538 | Koro-tchad      | 0.18 | 0.19 | 0.19 | 3376  | 3314  | 3282  |
| TCD | Chad | 65539 | Koskobo         | 0.18 | 0.19 | 0.19 | 4534  | 4451  | 4408  |
| TCD | Chad | 65540 | Kotongoro       | 0.18 | 0.19 | 0.19 | 668   | 656   | 649   |
| TCD | Chad | 65541 | Kouga-tchad     | 0.18 | 0.19 | 0.19 | 13292 | 13047 | 12921 |

|     |      |       |                |      |      |      |       |       |       |
|-----|------|-------|----------------|------|------|------|-------|-------|-------|
| TCD | Chad | 65542 | Kouka-adjob    | 0.18 | 0.19 | 0.19 | 11335 | 11126 | 11018 |
| TCD | Chad | 65543 | Kouka-ati      | 0.18 | 0.19 | 0.19 | 21049 | 20661 | 20462 |
| TCD | Chad | 65544 | Koumi          | 0.18 | 0.19 | 0.19 | 24019 | 23576 | 23348 |
| TCD | Chad | 65545 | Koumogo        | 0.18 | 0.19 | 0.19 | 16835 | 16524 | 16365 |
| TCD | Chad | 65546 | Koumra         | 0.18 | 0.19 | 0.19 | 73160 | 71811 | 71118 |
| TCD | Chad | 65547 | Koursigue      | 0.39 | 0.47 | 0.53 | 4164  | 3322  | 2758  |
| TCD | Chad | 65548 | Koutoutou      | 0.18 | 0.19 | 0.19 | 10416 | 10224 | 10125 |
| TCD | Chad | 65549 | Krim-krim      | 0.18 | 0.19 | 0.19 | 40574 | 39825 | 39441 |
| TCD | Chad | 65550 | Kyabe          | 0.18 | 0.19 | 0.19 | 21707 | 21306 | 21101 |
| TCD | Chad | 65551 | Lagon          | 0.18 | 0.19 | 0.19 | 57771 | 56706 | 56159 |
| TCD | Chad | 65552 | Lai            | 0.18 | 0.19 | 0.19 | 26266 | 25781 | 25533 |
| TCD | Chad | 65553 | Lame           | 0.18 | 0.19 | 0.19 | 13457 | 13209 | 13082 |
| TCD | Chad | 65554 | Lao-kassi      | 0.18 | 0.19 | 0.19 | 10637 | 10441 | 10341 |
| TCD | Chad | 65555 | Lele           | 0.18 | 0.19 | 0.19 | 52952 | 51975 | 51474 |
| TCD | Chad | 65556 | Leo-mbassa     | 0.18 | 0.19 | 0.19 | 14370 | 14105 | 13969 |
| TCD | Chad | 65557 | Lere-tchad     | 0.18 | 0.19 | 0.19 | 63593 | 62420 | 61818 |
| TCD | Chad | 65558 | Lima           | 0.39 | 0.47 | 0.53 | 17147 | 13677 | 11358 |
| TCD | Chad | 65559 | Loumbogo       | 0.18 | 0.19 | 0.19 | 6841  | 6715  | 6650  |
| TCD | Chad | 65560 | Mabraone       | 0.39 | 0.47 | 0.53 | 5734  | 4574  | 3798  |
| TCD | Chad | 65561 | Mabrone        | 0.39 | 0.47 | 0.53 | 20613 | 16442 | 13655 |
| TCD | Chad | 65562 | Madiago        | 0.18 | 0.19 | 0.19 | 44119 | 43306 | 42888 |
| TCD | Chad | 65563 | Magao          | 0.18 | 0.19 | 0.19 | 17548 | 17225 | 17059 |
| TCD | Chad | 65564 | Mahim-toki     | 0.18 | 0.19 | 0.19 | 14593 | 14324 | 14185 |
| TCD | Chad | 65565 | Mai-ache       | 0.18 | 0.19 | 0.19 | 11125 | 10920 | 10815 |
| TCD | Chad | 65566 | Maibo-mbaye    | 0.18 | 0.19 | 0.19 | 17194 | 16877 | 16714 |
| TCD | Chad | 65567 | Malboum/hollom | 0.18 | 0.19 | 0.19 | 51690 | 50736 | 50247 |
| TCD | Chad | 65568 | Mandjafa       | 0.18 | 0.19 | 0.19 | 22338 | 21926 | 21714 |
| TCD | Chad | 65569 | Mandjobo       | 0.18 | 0.19 | 0.19 | 29091 | 28555 | 28279 |
| TCD | Chad | 65570 | Mango          | 0.18 | 0.19 | 0.19 | 10384 | 10193 | 10094 |
| TCD | Chad | 65571 | Mangueigne     | 0.18 | 0.19 | 0.19 | 5085  | 4991  | 4943  |
| TCD | Chad | 65572 | Mani           | 0.18 | 0.19 | 0.19 | 53457 | 52471 | 51965 |
| TCD | Chad | 65573 | Manso          | 0.18 | 0.19 | 0.19 | 6791  | 6666  | 6602  |
| TCD | Chad | 65574 | Marabe         | 0.18 | 0.19 | 0.19 | 4234  | 4156  | 4116  |

|     |      |       |                     |      |      |      |        |        |        |
|-----|------|-------|---------------------|------|------|------|--------|--------|--------|
| TCD | Chad | 65575 | Marba               | 0.18 | 0.19 | 0.19 | 38774  | 38059  | 37692  |
| TCD | Chad | 65576 | Marfa               | 0.18 | 0.19 | 0.19 | 26842  | 26347  | 26092  |
| TCD | Chad | 65577 | Maro                | 0.18 | 0.19 | 0.19 | 81394  | 79893  | 79122  |
| TCD | Chad | 65578 | Massaguet           | 0.18 | 0.19 | 0.19 | 54999  | 53984  | 53464  |
| TCD | Chad | 65579 | Massakory           | 0.18 | 0.19 | 0.19 | 148145 | 145413 | 144010 |
| TCD | Chad | 65580 | Massalat-am-dam     | 0.18 | 0.19 | 0.19 | 9628   | 9451   | 9360   |
| TCD | Chad | 65581 | Massalat-oum-hadjer | 0.18 | 0.19 | 0.19 | 40376  | 39631  | 39249  |
| TCD | Chad | 65582 | Massenya            | 0.18 | 0.19 | 0.19 | 39785  | 39051  | 38674  |
| TCD | Chad | 65583 | Matekaga            | 0.18 | 0.19 | 0.19 | 6516   | 6396   | 6334   |
| TCD | Chad | 65584 | Mayakne             | 0.18 | 0.19 | 0.19 | 3654   | 3587   | 3552   |
| TCD | Chad | 65585 | Mbaikoro            | 0.18 | 0.19 | 0.19 | 36961  | 36280  | 35930  |
| TCD | Chad | 65586 | Mbaissaye           | 0.18 | 0.19 | 0.19 | 19008  | 18658  | 18478  |
| TCD | Chad | 65587 | Mbalkabra           | 0.18 | 0.19 | 0.19 | 18246  | 17909  | 17737  |
| TCD | Chad | 65588 | Mballa              | 0.18 | 0.19 | 0.19 | 32311  | 31715  | 31409  |
| TCD | Chad | 65589 | Mbaouroye           | 0.18 | 0.19 | 0.19 | 265    | 260    | 258    |
| TCD | Chad | 65590 | Mbikou              | 0.18 | 0.19 | 0.19 | 6990   | 6861   | 6795   |
| TCD | Chad | 65591 | Mbouroum            | 0.18 | 0.19 | 0.19 | 7895   | 7749   | 7675   |
| TCD | Chad | 65592 | Medego              | 0.18 | 0.19 | 0.19 | 10029  | 9844   | 9749   |
| TCD | Chad | 65593 | Melfi               | 0.18 | 0.19 | 0.19 | 20292  | 19918  | 19726  |
| TCD | Chad | 65594 | Mesme               | 0.18 | 0.19 | 0.19 | 58277  | 57202  | 56650  |
| TCD | Chad | 65595 | Mesmedje            | 0.18 | 0.19 | 0.19 | 6914   | 6787   | 6721   |
| TCD | Chad | 65596 | Miandoum            | 0.18 | 0.19 | 0.19 | 18053  | 17720  | 17549  |
| TCD | Chad | 65597 | Michemire           | 0.18 | 0.19 | 0.19 | 37103  | 36419  | 36067  |
| TCD | Chad | 65598 | Miladi              | 0.18 | 0.19 | 0.19 | 8729   | 8568   | 8485   |
| TCD | Chad | 65599 | Miltou-gourgara     | 0.18 | 0.19 | 0.19 | 46708  | 45847  | 45405  |
| TCD | Chad | 65600 | Mimi                | 0.39 | 0.47 | 0.53 | 10927  | 8717   | 7239   |
| TCD | Chad | 65601 | Mitau               | 0.18 | 0.19 | 0.19 | 18332  | 17994  | 17820  |
| TCD | Chad | 65602 | Moal                | 0.18 | 0.19 | 0.19 | 9598   | 9421   | 9330   |
| TCD | Chad | 65603 | Mogroum             | 0.18 | 0.19 | 0.19 | 22555  | 22139  | 21925  |
| TCD | Chad | 65604 | Moissala            | 0.18 | 0.19 | 0.19 | 10955  | 10753  | 10649  |
| TCD | Chad | 65605 | Moito               | 0.18 | 0.19 | 0.19 | 65250  | 64046  | 63429  |
| TCD | Chad | 65606 | Mokofi              | 0.18 | 0.19 | 0.19 | 6226   | 6111   | 6052   |
| TCD | Chad | 65607 | Molou               | 0.39 | 0.47 | 0.53 | 37390  | 29825  | 24768  |

|     |      |       |                 |      |      |      |        |        |        |
|-----|------|-------|-----------------|------|------|------|--------|--------|--------|
| TCD | Chad | 65608 | Mondo           | 0.18 | 0.19 | 0.19 | 18961  | 18612  | 18432  |
| TCD | Chad | 65609 | Mont-de-lam     | 0.18 | 0.19 | 0.19 | 11694  | 11478  | 11368  |
| TCD | Chad | 65610 | Moore           | 0.39 | 0.47 | 0.53 | 4937   | 3938   | 3270   |
| TCD | Chad | 65611 | Motoa           | 0.18 | 0.19 | 0.19 | 6614   | 6492   | 6429   |
| TCD | Chad | 65612 | Moubi-goz       | 0.18 | 0.19 | 0.19 | 13569  | 13319  | 13190  |
| TCD | Chad | 65613 | Moubi-hadaba    | 0.18 | 0.19 | 0.19 | 9319   | 9147   | 9059   |
| TCD | Chad | 65614 | Moubi-zarga     | 0.18 | 0.19 | 0.19 | 23113  | 22687  | 22468  |
| TCD | Chad | 65615 | Moufa           | 0.18 | 0.19 | 0.19 | 6780   | 6655   | 6591   |
| TCD | Chad | 65616 | Moundou/koutou  | 0.18 | 0.19 | 0.19 | 57922  | 56854  | 56306  |
| TCD | Chad | 65617 | Mouroum-goulaye | 0.18 | 0.19 | 0.19 | 12804  | 12568  | 12447  |
| TCD | Chad | 65618 | Mouroum-touloum | 0.18 | 0.19 | 0.19 | 4477   | 4394   | 4352   |
| TCD | Chad | 65619 | Mourro          | 0.39 | 0.47 | 0.53 | 8746   | 6977   | 5794   |
| TCD | Chad | 65620 | Mourzigui       | 0.18 | 0.19 | 0.19 | 12664  | 12430  | 12310  |
| TCD | Chad | 65621 | Moussmare       | 0.18 | 0.19 | 0.19 | 6536   | 6415   | 6353   |
| TCD | Chad | 65622 | Moussafoyo      | 0.18 | 0.19 | 0.19 | 14167  | 13906  | 13772  |
| TCD | Chad | 65623 | Moussoro        | 0.18 | 0.19 | 0.19 | 116571 | 114421 | 113318 |
| TCD | Chad | 65624 | Nadili          | 0.18 | 0.19 | 0.19 | 9017   | 8850   | 8765   |
| TCD | Chad | 65625 | Nankesse        | 0.18 | 0.19 | 0.19 | 2566   | 2519   | 2495   |
| TCD | Chad | 65626 | Nassian         | 0.18 | 0.19 | 0.19 | 10971  | 10768  | 10665  |
| TCD | Chad | 65627 | Ndam            | 0.18 | 0.19 | 0.19 | 16325  | 16024  | 15870  |
| TCD | Chad | 65628 | Nderguigui      | 0.18 | 0.19 | 0.19 | 15646  | 15357  | 15209  |
| TCD | Chad | 65629 | Ndjamena        | 0.18 | 0.19 | 0.19 | 772438 | 758191 | 750878 |
| TCD | Chad | 65630 | Ndjokou         | 0.18 | 0.19 | 0.19 | 21472  | 21076  | 20872  |
| TCD | Chad | 65631 | Ngalo           | 0.18 | 0.19 | 0.19 | 18299  | 17962  | 17789  |
| TCD | Chad | 65632 | Ngam            | 0.18 | 0.19 | 0.19 | 18182  | 17847  | 17675  |
| TCD | Chad | 65633 | Ngamongo        | 0.18 | 0.19 | 0.19 | 2649   | 2600   | 2575   |
| TCD | Chad | 65634 | Ngangara        | 0.18 | 0.19 | 0.19 | 7597   | 7457   | 7385   |
| TCD | Chad | 65635 | Ngondong        | 0.18 | 0.19 | 0.19 | 18555  | 18213  | 18038  |
| TCD | Chad | 65636 | Ngouri          | 0.18 | 0.19 | 0.19 | 169105 | 165986 | 164385 |
| TCD | Chad | 65637 | Niellim         | 0.18 | 0.19 | 0.19 | 9426   | 9252   | 9163   |
| TCD | Chad | 65638 | Ninga           | 0.18 | 0.19 | 0.19 | 7535   | 7396   | 7325   |
| TCD | Chad | 65639 | Nokou           | 0.18 | 0.19 | 0.19 | 27866  | 27352  | 27088  |
| TCD | Chad | 65640 | Ntiona          | 0.18 | 0.19 | 0.19 | 42633  | 41847  | 41443  |

|     |      |       |                      |      |      |      |        |        |        |
|-----|------|-------|----------------------|------|------|------|--------|--------|--------|
| TCD | Chad | 65641 | Ouadi-chok-abougouda | 0.18 | 0.19 | 0.19 | 28512  | 27986  | 27716  |
| TCD | Chad | 65642 | Ouadi-habile         | 0.39 | 0.47 | 0.53 | 8794   | 7015   | 5825   |
| TCD | Chad | 65643 | Ouadi-hamra          | 0.18 | 0.19 | 0.19 | 28528  | 28001  | 27731  |
| TCD | Chad | 65644 | Ouadi-kadja          | 0.39 | 0.47 | 0.53 | 8419   | 6716   | 5577   |
| TCD | Chad | 65645 | Oudoumian            | 0.18 | 0.19 | 0.19 | 8868   | 8704   | 8620   |
| TCD | Chad | 65646 | Ouled-djema          | 0.39 | 0.47 | 0.53 | 12453  | 9934   | 8249   |
| TCD | Chad | 65647 | Ouled-himed          | 0.18 | 0.19 | 0.19 | 33166  | 32554  | 32240  |
| TCD | Chad | 65648 | Ouled-rachid         | 0.18 | 0.19 | 0.19 | 64439  | 63251  | 62641  |
| TCD | Chad | 65649 | Ouli-koure           | 0.39 | 0.47 | 0.53 | 6931   | 5529   | 4591   |
| TCD | Chad | 65650 | Pandzangue           | 0.18 | 0.19 | 0.19 | 7197   | 7064   | 6996   |
| TCD | Chad | 65651 | Pao                  | 0.18 | 0.19 | 0.19 | 15060  | 14783  | 14640  |
| TCD | Chad | 65652 | Peni-tchad           | 0.18 | 0.19 | 0.19 | 22032  | 21626  | 21417  |
| TCD | Chad | 65653 | Rachid               | 0.18 | 0.19 | 0.19 | 23427  | 22995  | 22773  |
| TCD | Chad | 65654 | Ratanine-har-djombo  | 0.18 | 0.19 | 0.19 | 55972  | 54939  | 54410  |
| TCD | Chad | 65655 | Rig-rig              | 0.18 | 0.19 | 0.19 | 6471   | 6351   | 6290   |
| TCD | Chad | 65656 | Saar                 | 0.18 | 0.19 | 0.19 | 7888   | 7742   | 7668   |
| TCD | Chad | 65657 | Salal                | 0.18 | 0.19 | 0.19 | 51915  | 50957  | 50466  |
| TCD | Chad | 65658 | Salamat              | 0.18 | 0.19 | 0.19 | 33967  | 33341  | 33019  |
| TCD | Chad | 65659 | Salamat-am-timan     | 0.18 | 0.19 | 0.19 | 33891  | 33266  | 32945  |
| TCD | Chad | 65660 | Salamata             | 0.18 | 0.19 | 0.19 | 23553  | 23118  | 22895  |
| TCD | Chad | 65661 | Sama                 | 0.18 | 0.19 | 0.19 | 10965  | 10763  | 10659  |
| TCD | Chad | 65662 | Sara-arabe           | 0.18 | 0.19 | 0.19 | 13323  | 13077  | 12951  |
| TCD | Chad | 65663 | Sarh                 | 0.18 | 0.19 | 0.19 | 90038  | 88377  | 87525  |
| TCD | Chad | 65664 | Sedamis-mr-mn-assine | 0.18 | 0.19 | 0.19 | 12462  | 12233  | 12115  |
| TCD | Chad | 65665 | Signar               | 0.39 | 0.47 | 0.53 | 7846   | 6258   | 5197   |
| TCD | Chad | 65666 | Simegotobe           | 0.18 | 0.19 | 0.19 | 3546   | 3481   | 3447   |
| TCD | Chad | 65667 | Singako              | 0.18 | 0.19 | 0.19 | 18008  | 17676  | 17506  |
| TCD | Chad | 65668 | Sorki                | 0.18 | 0.19 | 0.19 | 7804   | 7661   | 7587   |
| TCD | Chad | 65669 | Soumraye             | 0.18 | 0.19 | 0.19 | 31565  | 30983  | 30684  |
| TCD | Chad | 65670 | Sultanat             | 0.18 | 0.19 | 0.19 | 127381 | 125032 | 123826 |
| TCD | Chad | 65671 | Tagal                | 0.18 | 0.19 | 0.19 | 51774  | 50819  | 50329  |
| TCD | Chad | 65672 | Tagobo-foulbe        | 0.18 | 0.19 | 0.19 | 3972   | 3898   | 3861   |
| TCD | Chad | 65673 | Tagoro               | 0.18 | 0.19 | 0.19 | 1726   | 1694   | 1678   |

|     |      |       |                  |      |      |      |       |       |       |
|-----|------|-------|------------------|------|------|------|-------|-------|-------|
| TCD | Chad | 65674 | Takoua           | 0.18 | 0.19 | 0.19 | 7916  | 7770  | 7695  |
| TCD | Chad | 65675 | Tamion-ngolo     | 0.18 | 0.19 | 0.19 | 9182  | 9013  | 8926  |
| TCD | Chad | 65676 | Tapol            | 0.18 | 0.19 | 0.19 | 22554 | 22138 | 21924 |
| TCD | Chad | 65677 | Tchaguine-ngolo  | 0.18 | 0.19 | 0.19 | 14224 | 13961 | 13827 |
| TCD | Chad | 65678 | Tchaouen/saoua   | 0.18 | 0.19 | 0.19 | 2784  | 2732  | 2706  |
| TCD | Chad | 65679 | Tchedoum         | 0.18 | 0.19 | 0.19 | 5732  | 5626  | 5572  |
| TCD | Chad | 65680 | Tchoa            | 0.18 | 0.19 | 0.19 | 10346 | 10155 | 10057 |
| TCD | Chad | 65681 | Teleme           | 0.18 | 0.19 | 0.19 | 3688  | 3620  | 3585  |
| TCD | Chad | 65682 | Tibesti          | 0.18 | 0.19 | 0.19 | 16474 | 16170 | 16014 |
| TCD | Chad | 65683 | Tikem            | 0.18 | 0.19 | 0.19 | 31301 | 30723 | 30427 |
| TCD | Chad | 65684 | Timberi          | 0.18 | 0.19 | 0.19 | 20025 | 19656 | 19466 |
| TCD | Chad | 65685 | Torom            | 0.18 | 0.19 | 0.19 | 5260  | 5163  | 5113  |
| TCD | Chad | 65686 | Torrok           | 0.18 | 0.19 | 0.19 | 4154  | 4078  | 4038  |
| TCD | Chad | 65687 | Tougoude         | 0.18 | 0.19 | 0.19 | 22956 | 22533 | 22316 |
| TCD | Chad | 65688 | Toura            | 0.18 | 0.19 | 0.19 | 15940 | 15646 | 15495 |
| TCD | Chad | 65689 | Troa             | 0.39 | 0.47 | 0.53 | 6235  | 4974  | 4130  |
| TCD | Chad | 65690 | Troane           | 0.39 | 0.47 | 0.53 | 13542 | 10802 | 8970  |
| TCD | Chad | 65691 | Yalnas-abou-deia | 0.18 | 0.19 | 0.19 | 2824  | 2772  | 2745  |
| TCD | Chad | 65692 | Yalnass          | 0.18 | 0.19 | 0.19 | 1283  | 1259  | 1247  |
| TCD | Chad | 65693 | Yamodo           | 0.18 | 0.19 | 0.19 | 16733 | 16424 | 16266 |
| TCD | Chad | 65694 | Yessie/ngama     | 0.18 | 0.19 | 0.19 | 35507 | 34852 | 34516 |
| TCD | Chad | 65695 | Yomi             | 0.18 | 0.19 | 0.19 | 6077  | 5965  | 5907  |
| TCD | Chad | 65696 | Youe             | 0.18 | 0.19 | 0.19 | 14134 | 13873 | 13740 |
| TCD | Chad | 65697 | Zioud-amsak      | 0.18 | 0.19 | 0.19 | 11603 | 11389 | 11279 |
| TGO | Togo | 27386 | Tchamba          | 0.79 | 0.81 | 0.83 | 1166  | 0     | 0     |
| TGO | Togo | 27387 | Tchaoudjo        | 0.79 | 0.81 | 0.83 | 1740  | 0     | 0     |
| TGO | Togo | 27388 | Assoli           | 0.77 | 0.79 | 0.80 | 1865  | 828   | 0     |
| TGO | Togo | 27390 | Binah            | 0.77 | 0.79 | 0.80 | 2345  | 1042  | 0     |
| TGO | Togo | 27391 | Doufelgou        | 0.77 | 0.79 | 0.80 | 2796  | 1242  | 0     |
| TGO | Togo | 27392 | Keran            | 0.77 | 0.79 | 0.80 | 3255  | 1446  | 0     |
| TGO | Togo | 27393 | Kozah            | 0.77 | 0.79 | 0.80 | 8015  | 3560  | 0     |
| TGO | Togo | 27394 | Golfe            | 0.75 | 0.77 | 0.78 | 89472 | 56711 | 30328 |
| TGO | Togo | 27395 | Lacs             | 0.75 | 0.77 | 0.78 | 15726 | 9968  | 5331  |



|     |                     |       |                          |      |      |      |       |       |       |
|-----|---------------------|-------|--------------------------|------|------|------|-------|-------|-------|
| TGO | Togo                | 27396 | Vo                       | 0.75 | 0.77 | 0.78 | 12654 | 8020  | 4289  |
| TGO | Togo                | 27397 | Yoto                     | 0.75 | 0.77 | 0.78 | 10086 | 6393  | 3419  |
| TGO | Togo                | 27399 | Amou                     | 0.71 | 0.73 | 0.75 | 11229 | 8409  | 6268  |
| TGO | Togo                | 27403 | Wawa                     | 0.71 | 0.73 | 0.75 | 16716 | 12519 | 9331  |
| TGO | Togo                | 65272 | Agou                     | 0.71 | 0.73 | 0.75 | 8904  | 6668  | 4970  |
| TGO | Togo                | 65273 | Ave                      | 0.75 | 0.77 | 0.78 | 5890  | 3733  | 1997  |
| TGO | Togo                | 65274 | Bassar                   | 0.77 | 0.79 | 0.80 | 4165  | 1850  | 0     |
| TGO | Togo                | 65275 | Blitta                   | 0.79 | 0.81 | 0.83 | 1207  | 0     | 0     |
| TGO | Togo                | 65276 | Dankpen                  | 0.77 | 0.79 | 0.80 | 4422  | 1964  | 0     |
| TGO | Togo                | 65277 | Danyi                    | 0.71 | 0.73 | 0.75 | 4046  | 3030  | 2258  |
| TGO | Togo                | 65278 | Est-Mono                 | 0.71 | 0.73 | 0.75 | 12769 | 9562  | 7127  |
| TGO | Togo                | 65279 | Haho                     | 0.71 | 0.73 | 0.75 | 26391 | 19764 | 14731 |
| TGO | Togo                | 65280 | Kloto                    | 0.71 | 0.73 | 0.75 | 23295 | 17445 | 13003 |
| TGO | Togo                | 65281 | Kpendjal                 | 0.75 | 0.77 | 0.78 | 9535  | 6155  | 3439  |
| TGO | Togo                | 65282 | Moyen-Mono               | 0.71 | 0.73 | 0.75 | 8109  | 6073  | 4527  |
| TGO | Togo                | 65283 | Ogou                     | 0.71 | 0.73 | 0.75 | 34942 | 26167 | 19504 |
| TGO | Togo                | 65284 | Oti                      | 0.75 | 0.77 | 0.78 | 11870 | 7662  | 4281  |
| TGO | Togo                | 65285 | Sotouboua                | 0.79 | 0.81 | 0.83 | 1411  | 0     | 0     |
| TGO | Togo                | 65286 | Tandjouare               | 0.75 | 0.77 | 0.78 | 7095  | 4580  | 2559  |
| TGO | Togo                | 65287 | Tone                     | 0.75 | 0.77 | 0.78 | 22414 | 14469 | 8085  |
| TGO | Togo                | 65288 | Zio                      | 0.75 | 0.77 | 0.78 | 20737 | 13144 | 7029  |
| TTO | Trinidad and Tobago | 27408 | Admin unit not available | 0.64 | 0.64 | 0.64 | 5253  | 5253  | 5253  |
| TTO | Trinidad and Tobago | 27409 | Admin unit not available | 0.64 | 0.64 | 0.64 | 14284 | 14284 | 14284 |
| TTO | Trinidad and Tobago | 27410 | Admin unit not available | 0.64 | 0.64 | 0.64 | 30284 | 30284 | 30284 |
| TTO | Trinidad and Tobago | 27411 | Admin unit not available | 0.64 | 0.64 | 0.64 | 17322 | 17322 | 17322 |
| TTO | Trinidad and Tobago | 27412 | Admin unit not available | 0.64 | 0.64 | 0.64 | 15694 | 15694 | 15694 |
| TTO | Trinidad and Tobago | 27413 | Admin unit not available | 0.64 | 0.64 | 0.64 | 3501  | 3501  | 3501  |
| TTO | Trinidad and Tobago | 27414 | Admin unit not available | 0.64 | 0.64 | 0.64 | 5465  | 5465  | 5465  |
| TTO | Trinidad and Tobago | 27415 | Admin unit not available | 0.64 | 0.64 | 0.64 | 16690 | 16690 | 16690 |
| TTO | Trinidad and Tobago | 27416 | Admin unit not available | 0.64 | 0.64 | 0.64 | 6109  | 6109  | 6109  |
| TTO | Trinidad and Tobago | 27417 | Admin unit not available | 0.64 | 0.64 | 0.64 | 7184  | 7184  | 7184  |
| TTO | Trinidad and Tobago | 27418 | Admin unit not available | 0.64 | 0.64 | 0.64 | 23935 | 23935 | 23935 |
| TTO | Trinidad and Tobago | 27419 | Admin unit not available | 0.64 | 0.64 | 0.64 | 12851 | 12851 | 12851 |

|     |                             |       |                          |      |      |      |        |        |        |
|-----|-----------------------------|-------|--------------------------|------|------|------|--------|--------|--------|
| TTO | Trinidad and Tobago         | 27420 | Admin unit not available | 0.64 | 0.64 | 0.64 | 14371  | 14371  | 14371  |
| TTO | Trinidad and Tobago         | 27421 | Admin unit not available | 0.64 | 0.64 | 0.64 | 10133  | 10133  | 10133  |
| TTO | Trinidad and Tobago         | 27422 | Admin unit not available | 0.64 | 0.64 | 0.64 | 36765  | 36765  | 36765  |
| TZA | United Republic of Tanzania | 48494 | Igunga                   | 0.00 | 0.00 | 0.00 | 419142 | 419142 | 419142 |
| TZA | United Republic of Tanzania | 48492 | Singida Rural            | 0.00 | 0.00 | 0.00 | 464433 | 464433 | 464433 |
| TZA | United Republic of Tanzania | 48431 | Musoma Rural             | 0.00 | 0.00 | 0.00 | 442951 | 442951 | 442951 |
| TZA | United Republic of Tanzania | 48400 | Makete                   | 0.00 | 0.00 | 0.00 | 115324 | 115324 | 115324 |
| TZA | United Republic of Tanzania | 48419 | Kilwa                    | 0.00 | 0.00 | 0.00 | 169879 | 169879 | 169879 |
| TZA | United Republic of Tanzania | 48425 | Babati                   | 0.00 | 0.00 | 0.00 | 414030 | 414030 | 414030 |
| TZA | United Republic of Tanzania | 48486 | Maswa                    | 0.00 | 0.00 | 0.00 | 416629 | 416629 | 416629 |
| TZA | United Republic of Tanzania | 48443 | Kilombero                | 0.00 | 0.00 | 0.00 | 377077 | 377077 | 377077 |
| TZA | United Republic of Tanzania | 48397 | Iringa Urban             | 0.00 | 0.00 | 0.00 | 162517 | 162517 | 162517 |
| TZA | United Republic of Tanzania | 48441 | Mbozi                    | 0.00 | 0.00 | 0.00 | 647666 | 647666 | 647666 |
| TZA | United Republic of Tanzania | 48501 | Kilindi                  | 0.00 | 0.00 | 0.00 | 168594 | 168594 | 168594 |
| TZA | United Republic of Tanzania | 48436 | Ileje                    | 0.00 | 0.00 | 0.00 | 135031 | 135031 | 135031 |
| TZA | United Republic of Tanzania | 48386 | Monduli                  | 0.00 | 0.00 | 0.00 | 239624 | 239624 | 239624 |
| TZA | United Republic of Tanzania | 48487 | Meatu                    | 0.00 | 0.00 | 0.00 | 339517 | 339517 | 339517 |
| TZA | United Republic of Tanzania | 48402 | Njombe                   | 0.00 | 0.00 | 0.00 | 470057 | 470057 | 470057 |
| TZA | United Republic of Tanzania | 48422 | Liwale                   | 0.00 | 0.00 | 0.00 | 86029  | 86029  | 86029  |
| TZA | United Republic of Tanzania | 48424 | Ruangwa                  | 0.00 | 0.00 | 0.00 | 140674 | 140674 | 140674 |
| TZA | United Republic of Tanzania | 48417 | Rombo                    | 0.00 | 0.00 | 0.00 | 267104 | 267104 | 267104 |
| TZA | United Republic of Tanzania | 48435 | Chunya                   | 0.00 | 0.00 | 0.00 | 259792 | 259792 | 259792 |
| TZA | United Republic of Tanzania | 48394 | Kongwa                   | 0.00 | 0.00 | 0.00 | 286256 | 286256 | 286256 |
| TZA | United Republic of Tanzania | 48476 | Sumbawanga Urban         | 0.00 | 0.00 | 0.00 | 209887 | 209887 | 209887 |
| TZA | United Republic of Tanzania | 48408 | Ngara                    | 0.00 | 0.00 | 0.00 | 403007 | 403007 | 403007 |
| TZA | United Republic of Tanzania | 48421 | Lindi Urban              | 0.00 | 0.00 | 0.00 | 57064  | 57064  | 57064  |
| TZA | United Republic of Tanzania | 48459 | Nyamagana                | 0.00 | 0.00 | 0.00 | 243552 | 243552 | 243552 |
| TZA | United Republic of Tanzania | 48411 | Kigoma Rural             | 0.00 | 0.00 | 0.00 | 482041 | 482041 | 482041 |
| TZA | United Republic of Tanzania | 48429 | Simanjiro                | 0.00 | 0.00 | 0.00 | 370939 | 370939 | 370939 |
| TZA | United Republic of Tanzania | 48401 | Mufindi                  | 0.00 | 0.00 | 0.00 | 304793 | 304793 | 304793 |
| TZA | United Republic of Tanzania | 48434 | Tarime                   | 0.00 | 0.00 | 0.00 | 663532 | 663532 | 663532 |
| TZA | United Republic of Tanzania | 48499 | Uyui                     | 0.00 | 0.00 | 0.00 | 343882 | 343882 | 343882 |
| TZA | United Republic of Tanzania | 48437 | Kyela                    | 0.00 | 0.00 | 0.00 | 211263 | 211263 | 211263 |

|     |                             |       |                          |      |      |      |        |        |        |
|-----|-----------------------------|-------|--------------------------|------|------|------|--------|--------|--------|
| TZA | United Republic of Tanzania | 48491 | Manyoni                  | 0.00 | 0.00 | 0.00 | 256821 | 256821 | 256821 |
| TZA | United Republic of Tanzania | 48451 | Mtwara urban             | 0.00 | 0.00 | 0.00 | 121498 | 121498 | 121498 |
| TZA | United Republic of Tanzania | 48388 | Ilala                    | 0.00 | 0.00 | 0.00 | 799816 | 799816 | 799816 |
| TZA | United Republic of Tanzania | 48406 | Karagwe                  | 0.00 | 0.00 | 0.00 | 521464 | 521464 | 521464 |
| TZA | United Republic of Tanzania | 48423 | Nachingwea               | 0.00 | 0.00 | 0.00 | 185452 | 185452 | 185452 |
| TZA | United Republic of Tanzania | 48455 | Ilemela                  | 0.00 | 0.00 | 0.00 | 376656 | 376656 | 376656 |
| TZA | United Republic of Tanzania | 48496 | Sikonge                  | 0.00 | 0.00 | 0.00 | 171482 | 171482 | 171482 |
| TZA | United Republic of Tanzania | 48407 | Muleba                   | 0.00 | 0.00 | 0.00 | 469021 | 469021 | 469021 |
| TZA | United Republic of Tanzania | 48420 | Lindi Rural              | 0.00 | 0.00 | 0.00 | 238734 | 238734 | 238734 |
| TZA | United Republic of Tanzania | 48454 | Geita                    | 0.00 | 0.00 | 0.00 | 835068 | 835068 | 835068 |
| TZA | United Republic of Tanzania | 48384 | Arusha                   | 0.00 | 0.00 | 0.00 | 357694 | 357694 | 357694 |
| TZA | United Republic of Tanzania | 48432 | Musoma Urban             | 0.00 | 0.00 | 0.00 | 169310 | 169310 | 169310 |
| TZA | United Republic of Tanzania | 48391 | Dodoma Rural             | 0.00 | 0.00 | 0.00 | 491633 | 491633 | 491633 |
| TZA | United Republic of Tanzania | 48452 | Newala                   | 0.00 | 0.00 | 0.00 | 185388 | 185388 | 185388 |
| TZA | United Republic of Tanzania | 48439 | Mbeya Rural              | 0.00 | 0.00 | 0.00 | 317328 | 317328 | 317328 |
| TZA | United Republic of Tanzania | 48502 | Korogwe                  | 0.00 | 0.00 | 0.00 | 308176 | 308176 | 308176 |
| TZA | United Republic of Tanzania | 48399 | Ludewa                   | 0.00 | 0.00 | 0.00 | 139836 | 139836 | 139836 |
| TZA | United Republic of Tanzania | 48457 | Magu                     | 0.00 | 0.00 | 0.00 | 495366 | 495366 | 495366 |
| TZA | United Republic of Tanzania | 48468 | Kisarawe                 | 0.00 | 0.00 | 0.00 | 107696 | 107696 | 107696 |
| TZA | United Republic of Tanzania | 48383 | Arumeru                  | 0.00 | 0.00 | 0.00 | 679217 | 679217 | 679217 |
| TZA | United Republic of Tanzania | 48416 | Mwanga                   | 0.00 | 0.00 | 0.00 | 133340 | 133340 | 133340 |
| TZA | United Republic of Tanzania | 48446 | Morogoro Urban           | 0.00 | 0.00 | 0.00 | 318412 | 318412 | 318412 |
| TZA | United Republic of Tanzania | 48470 | Mkuranga                 | 0.00 | 0.00 | 0.00 | 207529 | 207529 | 207529 |
| TZA | United Republic of Tanzania | 48472 | Admin unit not available | 0.00 | 0.00 | 0.00 | 1137   | 1137   | 1137   |
| TZA | United Republic of Tanzania | 48488 | Shinyanga Rural          | 0.00 | 0.00 | 0.00 | 373058 | 373058 | 373058 |
| TZA | United Republic of Tanzania | 48461 | Ukerewe                  | 0.00 | 0.00 | 0.00 | 311937 | 311937 | 311937 |
| TZA | United Republic of Tanzania | 48490 | Iramba                   | 0.00 | 0.00 | 0.00 | 436101 | 436101 | 436101 |
| TZA | United Republic of Tanzania | 48493 | Singida Urban            | 0.00 | 0.00 | 0.00 | 175955 | 175955 | 175955 |
| TZA | United Republic of Tanzania | 48398 | Kilolo                   | 0.00 | 0.00 | 0.00 | 203782 | 203782 | 203782 |
| TZA | United Republic of Tanzania | 48449 | Masasi                   | 0.00 | 0.00 | 0.00 | 513336 | 513336 | 513336 |
| TZA | United Republic of Tanzania | 48477 | Mbinga                   | 0.00 | 0.00 | 0.00 | 478567 | 478567 | 478567 |
| TZA | United Republic of Tanzania | 48484 | Kahama                   | 0.00 | 0.00 | 0.00 | 818445 | 818445 | 818445 |
| TZA | United Republic of Tanzania | 48447 | Mvomero                  | 0.00 | 0.00 | 0.00 | 290381 | 290381 | 290381 |

|     |                             |       |                  |      |      |      |         |         |         |
|-----|-----------------------------|-------|------------------|------|------|------|---------|---------|---------|
| TZA | United Republic of Tanzania | 48498 | Urambo           | 0.00 | 0.00 | 0.00 | 485694  | 485694  | 485694  |
| TZA | United Republic of Tanzania | 48442 | Rungwe           | 0.00 | 0.00 | 0.00 | 380394  | 380394  | 380394  |
| TZA | United Republic of Tanzania | 48483 | Bukombe          | 0.00 | 0.00 | 0.00 | 544446  | 544446  | 544446  |
| TZA | United Republic of Tanzania | 48385 | Karatu           | 0.00 | 0.00 | 0.00 | 450646  | 450646  | 450646  |
| TZA | United Republic of Tanzania | 48404 | Bukoba Rural     | 0.00 | 0.00 | 0.00 | 480694  | 480694  | 480694  |
| TZA | United Republic of Tanzania | 48474 | Nkasi            | 0.00 | 0.00 | 0.00 | 281066  | 281066  | 281066  |
| TZA | United Republic of Tanzania | 48438 | Mbarali          | 0.00 | 0.00 | 0.00 | 295135  | 295135  | 295135  |
| TZA | United Republic of Tanzania | 48430 | Bunda            | 0.00 | 0.00 | 0.00 | 345324  | 345324  | 345324  |
| TZA | United Republic of Tanzania | 48467 | Kibaha           | 0.00 | 0.00 | 0.00 | 169447  | 169447  | 169447  |
| TZA | United Republic of Tanzania | 48393 | Kondoa           | 0.00 | 0.00 | 0.00 | 478635  | 478635  | 478635  |
| TZA | United Republic of Tanzania | 48473 | Mpanda           | 0.00 | 0.00 | 0.00 | 532870  | 532870  | 532870  |
| TZA | United Republic of Tanzania | 48413 | Hai              | 0.00 | 0.00 | 0.00 | 292891  | 292891  | 292891  |
| TZA | United Republic of Tanzania | 48410 | Kibondo          | 0.00 | 0.00 | 0.00 | 413999  | 413999  | 413999  |
| TZA | United Republic of Tanzania | 48506 | Tanga            | 0.00 | 0.00 | 0.00 | 304658  | 304658  | 304658  |
| TZA | United Republic of Tanzania | 48409 | Kasulu           | 0.00 | 0.00 | 0.00 | 634365  | 634365  | 634365  |
| TZA | United Republic of Tanzania | 48478 | Namtumbo         | 0.00 | 0.00 | 0.00 | 205962  | 205962  | 205962  |
| TZA | United Republic of Tanzania | 48396 | Iringa Rural     | 0.00 | 0.00 | 0.00 | 257532  | 257532  | 257532  |
| TZA | United Republic of Tanzania | 48450 | Mtwara Rural     | 0.00 | 0.00 | 0.00 | 214899  | 214899  | 214899  |
| TZA | United Republic of Tanzania | 48458 | Missungwi        | 0.00 | 0.00 | 0.00 | 298651  | 298651  | 298651  |
| TZA | United Republic of Tanzania | 48475 | Sumbawanga Rural | 0.00 | 0.00 | 0.00 | 475918  | 475918  | 475918  |
| TZA | United Republic of Tanzania | 48412 | Kigoma Urban     | 0.00 | 0.00 | 0.00 | 315365  | 315365  | 315365  |
| TZA | United Republic of Tanzania | 48403 | Biharamulo       | 0.00 | 0.00 | 0.00 | 532995  | 532995  | 532995  |
| TZA | United Republic of Tanzania | 48387 | Ngorongoro       | 0.00 | 0.00 | 0.00 | 161680  | 161680  | 161680  |
| TZA | United Republic of Tanzania | 48460 | Sengerema        | 0.00 | 0.00 | 0.00 | 596956  | 596956  | 596956  |
| TZA | United Republic of Tanzania | 48389 | Kinondoni        | 0.00 | 0.00 | 0.00 | 1408577 | 1408577 | 1408577 |
| TZA | United Republic of Tanzania | 48390 | Temeke           | 0.00 | 0.00 | 0.00 | 971995  | 971995  | 971995  |
| TZA | United Republic of Tanzania | 48504 | Muheza           | 0.00 | 0.00 | 0.00 | 321406  | 321406  | 321406  |
| TZA | United Republic of Tanzania | 48445 | Morogoro Rural   | 0.00 | 0.00 | 0.00 | 286837  | 286837  | 286837  |
| TZA | United Republic of Tanzania | 48456 | Kwimba           | 0.00 | 0.00 | 0.00 | 364811  | 364811  | 364811  |
| TZA | United Republic of Tanzania | 48448 | Ulanga           | 0.00 | 0.00 | 0.00 | 220408  | 220408  | 220408  |
| TZA | United Republic of Tanzania | 48426 | Hanang           | 0.00 | 0.00 | 0.00 | 275240  | 275240  | 275240  |
| TZA | United Republic of Tanzania | 48489 | Shinyanga Urban  | 0.00 | 0.00 | 0.00 | 213381  | 213381  | 213381  |
| TZA | United Republic of Tanzania | 48405 | Bukoba Urban     | 0.00 | 0.00 | 0.00 | 155036  | 155036  | 155036  |

|     |                             |       |                   |      |      |      |        |        |        |
|-----|-----------------------------|-------|-------------------|------|------|------|--------|--------|--------|
| TZA | United Republic of Tanzania | 48427 | Kiteto            | 0.00 | 0.00 | 0.00 | 202426 | 202426 | 202426 |
| TZA | United Republic of Tanzania | 48497 | Tabora Urban      | 0.00 | 0.00 | 0.00 | 405273 | 405273 | 405273 |
| TZA | United Republic of Tanzania | 48440 | Mbeya Urban       | 0.00 | 0.00 | 0.00 | 376599 | 376599 | 376599 |
| TZA | United Republic of Tanzania | 48444 | Kilosa            | 0.00 | 0.00 | 0.00 | 584337 | 584337 | 584337 |
| TZA | United Republic of Tanzania | 48392 | Dodoma Urban      | 0.00 | 0.00 | 0.00 | 508113 | 508113 | 508113 |
| TZA | United Republic of Tanzania | 48453 | Tandahimba        | 0.00 | 0.00 | 0.00 | 228810 | 228810 | 228810 |
| TZA | United Republic of Tanzania | 48418 | Same              | 0.00 | 0.00 | 0.00 | 246123 | 246123 | 246123 |
| TZA | United Republic of Tanzania | 48481 | Tunduru           | 0.00 | 0.00 | 0.00 | 288698 | 288698 | 288698 |
| TZA | United Republic of Tanzania | 48479 | Songea Rural      | 0.00 | 0.00 | 0.00 | 187890 | 187890 | 187890 |
| TZA | United Republic of Tanzania | 48428 | Mbulu             | 0.00 | 0.00 | 0.00 | 320473 | 320473 | 320473 |
| TZA | United Republic of Tanzania | 48500 | Handeni           | 0.00 | 0.00 | 0.00 | 281373 | 281373 | 281373 |
| TZA | United Republic of Tanzania | 48414 | Moshi Rural       | 0.00 | 0.00 | 0.00 | 449340 | 449340 | 449340 |
| TZA | United Republic of Tanzania | 48433 | Serengeti         | 0.00 | 0.00 | 0.00 | 225078 | 225078 | 225078 |
| TZA | United Republic of Tanzania | 48471 | Rufiji            | 0.00 | 0.00 | 0.00 | 226298 | 226298 | 226298 |
| TZA | United Republic of Tanzania | 48482 | Bariadi           | 0.00 | 0.00 | 0.00 | 826381 | 826381 | 826381 |
| TZA | United Republic of Tanzania | 48485 | Kishapu           | 0.00 | 0.00 | 0.00 | 323919 | 323919 | 323919 |
| TZA | United Republic of Tanzania | 48466 | Bagamoyo          | 0.00 | 0.00 | 0.00 | 265019 | 265019 | 265019 |
| TZA | United Republic of Tanzania | 48503 | Lushoto           | 0.00 | 0.00 | 0.00 | 480597 | 480597 | 480597 |
| TZA | United Republic of Tanzania | 48495 | Nzega             | 0.00 | 0.00 | 0.00 | 539133 | 539133 | 539133 |
| TZA | United Republic of Tanzania | 48480 | Songea Urban      | 0.00 | 0.00 | 0.00 | 183856 | 183856 | 183856 |
| TZA | United Republic of Tanzania | 48395 | Mpwapwa           | 0.00 | 0.00 | 0.00 | 300727 | 300727 | 300727 |
| TZA | United Republic of Tanzania | 48505 | Pangani           | 0.00 | 0.00 | 0.00 | 48760  | 48760  | 48760  |
| UGA | Uganda                      | 28381 | Adjumani          | 0.00 | 0.00 | 0.00 | 423722 | 423722 | 423722 |
| UGA | Uganda                      | 28382 | Kole              | 0.00 | 0.00 | 0.00 | 175023 | 175023 | 175023 |
| UGA | Uganda                      | 28383 | Kwania            | 0.00 | 0.00 | 0.00 | 124952 | 124952 | 124952 |
| UGA | Uganda                      | 28384 | Maruzi            | 0.00 | 0.00 | 0.00 | 113104 | 113104 | 113104 |
| UGA | Uganda                      | 28385 | Oyam              | 0.00 | 0.00 | 0.00 | 253090 | 253090 | 253090 |
| UGA | Uganda                      | 28386 | Aringa            | 0.00 | 0.00 | 0.00 | 601873 | 601873 | 601873 |
| UGA | Uganda                      | 28387 | Arua Municipality | 0.00 | 0.00 | 0.00 | 44700  | 44700  | 44700  |
| UGA | Uganda                      | 28388 | Ayivu             | 0.00 | 0.00 | 0.00 | 128108 | 128108 | 128108 |
| UGA | Uganda                      | 28389 | Koboko            | 0.00 | 0.00 | 0.00 | 107413 | 107413 | 107413 |
| UGA | Uganda                      | 28390 | Madi-okollo       | 0.00 | 0.00 | 0.00 | 71223  | 71223  | 71223  |
| UGA | Uganda                      | 28391 | Maracha           | 0.00 | 0.00 | 0.00 | 108724 | 108724 | 108724 |

|     |        |       |                          |      |      |      |        |        |        |
|-----|--------|-------|--------------------------|------|------|------|--------|--------|--------|
| UGA | Uganda | 28392 | Terego                   | 0.00 | 0.00 | 0.00 | 127788 | 127788 | 127788 |
| UGA | Uganda | 28393 | Vurra                    | 0.00 | 0.00 | 0.00 | 71541  | 71541  | 71541  |
| UGA | Uganda | 28394 | Bukooli                  | 0.00 | 0.00 | 0.00 | 744227 | 744227 | 744227 |
| UGA | Uganda | 28395 | Bwamba                   | 0.00 | 0.00 | 0.00 | 287691 | 287691 | 287691 |
| UGA | Uganda | 28396 | Ntoroko                  | 0.00 | 0.00 | 0.00 | 104241 | 104241 | 104241 |
| UGA | Uganda | 28397 | Buhweju                  | 0.00 | 0.00 | 0.00 | 117163 | 117163 | 117163 |
| UGA | Uganda | 28398 | Bunyaruguru              | 0.00 | 0.00 | 0.00 | 139786 | 139786 | 139786 |
| UGA | Uganda | 28399 | Igara                    | 0.00 | 0.00 | 0.00 | 298417 | 298417 | 298417 |
| UGA | Uganda | 28400 | Ruhinda                  | 0.00 | 0.00 | 0.00 | 227491 | 227491 | 227491 |
| UGA | Uganda | 28401 | Sheema                   | 0.00 | 0.00 | 0.00 | 255994 | 255994 | 255994 |
| UGA | Uganda | 28402 | Samia-bugwe              | 0.00 | 0.00 | 0.00 | 412502 | 412502 | 412502 |
| UGA | Uganda | 28403 | Aswa                     | 0.00 | 0.00 | 0.00 | 95180  | 95180  | 95180  |
| UGA | Uganda | 28404 | Gulu Municipality        | 0.00 | 0.00 | 0.00 | 87052  | 87052  | 87052  |
| UGA | Uganda | 28405 | Kilak                    | 0.00 | 0.00 | 0.00 | 126080 | 126080 | 126080 |
| UGA | Uganda | 28406 | Nwoya                    | 0.00 | 0.00 | 0.00 | 39893  | 39893  | 39893  |
| UGA | Uganda | 28407 | Omoro                    | 0.00 | 0.00 | 0.00 | 119891 | 119891 | 119891 |
| UGA | Uganda | 28408 | Bugahya                  | 0.00 | 0.00 | 0.00 | 354691 | 354691 | 354691 |
| UGA | Uganda | 28409 | Buhaguzi                 | 0.00 | 0.00 | 0.00 | 268773 | 268773 | 268773 |
| UGA | Uganda | 28410 | Bugweri                  | 0.00 | 0.00 | 0.00 | 148680 | 148680 | 148680 |
| UGA | Uganda | 28411 | Bunya                    | 0.00 | 0.00 | 0.00 | 517973 | 517973 | 517973 |
| UGA | Uganda | 28412 | Busiki                   | 0.00 | 0.00 | 0.00 | 205955 | 205955 | 205955 |
| UGA | Uganda | 28413 | Kigulu                   | 0.00 | 0.00 | 0.00 | 311011 | 311011 | 311011 |
| UGA | Uganda | 28414 | Luuka                    | 0.00 | 0.00 | 0.00 | 227166 | 227166 | 227166 |
| UGA | Uganda | 28415 | Butembe                  | 0.00 | 0.00 | 0.00 | 233274 | 233274 | 233274 |
| UGA | Uganda | 28416 | Jinja Municipality       | 0.00 | 0.00 | 0.00 | 121006 | 121006 | 121006 |
| UGA | Uganda | 28417 | Kagoma                   | 0.00 | 0.00 | 0.00 | 254160 | 254160 | 254160 |
| UGA | Uganda | 28419 | Ndorwa                   | 0.00 | 0.00 | 0.00 | 185951 | 185951 | 185951 |
| UGA | Uganda | 28420 | Rubanda                  | 0.00 | 0.00 | 0.00 | 220647 | 220647 | 220647 |
| UGA | Uganda | 28421 | Rukiga                   | 0.00 | 0.00 | 0.00 | 117037 | 117037 | 117037 |
| UGA | Uganda | 28422 | Bunyangabu               | 0.00 | 0.00 | 0.00 | 169905 | 169905 | 169905 |
| UGA | Uganda | 28423 | Burahya                  | 0.00 | 0.00 | 0.00 | 257936 | 257936 | 257936 |
| UGA | Uganda | 28424 | Fort Portal Municipality | 0.00 | 0.00 | 0.00 | 62414  | 62414  | 62414  |
| UGA | Uganda | 28425 | Kibale                   | 0.00 | 0.00 | 0.00 | 225951 | 225951 | 225951 |

|     |        |       |                   |      |      |      |        |        |        |
|-----|--------|-------|-------------------|------|------|------|--------|--------|--------|
| UGA | Uganda | 28426 | Kitagwenda        | 0.00 | 0.00 | 0.00 | 154433 | 154433 | 154433 |
| UGA | Uganda | 28427 | Kyaka             | 0.00 | 0.00 | 0.00 | 181896 | 181896 | 181896 |
| UGA | Uganda | 28428 | Mwenge            | 0.00 | 0.00 | 0.00 | 437406 | 437406 | 437406 |
| UGA | Uganda | 28429 | Bujumba           | 0.00 | 0.00 | 0.00 | 37365  | 37365  | 37365  |
| UGA | Uganda | 28430 | Kyamuswa          | 0.00 | 0.00 | 0.00 | 36382  | 36382  | 36382  |
| UGA | Uganda | 28432 | Budiope           | 0.00 | 0.00 | 0.00 | 237433 | 237433 | 237433 |
| UGA | Uganda | 28433 | Bugabula          | 0.00 | 0.00 | 0.00 | 287614 | 287614 | 287614 |
| UGA | Uganda | 28434 | Bulamogi          | 0.00 | 0.00 | 0.00 | 192701 | 192701 | 192701 |
| UGA | Uganda | 28435 | Buzaaya           | 0.00 | 0.00 | 0.00 | 163260 | 163260 | 163260 |
| UGA | Uganda | 28441 | Amuria            | 0.00 | 0.00 | 0.00 | 79553  | 79553  | 79553  |
| UGA | Uganda | 28442 | Kapelebyong       | 0.00 | 0.00 | 0.00 | 42924  | 42924  | 42924  |
| UGA | Uganda | 28443 | Usuk              | 0.00 | 0.00 | 0.00 | 82562  | 82562  | 82562  |
| UGA | Uganda | 28444 | Bugangaizi        | 0.00 | 0.00 | 0.00 | 203795 | 203795 | 203795 |
| UGA | Uganda | 28445 | Buyaga            | 0.00 | 0.00 | 0.00 | 432721 | 432721 | 432721 |
| UGA | Uganda | 28446 | Buyanja           | 0.00 | 0.00 | 0.00 | 130447 | 130447 | 130447 |
| UGA | Uganda | 28447 | Kiboga            | 0.00 | 0.00 | 0.00 | 397530 | 397530 | 397530 |
| UGA | Uganda | 28448 | Bufumbira         | 0.00 | 0.00 | 0.00 | 271245 | 271245 | 271245 |
| UGA | Uganda | 28449 | Agago             | 0.52 | 0.52 | 0.52 | 120505 | 120505 | 120505 |
| UGA | Uganda | 28450 | Aruu              | 0.52 | 0.52 | 0.52 | 91203  | 91203  | 91203  |
| UGA | Uganda | 28451 | Chua              | 0.52 | 0.52 | 0.52 | 100912 | 100912 | 100912 |
| UGA | Uganda | 28452 | Lamwo             | 0.52 | 0.52 | 0.52 | 71076  | 71076  | 71076  |
| UGA | Uganda | 28453 | Dodoth            | 0.00 | 0.00 | 0.00 | 170013 | 170013 | 170013 |
| UGA | Uganda | 28454 | Jie               | 0.00 | 0.00 | 0.00 | 65749  | 65749  | 65749  |
| UGA | Uganda | 28455 | Labwor            | 0.52 | 0.52 | 0.52 | 8523   | 8523   | 8523   |
| UGA | Uganda | 28456 | Bukedea           | 0.00 | 0.00 | 0.00 | 147069 | 147069 | 147069 |
| UGA | Uganda | 28457 | Kumi              | 0.00 | 0.00 | 0.00 | 201972 | 201972 | 201972 |
| UGA | Uganda | 28458 | Ngora             | 0.00 | 0.00 | 0.00 | 123793 | 123793 | 123793 |
| UGA | Uganda | 28459 | Dokolo            | 0.00 | 0.00 | 0.00 | 152438 | 152438 | 152438 |
| UGA | Uganda | 28460 | Erute             | 0.00 | 0.00 | 0.00 | 237869 | 237869 | 237869 |
| UGA | Uganda | 28461 | Kyoga             | 0.00 | 0.00 | 0.00 | 98096  | 98096  | 98096  |
| UGA | Uganda | 28462 | Lira Municipality | 0.00 | 0.00 | 0.00 | 88723  | 88723  | 88723  |
| UGA | Uganda | 28463 | Moroto            | 0.00 | 0.00 | 0.00 | 187313 | 187313 | 187313 |
| UGA | Uganda | 28464 | Otuke             | 0.00 | 0.00 | 0.00 | 61468  | 61468  | 61468  |

|     |        |       |                       |      |      |      |        |        |        |
|-----|--------|-------|-----------------------|------|------|------|--------|--------|--------|
| UGA | Uganda | 28465 | Katikamu              | 0.00 | 0.00 | 0.00 | 231658 | 231658 | 231658 |
| UGA | Uganda | 28466 | Nakaseke              | 0.00 | 0.00 | 0.00 | 142500 | 142500 | 142500 |
| UGA | Uganda | 28467 | Wabusana (bamunanika) | 0.00 | 0.00 | 0.00 | 143270 | 143270 | 143270 |
| UGA | Uganda | 28468 | Bukomansimbi          | 0.00 | 0.00 | 0.00 | 176526 | 176526 | 176526 |
| UGA | Uganda | 28469 | Bukoto                | 0.00 | 0.00 | 0.00 | 518896 | 518896 | 518896 |
| UGA | Uganda | 28470 | Kalungu               | 0.00 | 0.00 | 0.00 | 204505 | 204505 | 204505 |
| UGA | Uganda | 28471 | Masaka Municipality   | 0.00 | 0.00 | 0.00 | 115576 | 115576 | 115576 |
| UGA | Uganda | 28472 | Bujenje               | 0.00 | 0.00 | 0.00 | 127662 | 127662 | 127662 |
| UGA | Uganda | 28473 | Buliisa               | 0.00 | 0.00 | 0.00 | 108123 | 108123 | 108123 |
| UGA | Uganda | 28475 | Kibanda               | 0.00 | 0.00 | 0.00 | 306123 | 306123 | 306123 |
| UGA | Uganda | 28476 | Bubulo                | 0.00 | 0.00 | 0.00 | 178409 | 178409 | 178409 |
| UGA | Uganda | 28477 | Budadiri              | 0.00 | 0.00 | 0.00 | 276281 | 276281 | 276281 |
| UGA | Uganda | 28478 | Bulambuli             | 0.00 | 0.00 | 0.00 | 147551 | 147551 | 147551 |
| UGA | Uganda | 28479 | Bungokho              | 0.00 | 0.00 | 0.00 | 191988 | 191988 | 191988 |
| UGA | Uganda | 28480 | Manjiya               | 0.00 | 0.00 | 0.00 | 85695  | 85695  | 85695  |
| UGA | Uganda | 28481 | Mbale Municipality    | 0.00 | 0.00 | 0.00 | 59792  | 59792  | 59792  |
| UGA | Uganda | 28482 | Bukanga               | 0.00 | 0.00 | 0.00 | 49955  | 49955  | 49955  |
| UGA | Uganda | 28483 | Ibanda                | 0.00 | 0.00 | 0.00 | 94510  | 94510  | 94510  |
| UGA | Uganda | 28484 | Isingiro              | 0.00 | 0.00 | 0.00 | 100699 | 100699 | 100699 |
| UGA | Uganda | 28485 | Kashari               | 0.00 | 0.00 | 0.00 | 81159  | 81159  | 81159  |
| UGA | Uganda | 28486 | Kazo                  | 0.00 | 0.00 | 0.00 | 48759  | 48759  | 48759  |
| UGA | Uganda | 28488 | Nyabushozi            | 0.00 | 0.00 | 0.00 | 48908  | 48908  | 48908  |
| UGA | Uganda | 28489 | Rwampara              | 0.00 | 0.00 | 0.00 | 65964  | 65964  | 65964  |
| UGA | Uganda | 28490 | Bokora                | 0.00 | 0.00 | 0.00 | 215804 | 215804 | 215804 |
| UGA | Uganda | 28491 | Kadani (chekwii)      | 0.00 | 0.00 | 0.00 | 101753 | 101753 | 101753 |
| UGA | Uganda | 28492 | Matheniko             | 0.00 | 0.00 | 0.00 | 146842 | 146842 | 146842 |
| UGA | Uganda | 28493 | Moroto Municipality   | 0.00 | 0.00 | 0.00 | 10795  | 10795  | 10795  |
| UGA | Uganda | 28494 | Pian                  | 0.00 | 0.00 | 0.00 | 81684  | 81684  | 81684  |
| UGA | Uganda | 28495 | Upe                   | 0.00 | 0.00 | 0.00 | 126960 | 126960 | 126960 |
| UGA | Uganda | 28496 | Obongi                | 0.00 | 0.00 | 0.00 | 205282 | 205282 | 205282 |
| UGA | Uganda | 28497 | West Moyo             | 0.00 | 0.00 | 0.00 | 248424 | 248424 | 248424 |
| UGA | Uganda | 28499 | Butambala             | 0.00 | 0.00 | 0.00 | 114142 | 114142 | 114142 |
| UGA | Uganda | 28501 | Gomba                 | 0.00 | 0.00 | 0.00 | 177705 | 177705 | 177705 |



|     |        |       |                |      |      |      |        |        |        |
|-----|--------|-------|----------------|------|------|------|--------|--------|--------|
| UGA | Uganda | 28503 | Mawokota       | 0.00 | 0.00 | 0.00 | 254451 | 254451 | 254451 |
| UGA | Uganda | 28504 | Busujju        | 0.00 | 0.00 | 0.00 | 77780  | 77780  | 77780  |
| UGA | Uganda | 28505 | Buwekula       | 0.00 | 0.00 | 0.00 | 230459 | 230459 | 230459 |
| UGA | Uganda | 28506 | Kassanda       | 0.00 | 0.00 | 0.00 | 196973 | 196973 | 196973 |
| UGA | Uganda | 28507 | Mityana        | 0.00 | 0.00 | 0.00 | 203148 | 203148 | 203148 |
| UGA | Uganda | 28508 | Bbaale         | 0.00 | 0.00 | 0.00 | 154078 | 154078 | 154078 |
| UGA | Uganda | 28509 | Buvuma Islands | 0.00 | 0.00 | 0.00 | 62459  | 62459  | 62459  |
| UGA | Uganda | 28510 | Buyikwe        | 0.00 | 0.00 | 0.00 | 510224 | 510224 | 510224 |
| UGA | Uganda | 28511 | Mukono         | 0.00 | 0.00 | 0.00 | 416591 | 416591 | 416591 |
| UGA | Uganda | 28512 | Nakifuma       | 0.00 | 0.00 | 0.00 | 241985 | 241985 | 241985 |
| UGA | Uganda | 28513 | Ntenjeru       | 0.00 | 0.00 | 0.00 | 263313 | 263313 | 263313 |
| UGA | Uganda | 28514 | Jonam          | 0.00 | 0.00 | 0.00 | 147981 | 147981 | 147981 |
| UGA | Uganda | 28515 | Okoro          | 0.00 | 0.00 | 0.00 | 258096 | 258096 | 258096 |
| UGA | Uganda | 28516 | Padyere        | 0.00 | 0.00 | 0.00 | 240861 | 240861 | 240861 |
| UGA | Uganda | 28517 | Kajara         | 0.00 | 0.00 | 0.00 | 138314 | 138314 | 138314 |
| UGA | Uganda | 28518 | Ruhaama        | 0.00 | 0.00 | 0.00 | 281667 | 281667 | 281667 |
| UGA | Uganda | 28519 | Rushenyi       | 0.00 | 0.00 | 0.00 | 139040 | 139040 | 139040 |
| UGA | Uganda | 28520 | Budaka         | 0.00 | 0.00 | 0.00 | 162605 | 162605 | 162605 |
| UGA | Uganda | 28521 | Butebo         | 0.00 | 0.00 | 0.00 | 114399 | 114399 | 114399 |
| UGA | Uganda | 28522 | Kibuku         | 0.00 | 0.00 | 0.00 | 151773 | 151773 | 151773 |
| UGA | Uganda | 28523 | Pallisa        | 0.00 | 0.00 | 0.00 | 195201 | 195201 | 195201 |
| UGA | Uganda | 28524 | Kabula         | 0.00 | 0.00 | 0.00 | 82364  | 82364  | 82364  |
| UGA | Uganda | 28525 | Kakuuto        | 0.00 | 0.00 | 0.00 | 104689 | 104689 | 104689 |
| UGA | Uganda | 28526 | Kooki          | 0.00 | 0.00 | 0.00 | 203045 | 203045 | 203045 |
| UGA | Uganda | 28527 | Kyotera        | 0.00 | 0.00 | 0.00 | 171290 | 171290 | 171290 |
| UGA | Uganda | 28528 | Kinkiizi       | 0.00 | 0.00 | 0.00 | 291424 | 291424 | 291424 |
| UGA | Uganda | 28529 | Rubabo         | 0.00 | 0.00 | 0.00 | 161024 | 161024 | 161024 |
| UGA | Uganda | 28530 | Rujumbura      | 0.00 | 0.00 | 0.00 | 215432 | 215432 | 215432 |
| UGA | Uganda | 28531 | Lwemiyaga      | 0.00 | 0.00 | 0.00 | 43683  | 43683  | 43683  |
| UGA | Uganda | 28532 | Mawogola       | 0.00 | 0.00 | 0.00 | 211147 | 211147 | 211147 |
| UGA | Uganda | 28533 | Kaberaimaido   | 0.00 | 0.00 | 0.00 | 107693 | 107693 | 107693 |
| UGA | Uganda | 28534 | Kalaki         | 0.00 | 0.00 | 0.00 | 119425 | 119425 | 119425 |
| UGA | Uganda | 28535 | Kasilo         | 0.00 | 0.00 | 0.00 | 130735 | 130735 | 130735 |

|     |           |       |                      |      |      |      |         |         |         |
|-----|-----------|-------|----------------------|------|------|------|---------|---------|---------|
| UGA | Uganda    | 28536 | Serere               | 0.00 | 0.00 | 0.00 | 193533  | 193533  | 193533  |
| UGA | Uganda    | 28537 | Soroti               | 0.00 | 0.00 | 0.00 | 291723  | 291723  | 291723  |
| UGA | Uganda    | 28538 | Soroti Municipality  | 0.00 | 0.00 | 0.00 | 78772   | 78772   | 78772   |
| UGA | Uganda    | 28539 | Bunyole              | 0.00 | 0.00 | 0.00 | 161258  | 161258  | 161258  |
| UGA | Uganda    | 28540 | Kisoko (west Budama) | 0.00 | 0.00 | 0.00 | 216997  | 216997  | 216997  |
| UGA | Uganda    | 28541 | Tororo               | 0.00 | 0.00 | 0.00 | 147748  | 147748  | 147748  |
| UGA | Uganda    | 28542 | Tororo Municipality  | 0.00 | 0.00 | 0.00 | 45370   | 45370   | 45370   |
| UGA | Uganda    | 42202 | Central Kampala      | 0.00 | 0.00 | 0.00 | 192352  | 192352  | 192352  |
| UGA | Uganda    | 42203 | Kongasis             | 0.00 | 0.00 | 0.00 | 55108   | 55108   | 55108   |
| UGA | Uganda    | 42204 | Kween                | 0.00 | 0.00 | 0.00 | 98761   | 98761   | 98761   |
| UGA | Uganda    | 42205 | Tingey               | 0.00 | 0.00 | 0.00 | 98264   | 98264   | 98264   |
| UGA | Uganda    | 42206 | Bukonjo              | 0.00 | 0.00 | 0.00 | 401863  | 401863  | 401863  |
| UGA | Uganda    | 42207 | Busongora            | 0.00 | 0.00 | 0.00 | 455026  | 455026  | 455026  |
| UGA | Uganda    | 42208 | Buruli M             | 0.00 | 0.00 | 0.00 | 218318  | 218318  | 218318  |
| UGA | Uganda    | 42209 | Buruli               | 0.00 | 0.00 | 0.00 | 182240  | 182240  | 182240  |
| UGA | Uganda    | 42210 | Busiro               | 0.00 | 0.00 | 0.00 | 606952  | 606952  | 606952  |
| UGA | Uganda    | 42211 | Entebbe Municipality | 0.00 | 0.00 | 0.00 | 112227  | 112227  | 112227  |
| UGA | Uganda    | 42212 | Kyadondo             | 0.00 | 0.00 | 0.00 | 1520993 | 1520993 | 1520993 |
| UGA | Uganda    | 42213 | Kawempe              | 0.00 | 0.00 | 0.00 | 492375  | 492375  | 492375  |
| UGA | Uganda    | 42214 | Makerere University  | 0.00 | 0.00 | 0.00 | 21783   | 21783   | 21783   |
| UGA | Uganda    | 42215 | Nakawa               | 0.00 | 0.00 | 0.00 | 455481  | 455481  | 455481  |
| UGA | Uganda    | 42216 | Rubaga               | 0.00 | 0.00 | 0.00 | 510336  | 510336  | 510336  |
| VEN | Venezuela | 31856 | D. Atabapo           | 0.89 | 0.91 | 0.92 | 0       | 0       | 0       |
| VEN | Venezuela | 31857 | D. Atures            | 0.89 | 0.91 | 0.92 | 0       | 0       | 0       |
| VEN | Venezuela | 31858 | D. Casiquiare        | 0.89 | 0.91 | 0.92 | 0       | 0       | 0       |
| VEN | Venezuela | 31859 | D. Rio Negro         | 0.89 | 0.91 | 0.92 | 0       | 0       | 0       |
| VEN | Venezuela | 31860 | Anaco                | 0.41 | 0.46 | 0.49 | 49299   | 42767   | 38824   |
| VEN | Venezuela | 31861 | Aragua               | 0.41 | 0.46 | 0.49 | 19877   | 17243   | 15654   |
| VEN | Venezuela | 31862 | Bolivar              | 0.41 | 0.46 | 0.49 | 184732  | 160255  | 145481  |
| VEN | Venezuela | 31863 | Bruzual              | 0.41 | 0.46 | 0.49 | 13506   | 11717   | 10637   |
| VEN | Venezuela | 31864 | Cajigal              | 0.41 | 0.46 | 0.49 | 5559    | 4823    | 4378    |
| VEN | Venezuela | 31865 | Carvajal             | 0.41 | 0.46 | 0.49 | 5963    | 5173    | 4696    |
| VEN | Venezuela | 31866 | Freites              | 0.41 | 0.46 | 0.49 | 31548   | 27368   | 24845   |

|     |           |       |                          |      |      |      |        |        |        |
|-----|-----------|-------|--------------------------|------|------|------|--------|--------|--------|
| VEN | Venezuela | 31867 | Guanipa                  | 0.41 | 0.46 | 0.49 | 31491  | 27319  | 24800  |
| VEN | Venezuela | 31868 | Guanta                   | 0.41 | 0.46 | 0.49 | 13216  | 11465  | 10408  |
| VEN | Venezuela | 31869 | I. De Adentro            | 0.41 | 0.46 | 0.49 | 40     | 34     | 31     |
| VEN | Venezuela | 31870 | Independencia            | 0.41 | 0.46 | 0.49 | 29389  | 25495  | 23145  |
| VEN | Venezuela | 31871 | Isla                     | 0.41 | 0.46 | 0.49 | 130    | 113    | 103    |
| VEN | Venezuela | 31872 | Libertad                 | 0.41 | 0.46 | 0.49 | 7254   | 6293   | 5713   |
| VEN | Venezuela | 31873 | Miranda                  | 0.41 | 0.46 | 0.49 | 18508  | 16056  | 14576  |
| VEN | Venezuela | 31874 | Monagas                  | 0.41 | 0.46 | 0.49 | 7235   | 6276   | 5698   |
| VEN | Venezuela | 31875 | Penalver                 | 0.41 | 0.46 | 0.49 | 17976  | 15594  | 14156  |
| VEN | Venezuela | 31876 | Piritu                   | 0.41 | 0.46 | 0.49 | 9457   | 8204   | 7447   |
| VEN | Venezuela | 31877 | Simon Rodriguez          | 0.41 | 0.46 | 0.49 | 73336  | 63619  | 57754  |
| VEN | Venezuela | 31878 | Sotillo                  | 0.41 | 0.46 | 0.49 | 94610  | 82074  | 74507  |
| VEN | Venezuela | 31879 | Autonomo Achaguas        | 0.41 | 0.46 | 0.49 | 23625  | 20494  | 18605  |
| VEN | Venezuela | 31880 | Autonomo Biruaca         | 0.41 | 0.46 | 0.49 | 22448  | 19474  | 17678  |
| VEN | Venezuela | 31881 | Autonomo Munoz           | 0.41 | 0.46 | 0.49 | 10717  | 9297   | 8440   |
| VEN | Venezuela | 31882 | Autonomo Paez            | 0.38 | 0.72 | 0.92 | 43211  | 7765   | 0      |
| VEN | Venezuela | 31883 | Autonomo Pedro Camejo    | 0.41 | 0.46 | 0.49 | 12405  | 10761  | 9769   |
| VEN | Venezuela | 31884 | Autonomo Romulo Gallegos | 0.41 | 0.46 | 0.49 | 10962  | 9510   | 8633   |
| VEN | Venezuela | 31885 | Autonomo San Fernando    | 0.41 | 0.46 | 0.49 | 68339  | 59284  | 53818  |
| VEN | Venezuela | 31886 | Bolivar                  | 0.41 | 0.46 | 0.49 | 14001  | 12146  | 11026  |
| VEN | Venezuela | 31887 | Camatagua                | 0.41 | 0.46 | 0.49 | 6752   | 5858   | 5318   |
| VEN | Venezuela | 31888 | Girardot                 | 0.41 | 0.46 | 0.49 | 153967 | 133567 | 121253 |
| VEN | Venezuela | 31889 | Jose Angel Lamas         | 0.41 | 0.46 | 0.49 | 12914  | 11203  | 10170  |
| VEN | Venezuela | 31890 | Jose Felix Ribas         | 0.41 | 0.46 | 0.49 | 75850  | 65800  | 59734  |
| VEN | Venezuela | 31891 | Libertador               | 0.41 | 0.46 | 0.49 | 16692  | 14481  | 13146  |
| VEN | Venezuela | 31892 | Mario Briceno Iragorry   | 0.41 | 0.46 | 0.49 | 46319  | 40182  | 36478  |
| VEN | Venezuela | 31893 | San Casimiro             | 0.41 | 0.46 | 0.49 | 10840  | 9404   | 8537   |
| VEN | Venezuela | 31894 | San Sebastian            | 0.41 | 0.46 | 0.49 | 10134  | 8791   | 7980   |
| VEN | Venezuela | 31895 | Santiago Marino          | 0.41 | 0.46 | 0.49 | 134635 | 116796 | 106029 |
| VEN | Venezuela | 31896 | Santos Michelena         | 0.41 | 0.46 | 0.49 | 15344  | 13311  | 12084  |
| VEN | Venezuela | 31897 | Sucre                    | 0.41 | 0.46 | 0.49 | 43054  | 37350  | 33906  |
| VEN | Venezuela | 31898 | Tovar                    | 0.41 | 0.46 | 0.49 | 7215   | 6259   | 5682   |
| VEN | Venezuela | 31899 | Urdaneta                 | 0.41 | 0.46 | 0.49 | 8748   | 7589   | 6889   |

|     |           |       |                          |      |      |      |        |        |        |
|-----|-----------|-------|--------------------------|------|------|------|--------|--------|--------|
| VEN | Venezuela | 31900 | Zamora                   | 0.41 | 0.46 | 0.49 | 59366  | 51500  | 46752  |
| VEN | Venezuela | 31901 | Alberto Arvelo Torrealba | 0.41 | 0.46 | 0.49 | 16803  | 14576  | 13233  |
| VEN | Venezuela | 31902 | Antonio Jose De Sucre    | 0.41 | 0.46 | 0.49 | 34545  | 29968  | 27205  |
| VEN | Venezuela | 31903 | Arismendi                | 0.41 | 0.46 | 0.49 | 10184  | 8834   | 8020   |
| VEN | Venezuela | 31904 | Barinas                  | 0.41 | 0.46 | 0.49 | 150036 | 130157 | 118157 |
| VEN | Venezuela | 31905 | Bolivar                  | 0.38 | 0.72 | 0.92 | 24103  | 4331   | 0      |
| VEN | Venezuela | 31906 | Cruz Paredes             | 0.41 | 0.46 | 0.49 | 11165  | 9686   | 8793   |
| VEN | Venezuela | 31907 | Ezequiel Zamora          | 0.41 | 0.46 | 0.49 | 29200  | 25331  | 22996  |
| VEN | Venezuela | 31908 | Obispos                  | 0.41 | 0.46 | 0.49 | 17267  | 14980  | 13599  |
| VEN | Venezuela | 31909 | Pedraza                  | 0.41 | 0.46 | 0.49 | 28604  | 24814  | 22527  |
| VEN | Venezuela | 31910 | Rojas                    | 0.41 | 0.46 | 0.49 | 16457  | 14277  | 12961  |
| VEN | Venezuela | 31911 | Sosa                     | 0.41 | 0.46 | 0.49 | 9940   | 8623   | 7828   |
| VEN | Venezuela | 31912 | Caroni                   | 0.41 | 0.46 | 0.49 | 253106 | 219570 | 199327 |
| VEN | Venezuela | 31913 | Cedeno                   | 0.41 | 0.46 | 0.49 | 28956  | 25120  | 22804  |
| VEN | Venezuela | 31914 | El Callao                | 0.41 | 0.46 | 0.49 | 8919   | 7737   | 7024   |
| VEN | Venezuela | 31915 | Gran Sabana              | 0.41 | 0.46 | 0.49 | 17022  | 14766  | 13405  |
| VEN | Venezuela | 31916 | Heres                    | 0.41 | 0.46 | 0.49 | 138861 | 120462 | 109356 |
| VEN | Venezuela | 31917 | Piar                     | 0.41 | 0.46 | 0.49 | 47196  | 40943  | 37168  |
| VEN | Venezuela | 31918 | Raul Leoni               | 0.41 | 0.46 | 0.49 | 18512  | 16059  | 14579  |
| VEN | Venezuela | 31919 | Roscio                   | 0.41 | 0.46 | 0.49 | 8882   | 7705   | 6995   |
| VEN | Venezuela | 31920 | Sifontes                 | 0.41 | 0.46 | 0.49 | 23940  | 20768  | 18854  |
| VEN | Venezuela | 31921 | Sucre                    | 0.41 | 0.46 | 0.49 | 9383   | 8139   | 7389   |
| VEN | Venezuela | 31922 | Bejuma                   | 0.41 | 0.46 | 0.49 | 21752  | 18870  | 17130  |
| VEN | Venezuela | 31923 | Carlos Arevalo           | 0.41 | 0.46 | 0.49 | 64369  | 55841  | 50693  |
| VEN | Venezuela | 31924 | Diego Ibarra             | 0.41 | 0.46 | 0.49 | 40332  | 34988  | 31763  |
| VEN | Venezuela | 31925 | Guacara                  | 0.41 | 0.46 | 0.49 | 72170  | 62608  | 56836  |
| VEN | Venezuela | 31926 | Isla                     | 0.41 | 0.46 | 0.49 | 68     | 59     | 54     |
| VEN | Venezuela | 31927 | Juan Jose Mora           | 0.41 | 0.46 | 0.49 | 28410  | 24645  | 22373  |
| VEN | Venezuela | 31928 | Lago De Valencia         | 0.41 | 0.46 | 0.49 | 2678   | 2323   | 2109   |
| VEN | Venezuela | 31929 | Miranda                  | 0.41 | 0.46 | 0.49 | 11888  | 10313  | 9362   |
| VEN | Venezuela | 31930 | Montalban                | 0.41 | 0.46 | 0.49 | 73646  | 63888  | 57998  |
| VEN | Venezuela | 31931 | Puerto Cabello           | 0.41 | 0.46 | 0.49 | 70433  | 61101  | 55468  |
| VEN | Venezuela | 31932 | San Joaquin              | 0.41 | 0.46 | 0.49 | 27693  | 24024  | 21809  |

|     |           |       |                          |      |      |      |         |         |         |
|-----|-----------|-------|--------------------------|------|------|------|---------|---------|---------|
| VEN | Venezuela | 31933 | Valencia                 | 0.41 | 0.46 | 0.49 | 510229  | 442624  | 401818  |
| VEN | Venezuela | 31934 | Anzoategui               | 0.41 | 0.46 | 0.49 | 7731    | 6707    | 6089    |
| VEN | Venezuela | 31935 | Falcon                   | 0.41 | 0.46 | 0.49 | 42101   | 36523   | 33156   |
| VEN | Venezuela | 31936 | Girardot                 | 0.41 | 0.46 | 0.49 | 4930    | 4277    | 3882    |
| VEN | Venezuela | 31937 | Pao De San Juan Bautista | 0.41 | 0.46 | 0.49 | 9773    | 8478    | 7696    |
| VEN | Venezuela | 31938 | Ricaurte                 | 0.41 | 0.46 | 0.49 | 5593    | 4852    | 4405    |
| VEN | Venezuela | 31939 | San Carlos               | 0.41 | 0.46 | 0.49 | 52246   | 45323   | 41145   |
| VEN | Venezuela | 31940 | Tinaco                   | 0.41 | 0.46 | 0.49 | 17549   | 15224   | 13820   |
| VEN | Venezuela | 31941 | D. Antonio Diaz          | 0.41 | 0.46 | 0.49 | 27044   | 23461   | 21298   |
| VEN | Venezuela | 31942 | D. Pedernales            | 0.41 | 0.46 | 0.49 | 3868    | 3356    | 3046    |
| VEN | Venezuela | 31943 | Tucupita                 | 0.41 | 0.46 | 0.49 | 57991   | 50307   | 45669   |
| VEN | Venezuela | 31959 | Libertador               | 0.41 | 0.46 | 0.49 | 2000773 | 1735674 | 1575659 |
| VEN | Venezuela | 31960 | Vargas                   | 0.41 | 0.46 | 0.49 | 183448  | 159141  | 144470  |
| VEN | Venezuela | 31961 | Acosta                   | 0.21 | 0.21 | 0.21 | 11197   | 11197   | 11197   |
| VEN | Venezuela | 31962 | Bolivar                  | 0.21 | 0.21 | 0.21 | 8507    | 8507    | 8507    |
| VEN | Venezuela | 31963 | Buchivacoa               | 0.21 | 0.21 | 0.21 | 13925   | 13925   | 13925   |
| VEN | Venezuela | 31964 | Cacique Manauere         | 0.21 | 0.21 | 0.21 | 6873    | 6873    | 6873    |
| VEN | Venezuela | 31965 | Carirubana               | 0.21 | 0.21 | 0.21 | 138641  | 138641  | 138641  |
| VEN | Venezuela | 31966 | Colina                   | 0.21 | 0.21 | 0.21 | 25649   | 25649   | 25649   |
| VEN | Venezuela | 31967 | Dabajuro                 | 0.21 | 0.21 | 0.21 | 14707   | 14707   | 14707   |
| VEN | Venezuela | 31968 | Democracia               | 0.21 | 0.21 | 0.21 | 11659   | 11659   | 11659   |
| VEN | Venezuela | 31969 | Falcon                   | 0.21 | 0.21 | 0.21 | 29642   | 29642   | 29642   |
| VEN | Venezuela | 31970 | Federacion               | 0.21 | 0.21 | 0.21 | 17208   | 17208   | 17208   |
| VEN | Venezuela | 31972 | Jacura                   | 0.21 | 0.21 | 0.21 | 6569    | 6569    | 6569    |
| VEN | Venezuela | 31973 | Los Tanques              | 0.21 | 0.21 | 0.21 | 26543   | 26543   | 26543   |
| VEN | Venezuela | 31974 | Mauroa                   | 0.41 | 0.46 | 0.49 | 10379   | 9004    | 8174    |
| VEN | Venezuela | 31975 | Miranda                  | 0.21 | 0.21 | 0.21 | 127917  | 127917  | 127917  |
| VEN | Venezuela | 31976 | Monsenor Iturriza        | 0.41 | 0.46 | 0.49 | 7631    | 6620    | 6010    |
| VEN | Venezuela | 31977 | Palma Sola               | 0.21 | 0.21 | 0.21 | 4169    | 4169    | 4169    |
| VEN | Venezuela | 31978 | Petit                    | 0.21 | 0.21 | 0.21 | 8524    | 8524    | 8524    |
| VEN | Venezuela | 31979 | Piritu                   | 0.21 | 0.21 | 0.21 | 7125    | 7125    | 7125    |
| VEN | Venezuela | 31980 | San Francisco            | 0.21 | 0.21 | 0.21 | 6398    | 6398    | 6398    |
| VEN | Venezuela | 31981 | Silva                    | 0.41 | 0.46 | 0.49 | 12463   | 10812   | 9815    |

|     |           |       |                         |      |      |      |        |        |        |
|-----|-----------|-------|-------------------------|------|------|------|--------|--------|--------|
| VEN | Venezuela | 31982 | Union                   | 0.21 | 0.21 | 0.21 | 9096   | 9096   | 9096   |
| VEN | Venezuela | 31983 | Zamora                  | 0.21 | 0.21 | 0.21 | 22266  | 22266  | 22266  |
| VEN | Venezuela | 31984 | Camaguan                | 0.41 | 0.46 | 0.49 | 18497  | 16046  | 14567  |
| VEN | Venezuela | 31985 | Chaguaramas             | 0.41 | 0.46 | 0.49 | 4978   | 4318   | 3920   |
| VEN | Venezuela | 31986 | El Socorro              | 0.41 | 0.46 | 0.49 | 6914   | 5998   | 5445   |
| VEN | Venezuela | 31987 | Guacharamas             | 0.41 | 0.46 | 0.49 | 503    | 436    | 396    |
| VEN | Venezuela | 31988 | Infante                 | 0.41 | 0.46 | 0.49 | 47994  | 41635  | 37797  |
| VEN | Venezuela | 31989 | Las Mercedes            | 0.41 | 0.46 | 0.49 | 14343  | 12443  | 11296  |
| VEN | Venezuela | 31990 | Mellado                 | 0.41 | 0.46 | 0.49 | 11281  | 9787   | 8884   |
| VEN | Venezuela | 31991 | Miranda                 | 0.41 | 0.46 | 0.49 | 57962  | 50282  | 45646  |
| VEN | Venezuela | 31992 | Monagas                 | 0.41 | 0.46 | 0.49 | 30132  | 26139  | 23730  |
| VEN | Venezuela | 31993 | Ortiz                   | 0.41 | 0.46 | 0.49 | 11209  | 9724   | 8828   |
| VEN | Venezuela | 31994 | Ribas                   | 0.41 | 0.46 | 0.49 | 15052  | 13057  | 11853  |
| VEN | Venezuela | 31995 | Roscio                  | 0.41 | 0.46 | 0.49 | 51745  | 44889  | 40750  |
| VEN | Venezuela | 31996 | San Jose De Guaribe     | 0.41 | 0.46 | 0.49 | 4723   | 4097   | 3720   |
| VEN | Venezuela | 31997 | Santa Maria De Ipire    | 0.41 | 0.46 | 0.49 | 5288   | 4587   | 4164   |
| VEN | Venezuela | 31998 | Zaraza                  | 0.41 | 0.46 | 0.49 | 24677  | 21407  | 19434  |
| VEN | Venezuela | 31999 | Andres Eloy Blanco      | 0.41 | 0.46 | 0.49 | 19301  | 16743  | 15200  |
| VEN | Venezuela | 32000 | Crespo                  | 0.41 | 0.46 | 0.49 | 21187  | 18380  | 16685  |
| VEN | Venezuela | 32001 | Iribarren               | 0.41 | 0.46 | 0.49 | 392095 | 340143 | 308785 |
| VEN | Venezuela | 32002 | Jimenez                 | 0.41 | 0.46 | 0.49 | 42333  | 36724  | 33338  |
| VEN | Venezuela | 32003 | Moran                   | 0.41 | 0.46 | 0.49 | 49059  | 42558  | 38635  |
| VEN | Venezuela | 32004 | Palavecino              | 0.41 | 0.46 | 0.49 | 71958  | 62424  | 56669  |
| VEN | Venezuela | 32005 | Simon Planas            | 0.41 | 0.46 | 0.49 | 16072  | 13942  | 12657  |
| VEN | Venezuela | 32006 | Torres                  | 0.21 | 0.21 | 0.21 | 111129 | 111129 | 111129 |
| VEN | Venezuela | 32007 | Urdaneta                | 0.21 | 0.21 | 0.21 | 37849  | 37849  | 37849  |
| VEN | Venezuela | 32008 | Alberto Adriani         | 0.41 | 0.54 | 0.62 | 54016  | 35136  | 24119  |
| VEN | Venezuela | 32009 | Andres Bello            | 0.41 | 0.54 | 0.62 | 6305   | 4101   | 2815   |
| VEN | Venezuela | 32010 | Antonio Pinto Salinas   | 0.41 | 0.54 | 0.62 | 9696   | 6307   | 4329   |
| VEN | Venezuela | 32011 | Aricagua                | 0.41 | 0.54 | 0.62 | 2037   | 1325   | 910    |
| VEN | Venezuela | 32012 | Arzobispo Chacon        | 0.41 | 0.54 | 0.62 | 5167   | 3361   | 2307   |
| VEN | Venezuela | 32013 | Campo Elias             | 0.41 | 0.54 | 0.62 | 40704  | 26478  | 18176  |
| VEN | Venezuela | 32014 | Caracciolo Parra Olmedo | 0.41 | 0.54 | 0.62 | 11795  | 7673   | 5267   |

|     |           |       |                      |      |      |      |        |        |       |
|-----|-----------|-------|----------------------|------|------|------|--------|--------|-------|
| VEN | Venezuela | 32015 | Cardenal Quintero    | 0.41 | 0.54 | 0.62 | 4019   | 2614   | 1795  |
| VEN | Venezuela | 32016 | Guaraque             | 0.41 | 0.54 | 0.62 | 3845   | 2501   | 1717  |
| VEN | Venezuela | 32017 | Julio Cesar Salas    | 0.41 | 0.54 | 0.62 | 5912   | 3846   | 2640  |
| VEN | Venezuela | 32018 | Justo Briceno        | 0.23 | 0.34 | 0.38 | 3178   | 2546   | 2343  |
| VEN | Venezuela | 32019 | Libertador           | 0.41 | 0.54 | 0.62 | 83372  | 54232  | 37228 |
| VEN | Venezuela | 32020 | Miranda              | 0.23 | 0.34 | 0.38 | 12905  | 10337  | 9512  |
| VEN | Venezuela | 32021 | Obispo Ramos De Lora | 0.41 | 0.54 | 0.62 | 10006  | 6509   | 4468  |
| VEN | Venezuela | 32022 | Padre Noguera        | 0.38 | 0.78 | 0.96 | 1420   | 64     | 0     |
| VEN | Venezuela | 32023 | Pueblo Llano         | 0.41 | 0.54 | 0.62 | 4160   | 2706   | 1858  |
| VEN | Venezuela | 32024 | Rangel               | 0.41 | 0.54 | 0.62 | 8091   | 5263   | 3613  |
| VEN | Venezuela | 32025 | Rivas Davila         | 0.41 | 0.54 | 0.62 | 8195   | 5331   | 3659  |
| VEN | Venezuela | 32026 | Santos Marquina      | 0.41 | 0.54 | 0.62 | 7837   | 5098   | 3500  |
| VEN | Venezuela | 32027 | Sucre                | 0.41 | 0.54 | 0.62 | 23269  | 15136  | 10390 |
| VEN | Venezuela | 32028 | Tovar                | 0.41 | 0.54 | 0.62 | 15060  | 9796   | 6725  |
| VEN | Venezuela | 32029 | Tulio Febres Cordero | 0.41 | 0.54 | 0.62 | 13761  | 8951   | 6145  |
| VEN | Venezuela | 32030 | Zea                  | 0.41 | 0.54 | 0.62 | 4637   | 3016   | 2070  |
| VEN | Venezuela | 32031 | Acevedo              | 0.41 | 0.46 | 0.49 | 38134  | 33081  | 30031 |
| VEN | Venezuela | 32032 | Andres Bello         | 0.41 | 0.46 | 0.49 | 7836   | 6798   | 6171  |
| VEN | Venezuela | 32033 | Baruta               | 0.41 | 0.46 | 0.49 | 91764  | 79605  | 72267 |
| VEN | Venezuela | 32034 | Brion                | 0.41 | 0.46 | 0.49 | 24692  | 21420  | 19445 |
| VEN | Venezuela | 32035 | Buroz                | 0.41 | 0.46 | 0.49 | 11848  | 10278  | 9331  |
| VEN | Venezuela | 32036 | Carrizal             | 0.41 | 0.46 | 0.49 | 22953  | 19912  | 18076 |
| VEN | Venezuela | 32037 | Chacao               | 0.41 | 0.46 | 0.49 | 27416  | 23784  | 21591 |
| VEN | Venezuela | 32038 | Cristobal Rojas      | 0.41 | 0.46 | 0.49 | 51224  | 44437  | 40340 |
| VEN | Venezuela | 32039 | El Hatillo           | 0.41 | 0.46 | 0.49 | 27225  | 23618  | 21441 |
| VEN | Venezuela | 32040 | Guaicaipuro          | 0.41 | 0.46 | 0.49 | 119868 | 103985 | 94399 |
| VEN | Venezuela | 32041 | Independencia        | 0.41 | 0.46 | 0.49 | 53422  | 46343  | 42071 |
| VEN | Venezuela | 32042 | Isla                 | 0.41 | 0.46 | 0.49 | 247    | 214    | 194   |
| VEN | Venezuela | 32043 | Lander               | 0.41 | 0.46 | 0.49 | 61456  | 53314  | 48398 |
| VEN | Venezuela | 32044 | Los Salias           | 0.41 | 0.46 | 0.49 | 35035  | 30393  | 27591 |
| VEN | Venezuela | 32045 | Paez                 | 0.41 | 0.46 | 0.49 | 15315  | 13286  | 12061 |
| VEN | Venezuela | 32046 | Paz Castillo         | 0.41 | 0.46 | 0.49 | 49995  | 43370  | 39372 |
| VEN | Venezuela | 32047 | Pedro Gual           | 0.41 | 0.46 | 0.49 | 9046   | 7847   | 7124  |

|     |           |       |                      |      |      |      |        |        |        |
|-----|-----------|-------|----------------------|------|------|------|--------|--------|--------|
| VEN | Venezuela | 32048 | Plaza                | 0.41 | 0.46 | 0.49 | 84216  | 73058  | 66322  |
| VEN | Venezuela | 32049 | Simon Bolivar        | 0.41 | 0.46 | 0.49 | 18722  | 16241  | 14744  |
| VEN | Venezuela | 32050 | Sucre                | 0.41 | 0.46 | 0.49 | 228855 | 198532 | 180229 |
| VEN | Venezuela | 32051 | Urdaneta             | 0.41 | 0.46 | 0.49 | 56540  | 49049  | 44527  |
| VEN | Venezuela | 32052 | Zamora               | 0.41 | 0.46 | 0.49 | 76640  | 66485  | 60356  |
| VEN | Venezuela | 32053 | Acosta               | 0.41 | 0.46 | 0.49 | 7170   | 6220   | 5646   |
| VEN | Venezuela | 32054 | Bolivar              | 0.41 | 0.46 | 0.49 | 13879  | 12040  | 10930  |
| VEN | Venezuela | 32055 | Caripe               | 0.41 | 0.46 | 0.49 | 13278  | 11519  | 10457  |
| VEN | Venezuela | 32056 | Cedeno               | 0.41 | 0.46 | 0.49 | 14711  | 12762  | 11585  |
| VEN | Venezuela | 32057 | D. Pedernales        | 0.41 | 0.46 | 0.49 | 5      | 5      | 4      |
| VEN | Venezuela | 32058 | Ezequiel Zamora      | 0.41 | 0.46 | 0.49 | 24901  | 21602  | 19610  |
| VEN | Venezuela | 32059 | Libertador           | 0.41 | 0.46 | 0.49 | 18786  | 16297  | 14794  |
| VEN | Venezuela | 32060 | Maturin              | 0.41 | 0.46 | 0.49 | 239632 | 207881 | 188717 |
| VEN | Venezuela | 32061 | Piar                 | 0.41 | 0.46 | 0.49 | 18915  | 16409  | 14896  |
| VEN | Venezuela | 32062 | Punceres             | 0.41 | 0.46 | 0.49 | 11226  | 9739   | 8841   |
| VEN | Venezuela | 32063 | Sotillo              | 0.41 | 0.46 | 0.49 | 18642  | 16172  | 14681  |
| VEN | Venezuela | 32069 | Name Unknown         | 0.41 | 0.46 | 0.49 | 365    | 316    | 287    |
| VEN | Venezuela | 32070 | Antolin Del Cami     | 0.41 | 0.46 | 0.49 | 10957  | 9506   | 8629   |
| VEN | Venezuela | 32071 | Arismendi            | 0.41 | 0.46 | 0.49 | 12365  | 10727  | 9738   |
| VEN | Venezuela | 32072 | Diaz                 | 0.41 | 0.46 | 0.49 | 33049  | 28670  | 26027  |
| VEN | Venezuela | 32073 | Garcia               | 0.41 | 0.46 | 0.49 | 32080  | 27830  | 25264  |
| VEN | Venezuela | 32074 | Gomez                | 0.41 | 0.46 | 0.49 | 16912  | 14671  | 13319  |
| VEN | Venezuela | 32075 | Isla                 | 0.41 | 0.46 | 0.49 | 1      | 1      | 1      |
| VEN | Venezuela | 32076 | Isla De Coche        | 0.41 | 0.46 | 0.49 | 3241   | 2812   | 2552   |
| VEN | Venezuela | 32077 | Isla De Cubagua      | 0.41 | 0.46 | 0.49 | 13282  | 11522  | 10460  |
| VEN | Venezuela | 32078 | Isla La Tortuga      | 0.41 | 0.46 | 0.49 | 631    | 547    | 497    |
| VEN | Venezuela | 32079 | Maneiro              | 0.41 | 0.46 | 0.49 | 20084  | 17423  | 15817  |
| VEN | Venezuela | 32080 | Marcano              | 0.41 | 0.46 | 0.49 | 12777  | 11084  | 10062  |
| VEN | Venezuela | 32081 | Marino               | 0.41 | 0.46 | 0.49 | 35549  | 30839  | 27995  |
| VEN | Venezuela | 32082 | Peninsula De Macanao | 0.41 | 0.46 | 0.49 | 11178  | 9697   | 8803   |
| VEN | Venezuela | 32083 | Agua Blanca          | 0.41 | 0.46 | 0.49 | 8815   | 7647   | 6942   |
| VEN | Venezuela | 32084 | Araure               | 0.41 | 0.46 | 0.49 | 64512  | 55965  | 50805  |
| VEN | Venezuela | 32085 | Esteller             | 0.41 | 0.46 | 0.49 | 18312  | 15886  | 14421  |



|     |           |       |                          |      |      |      |        |        |        |
|-----|-----------|-------|--------------------------|------|------|------|--------|--------|--------|
| VEN | Venezuela | 32086 | Guanare                  | 0.41 | 0.46 | 0.49 | 78783  | 68344  | 62043  |
| VEN | Venezuela | 32087 | Guanarito                | 0.41 | 0.46 | 0.49 | 15288  | 13262  | 12040  |
| VEN | Venezuela | 32088 | Monsenor Jose Vicente De | 0.41 | 0.46 | 0.49 | 9263   | 8035   | 7295   |
| VEN | Venezuela | 32089 | Ospino                   | 0.41 | 0.46 | 0.49 | 21122  | 18323  | 16634  |
| VEN | Venezuela | 32090 | Paez                     | 0.41 | 0.46 | 0.49 | 68780  | 59667  | 54166  |
| VEN | Venezuela | 32091 | Papelon                  | 0.41 | 0.46 | 0.49 | 7034   | 6102   | 5540   |
| VEN | Venezuela | 32092 | San Genaro De Boconoito  | 0.41 | 0.46 | 0.49 | 10452  | 9067   | 8231   |
| VEN | Venezuela | 32093 | San Rafael De Onoto      | 0.41 | 0.46 | 0.49 | 7146   | 6199   | 5628   |
| VEN | Venezuela | 32094 | Santa Rosalia            | 0.41 | 0.46 | 0.49 | 7278   | 6314   | 5732   |
| VEN | Venezuela | 32095 | Sucre                    | 0.38 | 0.72 | 0.92 | 17358  | 3119   | 0      |
| VEN | Venezuela | 32096 | Turen                    | 0.41 | 0.46 | 0.49 | 25871  | 22443  | 20374  |
| VEN | Venezuela | 32097 | Andres Eloy Blanco       | 0.41 | 0.46 | 0.49 | 10105  | 8766   | 7958   |
| VEN | Venezuela | 32098 | Andres Mata              | 0.41 | 0.46 | 0.49 | 8444   | 7325   | 6650   |
| VEN | Venezuela | 32099 | Arismendi                | 0.41 | 0.46 | 0.49 | 18534  | 16078  | 14596  |
| VEN | Venezuela | 32100 | Bermudez                 | 0.41 | 0.46 | 0.49 | 52606  | 45636  | 41429  |
| VEN | Venezuela | 32101 | Bolivar                  | 0.41 | 0.46 | 0.49 | 8760   | 7599   | 6899   |
| VEN | Venezuela | 32102 | Cajigal                  | 0.41 | 0.46 | 0.49 | 8307   | 7206   | 6542   |
| VEN | Venezuela | 32103 | Cruz Salmeron Acosta     | 0.41 | 0.46 | 0.49 | 13717  | 11899  | 10802  |
| VEN | Venezuela | 32104 | Isla                     | 0.41 | 0.46 | 0.49 | 16970  | 14721  | 13364  |
| VEN | Venezuela | 32105 | Libertador               | 0.41 | 0.46 | 0.49 | 3734   | 3239   | 2941   |
| VEN | Venezuela | 32106 | Marino                   | 0.41 | 0.46 | 0.49 | 8560   | 7426   | 6741   |
| VEN | Venezuela | 32107 | Mejia                    | 0.41 | 0.46 | 0.49 | 5741   | 4980   | 4521   |
| VEN | Venezuela | 32108 | Montes                   | 0.41 | 0.46 | 0.49 | 21811  | 18921  | 17176  |
| VEN | Venezuela | 32109 | Ribero                   | 0.41 | 0.46 | 0.49 | 23131  | 20066  | 18216  |
| VEN | Venezuela | 32110 | Sucre                    | 0.41 | 0.46 | 0.49 | 143282 | 124297 | 112838 |
| VEN | Venezuela | 32111 | Valdez                   | 0.41 | 0.46 | 0.49 | 15045  | 13051  | 11848  |
| VEN | Venezuela | 32112 | Andres Bello             | 0.41 | 0.54 | 0.62 | 8669   | 5639   | 3871   |
| VEN | Venezuela | 32113 | Ayacucho                 | 0.41 | 0.54 | 0.62 | 25153  | 16362  | 11232  |
| VEN | Venezuela | 32114 | Bolivar                  | 0.41 | 0.54 | 0.62 | 26579  | 17289  | 11868  |
| VEN | Venezuela | 32115 | Cardenas                 | 0.41 | 0.54 | 0.62 | 51801  | 33696  | 23131  |
| VEN | Venezuela | 32116 | Cordoba                  | 0.41 | 0.54 | 0.62 | 14431  | 9387   | 6444   |
| VEN | Venezuela | 32117 | Fernandez Feo            | 0.41 | 0.54 | 0.62 | 20138  | 13099  | 8992   |
| VEN | Venezuela | 32118 | Garcia De Hevia          | 0.41 | 0.54 | 0.62 | 19665  | 12792  | 8781   |

|     |           |       |                           |      |      |      |        |       |       |
|-----|-----------|-------|---------------------------|------|------|------|--------|-------|-------|
| VEN | Venezuela | 32119 | Guasimos                  | 0.41 | 0.54 | 0.62 | 17531  | 11404 | 7828  |
| VEN | Venezuela | 32120 | Independencia             | 0.41 | 0.54 | 0.62 | 14700  | 9562  | 6564  |
| VEN | Venezuela | 32121 | Jauregui                  | 0.41 | 0.54 | 0.62 | 22033  | 14332 | 9839  |
| VEN | Venezuela | 32122 | Junin                     | 0.38 | 0.78 | 0.96 | 37077  | 1683  | 0     |
| VEN | Venezuela | 32123 | Libertad                  | 0.41 | 0.54 | 0.62 | 11783  | 7665  | 5262  |
| VEN | Venezuela | 32124 | Libertador                | 0.41 | 0.54 | 0.62 | 9324   | 6065  | 4164  |
| VEN | Venezuela | 32125 | Lobatera                  | 0.41 | 0.54 | 0.62 | 6883   | 4478  | 3074  |
| VEN | Venezuela | 32126 | Michelena                 | 0.41 | 0.54 | 0.62 | 7754   | 5044  | 3462  |
| VEN | Venezuela | 32127 | Panamericano              | 0.41 | 0.54 | 0.62 | 15818  | 10289 | 7063  |
| VEN | Venezuela | 32128 | Pedro Maria Urena         | 0.41 | 0.54 | 0.62 | 22612  | 14709 | 10097 |
| VEN | Venezuela | 32129 | Samuel Dario Maldonado    | 0.41 | 0.54 | 0.62 | 8916   | 5800  | 3981  |
| VEN | Venezuela | 32130 | San Cristobal             | 0.41 | 0.54 | 0.62 | 120339 | 78279 | 53735 |
| VEN | Venezuela | 32131 | Seboruco                  | 0.41 | 0.54 | 0.62 | 8448   | 5495  | 3772  |
| VEN | Venezuela | 32132 | Sucre                     | 0.41 | 0.54 | 0.62 | 3366   | 2189  | 1503  |
| VEN | Venezuela | 32133 | Uribante                  | 0.41 | 0.54 | 0.62 | 7702   | 5010  | 3439  |
| VEN | Venezuela | 32134 | Bocono                    | 0.41 | 0.54 | 0.62 | 34404  | 22379 | 15362 |
| VEN | Venezuela | 32135 | Candelaria                | 0.41 | 0.54 | 0.62 | 13043  | 8484  | 5824  |
| VEN | Venezuela | 32136 | Carache                   | 0.41 | 0.54 | 0.62 | 10882  | 7078  | 4859  |
| VEN | Venezuela | 32137 | Escuque                   | 0.41 | 0.54 | 0.62 | 11794  | 7672  | 5266  |
| VEN | Venezuela | 32138 | Miranda                   | 0.41 | 0.54 | 0.62 | 14584  | 9487  | 6512  |
| VEN | Venezuela | 32139 | Monte Carmelo             | 0.41 | 0.54 | 0.62 | 5521   | 3591  | 2465  |
| VEN | Venezuela | 32140 | Motatan                   | 0.41 | 0.54 | 0.62 | 8865   | 5767  | 3958  |
| VEN | Venezuela | 32141 | Pampan                    | 0.41 | 0.54 | 0.62 | 19277  | 12540 | 8608  |
| VEN | Venezuela | 32142 | Rafael Rangel             | 0.41 | 0.54 | 0.62 | 15454  | 10053 | 6901  |
| VEN | Venezuela | 32143 | San Rafael De Carvajal    | 0.41 | 0.54 | 0.62 | 21937  | 14270 | 9796  |
| VEN | Venezuela | 32144 | Sucre                     | 0.41 | 0.54 | 0.62 | 19919  | 12957 | 8894  |
| VEN | Venezuela | 32145 | Trujillo                  | 0.41 | 0.54 | 0.62 | 33123  | 21546 | 14790 |
| VEN | Venezuela | 32146 | Urdaneta                  | 0.23 | 0.34 | 0.38 | 20884  | 16729 | 15392 |
| VEN | Venezuela | 32147 | Valera                    | 0.41 | 0.54 | 0.62 | 51184  | 33295 | 22855 |
| VEN | Venezuela | 32148 | Autonomo Bolivar          | 0.41 | 0.46 | 0.49 | 19258  | 16706 | 15166 |
| VEN | Venezuela | 32149 | Autonomo Bruzual          | 0.41 | 0.46 | 0.49 | 27926  | 24226 | 21992 |
| VEN | Venezuela | 32150 | Autonomo Jose Antonio Pae | 0.41 | 0.46 | 0.49 | 8218   | 7129  | 6472  |
| VEN | Venezuela | 32151 | Autonomo Nirgua           | 0.41 | 0.46 | 0.49 | 24838  | 21547 | 19561 |

|     |           |       |                       |      |      |      |        |        |        |
|-----|-----------|-------|-----------------------|------|------|------|--------|--------|--------|
| VEN | Venezuela | 32152 | Autonomo Pena         | 0.41 | 0.46 | 0.49 | 42363  | 36750  | 33362  |
| VEN | Venezuela | 32153 | Autonomo San Felipe   | 0.41 | 0.46 | 0.49 | 92277  | 80050  | 72670  |
| VEN | Venezuela | 32154 | Autonomo Sucre        | 0.41 | 0.46 | 0.49 | 23200  | 20126  | 18270  |
| VEN | Venezuela | 32155 | Autonomo Urachique    | 0.41 | 0.46 | 0.49 | 9093   | 7888   | 7161   |
| VEN | Venezuela | 32156 | Almirante Padilla     | 0.23 | 0.34 | 0.38 | 6046   | 4843   | 4456   |
| VEN | Venezuela | 32157 | Baralt                | 0.41 | 0.54 | 0.62 | 36799  | 23937  | 16432  |
| VEN | Venezuela | 32158 | Cabimas               | 0.41 | 0.54 | 0.62 | 122263 | 79530  | 54594  |
| VEN | Venezuela | 32159 | Catatumbo             | 0.41 | 0.54 | 0.62 | 30476  | 19824  | 13608  |
| VEN | Venezuela | 32160 | Colon                 | 0.41 | 0.54 | 0.62 | 66307  | 43132  | 29608  |
| VEN | Venezuela | 32161 | Isla                  | 0.41 | 0.54 | 0.62 | 476    | 310    | 213    |
| VEN | Venezuela | 32162 | Jesus Enrique Lozada  | 0.41 | 0.54 | 0.62 | 52155  | 33926  | 23289  |
| VEN | Venezuela | 32163 | La Canada De Urdaneta | 0.41 | 0.54 | 0.62 | 38202  | 24850  | 17058  |
| VEN | Venezuela | 32164 | Lagunillas            | 0.41 | 0.54 | 0.62 | 82284  | 53525  | 36742  |
| VEN | Venezuela | 32165 | Machiques De Perija   | 0.41 | 0.54 | 0.62 | 52138  | 33915  | 23281  |
| VEN | Venezuela | 32166 | Mara                  | 0.41 | 0.54 | 0.62 | 88436  | 57526  | 39489  |
| VEN | Venezuela | 32167 | Maracaibo             | 0.41 | 0.54 | 0.62 | 775231 | 504275 | 346163 |
| VEN | Venezuela | 32168 | Miranda               | 0.41 | 0.54 | 0.62 | 41116  | 26745  | 18359  |
| VEN | Venezuela | 32169 | Paez                  | 0.41 | 0.54 | 0.62 | 36871  | 23984  | 16464  |
| VEN | Venezuela | 32170 | Rosario De Perija     | 0.41 | 0.54 | 0.62 | 35534  | 23114  | 15867  |
| VEN | Venezuela | 32171 | Santa Rita            | 0.41 | 0.54 | 0.62 | 25732  | 16738  | 11490  |
| VEN | Venezuela | 32172 | Sucre                 | 0.41 | 0.54 | 0.62 | 24554  | 15972  | 10964  |
| VEN | Venezuela | 32173 | Valmore Rodriguez     | 0.41 | 0.54 | 0.62 | 21540  | 14011  | 9618   |
| ZMB | Zambia    | 65221 | Chavuma               | 0.00 | 0.00 | 0.00 | 26994  | 26994  | 26994  |
| ZMB | Zambia    | 65222 | Kabompo               | 0.00 | 0.00 | 0.00 | 86272  | 86272  | 86272  |
| ZMB | Zambia    | 65223 | Kasempa               | 0.00 | 0.00 | 0.00 | 63830  | 63830  | 63830  |
| ZMB | Zambia    | 65224 | Mufumbwe              | 0.00 | 0.00 | 0.00 | 50819  | 50819  | 50819  |
| ZMB | Zambia    | 65225 | Mwinilunga            | 0.00 | 0.00 | 0.00 | 126524 | 126524 | 126524 |
| ZMB | Zambia    | 65226 | Solwezi               | 0.00 | 0.00 | 0.00 | 225052 | 225052 | 225052 |
| ZMB | Zambia    | 65227 | Zambezi               | 0.00 | 0.00 | 0.00 | 87125  | 87125  | 87125  |
| ZMB | Zambia    | 65239 | Kalabo                | 0.00 | 0.00 | 0.00 | 122802 | 122802 | 122802 |
| ZMB | Zambia    | 65240 | Kaoma                 | 0.00 | 0.00 | 0.00 | 172277 | 172277 | 172277 |
| ZMB | Zambia    | 65241 | Lukulu                | 0.00 | 0.00 | 0.00 | 72905  | 72905  | 72905  |
| ZMB | Zambia    | 65242 | Mongu                 | 0.00 | 0.00 | 0.00 | 175429 | 175429 | 175429 |

|     |        |       |            |      |      |      |        |        |        |
|-----|--------|-------|------------|------|------|------|--------|--------|--------|
| ZMB | Zambia | 65243 | Senanga    | 0.00 | 0.00 | 0.00 | 124908 | 124908 | 124908 |
| ZMB | Zambia | 65244 | Sesheke    | 0.00 | 0.00 | 0.00 | 90938  | 90938  | 90938  |
| ZMB | Zambia | 65245 | Shang'ombo | 0.00 | 0.00 | 0.00 | 88077  | 88077  | 88077  |

**Supplementary table 5:** Bias correction terms for each country and year calculated as the ratio of survey-derived Global Burden of Disease Study estimates of mean coverage of third dose diphtheria-tetanus-pertussis-containing vaccine (DTP3) and WHO/UNICEF Joint Reporting Form administratively reported estimates. An excel version of this data is also available on Dryad Digital Repository [link to be inserted upon manuscript acceptance].

| Country code | Year | GBD mean estimate | Administrative estimate | Bias correction term |
|--------------|------|-------------------|-------------------------|----------------------|
| AGO          | 1980 | 0.14              | NA                      | NA                   |
| AGO          | 1981 | 0.14              | NA                      | NA                   |
| AGO          | 1982 | 0.14              | NA                      | NA                   |
| AGO          | 1983 | 0.14              | 0.06                    | 2.37                 |
| AGO          | 1984 | 0.15              | NA                      | NA                   |
| AGO          | 1985 | 0.15              | 0.08                    | 1.87                 |
| AGO          | 1986 | 0.16              | 0.10                    | 1.55                 |
| AGO          | 1987 | 0.16              | 0.10                    | 1.62                 |
| AGO          | 1988 | 0.17              | 0.12                    | 1.43                 |
| AGO          | 1989 | 0.18              | 0.18                    | 1.02                 |
| AGO          | 1990 | 0.19              | 0.24                    | 0.81                 |
| AGO          | 1991 | 0.21              | 0.26                    | 0.80                 |
| AGO          | 1992 | 0.22              | 0.21                    | 1.04                 |
| AGO          | 1993 | 0.23              | 0.30                    | 0.77                 |
| AGO          | 1994 | 0.24              | 0.27                    | 0.91                 |
| AGO          | 1995 | 0.26              | 0.42                    | 0.62                 |
| AGO          | 1996 | 0.27              | 0.28                    | 0.97                 |
| AGO          | 1997 | 0.29              | 0.41                    | 0.70                 |
| AGO          | 1998 | 0.31              | 0.45                    | 0.68                 |
| AGO          | 1999 | 0.33              | 0.22                    | 1.51                 |
| AGO          | 2000 | 0.37              | 0.31                    | 1.19                 |
| AGO          | 2001 | 0.42              | 0.41                    | 1.01                 |
| AGO          | 2002 | 0.47              | 0.47                    | 1.00                 |
| AGO          | 2003 | 0.52              | 0.46                    | 1.14                 |
| AGO          | 2004 | 0.58              | 0.59                    | 0.99                 |
| AGO          | 2005 | 0.64              | 0.47                    | 1.35                 |
| AGO          | 2006 | 0.69              | 0.44                    | 1.56                 |
| AGO          | 2007 | 0.74              | 0.83                    | 0.89                 |
| AGO          | 2008 | 0.77              | 0.81                    | 0.96                 |
| AGO          | 2009 | 0.80              | 0.73                    | 1.10                 |
| AGO          | 2010 | 0.83              | 0.91                    | 0.91                 |
| AGO          | 2011 | 0.84              | 0.86                    | 0.98                 |
| AGO          | 2012 | 0.85              | 0.91                    | 0.94                 |
| AGO          | 2013 | 0.86              | 0.93                    | 0.93                 |
| AGO          | 2014 | 0.87              | 0.80                    | 1.08                 |
| AGO          | 2015 | 0.87              | 0.80                    | 1.09                 |
| ARG          | 1980 | 0.52              | 0.44                    | 1.18                 |
| ARG          | 1981 | 0.54              | 0.49                    | 1.11                 |
| ARG          | 1982 | 0.57              | 0.58                    | 0.99                 |
| ARG          | 1983 | 0.60              | 0.61                    | 0.99                 |
| ARG          | 1984 | 0.63              | 0.62                    | 1.02                 |
| ARG          | 1985 | 0.67              | 0.66                    | 1.01                 |
| ARG          | 1986 | 0.70              | 0.67                    | 1.04                 |
| ARG          | 1987 | 0.73              | 0.75                    | 0.97                 |
| ARG          | 1988 | 0.75              | 0.80                    | 0.94                 |
| ARG          | 1989 | 0.77              | 0.80                    | 0.97                 |
| ARG          | 1990 | 0.79              | 0.87                    | 0.91                 |
| ARG          | 1991 | 0.80              | 0.80                    | 1.00                 |
| ARG          | 1992 | 0.81              | 0.81                    | 1.01                 |

|     |      |      |      |      |
|-----|------|------|------|------|
| ARG | 1993 | 0.82 | 0.81 | 1.02 |
| ARG | 1994 | 0.83 | 0.82 | 1.01 |
| ARG | 1995 | 0.84 | 0.85 | 0.99 |
| ARG | 1996 | 0.85 | 0.83 | 1.02 |
| ARG | 1997 | 0.85 | 0.88 | 0.97 |
| ARG | 1998 | 0.86 | 0.84 | 1.02 |
| ARG | 1999 | 0.87 | 0.86 | 1.01 |
| ARG | 2000 | 0.88 | 0.83 | 1.06 |
| ARG | 2001 | 0.89 | 0.83 | 1.07 |
| ARG | 2002 | 0.90 | 0.93 | 0.97 |
| ARG | 2003 | 0.91 | 0.96 | 0.94 |
| ARG | 2004 | 0.91 | 0.98 | 0.93 |
| ARG | 2005 | 0.92 | 0.98 | 0.94 |
| ARG | 2006 | 0.92 | 0.91 | 1.01 |
| ARG | 2007 | 0.93 | 0.91 | 1.02 |
| ARG | 2008 | 0.93 | 0.93 | 1.00 |
| ARG | 2009 | 0.93 | 0.94 | 0.99 |
| ARG | 2010 | 0.93 | 0.94 | 0.99 |
| ARG | 2011 | 0.93 | 0.91 | 1.03 |
| ARG | 2012 | 0.94 | 0.91 | 1.03 |
| ARG | 2013 | 0.94 | 0.94 | 1.00 |
| ARG | 2014 | 0.94 | 0.94 | 1.00 |
| ARG | 2015 | 0.94 | 0.94 | 1.00 |
| BDI | 1980 | 0.58 | NA   | NA   |
| BDI | 1981 | 0.58 | 0.36 | 1.62 |
| BDI | 1982 | 0.59 | 0.33 | 1.80 |
| BDI | 1983 | 0.61 | 0.44 | 1.38 |
| BDI | 1984 | 0.62 | 0.26 | 2.37 |
| BDI | 1985 | 0.63 | 0.36 | 1.75 |
| BDI | 1986 | 0.64 | 0.53 | 1.21 |
| BDI | 1987 | 0.65 | 0.68 | 0.95 |
| BDI | 1988 | 0.66 | 0.68 | 0.97 |
| BDI | 1989 | 0.67 | 0.82 | 0.81 |
| BDI | 1990 | 0.67 | 0.86 | 0.78 |
| BDI | 1991 | 0.68 | 0.83 | 0.82 |
| BDI | 1992 | 0.68 | 0.80 | 0.85 |
| BDI | 1993 | 0.68 | 0.63 | 1.07 |
| BDI | 1994 | 0.67 | 0.48 | 1.40 |
| BDI | 1995 | 0.67 | 0.63 | 1.06 |
| BDI | 1996 | 0.67 | 0.55 | 1.22 |
| BDI | 1997 | 0.67 | 0.60 | 1.12 |
| BDI | 1998 | 0.68 | 0.50 | 1.35 |
| BDI | 1999 | 0.69 | 0.63 | 1.10 |
| BDI | 2000 | 0.71 | 0.68 | 1.05 |
| BDI | 2001 | 0.74 | 0.59 | 1.25 |
| BDI | 2002 | 0.77 | 0.95 | 0.81 |
| BDI | 2003 | 0.80 | 0.94 | 0.85 |
| BDI | 2004 | 0.83 | 0.83 | 1.00 |
| BDI | 2005 | 0.86 | 0.87 | 0.99 |
| BDI | 2006 | 0.89 | 0.92 | 0.97 |

|     |      |      |      |       |
|-----|------|------|------|-------|
| BDI | 2007 | 0.92 | 0.99 | 0.92  |
| BDI | 2008 | 0.93 | 0.92 | 1.01  |
| BDI | 2009 | 0.95 | 0.99 | 0.96  |
| BDI | 2010 | 0.96 | 0.96 | 1.00  |
| BDI | 2011 | 0.96 | 0.99 | 0.97  |
| BDI | 2012 | 0.97 | 0.96 | 1.01  |
| BDI | 2013 | 0.97 | 0.96 | 1.01  |
| BDI | 2014 | 0.98 | 0.95 | 1.03  |
| BDI | 2015 | 0.98 | 0.94 | 1.04  |
| BEN | 1980 | 0.45 | NA   | NA    |
| BEN | 1981 | 0.46 | NA   | NA    |
| BEN | 1982 | 0.47 | NA   | NA    |
| BEN | 1983 | 0.48 | NA   | NA    |
| BEN | 1984 | 0.49 | NA   | NA    |
| BEN | 1985 | 0.50 | 0.17 | 2.93  |
| BEN | 1986 | 0.52 | 0.17 | 3.04  |
| BEN | 1987 | 0.54 | 0.25 | 2.17  |
| BEN | 1988 | 0.57 | 0.30 | 1.90  |
| BEN | 1989 | 0.60 | 0.48 | 1.26  |
| BEN | 1990 | 0.63 | 0.78 | 0.81  |
| BEN | 1991 | 0.66 | 0.68 | 0.97  |
| BEN | 1992 | 0.68 | 0.79 | 0.86  |
| BEN | 1993 | 0.69 | 0.77 | 0.90  |
| BEN | 1994 | 0.71 | 0.86 | 0.82  |
| BEN | 1995 | 0.71 | 0.89 | 0.80  |
| BEN | 1996 | 0.71 | 0.80 | 0.89  |
| BEN | 1997 | 0.71 | 0.78 | 0.91  |
| BEN | 1998 | 0.71 | 0.81 | 0.88  |
| BEN | 1999 | 0.71 | 0.90 | 0.79  |
| BEN | 2000 | 0.71 | 0.88 | 0.81  |
| BEN | 2001 | 0.71 | 0.84 | 0.84  |
| BEN | 2002 | 0.71 | 0.93 | 0.76  |
| BEN | 2003 | 0.71 | 0.88 | 0.80  |
| BEN | 2004 | 0.71 | 0.83 | 0.85  |
| BEN | 2005 | 0.71 | 0.93 | 0.77  |
| BEN | 2006 | 0.72 | 0.93 | 0.77  |
| BEN | 2007 | 0.73 | 0.97 | 0.75  |
| BEN | 2008 | 0.73 | 0.93 | 0.79  |
| BEN | 2009 | 0.74 | 0.98 | 0.76  |
| BEN | 2010 | 0.75 | 0.98 | 0.76  |
| BEN | 2011 | 0.76 | 0.99 | 0.76  |
| BEN | 2012 | 0.76 | 0.85 | 0.90  |
| BEN | 2013 | 0.77 | 0.93 | 0.83  |
| BEN | 2014 | 0.78 | 0.90 | 0.86  |
| BEN | 2015 | 0.78 | 0.82 | 0.96  |
| BFA | 1980 | 0.32 | NA   | NA    |
| BFA | 1981 | 0.32 | 0.02 | 16.22 |
| BFA | 1982 | 0.34 | NA   | NA    |
| BFA | 1983 | 0.35 | NA   | NA    |
| BFA | 1984 | 0.36 | NA   | NA    |



|     |      |      |      |      |
|-----|------|------|------|------|
| BFA | 1985 | 0.37 | NA   | NA   |
| BFA | 1986 | 0.38 | 0.34 | 1.13 |
| BFA | 1987 | 0.39 | 0.34 | 1.15 |
| BFA | 1988 | 0.40 | 0.23 | 1.73 |
| BFA | 1989 | 0.41 | NA   | NA   |
| BFA | 1990 | 0.41 | NA   | NA   |
| BFA | 1991 | 0.41 | NA   | NA   |
| BFA | 1992 | 0.41 | 0.39 | 1.06 |
| BFA | 1993 | 0.42 | 0.47 | 0.89 |
| BFA | 1994 | 0.42 | 0.41 | 1.03 |
| BFA | 1995 | 0.43 | 0.47 | 0.92 |
| BFA | 1996 | 0.45 | 0.48 | 0.93 |
| BFA | 1997 | 0.47 | 0.70 | 0.67 |
| BFA | 1998 | 0.51 | 0.40 | 1.27 |
| BFA | 1999 | 0.56 | 0.34 | 1.64 |
| BFA | 2000 | 0.62 | 0.57 | 1.08 |
| BFA | 2001 | 0.67 | 0.68 | 0.99 |
| BFA | 2002 | 0.73 | 0.69 | 1.05 |
| BFA | 2003 | 0.77 | 0.84 | 0.92 |
| BFA | 2004 | 0.81 | 0.88 | 0.92 |
| BFA | 2005 | 0.84 | 0.96 | 0.88 |
| BFA | 2006 | 0.87 | 0.95 | 0.91 |
| BFA | 2007 | 0.89 | 0.99 | 0.90 |
| BFA | 2008 | 0.90 | 0.99 | 0.91 |
| BFA | 2009 | 0.91 | 0.99 | 0.92 |
| BFA | 2010 | 0.92 | 0.91 | 1.01 |
| BFA | 2011 | 0.93 | 0.91 | 1.02 |
| BFA | 2012 | 0.93 | 0.90 | 1.04 |
| BFA | 2013 | 0.94 | 0.88 | 1.06 |
| BFA | 2014 | 0.94 | 0.91 | 1.03 |
| BFA | 2015 | 0.94 | 0.91 | 1.03 |
| BOL | 1980 | 0.30 | 0.11 | 2.77 |
| BOL | 1981 | 0.32 | 0.13 | 2.46 |
| BOL | 1982 | 0.34 | 0.12 | 2.81 |
| BOL | 1983 | 0.35 | 0.10 | 3.54 |
| BOL | 1984 | 0.37 | 0.06 | 6.19 |
| BOL | 1985 | 0.39 | 0.33 | 1.18 |
| BOL | 1986 | 0.40 | 0.29 | 1.39 |
| BOL | 1987 | 0.42 | 0.24 | 1.74 |
| BOL | 1988 | 0.43 | 0.39 | 1.10 |
| BOL | 1989 | 0.45 | 0.39 | 1.15 |
| BOL | 1990 | 0.47 | 0.41 | 1.15 |
| BOL | 1991 | 0.50 | 0.58 | 0.86 |
| BOL | 1992 | 0.53 | 0.77 | 0.68 |
| BOL | 1993 | 0.56 | 0.81 | 0.69 |
| BOL | 1994 | 0.59 | 0.81 | 0.73 |
| BOL | 1995 | 0.63 | 0.88 | 0.71 |
| BOL | 1996 | 0.66 | 0.82 | 0.80 |
| BOL | 1997 | 0.68 | 0.78 | 0.88 |
| BOL | 1998 | 0.71 | 0.76 | 0.94 |

|     |      |      |      |      |
|-----|------|------|------|------|
| BOL | 1999 | 0.74 | 0.87 | 0.85 |
| BOL | 2000 | 0.76 | 0.89 | 0.85 |
| BOL | 2001 | 0.78 | 0.91 | 0.86 |
| BOL | 2002 | 0.80 | 0.99 | 0.81 |
| BOL | 2003 | 0.82 | 0.99 | 0.83 |
| BOL | 2004 | 0.83 | 0.84 | 0.99 |
| BOL | 2005 | 0.85 | 0.85 | 1.00 |
| BOL | 2006 | 0.86 | 0.83 | 1.04 |
| BOL | 2007 | 0.88 | 0.82 | 1.07 |
| BOL | 2008 | 0.89 | 0.83 | 1.07 |
| BOL | 2009 | 0.90 | 0.85 | 1.06 |
| BOL | 2010 | 0.91 | 0.80 | 1.14 |
| BOL | 2011 | 0.92 | 0.82 | 1.13 |
| BOL | 2012 | 0.93 | 0.80 | 1.16 |
| BOL | 2013 | 0.94 | 0.80 | 1.17 |
| BOL | 2014 | 0.94 | 0.85 | 1.11 |
| BOL | 2015 | 0.95 | 0.89 | 1.07 |
| BRA | 1980 | 0.58 | 0.37 | 1.57 |
| BRA | 1981 | 0.60 | 0.47 | 1.29 |
| BRA | 1982 | 0.63 | 0.56 | 1.12 |
| BRA | 1983 | 0.65 | 0.60 | 1.09 |
| BRA | 1984 | 0.67 | 0.68 | 0.99 |
| BRA | 1985 | 0.69 | 0.66 | 1.05 |
| BRA | 1986 | 0.71 | 0.58 | 1.22 |
| BRA | 1987 | 0.72 | 0.58 | 1.25 |
| BRA | 1988 | 0.74 | 0.58 | 1.28 |
| BRA | 1989 | 0.76 | 0.56 | 1.36 |
| BRA | 1990 | 0.78 | 0.66 | 1.18 |
| BRA | 1991 | 0.80 | 0.78 | 1.03 |
| BRA | 1992 | 0.83 | 0.71 | 1.16 |
| BRA | 1993 | 0.84 | 0.75 | 1.13 |
| BRA | 1994 | 0.86 | 0.74 | 1.16 |
| BRA | 1995 | 0.87 | 0.81 | 1.08 |
| BRA | 1996 | 0.89 | 0.77 | 1.15 |
| BRA | 1997 | 0.90 | 0.79 | 1.14 |
| BRA | 1998 | 0.92 | 0.93 | 0.99 |
| BRA | 1999 | 0.93 | 0.94 | 0.99 |
| BRA | 2000 | 0.94 | 0.98 | 0.96 |
| BRA | 2001 | 0.95 | 0.98 | 0.97 |
| BRA | 2002 | 0.96 | 0.99 | 0.97 |
| BRA | 2003 | 0.96 | 0.99 | 0.97 |
| BRA | 2004 | 0.97 | 0.99 | 0.98 |
| BRA | 2005 | 0.97 | 0.99 | 0.98 |
| BRA | 2006 | 0.97 | 0.99 | 0.98 |
| BRA | 2007 | 0.98 | 0.99 | 0.99 |
| BRA | 2008 | 0.98 | 0.99 | 0.99 |
| BRA | 2009 | 0.98 | 0.99 | 0.99 |
| BRA | 2010 | 0.98 | 0.99 | 0.99 |
| BRA | 2011 | 0.98 | 0.99 | 0.99 |
| BRA | 2012 | 0.98 | 0.95 | 1.03 |

|     |      |      |      |      |
|-----|------|------|------|------|
| BRA | 2013 | 0.98 | 0.97 | 1.01 |
| BRA | 2014 | 0.98 | 0.93 | 1.06 |
| BRA | 2015 | 0.98 | 0.96 | 1.03 |
| CAF | 1980 | 0.32 | 0.13 | 2.44 |
| CAF | 1981 | 0.33 | 0.11 | 2.99 |
| CAF | 1982 | 0.34 | 0.14 | 2.46 |
| CAF | 1983 | 0.36 | 0.16 | 2.26 |
| CAF | 1984 | 0.38 | 0.17 | 2.25 |
| CAF | 1985 | 0.41 | 0.20 | 2.03 |
| CAF | 1986 | 0.43 | 0.19 | 2.26 |
| CAF | 1987 | 0.45 | 0.18 | 2.51 |
| CAF | 1988 | 0.47 | 0.30 | 1.58 |
| CAF | 1989 | 0.49 | 0.43 | 1.14 |
| CAF | 1990 | 0.50 | 0.61 | 0.82 |
| CAF | 1991 | 0.49 | 0.66 | 0.75 |
| CAF | 1992 | 0.48 | 0.31 | 1.55 |
| CAF | 1993 | 0.46 | NA   | NA   |
| CAF | 1994 | 0.44 | 0.40 | 1.11 |
| CAF | 1995 | 0.43 | 0.45 | 0.95 |
| CAF | 1996 | 0.41 | 0.53 | 0.78 |
| CAF | 1997 | 0.40 | 0.53 | 0.76 |
| CAF | 1998 | 0.40 | 0.45 | 0.89 |
| CAF | 1999 | 0.41 | 0.27 | 1.52 |
| CAF | 2000 | 0.43 | 0.29 | 1.47 |
| CAF | 2001 | 0.45 | 0.23 | 1.94 |
| CAF | 2002 | 0.47 | 0.23 | 2.02 |
| CAF | 2003 | 0.48 | 0.28 | 1.70 |
| CAF | 2004 | 0.48 | 0.50 | 0.96 |
| CAF | 2005 | 0.47 | 0.46 | 1.02 |
| CAF | 2006 | 0.46 | 0.88 | 0.52 |
| CAF | 2007 | 0.44 | 0.84 | 0.52 |
| CAF | 2008 | 0.42 | 0.51 | 0.82 |
| CAF | 2009 | 0.41 | 0.76 | 0.54 |
| CAF | 2010 | 0.41 | 0.58 | 0.70 |
| CAF | 2011 | 0.41 | 0.64 | 0.64 |
| CAF | 2012 | 0.42 | 0.59 | 0.71 |
| CAF | 2013 | 0.42 | 0.28 | 1.51 |
| CAF | 2014 | 0.43 | 0.45 | 0.96 |
| CAF | 2015 | 0.44 | 0.47 | 0.94 |
| CIV | 1980 | 0.48 | NA   | NA   |
| CIV | 1981 | 0.48 | NA   | NA   |
| CIV | 1982 | 0.48 | NA   | NA   |
| CIV | 1983 | 0.48 | NA   | NA   |
| CIV | 1984 | 0.48 | 0.19 | 2.52 |
| CIV | 1985 | 0.48 | 0.25 | 1.93 |
| CIV | 1986 | 0.49 | 0.30 | 1.62 |
| CIV | 1987 | 0.49 | 0.73 | 0.67 |
| CIV | 1988 | 0.49 | 0.25 | 1.97 |
| CIV | 1989 | 0.50 | 0.42 | 1.18 |
| CIV | 1990 | 0.50 | NA   | NA   |

|     |      |      |      |      |
|-----|------|------|------|------|
| CIV | 1991 | 0.51 | 0.54 | 0.95 |
| CIV | 1992 | 0.52 | 0.49 | 1.07 |
| CIV | 1993 | 0.54 | 0.50 | 1.08 |
| CIV | 1994 | 0.56 | 0.41 | 1.37 |
| CIV | 1995 | 0.58 | 0.41 | 1.43 |
| CIV | 1996 | 0.61 | 0.55 | 1.11 |
| CIV | 1997 | 0.63 | 0.70 | 0.90 |
| CIV | 1998 | 0.65 | 0.64 | 1.02 |
| CIV | 1999 | 0.67 | 0.58 | 1.15 |
| CIV | 2000 | 0.68 | 0.62 | 1.09 |
| CIV | 2001 | 0.68 | 0.59 | 1.16 |
| CIV | 2002 | 0.68 | 0.73 | 0.94 |
| CIV | 2003 | 0.68 | 0.48 | 1.43 |
| CIV | 2004 | 0.68 | 0.50 | 1.37 |
| CIV | 2005 | 0.68 | 0.56 | 1.22 |
| CIV | 2006 | 0.68 | 0.77 | 0.88 |
| CIV | 2007 | 0.68 | 0.76 | 0.89 |
| CIV | 2008 | 0.68 | 0.74 | 0.92 |
| CIV | 2009 | 0.69 | 0.81 | 0.85 |
| CIV | 2010 | 0.70 | 0.85 | 0.82 |
| CIV | 2011 | 0.72 | 0.62 | 1.16 |
| CIV | 2012 | 0.74 | 0.94 | 0.79 |
| CIV | 2013 | 0.77 | 0.99 | 0.77 |
| CIV | 2014 | 0.78 | 0.87 | 0.90 |
| CIV | 2015 | 0.80 | 0.91 | 0.88 |
| CMR | 1980 | 0.39 | NA   | NA   |
| CMR | 1981 | 0.40 | 0.05 | 7.97 |
| CMR | 1982 | 0.41 | NA   | NA   |
| CMR | 1983 | 0.43 | 0.25 | 1.71 |
| CMR | 1984 | 0.44 | 0.27 | 1.63 |
| CMR | 1985 | 0.45 | 0.50 | 0.90 |
| CMR | 1986 | 0.46 | NA   | NA   |
| CMR | 1987 | 0.46 | NA   | NA   |
| CMR | 1988 | 0.45 | 0.20 | 2.27 |
| CMR | 1989 | 0.45 | 0.18 | 2.51 |
| CMR | 1990 | 0.45 | 0.36 | 1.25 |
| CMR | 1991 | 0.45 | 0.34 | 1.32 |
| CMR | 1992 | 0.45 | 0.37 | 1.21 |
| CMR | 1993 | 0.45 | 0.34 | 1.32 |
| CMR | 1994 | 0.45 | 0.38 | 1.19 |
| CMR | 1995 | 0.46 | 0.46 | 1.00 |
| CMR | 1996 | 0.47 | 0.44 | 1.07 |
| CMR | 1997 | 0.49 | 0.43 | 1.13 |
| CMR | 1998 | 0.51 | 0.48 | 1.06 |
| CMR | 1999 | 0.54 | 0.48 | 1.13 |
| CMR | 2000 | 0.57 | 0.53 | 1.08 |
| CMR | 2001 | 0.61 | 0.43 | 1.41 |
| CMR | 2002 | 0.64 | 0.63 | 1.01 |
| CMR | 2003 | 0.66 | 0.73 | 0.91 |
| CMR | 2004 | 0.68 | 0.73 | 0.93 |

|     |      |      |      |      |
|-----|------|------|------|------|
| CMR | 2005 | 0.69 | 0.80 | 0.87 |
| CMR | 2006 | 0.70 | 0.81 | 0.87 |
| CMR | 2007 | 0.71 | 0.82 | 0.87 |
| CMR | 2008 | 0.72 | 0.84 | 0.86 |
| CMR | 2009 | 0.73 | 0.80 | 0.91 |
| CMR | 2010 | 0.73 | 0.84 | 0.87 |
| CMR | 2011 | 0.75 | 0.82 | 0.91 |
| CMR | 2012 | 0.76 | 0.85 | 0.89 |
| CMR | 2013 | 0.77 | 0.89 | 0.86 |
| CMR | 2014 | 0.78 | 0.87 | 0.89 |
| CMR | 2015 | 0.79 | 0.84 | 0.94 |
| COD | 1980 | 0.24 | NA   | NA   |
| COD | 1981 | 0.25 | 0.18 | 1.37 |
| COD | 1982 | 0.26 | NA   | NA   |
| COD | 1983 | 0.26 | 0.16 | 1.65 |
| COD | 1984 | 0.27 | NA   | NA   |
| COD | 1985 | 0.28 | 0.37 | 0.77 |
| COD | 1986 | 0.29 | 0.39 | 0.75 |
| COD | 1987 | 0.30 | 0.38 | 0.78 |
| COD | 1988 | 0.30 | 0.41 | 0.73 |
| COD | 1989 | 0.30 | 0.38 | 0.78 |
| COD | 1990 | 0.29 | 0.36 | 0.80 |
| COD | 1991 | 0.28 | 0.16 | 1.73 |
| COD | 1992 | 0.27 | NA   | NA   |
| COD | 1993 | 0.25 | 0.29 | 0.87 |
| COD | 1994 | 0.24 | 0.29 | 0.83 |
| COD | 1995 | 0.23 | 0.23 | 1.00 |
| COD | 1996 | 0.22 | 0.18 | 1.24 |
| COD | 1997 | 0.22 | 0.18 | 1.24 |
| COD | 1998 | 0.24 | 0.18 | 1.31 |
| COD | 1999 | 0.26 | 0.25 | 1.05 |
| COD | 2000 | 0.30 | 0.40 | 0.75 |
| COD | 2001 | 0.34 | 0.32 | 1.06 |
| COD | 2002 | 0.38 | 0.43 | 0.89 |
| COD | 2003 | 0.43 | 0.49 | 0.87 |
| COD | 2004 | 0.47 | 0.64 | 0.73 |
| COD | 2005 | 0.51 | 0.73 | 0.70 |
| COD | 2006 | 0.54 | 0.77 | 0.71 |
| COD | 2007 | 0.58 | 0.87 | 0.66 |
| COD | 2008 | 0.60 | 0.83 | 0.73 |
| COD | 2009 | 0.62 | 0.92 | 0.68 |
| COD | 2010 | 0.64 | 0.78 | 0.82 |
| COD | 2011 | 0.66 | 0.90 | 0.73 |
| COD | 2012 | 0.67 | 0.89 | 0.75 |
| COD | 2013 | 0.68 | 0.87 | 0.78 |
| COD | 2014 | 0.69 | 0.93 | 0.74 |
| COD | 2015 | 0.70 | 0.94 | 0.74 |
| COG | 1980 | 0.55 | NA   | NA   |
| COG | 1981 | 0.56 | 0.42 | 1.34 |
| COG | 1982 | 0.58 | NA   | NA   |

|     |      |      |      |      |
|-----|------|------|------|------|
| COG | 1983 | 0.60 | 0.50 | 1.19 |
| COG | 1984 | 0.61 | 0.53 | 1.15 |
| COG | 1985 | 0.62 | 0.54 | 1.16 |
| COG | 1986 | 0.64 | 0.68 | 0.93 |
| COG | 1987 | 0.64 | 0.57 | 1.12 |
| COG | 1988 | 0.64 | 0.50 | 1.28 |
| COG | 1989 | 0.64 | 0.66 | 0.97 |
| COG | 1990 | 0.63 | 0.77 | 0.82 |
| COG | 1991 | 0.61 | 0.70 | 0.87 |
| COG | 1992 | 0.59 | 0.65 | 0.91 |
| COG | 1993 | 0.56 | 0.60 | 0.94 |
| COG | 1994 | 0.53 | NA   | NA   |
| COG | 1995 | 0.50 | 0.47 | 1.07 |
| COG | 1996 | 0.48 | 0.75 | 0.63 |
| COG | 1997 | 0.45 | 0.23 | 1.94 |
| COG | 1998 | 0.44 | NA   | NA   |
| COG | 1999 | 0.45 | 0.29 | 1.56 |
| COG | 2000 | 0.48 | 0.33 | 1.46 |
| COG | 2001 | 0.52 | 0.31 | 1.67 |
| COG | 2002 | 0.56 | 0.41 | 1.36 |
| COG | 2003 | 0.59 | 0.50 | 1.18 |
| COG | 2004 | 0.62 | 0.67 | 0.93 |
| COG | 2005 | 0.65 | 0.65 | 0.99 |
| COG | 2006 | 0.67 | 0.79 | 0.85 |
| COG | 2007 | 0.69 | 0.80 | 0.86 |
| COG | 2008 | 0.71 | 0.89 | 0.79 |
| COG | 2009 | 0.72 | 0.91 | 0.79 |
| COG | 2010 | 0.74 | 0.90 | 0.82 |
| COG | 2011 | 0.76 | 0.90 | 0.84 |
| COG | 2012 | 0.77 | 0.85 | 0.91 |
| COG | 2013 | 0.79 | 0.85 | 0.92 |
| COG | 2014 | 0.80 | 0.90 | 0.89 |
| COG | 2015 | 0.81 | 0.80 | 1.01 |
| COL | 1980 | 0.82 | 0.16 | 5.13 |
| COL | 1981 | 0.83 | 0.20 | 4.16 |
| COL | 1982 | 0.84 | 0.26 | 3.24 |
| COL | 1983 | 0.85 | 0.42 | 2.03 |
| COL | 1984 | 0.86 | 0.61 | 1.40 |
| COL | 1985 | 0.86 | 0.60 | 1.43 |
| COL | 1986 | 0.86 | 0.48 | 1.78 |
| COL | 1987 | 0.85 | 0.58 | 1.47 |
| COL | 1988 | 0.85 | 0.74 | 1.14 |
| COL | 1989 | 0.84 | 0.78 | 1.08 |
| COL | 1990 | 0.83 | 0.88 | 0.95 |
| COL | 1991 | 0.83 | 0.84 | 0.99 |
| COL | 1992 | 0.82 | 0.78 | 1.05 |
| COL | 1993 | 0.82 | 0.83 | 0.99 |
| COL | 1994 | 0.82 | 0.88 | 0.93 |
| COL | 1995 | 0.82 | 0.94 | 0.88 |
| COL | 1996 | 0.82 | 0.92 | 0.90 |

|     |      |      |      |      |
|-----|------|------|------|------|
| COL | 1997 | 0.82 | 0.84 | 0.98 |
| COL | 1998 | 0.82 | 0.73 | 1.13 |
| COL | 1999 | 0.83 | 0.74 | 1.12 |
| COL | 2000 | 0.84 | 0.79 | 1.06 |
| COL | 2001 | 0.85 | 0.80 | 1.06 |
| COL | 2002 | 0.86 | 0.81 | 1.06 |
| COL | 2003 | 0.87 | 0.92 | 0.94 |
| COL | 2004 | 0.88 | 0.89 | 0.99 |
| COL | 2005 | 0.89 | 0.93 | 0.96 |
| COL | 2006 | 0.90 | 0.93 | 0.97 |
| COL | 2007 | 0.91 | 0.93 | 0.98 |
| COL | 2008 | 0.91 | 0.92 | 0.99 |
| COL | 2009 | 0.92 | 0.92 | 1.00 |
| COL | 2010 | 0.92 | 0.88 | 1.05 |
| COL | 2011 | 0.93 | 0.85 | 1.09 |
| COL | 2012 | 0.93 | 0.91 | 1.02 |
| COL | 2013 | 0.94 | 0.91 | 1.03 |
| COL | 2014 | 0.94 | 0.90 | 1.04 |
| COL | 2015 | 0.94 | 0.91 | 1.04 |
| ECU | 1980 | 0.66 | 0.10 | 6.63 |
| ECU | 1981 | 0.69 | 0.26 | 2.67 |
| ECU | 1982 | 0.73 | 0.35 | 2.07 |
| ECU | 1983 | 0.75 | 0.31 | 2.43 |
| ECU | 1984 | 0.78 | 0.48 | 1.63 |
| ECU | 1985 | 0.80 | 0.41 | 1.96 |
| ECU | 1986 | 0.82 | 0.43 | 1.91 |
| ECU | 1987 | 0.83 | 0.50 | 1.67 |
| ECU | 1988 | 0.84 | 0.54 | 1.56 |
| ECU | 1989 | 0.85 | 0.55 | 1.55 |
| ECU | 1990 | 0.86 | 0.75 | 1.14 |
| ECU | 1991 | 0.86 | 0.69 | 1.25 |
| ECU | 1992 | 0.86 | 0.79 | 1.09 |
| ECU | 1993 | 0.86 | 0.76 | 1.13 |
| ECU | 1994 | 0.86 | 0.80 | 1.07 |
| ECU | 1995 | 0.85 | 0.74 | 1.15 |
| ECU | 1996 | 0.85 | 0.96 | 0.89 |
| ECU | 1997 | 0.85 | 0.76 | 1.11 |
| ECU | 1998 | 0.84 | 0.85 | 0.99 |
| ECU | 1999 | 0.84 | 0.80 | 1.05 |
| ECU | 2000 | 0.84 | 0.88 | 0.96 |
| ECU | 2001 | 0.84 | 0.90 | 0.94 |
| ECU | 2002 | 0.85 | 0.89 | 0.95 |
| ECU | 2003 | 0.85 | 0.89 | 0.96 |
| ECU | 2004 | 0.86 | 0.90 | 0.96 |
| ECU | 2005 | 0.87 | 0.94 | 0.93 |
| ECU | 2006 | 0.88 | 0.98 | 0.90 |
| ECU | 2007 | 0.90 | 0.99 | 0.90 |
| ECU | 2008 | 0.90 | 0.99 | 0.91 |
| ECU | 2009 | 0.91 | 0.99 | 0.92 |
| ECU | 2010 | 0.92 | 0.99 | 0.93 |

|     |      |      |      |      |
|-----|------|------|------|------|
| ECU | 2011 | 0.92 | 0.99 | 0.93 |
| ECU | 2012 | 0.93 | 0.99 | 0.94 |
| ECU | 2013 | 0.94 | 0.87 | 1.08 |
| ECU | 2014 | 0.94 | 0.83 | 1.14 |
| ECU | 2015 | 0.95 | 0.78 | 1.22 |
| ERI | 1980 | 0.39 | NA   | NA   |
| ERI | 1981 | 0.39 | NA   | NA   |
| ERI | 1982 | 0.38 | NA   | NA   |
| ERI | 1983 | 0.37 | NA   | NA   |
| ERI | 1984 | 0.37 | NA   | NA   |
| ERI | 1985 | 0.36 | NA   | NA   |
| ERI | 1986 | 0.36 | NA   | NA   |
| ERI | 1987 | 0.36 | NA   | NA   |
| ERI | 1988 | 0.36 | NA   | NA   |
| ERI | 1989 | 0.37 | NA   | NA   |
| ERI | 1990 | 0.38 | NA   | NA   |
| ERI | 1991 | 0.40 | NA   | NA   |
| ERI | 1992 | 0.42 | NA   | NA   |
| ERI | 1993 | 0.47 | 0.28 | 1.66 |
| ERI | 1994 | 0.52 | 0.36 | 1.46 |
| ERI | 1995 | 0.59 | 0.35 | 1.69 |
| ERI | 1996 | 0.66 | 0.46 | 1.43 |
| ERI | 1997 | 0.72 | 0.60 | 1.20 |
| ERI | 1998 | 0.78 | 0.60 | 1.29 |
| ERI | 1999 | 0.82 | 0.56 | 1.47 |
| ERI | 2000 | 0.86 | 0.52 | 1.65 |
| ERI | 2001 | 0.89 | 0.65 | 1.37 |
| ERI | 2002 | 0.91 | 0.70 | 1.30 |
| ERI | 2003 | 0.93 | 0.75 | 1.24 |
| ERI | 2004 | 0.95 | 0.80 | 1.18 |
| ERI | 2005 | 0.96 | 0.80 | 1.20 |
| ERI | 2006 | 0.96 | 0.80 | 1.21 |
| ERI | 2007 | 0.97 | 0.80 | 1.21 |
| ERI | 2008 | 0.97 | 0.85 | 1.15 |
| ERI | 2009 | 0.98 | 0.85 | 1.15 |
| ERI | 2010 | 0.98 | 0.85 | 1.15 |
| ERI | 2011 | 0.98 | 0.94 | 1.04 |
| ERI | 2012 | 0.98 | 0.94 | 1.05 |
| ERI | 2013 | 0.98 | 0.94 | 1.05 |
| ERI | 2014 | 0.98 | 0.94 | 1.05 |
| ERI | 2015 | 0.98 | 0.95 | 1.04 |
| ETH | 1980 | 0.16 | NA   | NA   |
| ETH | 1981 | 0.17 | 0.03 | 5.52 |
| ETH | 1982 | 0.17 | 0.03 | 5.74 |
| ETH | 1983 | 0.18 | 0.04 | 4.57 |
| ETH | 1984 | 0.20 | 0.04 | 4.91 |
| ETH | 1985 | 0.21 | 0.06 | 3.57 |
| ETH | 1986 | 0.23 | 0.07 | 3.36 |
| ETH | 1987 | 0.26 | 0.16 | 1.62 |
| ETH | 1988 | 0.29 | 0.16 | 1.79 |



|     |      |      |      |      |
|-----|------|------|------|------|
| ETH | 1989 | 0.31 | 0.26 | 1.21 |
| ETH | 1990 | 0.34 | 0.49 | 0.70 |
| ETH | 1991 | 0.37 | 0.21 | 1.75 |
| ETH | 1992 | 0.39 | 0.13 | 2.99 |
| ETH | 1993 | 0.41 | 0.28 | 1.46 |
| ETH | 1994 | 0.43 | 0.37 | 1.15 |
| ETH | 1995 | 0.43 | 0.57 | 0.76 |
| ETH | 1996 | 0.43 | 0.42 | 1.03 |
| ETH | 1997 | 0.43 | 0.41 | 1.05 |
| ETH | 1998 | 0.43 | 0.37 | 1.16 |
| ETH | 1999 | 0.43 | 0.40 | 1.08 |
| ETH | 2000 | 0.44 | 0.42 | 1.04 |
| ETH | 2001 | 0.44 | 0.51 | 0.87 |
| ETH | 2002 | 0.45 | 0.51 | 0.88 |
| ETH | 2003 | 0.45 | 0.52 | 0.86 |
| ETH | 2004 | 0.45 | 0.66 | 0.68 |
| ETH | 2005 | 0.44 | 0.69 | 0.64 |
| ETH | 2006 | 0.44 | 0.72 | 0.61 |
| ETH | 2007 | 0.43 | 0.73 | 0.59 |
| ETH | 2008 | 0.44 | 0.81 | 0.54 |
| ETH | 2009 | 0.45 | 0.79 | 0.57 |
| ETH | 2010 | 0.47 | 0.86 | 0.54 |
| ETH | 2011 | 0.49 | 0.87 | 0.57 |
| ETH | 2012 | 0.52 | 0.83 | 0.63 |
| ETH | 2013 | 0.55 | 0.82 | 0.67 |
| ETH | 2014 | 0.58 | 0.84 | 0.69 |
| ETH | 2015 | 0.61 | 0.96 | 0.63 |
| GAB | 1980 | 0.51 | NA   | NA   |
| GAB | 1981 | 0.53 | NA   | NA   |
| GAB | 1982 | 0.54 | 0.48 | 1.14 |
| GAB | 1983 | 0.56 | 0.14 | 4.02 |
| GAB | 1984 | 0.59 | 0.31 | 1.90 |
| GAB | 1985 | 0.61 | 0.48 | 1.28 |
| GAB | 1986 | 0.64 | 0.48 | 1.34 |
| GAB | 1987 | 0.66 | 0.59 | 1.13 |
| GAB | 1988 | 0.68 | 0.65 | 1.05 |
| GAB | 1989 | 0.70 | 0.71 | 0.98 |
| GAB | 1990 | 0.70 | 0.78 | 0.90 |
| GAB | 1991 | 0.69 | 0.72 | 0.96 |
| GAB | 1992 | 0.67 | 0.66 | 1.02 |
| GAB | 1993 | 0.65 | 0.65 | 0.99 |
| GAB | 1994 | 0.61 | 0.59 | 1.04 |
| GAB | 1995 | 0.58 | 0.70 | 0.82 |
| GAB | 1996 | 0.53 | 0.61 | 0.87 |
| GAB | 1997 | 0.49 | 0.54 | 0.90 |
| GAB | 1998 | 0.45 | 0.37 | 1.21 |
| GAB | 1999 | 0.43 | 0.31 | 1.38 |
| GAB | 2000 | 0.42 | 0.10 | 4.23 |
| GAB | 2001 | 0.43 | 0.28 | 1.55 |
| GAB | 2002 | 0.45 | 0.33 | 1.37 |

|     |      |      |      |      |
|-----|------|------|------|------|
| GAB | 2003 | 0.48 | 0.40 | 1.20 |
| GAB | 2004 | 0.51 | 0.40 | 1.26 |
| GAB | 2005 | 0.54 | 0.40 | 1.35 |
| GAB | 2006 | 0.57 | 0.44 | 1.31 |
| GAB | 2007 | 0.61 | 0.81 | 0.76 |
| GAB | 2008 | 0.65 | 0.82 | 0.79 |
| GAB | 2009 | 0.68 | 0.76 | 0.89 |
| GAB | 2010 | 0.71 | 0.67 | 1.05 |
| GAB | 2011 | 0.73 | 0.75 | 0.98 |
| GAB | 2012 | 0.75 | 0.82 | 0.92 |
| GAB | 2013 | 0.77 | 0.79 | 0.98 |
| GAB | 2014 | 0.79 | 0.70 | 1.12 |
| GAB | 2015 | 0.80 | 0.80 | 1.00 |
| GHA | 1980 | 0.47 | 0.07 | 6.72 |
| GHA | 1981 | 0.49 | 0.22 | 2.21 |
| GHA | 1982 | 0.50 | 0.22 | 2.28 |
| GHA | 1983 | 0.52 | 0.23 | 2.24 |
| GHA | 1984 | 0.53 | 0.19 | 2.80 |
| GHA | 1985 | 0.55 | NA   | NA   |
| GHA | 1986 | 0.56 | 0.15 | 3.71 |
| GHA | 1987 | 0.57 | 0.18 | 3.14 |
| GHA | 1988 | 0.58 | 0.36 | 1.60 |
| GHA | 1989 | 0.59 | 0.35 | 1.68 |
| GHA | 1990 | 0.60 | 0.50 | 1.20 |
| GHA | 1991 | 0.61 | 0.40 | 1.53 |
| GHA | 1992 | 0.63 | 0.40 | 1.57 |
| GHA | 1993 | 0.65 | 0.48 | 1.35 |
| GHA | 1994 | 0.67 | 0.48 | 1.40 |
| GHA | 1995 | 0.69 | 0.51 | 1.36 |
| GHA | 1996 | 0.72 | 0.51 | 1.40 |
| GHA | 1997 | 0.74 | 0.60 | 1.23 |
| GHA | 1998 | 0.76 | 0.68 | 1.11 |
| GHA | 1999 | 0.77 | 0.72 | 1.07 |
| GHA | 2000 | 0.78 | 0.84 | 0.93 |
| GHA | 2001 | 0.79 | 0.76 | 1.05 |
| GHA | 2002 | 0.81 | 0.99 | 0.81 |
| GHA | 2003 | 0.82 | 0.80 | 1.02 |
| GHA | 2004 | 0.83 | 0.80 | 1.04 |
| GHA | 2005 | 0.85 | 0.84 | 1.01 |
| GHA | 2006 | 0.87 | 0.84 | 1.04 |
| GHA | 2007 | 0.89 | 0.94 | 0.95 |
| GHA | 2008 | 0.91 | 0.93 | 0.98 |
| GHA | 2009 | 0.92 | 0.94 | 0.98 |
| GHA | 2010 | 0.93 | 0.94 | 0.99 |
| GHA | 2011 | 0.94 | 0.91 | 1.03 |
| GHA | 2012 | 0.95 | 0.92 | 1.03 |
| GHA | 2013 | 0.95 | 0.90 | 1.06 |
| GHA | 2014 | 0.96 | 0.98 | 0.98 |
| GHA | 2015 | 0.96 | 0.89 | 1.08 |
| GIN | 1980 | 0.16 | NA   | NA   |

|     |      |      |      |      |
|-----|------|------|------|------|
| GIN | 1981 | 0.16 | NA   | NA   |
| GIN | 1982 | 0.16 | NA   | NA   |
| GIN | 1983 | 0.17 | NA   | NA   |
| GIN | 1984 | 0.17 | NA   | NA   |
| GIN | 1985 | 0.17 | NA   | NA   |
| GIN | 1986 | 0.18 | 0.02 | 8.84 |
| GIN | 1987 | 0.19 | NA   | NA   |
| GIN | 1988 | 0.21 | NA   | NA   |
| GIN | 1989 | 0.23 | 0.17 | 1.33 |
| GIN | 1990 | 0.25 | 0.20 | 1.24 |
| GIN | 1991 | 0.27 | 0.41 | 0.67 |
| GIN | 1992 | 0.30 | 0.52 | 0.58 |
| GIN | 1993 | 0.33 | NA   | NA   |
| GIN | 1994 | 0.36 | 0.73 | 0.49 |
| GIN | 1995 | 0.38 | 0.73 | 0.53 |
| GIN | 1996 | 0.40 | 0.48 | 0.84 |
| GIN | 1997 | 0.42 | 0.53 | 0.80 |
| GIN | 1998 | 0.44 | 0.56 | 0.78 |
| GIN | 1999 | 0.45 | 0.57 | 0.80 |
| GIN | 2000 | 0.47 | 0.57 | 0.82 |
| GIN | 2001 | 0.48 | 0.57 | 0.84 |
| GIN | 2002 | 0.49 | 0.58 | 0.85 |
| GIN | 2003 | 0.50 | 0.69 | 0.73 |
| GIN | 2004 | 0.51 | 0.69 | 0.74 |
| GIN | 2005 | 0.51 | 0.86 | 0.60 |
| GIN | 2006 | 0.52 | 0.89 | 0.58 |
| GIN | 2007 | 0.52 | 0.93 | 0.56 |
| GIN | 2008 | 0.52 | 0.70 | 0.75 |
| GIN | 2009 | 0.53 | 0.85 | 0.62 |
| GIN | 2010 | 0.54 | 0.90 | 0.60 |
| GIN | 2011 | 0.55 | 0.85 | 0.65 |
| GIN | 2012 | 0.57 | 0.99 | 0.57 |
| GIN | 2013 | 0.58 | 0.90 | 0.64 |
| GIN | 2014 | 0.58 | 0.60 | 0.97 |
| GIN | 2015 | 0.59 | 0.60 | 0.98 |
| GMB | 1980 | 0.68 | NA   | NA   |
| GMB | 1981 | 0.69 | 0.76 | 0.91 |
| GMB | 1982 | 0.70 | NA   | NA   |
| GMB | 1983 | 0.70 | 0.62 | 1.13 |
| GMB | 1984 | 0.71 | NA   | NA   |
| GMB | 1985 | 0.72 | 0.78 | 0.93 |
| GMB | 1986 | 0.74 | 0.73 | 1.01 |
| GMB | 1987 | 0.75 | 0.85 | 0.88 |
| GMB | 1988 | 0.76 | 0.82 | 0.93 |
| GMB | 1989 | 0.77 | 0.87 | 0.88 |
| GMB | 1990 | 0.78 | 0.92 | 0.84 |
| GMB | 1991 | 0.78 | 0.85 | 0.92 |
| GMB | 1992 | 0.78 | 0.85 | 0.92 |
| GMB | 1993 | 0.78 | 0.90 | 0.86 |
| GMB | 1994 | 0.78 | 0.93 | 0.83 |

|     |      |      |      |      |
|-----|------|------|------|------|
| GMB | 1995 | 0.77 | 0.96 | 0.81 |
| GMB | 1996 | 0.77 | 0.96 | 0.80 |
| GMB | 1997 | 0.77 | 0.96 | 0.80 |
| GMB | 1998 | 0.77 | 0.97 | 0.80 |
| GMB | 1999 | 0.78 | 0.88 | 0.88 |
| GMB | 2000 | 0.79 | 0.74 | 1.07 |
| GMB | 2001 | 0.81 | 0.96 | 0.84 |
| GMB | 2002 | 0.83 | 0.80 | 1.04 |
| GMB | 2003 | 0.85 | 0.90 | 0.94 |
| GMB | 2004 | 0.87 | 0.92 | 0.94 |
| GMB | 2005 | 0.88 | 0.89 | 0.99 |
| GMB | 2006 | 0.90 | 0.93 | 0.97 |
| GMB | 2007 | 0.91 | 0.94 | 0.97 |
| GMB | 2008 | 0.92 | 0.96 | 0.96 |
| GMB | 2009 | 0.93 | 0.98 | 0.95 |
| GMB | 2010 | 0.94 | 0.95 | 0.98 |
| GMB | 2011 | 0.94 | 0.96 | 0.98 |
| GMB | 2012 | 0.94 | 0.98 | 0.96 |
| GMB | 2013 | 0.95 | 0.98 | 0.97 |
| GMB | 2014 | 0.95 | 0.96 | 0.99 |
| GMB | 2015 | 0.95 | 0.97 | 0.98 |
| GNB | 1980 | 0.42 | NA   | NA   |
| GNB | 1981 | 0.43 | NA   | NA   |
| GNB | 1982 | 0.44 | NA   | NA   |
| GNB | 1983 | 0.44 | 0.09 | 4.90 |
| GNB | 1984 | 0.45 | 0.18 | 2.52 |
| GNB | 1985 | 0.47 | 0.18 | 2.61 |
| GNB | 1986 | 0.49 | 0.29 | 1.69 |
| GNB | 1987 | 0.51 | 0.55 | 0.93 |
| GNB | 1988 | 0.53 | 0.66 | 0.80 |
| GNB | 1989 | 0.55 | 0.60 | 0.91 |
| GNB | 1990 | 0.56 | 0.61 | 0.92 |
| GNB | 1991 | 0.57 | 0.63 | 0.91 |
| GNB | 1992 | 0.58 | 0.67 | 0.86 |
| GNB | 1993 | 0.58 | 0.65 | 0.89 |
| GNB | 1994 | 0.58 | 0.74 | 0.78 |
| GNB | 1995 | 0.57 | 0.45 | 1.27 |
| GNB | 1996 | 0.56 | 0.53 | 1.06 |
| GNB | 1997 | 0.55 | 0.63 | 0.88 |
| GNB | 1998 | 0.54 | NA   | NA   |
| GNB | 1999 | 0.53 | 0.06 | 8.88 |
| GNB | 2000 | 0.55 | NA   | NA   |
| GNB | 2001 | 0.57 | 0.47 | 1.21 |
| GNB | 2002 | 0.59 | 0.50 | 1.18 |
| GNB | 2003 | 0.61 | 0.77 | 0.79 |
| GNB | 2004 | 0.63 | 0.80 | 0.78 |
| GNB | 2005 | 0.65 | 0.80 | 0.81 |
| GNB | 2006 | 0.66 | 0.77 | 0.86 |
| GNB | 2007 | 0.68 | 0.96 | 0.71 |
| GNB | 2008 | 0.70 | 0.79 | 0.88 |

|     |      |      |      |       |
|-----|------|------|------|-------|
| GNB | 2009 | 0.72 | 0.82 | 0.88  |
| GNB | 2010 | 0.74 | 0.86 | 0.86  |
| GNB | 2011 | 0.76 | 0.89 | 0.86  |
| GNB | 2012 | 0.78 | 0.90 | 0.86  |
| GNB | 2013 | 0.79 | 0.96 | 0.82  |
| GNB | 2014 | 0.79 | 0.83 | 0.95  |
| GNB | 2015 | 0.80 | 0.90 | 0.88  |
| GNQ | 1980 | 0.47 | NA   | NA    |
| GNQ | 1981 | 0.48 | NA   | NA    |
| GNQ | 1982 | 0.49 | NA   | NA    |
| GNQ | 1983 | 0.50 | NA   | NA    |
| GNQ | 1984 | 0.50 | NA   | NA    |
| GNQ | 1985 | 0.51 | 0.03 | 16.84 |
| GNQ | 1986 | 0.51 | 0.03 | 17.14 |
| GNQ | 1987 | 0.53 | NA   | NA    |
| GNQ | 1988 | 0.54 | 0.18 | 2.99  |
| GNQ | 1989 | 0.54 | 0.14 | 3.88  |
| GNQ | 1990 | 0.54 | NA   | NA    |
| GNQ | 1991 | 0.53 | NA   | NA    |
| GNQ | 1992 | 0.51 | 0.64 | 0.80  |
| GNQ | 1993 | 0.48 | 0.60 | 0.80  |
| GNQ | 1994 | 0.44 | NA   | NA    |
| GNQ | 1995 | 0.40 | 0.64 | 0.62  |
| GNQ | 1996 | 0.36 | 0.64 | 0.56  |
| GNQ | 1997 | 0.33 | 0.81 | 0.41  |
| GNQ | 1998 | 0.30 | NA   | NA    |
| GNQ | 1999 | 0.29 | 0.40 | 0.72  |
| GNQ | 2000 | 0.29 | 0.32 | 0.90  |
| GNQ | 2001 | 0.29 | 0.32 | 0.92  |
| GNQ | 2002 | 0.31 | 0.65 | 0.48  |
| GNQ | 2003 | 0.33 | 0.41 | 0.80  |
| GNQ | 2004 | 0.35 | 0.46 | 0.76  |
| GNQ | 2005 | 0.37 | 0.34 | 1.09  |
| GNQ | 2006 | 0.40 | 0.34 | 1.16  |
| GNQ | 2007 | 0.42 | 0.41 | 1.03  |
| GNQ | 2008 | 0.45 | 0.74 | 0.61  |
| GNQ | 2009 | 0.47 | 0.74 | 0.64  |
| GNQ | 2010 | 0.49 | 0.44 | 1.11  |
| GNQ | 2011 | 0.51 | 0.54 | 0.94  |
| GNQ | 2012 | 0.52 | 0.41 | 1.27  |
| GNQ | 2013 | 0.54 | 0.24 | 2.23  |
| GNQ | 2014 | 0.55 | 0.45 | 1.23  |
| GNQ | 2015 | 0.57 | 0.17 | 3.37  |
| GUY | 1980 | 0.39 | 0.36 | 1.09  |
| GUY | 1981 | 0.41 | 0.41 | 1.00  |
| GUY | 1982 | 0.44 | 0.58 | 0.75  |
| GUY | 1983 | 0.46 | 0.58 | 0.80  |
| GUY | 1984 | 0.49 | 0.70 | 0.70  |
| GUY | 1985 | 0.52 | 0.75 | 0.70  |
| GUY | 1986 | 0.55 | 0.64 | 0.87  |

|     |      |      |      |      |
|-----|------|------|------|------|
| GUY | 1987 | 0.59 | 0.67 | 0.88 |
| GUY | 1988 | 0.62 | 0.64 | 0.97 |
| GUY | 1989 | 0.66 | 0.77 | 0.85 |
| GUY | 1990 | 0.69 | 0.82 | 0.84 |
| GUY | 1991 | 0.73 | 0.81 | 0.90 |
| GUY | 1992 | 0.76 | 0.79 | 0.96 |
| GUY | 1993 | 0.79 | 0.93 | 0.85 |
| GUY | 1994 | 0.82 | 0.90 | 0.91 |
| GUY | 1995 | 0.83 | 0.86 | 0.97 |
| GUY | 1996 | 0.85 | 0.83 | 1.02 |
| GUY | 1997 | 0.86 | 0.88 | 0.98 |
| GUY | 1998 | 0.87 | 0.90 | 0.96 |
| GUY | 1999 | 0.87 | 0.83 | 1.04 |
| GUY | 2000 | 0.87 | 0.88 | 0.98 |
| GUY | 2001 | 0.86 | 0.85 | 1.02 |
| GUY | 2002 | 0.86 | 0.91 | 0.95 |
| GUY | 2003 | 0.86 | 0.90 | 0.95 |
| GUY | 2004 | 0.85 | 0.91 | 0.94 |
| GUY | 2005 | 0.85 | 0.93 | 0.91 |
| GUY | 2006 | 0.85 | 0.93 | 0.91 |
| GUY | 2007 | 0.85 | 0.94 | 0.91 |
| GUY | 2008 | 0.85 | 0.93 | 0.92 |
| GUY | 2009 | 0.86 | 0.98 | 0.88 |
| GUY | 2010 | 0.87 | 0.95 | 0.91 |
| GUY | 2011 | 0.88 | 0.93 | 0.94 |
| GUY | 2012 | 0.89 | 0.97 | 0.91 |
| GUY | 2013 | 0.89 | 0.98 | 0.91 |
| GUY | 2014 | 0.90 | 0.98 | 0.92 |
| GUY | 2015 | 0.91 | 0.95 | 0.96 |
| KEN | 1980 | 0.81 | NA   | NA   |
| KEN | 1981 | 0.82 | NA   | NA   |
| KEN | 1982 | 0.83 | NA   | NA   |
| KEN | 1983 | 0.84 | NA   | NA   |
| KEN | 1984 | 0.85 | NA   | NA   |
| KEN | 1985 | 0.86 | 0.70 | 1.22 |
| KEN | 1986 | 0.86 | 0.72 | 1.19 |
| KEN | 1987 | 0.86 | NA   | NA   |
| KEN | 1988 | 0.85 | 0.30 | 2.84 |
| KEN | 1989 | 0.84 | 0.41 | 2.06 |
| KEN | 1990 | 0.83 | 0.42 | 1.99 |
| KEN | 1991 | 0.82 | 0.41 | 2.01 |
| KEN | 1992 | 0.81 | 0.40 | 2.03 |
| KEN | 1993 | 0.80 | 0.42 | 1.91 |
| KEN | 1994 | 0.79 | 0.50 | 1.58 |
| KEN | 1995 | 0.77 | 0.84 | 0.92 |
| KEN | 1996 | 0.76 | 0.77 | 0.98 |
| KEN | 1997 | 0.74 | 0.36 | 2.06 |
| KEN | 1998 | 0.74 | 0.64 | 1.16 |
| KEN | 1999 | 0.75 | 0.79 | 0.95 |
| KEN | 2000 | 0.77 | 0.63 | 1.22 |

|     |      |      |      |      |
|-----|------|------|------|------|
| KEN | 2001 | 0.80 | 0.80 | 0.99 |
| KEN | 2002 | 0.82 | 0.84 | 0.98 |
| KEN | 2003 | 0.86 | 0.73 | 1.17 |
| KEN | 2004 | 0.88 | 0.73 | 1.21 |
| KEN | 2005 | 0.90 | 0.76 | 1.19 |
| KEN | 2006 | 0.92 | 0.80 | 1.14 |
| KEN | 2007 | 0.92 | 0.81 | 1.14 |
| KEN | 2008 | 0.92 | 0.85 | 1.08 |
| KEN | 2009 | 0.91 | 0.75 | 1.22 |
| KEN | 2010 | 0.91 | 0.83 | 1.09 |
| KEN | 2011 | 0.90 | 0.88 | 1.02 |
| KEN | 2012 | 0.89 | 0.83 | 1.08 |
| KEN | 2013 | 0.89 | 0.84 | 1.06 |
| KEN | 2014 | 0.89 | 0.81 | 1.10 |
| KEN | 2015 | 0.90 | 0.78 | 1.15 |
| LBR | 1980 | 0.29 | NA   | NA   |
| LBR | 1981 | 0.29 | 0.39 | 0.76 |
| LBR | 1982 | 0.30 | NA   | NA   |
| LBR | 1983 | 0.30 | 0.23 | 1.29 |
| LBR | 1984 | 0.30 | NA   | NA   |
| LBR | 1985 | 0.30 | NA   | NA   |
| LBR | 1986 | 0.30 | 0.15 | 2.01 |
| LBR | 1987 | 0.31 | 0.19 | 1.62 |
| LBR | 1988 | 0.32 | NA   | NA   |
| LBR | 1989 | 0.33 | NA   | NA   |
| LBR | 1990 | 0.34 | NA   | NA   |
| LBR | 1991 | 0.35 | NA   | NA   |
| LBR | 1992 | 0.36 | NA   | NA   |
| LBR | 1993 | 0.37 | NA   | NA   |
| LBR | 1994 | 0.38 | NA   | NA   |
| LBR | 1995 | 0.38 | 0.45 | 0.85 |
| LBR | 1996 | 0.38 | 0.45 | 0.85 |
| LBR | 1997 | 0.38 | 0.26 | 1.47 |
| LBR | 1998 | 0.39 | 0.19 | 2.03 |
| LBR | 1999 | 0.40 | 0.23 | 1.74 |
| LBR | 2000 | 0.41 | 0.48 | 0.86 |
| LBR | 2001 | 0.42 | 0.62 | 0.68 |
| LBR | 2002 | 0.43 | 0.51 | 0.85 |
| LBR | 2003 | 0.44 | 0.38 | 1.17 |
| LBR | 2004 | 0.46 | 0.31 | 1.49 |
| LBR | 2005 | 0.49 | 0.87 | 0.56 |
| LBR | 2006 | 0.52 | 0.88 | 0.59 |
| LBR | 2007 | 0.55 | 0.88 | 0.63 |
| LBR | 2008 | 0.59 | 0.92 | 0.64 |
| LBR | 2009 | 0.61 | 0.92 | 0.67 |
| LBR | 2010 | 0.64 | 0.75 | 0.85 |
| LBR | 2011 | 0.66 | 0.77 | 0.86 |
| LBR | 2012 | 0.68 | 0.93 | 0.74 |
| LBR | 2013 | 0.70 | 0.89 | 0.79 |
| LBR | 2014 | 0.72 | 0.63 | 1.14 |

|     |      |      |      |      |
|-----|------|------|------|------|
| LBR | 2015 | 0.73 | 0.65 | 1.12 |
| MLI | 1980 | 0.26 | NA   | NA   |
| MLI | 1981 | 0.27 | NA   | NA   |
| MLI | 1982 | 0.27 | NA   | NA   |
| MLI | 1983 | 0.27 | NA   | NA   |
| MLI | 1984 | 0.27 | NA   | NA   |
| MLI | 1985 | 0.27 | 0.08 | 3.40 |
| MLI | 1986 | 0.27 | 0.03 | 9.13 |
| MLI | 1987 | 0.28 | 0.08 | 3.51 |
| MLI | 1988 | 0.29 | 0.18 | 1.62 |
| MLI | 1989 | 0.30 | 0.26 | 1.17 |
| MLI | 1990 | 0.32 | 0.42 | 0.76 |
| MLI | 1991 | 0.33 | 0.34 | 0.97 |
| MLI | 1992 | 0.34 | 0.38 | 0.91 |
| MLI | 1993 | 0.36 | 0.46 | 0.78 |
| MLI | 1994 | 0.37 | 0.39 | 0.95 |
| MLI | 1995 | 0.38 | 0.49 | 0.78 |
| MLI | 1996 | 0.39 | 0.53 | 0.74 |
| MLI | 1997 | 0.41 | 0.52 | 0.78 |
| MLI | 1998 | 0.42 | 0.56 | 0.76 |
| MLI | 1999 | 0.45 | 0.47 | 0.95 |
| MLI | 2000 | 0.48 | 0.54 | 0.89 |
| MLI | 2001 | 0.52 | 0.61 | 0.85 |
| MLI | 2002 | 0.56 | 0.74 | 0.76 |
| MLI | 2003 | 0.60 | 0.79 | 0.76 |
| MLI | 2004 | 0.64 | 0.86 | 0.74 |
| MLI | 2005 | 0.66 | 0.95 | 0.69 |
| MLI | 2006 | 0.67 | 0.95 | 0.71 |
| MLI | 2007 | 0.67 | 0.91 | 0.74 |
| MLI | 2008 | 0.67 | 0.99 | 0.68 |
| MLI | 2009 | 0.66 | 0.89 | 0.74 |
| MLI | 2010 | 0.65 | 0.92 | 0.71 |
| MLI | 2011 | 0.64 | 0.88 | 0.73 |
| MLI | 2012 | 0.64 | 0.90 | 0.72 |
| MLI | 2013 | 0.65 | 0.76 | 0.85 |
| MLI | 2014 | 0.65 | 0.81 | 0.80 |
| MLI | 2015 | 0.65 | 0.90 | 0.72 |
| MRT | 1980 | 0.20 | NA   | NA   |
| MRT | 1981 | 0.20 | 0.18 | 1.12 |
| MRT | 1982 | 0.21 | NA   | NA   |
| MRT | 1983 | 0.21 | NA   | NA   |
| MRT | 1984 | 0.21 | NA   | NA   |
| MRT | 1985 | 0.22 | NA   | NA   |
| MRT | 1986 | 0.22 | 0.11 | 2.00 |
| MRT | 1987 | 0.23 | 0.10 | 2.28 |
| MRT | 1988 | 0.24 | 0.24 | 1.00 |
| MRT | 1989 | 0.25 | 0.28 | 0.91 |
| MRT | 1990 | 0.27 | 0.33 | 0.81 |
| MRT | 1991 | 0.28 | 0.29 | 0.98 |
| MRT | 1992 | 0.30 | 0.39 | 0.77 |



|     |      |      |      |      |
|-----|------|------|------|------|
| MRT | 1993 | 0.32 | 0.44 | 0.72 |
| MRT | 1994 | 0.33 | 0.50 | 0.66 |
| MRT | 1995 | 0.34 | 0.50 | 0.69 |
| MRT | 1996 | 0.36 | 0.50 | 0.71 |
| MRT | 1997 | 0.37 | 0.28 | 1.31 |
| MRT | 1998 | 0.38 | NA   | NA   |
| MRT | 1999 | 0.41 | 0.26 | 1.57 |
| MRT | 2000 | 0.44 | 0.31 | 1.41 |
| MRT | 2001 | 0.47 | 0.61 | 0.77 |
| MRT | 2002 | 0.51 | 0.83 | 0.61 |
| MRT | 2003 | 0.54 | 0.76 | 0.71 |
| MRT | 2004 | 0.56 | 0.70 | 0.80 |
| MRT | 2005 | 0.59 | 0.71 | 0.83 |
| MRT | 2006 | 0.61 | 0.68 | 0.90 |
| MRT | 2007 | 0.64 | 0.75 | 0.85 |
| MRT | 2008 | 0.66 | 0.74 | 0.89 |
| MRT | 2009 | 0.68 | 0.64 | 1.06 |
| MRT | 2010 | 0.70 | 0.64 | 1.09 |
| MRT | 2011 | 0.72 | 0.75 | 0.96 |
| MRT | 2012 | 0.74 | 0.80 | 0.92 |
| MRT | 2013 | 0.75 | 0.80 | 0.94 |
| MRT | 2014 | 0.76 | 0.84 | 0.91 |
| MRT | 2015 | 0.77 | 0.73 | 1.05 |
| NER | 1980 | 0.16 | NA   | NA   |
| NER | 1981 | 0.16 | 0.06 | 2.62 |
| NER | 1982 | 0.16 | NA   | NA   |
| NER | 1983 | 0.17 | NA   | NA   |
| NER | 1984 | 0.17 | NA   | NA   |
| NER | 1985 | 0.18 | NA   | NA   |
| NER | 1986 | 0.19 | 0.05 | 3.78 |
| NER | 1987 | 0.20 | NA   | NA   |
| NER | 1988 | 0.22 | 0.09 | 2.39 |
| NER | 1989 | 0.23 | 0.13 | 1.79 |
| NER | 1990 | 0.25 | 0.35 | 0.72 |
| NER | 1991 | 0.27 | 0.39 | 0.70 |
| NER | 1992 | 0.29 | 0.37 | 0.77 |
| NER | 1993 | 0.29 | 0.38 | 0.77 |
| NER | 1994 | 0.30 | 0.39 | 0.76 |
| NER | 1995 | 0.30 | 0.42 | 0.70 |
| NER | 1996 | 0.29 | 0.32 | 0.90 |
| NER | 1997 | 0.28 | 0.33 | 0.85 |
| NER | 1998 | 0.27 | 0.25 | 1.10 |
| NER | 1999 | 0.28 | 0.24 | 1.15 |
| NER | 2000 | 0.29 | 0.25 | 1.14 |
| NER | 2001 | 0.30 | 0.31 | 0.97 |
| NER | 2002 | 0.32 | 0.21 | 1.54 |
| NER | 2003 | 0.36 | 0.52 | 0.68 |
| NER | 2004 | 0.40 | 0.62 | 0.64 |
| NER | 2005 | 0.45 | 0.89 | 0.51 |
| NER | 2006 | 0.51 | 0.99 | 0.51 |

|     |      |      |      |      |
|-----|------|------|------|------|
| NER | 2007 | 0.55 | 0.78 | 0.71 |
| NER | 2008 | 0.60 | 0.89 | 0.68 |
| NER | 2009 | 0.65 | 0.93 | 0.69 |
| NER | 2010 | 0.68 | 0.92 | 0.74 |
| NER | 2011 | 0.72 | 0.97 | 0.74 |
| NER | 2012 | 0.74 | 0.96 | 0.77 |
| NER | 2013 | 0.76 | 0.92 | 0.83 |
| NER | 2014 | 0.77 | 0.93 | 0.83 |
| NER | 2015 | 0.78 | 0.90 | 0.87 |
| NGA | 1980 | 0.22 | NA   | NA   |
| NGA | 1981 | 0.23 | NA   | NA   |
| NGA | 1982 | 0.24 | NA   | NA   |
| NGA | 1983 | 0.25 | NA   | NA   |
| NGA | 1984 | 0.26 | 0.05 | 5.13 |
| NGA | 1985 | 0.27 | 0.09 | 2.98 |
| NGA | 1986 | 0.28 | 0.16 | 1.77 |
| NGA | 1987 | 0.29 | 0.21 | 1.40 |
| NGA | 1988 | 0.30 | 0.36 | 0.85 |
| NGA | 1989 | 0.31 | 0.47 | 0.66 |
| NGA | 1990 | 0.31 | 0.56 | 0.56 |
| NGA | 1991 | 0.31 | 0.39 | 0.80 |
| NGA | 1992 | 0.31 | 0.43 | 0.72 |
| NGA | 1993 | 0.30 | 0.29 | 1.05 |
| NGA | 1994 | 0.30 | 0.44 | 0.68 |
| NGA | 1995 | 0.29 | 0.34 | 0.84 |
| NGA | 1996 | 0.28 | 0.26 | 1.06 |
| NGA | 1997 | 0.26 | 0.21 | 1.26 |
| NGA | 1998 | 0.26 | 0.21 | 1.24 |
| NGA | 1999 | 0.26 | NA   | NA   |
| NGA | 2000 | 0.27 | 0.38 | 0.70 |
| NGA | 2001 | 0.27 | NA   | NA   |
| NGA | 2002 | 0.28 | NA   | NA   |
| NGA | 2003 | 0.29 | NA   | NA   |
| NGA | 2004 | 0.30 | 0.38 | 0.78 |
| NGA | 2005 | 0.31 | 0.38 | 0.81 |
| NGA | 2006 | 0.32 | 0.72 | 0.44 |
| NGA | 2007 | 0.33 | 0.69 | 0.48 |
| NGA | 2008 | 0.35 | 0.57 | 0.61 |
| NGA | 2009 | 0.36 | 0.71 | 0.51 |
| NGA | 2010 | 0.37 | 0.74 | 0.50 |
| NGA | 2011 | 0.38 | 0.61 | 0.62 |
| NGA | 2012 | 0.39 | 0.57 | 0.68 |
| NGA | 2013 | 0.40 | 0.65 | 0.62 |
| NGA | 2014 | 0.42 | 0.70 | 0.60 |
| NGA | 2015 | 0.43 | 0.74 | 0.58 |
| PAN | 1980 | 0.56 | 0.70 | 0.81 |
| PAN | 1981 | 0.58 | 0.72 | 0.80 |
| PAN | 1982 | 0.59 | 0.60 | 0.99 |
| PAN | 1983 | 0.61 | 0.85 | 0.72 |
| PAN | 1984 | 0.63 | 0.66 | 0.96 |

|     |      |      |      |      |
|-----|------|------|------|------|
| PAN | 1985 | 0.66 | 0.73 | 0.90 |
| PAN | 1986 | 0.68 | 0.71 | 0.96 |
| PAN | 1987 | 0.71 | 0.73 | 0.97 |
| PAN | 1988 | 0.73 | 0.71 | 1.03 |
| PAN | 1989 | 0.76 | 0.70 | 1.08 |
| PAN | 1990 | 0.78 | 0.86 | 0.91 |
| PAN | 1991 | 0.80 | 0.82 | 0.98 |
| PAN | 1992 | 0.82 | 0.76 | 1.08 |
| PAN | 1993 | 0.84 | 0.82 | 1.02 |
| PAN | 1994 | 0.85 | 0.83 | 1.02 |
| PAN | 1995 | 0.85 | 0.86 | 0.99 |
| PAN | 1996 | 0.86 | 0.92 | 0.93 |
| PAN | 1997 | 0.86 | 0.95 | 0.91 |
| PAN | 1998 | 0.86 | 0.98 | 0.88 |
| PAN | 1999 | 0.85 | 0.92 | 0.92 |
| PAN | 2000 | 0.84 | 0.98 | 0.85 |
| PAN | 2001 | 0.82 | 0.99 | 0.83 |
| PAN | 2002 | 0.80 | 0.99 | 0.81 |
| PAN | 2003 | 0.78 | 0.98 | 0.80 |
| PAN | 2004 | 0.76 | 0.99 | 0.77 |
| PAN | 2005 | 0.74 | 0.88 | 0.84 |
| PAN | 2006 | 0.73 | 0.99 | 0.74 |
| PAN | 2007 | 0.72 | 0.85 | 0.84 |
| PAN | 2008 | 0.71 | 0.86 | 0.82 |
| PAN | 2009 | 0.71 | 0.85 | 0.83 |
| PAN | 2010 | 0.71 | 0.94 | 0.75 |
| PAN | 2011 | 0.71 | 0.87 | 0.82 |
| PAN | 2012 | 0.71 | 0.85 | 0.84 |
| PAN | 2013 | 0.72 | 0.80 | 0.90 |
| PAN | 2014 | 0.73 | 0.80 | 0.92 |
| PAN | 2015 | 0.75 | 0.73 | 1.03 |
| PER | 1980 | 0.31 | 0.16 | 1.95 |
| PER | 1981 | 0.34 | 0.20 | 1.70 |
| PER | 1982 | 0.37 | 0.23 | 1.62 |
| PER | 1983 | 0.41 | 0.23 | 1.78 |
| PER | 1984 | 0.45 | 0.28 | 1.61 |
| PER | 1985 | 0.49 | 0.48 | 1.03 |
| PER | 1986 | 0.54 | 0.50 | 1.08 |
| PER | 1987 | 0.58 | 0.43 | 1.35 |
| PER | 1988 | 0.62 | 0.61 | 1.02 |
| PER | 1989 | 0.66 | 0.58 | 1.13 |
| PER | 1990 | 0.69 | 0.72 | 0.96 |
| PER | 1991 | 0.72 | 0.71 | 1.01 |
| PER | 1992 | 0.75 | 0.83 | 0.90 |
| PER | 1993 | 0.78 | 0.87 | 0.89 |
| PER | 1994 | 0.80 | 0.87 | 0.92 |
| PER | 1995 | 0.82 | 0.95 | 0.86 |
| PER | 1996 | 0.84 | 0.99 | 0.85 |
| PER | 1997 | 0.85 | 0.98 | 0.87 |
| PER | 1998 | 0.85 | 0.98 | 0.87 |

|     |      |      |      |      |
|-----|------|------|------|------|
| PER | 1999 | 0.84 | 0.99 | 0.85 |
| PER | 2000 | 0.83 | 0.98 | 0.85 |
| PER | 2001 | 0.81 | 0.90 | 0.90 |
| PER | 2002 | 0.80 | 0.95 | 0.84 |
| PER | 2003 | 0.79 | 0.94 | 0.84 |
| PER | 2004 | 0.78 | 0.91 | 0.85 |
| PER | 2005 | 0.77 | 0.89 | 0.86 |
| PER | 2006 | 0.77 | 0.94 | 0.82 |
| PER | 2007 | 0.77 | 0.99 | 0.78 |
| PER | 2008 | 0.79 | 0.99 | 0.79 |
| PER | 2009 | 0.80 | 0.92 | 0.87 |
| PER | 2010 | 0.82 | 0.93 | 0.88 |
| PER | 2011 | 0.84 | 0.91 | 0.92 |
| PER | 2012 | 0.85 | 0.95 | 0.90 |
| PER | 2013 | 0.87 | 0.88 | 0.98 |
| PER | 2014 | 0.88 | 0.88 | 1.00 |
| PER | 2015 | 0.89 | 0.90 | 0.99 |
| PRY | 1980 | 0.50 | 0.17 | 2.95 |
| PRY | 1981 | 0.52 | 0.28 | 1.86 |
| PRY | 1982 | 0.54 | 0.34 | 1.59 |
| PRY | 1983 | 0.56 | 0.44 | 1.27 |
| PRY | 1984 | 0.58 | 0.67 | 0.87 |
| PRY | 1985 | 0.60 | 0.57 | 1.05 |
| PRY | 1986 | 0.62 | 0.53 | 1.17 |
| PRY | 1987 | 0.64 | 0.58 | 1.10 |
| PRY | 1988 | 0.66 | 0.56 | 1.17 |
| PRY | 1989 | 0.68 | 0.61 | 1.11 |
| PRY | 1990 | 0.71 | 0.80 | 0.88 |
| PRY | 1991 | 0.73 | 0.80 | 0.91 |
| PRY | 1992 | 0.76 | 0.87 | 0.87 |
| PRY | 1993 | 0.78 | 0.78 | 1.00 |
| PRY | 1994 | 0.80 | 0.81 | 0.98 |
| PRY | 1995 | 0.82 | 0.80 | 1.02 |
| PRY | 1996 | 0.83 | 0.80 | 1.04 |
| PRY | 1997 | 0.84 | 0.82 | 1.03 |
| PRY | 1998 | 0.85 | 0.81 | 1.06 |
| PRY | 1999 | 0.86 | 0.77 | 1.12 |
| PRY | 2000 | 0.87 | 0.80 | 1.09 |
| PRY | 2001 | 0.88 | 0.89 | 0.98 |
| PRY | 2002 | 0.88 | 0.87 | 1.01 |
| PRY | 2003 | 0.89 | 0.86 | 1.03 |
| PRY | 2004 | 0.89 | 0.88 | 1.02 |
| PRY | 2005 | 0.90 | 0.87 | 1.03 |
| PRY | 2006 | 0.90 | 0.85 | 1.06 |
| PRY | 2007 | 0.91 | 0.78 | 1.16 |
| PRY | 2008 | 0.91 | 0.76 | 1.20 |
| PRY | 2009 | 0.92 | 0.72 | 1.27 |
| PRY | 2010 | 0.92 | 0.76 | 1.21 |
| PRY | 2011 | 0.92 | 0.76 | 1.21 |
| PRY | 2012 | 0.93 | 0.74 | 1.25 |

|     |      |      |      |      |
|-----|------|------|------|------|
| PRY | 2013 | 0.93 | 0.73 | 1.27 |
| PRY | 2014 | 0.93 | 0.74 | 1.26 |
| PRY | 2015 | 0.94 | 0.80 | 1.17 |
| RWA | 1980 | 0.63 | NA   | NA   |
| RWA | 1981 | 0.64 | 0.17 | 3.79 |
| RWA | 1982 | 0.67 | NA   | NA   |
| RWA | 1983 | 0.69 | 0.59 | 1.17 |
| RWA | 1984 | 0.71 | NA   | NA   |
| RWA | 1985 | 0.73 | 0.50 | 1.47 |
| RWA | 1986 | 0.76 | 0.77 | 0.98 |
| RWA | 1987 | 0.77 | 0.79 | 0.98 |
| RWA | 1988 | 0.79 | 0.78 | 1.01 |
| RWA | 1989 | 0.80 | 0.68 | 1.18 |
| RWA | 1990 | 0.81 | 0.57 | 1.42 |
| RWA | 1991 | 0.82 | 0.89 | 0.92 |
| RWA | 1992 | 0.82 | 0.85 | 0.97 |
| RWA | 1993 | 0.83 | 0.83 | 0.99 |
| RWA | 1994 | 0.82 | NA   | NA   |
| RWA | 1995 | 0.82 | 0.90 | 0.92 |
| RWA | 1996 | 0.82 | 0.98 | 0.84 |
| RWA | 1997 | 0.82 | 0.77 | 1.06 |
| RWA | 1998 | 0.82 | NA   | NA   |
| RWA | 1999 | 0.82 | 0.85 | 0.97 |
| RWA | 2000 | 0.83 | 0.90 | 0.92 |
| RWA | 2001 | 0.84 | 0.77 | 1.09 |
| RWA | 2002 | 0.86 | 0.88 | 0.98 |
| RWA | 2003 | 0.88 | 0.96 | 0.91 |
| RWA | 2004 | 0.89 | 0.89 | 1.00 |
| RWA | 2005 | 0.91 | 0.95 | 0.96 |
| RWA | 2006 | 0.93 | 0.99 | 0.93 |
| RWA | 2007 | 0.94 | 0.97 | 0.97 |
| RWA | 2008 | 0.95 | 0.97 | 0.98 |
| RWA | 2009 | 0.96 | 0.97 | 0.99 |
| RWA | 2010 | 0.96 | 0.97 | 0.99 |
| RWA | 2011 | 0.97 | 0.97 | 1.00 |
| RWA | 2012 | 0.97 | 0.99 | 0.98 |
| RWA | 2013 | 0.98 | 0.99 | 0.99 |
| RWA | 2014 | 0.98 | 0.98 | 1.00 |
| RWA | 2015 | 0.98 | 0.99 | 0.99 |
| SDN | 1980 | 0.05 | 0.01 | 5.38 |
| SDN | 1981 | 0.06 | 0.01 | 5.80 |
| SDN | 1982 | 0.06 | 0.02 | 3.24 |
| SDN | 1983 | 0.07 | 0.03 | 2.46 |
| SDN | 1984 | 0.09 | 0.04 | 2.15 |
| SDN | 1985 | 0.10 | 0.08 | 1.27 |
| SDN | 1986 | 0.12 | 0.14 | 0.87 |
| SDN | 1987 | 0.15 | 0.27 | 0.54 |
| SDN | 1988 | 0.17 | 0.40 | 0.43 |
| SDN | 1989 | 0.21 | 0.40 | 0.51 |
| SDN | 1990 | 0.24 | 0.62 | 0.39 |

|     |      |      |      |      |
|-----|------|------|------|------|
| SDN | 1991 | 0.28 | 0.63 | 0.44 |
| SDN | 1992 | 0.31 | 0.53 | 0.59 |
| SDN | 1993 | 0.35 | 0.51 | 0.69 |
| SDN | 1994 | 0.39 | 0.69 | 0.56 |
| SDN | 1995 | 0.42 | 0.72 | 0.59 |
| SDN | 1996 | 0.45 | 0.79 | 0.57 |
| SDN | 1997 | 0.46 | 0.78 | 0.59 |
| SDN | 1998 | 0.47 | 0.70 | 0.67 |
| SDN | 1999 | 0.47 | 0.79 | 0.60 |
| SDN | 2000 | 0.47 | 0.65 | 0.73 |
| SDN | 2001 | 0.48 | 0.71 | 0.67 |
| SDN | 2002 | 0.48 | 0.64 | 0.75 |
| SDN | 2003 | 0.49 | 0.74 | 0.67 |
| SDN | 2004 | 0.51 | 0.79 | 0.64 |
| SDN | 2005 | 0.52 | 0.83 | 0.63 |
| SDN | 2006 | 0.54 | 0.85 | 0.64 |
| SDN | 2007 | 0.57 | 0.91 | 0.62 |
| SDN | 2008 | 0.59 | 0.93 | 0.63 |
| SDN | 2009 | 0.61 | 0.91 | 0.67 |
| SDN | 2010 | 0.63 | 0.95 | 0.67 |
| SDN | 2011 | 0.66 | 0.93 | 0.70 |
| SDN | 2012 | 0.67 | 0.92 | 0.73 |
| SDN | 2013 | 0.69 | 0.93 | 0.75 |
| SDN | 2014 | 0.71 | 0.94 | 0.76 |
| SDN | 2015 | 0.72 | 0.93 | 0.78 |
| SEN | 1980 | 0.38 | NA   | NA   |
| SEN | 1981 | 0.38 | NA   | NA   |
| SEN | 1982 | 0.39 | NA   | NA   |
| SEN | 1983 | 0.40 | NA   | NA   |
| SEN | 1984 | 0.42 | NA   | NA   |
| SEN | 1985 | 0.45 | 0.54 | 0.83 |
| SEN | 1986 | 0.48 | NA   | NA   |
| SEN | 1987 | 0.51 | NA   | NA   |
| SEN | 1988 | 0.54 | 0.59 | 0.91 |
| SEN | 1989 | 0.56 | 0.71 | 0.79 |
| SEN | 1990 | 0.58 | 0.66 | 0.88 |
| SEN | 1991 | 0.59 | 0.51 | 1.16 |
| SEN | 1992 | 0.60 | 0.46 | 1.30 |
| SEN | 1993 | 0.61 | 0.52 | 1.17 |
| SEN | 1994 | 0.62 | 0.57 | 1.08 |
| SEN | 1995 | 0.63 | 0.80 | 0.79 |
| SEN | 1996 | 0.64 | 0.70 | 0.91 |
| SEN | 1997 | 0.64 | 0.59 | 1.09 |
| SEN | 1998 | 0.65 | 0.59 | 1.11 |
| SEN | 1999 | 0.67 | 0.60 | 1.11 |
| SEN | 2000 | 0.69 | 0.52 | 1.32 |
| SEN | 2001 | 0.71 | 0.52 | 1.37 |
| SEN | 2002 | 0.74 | 0.60 | 1.23 |
| SEN | 2003 | 0.76 | 0.73 | 1.04 |
| SEN | 2004 | 0.78 | 0.87 | 0.89 |

|     |      |      |      |      |
|-----|------|------|------|------|
| SEN | 2005 | 0.79 | 0.84 | 0.95 |
| SEN | 2006 | 0.81 | 0.89 | 0.91 |
| SEN | 2007 | 0.82 | 0.94 | 0.87 |
| SEN | 2008 | 0.83 | 0.88 | 0.94 |
| SEN | 2009 | 0.84 | 0.86 | 0.97 |
| SEN | 2010 | 0.84 | 0.70 | 1.20 |
| SEN | 2011 | 0.85 | 0.83 | 1.03 |
| SEN | 2012 | 0.86 | 0.83 | 1.03 |
| SEN | 2013 | 0.86 | 0.92 | 0.94 |
| SEN | 2014 | 0.87 | 0.89 | 0.98 |
| SEN | 2015 | 0.87 | 0.89 | 0.98 |
| SLE | 1980 | 0.42 | 0.13 | 3.23 |
| SLE | 1981 | 0.44 | 0.15 | 2.90 |
| SLE | 1982 | 0.46 | 0.10 | 4.56 |
| SLE | 1983 | 0.48 | 0.24 | 2.00 |
| SLE | 1984 | 0.51 | 0.21 | 2.42 |
| SLE | 1985 | 0.54 | NA   | NA   |
| SLE | 1986 | 0.56 | NA   | NA   |
| SLE | 1987 | 0.59 | NA   | NA   |
| SLE | 1988 | 0.61 | 0.22 | 2.75 |
| SLE | 1989 | 0.62 | NA   | NA   |
| SLE | 1990 | 0.64 | 0.83 | 0.77 |
| SLE | 1991 | 0.63 | 0.56 | 1.13 |
| SLE | 1992 | 0.62 | 0.64 | 0.97 |
| SLE | 1993 | 0.60 | 0.63 | 0.96 |
| SLE | 1994 | 0.58 | 0.41 | 1.41 |
| SLE | 1995 | 0.55 | 0.43 | 1.27 |
| SLE | 1996 | 0.52 | 0.65 | 0.79 |
| SLE | 1997 | 0.49 | 0.26 | 1.87 |
| SLE | 1998 | 0.47 | 0.56 | 0.84 |
| SLE | 1999 | 0.47 | NA   | NA   |
| SLE | 2000 | 0.47 | 0.24 | 1.97 |
| SLE | 2001 | 0.49 | 0.38 | 1.29 |
| SLE | 2002 | 0.51 | 0.52 | 0.99 |
| SLE | 2003 | 0.54 | 0.70 | 0.77 |
| SLE | 2004 | 0.57 | 0.61 | 0.94 |
| SLE | 2005 | 0.61 | 0.64 | 0.95 |
| SLE | 2006 | 0.64 | 0.95 | 0.67 |
| SLE | 2007 | 0.67 | 0.79 | 0.85 |
| SLE | 2008 | 0.71 | 0.87 | 0.82 |
| SLE | 2009 | 0.75 | 0.91 | 0.82 |
| SLE | 2010 | 0.78 | 0.76 | 1.02 |
| SLE | 2011 | 0.80 | 0.76 | 1.05 |
| SLE | 2012 | 0.82 | 0.91 | 0.90 |
| SLE | 2013 | 0.84 | 0.92 | 0.91 |
| SLE | 2014 | 0.85 | 0.83 | 1.02 |
| SLE | 2015 | 0.85 | 0.86 | 0.99 |
| SOM | 1980 | 0.08 | 0.09 | 0.90 |
| SOM | 1981 | 0.09 | 0.02 | 4.31 |
| SOM | 1982 | 0.10 | 0.04 | 2.39 |

|     |      |      |      |      |
|-----|------|------|------|------|
| SOM | 1983 | 0.11 | 0.05 | 2.18 |
| SOM | 1984 | 0.13 | 0.10 | 1.26 |
| SOM | 1985 | 0.15 | 0.22 | 0.66 |
| SOM | 1986 | 0.17 | 0.17 | 0.97 |
| SOM | 1987 | 0.18 | 0.25 | 0.74 |
| SOM | 1988 | 0.20 | 0.26 | 0.77 |
| SOM | 1989 | 0.21 | 0.18 | 1.16 |
| SOM | 1990 | 0.22 | NA   | NA   |
| SOM | 1991 | 0.22 | NA   | NA   |
| SOM | 1992 | 0.22 | NA   | NA   |
| SOM | 1993 | 0.22 | NA   | NA   |
| SOM | 1994 | 0.22 | NA   | NA   |
| SOM | 1995 | 0.21 | NA   | NA   |
| SOM | 1996 | 0.20 | NA   | NA   |
| SOM | 1997 | 0.19 | 0.19 | 1.02 |
| SOM | 1998 | 0.19 | 0.24 | 0.78 |
| SOM | 1999 | 0.18 | 0.18 | 1.01 |
| SOM | 2000 | 0.18 | 0.33 | 0.55 |
| SOM | 2001 | 0.19 | 0.33 | 0.57 |
| SOM | 2002 | 0.19 | 0.40 | 0.49 |
| SOM | 2003 | 0.21 | 0.40 | 0.52 |
| SOM | 2004 | 0.23 | 0.30 | 0.75 |
| SOM | 2005 | 0.25 | 0.35 | 0.72 |
| SOM | 2006 | 0.29 | 0.26 | 1.12 |
| SOM | 2007 | 0.34 | 0.40 | 0.84 |
| SOM | 2008 | 0.38 | 0.42 | 0.91 |
| SOM | 2009 | 0.42 | 0.51 | 0.83 |
| SOM | 2010 | 0.46 | 0.64 | 0.71 |
| SOM | 2011 | 0.47 | 0.60 | 0.79 |
| SOM | 2012 | 0.48 | 0.61 | 0.79 |
| SOM | 2013 | 0.48 | 0.34 | 1.41 |
| SOM | 2014 | 0.47 | 0.65 | 0.73 |
| SOM | 2015 | 0.47 | 0.44 | 1.07 |
| SSD | 1980 | 0.31 | NA   | NA   |
| SSD | 1981 | 0.31 | NA   | NA   |
| SSD | 1982 | 0.31 | NA   | NA   |
| SSD | 1983 | 0.32 | NA   | NA   |
| SSD | 1984 | 0.32 | NA   | NA   |
| SSD | 1985 | 0.32 | NA   | NA   |
| SSD | 1986 | 0.33 | NA   | NA   |
| SSD | 1987 | 0.33 | NA   | NA   |
| SSD | 1988 | 0.33 | NA   | NA   |
| SSD | 1989 | 0.34 | NA   | NA   |
| SSD | 1990 | 0.34 | NA   | NA   |
| SSD | 1991 | 0.34 | NA   | NA   |
| SSD | 1992 | 0.35 | NA   | NA   |
| SSD | 1993 | 0.35 | NA   | NA   |
| SSD | 1994 | 0.35 | NA   | NA   |
| SSD | 1995 | 0.35 | NA   | NA   |
| SSD | 1996 | 0.35 | NA   | NA   |



|     |      |      |      |      |
|-----|------|------|------|------|
| SSD | 1997 | 0.35 | NA   | NA   |
| SSD | 1998 | 0.34 | NA   | NA   |
| SSD | 1999 | 0.32 | NA   | NA   |
| SSD | 2000 | 0.29 | NA   | NA   |
| SSD | 2001 | 0.26 | NA   | NA   |
| SSD | 2002 | 0.25 | NA   | NA   |
| SSD | 2003 | 0.23 | NA   | NA   |
| SSD | 2004 | 0.22 | NA   | NA   |
| SSD | 2005 | 0.22 | NA   | NA   |
| SSD | 2006 | 0.21 | NA   | NA   |
| SSD | 2007 | 0.21 | 0.30 | 0.70 |
| SSD | 2008 | 0.21 | 0.30 | 0.71 |
| SSD | 2009 | 0.22 | 0.50 | 0.44 |
| SSD | 2010 | 0.24 | 0.43 | 0.55 |
| SSD | 2011 | 0.25 | 0.46 | 0.53 |
| SSD | 2012 | 0.25 | 0.68 | 0.37 |
| SSD | 2013 | 0.26 | 0.56 | 0.46 |
| SSD | 2014 | 0.26 | 0.58 | 0.45 |
| SSD | 2015 | 0.27 | 0.50 | 0.53 |
| SUR | 1980 | 0.54 | 0.25 | 2.18 |
| SUR | 1981 | 0.57 | 0.27 | 2.11 |
| SUR | 1982 | 0.60 | 0.61 | 0.98 |
| SUR | 1983 | 0.63 | 0.85 | 0.74 |
| SUR | 1984 | 0.65 | 0.80 | 0.82 |
| SUR | 1985 | 0.68 | 0.84 | 0.80 |
| SUR | 1986 | 0.70 | 0.80 | 0.87 |
| SUR | 1987 | 0.71 | 0.71 | 1.01 |
| SUR | 1988 | 0.73 | 0.64 | 1.14 |
| SUR | 1989 | 0.75 | 0.72 | 1.04 |
| SUR | 1990 | 0.77 | 0.83 | 0.93 |
| SUR | 1991 | 0.78 | 0.75 | 1.05 |
| SUR | 1992 | 0.80 | 0.74 | 1.08 |
| SUR | 1993 | 0.81 | 0.76 | 1.07 |
| SUR | 1994 | 0.83 | 0.74 | 1.12 |
| SUR | 1995 | 0.84 | 0.84 | 1.00 |
| SUR | 1996 | 0.85 | 0.85 | 1.00 |
| SUR | 1997 | 0.85 | 0.81 | 1.06 |
| SUR | 1998 | 0.86 | 0.90 | 0.95 |
| SUR | 1999 | 0.86 | 0.85 | 1.01 |
| SUR | 2000 | 0.85 | 0.71 | 1.20 |
| SUR | 2001 | 0.85 | 0.68 | 1.25 |
| SUR | 2002 | 0.84 | 0.73 | 1.16 |
| SUR | 2003 | 0.83 | 0.75 | 1.11 |
| SUR | 2004 | 0.82 | 0.85 | 0.97 |
| SUR | 2005 | 0.80 | 0.83 | 0.97 |
| SUR | 2006 | 0.78 | 0.84 | 0.93 |
| SUR | 2007 | 0.76 | 0.84 | 0.91 |
| SUR | 2008 | 0.75 | 0.85 | 0.88 |
| SUR | 2009 | 0.75 | 0.87 | 0.86 |
| SUR | 2010 | 0.75 | 0.96 | 0.78 |

|     |      |      |      |       |
|-----|------|------|------|-------|
| SUR | 2011 | 0.75 | 0.86 | 0.87  |
| SUR | 2012 | 0.75 | 0.84 | 0.90  |
| SUR | 2013 | 0.76 | 0.87 | 0.88  |
| SUR | 2014 | 0.77 | 0.85 | 0.91  |
| SUR | 2015 | 0.79 | 0.89 | 0.88  |
| TCD | 1980 | 0.15 | NA   | NA    |
| TCD | 1981 | 0.15 | NA   | NA    |
| TCD | 1982 | 0.15 | NA   | NA    |
| TCD | 1983 | 0.15 | 0.01 | 14.69 |
| TCD | 1984 | 0.15 | NA   | NA    |
| TCD | 1985 | 0.16 | NA   | NA    |
| TCD | 1986 | 0.17 | 0.10 | 1.66  |
| TCD | 1987 | 0.17 | 0.14 | 1.23  |
| TCD | 1988 | 0.18 | 0.12 | 1.49  |
| TCD | 1989 | 0.19 | 0.47 | 0.39  |
| TCD | 1990 | 0.19 | 0.20 | 0.94  |
| TCD | 1991 | 0.19 | 0.18 | 1.06  |
| TCD | 1992 | 0.19 | 0.10 | 1.91  |
| TCD | 1993 | 0.19 | 0.13 | 1.49  |
| TCD | 1994 | 0.20 | 0.18 | 1.09  |
| TCD | 1995 | 0.20 | 0.18 | 1.11  |
| TCD | 1996 | 0.20 | 0.20 | 1.01  |
| TCD | 1997 | 0.21 | 0.24 | 0.86  |
| TCD | 1998 | 0.21 | 0.23 | 0.91  |
| TCD | 1999 | 0.21 | 0.33 | 0.64  |
| TCD | 2000 | 0.21 | 0.28 | 0.75  |
| TCD | 2001 | 0.21 | 0.27 | 0.78  |
| TCD | 2002 | 0.21 | 0.40 | 0.53  |
| TCD | 2003 | 0.21 | 0.47 | 0.45  |
| TCD | 2004 | 0.21 | 0.50 | 0.42  |
| TCD | 2005 | 0.21 | 0.58 | 0.37  |
| TCD | 2006 | 0.22 | 0.77 | 0.28  |
| TCD | 2007 | 0.22 | 0.70 | 0.32  |
| TCD | 2008 | 0.23 | 0.43 | 0.55  |
| TCD | 2009 | 0.25 | 0.75 | 0.33  |
| TCD | 2010 | 0.27 | 0.83 | 0.32  |
| TCD | 2011 | 0.28 | 0.70 | 0.41  |
| TCD | 2012 | 0.30 | 0.72 | 0.42  |
| TCD | 2013 | 0.31 | 0.80 | 0.39  |
| TCD | 2014 | 0.33 | 0.83 | 0.39  |
| TCD | 2015 | 0.34 | 0.92 | 0.37  |
| TGO | 1980 | 0.52 | NA   | NA    |
| TGO | 1981 | 0.53 | NA   | NA    |
| TGO | 1982 | 0.53 | NA   | NA    |
| TGO | 1983 | 0.54 | NA   | NA    |
| TGO | 1984 | 0.55 | NA   | NA    |
| TGO | 1985 | 0.55 | NA   | NA    |
| TGO | 1986 | 0.56 | NA   | NA    |
| TGO | 1987 | 0.57 | 0.54 | 1.05  |
| TGO | 1988 | 0.57 | 0.66 | 0.87  |

|     |      |      |      |      |
|-----|------|------|------|------|
| TGO | 1989 | 0.58 | 0.65 | 0.89 |
| TGO | 1990 | 0.58 | 0.77 | 0.75 |
| TGO | 1991 | 0.57 | 0.82 | 0.70 |
| TGO | 1992 | 0.56 | 0.76 | 0.74 |
| TGO | 1993 | 0.55 | 0.75 | 0.73 |
| TGO | 1994 | 0.53 | 0.71 | 0.75 |
| TGO | 1995 | 0.51 | 0.47 | 1.09 |
| TGO | 1996 | 0.50 | 0.27 | 1.85 |
| TGO | 1997 | 0.50 | 0.40 | 1.24 |
| TGO | 1998 | 0.51 | 0.36 | 1.40 |
| TGO | 1999 | 0.53 | 0.48 | 1.10 |
| TGO | 2000 | 0.55 | 0.50 | 1.10 |
| TGO | 2001 | 0.57 | 0.43 | 1.33 |
| TGO | 2002 | 0.60 | 0.59 | 1.01 |
| TGO | 2003 | 0.62 | 0.72 | 0.86 |
| TGO | 2004 | 0.65 | 0.71 | 0.91 |
| TGO | 2005 | 0.67 | 0.82 | 0.82 |
| TGO | 2006 | 0.69 | 0.87 | 0.80 |
| TGO | 2007 | 0.72 | 0.88 | 0.81 |
| TGO | 2008 | 0.74 | 0.89 | 0.83 |
| TGO | 2009 | 0.76 | 0.89 | 0.85 |
| TGO | 2010 | 0.78 | 0.92 | 0.85 |
| TGO | 2011 | 0.80 | 0.92 | 0.86 |
| TGO | 2012 | 0.81 | 0.84 | 0.96 |
| TGO | 2013 | 0.82 | 0.84 | 0.98 |
| TGO | 2014 | 0.83 | 0.87 | 0.95 |
| TGO | 2015 | 0.84 | 0.88 | 0.95 |
| TTO | 1980 | 0.72 | 0.26 | 2.77 |
| TTO | 1981 | 0.74 | 0.62 | 1.19 |
| TTO | 1982 | 0.76 | 0.54 | 1.40 |
| TTO | 1983 | 0.77 | 0.60 | 1.28 |
| TTO | 1984 | 0.78 | 0.65 | 1.19 |
| TTO | 1985 | 0.78 | 0.75 | 1.04 |
| TTO | 1986 | 0.77 | 0.70 | 1.10 |
| TTO | 1987 | 0.76 | 0.79 | 0.97 |
| TTO | 1988 | 0.75 | 0.82 | 0.92 |
| TTO | 1989 | 0.74 | 0.77 | 0.96 |
| TTO | 1990 | 0.73 | 0.82 | 0.89 |
| TTO | 1991 | 0.72 | 0.82 | 0.87 |
| TTO | 1992 | 0.70 | 0.87 | 0.81 |
| TTO | 1993 | 0.69 | 0.81 | 0.85 |
| TTO | 1994 | 0.68 | 0.85 | 0.80 |
| TTO | 1995 | 0.67 | 0.89 | 0.75 |
| TTO | 1996 | 0.66 | 0.89 | 0.74 |
| TTO | 1997 | 0.66 | 0.90 | 0.73 |
| TTO | 1998 | 0.67 | 0.91 | 0.73 |
| TTO | 1999 | 0.68 | 0.90 | 0.75 |
| TTO | 2000 | 0.69 | 0.90 | 0.77 |
| TTO | 2001 | 0.71 | 0.91 | 0.78 |
| TTO | 2002 | 0.72 | 0.96 | 0.75 |

|     |      |      |      |      |
|-----|------|------|------|------|
| TTO | 2003 | 0.74 | 0.91 | 0.81 |
| TTO | 2004 | 0.75 | 0.94 | 0.80 |
| TTO | 2005 | 0.77 | 0.95 | 0.81 |
| TTO | 2006 | 0.78 | 0.92 | 0.85 |
| TTO | 2007 | 0.79 | 0.88 | 0.90 |
| TTO | 2008 | 0.80 | 0.90 | 0.89 |
| TTO | 2009 | 0.82 | 0.90 | 0.91 |
| TTO | 2010 | 0.83 | 0.90 | 0.92 |
| TTO | 2011 | 0.84 | 0.90 | 0.93 |
| TTO | 2012 | 0.85 | 0.92 | 0.92 |
| TTO | 2013 | 0.86 | 0.92 | 0.93 |
| TTO | 2014 | 0.87 | 0.92 | 0.94 |
| TTO | 2015 | 0.88 | 0.96 | 0.91 |
| TZA | 1980 | 0.60 | 0.59 | 1.02 |
| TZA | 1981 | 0.61 | 0.55 | 1.11 |
| TZA | 1982 | 0.62 | 0.50 | 1.24 |
| TZA | 1983 | 0.64 | 0.52 | 1.23 |
| TZA | 1984 | 0.66 | 0.58 | 1.13 |
| TZA | 1985 | 0.68 | 0.67 | 1.01 |
| TZA | 1986 | 0.70 | 0.74 | 0.94 |
| TZA | 1987 | 0.72 | 0.79 | 0.91 |
| TZA | 1988 | 0.74 | 0.85 | 0.87 |
| TZA | 1989 | 0.76 | 0.77 | 0.99 |
| TZA | 1990 | 0.78 | 0.78 | 1.00 |
| TZA | 1991 | 0.80 | 0.81 | 0.98 |
| TZA | 1992 | 0.81 | 0.83 | 0.98 |
| TZA | 1993 | 0.82 | 0.83 | 0.99 |
| TZA | 1994 | 0.83 | 0.84 | 0.98 |
| TZA | 1995 | 0.83 | 0.81 | 1.02 |
| TZA | 1996 | 0.83 | 0.82 | 1.01 |
| TZA | 1997 | 0.83 | 0.79 | 1.05 |
| TZA | 1998 | 0.84 | 0.79 | 1.06 |
| TZA | 1999 | 0.84 | 0.76 | 1.11 |
| TZA | 2000 | 0.85 | 0.79 | 1.08 |
| TZA | 2001 | 0.86 | 0.87 | 0.99 |
| TZA | 2002 | 0.87 | 0.89 | 0.98 |
| TZA | 2003 | 0.88 | 0.95 | 0.93 |
| TZA | 2004 | 0.89 | 0.95 | 0.94 |
| TZA | 2005 | 0.89 | 0.90 | 0.99 |
| TZA | 2006 | 0.89 | 0.90 | 0.99 |
| TZA | 2007 | 0.90 | 0.83 | 1.08 |
| TZA | 2008 | 0.90 | 0.86 | 1.05 |
| TZA | 2009 | 0.91 | 0.85 | 1.07 |
| TZA | 2010 | 0.92 | 0.91 | 1.01 |
| TZA | 2011 | 0.92 | 0.92 | 1.00 |
| TZA | 2012 | 0.93 | 0.92 | 1.01 |
| TZA | 2013 | 0.94 | 0.91 | 1.03 |
| TZA | 2014 | 0.94 | 0.97 | 0.97 |
| TZA | 2015 | 0.94 | 0.98 | 0.96 |
| UGA | 1980 | 0.51 | NA   | NA   |

|     |      |      |      |      |
|-----|------|------|------|------|
| UGA | 1981 | 0.52 | 0.09 | 5.73 |
| UGA | 1982 | 0.53 | NA   | NA   |
| UGA | 1983 | 0.54 | 0.14 | 3.82 |
| UGA | 1984 | 0.55 | NA   | NA   |
| UGA | 1985 | 0.55 | 0.14 | 3.95 |
| UGA | 1986 | 0.56 | 0.21 | 2.67 |
| UGA | 1987 | 0.57 | 0.39 | 1.46 |
| UGA | 1988 | 0.58 | 0.40 | 1.45 |
| UGA | 1989 | 0.59 | 0.60 | 0.98 |
| UGA | 1990 | 0.60 | 0.77 | 0.78 |
| UGA | 1991 | 0.60 | 0.77 | 0.78 |
| UGA | 1992 | 0.61 | 0.71 | 0.86 |
| UGA | 1993 | 0.61 | 0.73 | 0.84 |
| UGA | 1994 | 0.62 | 0.79 | 0.79 |
| UGA | 1995 | 0.64 | 0.74 | 0.86 |
| UGA | 1996 | 0.66 | 0.72 | 0.91 |
| UGA | 1997 | 0.68 | 0.61 | 1.11 |
| UGA | 1998 | 0.71 | 0.56 | 1.28 |
| UGA | 1999 | 0.76 | 0.60 | 1.26 |
| UGA | 2000 | 0.79 | 0.58 | 1.37 |
| UGA | 2001 | 0.81 | 0.61 | 1.34 |
| UGA | 2002 | 0.82 | 0.72 | 1.14 |
| UGA | 2003 | 0.82 | 0.81 | 1.02 |
| UGA | 2004 | 0.81 | 0.87 | 0.94 |
| UGA | 2005 | 0.81 | 0.84 | 0.96 |
| UGA | 2006 | 0.80 | 0.80 | 1.00 |
| UGA | 2007 | 0.79 | 0.85 | 0.93 |
| UGA | 2008 | 0.79 | 0.79 | 1.00 |
| UGA | 2009 | 0.79 | 0.83 | 0.95 |
| UGA | 2010 | 0.80 | 0.80 | 1.00 |
| UGA | 2011 | 0.81 | 0.82 | 0.99 |
| UGA | 2012 | 0.83 | 0.78 | 1.06 |
| UGA | 2013 | 0.84 | 0.97 | 0.87 |
| UGA | 2014 | 0.85 | 0.99 | 0.86 |
| UGA | 2015 | 0.86 | 0.89 | 0.97 |
| VEN | 1980 | 0.52 | 0.56 | 0.93 |
| VEN | 1981 | 0.52 | 0.54 | 0.96 |
| VEN | 1982 | 0.52 | 0.53 | 0.98 |
| VEN | 1983 | 0.52 | 0.58 | 0.89 |
| VEN | 1984 | 0.52 | 0.33 | 1.58 |
| VEN | 1985 | 0.53 | 0.49 | 1.08 |
| VEN | 1986 | 0.54 | 0.58 | 0.94 |
| VEN | 1987 | 0.56 | 0.57 | 0.98 |
| VEN | 1988 | 0.57 | 0.56 | 1.02 |
| VEN | 1989 | 0.59 | 0.57 | 1.03 |
| VEN | 1990 | 0.60 | 0.63 | 0.95 |
| VEN | 1991 | 0.61 | 0.64 | 0.95 |
| VEN | 1992 | 0.62 | 0.67 | 0.92 |
| VEN | 1993 | 0.62 | 0.67 | 0.93 |
| VEN | 1994 | 0.62 | 0.63 | 0.98 |

|     |      |      |      |      |
|-----|------|------|------|------|
| VEN | 1995 | 0.62 | 0.68 | 0.91 |
| VEN | 1996 | 0.61 | 0.57 | 1.08 |
| VEN | 1997 | 0.62 | 0.60 | 1.03 |
| VEN | 1998 | 0.62 | 0.39 | 1.60 |
| VEN | 1999 | 0.64 | 0.76 | 0.85 |
| VEN | 2000 | 0.66 | 0.77 | 0.86 |
| VEN | 2001 | 0.68 | 0.70 | 0.97 |
| VEN | 2002 | 0.69 | 0.65 | 1.07 |
| VEN | 2003 | 0.71 | 0.68 | 1.04 |
| VEN | 2004 | 0.72 | 0.86 | 0.84 |
| VEN | 2005 | 0.72 | 0.87 | 0.83 |
| VEN | 2006 | 0.73 | 0.71 | 1.02 |
| VEN | 2007 | 0.73 | 0.62 | 1.18 |
| VEN | 2008 | 0.74 | 0.50 | 1.47 |
| VEN | 2009 | 0.75 | 0.84 | 0.89 |
| VEN | 2010 | 0.76 | 0.78 | 0.97 |
| VEN | 2011 | 0.77 | 0.78 | 0.99 |
| VEN | 2012 | 0.78 | 0.81 | 0.96 |
| VEN | 2013 | 0.79 | 0.82 | 0.96 |
| VEN | 2014 | 0.80 | 0.78 | 1.02 |
| VEN | 2015 | 0.81 | 0.87 | 0.93 |
| ZMB | 1980 | 0.60 | NA   | NA   |
| ZMB | 1981 | 0.61 | NA   | NA   |
| ZMB | 1982 | 0.63 | NA   | NA   |
| ZMB | 1983 | 0.65 | 0.83 | 0.78 |
| ZMB | 1984 | 0.67 | 0.58 | 1.15 |
| ZMB | 1985 | 0.69 | NA   | NA   |
| ZMB | 1986 | 0.71 | 0.66 | 1.08 |
| ZMB | 1987 | 0.73 | 0.65 | 1.13 |
| ZMB | 1988 | 0.75 | 0.63 | 1.19 |
| ZMB | 1989 | 0.77 | 0.58 | 1.32 |
| ZMB | 1990 | 0.78 | 0.71 | 1.10 |
| ZMB | 1991 | 0.79 | 0.91 | 0.87 |
| ZMB | 1992 | 0.80 | 0.61 | 1.31 |
| ZMB | 1993 | 0.80 | 0.67 | 1.20 |
| ZMB | 1994 | 0.80 | 0.86 | 0.93 |
| ZMB | 1995 | 0.79 | 0.82 | 0.97 |
| ZMB | 1996 | 0.79 | 0.83 | 0.95 |
| ZMB | 1997 | 0.78 | 0.70 | 1.12 |
| ZMB | 1998 | 0.79 | NA   | NA   |
| ZMB | 1999 | 0.79 | 0.92 | 0.86 |
| ZMB | 2000 | 0.79 | 0.76 | 1.04 |
| ZMB | 2001 | 0.79 | NA   | NA   |
| ZMB | 2002 | 0.79 | 0.88 | 0.90 |
| ZMB | 2003 | 0.80 | 0.91 | 0.88 |
| ZMB | 2004 | 0.81 | 0.94 | 0.86 |
| ZMB | 2005 | 0.81 | 0.91 | 0.89 |
| ZMB | 2006 | 0.82 | 0.97 | 0.85 |
| ZMB | 2007 | 0.83 | 0.92 | 0.90 |
| ZMB | 2008 | 0.83 | 0.95 | 0.88 |

|     |      |      |      |      |
|-----|------|------|------|------|
| ZMB | 2009 | 0.84 | 0.98 | 0.86 |
| ZMB | 2010 | 0.85 | 0.84 | 1.01 |
| ZMB | 2011 | 0.85 | 0.81 | 1.05 |
| ZMB | 2012 | 0.86 | 0.78 | 1.10 |
| ZMB | 2013 | 0.86 | 0.79 | 1.09 |
| ZMB | 2014 | 0.87 | 0.86 | 1.01 |
| ZMB | 2015 | 0.88 | 0.90 | 0.97 |

---
